# Supplementary material for: 3-Halo-5,6-dihydro-4 H -1,2-oxazine N -oxides as synthetic equivalents of unsaturated nitrile oxides in the [3 + 2]-cycloaddition with arynes: synthesis of substituted 3-vinyl-1,2-benzisoxazoles
Source: Royal Society of Chemistry journal article supplement (doi:10.1039/d4ob00391h), 2024-01-01

## Supporting information

for

### **3-Halo-5,6-dihydro-4*H*-1,2-oxazine *N*-oxides as synthetic equivalents of unsaturated nitrile oxides in the [3+2]-cycloaddition with arynes. Synthesis of substituted 3-vinyl-1,2-benzisoxazoles**

Alexander A. Lukoyanov,<sup>a</sup> Svetlana A. Aksenova,<sup>b</sup> Andrey A. Tabolin <sup>\*a</sup> and Alexey Yu. Sukhorukov<sup>a</sup>

<sup>a</sup> *N. D. Zelinsky Institute of Organic Chemistry, Russian Academy of Sciences, Leninsky prosp. 47, Moscow, 119991, Russian Federation*

<sup>b</sup> *A. N. Nesmeyanov Institute of Organoelement Compounds, Russian Academy of Sciences, Vavilov str. 28, Moscow, 119334, Russian Federation*

E-mail: atabolin@ioc.ac.ru; tabolin87@mail.ru

#### **Table of contents**

|                                                                                                                                                                                |    |
|--------------------------------------------------------------------------------------------------------------------------------------------------------------------------------|----|
| General experimental.                                                                                                                                                          | 2  |
| Preparation of bromonitroalkenes.                                                                                                                                              | 5  |
| List of starting compounds <b>1-2</b> .                                                                                                                                        | 9  |
| Preparation of starting 5,6-dihydro-4 <i>H</i> -1,2-oxazine <i>N</i> -oxides <b>2 (GP-2)</b> .                                                                                 | 9  |
| General procedure for reaction of aryne precursors <b>1</b> and <i>N</i> -oxides <b>2</b> . Synthesis of vinyl benzisoxazoles <b>3</b> and benzofurooxazines <b>4 (GP-3)</b> . | 21 |
| Post transformations of benzisoxazole <b>3aa</b> .                                                                                                                             | 37 |
| References                                                                                                                                                                     | 41 |
| Copies of NMR spectra                                                                                                                                                          | 42 |

## General experimental

All reactions were performed in oven-dried (150 °C) glassware. Most of the chemicals were acquired from commercial sources and used as received. Petroleum ether (PE), ethyl acetate, and *tert*-butyl methyl ether (MTBE) were distilled. CH<sub>3</sub>CN, CH<sub>2</sub>Cl<sub>2</sub>, CHCl<sub>3</sub> and toluene were distilled from CaH<sub>2</sub> prior to use. Triethylamine was distilled from CaH<sub>2</sub>. Brine refers to saturated aqueous solution of NaCl. TLC was performed on silica coated on aluminium with UV254 indicator. Visualization was accomplished with UV and/or anisaldehyde/H<sub>2</sub>SO<sub>4</sub>/EtOH stain and/or I<sub>2</sub>/silica. Column chromatography was performed on silica (0.04–0.063 mm, 60 Å). NMR spectra were recorded at 300K on Bruker AM300, Fourier 300HD and Avance NEO spectrometers at the following spectrometer frequencies: 300 MHz (<sup>1</sup>H NMR), 75 MHz (<sup>13</sup>C NMR), 282 MHz (<sup>19</sup>F NMR). Multiplicities are assigned as s (singlet), d (doublet), t (triplet), q (quartet), quint (quintet), m (multiplet), br (broad), app (apparent). Assignment was made using 2D NMR spectra for selected products. For other products signals were assigned by analogy. High resolution mass spectra were acquired on Bruker micrOTOF spectrometer using electrospray ionization (ESI). Melting points were determined in capillary tubes on melting point determination apparatus or on a Koffler melting point apparatus and are uncorrected.

## X-ray crystallography

X-ray diffraction data for **3ac** were collected at 100 K with a Bruker Quest D8 CMOS diffractometer, using graphite monochromated Mo-K $\alpha$  radiation ( $\lambda = 0.71073$  Å). X-ray diffraction data for **4da** were collected at 100K on a four-circle Rigaku Synergy S diffractometer equipped with a HyPix6000HE area-detector (kappa geometry, shutterless  $\omega$ -scan technique), using monochromatized Cu K $\alpha$ -radiation and the intensity data were integrated and corrected for absorption and decay by the CrysAlisPro program.<sup>s1a</sup> Structures were solved using Intrinsic Phasing with the ShelXT<sup>s1b</sup> structure solution program in Olex2<sup>s1c</sup> and then refined with the XL<sup>s1d,s1e</sup> refinement package using Least-Squares minimization against  $F^2_{hkl}$  in the anisotropic approximation for non-hydrogen atoms. The positions of hydrogen atoms were calculated, and they were refined in the isotropic approximation within the riding model. Crystal data and structure refinement parameters are given in Tables S1 and S2.

**Table S1.** Crystal data and structure refinement parameters for **3ac**.

|                                                            |                                      |
|------------------------------------------------------------|--------------------------------------|
| Empirical formula                                          | C <sub>15</sub> H <sub>10</sub> ClNO |
| Formula weight                                             | 255.69                               |
| T, K                                                       | 100                                  |
| Crystal system                                             | Monoclinic                           |
| Space group                                                | P2 <sub>1</sub> /c                   |
| Z                                                          | 4                                    |
| a, Å                                                       | 7.37990(10)                          |
| b, Å                                                       | 13.7636(3)                           |
| c, Å                                                       | 11.7474(2)                           |
| α, °                                                       | 90                                   |
| β, °                                                       | 91.6480(10)                          |
| γ, °                                                       | 90                                   |
| V, Å <sup>3</sup>                                          | 1192.74(4)                           |
| D <sub>calc</sub> (g cm <sup>-3</sup> )                    | 1.424                                |
| Linear absorption, μ (cm <sup>-1</sup> )                   | 3.05                                 |
| F(000)                                                     | 528                                  |
| 2θ <sub>max</sub> , °                                      | 58                                   |
| Reflections measured                                       | 15544                                |
| Independent reflections                                    | 3168                                 |
| Observed reflections [ <i>I</i> > 2σ( <i>I</i> )]          | 2982                                 |
| Parameters                                                 | 163                                  |
| R1                                                         | 0.0314                               |
| wR2                                                        | 0.0815                               |
| GOF                                                        | 1.038                                |
| Δρ <sub>max</sub> / Δρ <sub>min</sub> (e Å <sup>-3</sup> ) | 0.337/-0.279                         |

**Table S2.** Crystal data and structure refinement parameters for **4da**.

|                                            |                                                   |
|--------------------------------------------|---------------------------------------------------|
| Empirical formula                          | C <sub>19</sub> H <sub>18</sub> BrNO <sub>3</sub> |
| Formula weight                             | 388.25                                            |
| T, K                                       | 100.00(10)                                        |
| Wavelength, Å                              | 1.54184                                           |
| Crystal system                             | Monoclinic                                        |
| Space group                                | P2 <sub>1</sub> /c                                |
| a, Å                                       | 8.15719(7)                                        |
| b, Å                                       | 16.71710(15)                                      |
| c, Å                                       | 12.13404(8)                                       |
| α, °                                       | 90                                                |
| β, °                                       | 92.3390(7)                                        |
| γ, °                                       | 90                                                |
| V, Å <sup>3</sup>                          | 1653.27(2)                                        |
| Z                                          | 4                                                 |
| D <sub>calc</sub> (g cm <sup>-3</sup> )    | 1.560                                             |
| Absorption coefficient (mm <sup>-1</sup> ) | 3.534                                             |
| F(000)                                     | 792                                               |
| Crystal size                               | 0.537 x 0.35 x 0.205 mm <sup>3</sup>              |
| Theta range for data collection            | 4.505 to 80.103°.                                 |
| Index ranges                               | -10<=h<=10, -21<=k<=21, -15<=l<=14                |
| Reflections collected                      | 19247                                             |
| Independent reflections                    | 3602 [R(int) = 0.0440]                            |
| Observed reflections                       | 3575                                              |
| Completeness to theta = 67.684°            | 100.0 %                                           |
| Absorption correction                      | Analytical                                        |
| Max. and min. transmission                 | 0.664 and 0.351                                   |
| Refinement method                          | Full-matrix least-squares on F <sup>2</sup>       |
| Data / restraints / parameters             | 3602 / 0 / 221                                    |
| Goodness-of-fit on F <sup>2</sup>          | 1.097                                             |
| Final R indices [I>2σ(I)]                  | R1 = 0.0337, wR2 = 0.0908                         |
| R indices (all data)                       | R1 = 0.0340, wR2 = 0.0910                         |
| Extinction coefficient                     | 0.0061(3)                                         |
| Largest diff. peak and hole                | 0.714 and -0.914 e.Å <sup>-3</sup>                |

### Preparation of bromonitroalkenes (GP-1):

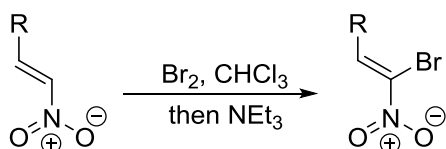

Bromonitroalkenes were prepared using a reported procedure.<sup>s2</sup> as follows:

The solution of Br<sub>2</sub> (1.01 equiv.) in CHCl<sub>3</sub> (1.1 mL / 1 mmol of Br<sub>2</sub>) was added to the corresponding nitroalkene. The mixture was refluxed for 3-6 h, cooled to 0 °C, and Et<sub>3</sub>N (1.3 equiv.) was added. The reaction mixture was maintained for 60 min and poured into a mixture of EtOAc (20 mL) and H<sub>2</sub>O (15 mL). The organic layer was washed with H<sub>2</sub>O (15 mL), brine (15 mL), dried (Na<sub>2</sub>SO<sub>4</sub>) and concentrated under reduced pressure to give title compound.

#### (Z)-1-(2-Bromo-2-nitrovinyl)-4-fluorobenzene

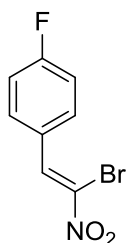

Starting nitroalkene was prepared according to the literature procedure.<sup>s3</sup>

Prepared from (*E*)-1-fluoro-4-(2-nitrovinyl)benzene (165 mg, 0.99 mmol) according to GP-1. The mixture was refluxed for 4 h. Yield: 223 mg (92%) of title compound as yellow solid, that was used without additional purification.

NMR matched previously reported data.<sup>s4</sup>

#### (Z)-1-(2-Bromo-2-nitrovinyl)-4-methylbenzene

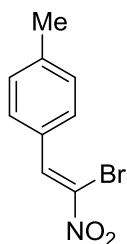

Starting nitroalkene was prepared according to the literature procedure.<sup>s3</sup>

Prepared from (*E*)-1-methyl-4-(2-nitrovinyl)benzene (148 mg, 0.91 mmol). according to GP-1. The mixture was refluxed for 4 h. Column chromatography (PE/EtOAc, 50:1) afforded 150 mg (68%) of title compound as yellow solid.

R<sub>f</sub> = 0.75 (PE/EtOAc, 10:1, UV, anisaldehyde).

NMR matched previously reported data.<sup>s4</sup>

### (Z)-Ethyl 2-(4-(2-bromo-2-nitrovinyl)phenoxy)-2-methylpropanoate

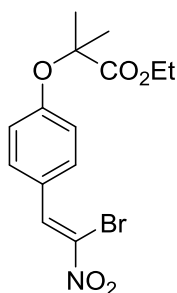

Starting nitroalkene was prepared according to the literature procedure.<sup>s3</sup>

Prepared from ethyl (*E*)-2-methyl-2-(4-(2-nitrovinyl)phenoxy)propanoate (250 mg, 0.90 mmol) according to GP-1. The mixture was refluxed for 3 h. The crude product was subjected to column chromatography on silica gel (PE/ EtOAc, 20:1) to give 266 mg (83%) of title compound as yellow oil.

$R_f = 0.49$  (PE/EtOAc, 5:1, UV, anisaldehyde).

*Z*-configuration was assigned by similarity with other halonitroalkenes.<sup>s3,s4</sup>

<sup>1</sup>H NMR (300 MHz, CDCl<sub>3</sub>):  $\delta$  1.25 (t,  $J = 7.1$  Hz, 3H, CH<sub>2</sub>CH<sub>3</sub>), 1.69 (s, 6H, Me<sub>2</sub>C), 4.26 (q,  $J = 7.1$  Hz, 2H, OCH<sub>2</sub>CH<sub>3</sub>), 6.91 (d,  $J = 8.7$  Hz, 2H, CH<sub>Ar</sub>), 7.88 (d,  $J = 8.7$  Hz, 2H, CH<sub>Ar</sub>), 8.63 (s, 1H, =CH).

<sup>13</sup>C NMR (75 MHz, DEPT, CDCl<sub>3</sub>):  $\delta$  14.1 (CH<sub>2</sub>CH<sub>3</sub>), 25.4 (Me<sub>2</sub>C), 61.8 (OCH<sub>2</sub>CH<sub>3</sub>), 79.5 (Me<sub>2</sub>C–O), 118.0 (CH<sub>Ar</sub>), 123.0 (C), 125.8 (C), 133.0 (CH<sub>Ar</sub>), 136.1 (=CH), 159.1 (C<sub>Ar</sub>–O), 173.5 (CO<sub>2</sub>).

HRMS (ESI-TOF):  $m/z$  [M + H]<sup>+</sup> calcd. for C<sub>14</sub>H<sub>17</sub><sup>79</sup>BrNO<sub>5</sub> 358.0285; found: 358.0282.

### (Z)-1-(2-Bromo-2-nitrovinyl)-3-methoxybenzene

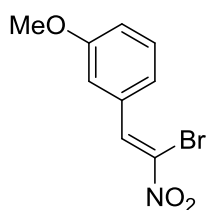

Mixture of BrCH<sub>2</sub>NO<sub>2</sub> (50  $\mu$ L, 100 mg, 0.71 mmol, 1.0 equiv.), 3-methoxybenzaldehyde (124  $\mu$ L, 139 mg, 1.02 mmol, 1.43 equiv), and NH<sub>4</sub>OAc (19 mg, 0.25 mmol, 0.35 equiv.) in AcOH (5 mL) was refluxed for 2 h. After cooling to r.t., it was poured into a mixture of EtOAc (20 mL) and H<sub>2</sub>O (15 mL). The organic layer was washed with H<sub>2</sub>O (15 mL), NaHCO<sub>3</sub> (15mL), brine (15 mL), dried (Na<sub>2</sub>SO<sub>4</sub>) and concentrated under reduced pressure. Crude product was subjected to column chromatography on silica gel (PE/ EtOAc, 50:1) to give 50 mg (27%) of title compound as yellow solid.

$R_f = 0.75$  (PE/EtOAc, 10:1, UV, anisaldehyde).

NMR matched previously reported data.<sup>s5</sup>

#### **(Z)-1-(2-Bromo-2-nitrovinyl)-2-methoxybenzene**

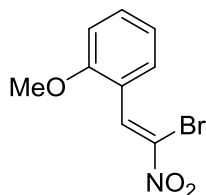

Starting nitroalkene was prepared according to the literature procedure.<sup>s6</sup>

Prepared from (*E*)-1-methoxy-2-(2-nitrovinyl)benzene (200 mg, 1.12 mmol) according to GP-1. The mixture was refluxed for 4 h. Yield: 288 mg (99%) of title compound as yellow solid, that was used without additional purification.

NMR matched previously reported data.<sup>s4</sup>

#### **(Z)-1-(2-Bromo-2-nitrovinyl)naphthalene**

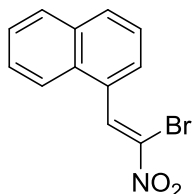

Starting nitroalkene was prepared according to the literature procedure.<sup>s6</sup>

Prepared from (*E*)-1-(2-nitrovinyl)naphthalene (200 mg, 1.00 mmol). according to GP-1. The mixture was refluxed for 6 h. Yield: 279 mg (99%) of title compound as yellow solid, that was used without additional purification.

NMR matched previously reported data.<sup>s5</sup>

#### **(Z)-1-Bromo-2-(2-bromo-2-nitrovinyl)-4,5-dimethoxybenzene**

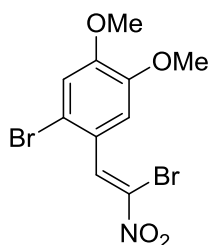

Starting nitroalkene was prepared according to the literature procedure.<sup>s3</sup>

Prepared from (*E*)-1-bromo-4,5-dimethoxy-2-(2-nitrovinyl)benzene (165 mg, 0.57 mmol) according to GP-1. The mixture was refluxed for 4 h. Yield: 206 mg (98%) of title compound as yellow solid, that was used without additional purification.

NMR matched previously reported data.<sup>s7</sup>

**(Z)-(2-Bromo-2-nitrovinyl)cyclopropane**

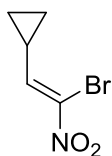

Bromonitromethane (300 mg, 150  $\mu$ L, 2.14 mmol, 1.5 equiv.) was dissolved in THF/<sup>t</sup>BuOH mixture (0.72 mL/0.72 mL). The solution was cooled to 0 °C (ice bath) and then <sup>t</sup>BuOK (16 mg, 0.14 mmol, 0.1 equiv) and cyclopropanecarbaldehyde (100 mg, 1.3 mmol, 1 equiv.) were consecutively added. The reaction was allowed to warm to r.t., stirred overnight (14 h) and poured into a mixture of EtOAc (15 mL) and H<sub>2</sub>O (15 mL). The organic phase was separated, and the aqueous phase was extracted with EtOAc (3  $\times$  15 mL). The combined organic layers were washed with brine (30 mL), dried over anhydrous Na<sub>2</sub>SO<sub>4</sub>, and carefully concentrated under reduced pressure (37 °C, 150 mbar) to give 200 mg (67%) of crude 2-bromo-1-cyclopropyl-2-nitroethan-1-ol that was used without further purification.

To the cold solution (0 °C) of 2-bromo-1-cyclopropyl-2-nitroethan-1-ol (200 mg, 0.95 mmol) in CH<sub>2</sub>Cl<sub>2</sub> (3.8 mL) was added MsCl (100  $\mu$ L, 164 mg, 1.43 mmol, 1.5 equiv.). After 20 min of stirring, freshly distilled Et<sub>3</sub>N (330  $\mu$ L, 241 mg, 2.38 mmol, 2.5 equiv.) was added dropwise over 10 min. The reaction mixture was stirred for 60 min, kept in a fridge (0 °C) overnight (14 h) and poured into a mixture of Et<sub>2</sub>O (50 mL) and NaHSO<sub>4</sub> aq. solution (0.5 M, 50 mL). The organic phase was separated, and the aqueous phase was extracted with Et<sub>2</sub>O (50 mL). The combined organic layers were washed with brine (50 mL), dried (Na<sub>2</sub>SO<sub>4</sub>), and carefully concentrated under reduced pressure (37 °C, 150 mbar). The resulting crude product was subjected to column chromatography on silica gel (eluent: PE/EtOAc, 5:1, then 2:1) to give 138 mg (75%) of target nitroalkene as yellow oil.

R<sub>f</sub> = 0.75 (PE/EtOAc, 10:1, UV, anisaldehyde).

Z-configuration was assigned by similarity with other halonitroalkenes.<sup>s3,s4</sup>

<sup>1</sup>H NMR (300 MHz, CDCl<sub>3</sub>):  $\delta$  0.92-0.98 (m, 2H), 1.24-1.30 (m, 2H), 1.85 (dtt, *J* = 10.6, 7.9, 4.5 Hz, 1H, CH), 7.15 (d, *J* = 10.6 Hz, 1H, =CH).

<sup>13</sup>C NMR (75 MHz, DEPT, HMBC, CDCl<sub>3</sub>):  $\delta$  10.2 (CH<sub>2</sub>), 14.7 (CH), 128.1 (Br-C-NO<sub>2</sub>), 147.2 (=CH).

HRMS (ESI-TOF): *m/z* [M + Na]<sup>+</sup> calcd. for C<sub>5</sub>H<sub>6</sub><sup>79</sup>BrNO<sub>2</sub>Na 213.9474; found: 213.9478.



**List of starting compounds 1-2.**

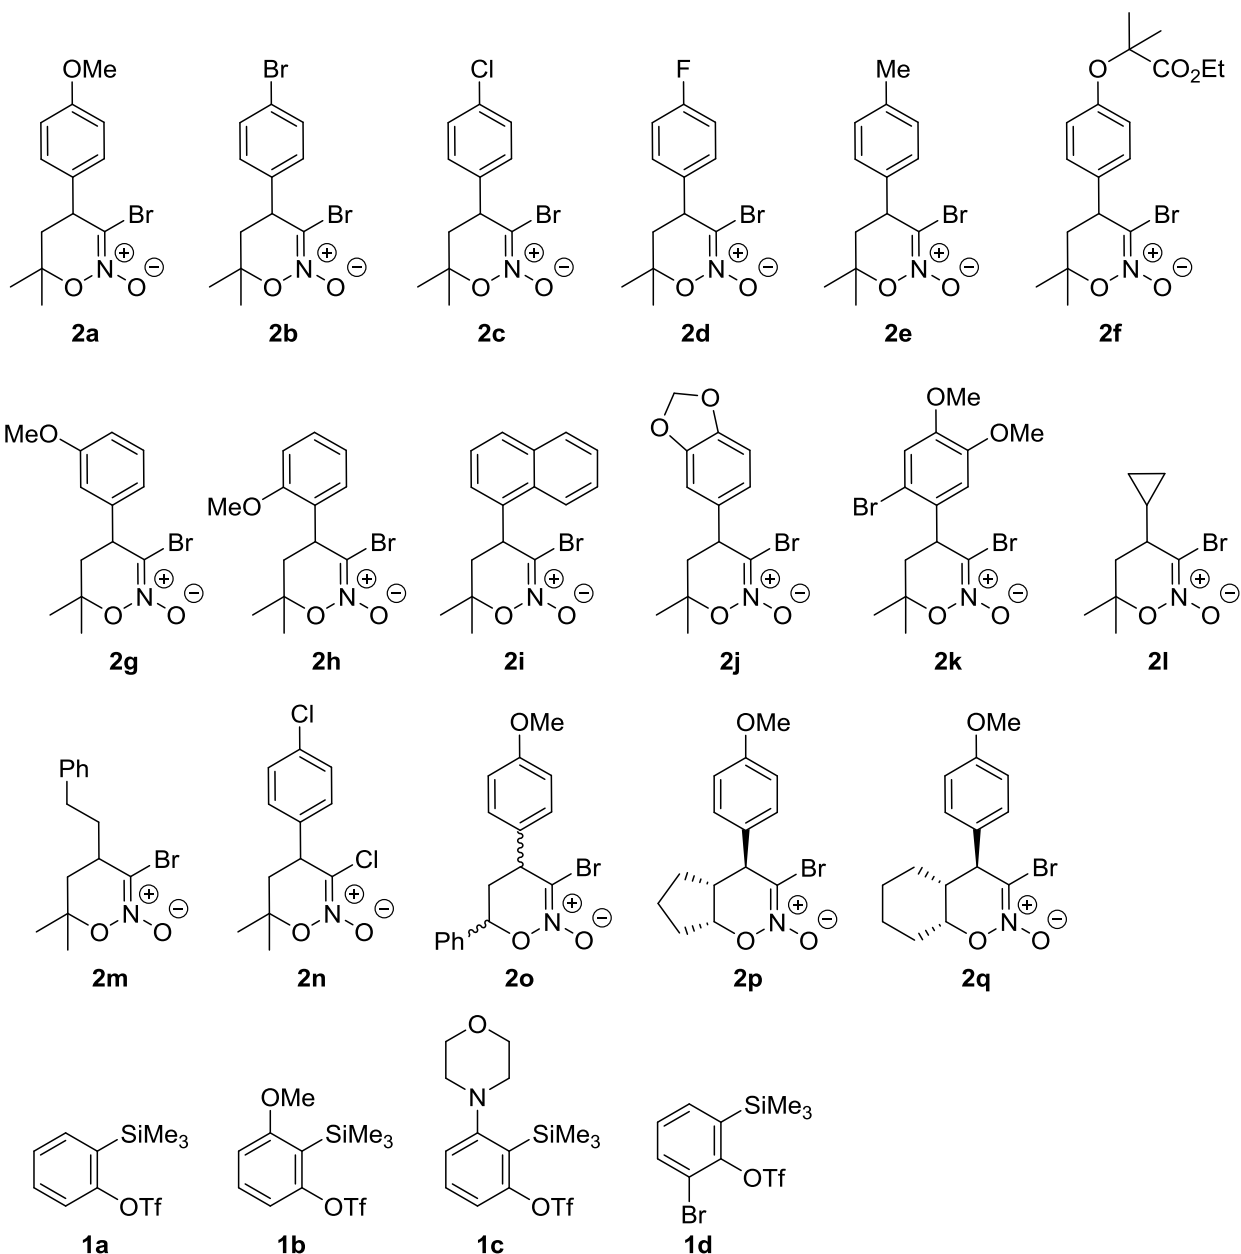

Arynes precursors **1** were commercially available and were used as received.

**Preparation of starting 5,6-dihydro-4H-1,2-oxazine N-oxides **2** (GP-2):**

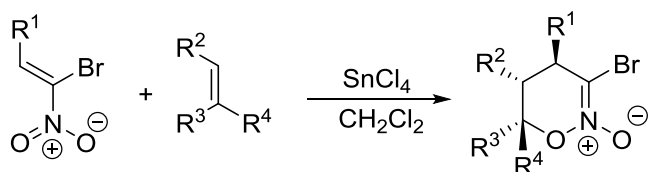

Nitronates **2** were prepared using a reported procedure<sup>s2</sup> as follows:

SnCl<sub>4</sub> (1.1-1.2 equiv) was added to the stirred solution of the corresponding bromonitroalkene (1 equiv.) in CH<sub>2</sub>Cl<sub>2</sub> (0.066 – 0.1 M) at -78 °C (unless otherwise stated) under

argon atmosphere. The reaction mixture was stirred for 10 min and then the corresponding alkene (2-30 equiv.) was added. The reaction mixture was stirred for 15 min – 72 h and then poured into a mixture of EtOAc (150 mL) and NaHCO<sub>3</sub> (sat. aq. soln, 100 mL). The organic layer was washed with saturated aqueous solution of NaHCO<sub>3</sub> (sat. aq. soln, 50 mL), H<sub>2</sub>O (100 mL), brine (50 mL), dried over Na<sub>2</sub>SO<sub>4</sub>, and evaporated under vacuum. Title compounds were isolated by column chromatography or recrystallization from PE/EtOAc mixture.

### 3-Bromo-4-(4-methoxyphenyl)-6,6-dimethyl-5,6-dihydro-4H-1,2-oxazine 2-oxide 2a

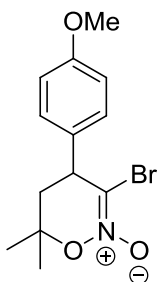

Starting bromonitroalkene was prepared according to the literature procedure.<sup>s2</sup>

Prepared according to GP-2 from (Z)-1-(2-bromo-2-nitrovinyl)-4-methoxybenzene (2.50 g, 9.7 mmol) and 2-methylpropene (2.7 g, 49 mmol, 5 equiv.) in CH<sub>2</sub>Cl<sub>2</sub> (97 ml) using 1.2 equiv of SnCl<sub>4</sub>. The reaction was stirred at -50 °C for 30 min. Recrystallization (hexane–EtOAc, 3:1) afforded 2.69 g (88%) of title compound as pale white crystals.

NMR matched previously reported data.<sup>s2</sup>

### 3-Bromo-4-(4-bromophenyl)-6,6-dimethyl-5,6-dihydro-4H-1,2-oxazine 2-oxide 2b

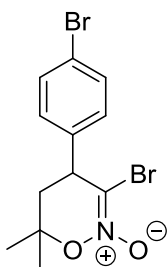

Starting bromonitroalkene was prepared according to the literature procedure.<sup>s8</sup>

Prepared according to GP-2 from (Z)-1-bromo-4-(2-bromo-2-nitrovinyl)benzene (376 mg, 1.22 mmol) and 2-methylpropene (1.37 g, 25 mmol, 20 equiv.) in toluene (12.3 ml) using 1.1 equiv of SnCl<sub>4</sub>. The reaction was stirred at -50 °C for 30 min and then kept at the fridge (-30 °C) for 60 h. Column chromatography (eluent: PE/EtOAc, 5:1, then 1:1) afforded 250 mg (56%) of target compound as white solid.

R<sub>f</sub> = 0.24 (PE/EtOAc, 3:1, UV, anisaldehyde).

mp = 127-128 °C (PE/EtOAc, 3:1).

$^1\text{H}$  NMR (300 MHz,  $\text{CDCl}_3$ ):  $\delta$  1.45 (s, 3H, Me(6)), 1.54 (s, 3H, Me(6)), 2.15 (dd,  $J = 13.9, 11.0$  Hz, 1H,  $\text{CH}_{2a}(5)$ ), 2.27 (dd,  $J = 13.9, 8.0$  Hz, 1H,  $\text{CH}_{2b}(5)$ ), 4.03 (dd,  $J = 11.0, 8.0$  Hz, 1H, CH(4)), 7.10 (d,  $J = 8.4$  Hz, 2H,  $\text{CH}_{Ar}$ ), 7.52 (d,  $J = 8.4$  Hz, 2H,  $\text{CH}_{Ar}$ ).

$^{13}\text{C}$  NMR (75 MHz, DEPT,  $\text{CDCl}_3$ ):  $\delta$  22.2 (Me(6)), 27.3 (Me(6)), 43.3 ( $\text{CH}_2(5)$ ), 47.0 (CH(4)), 83.3 (C(6)), 109.6 (C(3)=N), 122.0 ( $\text{C}_{Ar}$ ), 129.6 ( $\text{CH}_{Ar}$ ), 132.4 ( $\text{CH}_{Ar}$ ), 139.0 ( $\text{C}_{Ar}$ ).

HRMS (ESI-TOF):  $m/z$   $[\text{M} + \text{H}]^+$  calcd. for  $\text{C}_{12}\text{H}_{14}^{79}\text{Br}^{81}\text{BrNO}_2$  363.9366; found: 363.9365.

### 3-Bromo-4-(4-chlorophenyl)-6,6-dimethyl-5,6-dihydro-4H-1,2-oxazine 2-oxide 2c

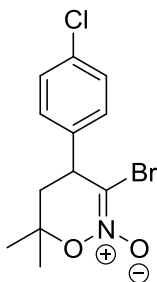

Starting bromonitroalkene was prepared according to the literature procedure.<sup>88</sup>

Prepared according to GP-2 from (*Z*)-1-(2-bromo-2-nitrovinyl)-4-chlorobenzene (228 mg, 0.87 mmol) and 2-methylpropene (244 mg, 4.3 mmol, 5 equiv.) in  $\text{CH}_2\text{Cl}_2$  (13.2 ml) using 1.2 equiv of  $\text{SnCl}_4$ . The reaction was stirred at  $-78$  °C for 60 min and then kept at the fridge ( $-30$  °C) overnight (14 h). Column chromatography (eluent: PE/EtOAc, 3:1, then 1:1) afforded 100 mg (56%) of target compound as white solid and 112 mg (49%) of starting bromonitroalkene.

$R_f = 0.30$  (PE/EtOAc, 2:1, UV, anisaldehyde).

mp = 129-131 °C (dec.).

$^1\text{H}$  NMR (300 MHz,  $\text{CDCl}_3$ ):  $\delta$  1.45 (s, 3H, Me(6)), 1.54 (s, 3H, Me(6)), 2.15 (dd,  $J = 13.8, 11.1$  Hz, 1H,  $\text{CH}_{2a}(5)$ ), 2.27 (dd,  $J = 13.9, 8.0$  Hz, 1H,  $\text{CH}_{2b}(5)$ ), 4.04 (dd,  $J = 10.9, 8.0$  Hz, 1H, CH(4)), 7.16 (d,  $J = 8.5$  Hz, 2H,  $\text{CH}_{Ar}$ ), 7.36 (d,  $J = 8.5$  Hz, 2H,  $\text{CH}_{Ar}$ ).

$^{13}\text{C}$  NMR (75 MHz, DEPT,  $\text{CDCl}_3$ ):  $\delta$  22.2 (Me(6)), 27.3 (Me(6)), 43.3 ( $\text{CH}_2(5)$ ), 46.9 (CH(4)), 83.3 (C(6)), 109.7 (C(3)=N), 129.2 ( $\text{CH}_{Ar}$ ), 129.4 ( $\text{CH}_{Ar}$ ), 133.9 ( $\text{C}_{Ar}$ ), 138.5 ( $\text{C}_{Ar}$ ).

HRMS (ESI-TOF):  $m/z$   $[\text{M} + \text{H}]^+$  calcd. for  $\text{C}_{12}\text{H}_{14}^{79}\text{BrClNO}_2$  317.9891; found: 317.9896.

### 3-Bromo-4-(4-fluorophenyl)-6,6-dimethyl-5,6-dihydro-4H-1,2-oxazine 2-oxide 2d

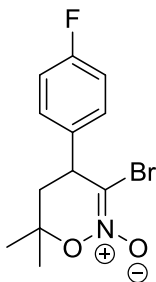

Prepared according to GP-2 from (*Z*)-1-(2-bromo-2-nitrovinyl)-4-fluorobenzene (220 mg, 0.89 mmol) and 2-methylpropene (250 mg, 4.5 mmol, 5 equiv.) in CH<sub>2</sub>Cl<sub>2</sub> (13.6 ml) using 1.2 equiv of SnCl<sub>4</sub>. The reaction was stirred at -78 °C for 30 min and then kept at the fridge (-30 °C) overnight (14 h). Column chromatography (eluent: PE/EtOAc, 10:1, then 2:1) afforded 161 mg (60%) of target compound as pale yellow solid.

R<sub>f</sub> = 0.33 (PE/EtOAc, 3:1, UV, anisaldehyde).

mp = 122-124 °C (dec.) (PE/EtOAc, 5:1).

<sup>1</sup>H NMR (300 MHz, CDCl<sub>3</sub>): δ 1.45 (s, 3H, Me), 1.55 (s, 3H, Me), 2.17 (dd, *J* = 13.8, 11.1 Hz, 1H, CH<sub>2a</sub>(5)), 2.27 (dd, *J* = 13.9, 8.0 Hz, 1H, CH<sub>2b</sub>(5)), 4.04 (dd, *J* = 10.9, 8.0 Hz, 1H, CH(4)), 7.07 (t, *J* = 8.6 Hz, 2H, CH<sub>Ar</sub>), 7.20 (dd, *J* = 8.7, 5.2 Hz, CH<sub>Ar</sub>).

<sup>13</sup>C NMR (75 MHz, DEPT, CDCl<sub>3</sub>): δ 22.2 (Me), 27.3 (Me), 43.5 (CH<sub>2</sub>(5)), 46.8 (CH(4)), 83.3 (C(6)), 110.2 (C(3)=N), 116.2 (d, <sup>2</sup>*J*<sub>CF</sub> = 21.8 Hz, CH<sub>Ar</sub>), 129.5 (d, <sup>3</sup>*J*<sub>CF</sub> = 8.2 Hz, CH<sub>Ar</sub>), 135.8 (d, <sup>4</sup>*J*<sub>CF</sub> = 3.3 Hz, C<sub>Ar</sub>), 162.3 (d, <sup>1</sup>*J*<sub>CF</sub> = 247.4 Hz, C-F).

<sup>19</sup>F NMR (282 MHz, CDCl<sub>3</sub>): δ -113.8 (tt, *J* = 8.4, 5.2 Hz).

HRMS (ESI-TOF): *m/z* [M + H]<sup>+</sup> calcd. for C<sub>12</sub>H<sub>14</sub>F<sup>79</sup>BrNO<sub>2</sub> 302.0186; found: 302.0184.

### 3-Bromo-6,6-dimethyl-4-*p*-tolyl-5,6-dihydro-4H-1,2-oxazine 2-oxide 2e

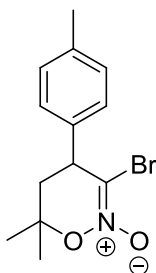

Prepared according to GP-2 from (*Z*)-1-(2-bromo-2-nitrovinyl)-4-methylbenzene (140 mg, 0.58 mmol) and 2-methylpropene (325 mg, 5.8 mmol, 10 equiv.) in CH<sub>2</sub>Cl<sub>2</sub> (5.8 ml) using 1.1 equiv of SnCl<sub>4</sub>. The reaction was stirred at -78 °C for 30 min, then additional portion of 2-methylpropene (325 mg, 5.8 mmol, 10 equiv.) was added and the reaction mixture was stirred for 2 h. Column chromatography (eluent: PE/EtOAc, 3:1 then 2:1) afforded 123 mg (72%) of target compound as pale yellow solid.

$R_f = 0.43$  (PE/EtOAc, 3:1, UV, anisaldehyde).

mp = 124-125 °C (PE/EtOAc, 3:1).

$^1\text{H}$  NMR (300 MHz,  $\text{CDCl}_3$ ):  $\delta$  1.45 (s, 3H, Me), 1.55 (s, 3H, Me), 2.12- 2.32 (m, 2H,  $\text{CH}_2(5)$ ), 2.37 (s, 3H,  $\text{Ar}-\underline{\text{CH}}_3$ ), 4.01 (dd,  $J = 10.8, 8.2$  Hz, 1H,  $\text{CH}(4)$ ), 7.11 (d,  $J = 8.0$  Hz, 2H,  $\text{CH}_{\text{Ar}}$ ), 7.20 (d,  $J = 8.0$  Hz, 2H,  $\text{CH}_{\text{Ar}}$ ).

$^{13}\text{C}$  NMR (75 MHz, DEPT,  $\text{CDCl}_3$ ):  $\delta$  21.2 (Me), 22.2 (Me), 27.3 ( $\text{Ar}-\underline{\text{C}}\text{H}_3$ ), 43.5 ( $\text{CH}_2(5)$ ), 47.1 ( $\text{CH}(4)$ ), 83.3 (C(6)), 110.8 (C(3)=N), 127.7 ( $\text{CH}_{\text{Ar}}$ ), 129.9 ( $\text{CH}_{\text{Ar}}$ ), 137.0 ( $\text{C}_{\text{Ar}}$ ), 137.9 ( $\text{C}_{\text{Ar}}$ ).

HRMS (ESI-TOF):  $m/z$   $[\text{M} + \text{H}]^+$  calcd. for  $\text{C}_{13}\text{H}_{17}^{79}\text{BrNO}_2$  298.0437; found: 298.0427.

### 3-Bromo-4-(4-((1-ethoxy-2-methyl-1-oxopropan-2-yl)oxy)phenyl)-6,6-dimethyl-5,6-dihydro-4H-1,2-oxazine 2-oxide 2f

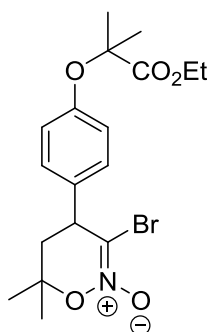

Prepared according to GP-2 from ethyl (Z)-2-(4-(2-bromo-2-nitrovinyl)phenoxy)-2-methylpropanoate (260 mg, 0.73 mmol) and 2-methylpropene (814 mg, 14 mmol, 20 equiv.) in  $\text{CHCl}_3$  (11 ml) using 1.1 equiv of  $\text{SnCl}_4$ . The reaction was stirred at -78 °C for 3 h and then kept at the fridge (-30 °C) overnight (14 h). Column chromatography (eluent: PE/EtOAc, 10:1 then 3:1 then 1:1) afforded 157 mg (52%) of target compound as colorless oil.

$R_f = 0.30$  (PE/EtOAc, 3:1, UV, anisaldehyde).

$^1\text{H}$  NMR (300 MHz,  $\text{CDCl}_3$ ):  $\delta$  1.23 (t,  $J = 7.1$  Hz, 3H,  $\text{CH}_2\underline{\text{C}}\text{H}_3$ ), 1.42 (s, 3H, Me(6)), 1.51 (s, 3H, Me(6)), 1.59 (s, 6H,  $\text{Me}_2\text{C}$ ), 2.11-2.27 (m, 2H,  $\text{CH}_2(5)$ ), 3.96 (dd,  $J = 10.8, 8.1$  Hz, 1H,  $\text{CH}(4)$ ), 4.22 (q,  $J = 7.1$  Hz, 2H,  $\text{OCH}_2\underline{\text{C}}\text{H}_3$ ), 6.81 (d,  $J = 8.7$  Hz, 2H,  $\text{CH}_{\text{Ar}}$ ), 7.06 (d,  $J = 8.7$  Hz, 2H,  $\text{CH}_{\text{Ar}}$ ).

$^{13}\text{C}$  NMR (75 MHz, DEPT, HSQC, HMBC,  $\text{CDCl}_3$ ):  $\delta$  14.1 ( $\text{CH}_2\underline{\text{C}}\text{H}_3$ ), 22.2 (Me(6)), 25.37 and 25.41 ( $\text{Me}_2\text{C}$ ), 27.3 (Me(6)), 43.4 ( $\text{CH}_2(5)$ ), 46.7 ( $\text{CH}(4)$ ), 61.5 ( $\text{OCH}_2\underline{\text{C}}\text{H}_3$ ), 79.2 ( $\text{Me}_2\underline{\text{C}}-\text{O}$ ), 83.3 (C(6)), 111.9 (C(3)=N), 119.4 ( $\text{CH}_{\text{Ar}}$ ), 128.7 ( $\text{CH}_{\text{Ar}}$ ), 133.2 ( $\text{C}_{\text{Ar}}$ ), 155.2 ( $\underline{\text{C}}_{\text{Ar}}-\text{O}$ ), 174.0 ( $\text{CO}_2$ ).

HRMS (ESI-TOF):  $m/z$   $[\text{M} + \text{H}]^+$  calcd. for  $\text{C}_{18}\text{H}_{25}^{79}\text{BrNO}_5$  414.0911; found: 414.0903.

### 3-Bromo-4-(3-methoxyphenyl)-6,6-dimethyl-5,6-dihydro-4H-1,2-oxazine 2-oxide 2g

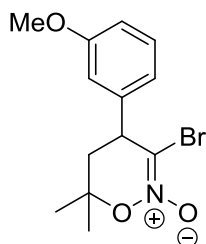

Prepared according to GP-2 from (*Z*)-1-(2-bromo-2-nitrovinyl)-3-methoxybenzene (50 mg, 0.19 mmol) and 2-methylpropene (300 mg, 5.4 mmol, 28 equiv.) in CH<sub>2</sub>Cl<sub>2</sub> (2.95 ml) using 1.2 equiv of SnCl<sub>4</sub>. The reaction was stirred at -78 °C for 60 min and then kept at the fridge (-30 °C) overnight (14 h). Column chromatography (eluent: PE/EtOAc, 5:1, then 1:1) afforded 40 mg (66%) of target compound as pale yellow solid.

R<sub>f</sub> = 0.51 (PE/EtOAc, 3:1, UV, anisaldehyde).

mp = 126-128 °C (PE/EtOAc, 5:1).

<sup>1</sup>H NMR (300 MHz, CDCl<sub>3</sub>): δ 1.46 (s, 3H, Me), 1.55 (s, 3H, Me), 2.16-2.31 (m, 2H, CH<sub>2</sub>(5)), 3.83 (s, 3H, OMe), 4.02 (dd, *J* = 10.6, 8.3 Hz, 1H, CH(4)), 6.74 (br s, 1H, CH<sub>Ar</sub>), 6.81 (br d, *J* = 7.6 Hz, 1H, CH<sub>Ar</sub>), 6.88 (dd, *J* = 8.2, 2.0 Hz, 1H, CH<sub>Ar</sub>), 7.31 (app t, *J* = 7.0 Hz, 1H, CH<sub>Ar</sub>).

<sup>13</sup>C NMR (75 MHz, DEPT, CDCl<sub>3</sub>): δ 22.2 (Me), 27.3 (Me), 43.3 (CH<sub>2</sub>(5)), 47.5 (CH(4)), 55.4 (OMe), 83.3 (C(6)), 110.3 (C(3)=N), 113.3 (CH<sub>Ar</sub>), 113.6 (CH<sub>Ar</sub>), 120.1 (CH<sub>Ar</sub>), 130.2 (CH<sub>Ar</sub>), 141.5 (C<sub>Ar</sub>), 160.1 (C<sub>Ar</sub>-OMe).

HRMS (ESI-TOF): *m/z* [M + H]<sup>+</sup> calcd. for C<sub>13</sub>H<sub>17</sub><sup>79</sup>BrNO<sub>3</sub> 314.0386; found: 314.0392.

### 3-Bromo-4-(2-methoxyphenyl)-6,6-dimethyl-5,6-dihydro-4H-1,2-oxazine 2-oxide 2h

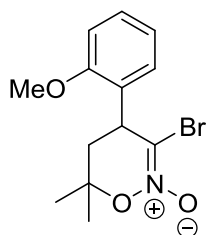

Prepared according to GP-2 from (*Z*)-1-(2-bromo-2-nitrovinyl)-2-methoxybenzene (200 mg, 0.78 mmol) and 2-methylpropene (217 mg, 3.9 mmol, 5 equiv.) in CH<sub>2</sub>Cl<sub>2</sub> (11.7 ml) using 1.2 equiv of SnCl<sub>4</sub>. The reaction was stirred at -78 °C for 60 min and then kept at the fridge (-30 °C) overnight (14 h). Column chromatography (eluent: PE/EtOAc, 3:1) afforded 203 mg (60%) of target compound as white solid.

R<sub>f</sub> = 0.51 (PE/EtOAc, 3:1, UV, anisaldehyde).

mp = 129-130 °C (dec.) (PE/EtOAc, 5:1).

$^1\text{H}$  NMR (300 MHz,  $\text{CDCl}_3$ ):  $\delta$  1.43 (s, 3H, Me), 1.55 (s, 3H, Me), 2.19 (d,  $J = 9.4$  Hz, 2H,  $\text{CH}_2(5)$ ), 3.86 (s, 3H, OMe), 4.36 (t,  $J = 9.4$  Hz, 1H, CH(4)), 6.93 (app d,  $J = 8.3$  Hz, 1H,  $\text{CH}_{\text{Ar}}$ ), 6.97 (app td,  $J = 7.5, 1.0$  Hz, 1H,  $\text{CH}_{\text{Ar}}$ ), 7.13 (dd,  $J = 7.5, 1.7$  Hz, 1H,  $\text{CH}_{\text{Ar}}$ ), 7.31 (app td,  $J = 8.3, 1.7$  Hz, 1H,  $\text{CH}_{\text{Ar}}$ ).

$^{13}\text{C}$  NMR (75 MHz, DEPT, HMBC,  $\text{CDCl}_3$ ):  $\delta$  22.2 (Me), 27.4 (Me), 40.7 ( $\text{CH}_2(5)$ ), 42.3 (CH(4)), 55.7 (OMe), 83.2 (C(6)), 111.2 ( $\text{CH}_{\text{Ar}}$  and C(3)=N), 121.1 ( $\text{CH}_{\text{Ar}}$ ), 127.9 ( $\text{C}_{\text{Ar}}$ ), 129.2 ( $\text{CH}_{\text{Ar}}$ ), 129.3 ( $\text{CH}_{\text{Ar}}$ ), 156.7 ( $\text{C}_{\text{Ar}}\text{-O}$ ).

HRMS (ESI-TOF):  $m/z$   $[\text{M} + \text{H}]^+$  calcd. for  $\text{C}_{13}\text{H}_{17}^{79}\text{BrNO}_3$  314.0386; found: 314.0388.

### 3-Bromo-6,6-dimethyl-4-(naphthalen-1-yl)-5,6-dihydro-4H-1,2-oxazine 2-oxide 2i

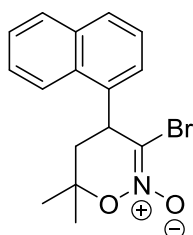

Prepared according to GP-2 from (*Z*)-1-(2-bromo-2-nitrovinyl)naphthalene (190 mg, 0.68 mmol) and 2-methylpropene (192 mg, 3.4 mmol, 5 equiv.) in  $\text{CH}_2\text{Cl}_2$  (10.3 ml) using 1.1 equiv of  $\text{SnCl}_4$ . The reaction was stirred at  $-78$  °C for 60 min, then additional portion of 2-methylpropene (192 mg, 3.4 mmol, 5 equiv.) was added. The resulting mixture was stirred for additional 90 min. Column chromatography (eluent: PE/EtOAc, 3:1, then 2:1) afforded 55 mg (24%) of target compound as pale yellow solid and 110 mg (58%) of starting nitroalkene.

$R_f = 0.38$  (PE/EtOAc, 3:1, UV, anisaldehyde).

mp =  $153\text{-}154$  °C (dec.) (PE/EtOAc, 5:1).

$^1\text{H}$  NMR (300 MHz,  $\text{CDCl}_3$ ):  $\delta$  1.47 (s, 3H, Me(6)), 1.66 (s, 3H, Me(6)), 2.40 (d,  $J = 9.4$  Hz, 2H,  $\text{CH}_2(5)$ ), 4.78 (t,  $J = 9.4$  Hz, 1H, CH(4)), 7.39 (app d,  $J = 7.1$  Hz, 1H,  $\text{CH}_{\text{Ar}}$ ), 7.46-7.61 (m, 3H,  $\text{CH}_{\text{Ar}}$ ), 7.86 (d,  $J = 8.1$  Hz, 1H,  $\text{CH}_{\text{Ar}}$ ), 7.91-7.95 (m, 2H,  $\text{CH}_{\text{Ar}}$ ).

$^{13}\text{C}$  NMR (75 MHz, DEPT, HSQC, HMBC,  $\text{CDCl}_3$ ):  $\delta$  22.5 (Me(6)), 27.5 (Me(6)), 42.0 ( $\text{CH}_2(5)$ ), 45.0 (br, CH(4)), 83.7 (C(6)), 111.1 (C(3)=N), 122.1 ( $\text{CH}_{\text{Ar}}$ ), 125.7 ( $\text{CH}_{\text{Ar}}$ ), 126.1 ( $\text{CH}_{\text{Ar}}$ ), 126.8 (br,  $\text{CH}_{\text{Ar}}$ ), 127.0 ( $\text{CH}_{\text{Ar}}$ ), 128.9 ( $\text{CH}_{\text{Ar}}$ ), 129.5 ( $\text{CH}_{\text{Ar}}$ ), 130.5 ( $\text{C}_{\text{Ar}}$ ), 134.3 ( $\text{C}_{\text{Ar}}$ ), 135.5 ( $\text{C}_{\text{Ar}}$ ).

HRMS (ESI-TOF):  $m/z$   $[\text{M} + \text{H}]^+$  calcd. for  $\text{C}_{16}\text{H}_{17}^{79}\text{BrNO}_2$  334.0437; found: 334.0425.

#### 4-(Benzo[d][1,3]dioxol-5-yl)-3-bromo-6,6-dimethyl-5,6-dihydro-4H-1,2-oxazine 2-oxide 2j

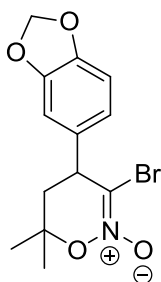

Starting bromonitroalkene was prepared according to the literature procedure.<sup>s8</sup>

Prepared according to GP-2 from (Z)-5-(2-bromo-2-nitrovinyl)benzo[d][1,3]dioxole (515 mg, 1.9 mmol) and 2-methylpropene (1.59 g, 28 mmol, 15 equiv.) in CH<sub>2</sub>Cl<sub>2</sub> (19 ml) using 1.1 equiv of SnCl<sub>4</sub>. The reaction was stirred at -50 °C for 90 min. Column chromatography (eluent: PE/EtOAc, 3:1, then 2:1) afforded 395 mg (64%) of target compound as pale yellow solid.

R<sub>f</sub> = 0.41 (PE/EtOAc, 2:1, UV, anisaldehyde).

mp = 135-136 °C (dec.) (PE/EtOAc, 2:1).

<sup>1</sup>H NMR (300 MHz, CDCl<sub>3</sub>): δ 1.44 (s, 3H, Me(6)), 1.52 (s, 3H, Me(6)), 2.12-2.28 (m, 2H, CH<sub>2</sub>(5)), 3.95 (dd, *J* = 10.8, 8.1 Hz, 1H, CH(4)), 5.98 (s, 2H, O-CH<sub>2</sub>-O), 6.66-6.69 (m, 2H, 2×CH<sub>Ar</sub>), 6.79 (d, *J* = 8.4 Hz, 1H, CH<sub>Ar</sub>).

<sup>13</sup>C NMR (75 MHz, DEPT, CDCl<sub>3</sub>): δ 22.2 (Me(6)), 27.3 (Me(6)), 43.4 (CH<sub>2</sub>(5)), 47.2 (CH(4)), 83.3 (C(6)), 101.4 (O-CH<sub>2</sub>-O), 108.0 (CH<sub>Ar</sub>), 108.6 (CH<sub>Ar</sub>), 110.7 (C(3)=N), 121.4 (CH<sub>Ar</sub>), 133.6 (C<sub>Ar</sub>), 147.4 (C<sub>Ar</sub>-O), 148.3 (C<sub>Ar</sub>-O).

HRMS (ESI-TOF): *m/z* [M + H]<sup>+</sup> calcd. for C<sub>13</sub>H<sub>15</sub><sup>79</sup>BrNO<sub>4</sub> 328.0179; found: 328.0178.

#### 3-Bromo-4-(2-bromo-4,5-dimethoxyphenyl)-6,6-dimethyl-5,6-dihydro-4H-1,2-oxazine 2-oxide 2k

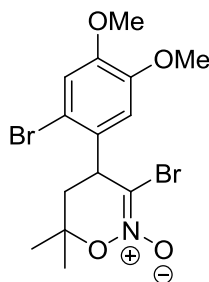

Prepared according to GP-2 from (Z)-1-bromo-2-(2-bromo-2-nitrovinyl)-4,5-dimethoxybenzene (185 mg, 0.50 mmol) and 2-methylpropene (283 mg, 5.0 mmol, 10 equiv.) in CH<sub>2</sub>Cl<sub>2</sub> (5.0 ml) using 1.1 equiv of SnCl<sub>4</sub>. The reaction was stirred at -78 °C for 30 min. Column chromatography (eluent: PE/EtOAc, 5:1 then 1:1) afforded 100 mg (47%) of target compound as pale yellow solid.

R<sub>f</sub> = 0.38 (PE/EtOAc, 3:1, UV, anisaldehyde).



mp = 152-153 °C (dec.) (PE/EtOAc, 5:1).

<sup>1</sup>H NMR (300 MHz, CDCl<sub>3</sub>): δ 1.45 (s, 3H, Me), 1.55 (s, 3H, Me), 2.06 (dd, *J* = 13.9, 10.9 Hz, 1H, CH<sub>2a</sub>(5)), 2.30 (dd, *J* = 13.9, 7.9 Hz, 1H, CH<sub>2b</sub>(5)), 3.86 (s, 3H, OMe), 3.87 (s, 3H, OMe), 4.50 (dd, *J* = 10.9, 7.9 Hz, 1H, CH(4)), 6.61 (s, 1H, CH<sub>Ar</sub>), 7.00 (s, 1H, CH<sub>Ar</sub>).

<sup>13</sup>C NMR (75 MHz, DEPT, CDCl<sub>3</sub>): δ 22.1 (Me), 27.3 (Me), 41.1 (CH<sub>2</sub>(5)), 46.7(CH(4)), 56.2 (OMe), 56.4 (OMe), 83.5 (C(6)), 109.8 (C(3)=N), 111.3 (CH<sub>Ar</sub>), 113.4 (C<sub>Ar</sub>-Br), 115.6 (CH<sub>Ar</sub>), 130.5 (C<sub>Ar</sub>), 149.3 (C<sub>Ar</sub>-OMe), 149.4 (C<sub>Ar</sub>-OMe).

HRMS (ESI-TOF): *m/z* [M + H]<sup>+</sup> calcd. for C<sub>14</sub>H<sub>18</sub><sup>79</sup>Br<sub>2</sub>NO<sub>4</sub> 423.9577; found: 423.9565.

### 3-Bromo-4-cyclopropyl-6,6-dimethyl-5,6-dihydro-4H-1,2-oxazine 2-oxide 2l

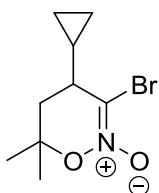

Prepared according to GP-2 from (Z)-(2-bromo-2-nitrovinyl)cyclopropane (136 mg, 0.71 mmol) and 2-methylpropene (200 mg, 3.5 mmol, 5 equiv.) in CH<sub>2</sub>Cl<sub>2</sub> (11 ml) using 1.2 equiv of SnCl<sub>4</sub>. The reaction was stirred at -78 °C for 3 h. Column chromatography (eluent: PE/EtOAc, 5:1, then 2:1) afforded 108 mg (52%) of target compound as white solid.

R<sub>f</sub> = 0.40 (PE/EtOAc, 3:1, UV, anisaldehyde).

mp = 81-82 °C

<sup>1</sup>H NMR (300 MHz, CDCl<sub>3</sub>): δ 0.10-0.19 (m, 1H), 0.46-0.64 (m, 2H), 0.73-0.90 (m, 2H), 1.36 (s, 3H, Me), 1.42 (s, 3H, Me), 1.94-2.07 (m, 3H, CH(4) and CH<sub>2</sub>(5)).

<sup>13</sup>C NMR (75 MHz, DEPT, CDCl<sub>3</sub>): δ 2.8 (CH<sub>2</sub>), 6.8 (CH<sub>2</sub>), 16.1 (CH), 22.9 (Me), 27.3 (Me), 40.1 (CH<sub>2</sub>(5)), 44.5 (CH(4)), 82.9 (C(6)), 112.1 (C(3)=N).

HRMS (ESI-TOF): *m/z* [M + H]<sup>+</sup> calcd. for C<sub>9</sub>H<sub>15</sub><sup>79</sup>BrNO<sub>2</sub> 248.0281; found: 248.0279.

### 3-Bromo-6,6-dimethyl-4-phenethyl-5,6-dihydro-4H-1,2-oxazine 2-oxide 2m

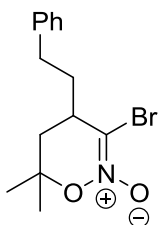

Starting bromonitroalkene was prepared according to the literature procedure.<sup>s8</sup>

Prepared according to GP-2 from (Z)-(4-bromo-4-nitrobut-3-en-1-yl)benzene (170 mg, 0.66 mmol) and 2-methylpropene (372 mg, 6.6 mmol, 10 equiv.) in CH<sub>2</sub>Cl<sub>2</sub> (10.1 ml) using 1.2

equiv of SnCl<sub>4</sub>. The reaction was stirred at -30 °C for 60 min and then kept at the fridge (-30 °C) for 72 h. Column chromatography (eluent: PE/EtOAc, 5:1, then 2:1) afforded 108 mg (52%) of target compound as colorless solid.

R<sub>f</sub> = 0.24 (PE/EtOAc, 3:1, UV, anisaldehyde).

mp = 90-92 °C.

<sup>1</sup>H NMR (300 MHz, CDCl<sub>3</sub>): δ 1.41 (s, 3H, Me), 1.45 (s, 3H, Me), 1.78-1.91 (m, 1H, PhCH<sub>2</sub>CH<sub>2a</sub>), 1.95 (dd, *J* = 13.5, 10.0 Hz, 1H, CH<sub>2a</sub>(5)), 2.08 (dd, *J* = 13.5, 7.9 Hz, 1H, CH<sub>2b</sub>(5)), 2.23 (dddd, *J* = 13.8, 10.3, 6.7, 3.4 Hz, 1H, PhCH<sub>2</sub>CH<sub>2b</sub>), 2.60 (ddd, *J* = 13.7, 10.1, 6.7 Hz, 1H, PhCH<sub>2a</sub>), 2.74 (ddd, *J* = 13.7, 10.5, 5.0 Hz, 1H, PhCH<sub>2b</sub>), 2.82-2.93 (m, 1H, CH(4)), 7.18-7.27 (m, 3H, CH<sub>Ph</sub>), 7.29-7.35 (m, 2H, CH<sub>Ph</sub>).

<sup>13</sup>C NMR (75 MHz, DEPT, CDCl<sub>3</sub>): δ 22.5 (Me), 27.4 (Me), 32.0 (CH<sub>2</sub>), 35.6 (CH<sub>2</sub>), 39.0 (CH<sub>2</sub>), 39.2 (CH(4)), 82.8 (C(6)), 112.4 (C(3)=N), 126.4 (CH<sub>Ph</sub>), 128.3 (CH<sub>Ph</sub>), 128.7 (CH<sub>Ph</sub>), 140.4 (C<sub>Ph</sub>).

HRMS (ESI-TOF): *m/z* [M + H]<sup>+</sup> calcd. for C<sub>14</sub>H<sub>19</sub><sup>79</sup>BrNO<sub>2</sub> 312.0594; found: 312.0590.

### 3-Chloro-4-(4-methoxyphenyl)-6,6-dimethyl-5,6-dihydro-4H-1,2-oxazine 2-oxide 2n

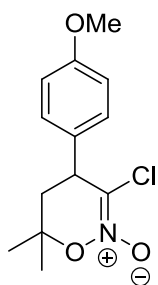

Starting chloronitroalkene was prepared according to the literature procedure.<sup>s3</sup>

Prepared according to GP-2 from (Z)-1-(2-chloro-2-nitrovinyl)-4-methoxybenzene (200 mg, 0.94 mmol) and 2-methylpropene (263 mg, 4.7 mmol, 5 equiv.) in CH<sub>2</sub>Cl<sub>2</sub> (14.2 ml) using 1.2 equiv of SnCl<sub>4</sub>. The reaction was stirred at -78 °C for 60 min and then kept at the fridge (-30 °C) overnight (14 h). Column chromatography (eluent: PE/EtOAc, 3:1, then 1:1) afforded 200 mg (79%) of target compound as white solid.

R<sub>f</sub> = 0.29 (PE/EtOAc, 2:1, UV, anisaldehyde).

mp = 148-150 °C (dec.)

<sup>1</sup>H NMR (300 MHz, CDCl<sub>3</sub>): δ 1.45 (s, 3H, Me), 1.53 (s, 3H, Me), 2.16 (dd, *J* = 13.9, 11.1 Hz, 1H, CH<sub>2a</sub>(5)), 2.27 (dd, *J* = 13.9, 8.0 Hz, 1H, CH<sub>2b</sub>(5)), 3.81 (s, 3H, OMe), 3.94 (dd, *J* = 11.1, 8.0 Hz, 1H, CH(4)), 6.90 (d, *J* = 8.7 Hz, 2H, CH<sub>Ar</sub>), 7.14 (d, *J* = 8.7 Hz, 2H, CH<sub>Ar</sub>).

<sup>13</sup>C NMR (75 MHz, DEPT, CDCl<sub>3</sub>) δ 22.1 (Me), 27.3 (Me), 43.3 (CH<sub>2</sub>(5)), 44.9 (CH(4)), 55.3 (OMe), 83.2 (C(6)), 114.6 (CH<sub>Ar</sub>), 119.8 (C(3)=N), 128.9 (CH<sub>Ar</sub>), 130.8 (C<sub>Ar</sub>), 159.3 (C<sub>Ar</sub>-OMe).

HRMS (ESI-TOF):  $m/z$   $[M + H]^+$  calcd. for  $C_{13}H_{17}ClNO_3$  270.0891; found: 270.0901.

### 3-Bromo-4-(4-methoxyphenyl)-6-phenyl-5,6-dihydro-4H-1,2-oxazine 2-oxide 2o

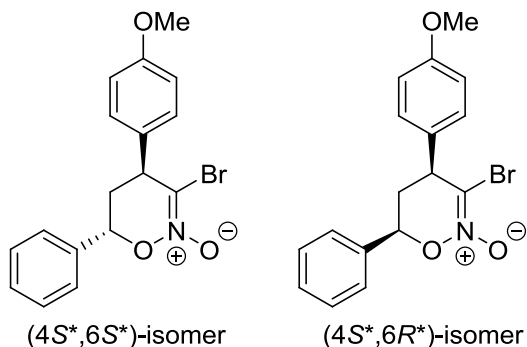

Starting bromonitroalkene was prepared according to the literature procedure.<sup>s2</sup>

Prepared according to GP-2 from (*Z*)-1-(2-bromo-2-nitrovinyl)-4-methoxybenzene (500 mg, 1.94 mmol) and styrene (404 mg, 444  $\mu$ l, 3.87 mmol, 2 equiv.) in toluene (12.3 ml) using 1.1 equiv of  $SnCl_4$ . The reaction was stirred at  $-50$  °C for 30 min and then kept at the fridge ( $-30$  °C) for 60 h. Recrystallisation from PE/EtOAc 3:1 afforded 386 mg (55%) of title compounds as pale yellow solid (dr (4*S*<sup>\*</sup>,6*S*<sup>\*</sup>) : (4*S*<sup>\*</sup>,6*R*<sup>\*</sup>) = 1.1:1). Column chromatography of mother liquor (eluent: PE/EtOAc, 5:1, then 3:1) afforded additional 120 mg (17%) of (4*S*<sup>\*</sup>,6*S*<sup>\*</sup>)-diastereomer as colorless oil. Total isolated: yield – 72%, dr – 1.7 : 1.

$R_f$  = 0.42 (PE/EtOAc, 3:1, UV, anisaldehyde).

mp (for diastereomeric mixture) = 119-121 °C (dec.) (PE/EtOAc, 3:1).

Relative configuration was assigned by analogy with literature data for corresponding 3-methyl-1,2-oxazine-N-oxide.<sup>s9</sup>

(4*S*<sup>\*</sup>,6*S*<sup>\*</sup>)-isomer:

$^1H$  NMR (300 MHz,  $CDCl_3$ ):  $\delta$  2.32 (app dt,  $J$  = 13.9, 2.6 Hz, 1H,  $CH_{2a}(5)$ ), 2.81 (ddd,  $J$  = 13.9, 10.3, 6.7 Hz, 1H,  $CH_{2b}(5)$ ), 3.85 (s, 3H, OMe), 4.21 (dd,  $J$  = 6.7, 3.0 Hz, 1H, CH(4)), 5.59 (dd,  $J$  = 10.3, 2.1 Hz, 1H, CH(6)–O), 6.97 (d,  $J$  = 8.7 Hz, 2H,  $CH_{Ar}$ ), 7.22 (d,  $J$  = 8.7 Hz, 2H,  $CH_{Ar}$ ), 7.33-7.41 (m, 5H,  $CH_{Ph}$ ).

$^{13}C$  NMR (75 MHz, DEPT,  $CDCl_3$ ):  $\delta$  36.6 ( $CH_2(5)$ ), 46.8 (CH(4)), 55.4 (OMe), 80.4 (CH(6)–O), 108.4 (C(3)=N), 114.7, 126.7, 128.87, 128.91, and 129.3 (all  $CH_{Ar}$  and  $CH_{Ph}$ ), 132.6 and 135.8 ( $C_{Ar}$  and  $C_{Ph}$ ), 159.3 ( $C_{Ar}$ –O).

(4*S*<sup>\*</sup>,6*R*<sup>\*</sup>)-isomer:

$^1H$  NMR (300 MHz,  $CDCl_3$ ):  $\delta$  2.53 (ddd,  $J$  = 14.1, 11.5, 10.5 Hz, 1H,  $CH_{2a}(5)$ ), 2.66 (ddd,  $J$  = 14.1, 8.1, 2.0 Hz, 1H,  $CH_{2b}(5)$ ), 3.83 (s, 3H, OMe), 4.25 (dd,  $J$  = 10.5, 8.1 Hz, 1H, CH(4)), 5.58 (app d,  $J$  = 11.0, 1H, CH(6)–O), 6.93 (d,  $J$  = 8.7 Hz, 2H,  $CH_{Ar}$ ), 7.19 (d,  $J$  = 8.7 Hz, 2H,  $CH_{Ar}$ ), 7.33-7.41 (m, 5H,  $CH_{Ph}$ ).

$^{13}\text{C}$  NMR (75 MHz, DEPT,  $\text{CDCl}_3$ ):  $\delta$  39.6 ( $\text{CH}_2(5)$ ), 48.8 ( $\text{CH}(4)$ ), 55.4 (OMe), 83.6 ( $\text{CH}(6)-\text{O}$ ), 111.8 ( $\text{C}(3)=\text{N}$ ), 114.6, 127.0, 128.8, 128.9, and 129.6 (all  $\text{CH}_{\text{Ar}}$  and  $\text{CH}_{\text{Ph}}$ ), 132.1 and 135.5 ( $\text{C}_{\text{Ar}}$  and  $\text{C}_{\text{Ph}}$ ), 159.4 ( $\text{C}_{\text{Ar}}-\text{O}$ ).

HRMS (ESI-TOF):  $m/z$   $[\text{M} + \text{H}]^+$  calcd. for  $\text{C}_{17}\text{H}_{17}^{79}\text{BrNO}_3$  362.0386; found: 362.0377.

**(4*S*\*,4*aR*\*,7*aR*\*)-3-Bromo-4-(4-methoxyphenyl)-4,4*a*,5,6,7,7*a*-hexahydrocyclopenta[e][1,2]oxazine 2-oxide 2p**

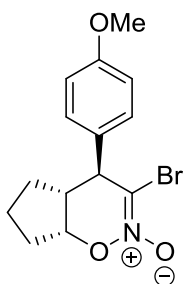

Starting bromonitroalkene was prepared according to the literature procedure.<sup>s2</sup>

Prepared according to GP-2 from (Z)-1-(2-bromo-2-nitrovinyl)-4-methoxybenzene (516 mg, 2.0 mmol) and cyclopentene (0.68 g, 0.88 mL, 10.0 mmol, 5 equiv.) in  $\text{CH}_2\text{Cl}_2$  (20 ml) using 1.2 equiv of  $\text{SnCl}_4$ . The reaction was stirred at  $-30\text{ }^\circ\text{C}$  for 60 min and then kept in the fridge ( $-30\text{ }^\circ\text{C}$ ) overnight (14 h). Recrystallization (hexane–EtOAc, 3:1) afforded 604 mg (93%) of title compound as pale yellow crystals.

$R_f = 0.24$  (PE/EtOAc, 3:1, UV, anisaldehyde).

mp =  $113\text{--}114\text{ }^\circ\text{C}$  (dec.) (PE/EtOAc, 3:1).

$^1\text{H}$  NMR (300 MHz,  $\text{CDCl}_3$ ):  $\delta$  1.58–1.75 (m, 2H,  $\text{CH}_2$ ), 1.86–2.07 (m, 4H,  $\text{CH}_2$ ), 2.57–2.65 (m, 1H, CH), 3.83 (s, 3H, OMe), 3.90 (d,  $J = 5.3$  Hz, 1H,  $\text{CH}-\text{Ar}$ ), 5.05 (app td,  $J = 5.2, 2.4$  Hz, 1H,  $\text{CH}-\text{O}$ ), 6.92 (d  $J = 8.7$  Hz, 2H,  $\text{CH}_{\text{Ar}}$ ), 7.16 (d,  $J = 8.7$  Hz,  $\text{CH}_{\text{Ar}}$ ).

$^{13}\text{C}$  NMR (75 MHz, DEPT,  $\text{CDCl}_3$ ):  $\delta$  22.6 ( $\text{CH}_2$ ), 30.5 ( $\text{CH}_2$ ), 31.9 ( $\text{CH}_2$ ), 48.9 (CH), 51.2 (CH), 55.3 (OMe), 86.4 ( $\text{CH}-\text{O}$ ), 112.2 ( $\text{C}(3)=\text{N}$ ), 114.4 ( $\text{CH}_{\text{Ar}}$ ), 129.4 ( $\text{CH}_{\text{Ar}}$ ), 131.8 ( $\text{C}_{\text{Ar}}$ ), 159.3 ( $\text{C}_{\text{Ar}}-\text{O}$ ).

HRMS (ESI-TOF):  $m/z$   $[\text{M} + \text{H}]^+$  calcd. for  $\text{C}_{14}\text{H}_{17}^{79}\text{BrNO}_3$  326.0386; found: 326.0384.

**(4*S*\*,4*aR*\*,8*aR*\*)-3-bromo-4-(4-methoxyphenyl)-4*a*,5,6,7,8,8*a*-hexahydro-4*H*-benzo[*e*][1,2]oxazine 2-oxide 2q**

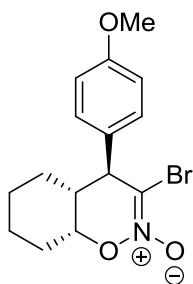

Starting bromonitroalkene was prepared according to the literature procedure.<sup>s2</sup>

Prepared according to GP-2 from (*Z*)-1-(2-bromo-2-nitrovinyl)-4-methoxybenzene (516 mg, 2.0 mmol) and cyclohexene (0.41 mL, 328 mg, 4.0 mmol, 2 equiv.) in CH<sub>2</sub>Cl<sub>2</sub> (20 ml) using 1.2 equiv of SnCl<sub>4</sub>. The reaction was stirred at -30 °C for 60 min and then kept at the fridge (-30 °C) for 7 days. Column chromatography (eluent: PE/EtOAc, 5:1, then 2:1) afforded 303 mg (45%) of target compound as pale yellow solid.

NMR matched previously reported data.<sup>s2</sup>

**General procedure for reaction of aryne precursors 1 and *N*-oxides 2. Synthesis of vinyl benzisoxazoles 3 and benzofurooxazines 4 (GP-3):**

CsF (145 mg, 0.95 mmol, 3.0 equiv) was placed in a Schlenk tube and dried at ~250 °C (heat gun) in a vacuum (1-2 mmHg) for ~1 min. After cooling to r.t., nitronate **2** (0.32 mmol, 1.0 equiv) and anhydrous acetonitrile (2.56 mL) were added under an argon atmosphere (if nitronate was an oil, it was added to dry CsF as 0.125 M solution in MeCN). After dissolution of nitronate **2**, aryne precursor **1** (0.48 mmol, 1.5 equiv) was added and the reaction mixture was stirred for 12-16 h (TLC control). Then, EtOAc (~2 mL) and water (~4 mL) were added upon vigorous stirring. After ~1 min, the mixture was transferred into a separating funnel containing EtOAc (15 mL) and water (15 mL). The organic phase was separated, and the aqueous phase was extracted with EtOAc (3 × 15 mL). The combined organic phases were washed with brine (30 mL), dried with anhydrous Na<sub>2</sub>SO<sub>4</sub>, and concentrated under reduced pressure. The resulting crude product was subjected to column chromatography on silica gel (PE/ EtOAc gradient).

### 3-(1-(4-Methoxyphenyl)vinyl)benzo[d]isoxazole **3aa**

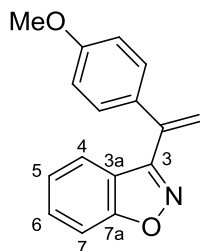

1. Prepared from 3-bromonitronate **2a** (200 mg, 0.64 mmol) and silane **1a** (232  $\mu$ L, 285 mg, 0.96 mmol) according to the GP-3. Column chromatography (eluent: PE/EtOAc, 30:1) afforded 150 mg (94%) of title compound as colorless oil.
2. Scale up reaction was performed for 3-bromonitronate **2a** (1.26 g, 4.0 mmol) and silane **1a** (1.46 mL, 1.79 g, 6.0 mmol) according to the general procedure. Column chromatography (eluent: PE, then PE/EtOAc, 20:1, then 15:1) afforded 776 mg (77%) of title compound as white solid and 182 mg of the mixture of title compound and 3-(6-methoxy-9,10-dihydrophenanthren-9-yl)benzo[d]isoxazole **12** (molar ratio 5:1). Recrystallization of this mixture from PE/MTBE 1:1 afforded 110 mg of pure title compound as white crystals. Total yield 886 mg (88%).
3. Prepared from 3-chloronitronate **2n** (20 mg, 0.07 mmol) and silane **1a** (27  $\mu$ L, 33 mg, 0.11 mmol) according to the GP-3. Column chromatography (eluent: PE/EtOAc, 10:1) afforded 14 mg (75%) of title compound as colorless oil.
4. Prepared from 3-bromonitronate **2o** (100 mg, 0.28 mmol) (dr (4*S*\*,6*S*\*) : (4*S*\*,6*R*\*) = 1.1:1) and silane **1a** (101  $\mu$ L, 124 mg, 0.41 mmol) according to the GP-3. Column chromatography (eluent: PE/EtOAc, 10:1, then 1:1) afforded 44 mg (64%) of title compound as colorless oil and 23 mg (23%) of starting nitronate.

$R_f$  = 0.66 (PE/EtOAc, 5:1, UV, anisaldehyde).

mp = 53-54  $^{\circ}$ C (PE/MTBE, 1:1).

$^1\text{H}$  NMR (300 MHz,  $\text{CDCl}_3$ ):  $\delta$  3.86 (s, 3H, OMe), 5.88 (d,  $J$  = 0.8 Hz, 1H, =CH<sub>2a</sub>), 5.91 (d,  $J$  = 0.8 Hz, 1H, =CH<sub>2b</sub>), 6.93 (d,  $J$  = 8.9 Hz, 2H, CH<sub>Ar</sub>), 7.24 (ddd,  $J$  = 7.9, 6.9, 0.9 Hz, 1H, CH(5)), 7.35 (app d,  $J$  = 7.9 Hz, 1H, CH(4)), 7.41 (d,  $J$  = 8.9 Hz, 2H, CH<sub>Ar</sub>), 7.56 (ddd,  $J$  = 8.4, 6.9, 1.2 Hz, 1H, CH(6)), 7.64 (app d,  $J$  = 8.4 Hz, 1H, CH(7)).

$^{13}\text{C}$  NMR (75 MHz, DEPT,  $\text{CDCl}_3$ ):  $\delta$  55.3 (OMe), 110.0 (CH(7)), 113.9 (CH<sub>Ar</sub>), 118.5 (=CH<sub>2</sub>), 121.2 (C(3a)), 122.7 (CH(4)), 123.5 (CH(5)), 128.9 (CH<sub>Ar</sub>), 129.7 (CH(6)), 130.6 (C<sub>Ar</sub>), 137.1 (C=C), 158.2 (C(3)=N), 160.0 (C<sub>Ar</sub>-OMe), 163.4 (C<sub>Ar</sub>(7a)-O).

HRMS (ESI-TOF):  $m/z$  [M + H]<sup>+</sup> calcd. for C<sub>16</sub>H<sub>14</sub>NO<sub>2</sub> 252.1019; found: 252.1025.

### 3-(1-(4-Bromophenyl)vinyl)benzo[d]isoxazole **3ab**

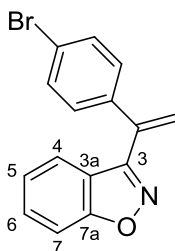

Prepared from 3-bromonitronate **2b** (100 mg, 0.28 mmol) and silane **1a** (100  $\mu$ L, 123 mg, 0.41 mmol) according to the GP-3. Column chromatography (eluent: PE/EtOAc, 50:1) afforded 78 mg (94%) of title compound as pale yellow solid.

$R_f$  = 0.58 (PE/EtOAc, 20:1, UV, anisaldehyde).

mp = 68-69  $^{\circ}$ C (PE/EtOAc, 3:1).

$^1\text{H}$  NMR (300 MHz,  $\text{CDCl}_3$ ):  $\delta$  5.97 (s, 1H, =CH<sub>2a</sub>(8)), 6.05 (s, 1H, =CH<sub>2b</sub>(8)), 7.27 (app t,  $J$  = 7.4 Hz, 1H, CH(5)), 7.35-7.38 (m, 3H, CH(4) and CH<sub>Ar</sub>), 7.53 (d,  $J$  = 8.5 Hz, 2H, CH<sub>Ar</sub>), 7.55-7.60 (m, CH(6)), 7.65 (app d,  $J$  = 8.4 Hz, 1H, CH(7)).

$^{13}\text{C}$  NMR (75 MHz, DEPT, HSQC, HMBC,  $\text{CDCl}_3$ ):  $\delta$  110.1 (CH(7)), 120.75 (=CH<sub>2</sub>), 120.83 (C(3a)), 122.4 (CH(4)), 122.9 (C-Br), 123.8 (CH(5)), 129.3 (CH<sub>Ar</sub>), 129.9 (CH(6)), 131.7 (CH<sub>Ar</sub>), 136.9 and 137.1 (C<sub>Ar</sub> and  $\underline{\text{C}}=\text{CH}_2$ ), 157.4 (C(3)=N), 163.5 (C<sub>Ar</sub>(7a)-O).

HRMS (ESI-TOF):  $m/z$  [M + H]<sup>+</sup> calcd. for C<sub>15</sub>H<sub>11</sub><sup>79</sup>BrNO 300.0019; found: 300.0015.

### 3-(1-(4-Chlorophenyl)vinyl)benzo[d]isoxazole **3ac**

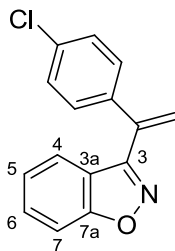

Prepared from 3-bromonitronate **3c** (73 mg, 0.23 mmol) and silane **1a** (84  $\mu$ L, 103 mg, 0.34 mmol) according to the GP-3. Column chromatography (eluent: PE/EtOAc, 15:1, then 10:1) afforded 56 mg (96%) of title compound as white solid.

$R_f$  = 0.65 (PE/EtOAc, 5:1, UV, anisaldehyde).

mp = 82-84 $^{\circ}$ C (dec.) (PE/EtOAc, 5:1).

$^1\text{H}$  NMR (300 MHz,  $\text{CDCl}_3$ ):  $\delta$  5.96 (s, 1H, =CH<sub>2a</sub>), 6.05 (s, 1H, =CH<sub>2b</sub>), 7.25-7.30 (m, 1H, CH(5)), 7.37 (d,  $J$  = 8.7 Hz, 2H), 7.39-7.45 (m, 3H, CH<sub>Ar</sub> and CH(4)), 7.55-7.60 (m, 1H, CH(6)), 7.65 (app d,  $J$  = 8.5 Hz, 1H, CH(7)).

$^{13}\text{C}$  NMR (75 MHz, DEPT, HSQC,  $\text{CDCl}_3$ ):  $\delta$  110.1 (CH(7)), 120.7 (=CH<sub>2</sub>), 120.9 (C(3a)), 122.4 (CH(4)), 123.7 (CH(5)), 128.8 (CH<sub>Ar</sub>), 129.0 (CH<sub>Ar</sub>), 129.9 (CH(6)), 134.7, 136.6, and 136.9 (C<sub>Ar</sub>, C–Cl and C=CH<sub>2</sub>), 157.5 (C(3)=N), 163.5 (C<sub>Ar</sub>(7a)–O).

HRMS (ESI-TOF):  $m/z$  [M + H]<sup>+</sup> calcd. for C<sub>15</sub>H<sub>11</sub>ClNO 256.0524; found: 256.0526.

The crystallographic information for compound **3ac** was deposited in the Cambridge Crystallographic Data Centre (CCDC 2337550).

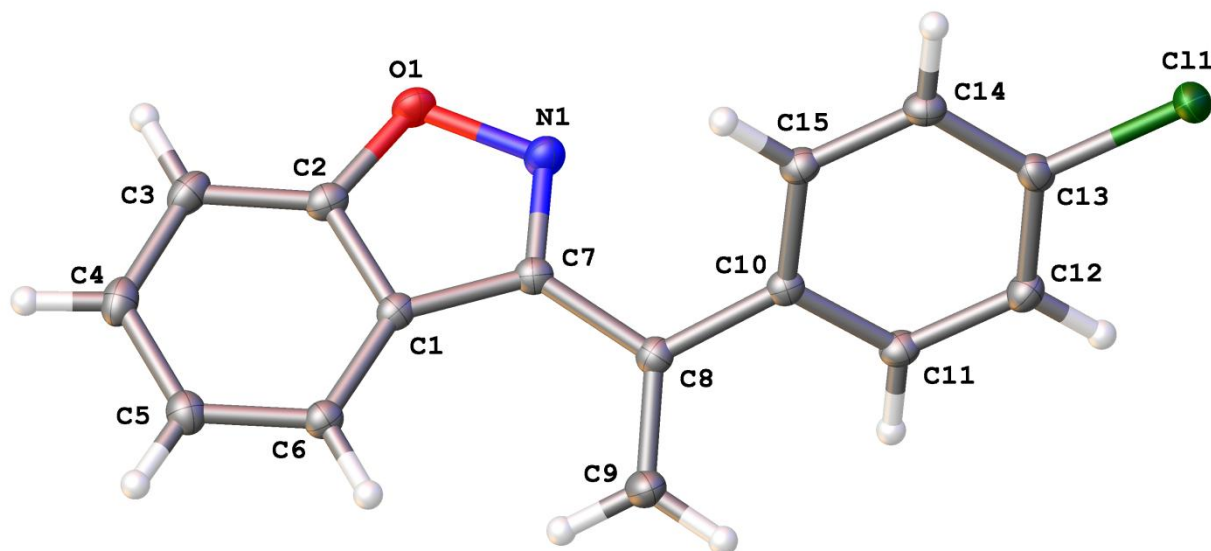

General view of benzisoxazole **3ac** in representation of atoms *via* thermal ellipsoids at 50% probability level.

### 3-(1-(4-Fluorophenyl)vinyl)benzo[d]isoxazole **3ad**

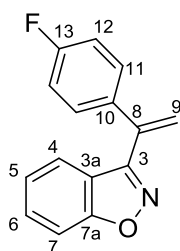

Prepared from 3-bromonitronate **2d** (100 mg, 0.33 mmol) and silane **1a** (121  $\mu\text{L}$ , 148 mg, 0.50 mmol) according to the GP-3. Column chromatography (eluent: PE, then PE/EtOAc, 10:1) afforded 99 mg (78%) of title compound as white solid.

$R_f$  = 0.63 (PE/EtOAc, 10:1, UV, anisaldehyde).

mp = 81-82 °C (PE/EtOAc, 5:1).

$^1\text{H}$  NMR (300 MHz,  $\text{CDCl}_3$ ):  $\delta$  5.93 (s, 1H, =CH<sub>2a</sub>), 6.02 (s, 1H, =CH<sub>2b</sub>), 7.10 (t,  $J$  = 8.7 Hz, 2H, CH<sub>Ar</sub>), 7.27 (app td,  $J$  = 6.8, 0.9 Hz, 1H, CH(5)), 7.37 (app d,  $J$  = 8.0 Hz, 1H, CH(4)), 7.47 (dd,  $J$



= 8.8, 5.3 Hz, 2H, CH<sub>Ar</sub>), 7.57 (app td,  $J = 6.8, 1.2$  Hz, 1H, CH(6)), 7.65 (app d,  $J = 8.5$  Hz, 1H, CH(7)).

<sup>13</sup>C NMR (75 MHz, DEPT, CDCl<sub>3</sub>):  $\delta$  110.1 (CH(7)), 115.5 (d,  $^2J_{CF} = 21.7$  Hz, CH<sub>Ar</sub>), 120.2 (=CH<sub>2</sub>), 120.9 (C(3a)), 122.4 (CH(4)), 123.7 (CH(5)), 129.5 (d,  $^3J_{CF} = 8.2$  Hz, CH<sub>Ar</sub>), 129.9 (CH(6)), 134.3 (d,  $^4J_{CF} = 3.4$  Hz, C<sub>Ar</sub>), 136.9 (C=C=CH<sub>2</sub>), 157.7 (C(3)=N), 163.0 (d,  $^1J_{CF} = 248.3$  Hz, C–F), 163.5 (C<sub>Ar</sub>(7a)–O).

<sup>19</sup>F NMR (282 MHz, CDCl<sub>3</sub>):  $\delta$  -113.1 (tt,  $J = 8.5, 5.3$  Hz).

HRMS (ESI-TOF):  $m/z$  [M + H]<sup>+</sup> calcd. for C<sub>15</sub>H<sub>11</sub>FNO 240.0819; found: 240.0822.

### 3-(1-(*p*-Tolyl)vinyl)benzo[d]isoxazole **3ae**

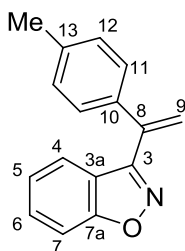

Prepared from 3-bromonitronate **2e** (100 mg, 0.34 mmol) and silane **1a** (122  $\mu$ L, 150 mg, 0.50 mmol) according to the GP-3. Column chromatography (eluent: PE, then PE/EtOAc, 50:1) afforded 71 mg (90%) of title compound as colorless oil.

$R_f = 0.75$  (PE/EtOAc, 20:1, UV, anisaldehyde).

<sup>1</sup>H NMR (300 MHz, COSY, CDCl<sub>3</sub>):  $\delta$  2.42 (s, 3H, Me), 5.93 (d,  $J = 0.8$  Hz, 1H, =CH<sub>2a</sub>), 5.98 (d,  $J = 0.8$  Hz, 1H, =CH<sub>2b</sub>), 7.20-7.24 (m, 2H, CH(11 or 12)), 7.25-7.28 (m, 1H, CH(5)), 7.34 (app d,  $J = 8.0$  Hz, 1H, CH(4)), 7.38 (d,  $J = 8.2$  Hz, 2H, CH(12 or 11)), 7.56 (ddd,  $J = 8.4, 6.8, 1.2$  Hz, 1H, CH(6)), 7.64 (app d,  $J = 8.5$  Hz, 1H, CH(7)).

<sup>13</sup>C NMR (75 MHz, DEPT, HSQC, CDCl<sub>3</sub>):  $\delta$  21.3 (Me), 110.0 (CH(7)), 119.4 (=CH<sub>2</sub>(9)), 121.2 (C(3a)), 122.7 (CH(4)), 123.5 (CH(5)), 127.5 and 129.3 (CH<sub>Ar</sub>(11) and CH<sub>Ar</sub>(12)), 129.7 (CH(6)), 135.3, 137.6 and 138.6 (C<sub>Ar</sub>(10), C<sub>Ar</sub>(13), and C=C=CH<sub>2</sub>), 158.1 (C(3)=N), 163.5 (C<sub>Ar</sub>(7a)–O).

HRMS (ESI-TOF):  $m/z$  [M + H]<sup>+</sup> calcd. for C<sub>16</sub>H<sub>14</sub>NO 236.1070; found: 236.1078.

### Ethyl 2-(4-(1-(benzo[d]isoxazol-3-yl)vinyl)phenoxy)-2-methylpropanoate **3af**

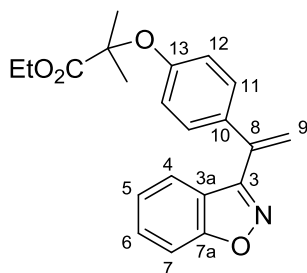

Prepared from 3-bromonitronate **2f** (100 mg, 0.24 mmol) and silane **1a** (88  $\mu$ L, 108 mg, 0.36 mmol) according to the GP-3. Column chromatography (eluent: PE/EtOAc, 20:1, then 10:1) afforded 81 mg (96%) of title compound as colorless oil.

$R_f$  = 0.66 (PE/EtOAc, 5:1, UV, anisaldehyde).

$^1\text{H}$  NMR (300 MHz,  $\text{CDCl}_3$ ):  $\delta$  1.27 (t,  $J$  = 7.1 Hz, 3H,  $\text{CH}_2\text{CH}_3$ ), 1.85 (s, 6H,  $\text{Me}_2\text{C}$ ), 4.26 (q,  $J$  = 7.1 Hz, 2H,  $\text{OCH}_2\text{CH}_3$ ), 5.88 (s, 1H,  $=\text{CH}_{2a}(8)$ ), 5.91 (s, 1H,  $=\text{CH}_{2b}(8)$ ), 6.85 (d,  $J$  = 8.8 Hz, 2H,  $\text{CH}_{\text{Ar}}(12)$ ), 7.22 (app t,  $J$  = 7.4 Hz, 1H, CH(5)), 7.32 (app d,  $J$  = 8.0 Hz, 1H, CH(4)), 7.36 (d,  $J$  = 8.8 Hz, 2H,  $\text{CH}_{\text{Ar}}(11)$ ), 7.54 (app td,  $J$  = 6.9, 1.1 Hz, 1H, CH(6)), 7.62 (app d,  $J$  = 8.4 Hz, 1H, CH(7)).

$^{13}\text{C}$  NMR (75 MHz, DEPT, HSQC, HMBC,  $\text{CDCl}_3$ ):  $\delta$  14.1 ( $\text{CH}_2\text{CH}_3$ ), 25.4 ( $\text{Me}_2\text{C}$ ), 61.5 ( $\text{OCH}_2\text{CH}_3$ ), 79.2 ( $\text{Me}_2\text{C}-\text{O}$ ), 110.0 (CH(7)), 118.7 ( $\text{CH}_{\text{Ar}}(12)$ ), 118.9 ( $=\text{CH}_2(9)$ ), 121.2 (C(3a)), 122.6 (CH(4)), 123.5 (CH(5)), 128.5 ( $\text{CH}_{\text{Ar}}(11)$ ), 129.7 (CH(6)), 131.7 ( $\text{C}_{\text{Ar}}(10)$ ), 137.0 ( $\text{C}(8)=\text{CH}_2$ ), 156.0 ( $\text{C}_{\text{Ar}}(13)-\text{O}$ ), 158.1 (C(3)=N), 163.4 ( $\text{C}_{\text{Ar}}(7a)-\text{O}$ ), 174.1 ( $\text{CO}_2$ ).

HRMS (ESI-TOF):  $m/z$   $[\text{M} + \text{H}]^+$  calcd. for  $\text{C}_{21}\text{H}_{22}\text{NO}_4$  352.1543; found: 352.1539.

### 3-(1-(3-Methoxyphenyl)vinyl)benzo[d]isoxazole **3ag**

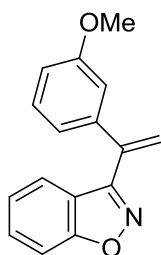

Prepared from 3-bromonitronate **2g** (35 mg, 0.11 mmol) and silane **1a** (41  $\mu$ L, 50 mg, 0.17 mmol) according to the GP-3. Column chromatography (eluent: PE, then PE/EtOAc, 10:1) afforded 27 mg (96%) of title compound as colorless oil, that solidified upon storage in a fridge.

$R_f$  = 0.66 (PE/EtOAc, 10:1, UV, anisaldehyde).

mp = 70-72  $^\circ\text{C}$  (PE/EtOAc, 3:1).

$^1\text{H}$  NMR (300 MHz,  $\text{CDCl}_3$ ):  $\delta$  3.82 (s, 3H, OMe), 5.96 (d,  $J$  = 0.7 Hz, 1H,  $=\text{CH}_{2a}$ ), 6.02 (d,  $J$  = 0.7 Hz, 1H,  $=\text{CH}_{2b}$ ), 6.96 (ddd,  $J$  = 8.2, 2.5, 0.8 Hz, 1H), 7.02-7.07 (m, 2H), 7.24 (app td,  $J$  = 7.4,

0.9 Hz, 1H), 7.32 (app t,  $J = 8.0$  Hz, 1H), 7.56 (ddd,  $J = 8.4, 6.8, 1.3$  Hz, 1H), 7.59 (app d,  $J = 8.5$  Hz, 1H).

$^{13}\text{C}$  NMR (75 MHz, DEPT,  $\text{CDCl}_3$ ):  $\delta$  55.3 (OMe), 110.0 (CH), 113.3 (CH), 114.2 (CH), 120.2 (CH), 120.4 ( $=\text{CH}_2$ ), 121.1 (C), 122.6 (CH), 123.6 (CH), 129.6 (CH), 129.8 (CH), 137.7 and 139.5 ( $\text{C}_{\text{Ar}}$  and  $\underline{\text{C}}=\text{CH}_2$ ), 157.9 (C(3)=N), 159.7 ( $\underline{\text{C}}_{\text{Ar}}\text{-OMe}$ ), 163.5 ( $\text{C}_{\text{Ar}}(7\text{a})\text{-O}$ ).

HRMS (ESI-TOF):  $m/z$   $[\text{M} + \text{H}]^+$  calcd. for  $\text{C}_{16}\text{H}_{14}\text{NO}_2$  252.1019; found: 252.1018.

### 3-(1-(2-Methoxyphenyl)vinyl)benzo[d]isoxazole 3ah

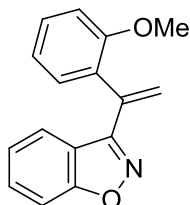

Prepared from 3-bromonitronate **2h** (70 mg, 0.22 mmol) and silane **1a** (81  $\mu\text{L}$ , 100 mg, 0.33 mmol) according to the GP-3. Column chromatography (eluent: PE/EtOAc, 20:1, then 10:1) afforded 52 mg (93%) of title compound as white solid.

$R_f = 0.78$  (PE/EtOAc, 3:1, UV, anisaldehyde).

mp = 67-69  $^\circ\text{C}$  (PE/EtOAc, 3:1).

$^1\text{H}$  NMR (300 MHz,  $\text{CDCl}_3$ ):  $\delta$  3.56 (s, 3H, OMe), 5.82 (d,  $J = 1.2$  Hz, 1H,  $=\text{CH}_{2\text{a}}$ ), 6.23 (d,  $J = 1.2$  Hz, 1H,  $=\text{CH}_{2\text{b}}$ ), 6.93 (d,  $J = 8.0$  Hz, 1H), 7.07 (app t,  $J = 7.5$  Hz, 1H), 7.16-7.25 (m, 2H), 7.39-7.46 (m, 2H), 7.51 (app td,  $J = 6.5, 1.6$  Hz, 1H), 7.59 (app d,  $J = 8.4$  Hz, 1H).

$^{13}\text{C}$  NMR (75 MHz, DEPT,  $\text{CDCl}_3$ ):  $\delta$  55.5 (OMe), 109.8 (CH), 111.3 (CH), 120.9 (CH), 121.0 (C), 121.7 ( $=\text{CH}_2$ ), 122.1 (CH), 123.3 (CH), 128.3 (C), 129.3 (CH), 130.1 (CH), 130.6 (CH), 135.9 ( $\underline{\text{C}}=\text{CH}_2$ ), 157.2 (C(3)=N), 158.1 ( $\underline{\text{C}}_{\text{Ar}}\text{-OMe}$ ), 163.3 ( $\text{C}_{\text{Ar}}(7\text{a})\text{-O}$ ).

HRMS (ESI-TOF):  $m/z$   $[\text{M} + \text{H}]^+$  calcd. for  $\text{C}_{16}\text{H}_{14}\text{NO}_2$  252.1019; found: 252.1024.

### 3-(1-(Naphthalen-1-yl)vinyl)benzo[d]isoxazole 3ai

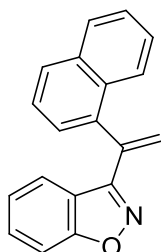

Prepared from 3-bromonitronate **2i** (50 mg, 0.15 mmol) and silane **1a** (55  $\mu\text{L}$ , 67 mg, 0.22 mmol) according to the GP-3. Column chromatography (eluent: PE, then PE/EtOAc, 50:1) afforded 35 mg (86%) of title compound as colorless oil.

$R_f = 0.60$  (PE/EtOAc, 10:1, UV, anisaldehyde).

$^1\text{H}$  NMR (300 MHz,  $\text{CDCl}_3$ ):  $\delta$  5.90 (d,  $J = 1.3$  Hz, 1H,  $=\text{CH}_{2a}$ ), 6.57 (d,  $J = 1.3$  Hz, 1H,  $=\text{CH}_{2b}$ ), 7.06-7.15 (m, 2H), 7.39 (ddd,  $J = 8.2, 6.9, 1.3$  Hz, 1H), 7.46-7.51 (m, 2H), 7.55-7.63 (m, 3H), 7.88-7.97 (m, 3H).

$^{13}\text{C}$  NMR (75 MHz, DEPT,  $\text{CDCl}_3$ ):  $\delta$  110.0 (CH(7)), 120.4 (C(3a)), 122.2 (CH), 123.3 ( $=\text{CH}_2$ ), 123.7 (CH), 125.4 (CH), 125.5 (CH), 126.1 (CH), 126.5 (CH), 127.3 (CH), 128.5 (CH), 129.0 (CH), 129.6 (CH), 131.6 (C), 133.7 (C), 137.0 (C), 137.5 (C), 158.0 (C(3)=N), 163.7 ( $\text{C}_{\text{Ar}}(7a)\text{-O}$ ).

HRMS (ESI-TOF):  $m/z$   $[\text{M} + \text{H}]^+$  calcd. for  $\text{C}_{19}\text{H}_{14}\text{NO}$  272.1070; found: 272.1075.

### 3-(1-(Benzo[d][1,3]dioxol-5-yl)vinyl)benzo[d]isoxazole 3aj

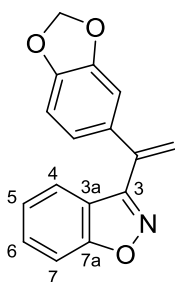

Prepared from 3-bromonitronate **2j** (100 mg, 0.31 mmol) and silane **1a** (111  $\mu\text{L}$ , 136 mg, 0.46 mmol) according to the GP-3. Column chromatography (eluent: PE/EtOAc, 20:1) afforded 62 mg (77%) of title compound as white solid.

$R_f = 0.70$  (PE/EtOAc, 5:1, UV, anisaldehyde).

mp = 82-84  $^\circ\text{C}$  (PE/EtOAc, 3:1).

$^1\text{H}$  NMR (300 MHz,  $\text{CDCl}_3$ ):  $\delta$  5.86 (s, 1H,  $=\text{CH}_{2a}(8)$ ), 5.91 (s, 1H,  $=\text{CH}_{2b}(8)$ ), 6.01 (s, 2H,  $\text{O-CH}_2\text{-O}$ ), 6.82 (d,  $J = 8.0$  Hz, 1H,  $\text{CH}_{\text{Ar}}$ ), 6.93-6.98 (m, 2H,  $2 \times \text{CH}_{\text{Ar}}$ ), 7.26 (app t,  $J = 7.4$  Hz, 1H, CH(5)), 7.39 (app d,  $J = 7.9$  Hz, 1H, CH(4)), 7.56 (app t,  $J = 7.6$  Hz, 1H, CH(6)), 7.63 (app d,  $J = 8.4$  Hz, 1H, CH(7)).

$^{13}\text{C}$  NMR (75 MHz, DEPT,  $\text{CDCl}_3$ ):  $\delta$  101.3 ( $\text{O-CH}_2\text{-O}$ ), 108.0 ( $\text{CH}_{\text{Ar}}$ ), 108.3 ( $\text{CH}_{\text{Ar}}$ ), 110.0 (CH(7)), 119.1 ( $=\text{CH}_2$ ), 121.1 (C(3a)), 121.7 ( $\text{CH}_{\text{Ar}}$ ), 122.6 (CH(4)), 123.6 (CH(5)), 129.8 (CH(6)), 132.3 ( $\text{C}_{\text{Ar}}$ ), 137.3 ( $\underline{\text{C}}=\text{CH}_2$ ), 147.9 ( $\text{C}_{\text{Ar}}\text{-O}$ ), 148.1 ( $\text{C}_{\text{Ar}}\text{-O}$ ), 158.1 (C(3)=N), 163.5 ( $\text{C}_{\text{Ar}}(7a)\text{-O}$ ).

HRMS (ESI-TOF):  $m/z$   $[\text{M} + \text{H}]^+$  calcd. for  $\text{C}_{16}\text{H}_{12}\text{NO}_3$  266.0812; found: 266.0813.

### 3-(1-(2-Bromo-4,5-dimethoxyphenyl)vinyl)benzo[d]isoxazole **3ak**

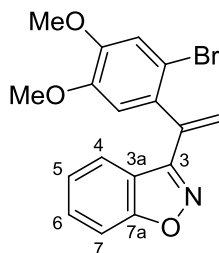

Prepared from 3-bromonitronate **2k** (87 mg, 0.21 mmol) and silane **1a** (75  $\mu$ L, 92 mg, 0.31 mmol) according to the GP-3. Column chromatography (eluent: PE/EtOAc, 20:1, then 10:1) afforded 51 mg (69%) of title compound as white solid.

$R_f$  = 0.26 (PE/EtOAc, 7:1, UV, anisaldehyde).

mp = 117-119  $^{\circ}$ C (PE/EtOAc, 5:1).

$^1\text{H}$  NMR (300 MHz,  $\text{CDCl}_3$ ):  $\delta$  3.90 (s, 3H, OMe), 3.92 (s, 3H, OMe), 5.78 (s, 1H, =CH<sub>2a</sub>), 6.36 (s, 1H, =CH<sub>2b</sub>), 6.96 (s, 1H, CH<sub>Ar</sub>), 7.10 (s, 1H, CH<sub>Ar</sub>), 7.27 (app t,  $J$  = 7.2 Hz, 1H, CH(5)), 7.40 (d,  $J$  = 8.0 Hz, 1H, CH(4)), 7.55 (app t,  $J$  = 7.5 Hz, 1H, CH(6)), 7.61 (d,  $J$  = 8.4 Hz, 1H, CH(7)).

$^{13}\text{C}$  NMR (75 MHz, DEPT,  $\text{CDCl}_3$ ):  $\delta$  56.2 (OMe), 56.3 (OMe), 110.1 (CH(7)), 113.3 (C<sub>Ar</sub>-Br), 113.9 (CH<sub>Ar</sub>), 115.8 (CH<sub>Ar</sub>), 120.6 (C(3a)), 122.2 (CH(4)), 123.1 (=CH<sub>2</sub>), 123.8 (CH(5)), 129.6 (CH(6)), 132.1 (C<sub>Ar</sub>), 138.1 (C=CH<sub>2</sub>), 148.5 (C<sub>Ar</sub>-OMe), 149.6 (C<sub>Ar</sub>-OMe), 157.0 (C(3)=N), 163.6 (C<sub>Ar</sub>(7a)-O).

HRMS (ESI-TOF):  $m/z$  [M + H]<sup>+</sup> calcd. for C<sub>17</sub>H<sub>15</sub><sup>79</sup>BrNO<sub>3</sub> 360.0230; found: 360.0241.

### 3-(1-Cyclopropylvinyl)benzo[d]isoxazole **3al**

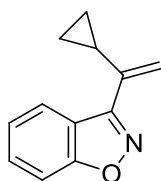

Prepared from 3-bromonitronate **2l** (75 mg, 0.30 mmol) and silane **1a** (110  $\mu$ L, 135 mg, 0.45 mmol) according to the GP-3. Column chromatography (eluent: PE/EtOAc, 30:1) afforded 49 mg (88%) of title compound as colorless oil.

$R_f$  = 0.83 (PE/EtOAc, 20:1, UV, anisaldehyde).

$^1\text{H}$  NMR (300 MHz,  $\text{CDCl}_3$ ):  $\delta$  0.73-0.78 (m, 2H), 0.90-0.97 (m, 2H), 2.00-2.09 (m, 1H, CH), 5.42 (s, 1H, =CH<sub>2a</sub>), 5.78 (s, 1H, =CH<sub>2b</sub>), 7.34 (ddd,  $J$  = 8.0, 6.8, 1.2 Hz, 1H, CH<sub>Ar</sub>), 7.52-7.63 (m, 2H, CH<sub>Ar</sub>), 7.86 (d,  $J$  = 8.0 Hz, 1H, CH<sub>Ar</sub>).

$^{13}\text{C}$  NMR (75 MHz, DEPT,  $\text{CDCl}_3$ ):  $\delta$  7.2 (CH<sub>2</sub>), 14.8 (CH), 110.0 (CH<sub>Ar</sub>), 115.4 (=CH<sub>2</sub>), 120.6 (C), 122.5 (CH), 123.7 (CH), 129.5 (CH), 140.2 (C=CH<sub>2</sub>), 157.9 (C(3)=N), 163.4 (C<sub>Ar</sub>(7a)-O).

HRMS (ESI-TOF):  $m/z$  [M + H]<sup>+</sup> calcd. for C<sub>12</sub>H<sub>12</sub>NO 186.0913; found: 186.0921.

### 3-(4-Phenylbut-1-en-2-yl)benzo[d]isoxazole **3am**

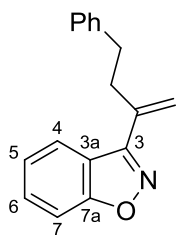

Prepared from 3-bromonitronate **2m** (100 mg, 0.32 mmol) and silane **1a** (117  $\mu$ L, 143 mg, 0.48 mmol) according to the GP-3. Column chromatography (eluent: PE, then PE/EtOAc, 20:1) followed by crystallization (PE/EtOAc, 5:1) afforded 73 mg (91%) of title compound as white crystals.

$R_f$  = 0.30 (PE/EtOAc, 10:1, UV, anisaldehyde).

mp = 60-62  $^{\circ}$ C (PE/EtOAc, 5:1).

$^1\text{H}$  NMR (300 MHz,  $\text{CDCl}_3$ ):  $\delta$  2.96-3.10 (m, 4H,  $\text{CH}_2\text{CH}_2$ ), 5.58 (br s, 1H,  $=\text{CH}_{2a}$ ), 5.95 (s, 1H,  $=\text{CH}_{2b}$ ), 7.20-7.41 (m, 7H,  $\text{CH}_{\text{Ph}}$  and CH(5)), 7.59 (app td,  $J$  = 6.8, 1.1 Hz, 1H, CH(4)), 7.64 (app t,  $J$  = 8.3 Hz, 1H, CH(6)), 7.87 (d,  $J$  = 8.0 Hz, 1H, CH(7)).

$^{13}\text{C}$  NMR (75 MHz, DEPT,  $\text{CDCl}_3$ ):  $\delta$  34.6 ( $\text{CH}_2$ ), 36.8 ( $\text{CH}_2$ ), 110.1 (CH(7)), 119.5 ( $=\text{CH}_2$ ), 120.5 (C(3a)), 122.5 (CH(4)), 123.8 (CH(5)), 126.0 ( $\text{CH}_{\text{Ph}}$ ), 128.4 ( $\text{CH}_{\text{Ph}}$ ), 128.6 ( $\text{CH}_{\text{Ph}}$ ), 129.6 (CH(6)), 138.3 and 141.5 ( $=\text{C}$  and  $\text{C}_{\text{Ph}}$ ), 157.1 (C(3)=N), 163.6 ( $\text{C}_{\text{Ar}}$ (7a)-O).

HRMS (ESI-TOF):  $m/z$   $[\text{M} + \text{H}]^+$  calcd. for  $\text{C}_{17}\text{H}_{16}\text{NO}$  250.1226; found: 250.1221.

### 4-Methoxy-3-(1-(4-methoxyphenyl)vinyl)benzo[d]isoxazole **3ba**

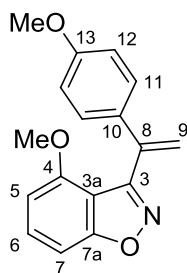

Prepared from 3-bromonitronate **2a** (100 mg, 0.32 mmol) and silane **1b** (157 mg, 0.48 mmol) according to the GP-3. Column chromatography (eluent: PE/EtOAc, 20:1, then 10:1) afforded 64 mg (71%) of title compound as white solid.

$R_f$  = 0.55 (PE/EtOAc, 3:1, UV, anisaldehyde).

mp = 109-110  $^{\circ}$ C (PE/EtOAc, 5:1).

$^1\text{H}$  NMR (300 MHz,  $\text{CDCl}_3$ ):  $\delta$  3.59 (s, 3H, OMe(4)), 3.83 (s, 3H, OMe(13)), 5.71 (d,  $J$  = 0.8 Hz, 1H,  $=\text{CH}_{2a}$ ), 5.87 (d,  $J$  = 0.8 Hz, 1H,  $=\text{CH}_{2b}$ ), 6.56 (d,  $J$  = 7.9 Hz, 1H, CH(5)), 6.87 (d,  $J$  = 8.8

Hz, 2H, CH<sub>Ar</sub>(12)), 7.19 (d, *J* = 8.4 Hz, 1H, CH(7)), 7.32 (d, *J* = 8.8 Hz, 2H, CH<sub>Ar</sub>(11)), 7.47 (app t, *J* = 8.2 Hz, 1H, CH(6)).

<sup>13</sup>C NMR (75 MHz, DEPT, HSQC, HMBC, CDCl<sub>3</sub>): δ 55.3 (OMe), 55.5 (OMe), 102.4 (CH(7)), 103.7 (CH(5)), 111.8 (C(3a)), 113.6 (CH<sub>Ar</sub>(12)), 117.9 (=CH<sub>2</sub>(9)), 128.0 (CH<sub>Ar</sub>(11)), 131.5 (CH(6)), 131.7 (C<sub>Ar</sub>(10)), 137.4 (C(8)=CH<sub>2</sub>), 154.7 (C<sub>Ar</sub>(4)-OMe), 158.0 (C(3)=N), 159.5 (C<sub>Ar</sub>(13)-OMe), 165.2 (C<sub>Ar</sub>(7a)-O).

HRMS (ESI-TOF): *m/z* [M + H]<sup>+</sup> calcd. for C<sub>17</sub>H<sub>16</sub>NO<sub>3</sub> 282.1125; found: 282.1127.

**4-Methoxy-3-(1-(4-methoxyphenyl)vinyl)benzo[d]isoxazole 3ca** and **3-(1-(4-methoxyphenyl)vinyl)-7-morpholinobenzo[d]isoxazole 3'ca**

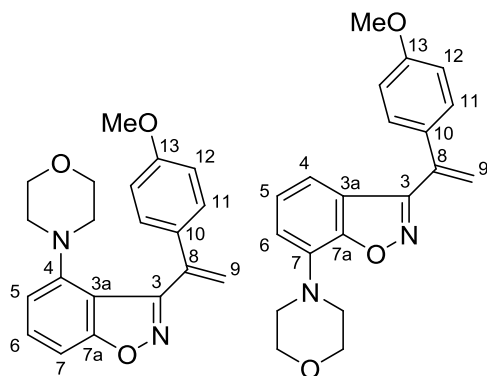

Prepared from 3-bromonitronate **2a** (100 mg, 0.32 mmol) and silane **1c** (183 mg, 0.48 mmol) according to the GP-3. Column chromatography (eluent: PE/EtOAc, 20:1, then 15:1) afforded 9 mg (8%) of mixture of **3'ca** and **3ca** (**3'ca** : **3ca** = 1.8:1), 40 mg (37%) of mixture of **3ca:3'ca** (16:1 ratio) as colorless oils, and 21 mg (17%) of **4ca** as pale yellow crystals. Total yield of **3ca** and **3'ca** 45%, total ratio **3ca** : **3'ca** = 5:1.

R<sub>f</sub>(**3'ca**) = 0.50 (PE/EtOAc, 2:1, UV, anisaldehyde).

R<sub>f</sub>(**3ca**) = 0.45 (PE/EtOAc, 2:1, UV, anisaldehyde).

mp (**3ca**) = 117-119 °C (PE/EtOAc, 3:1).

**3ca:**

<sup>1</sup>H NMR (300 MHz, COSY, CDCl<sub>3</sub>): δ 2.91-2.94 (m, 4H, CH<sub>2</sub>-N), 3.47-3.50 (m, 4H, CH<sub>2</sub>-O), 3.82 (s, 3H, OMe), 5.69 (s, 1H, =CH<sub>2a</sub>), 6.06 (s, 1H, =CH<sub>2b</sub>), 6.76 (d, *J* = 7.7 Hz, 1H, CH(5)), 6.86 (d, *J* = 8.9 Hz, 2H, CH<sub>Ar</sub>(12)), 7.31 (d, *J* = 8.3 Hz, 1H, CH(7)), 7.36 (d, *J* = 8.9 Hz, 2H, CH<sub>Ar</sub>(11)), 7.49 (app t, *J* = 8.0 Hz, 1H, CH(6)).

<sup>13</sup>C NMR (75 MHz, DEPT, HSQC, HMBC, CDCl<sub>3</sub>): δ 52.6 (CH<sub>2</sub>-N), 55.4 (OMe), 66.3 (CH<sub>2</sub>-O), 104.5 (CH(7)), 111.5 (CH(5)), 113.7 (CH<sub>Ar</sub>(12)), 114.9 (C(3a)), 116.6 (=CH<sub>2</sub>(9)), 127.7 (CH<sub>Ar</sub>(11)), 129.8 (C<sub>Ar</sub>(10)), 130.9 (CH(6)), 137.2 (C(8)=CH<sub>2</sub>), 148.7 (C<sub>Ar</sub>(4)-N), 157.7 (C(3)=N), 159.9 (C<sub>Ar</sub>(13)-OMe), 165.4 (C<sub>Ar</sub>(7a)-O).

**3'ca:**

$^1\text{H}$  NMR (300 MHz, COSY,  $\text{CDCl}_3$ ):  $\delta$  3.42-3.45 (m, 4H,  $\text{CH}_2\text{-N}$ ), 3.85 (s, 3H, OMe), 3.97-4.00 (m, 4H,  $\text{CH}_2\text{-O}$ ), 5.86 (s, 1H,  $=\text{CH}_{2a}$ ), 5.87 (s, 1H,  $=\text{CH}_{2b}$ ), 6.85-6.94 (m, 4H,  $\text{CH}(4)$ ,  $\text{CH}(6)$ , and  $\text{CH}_{\text{Ar}}(12)$ ), 7.14 (app t,  $J = 7.8$  Hz, 1H,  $\text{CH}(5)$ ), 7.40 (d,  $J = 9.0$  Hz, 2H,  $\text{CH}_{\text{Ar}}(11)$ ).

$^{13}\text{C}$  NMR (75 MHz, DEPT, HSQC, HMBC,  $\text{CDCl}_3$ ):  $\delta$  49.7 ( $\text{CH}_2\text{-N}$ ), 55.3 (OMe), 66.9 ( $\text{CH}_2\text{-O}$ ), 113.9 ( $\text{CH}_{\text{Ar}}(12)$ ), 114.2 and 114.3 ( $\text{CH}(4)$  and  $\text{CH}(6)$ ), 118.4 ( $=\text{CH}_2(9)$ ), 122.6 ( $\text{C}(3a)$ ), 124.7 ( $\text{CH}(5)$ ), 128.8 ( $\text{CH}_{\text{Ar}}(11)$ ), 130.6 ( $\text{C}_{\text{Ar}}(10)$ ), 136.5 ( $\text{C}_{\text{Ar}}(7)\text{-N}$ ), 137.0 ( $\text{C}(8)=\text{CH}_2$ ), 155.9 ( $\text{C}_{\text{Ar}}(7a)\text{-O}$ ), 158.6 ( $\text{C}(3)=\text{N}$ ), 159.9 ( $\text{C}_{\text{Ar}}(13)\text{-OMe}$ ).

HRMS (ESI-TOF):  $m/z$   $[\text{M} + \text{H}]^+$  calcd. for  $\text{C}_{20}\text{H}_{21}\text{N}_2\text{O}_3$  337.1547; found: 337.1548.

#### 4a-(4-Methoxyphenyl)-3,3-dimethyl-9-morpholino-4,4a-dihydro-3H-benzofuro[3,2-c][1,2]oxazine 4ca

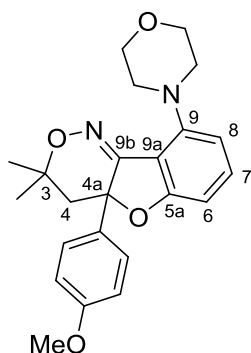

Obtained as a side product during the synthesis of **3ca**.

$R_f = 0.36$  (PE/EtOAc, 2:1, UV, anisaldehyde).

mp = 153-155 °C (PE/EtOAc, 3:1).

$^1\text{H}$  NMR (300 MHz, COSY,  $\text{CDCl}_3$ ):  $\delta$  1.05 (s, 3H,  $\text{Me}_a(3)$ ), 1.31 (s, 3H,  $\text{Me}_b(3)$ ), 2.22 (d,  $J = 12.7$  Hz, 1H,  $\text{CH}_{2a}(4)$ ), 3.09 (d,  $J = 12.7$  Hz, 1H,  $\text{CH}_{2b}(4)$ ), 3.11-3.17 (m, 2H,  $\text{CH}_2\text{-N}$ ), 3.47-3.54 (m, 2H,  $\text{CH}_2\text{-N}$ ), 3.80 (s, 3H, OMe), 3.88-4.04 (m, 4H,  $\text{CH}_2\text{-O}$ ), 6.50 (d,  $J = 8.2$  Hz, 1H) and 6.51 (d,  $J = 8.1$  Hz, 1H) ( $\text{CH}(6)$  and  $\text{CH}(8)$ ), 6.88 (d,  $J = 8.9$  Hz, 2H,  $\text{CH}_{\text{Ar}}$ ), 7.32 (app t,  $J = 8.1$  Hz, 1H,  $\text{CH}(7)$ ), 7.35 (d,  $J = 8.9$  Hz, 2H,  $\text{CH}_{\text{Ar}}$ ).

$^{13}\text{C}$  NMR (75 MHz, DEPT, HSQC, HMBC,  $\text{CDCl}_3$ ):  $\delta$  28.4 ( $\text{Me}_a(3)$ ), 30.3 ( $\text{Me}_b(3)$ ), 48.4 ( $\text{CH}_2(4)$ ), 50.2 ( $\text{CH}_2\text{-N}$ ), 55.3 (OMe), 67.0 ( $\text{CH}_2\text{-O}$ ), 73.7 ( $\text{C}(3)\text{-O}$ ), 85.2 ( $\text{C}(4a)\text{-O}$ ), 104.1 ( $\text{CH}(6)$  or 8), 108.5 ( $\text{C}(9a)$ ), 108.7 ( $\text{CH}(8)$  or 6), 113.9 ( $\text{CH}_{\text{Ar}}$ ), 127.7 ( $\text{CH}_{\text{Ar}}$ ), 129.3 ( $\text{C}_{\text{Ar}}$ ), 134.8 ( $\text{CH}(7)$ ), 150.2 ( $\text{C}_{\text{Ar}}(9)\text{-N}$ ), 159.6 ( $\text{C}_{\text{Ar}}\text{-OMe}$ ), 164.2 ( $\text{C}_{\text{Ar}}(5a)\text{-O}$ ), 170.6 ( $\text{C}(9b)=\text{N}$ ).

HRMS (ESI-TOF):  $m/z$   $[\text{M} + \text{H}]^+$  calcd. for  $\text{C}_{23}\text{H}_{27}\text{N}_2\text{O}_4$  395.1965; found: 395.1951.



**9-Bromo-4a-(4-methoxyphenyl)-3,3-dimethyl-4,4a-dihydro-3H-benzofuro[3,2-c][1,2]oxazine 4da**

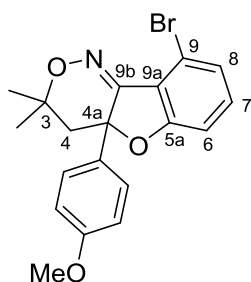

Prepared from 3-bromonitronate **2a** (55 mg, 0.18 mmol) and silane **1d** (69  $\mu$ L, 100 mg, 0.27 mmol) according to the GP-3. Column chromatography (eluent: PE/EtOAc, 15:1, then 10:1) afforded 42 (61%) of title compound as pale yellow solid and 18 mg (33%) of starting nitronate.

$R_f = 0.57$  (PE/EtOAc, 3:1, UV, anisaldehyde).

mp = 121-123  $^{\circ}$ C (dec.) (PE/EtOAc, 5:1).

$^1\text{H}$  NMR (300 MHz, COSY,  $\text{CDCl}_3$ ):  $\delta$  1.04 (s, 3H,  $\text{Me}_a(3)$ ), 1.34 (s, 3H,  $\text{Me}_b(3)$ ), 2.24 (d,  $J = 12.6$  Hz, 1H,  $\text{CH}_{2a}(4)$ ), 3.13 (d,  $J = 12.6$  Hz, 1H,  $\text{CH}_{2b}(4)$ ), 3.79 (s, 3H, OMe), 6.83-6.88 (m, overlapped, 1H, CH(6)), 6.88 (d,  $J = 8.9$  Hz, 2H,  $\text{CH}_{Ar}$ ), 7.20-7.26 (m, 2H, CH(7) and CH(8)), 7.37 (d,  $J = 8.9$  Hz, 2H,  $\text{CH}_{Ar}$ ).

$^{13}\text{C}$  NMR (75 MHz, DEPT, HSQC, HMBC,  $\text{CDCl}_3$ ):  $\delta$  28.3 ( $\text{Me}_a(3)$ ), 30.5 ( $\text{Me}_b(3)$ ), 48.4 ( $\text{CH}_2(4)$ ), 55.3 (OMe), 74.5 ( $\text{C}(3)\text{-O}$ ), 86.6 ( $\text{C}(4a)\text{-O}$ ), 110.7 (CH(6)), 114.0 ( $\text{CH}_{Ar}$ ), 118.0 and 119.0 ( $\text{C}(9a)$  and  $\text{C}(9)\text{-Br}$ ), 126.2 (CH(8)), 127.9 ( $\text{CH}_{Ar}$ ), 128.2 ( $\text{C}_{Ar}$ ), 134.2 (CH(7)), 159.9 ( $\text{C}_{Ar}\text{-OMe}$ ), 163.4 ( $\text{C}_{Ar}(5a)\text{-O}$ ), 170.1 ( $\text{C}(9b)=\text{N}$ ).

HRMS (ESI-TOF):  $m/z$   $[\text{M} + \text{H}]^+$  calcd. for  $\text{C}_{19}\text{H}_{19}^{79}\text{BrNO}_3$  388.0543; found: 388.0542.

The crystallographic information for compound **4da** was deposited in the Cambridge Crystallographic Data Centre (CCDC 2346577).

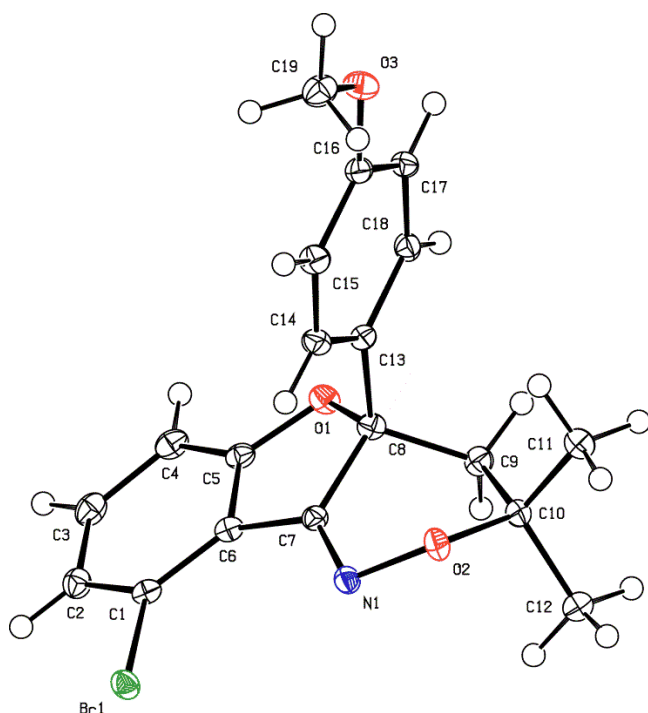

General view of benzisoxazole **4da** in representation of atoms *via* thermal ellipsoids at 50% probability level.

### 6-(Benzo[d]isoxazol-3-yl)-6-(4-methoxyphenyl)hex-5-enal **3ap**

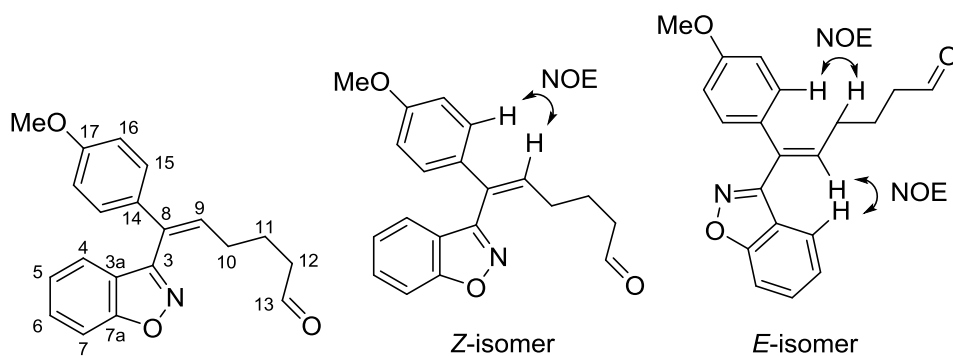

Prepared from 3-bromonitronate **2p** (150 mg, 0.46 mmol) and silane **1a** (167  $\mu$ L, 206 mg, 0.69 mmol) according to the GP-3. Column chromatography (eluent: PE/EtOAc, 20:1, then 15:1, then 10:1) afforded 51 mg (34%) of **3ap** (*Z*-only) and 38 mg (26%) of **3ap** (*E/Z* = 1.7:1) as colorless oil. Total yield – 60%. Total *Z/E* = 2.7:1.

*Z/E* ratio in reaction mixture = 2.7:1.

$R_f$ ((*Z*)-**3ap**) = 0.35 (PE/EtOAc, 3:1, UV, anisaldehyde).

$R_f$ ((*E*)-**3ap**) = 0.30 (PE/EtOAc, 3:1, UV, anisaldehyde).

Z-isomer

$^1\text{H}$  NMR (300 MHz, COSY,  $\text{CDCl}_3$ ):  $\delta$  1.86 (app quint,  $J = 7.4$  Hz, 2H,  $\text{CH}_2(11)$ ), 2.33 (app q,  $J = 7.6$  Hz, 2H,  $\text{CH}_2(10)$ ), 2.49 (td,  $J = 7.3, 1.4$  Hz, 2H,  $\text{CH}_2(12)$ ), 3.81 (s, 3H, OMe), 6.37 (t,  $J = 7.6$  Hz, 1H,  $=\text{CH}(9)$ ), 6.85 (d,  $J = 8.8$  Hz, 2H,  $\text{CH}_{\text{Ar}}(16)$ ), 7.13-7.21 (m, 2H, CH(4) and CH(5)), 7.25 (d,  $J = 8.8$  Hz, 2H,  $\text{CH}_{\text{Ar}}(15)$ ), 7.53 (ddd,  $J = 8.4, 6.4, 1.7$  Hz, 1H, CH(6)), 7.62 (app d,  $J = 8.5$  Hz, 1H, CH(7)), 9.76 (t,  $J = 1.4$  Hz, 1H, CHO(13)).

Characteristic NOESY interaction:  $=\text{CH}(9) / \text{CH}_{\text{Ar}}(15)$ .

$^{13}\text{C}$  NMR (75 MHz, DEPT, HSQC, HMBC,  $\text{CDCl}_3$ ):  $\delta$  22.0 ( $\text{CH}_2(11)$ ), 29.4 ( $\text{CH}_2(10)$ ), 43.2 ( $\text{CH}_2(12)$ ), 55.3 (OMe), 109.9 (CH(7)), 113.9 ( $\text{CH}_{\text{Ar}}(16)$ ), 122.0 (C(3a)), 122.4 (CH(4)), 123.5 (CH(5)), 128.1 ( $\text{CH}_{\text{Ar}}(15)$ ), 129.2 ( $\underline{\text{C}}(8)=\text{CH}$ ), 129.8 (CH(6)), 131.5 ( $\text{C}_{\text{Ar}}(14)$ ), 134.1 ( $=\text{CH}(9)$ ), 156.5 (C(3)=N), 159.5 ( $\underline{\text{C}}_{\text{Ar}}(17)-\text{OMe}$ ), 163.2 ( $\text{C}_{\text{Ar}}(7a)-\text{O}$ ), 202.2 (CH(14)=O).

E-isomer

$^1\text{H}$  NMR (300 MHz, COSY,  $\text{CDCl}_3$ ):  $\delta$  1.88 (app quint,  $J = 7.4$  Hz, 2H,  $\text{CH}_2(11)$ ), 2.40 (app q,  $J = 7.5$  Hz, 2H,  $\text{CH}_2(10)$ ), 2.46-2.55 (m, 2H,  $\text{CH}_2(12)$ ), 3.87 (s, 3H, OMe), 6.62 (t,  $J = 7.5$  Hz, 1H,  $=\text{CH}(9)$ ), 6.96 (d,  $J = 8.8$  Hz, 2H,  $\text{CH}_{\text{Ar}}(16)$ ), 7.05 (app d,  $J = 7.9$  Hz, 1H, CH(4)), 7.15-7.19 (m, 1H, CH(5)), 7.24 (d,  $J = 8.8$  Hz, 2H,  $\text{CH}_{\text{Ar}}(15)$ ), 7.48 (ddd,  $J = 8.4, 6.8, 1.2$  Hz, 1H, CH(6)), 7.56 (app d,  $J = 8.4$  Hz, 1H, CH(7)), 9.77 (t,  $J = 1.5$  Hz, 1H, CHO(13)).

Characteristic NOESY interaction:  $=\text{CH}_2(10) / \text{CH}_{\text{Ar}}(15)$ ; CH(9) / CH(4).

$^{13}\text{C}$  NMR (75 MHz, DEPT, HSQC, HMBC,  $\text{CDCl}_3$ ):  $\delta$  21.9 ( $\text{CH}_2(11)$ ), 28.6 ( $\text{CH}_2(10)$ ), 43.3 ( $\text{CH}_2(12)$ ), 55.3 (OMe), 109.9 (CH(7)), 114.0 ( $\text{CH}_{\text{Ar}}(16)$ ), 120.9 (C(3a)), 122.7 (CH(4)), 123.3 (CH(5)), 129.0 ( $\text{C}_{\text{Ar}}(14)$ ), 129.5 (CH(6)), 130.76 ( $\text{CH}_{\text{Ar}}(15)$ ), 130.82 ( $\underline{\text{C}}(8)=\text{CH}$ ), 135.0 ( $=\text{CH}(9)$ ), 158.8 (C(3)=N), 159.3 ( $\underline{\text{C}}_{\text{Ar}}(17)-\text{OMe}$ ), 163.5 ( $\text{C}_{\text{Ar}}(7a)-\text{O}$ ), 202.0 (CH(14)=O).

HRMS (ESI-TOF):  $m/z$   $[\text{M} + \text{H}]^+$  calcd. for  $\text{C}_{20}\text{H}_{20}\text{NO}_3$  322.1438; found: 322.1431.

### (Z)-7-(Benzo[d]isoxazol-3-yl)-7-(4-methoxyphenyl)hept-6-enal **3aq**

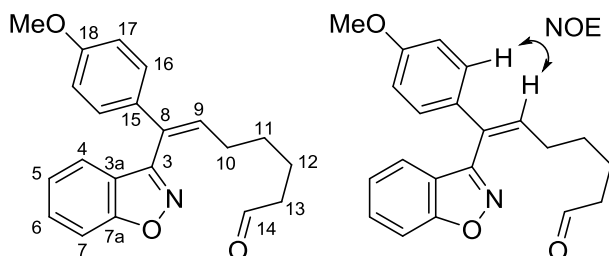

Prepared from 3-bromonitronate **2q** (150 mg, 0.44 mmol) and silane **1a** (161  $\mu\text{L}$ , 197 mg, 0.66 mmol) according to the GP-3. Column chromatography (eluent: PE/EtOAc, 20:1, then 15:1, then 10:1) afforded 13 mg (9%) of **4aq**, 59 mg (40%) of **3aq** (Z-only), and 44 mg (30%) of **3aq** (E/Z=1.6:1) as colorless oils.

$R_f$  (Z-isomer) = 0.40 (PE/EtOAc, 3:1, UV, anisaldehyde).

$^1\text{H}$  NMR (300 MHz, COSY,  $\text{CDCl}_3$ ):  $\delta$  1.50-1.65 (m, 2H,  $\text{CH}_2(11)$ ), 1.58-1.74 (m, 2H,  $\text{CH}_2(12)$ ), 2.31 (app q,  $J = 7.4$  Hz, 2H,  $\text{CH}_2(10)$ ), 2.41 (td,  $J = 7.1, 1.6$  Hz, 2H,  $\text{CH}_2(13)$ ), 3.81 (s, 3H, OMe), 6.39 (t,  $J = 7.6$  Hz, 1H,  $=\text{CH}(9)$ ), 6.85 (d,  $J = 8.9$  Hz, 2H,  $\text{CH}_{\text{Ar}}(17)$ ), 7.14-7.22 (m, 2H, CH(4) and CH(5)), 7.26 (d,  $J = 8.9$  Hz, 2H,  $\text{CH}_{\text{Ar}}(16)$ ), 7.53 (ddd,  $J = 8.4, 6.2, 2.0$  Hz, 1H, CH(6)), 7.63 (app d,  $J = 8.5$  Hz, 1H, CH(7)), 9.73 (t,  $J = 1.7$  Hz, 1H, CHO(14)).

Characteristic NOESY interaction:  $=\text{CH}(9) / \text{CH}_{\text{Ar}}(16)$ .

$^{13}\text{C}$  NMR (75 MHz, DEPT, HSQC, HMBC,  $\text{CDCl}_3$ ):  $\delta$  21.6 ( $\text{CH}_2(12)$ ), 29.2 ( $\text{CH}_2(11)$ ), 29.7 ( $\text{CH}_2(10)$ ), 43.6 ( $\text{CH}_2(13)$ ), 55.3 (OMe), 109.9 (CH(7)), 113.9 ( $\text{CH}_{\text{Ar}}(17)$ ), 122.1 (C(3a)), 122.5 and 123.5 (CH(4) and CH(5)), 128.1 ( $\text{CH}_{\text{Ar}}(16)$ ), 128.6 ( $\text{C}(8)=\text{CH}$ ), 129.7 (CH(6)), 131.7 ( $\text{C}_{\text{Ar}}(15)$ ), 134.8 ( $=\text{CH}(9)$ ), 156.6 (C(3)=N), 159.4 ( $\text{C}_{\text{Ar}}(18)-\text{OMe}$ ), 163.2 ( $\text{C}_{\text{Ar}}(7a)-\text{O}$ ), 202.5 (C(14)=O).

HRMS (ESI-TOF):  $m/z$   $[\text{M} + \text{H}]^+$  calcd. for  $\text{C}_{21}\text{H}_{22}\text{NO}_3$  336.1594; found: 336.1588.

**(4a*S*\*,11a*R*\*,11b*R*\*)-11a-(4-Methoxyphenyl)-2,3,4,4a,11a,11b-hexahydro-1H-benzo[*e*]benzofuro[3,2-*c*][1,2]oxazine 4aq**

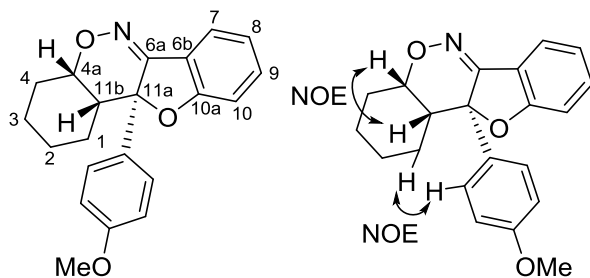

Obtained as a side product during the synthesis of **3aq**.

$R_f = 0.50$  (PE/EtOAc, 3:1, UV, anisaldehyde).

$^1\text{H}$  NMR (300 MHz, COSY,  $\text{CDCl}_3$ ):  $\delta$  1.28-1.47 (m, 2H,  $\text{CH}_2(2)$ ), 1.37-1.54 (m, 2H,  $\text{CH}_2(3)$ ), 1.42-1.54 (m, 2H,  $\text{CH}_2(1)$ ), 1.72-1.78 (m, 2H,  $\text{CH}_2(4)$ ), 2.69 (dt,  $J = 9.0, 6.6$  Hz, 1H, CH(11b)), 3.78 (s, 3H, OMe), 3.91 (app q,  $J = 6.6$  Hz, 1H, CH(4a)), 6.84 (d,  $J = 8.9$  Hz, 2H,  $\text{CH}_{\text{Ar}}$ ), 6.96-7.05 (m, 2H, CH(8) and CH(10)), 7.37 (app td,  $J = 8.1, 1.3$  Hz, 1H, CH(9)), 7.44 (d,  $J = 8.9$  Hz, 2H,  $\text{CH}_{\text{Ar}}$ ), 7.67 (d,  $J = 7.6$  Hz, 1H, CH(7)).

Characteristic NOESY interactions: CH(4a) / CH(11b);  $\text{CH}_{\text{Ar}}$  /  $\text{CH}_2(1)$ .

$^{13}\text{C}$  NMR (75 MHz, DEPT, HSQC, HMBC,  $\text{CDCl}_3$ ):  $\delta$  20.3 ( $\text{CH}_2(3)$ ), 22.3 ( $\text{CH}_2(2)$ ), 24.3 ( $\text{CH}_2(1)$ ), 27.6 ( $\text{CH}_2(4)$ ), 44.8 (CH(11b)), 55.2 (OMe), 74.9 (CH(4a)-O), 87.5 (C(11a)-O), 111.9 (CH(10)), 113.3 ( $\text{CH}_{\text{Ar}}$ ), 119.6 (C(6b)), 122.0 (CH(8)), 123.0 (CH(7)), 128.3 ( $\text{C}_{\text{Ar}}$ ), 128.5 ( $\text{CH}_{\text{Ar}}$ ), 133.3 (CH(9)), 159.4 ( $\text{C}_{\text{Ar}}-\text{OMe}$ ), 162.0 ( $\text{C}_{\text{Ar}}(10a)-\text{O}$ ), 170.4 (C(6a)=N).

HRMS (ESI-TOF):  $m/z$   $[\text{M} + \text{H}]^+$  calcd. for  $\text{C}_{21}\text{H}_{22}\text{NO}_3$  336.1594; found: 336.1595.

## Post transformations of benzisoxazole **3aa**.

### 2-(1-Imino-2-(4-methoxyphenyl)propyl)phenol **7**

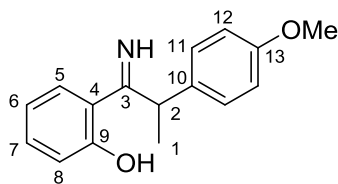

To a solution of benzisoxazole **3aa** (50 mg, 0.20 mmol) in MeOH (2 ml) in a 10 mL Schlenk tube 10% palladium on carbon (10 mg) was added. The tube was equipped with balloon with H<sub>2</sub>, carefully evacuated by a water jet pump and back-filled with H<sub>2</sub> (repeated 3 times). The mixture was hydrogenated under H<sub>2</sub> atmosphere (balloon) for 1 h at r.t. upon vigorous stirring. Then reaction mixture was filtered through celite. Celite was then washed with EtOAc. Filtrate was concentrated under reduced pressure, and the crude product was subjected to column chromatography on silica gel (PE/ EtOAc, 5:1, then 4:1) to give 23 mg (45%) of title product as yellow oil.

R<sub>f</sub> = 0.38 (PE/EtOAc, 2:1, UV, anisaldehyde).

<sup>1</sup>H NMR (300 MHz, COSY, CDCl<sub>3</sub>): δ 1.59 (d, *J* = 7.2 Hz, 3H, CH–Me(1)), 3.82 (s, 3H, OMe), 4.56 (q, *J* = 7.2 Hz, 1H, CH(2)–Me), 6.78 (ddd, *J* = 8.1, 7.1, 1.1 Hz, 1H, CH(6)), 6.92 (d, *J* = 8.7 Hz, 2H, CH<sub>Ar</sub>(12)), 7.01 (dd, *J* = 8.5, 1.1 Hz, 1H, CH(8)), 7.18 (d, *J* = 8.7 Hz, 2H, CH<sub>Ar</sub>(11)), 7.33 (ddd, *J* = 8.5, 7.1, 1.5 Hz, 1H, CH(7)), 7.64 (dd, *J* = 8.1, 1.5 Hz, 1H, CH(5)), 9.28 (br s, 1H, OH).

<sup>13</sup>C NMR (75 MHz, DEPT, HSQC, HMBC, CDCl<sub>3</sub>): δ 19.5 (CH–Me(1)), 43.2 (CH(2)–Me), 55.3 (OMe), 114.6 (CH<sub>Ar</sub>(12)), 117.4 (CH(6)), 117.5 (C(4)), 118.9 (CH(8)), 128.6 (CH(5)), 128.9 (CH<sub>Ar</sub>(11)), 132.4 (C<sub>Ar</sub>(10)), 133.1 (CH(7)), 158.9 (C<sub>Ar</sub>(13)–OMe), 164.3 (C(9)–OH), 183.5 (C(3)=N).

HRMS (ESI-TOF): *m/z* [M + H]<sup>+</sup> calcd. for C<sub>16</sub>H<sub>18</sub>NO<sub>2</sub> 256.1332; found: 256.1337.

### 1-(2-Hydroxyphenyl)-2-(4-methoxyphenyl)propan-1-one **8**

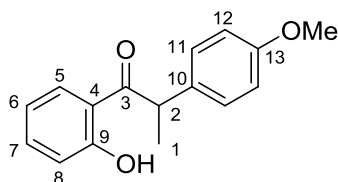

To a solution of benzisoxazole **3aa** (50 mg, 0.20 mmol) in MeOH (8 ml) in a 25 mL Schlenk tube 5% palladium on carbon (5 mg) was added. The tube was equipped with balloon with H<sub>2</sub>, carefully evacuated by a water jet pump and back-filled with H<sub>2</sub> (repeated 3 times). The

mixture was hydrogenated under H<sub>2</sub> atmosphere (balloon) for 5 h at r.t. upon vigorous stirring. Then reaction mixture was filtered through celite. Celite was then washed with MeOH (8 mL). To the filtrate H<sub>2</sub>O (3.2 mL) was added and the resulting solution was kept at r.t. overnight (14 h). Then mixture was concentrated under reduced pressure to remove MeOH. The residue was transferred to separatory funnel, diluted with EtOAc (25 mL) and washed with brine (20 mL). Organic layer was dried (Na<sub>2</sub>SO<sub>4</sub>), and concentrated under reduced pressure. The crude product was subjected to column chromatography on silica gel (PE/ EtOAc, 5:1) to give 43 mg (84%) of title product as colorless oil.

R<sub>f</sub> = 0.70 (PE/EtOAc, 3:1, UV, anisaldehyde).

<sup>1</sup>H NMR (300 MHz, COSY, CDCl<sub>3</sub>): δ 1.55 (d, *J* = 6.9 Hz, 3H, CH–Me(1)), 3.79 (s, 3H, OMe), 4.73 (q, *J* = 6.9 Hz, 1H, CH(2)–Me), 6.81–6.86 (m, 1H, CH(6)), 6.89 (d, *J* = 8.7 Hz, 2H, CH<sub>Ar</sub>(12)), 6.98 (dd, *J* = 8.4, 0.9 Hz, 1H, CH(8)), 7.25 (d, *J* = 8.7 Hz, 2H, CH<sub>Ar</sub>(11)), 7.42 (ddd, *J* = 8.6, 7.3, 1.5 Hz, 1H, CH(7)), 7.84 (dd, *J* = 8.1, 1.5 Hz, 1H, CH(5)), 12.50 (br s, 1H, OH).

<sup>13</sup>C NMR (75 MHz, DEPT, HSQC, HMBC, CDCl<sub>3</sub>): δ 19.3 (CH–Me(1)), 46.4 (CH(2)–Me), 55.3 (OMe), 114.5 (CH<sub>Ar</sub>(12)), 118.6 (C(4)), 118.7 and 118.9 (CH(6) and CH(8)), 128.7 (CH<sub>Ar</sub>(11)), 130.5 (CH(5)), 133.2 (C<sub>Ar</sub>(10)), 136.2 (CH(7)), 158.7 (C<sub>Ar</sub>(13)–OMe), 163.2 (C(9)–OH), 206.8 (C(3)=N).

HRMS (ESI-TOF): *m/z* [M + H]<sup>+</sup> calcd. for C<sub>16</sub>H<sub>17</sub>O<sub>3</sub> 257.1172; found: 257.1175.

### 3-(4-Methoxyphenyl)chroman-4-one **9**

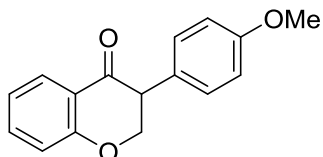

Mixture of benzisoxazole **3aa** (50 mg, 0.20 mmol, 1.0 equiv), Mo(CO)<sub>6</sub> (121 mg, 0.46 mmol, 2.3 equiv.) and Me<sub>3</sub>N<sup>+</sup>O<sup>-</sup> (64 mg, 0.86 mmol, 4.3 equiv.) in MeCN/H<sub>2</sub>O (5/1 v/v, total 3.32 ml) was stirred at 60 °C (oil bath) for 60 min. Reaction was quenched with saturated aqueous NH<sub>4</sub>Cl (5 mL) and extracted with EtOAc (3 × 10 mL). The combined organic extracts were dried with Na<sub>2</sub>SO<sub>4</sub> and concentrated under reduced pressure. The residue was subjected to column chromatography on silica gel (PE/ EtOAc, 3:1) to give 31 mg (61%) of title product as pale yellow solid.

R<sub>f</sub> = 0.48 (PE/EtOAc, 3:1, UV, anisaldehyde).

mp = 95–96 °C (PE/EtOAc, 3:1) (lit.<sup>s10</sup> 93–95 °C).

$^1\text{H}$  NMR (300 MHz,  $\text{CDCl}_3$ ):  $\delta$  3.82 (s, 3H, OMe), 3.97 (dd,  $J = 7.7, 6.6$  Hz, 1H, CH(3)), 4.61-4.68 (m, 2H,  $\text{CH}_2(2)\text{-O}$ ), 6.92 (d,  $J = 8.5$  Hz, 2H,  $\text{CH}_{\text{Ar}}$ ), 7.02-7.09 (m, 2H,  $2\times\text{CH}_{\text{Ar}}$ ), 7.23 (d,  $J = 8.5$  Hz, 2H,  $\text{CH}_{\text{Ar}}$ ), 7.53 (t,  $J = 7.7$  Hz, 1H,  $\text{CH}_{\text{Ar}}$ ), 7.99 (d,  $J = 7.7$  Hz, 1H,  $\text{CH}_{\text{Ar}}$ ).  
NMR matched previously reported data.<sup>s10</sup>

## 2-(Benzo[d]isoxazol-3-yl)-2-hydroxy-2-(4-methoxyphenyl)ethyl 3-chlorobenzoate 10

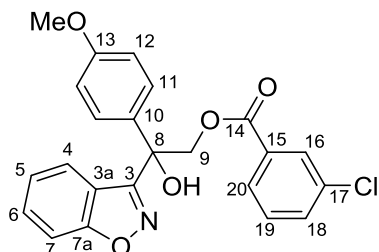

To a solution of benzisoxazole **3aa** (25.0 mg, 0.10 mmol) in  $\text{CH}_2\text{Cl}_2$  (1 ml) *m*CPBA (34 mg, 0.20 mmol, 2 equiv.) and  $\text{NaHCO}_3$  (17 mg, 0.20 mmol, 2 equiv.) were consecutively added at 0 °C (ice-water bath). The cooling bath was removed and the reaction was stirred at r.t. overnight (14 h). Then reaction was quenched by the sat. aq.  $\text{Na}_2\text{S}_2\text{O}_3$  (2 mL) and transferred into  $\text{CH}_2\text{Cl}_2 / \text{H}_2\text{O}$  (10 mL / 5 mL). The aqueous phase was extracted with  $\text{CH}_2\text{Cl}_2$  ( $2\times 10$  mL). The organic layers were combined, washed with water (7 mL), brine (7 mL), dried ( $\text{Na}_2\text{SO}_4$ ) and concentrated under reduced pressure. The crude product was subjected to column chromatography on silica gel (PE/ EtOAc, 15:1, then 10:1) to give 23.8 mg (56%) of title product as pale yellow oil.

$R_f = 0.25$  (PE/EtOAc, 5:1, UV, iodine).

$^1\text{H}$  NMR (300 MHz, COSY,  $\text{CDCl}_3$ ):  $\delta$  3.80 (s, 3H, OMe), 3.92 (s, 1H, OH), 4.95 (d,  $J = 11.7$  Hz, 1H,  $\text{CH}_{2a}(9)\text{-O}$ ), 5.29 (d,  $J = 11.7$  Hz, 1H,  $\text{CH}_{2b}(9)\text{-O}$ ), 6.91 (d,  $J = 8.9$  Hz, 2H,  $\text{CH}_{\text{Ar}}(12)$ ), 7.18-7.23 (m, 1H, CH(5)), 7.32 (app t,  $J = 7.8$  Hz, 1H, CH(19)), 7.48-7.59 (m, 5H, CH(6), CH(7),  $\text{CH}_{\text{Ar}}(11)$ , and CH(18)), 7.67 (app d,  $J = 8.0$  Hz, 1H, CH(4)), 7.81 (app d,  $J = 7.8$  Hz, 1H, CH(20)), 7.90 (t,  $J = 1.7$  Hz, 1H, CH(16)).

$^{13}\text{C}$  NMR (75 MHz, DEPT, HSQC, HMBC,  $\text{CDCl}_3$ ):  $\delta$  55.3 (OMe), 70.7 ( $\text{CH}_2(9)\text{-O}$ ), 75.6 (C(8)-OH), 109.7 (CH(7)), 114.0 ( $\text{CH}_{\text{Ar}}(12)$ ), 120.2 (C(3a)), 123.59 and 123.64 (CH(4) and CH(5)), 127.0 ( $\text{CH}_{\text{Ar}}(11)$ ), 127.9 (CH(20)), 129.7, 129.8, and 129.9 (CH(6), CH(16), and CH(19)), 131.2 and 131.6 (C(10) and C(15)), 133.3 (CH(18)), 134.5 (C(17)-Cl), 159.5 and 159.9 ( $\text{C}_{\text{Ar}}(13)\text{-OMe}$  and C(3)=N), 163.5 ( $\text{C}_{\text{Ar}}(7a)\text{-O}$ ), 165.7 (C(14)=O).

HRMS (ESI-TOF):  $m/z$  [ $\text{M} + \text{Na}$ ] $^+$  calcd. for  $\text{C}_{23}\text{H}_{19}\text{ClINO}_5 + \text{Na}^+$ : 446.0766; found: 446.0767.

### 3-(6-Methoxy-9,10-dihydrophenanthren-9-yl)benzo[d]isoxazole 12

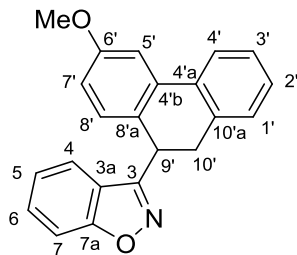

CsF (67 mg, 0.44 mmol, 2.2 equiv.) was placed in a Schlenk tube and dried at ~250 °C (heat gun) in a vacuum (1-2 mmHg) for ~1 min. After cooling to r.t., benzisoxazole **3aa** (50 mg, 0.20 mmol, 1.0 equiv.) and anhydrous acetonitrile (1.6 mL) were added under an argon atmosphere. Then, aryne precursor **1a** (53  $\mu$ L, 65 mg, 0.22 mmol, 1.1 equiv.) was added and the reaction mixture was stirred overnight (14 h). Then, EtOAc (~2 mL) and water (~4 mL) were added upon vigorous stirring. After ~1 min, the mixture was transferred into a separating funnel containing EtOAc (15 mL) and water (15 mL). The organic phase was separated, and the aqueous phase was extracted with EtOAc (3  $\times$  15 mL). The combined organic phases were washed with brine (30 mL), dried with anhydrous Na<sub>2</sub>SO<sub>4</sub>, and concentrated under reduced pressure. The residue was subjected to column chromatography on silica gel (PE/ EtOAc, 30:1) to give 50 mg (77%) of title product as colorless oil.

R<sub>f</sub> = 0.36 (PE/EtOAc, 5:1, UV, anisaldehyde).

<sup>1</sup>H NMR (300 MHz, COSY, CDCl<sub>3</sub>):  $\delta$  3.29 (dd,  $J$  = 15.1, 5.5 Hz, 1H, CH<sub>2a</sub>(10')), 3.53 (dd,  $J$  = 15.1, 10.2 Hz, 1H, CH<sub>2b</sub>(10')), 3.90 (s, 3H, OMe), 4.78 (dd,  $J$  = 10.1, 5.5 Hz, 1H, CH(9')), 6.78 (dd,  $J$  = 8.4, 2.6 Hz, 1H, CH(7')), 6.98 (d,  $J$  = 8.4 Hz, 1H, CH(8')), 7.16 (app t,  $J$  = 7.4 Hz, 1H, CH(5)), 7.22-7.27 (m, 1H, CH(4)), 7.24-7.32 (m, 2H, CH(1') and CH(2')), 7.37-7.43 (m, 1H, CH(3')), 7.47 (d,  $J$  = 2.6 Hz, 1H, CH(5')), 7.51 (ddd,  $J$  = 8.4, 6.8, 1.2 Hz, 1H, CH(6)), 7.59 (app d,  $J$  = 8.5 Hz, 1H, CH(7)), 7.85 (d,  $J$  = 7.7 Hz, 1H, CH(4')).

<sup>13</sup>C NMR (75 MHz, DEPT, HSQC, HMBC, CDCl<sub>3</sub>):  $\delta$  34.8 (CH<sub>2</sub>(10')), 36.5 (CH(9')), 55.4 (OMe), 110.0 (CH(5')), 110.1 (CH(7)), 113.0 (CH(7')), 120.7 (C(3a)), 122.6 (CH(4)), 123.2 (CH(5)), 123.9 (CH(4')), 127.6 (CH(3')), 127.7 (C(8'a)), 128.1 (CH(2')), 128.6 (CH(1')), 129.0 (CH(8')), 129.6 (CH(6)), 133.9 (C(4'a)), 135.1 (C(10'a)), 135.7 (C(4'b)), 159.5 (C<sub>Ar</sub>(6')-OMe), 160.1 (C(3)=N), 163.6 (C<sub>Ar</sub>(7a)-O).

HRMS (ESI-TOF):  $m/z$  [M + H]<sup>+</sup> calcd. for C<sub>22</sub>H<sub>18</sub>NO<sub>2</sub> 328.1332; found: 328.1333.



## References:

- s1. (a) CrysAlisPro. Version 1.171.42. *Rigaku Oxford Diffraction*, **2022**. (b) G. M. Sheldrick, *Acta Cryst.*, 2015, **A71**, 3-8. (c) O. V. Dolomanov, L. J. Bourhis, R. J. Gildea, J. A. K. Howard and H. Puschmann. *J. Appl. Cryst.*, 2009, **42**, 339-341. (d) G. M. Sheldrick, *Acta Cryst.*, 2008, **A64**, 112-122. (e) G. M. Sheldrick, *Acta Cryst.*, 2015, **C71**, 3-8.
- s2. L. V. Romashov, Y. A. Khomutova, V. M. Danilenko, S. L. Ioffe and A. V. Lesiv, *Synthesis* 2010, 407-414.
- s3. A. A. Fadeeva, S. L. Ioffe and A. A. Tabolin, *Synthesis*, 2020, **52**, 2679-2688.
- s4. K. Huang, Q. Ma, X. Shen, L. Gong and E. Meggers, *Asian J. Org. Chem.*, 2016, **5**, 1198-1203.
- s5. S.-W. Yu, S.-H. Zhao, H. Chen, X.-Y. Xu, W.-C. Yuan and X.-M. Zhang, *ChemistrySelect*, 2018, **3**, 4827-4830.
- s6. K. Venkatanna, S. Y. Kumar, M. Karthick, R. Padmanaban and C. R. Ramanathan, *Org. Biomol. Chem.* 2019, **17**, 4077-4086.
- s7. V. Kumar, A. Awasthi, A. Metya and T. Khan, *J. Org. Chem.*, 2019, **84**, 11581-11595.
- s8. A. A. Fadeeva, S. L. Ioffe and A. A. Tabolin, *Tetrahedron Lett.*, 2021, **73**, 153106.
- s9. (a) M. S. Klenov, A. V. Lesiv, Y. A. Khomutova, I. D. Nesterov and S. L. Ioffe, *Synthesis*, 2004, 1159-1170. (b) A. A. Lukoyanov, A. A. Tabolin, Y. V. Nelyubina, S. A. Aksenova and A. Y. Sukhorukov, *Org. Biomol. Chem.* 2023, **21**, 3871-3880.
- s10. F. Bellina, T. Masini, and R. Rossi, *Eur. J. Org. Chem.*, 2010, 1339-1344.

## Copies of NMR spectra

**(Z)-1-(2-Bromo-2-nitrovinyl)-4-fluorobenzene**

<sup>1</sup>H NMR (300 MHz, CDCl<sub>3</sub>)

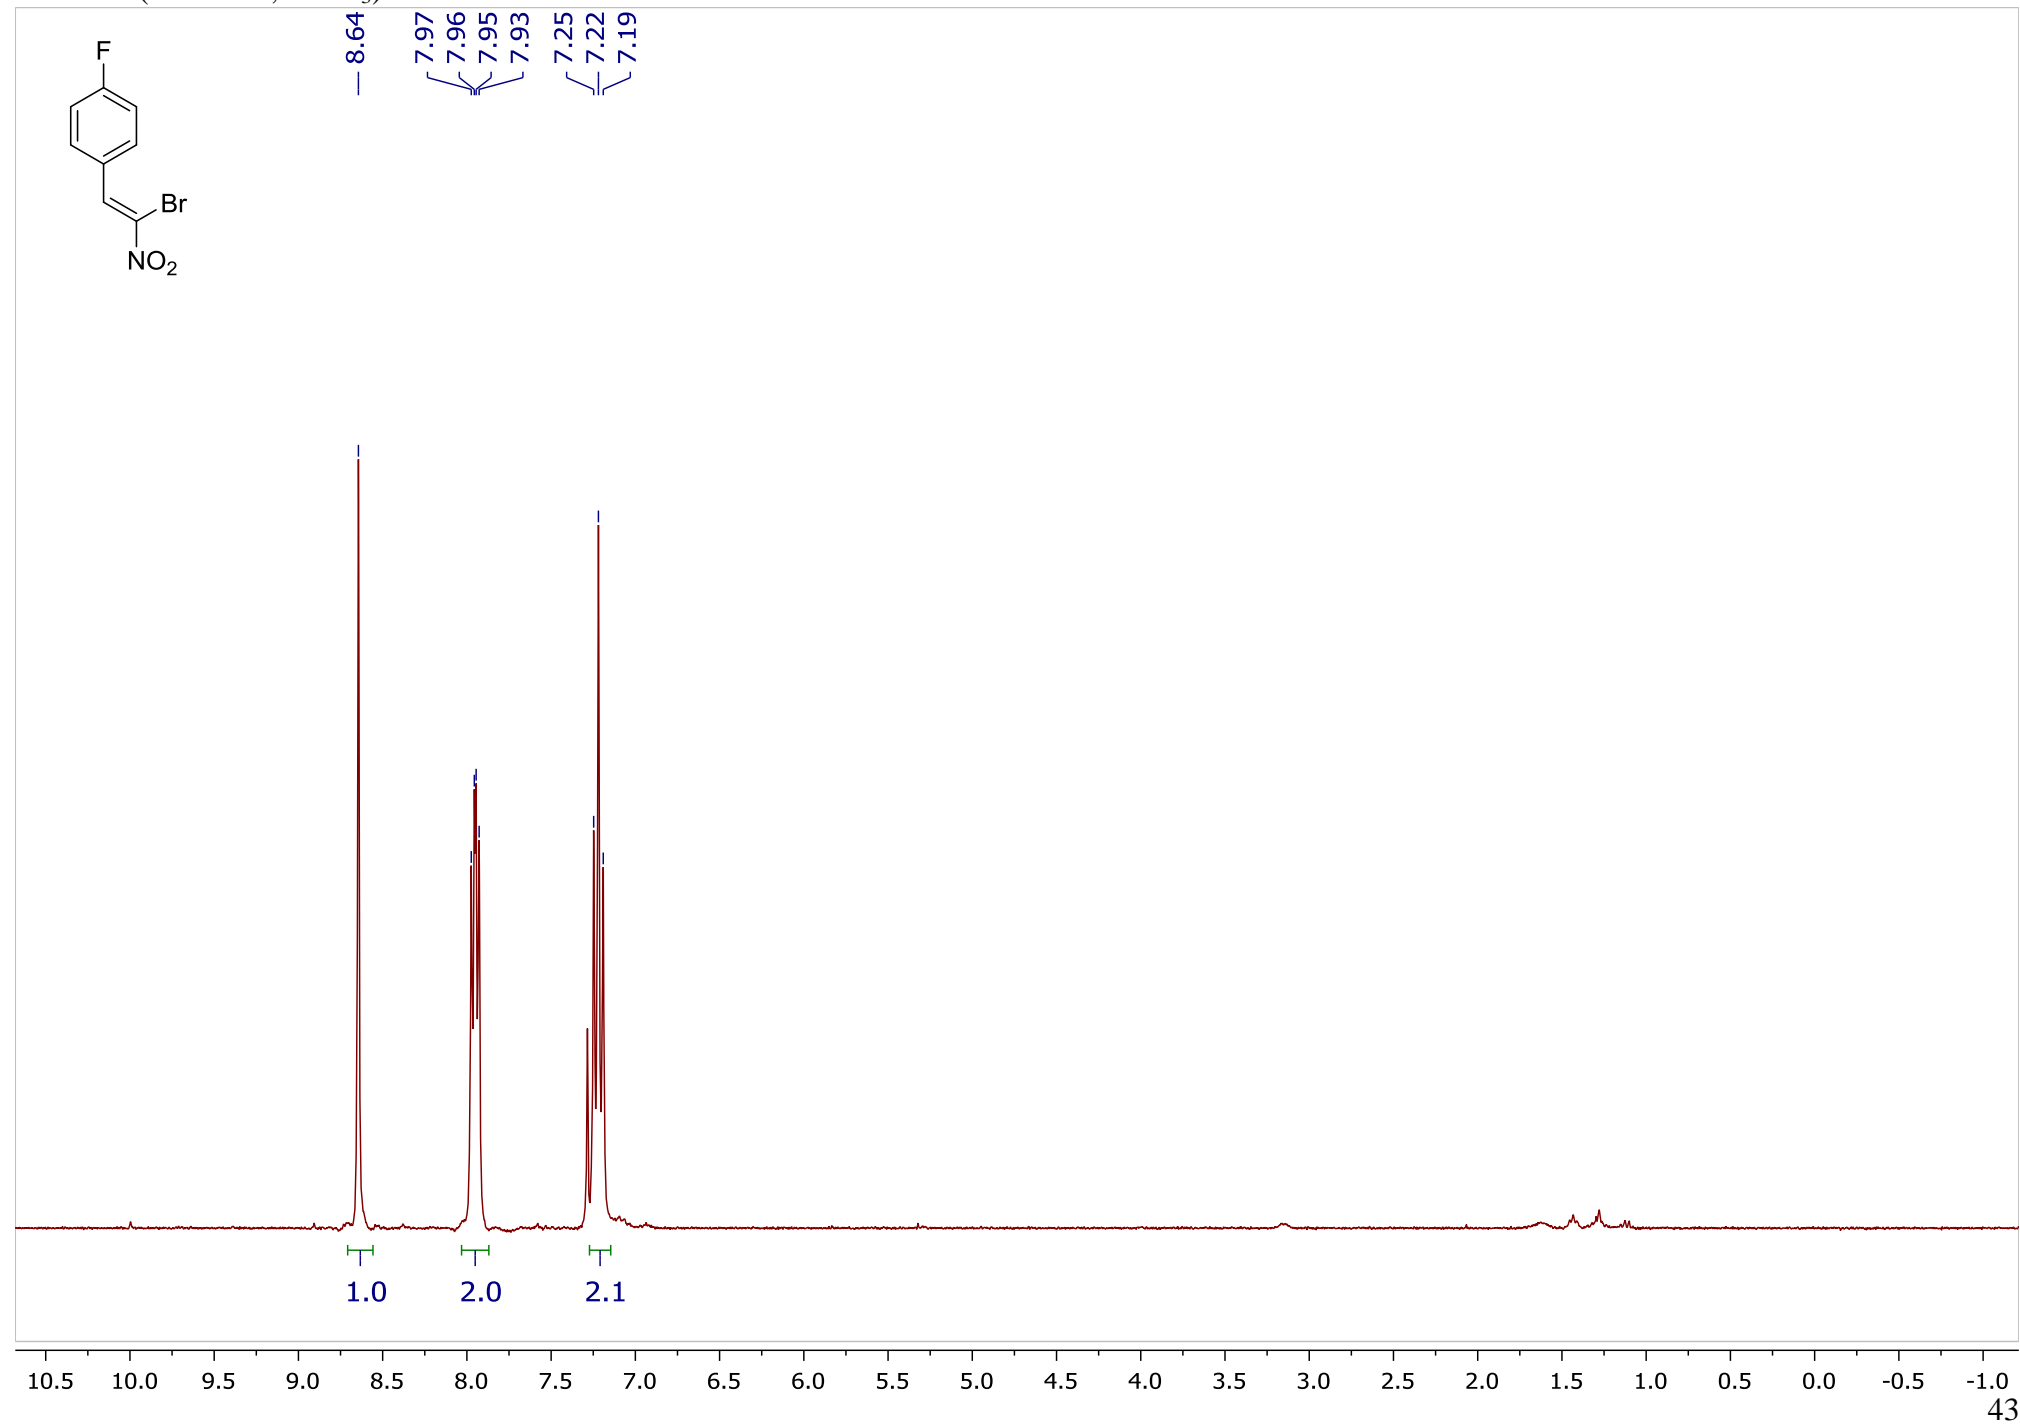

**(Z)-1-(2-Bromo-2-nitrovinyl)-4-methylbenzene**

<sup>1</sup>H NMR (300 MHz, CDCl<sub>3</sub>)

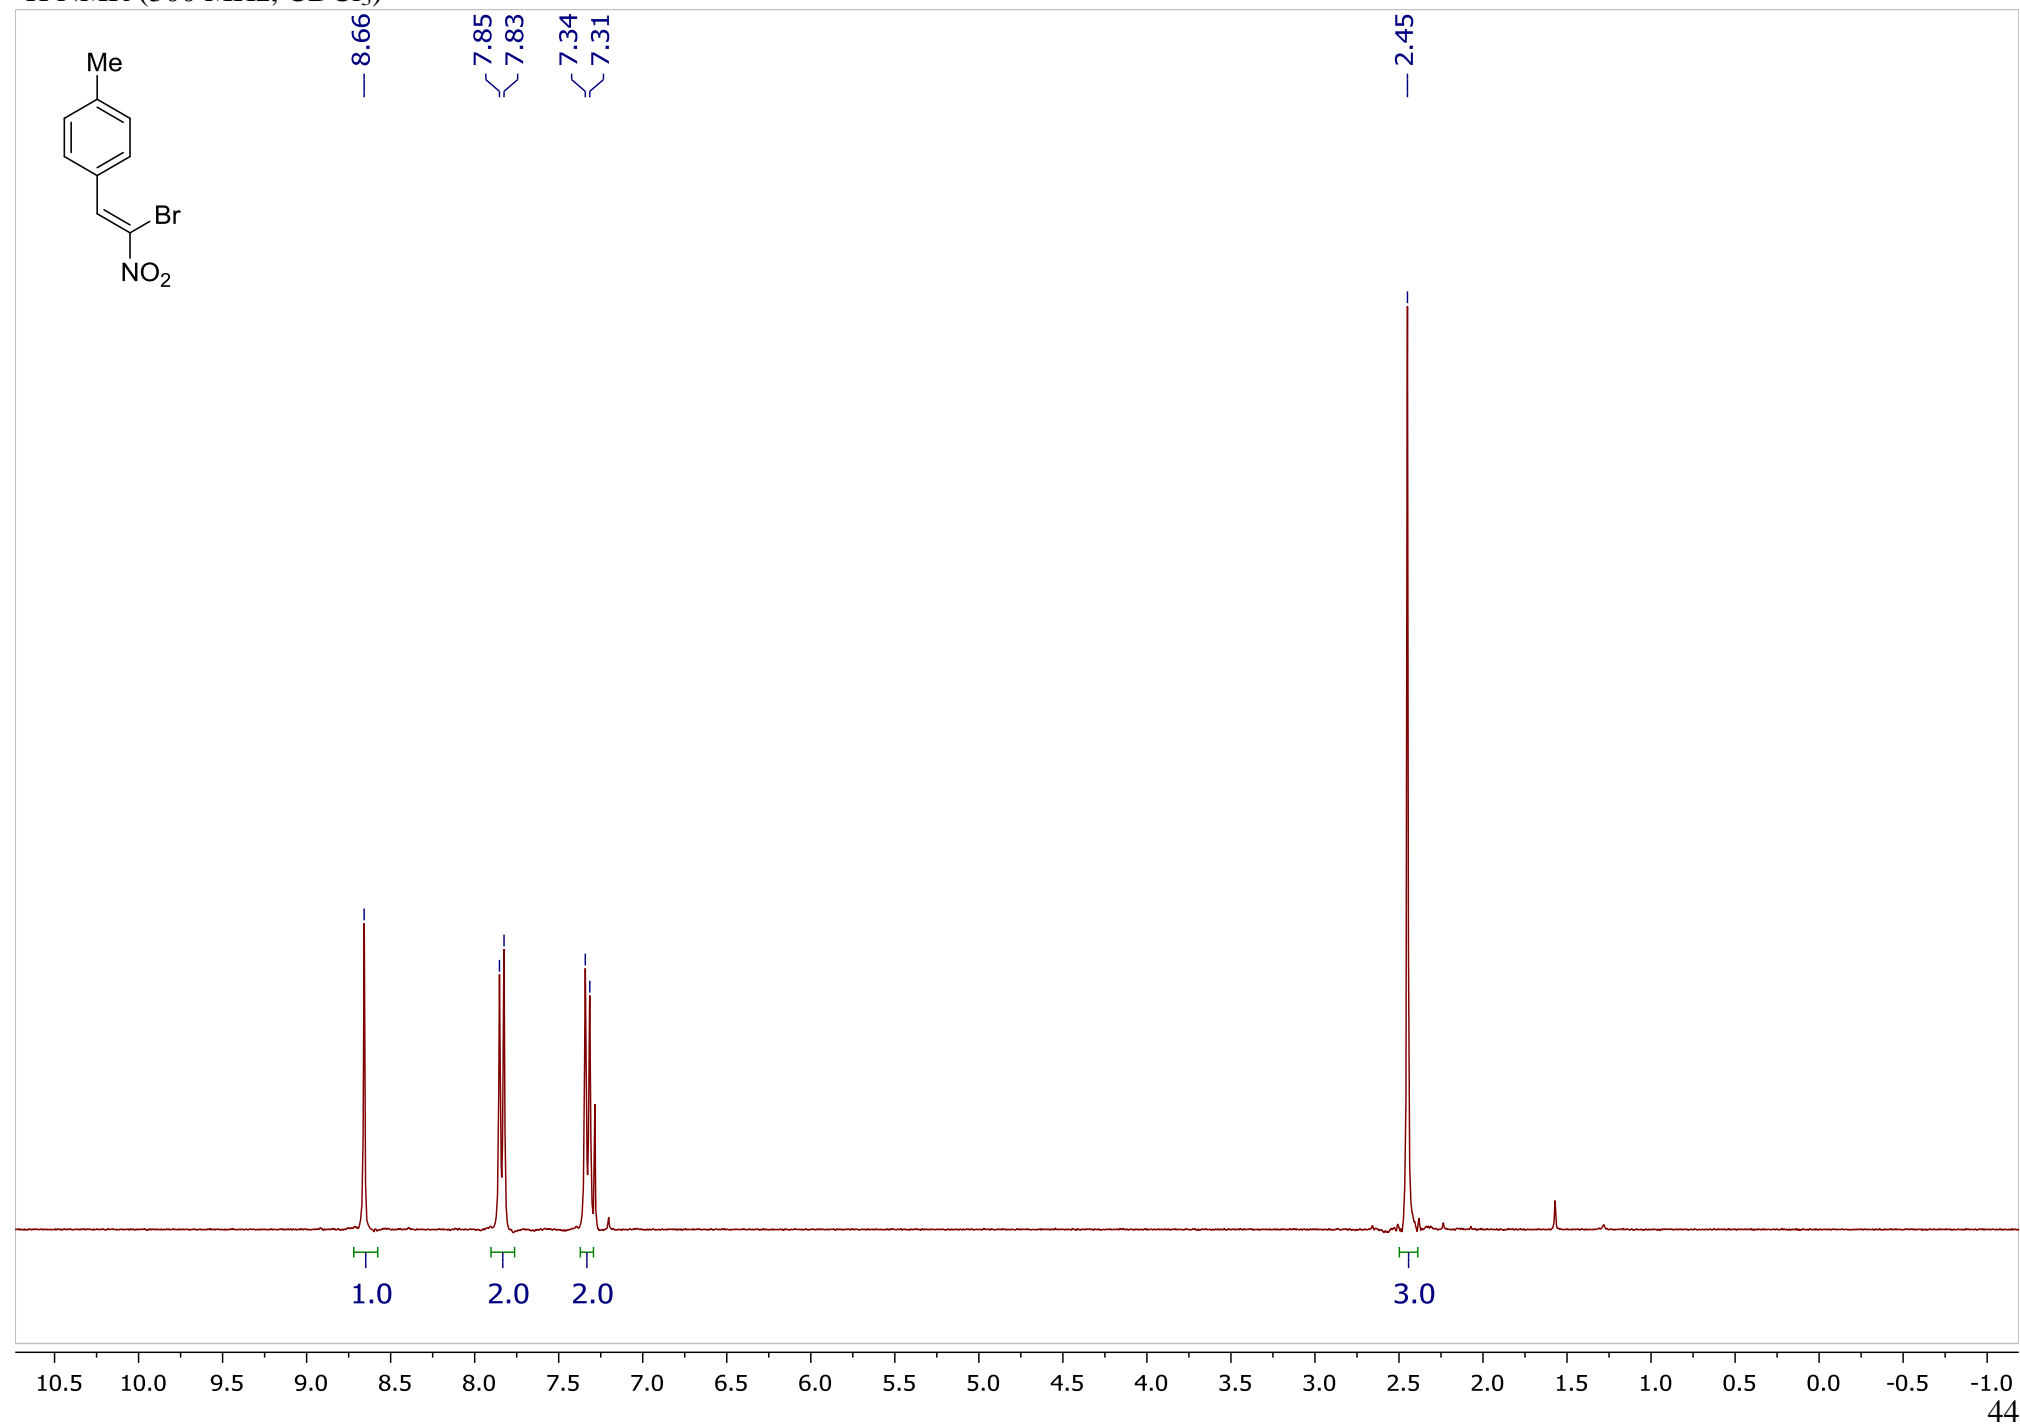

**(Z)-Ethyl 2-(4-(2-bromo-2-nitrovinyl)phenoxy)-2-methylpropanoate**

<sup>1</sup>H NMR (300 MHz, CDCl<sub>3</sub>)

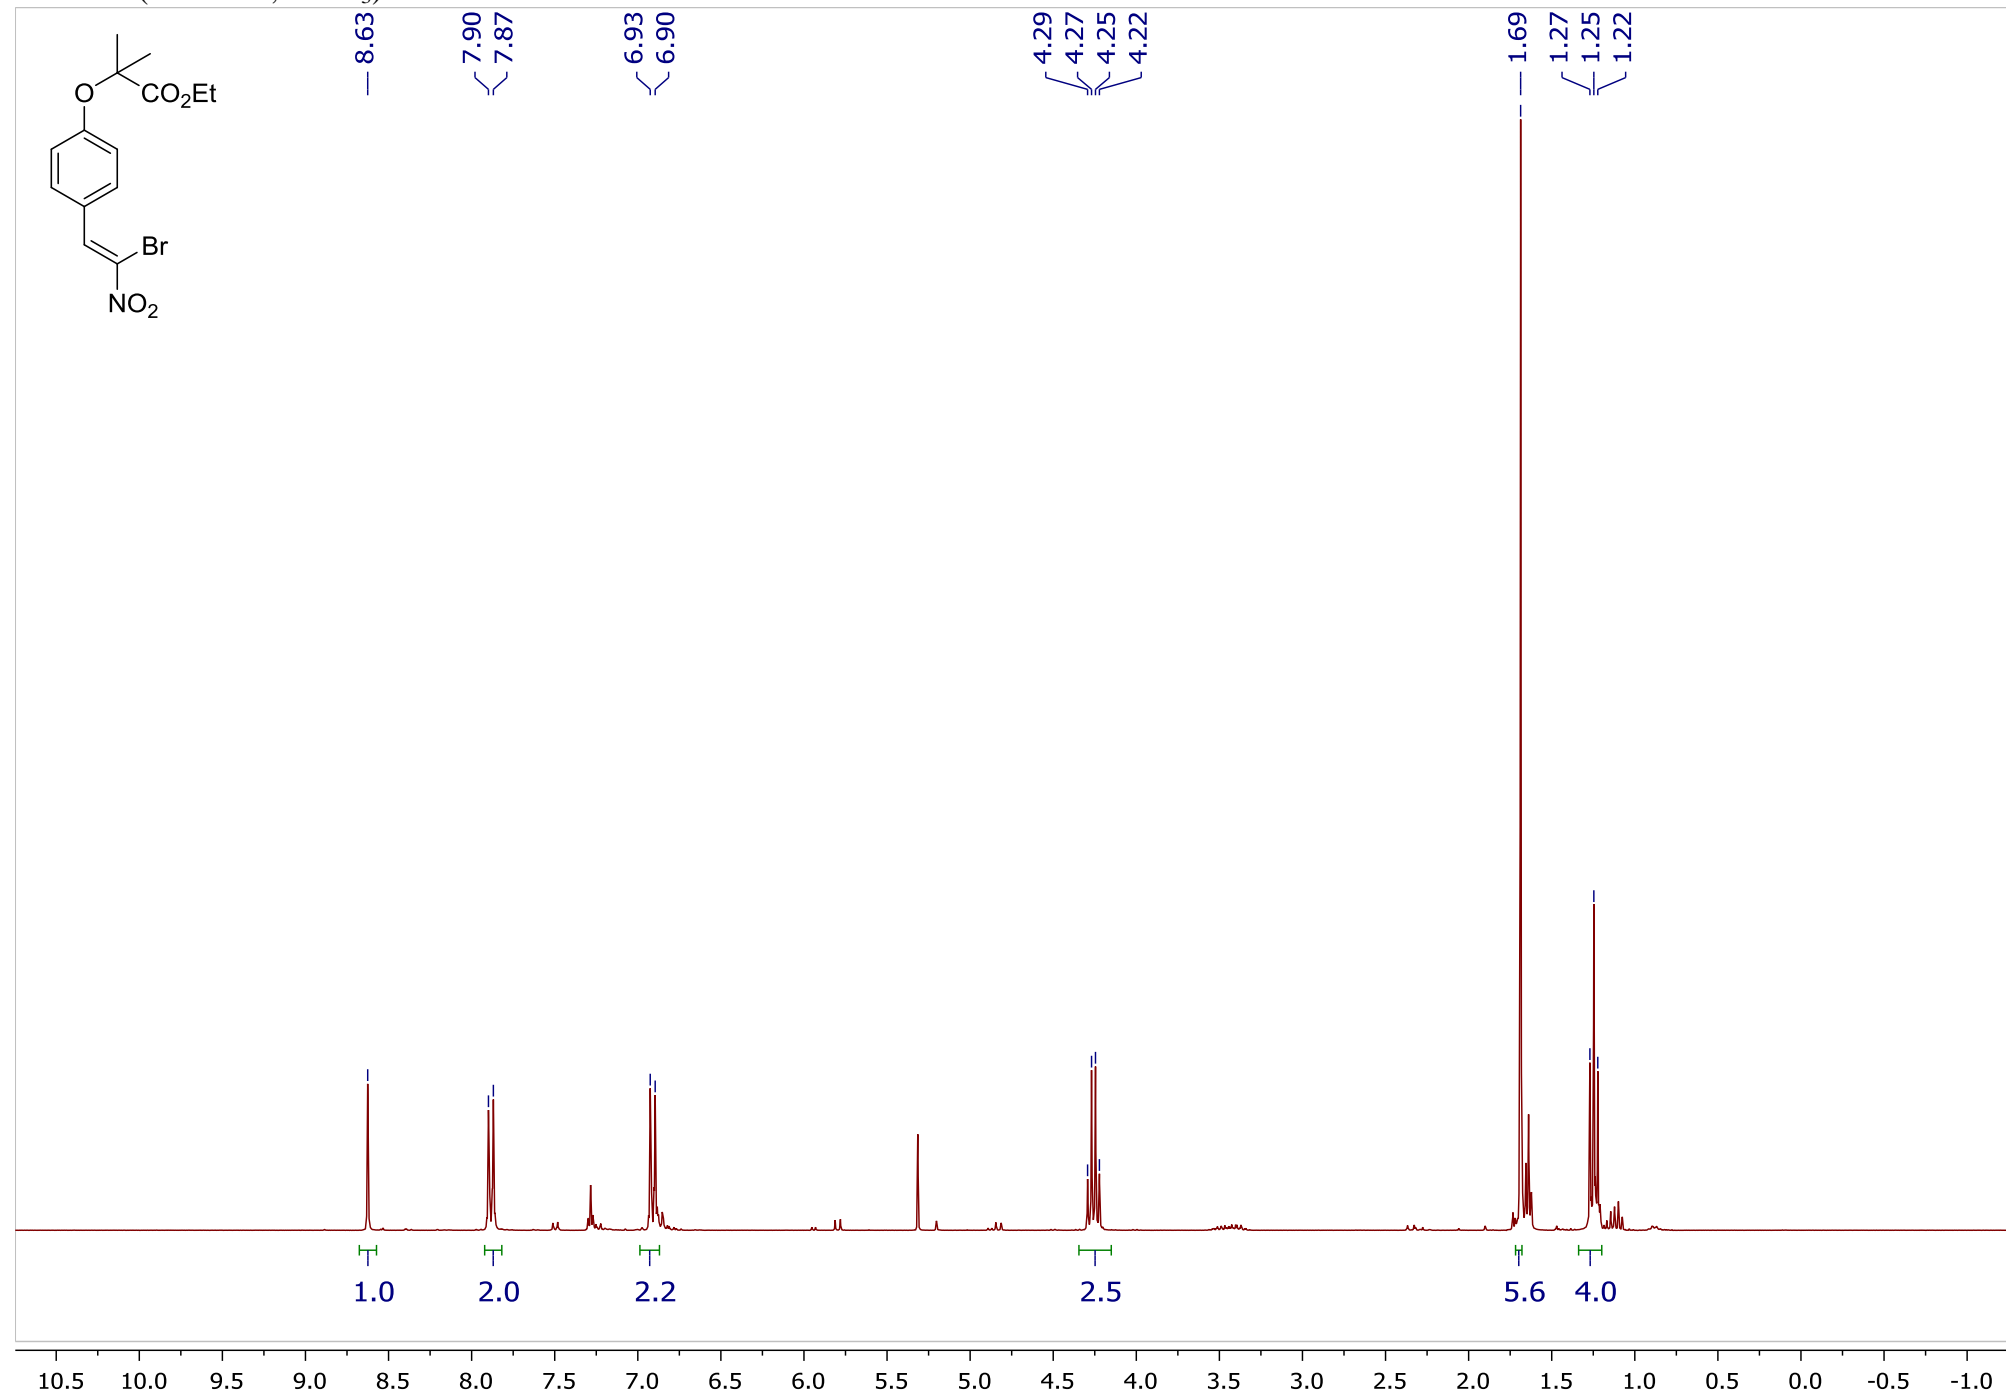

$^{13}\text{C}\{^1\text{H}\}$  NMR (75 MHz,  $\text{CDCl}_3$ )

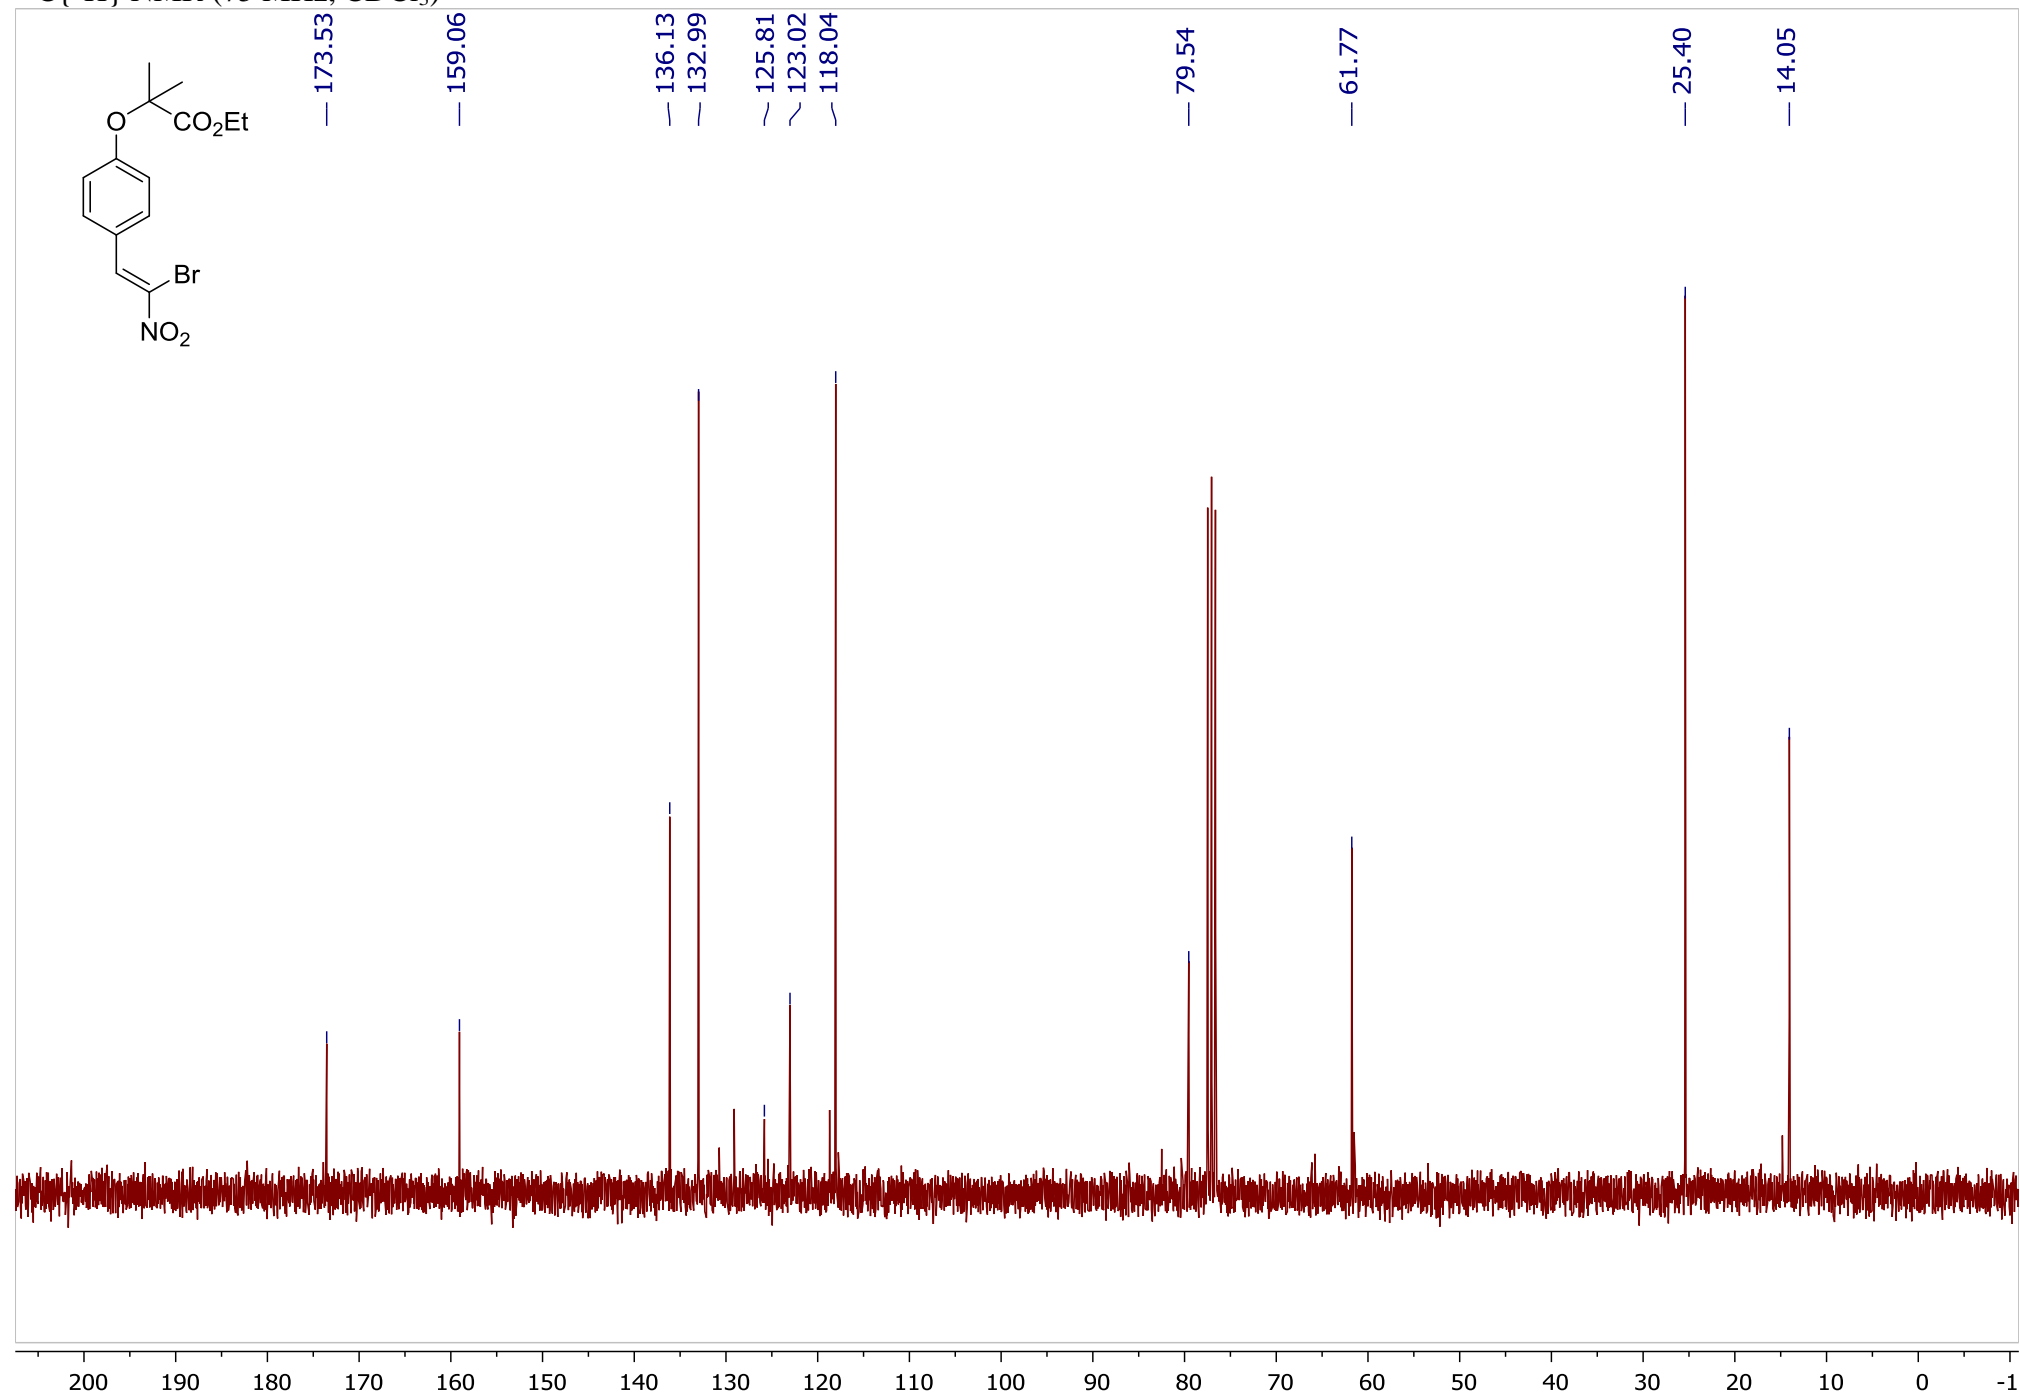

<sup>13</sup>C DEPT 135 (75 MHz, CDCl<sub>3</sub>)

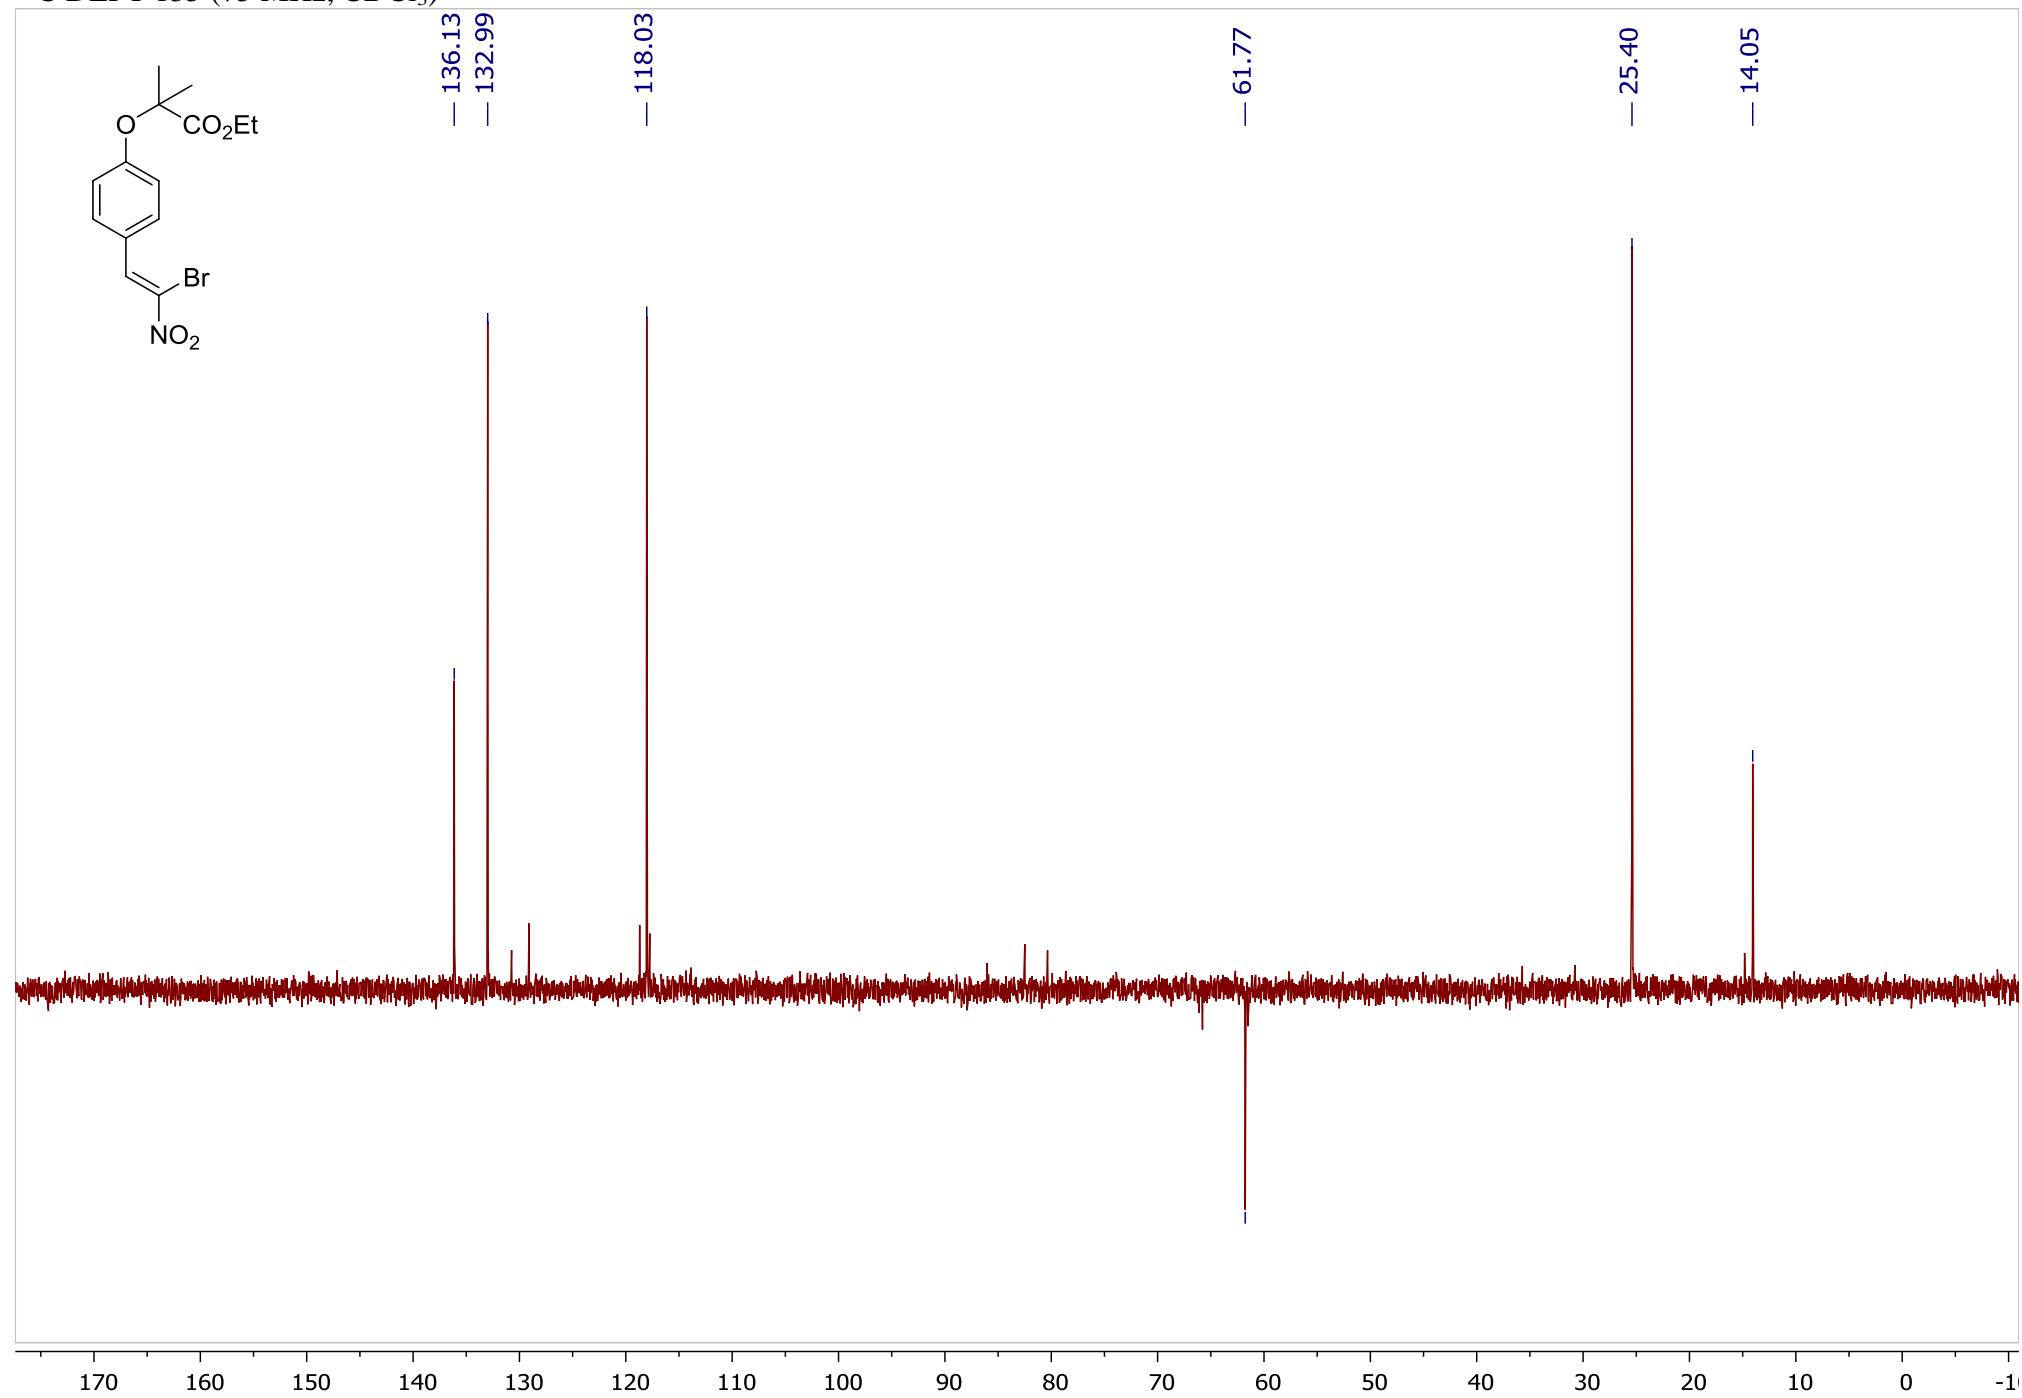

**(Z)-1-(2-Bromo-2-nitrovinyl)-3-methoxybenzene**

<sup>1</sup>H NMR (300 MHz, CDCl<sub>3</sub>)

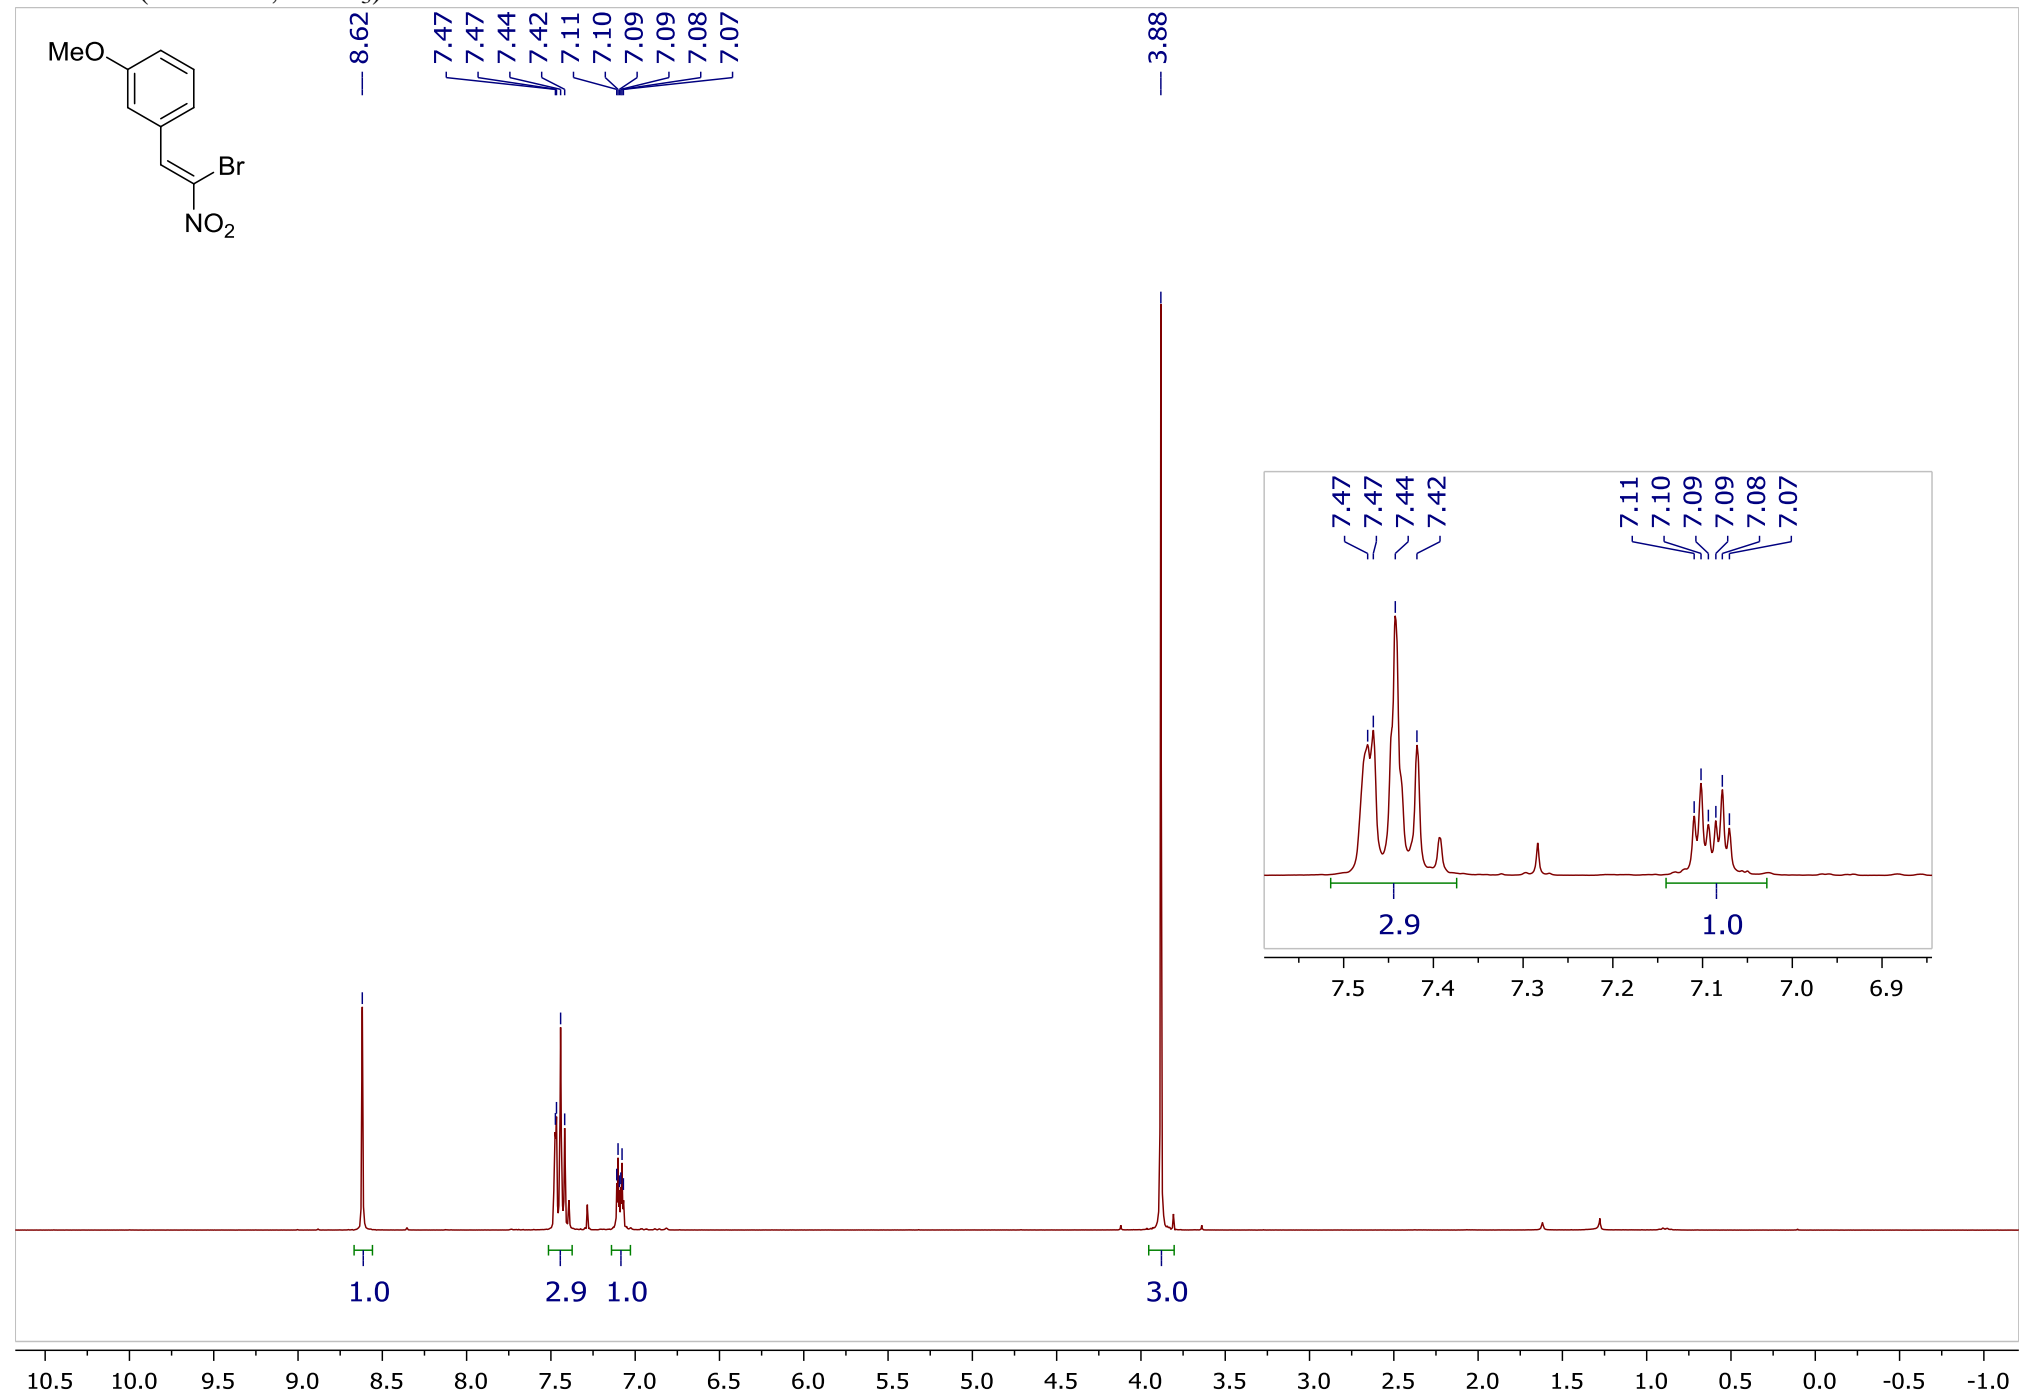



**(Z)-1-(2-Bromo-2-nitrovinyl)-2-methoxybenzene**

<sup>1</sup>H NMR (300 MHz, CDCl<sub>3</sub>)

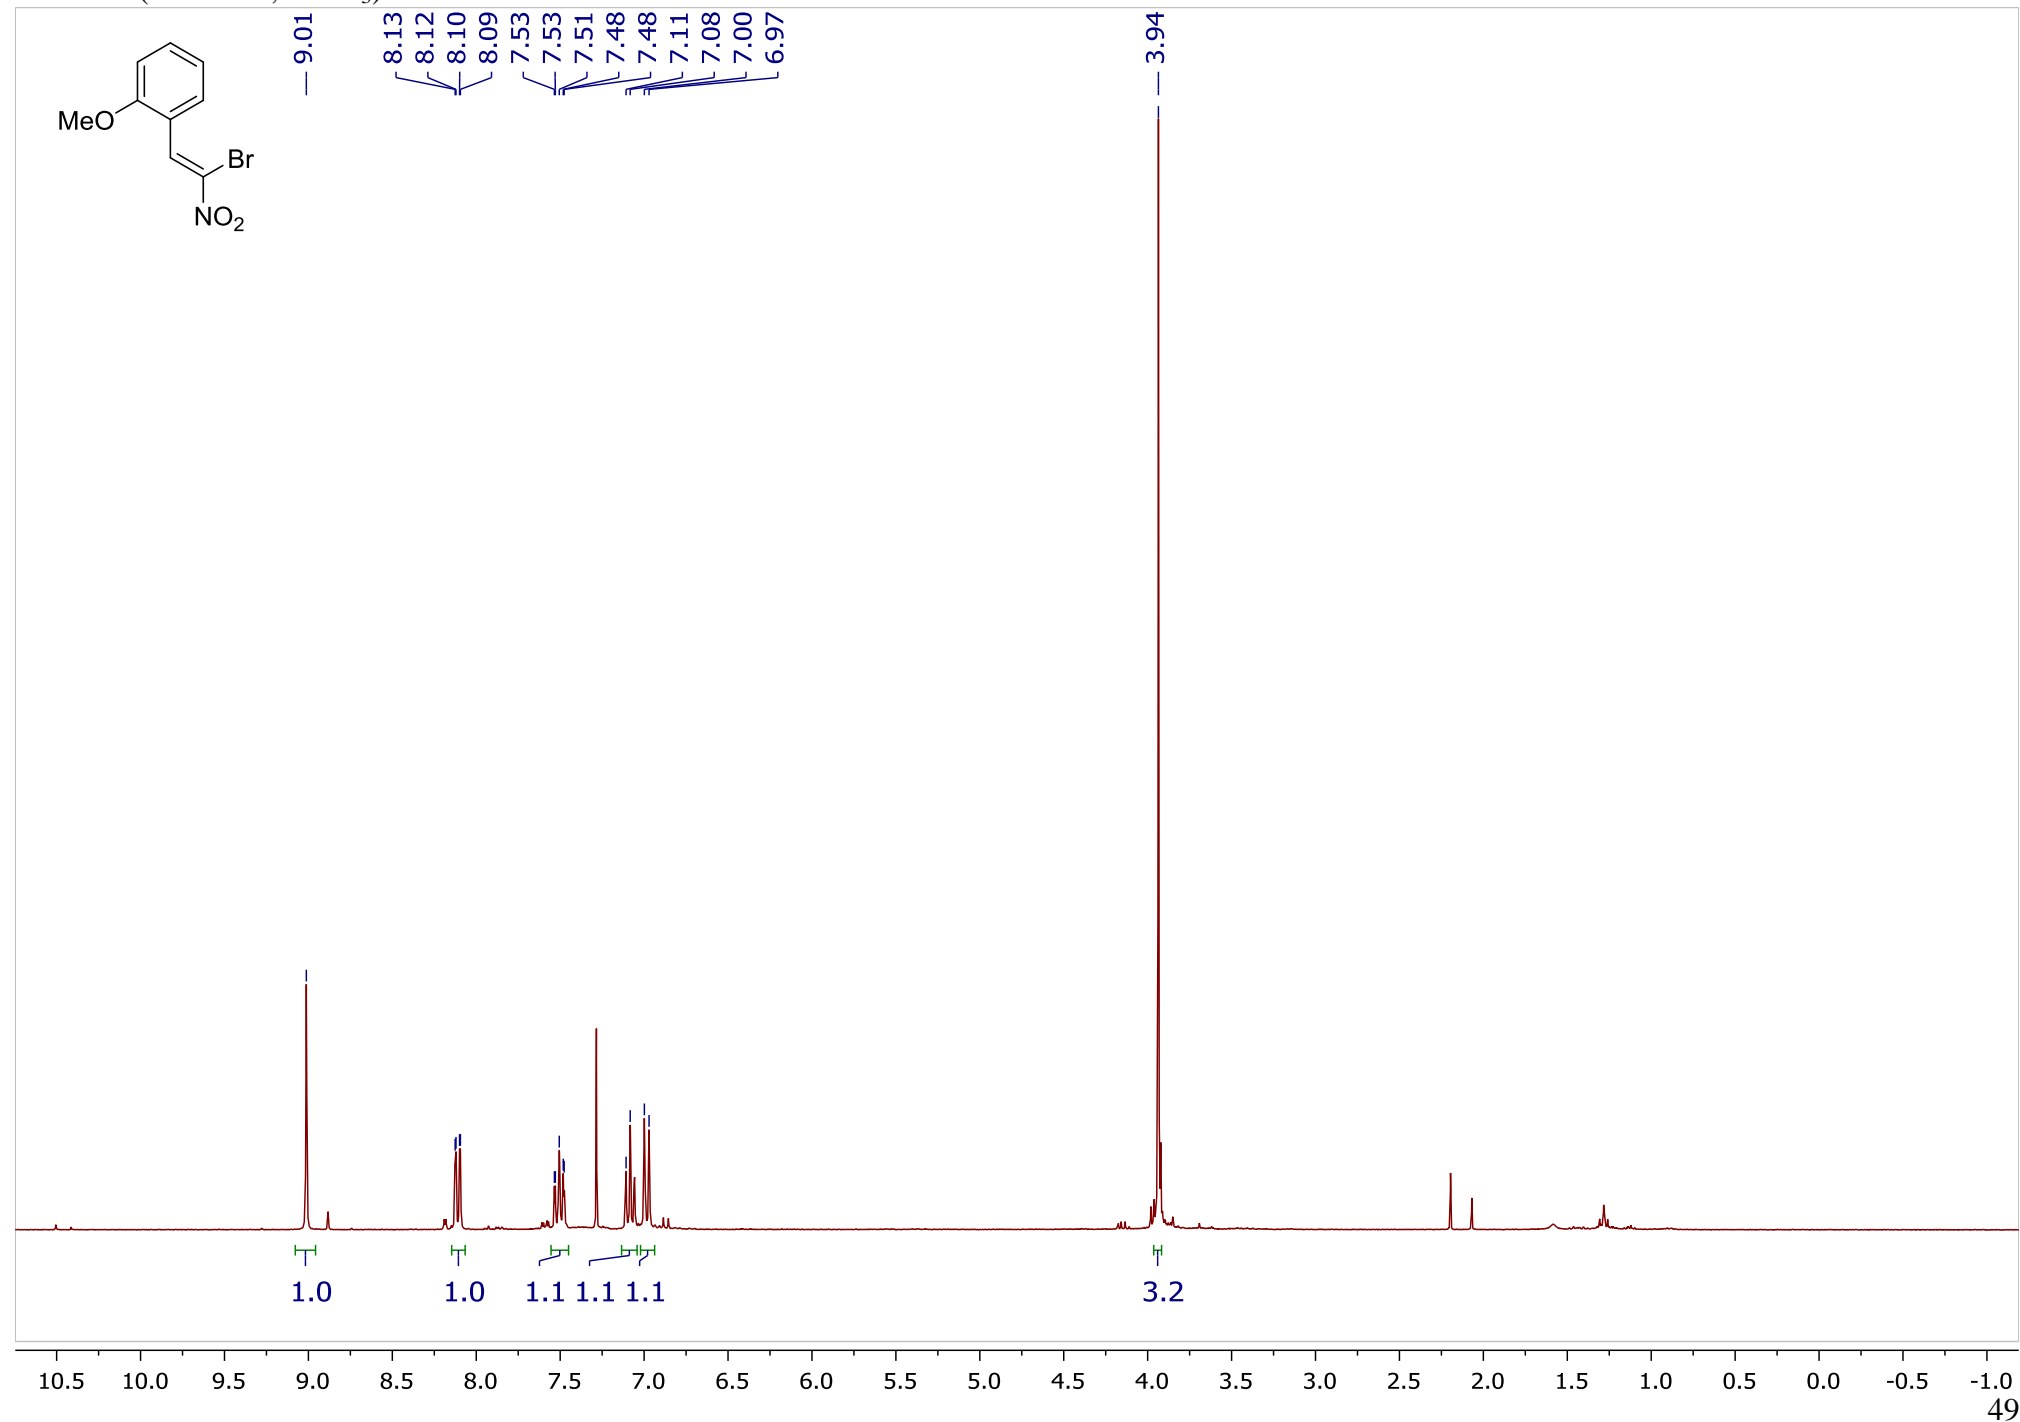

**(Z)-1-(2-Bromo-2-nitrovinyl)naphthalene**

$^1\text{H}$  NMR (300 MHz,  $\text{CDCl}_3$ )

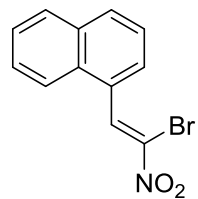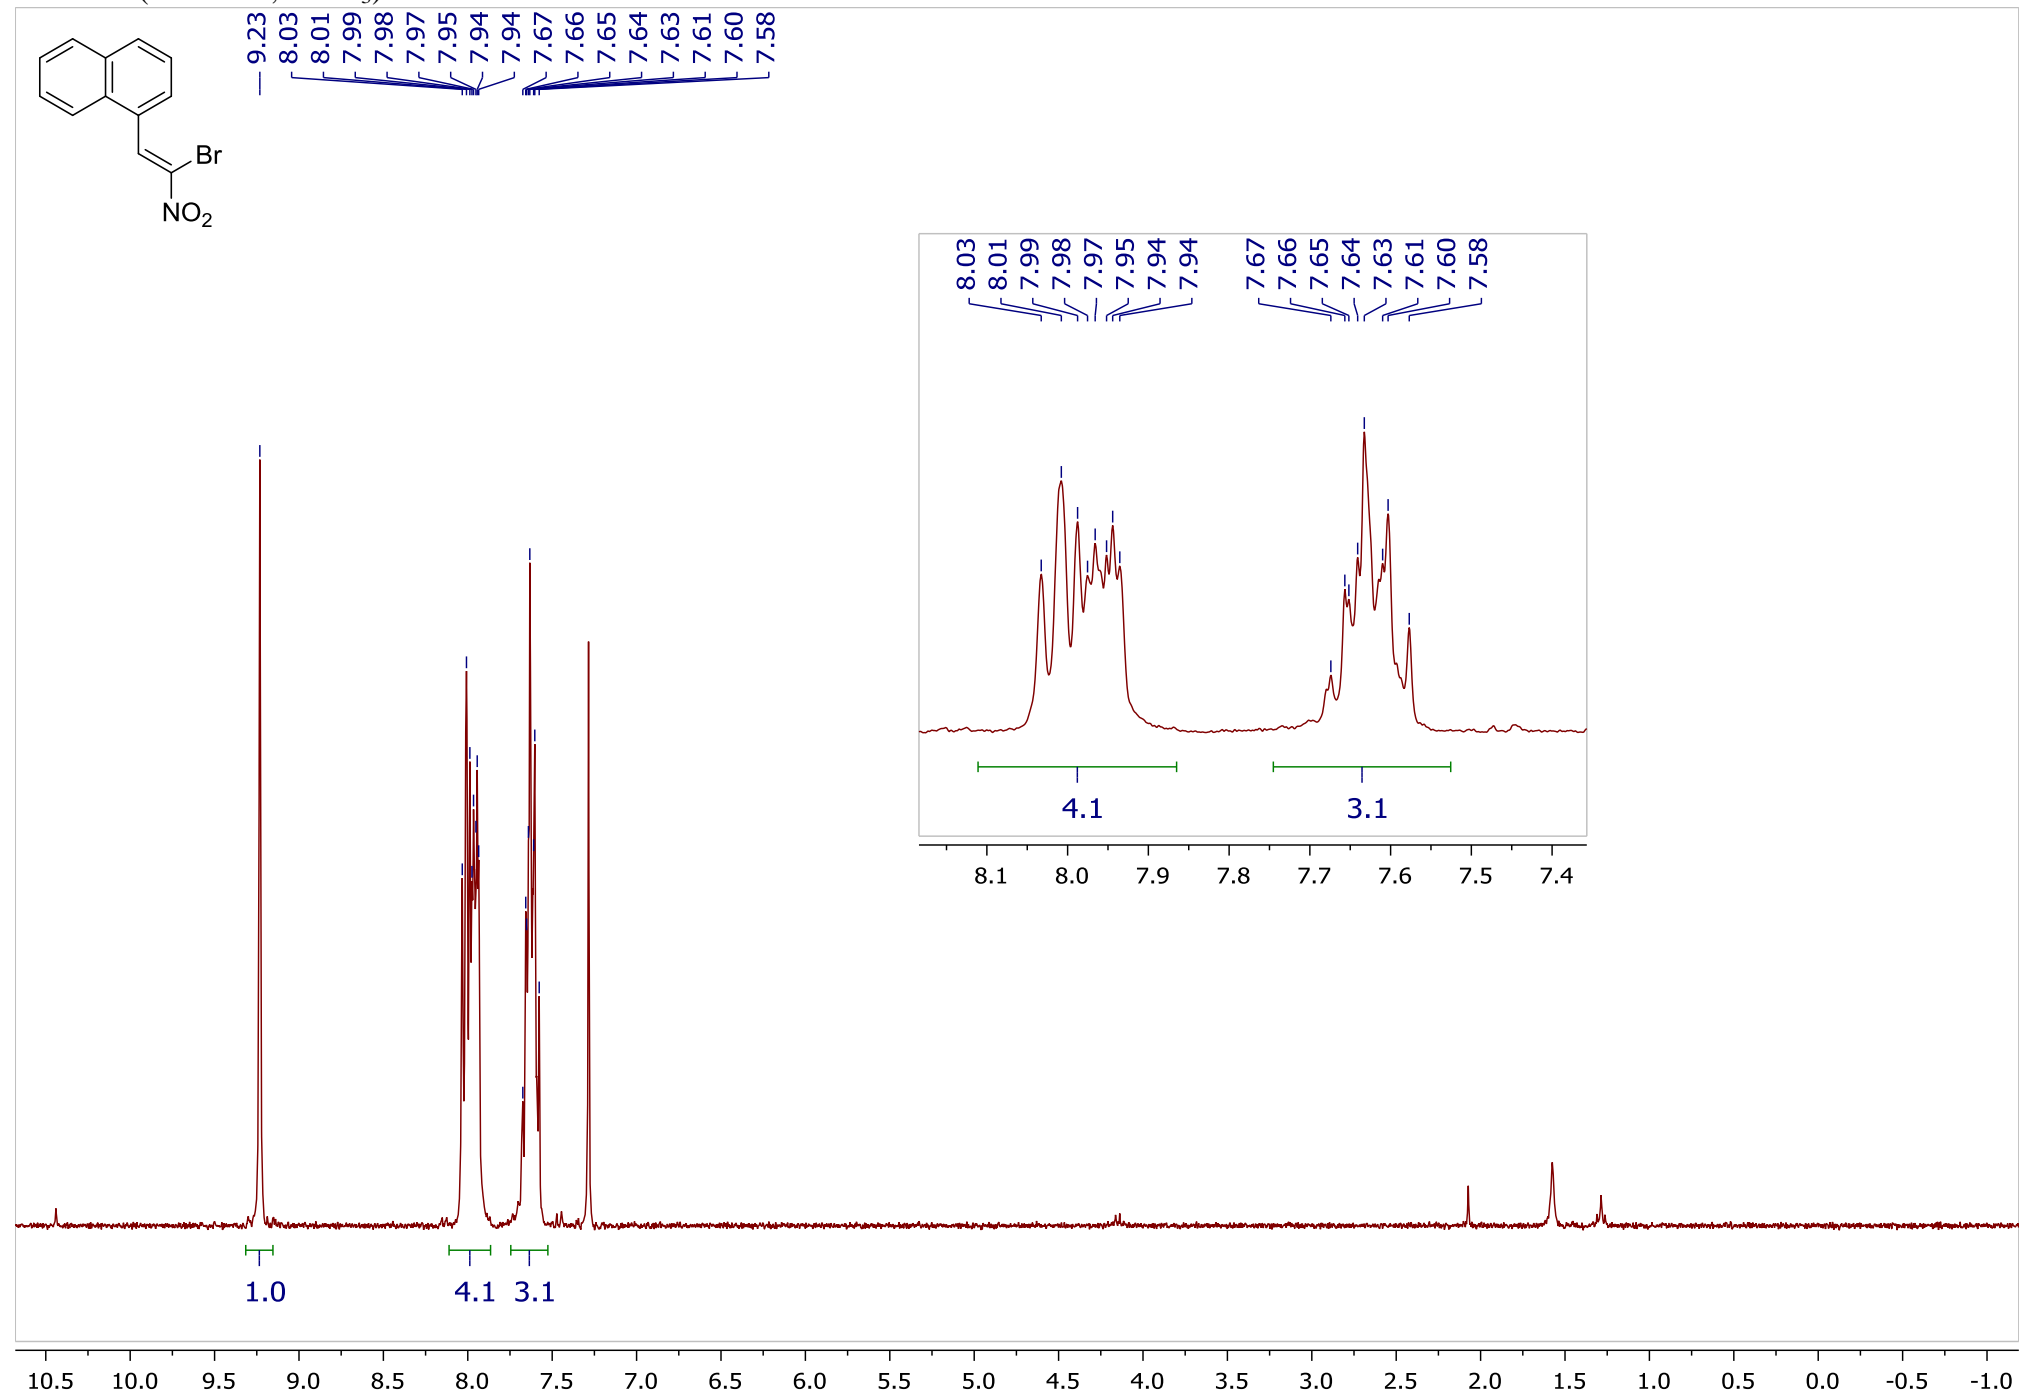

**(Z)-1-Bromo-2-(2-bromo-2-nitrovinyl)-4,5-dimethoxybenzene**

<sup>1</sup>H NMR (300 MHz, CDCl<sub>3</sub>)

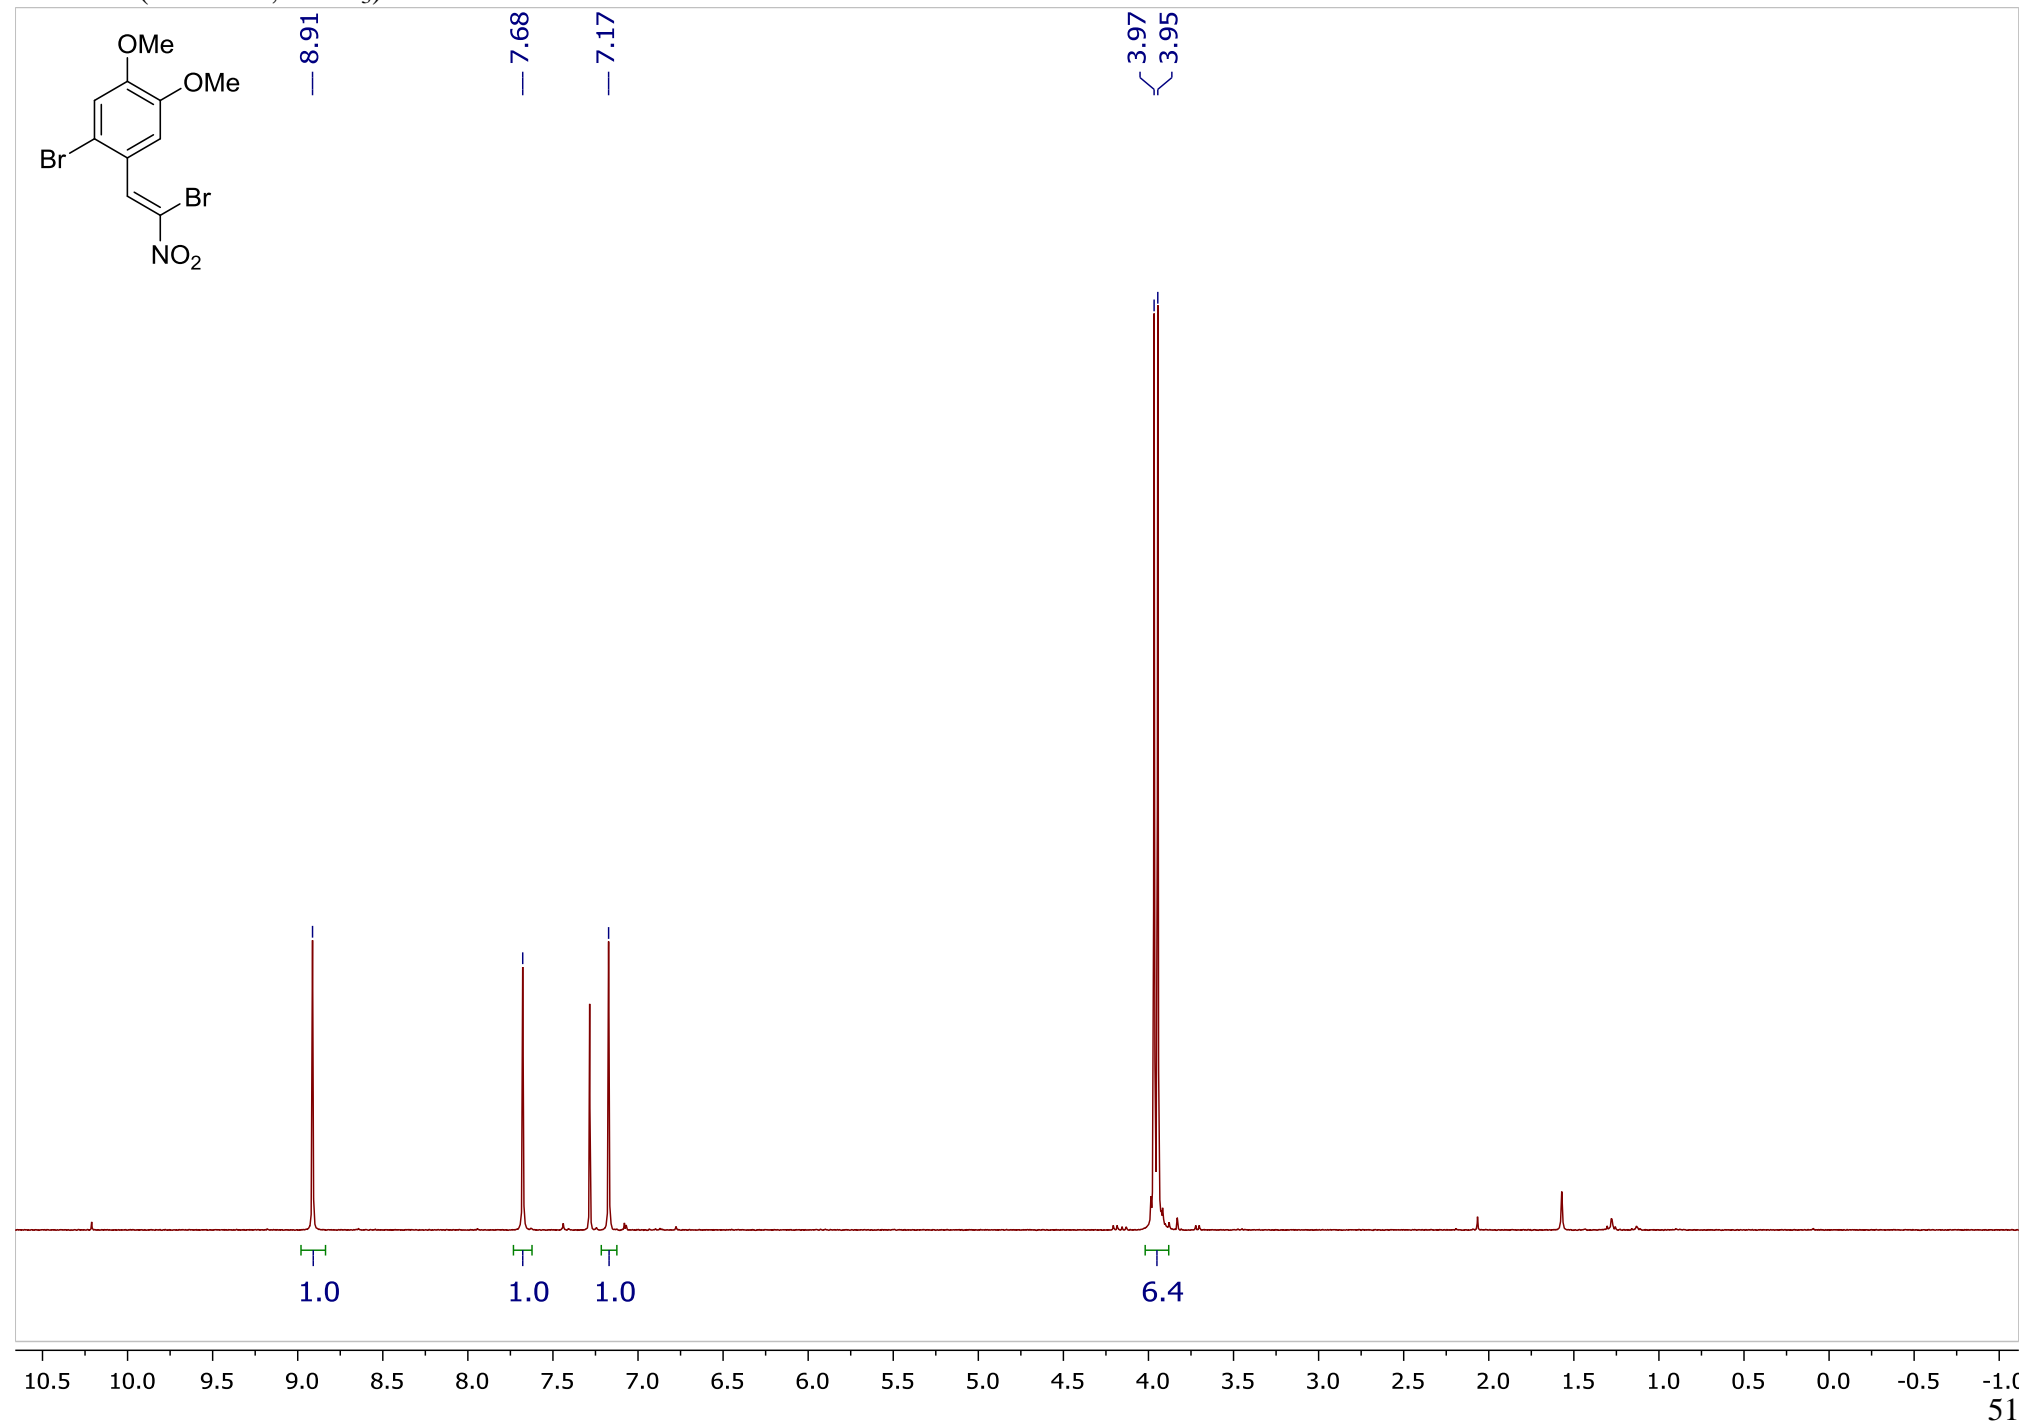

**(Z)-(2-Bromo-2-nitrovinyl)cyclopropane**

<sup>1</sup>H NMR (300 MHz, CDCl<sub>3</sub>)

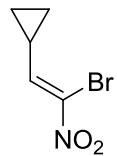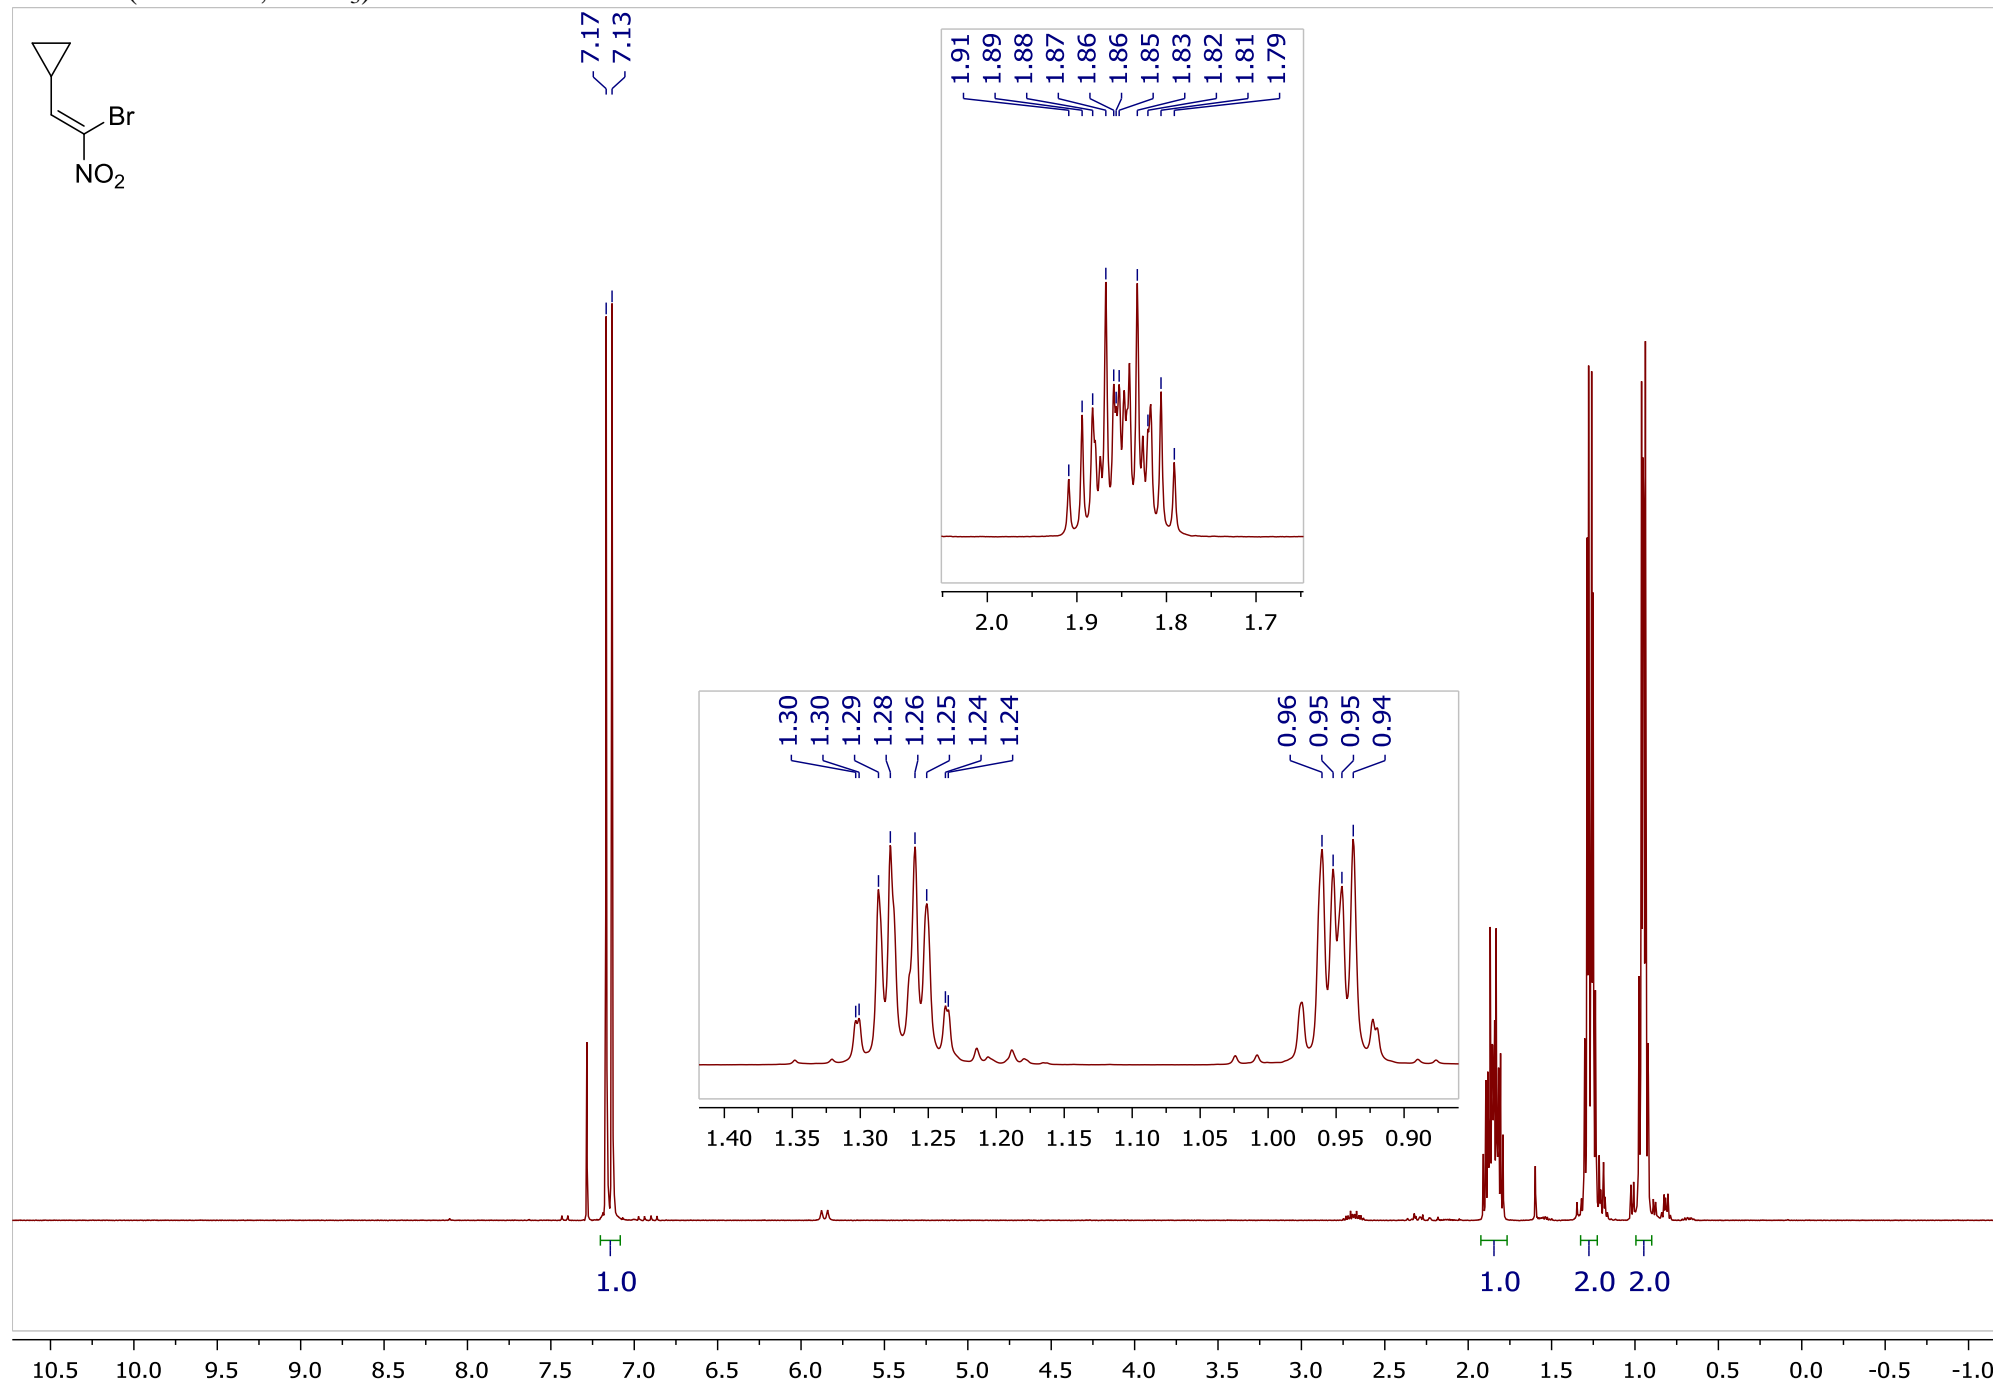

$^{13}\text{C}\{^1\text{H}\}$  NMR (75 MHz,  $\text{CDCl}_3$ )

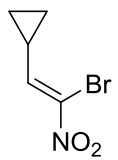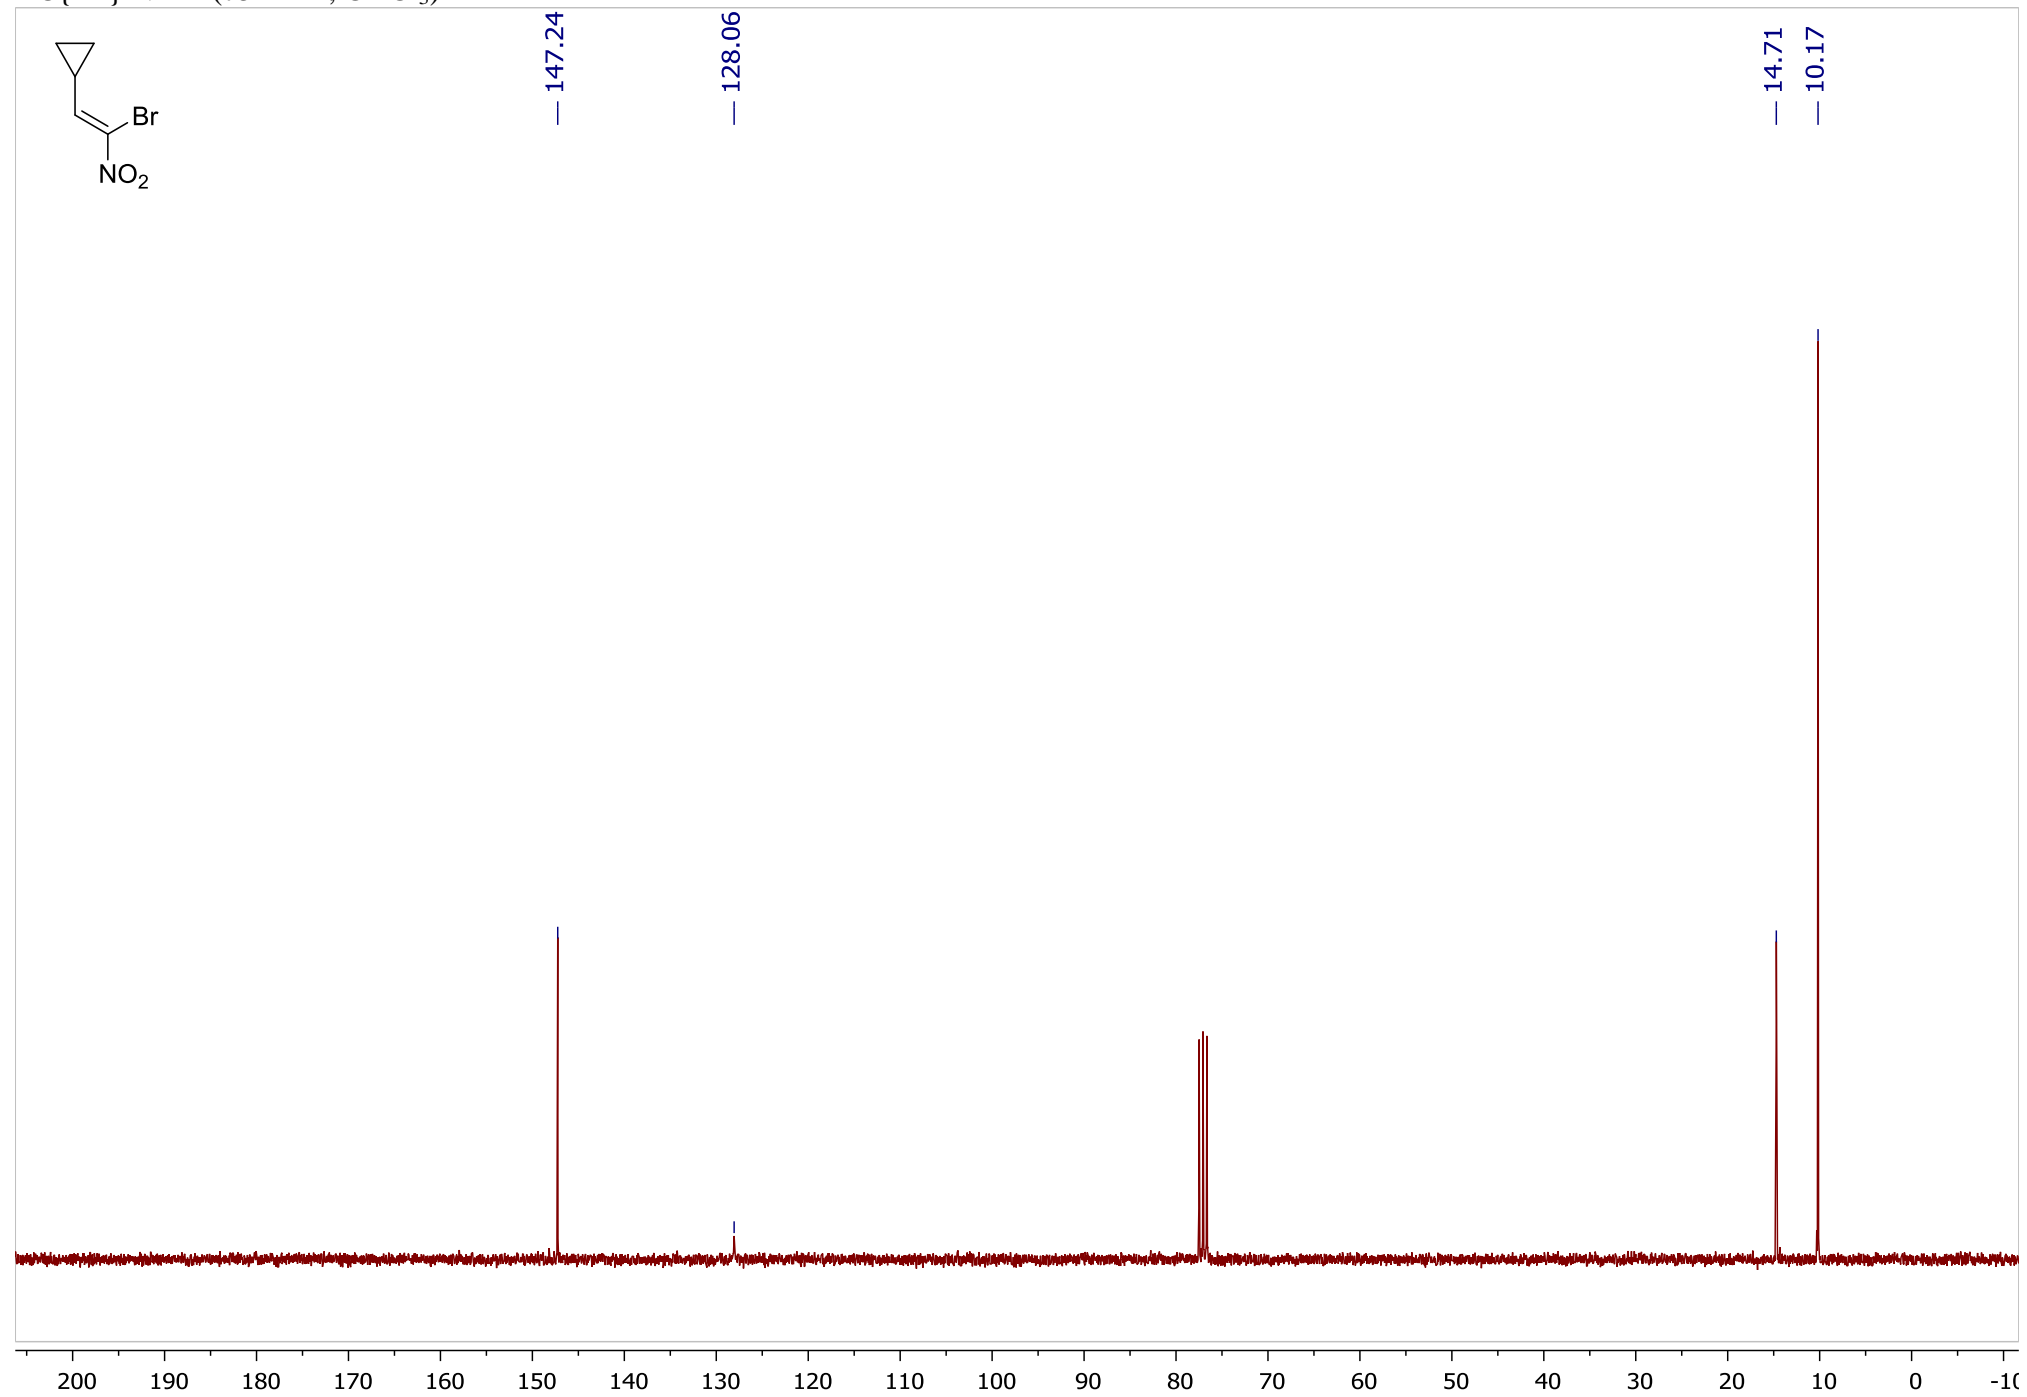

$^{13}\text{C}$  DEPT 135 (75 MHz,  $\text{CDCl}_3$ )

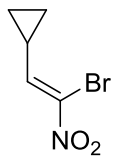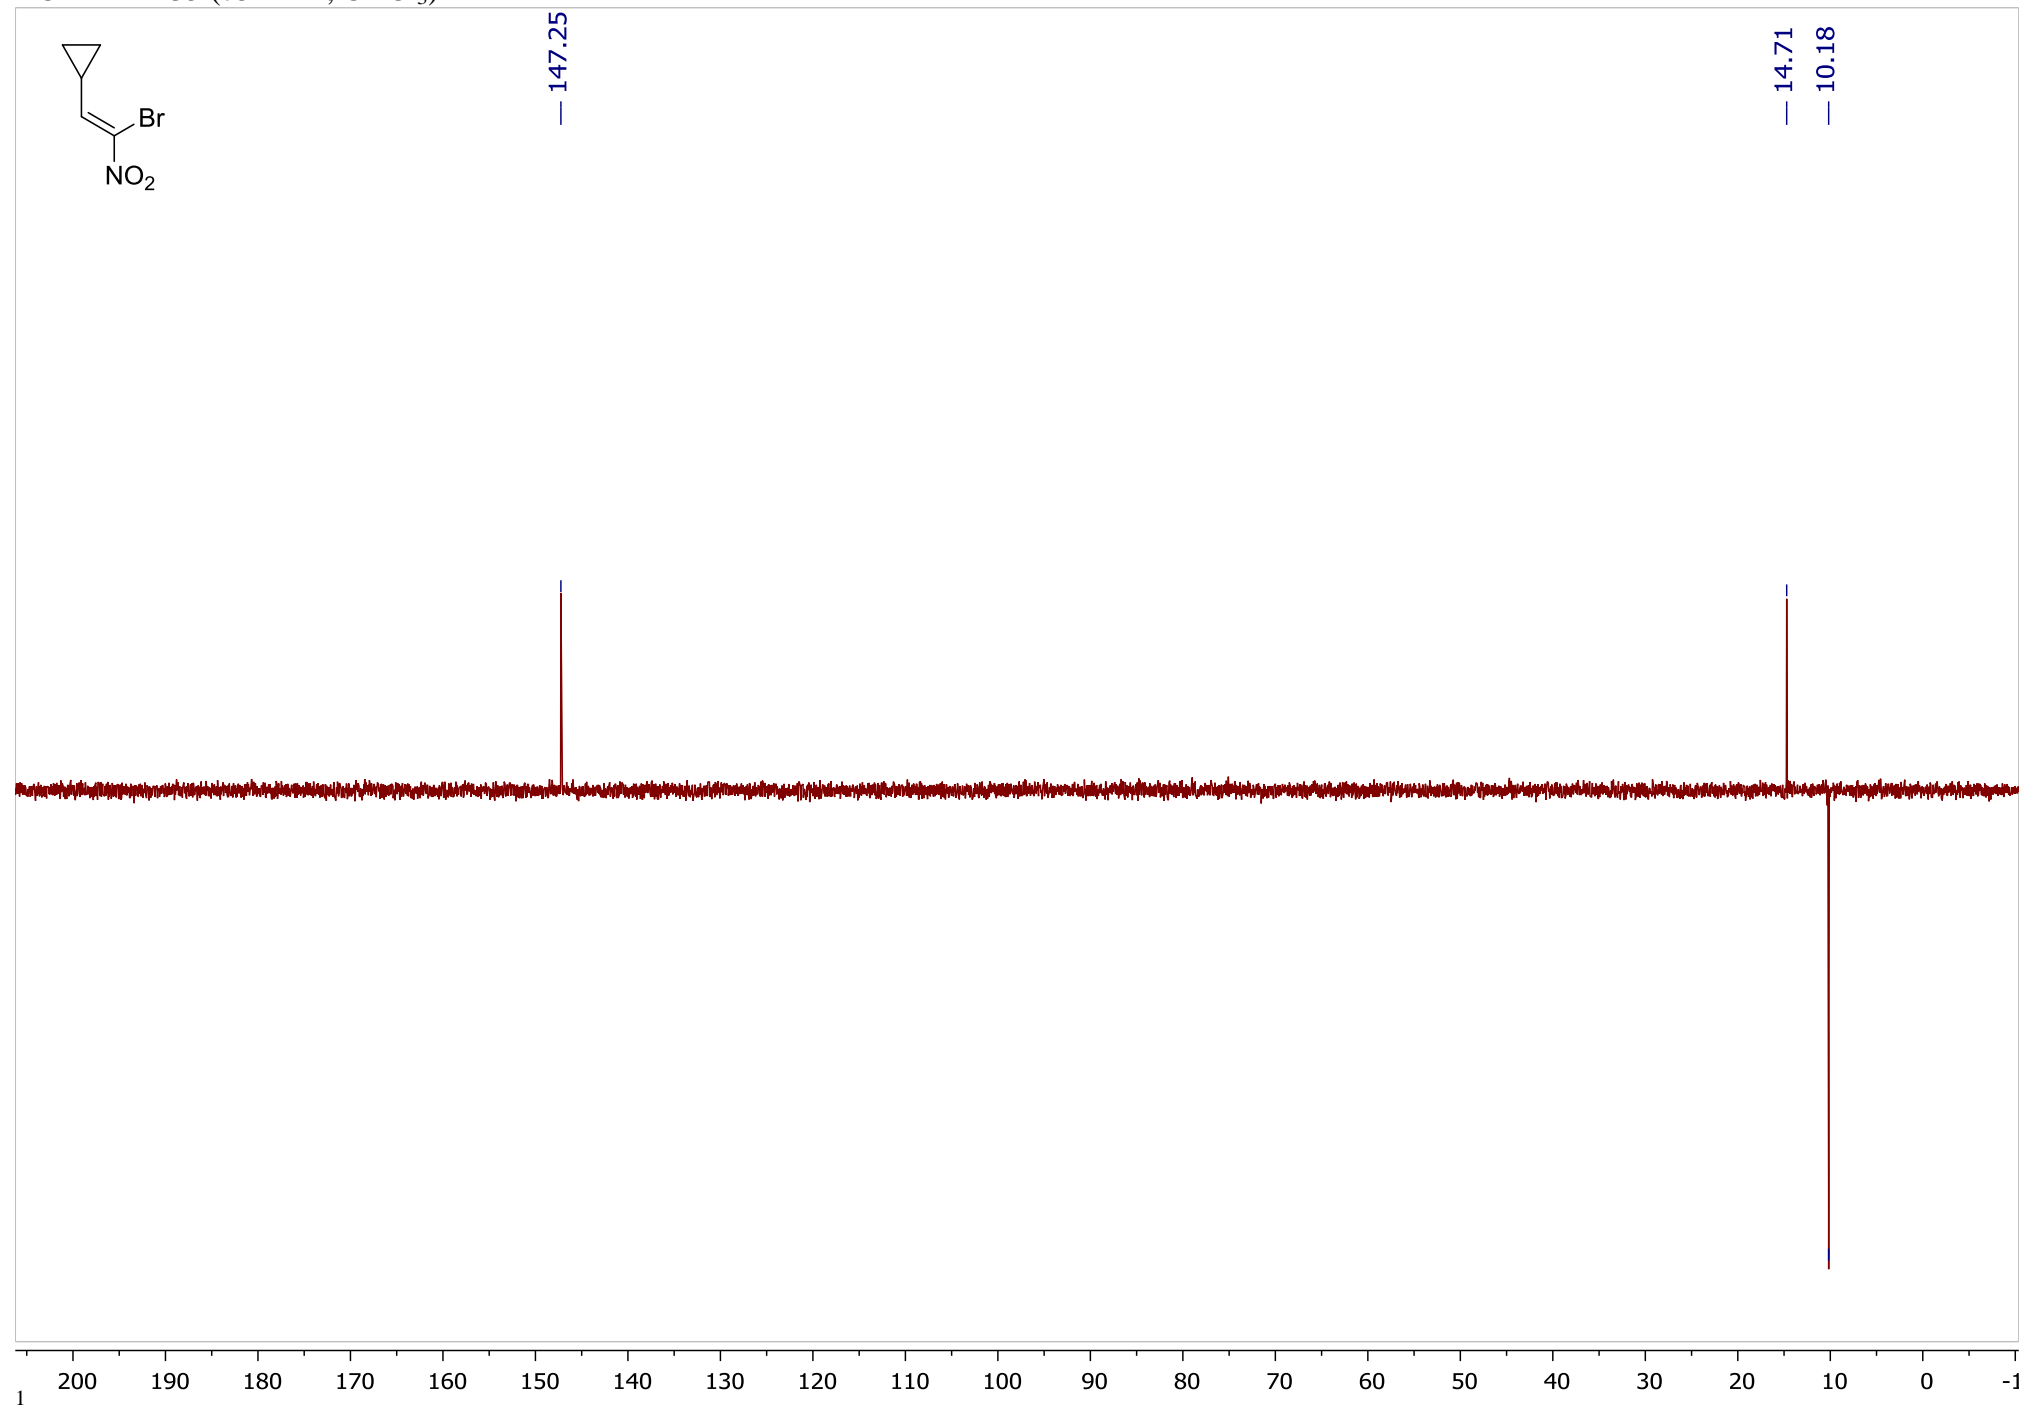

$^1\text{H}-^{13}\text{C}$  HMBC

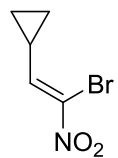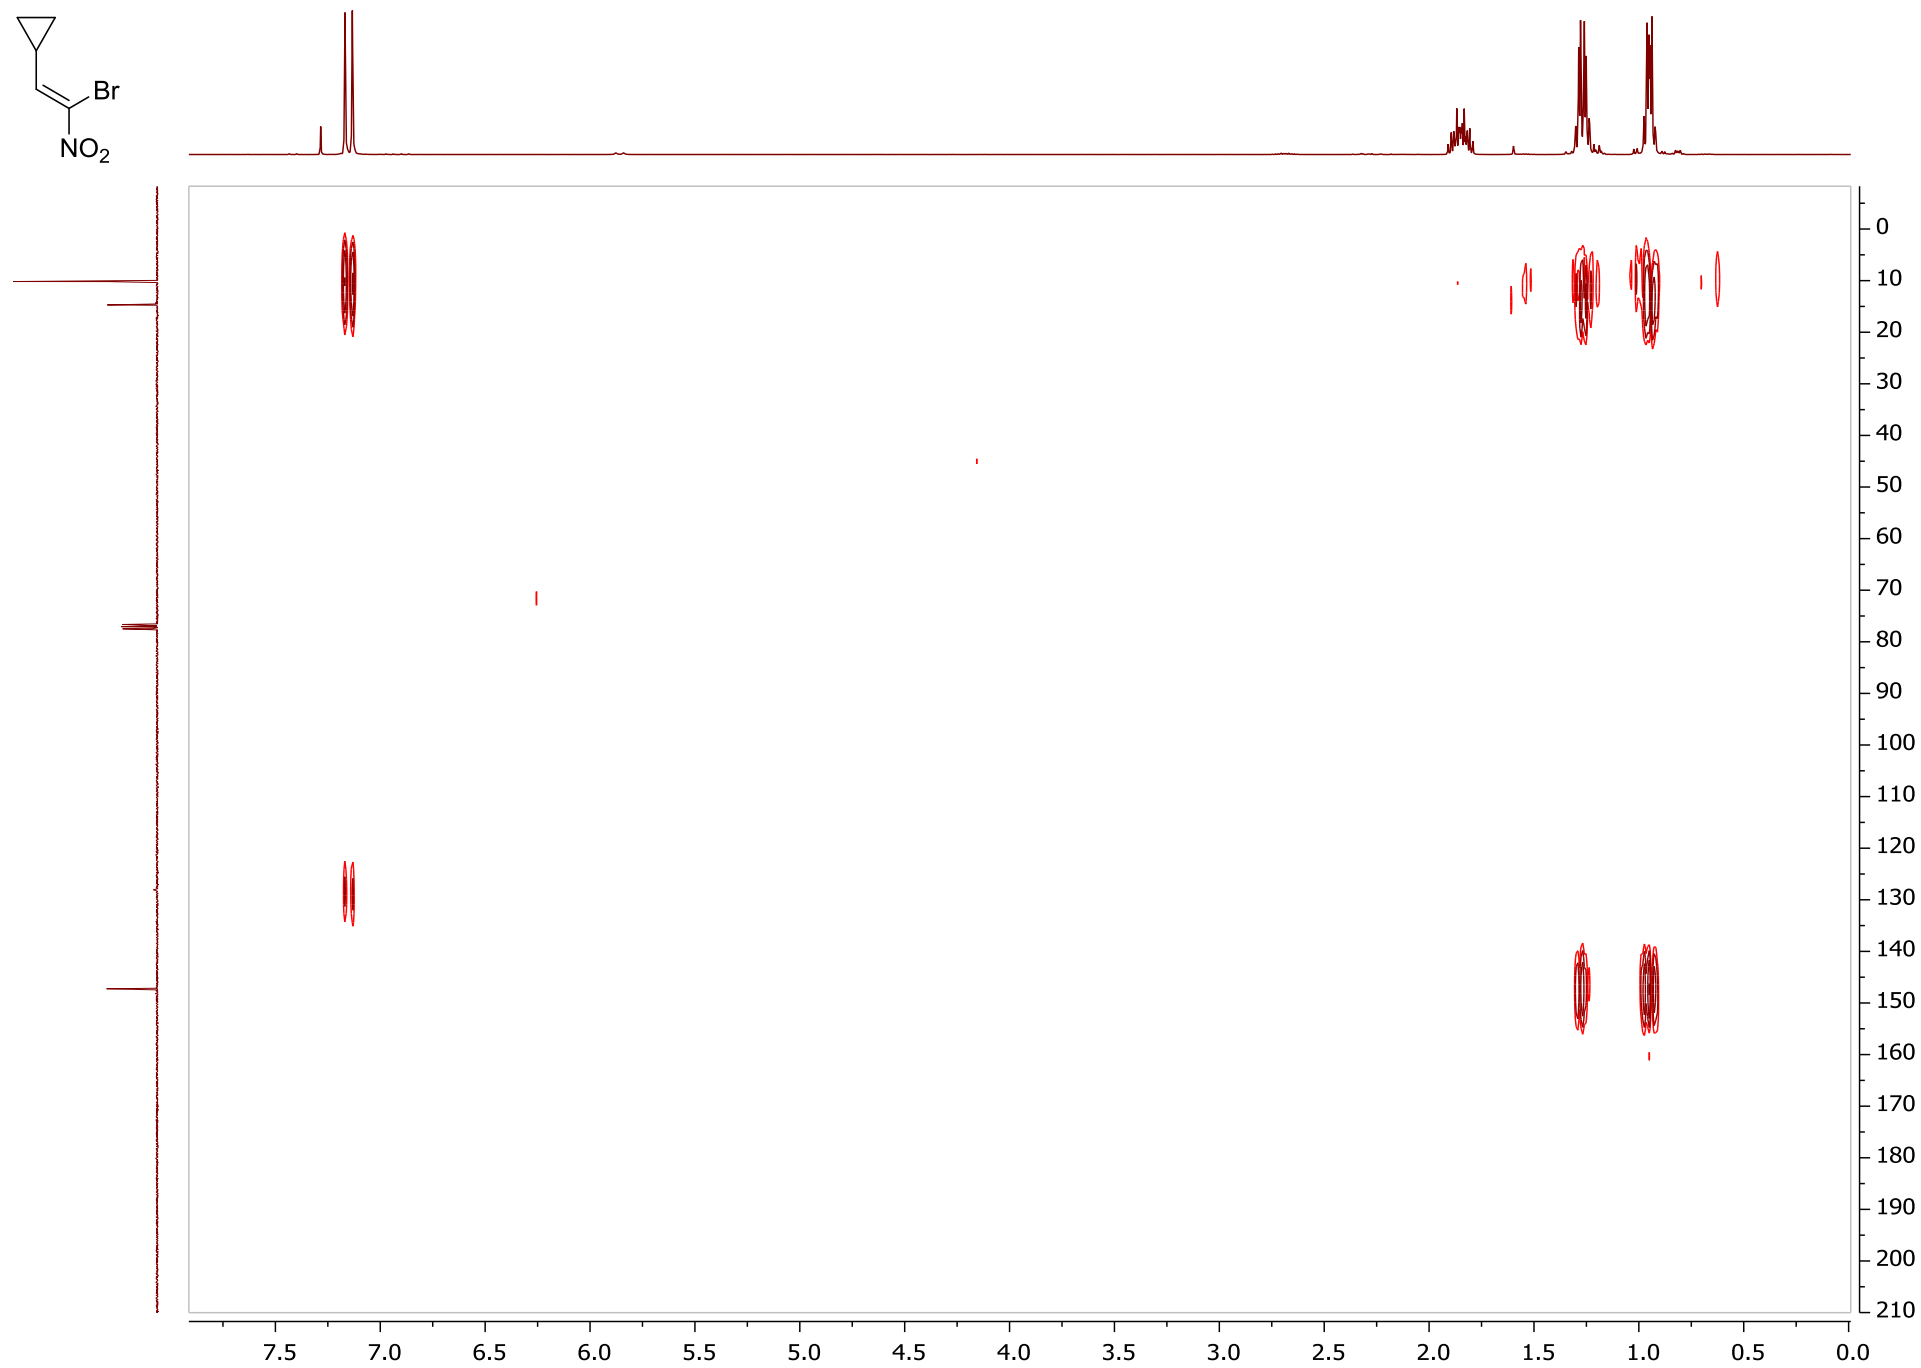

**3-Bromo-4-(4-methoxyphenyl)-6,6-dimethyl-5,6-dihydro-4H-1,2-oxazine 2-oxide 2a**

<sup>1</sup>H NMR (300 MHz, CDCl<sub>3</sub>)

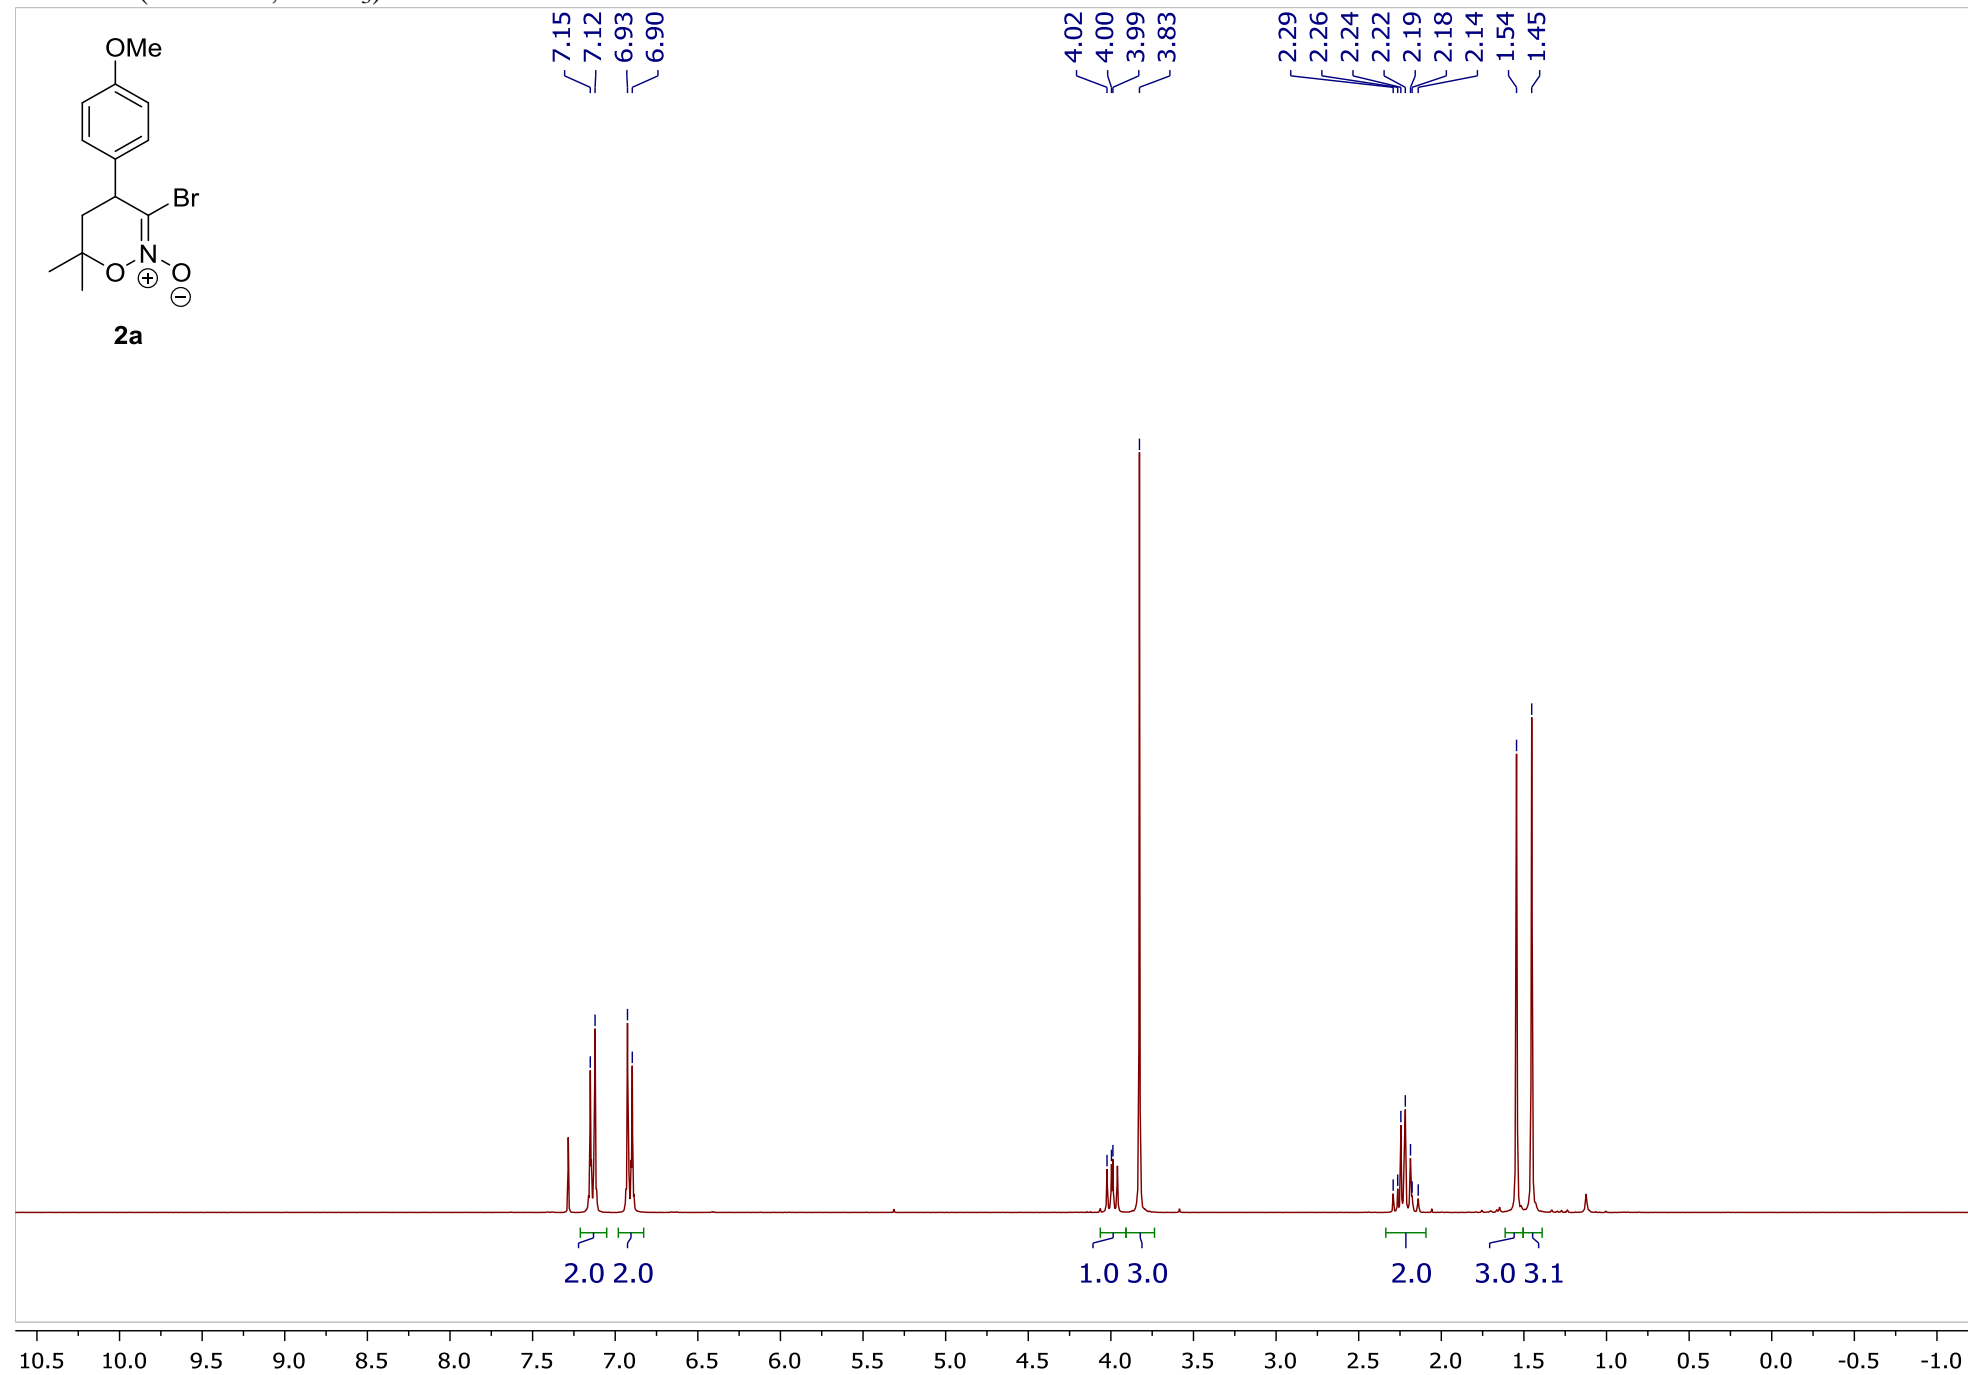



**3-Bromo-4-(4-bromophenyl)-6,6-dimethyl-5,6-dihydro-4H-1,2-oxazine 2-oxide 2b**

<sup>1</sup>H NMR (300 MHz, CDCl<sub>3</sub>)

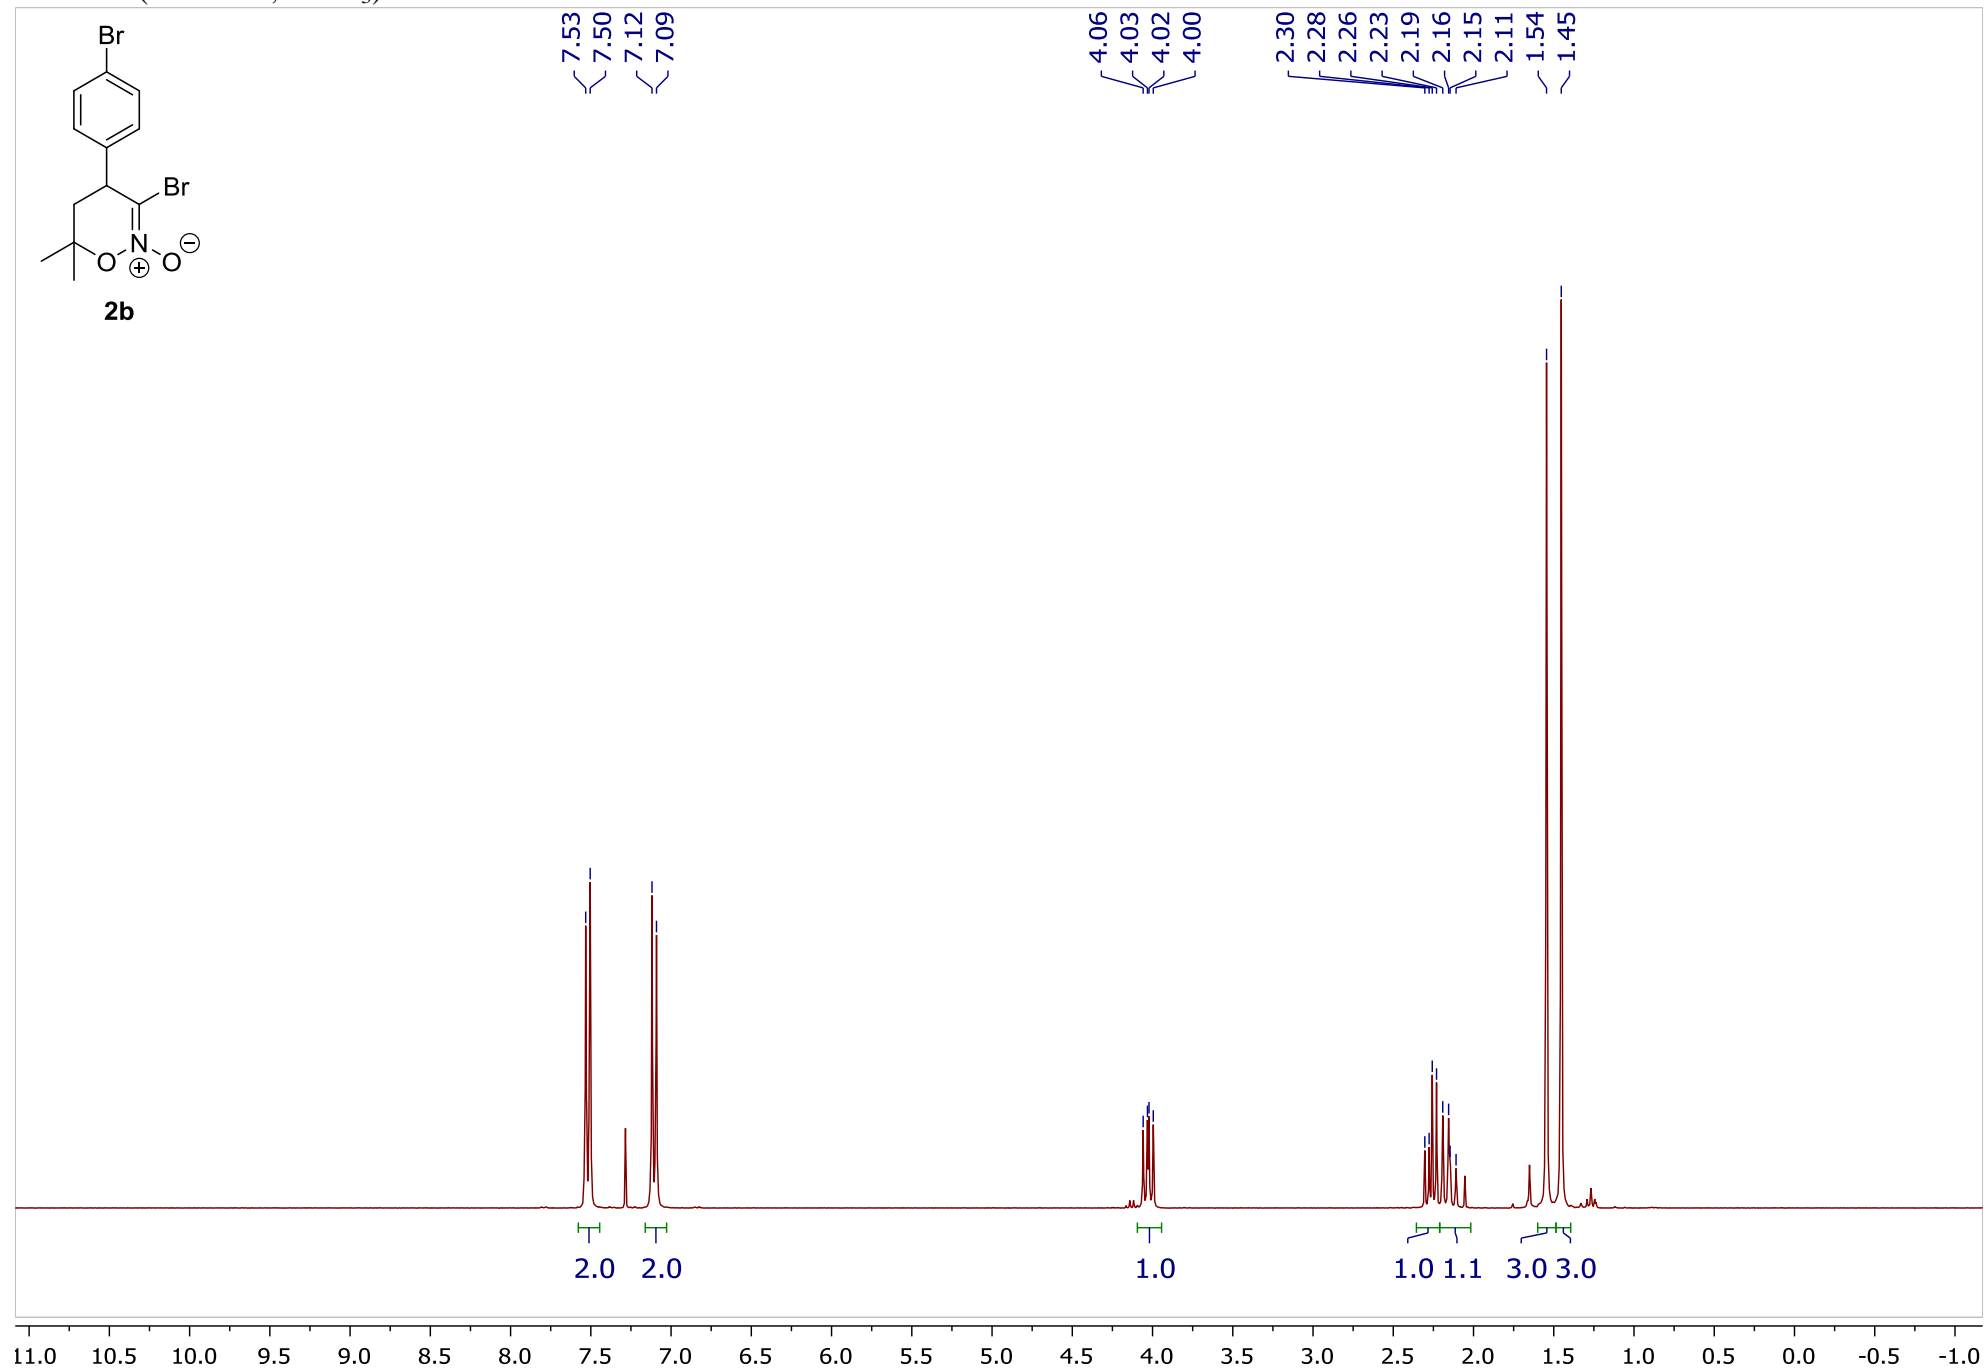

$^{13}\text{C}\{^1\text{H}\}$  NMR (75 MHz,  $\text{CDCl}_3$ )

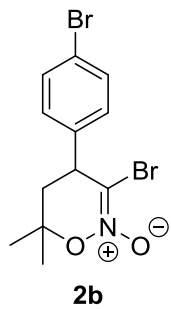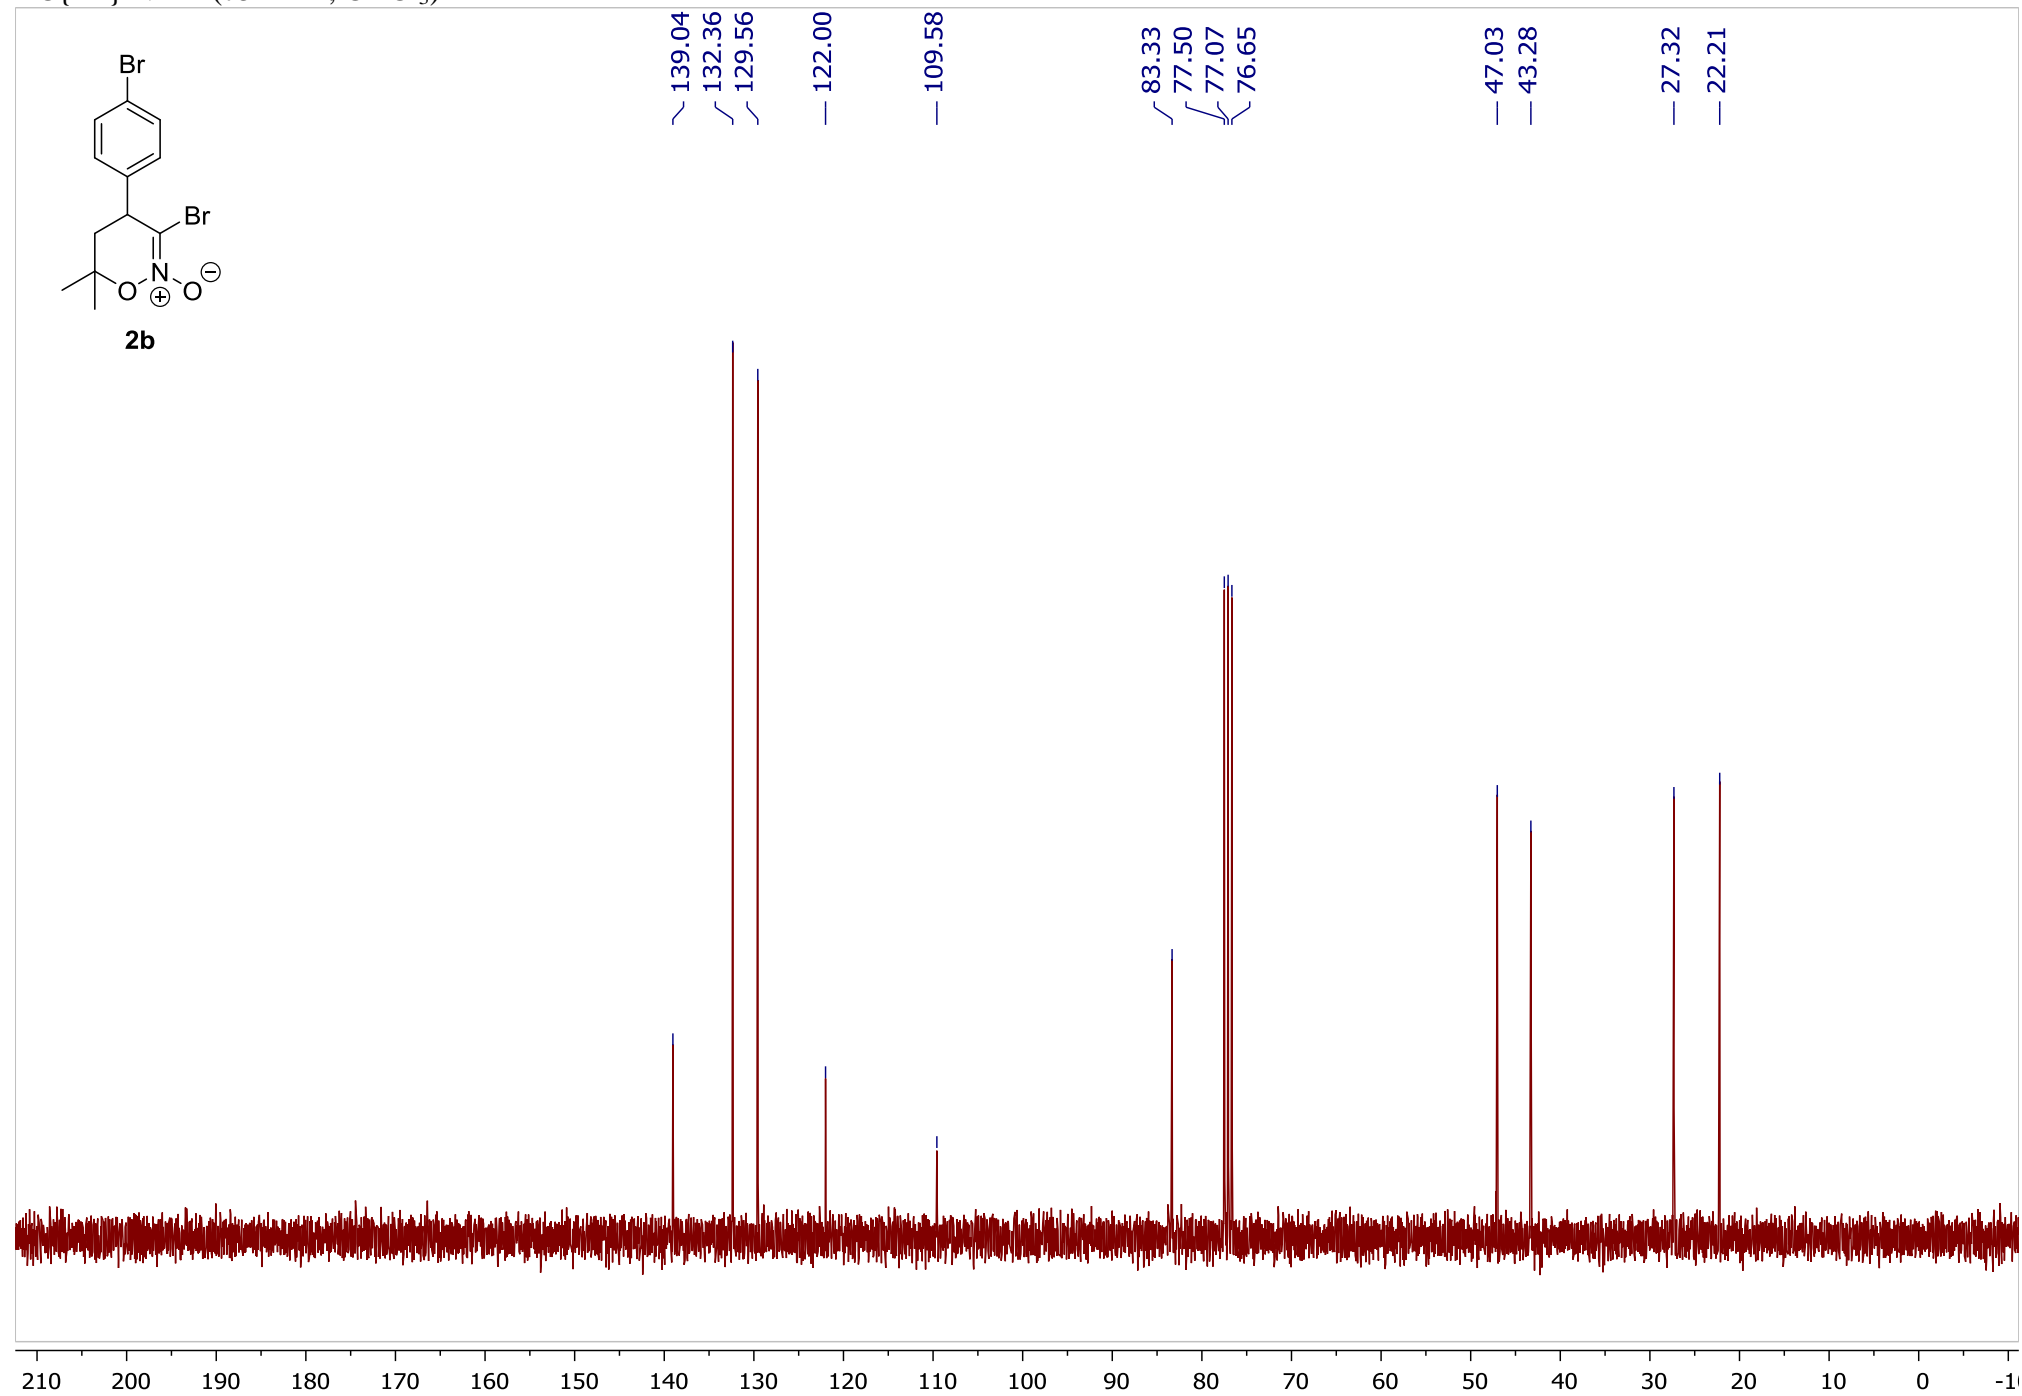

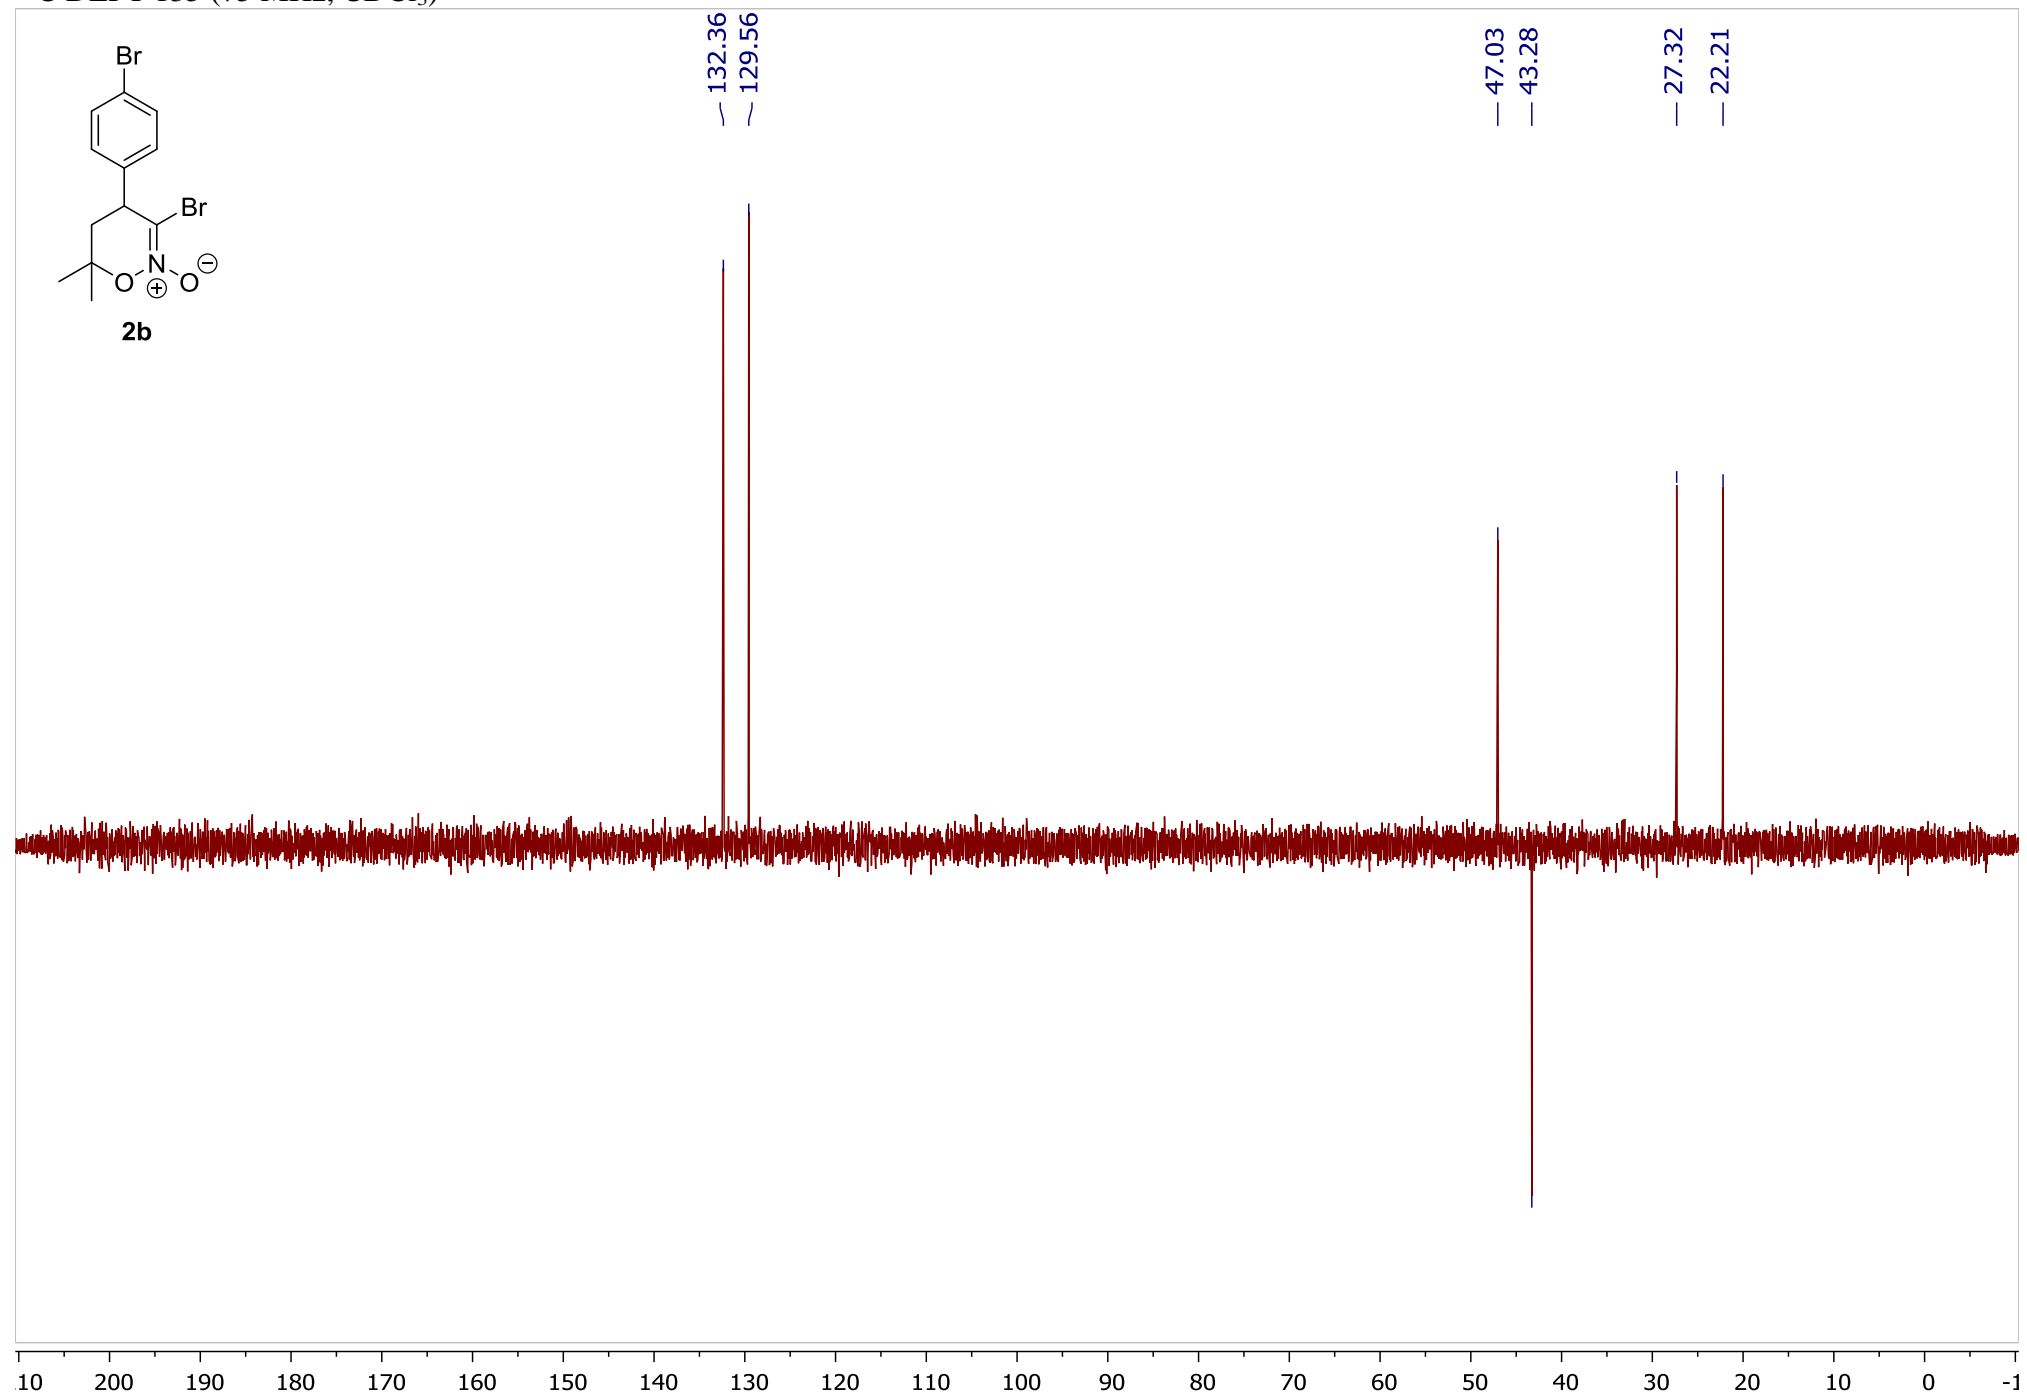

**3-Bromo-4-(4-chlorophenyl)-6,6-dimethyl-5,6-dihydro-4H-1,2-oxazine 2-oxide 2c**

<sup>1</sup>H NMR (300 MHz, CDCl<sub>3</sub>)

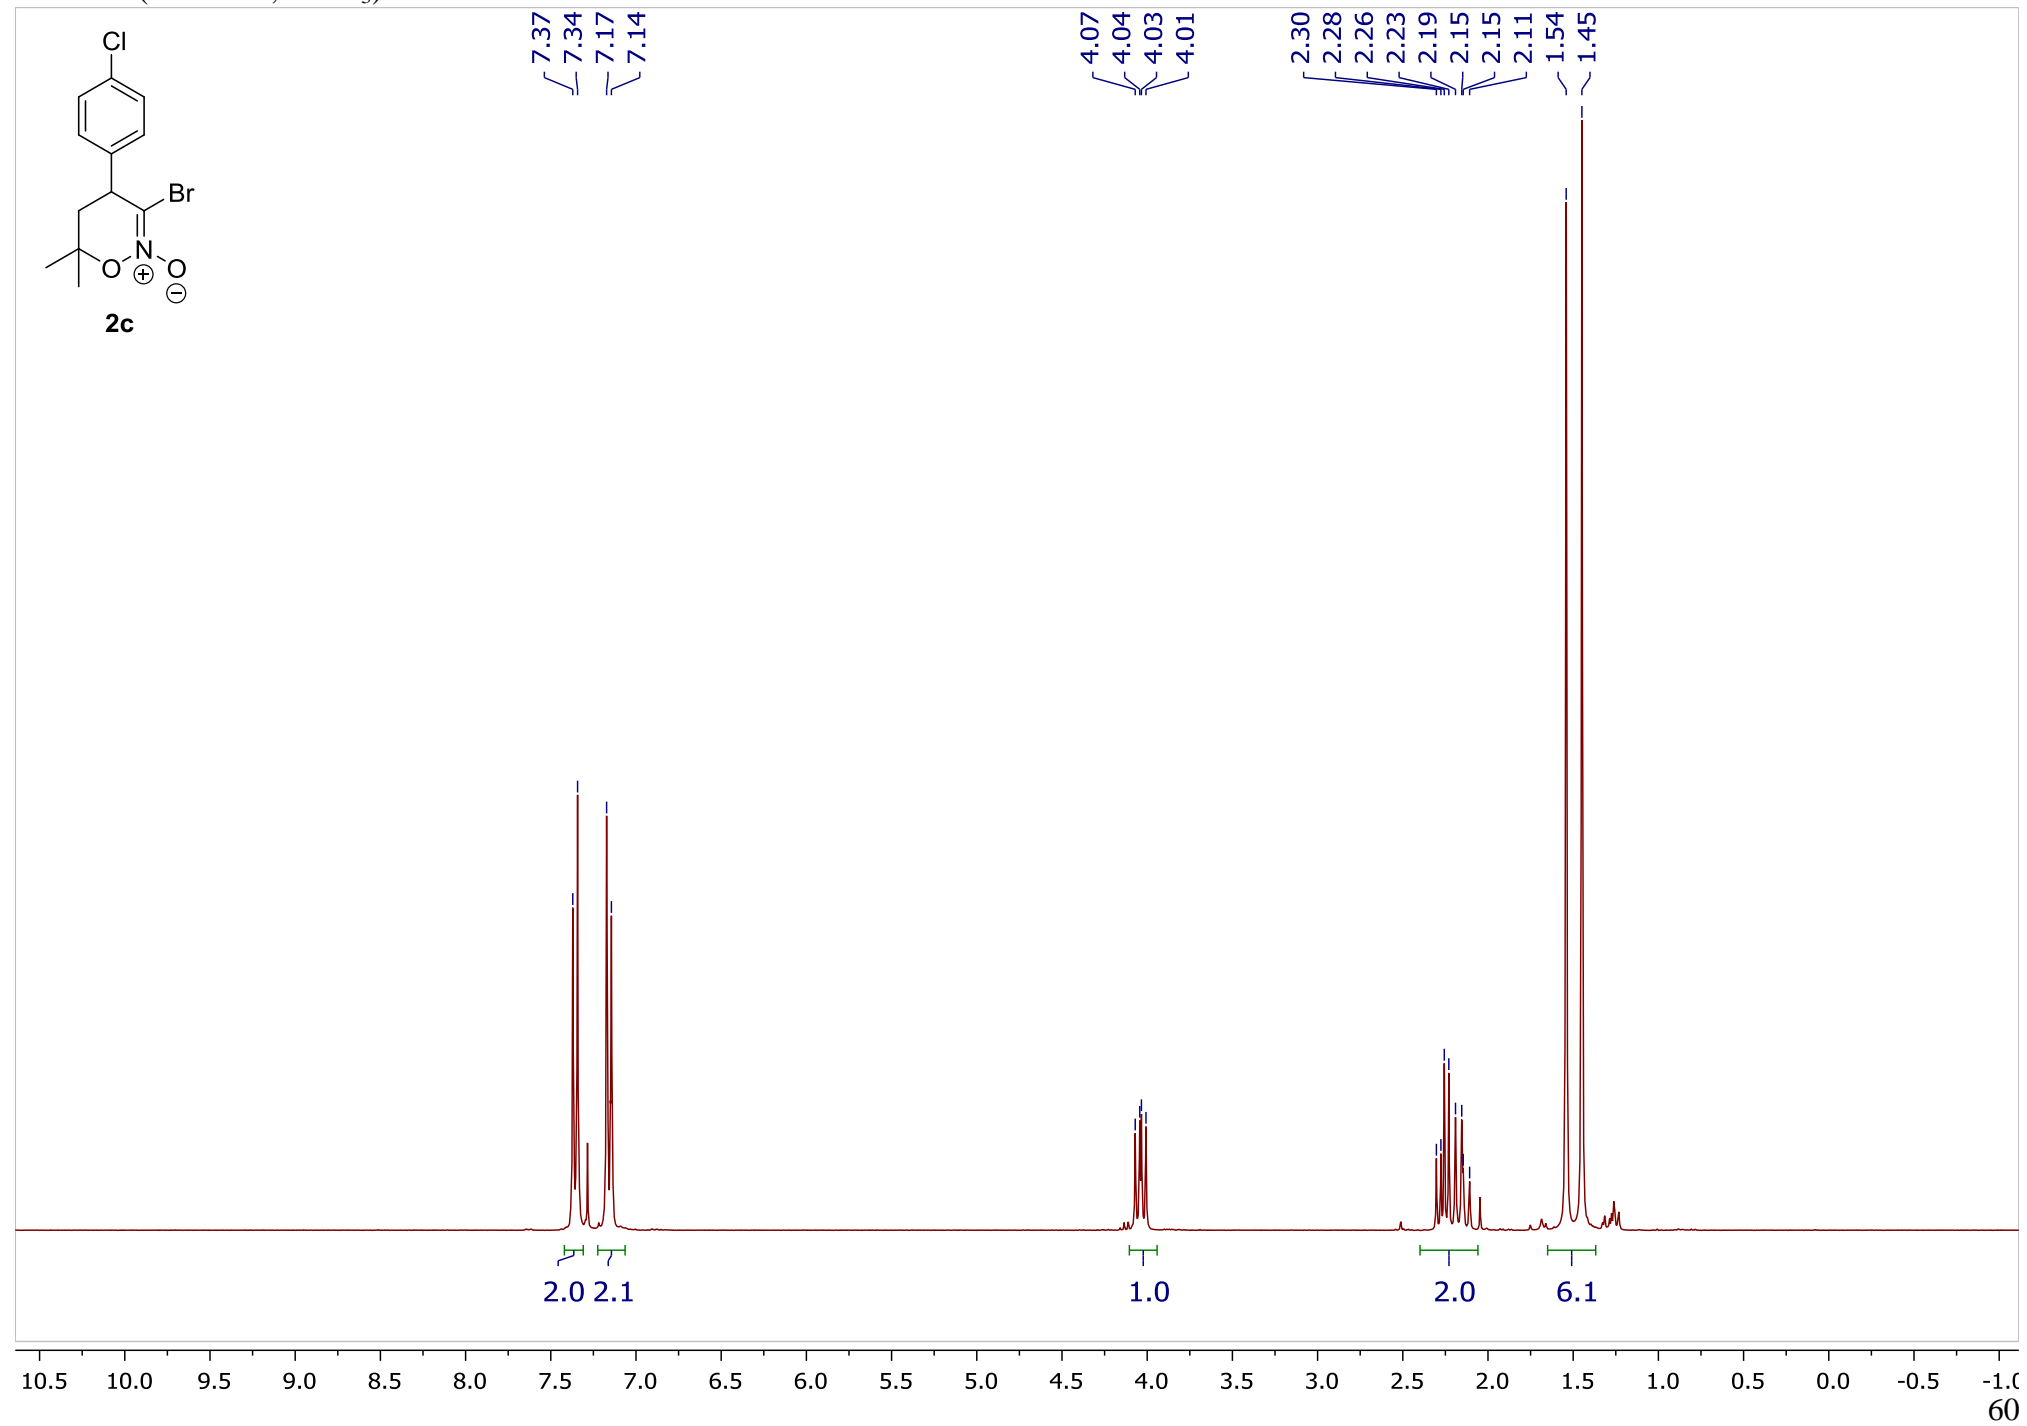

$^{13}\text{C}\{^1\text{H}\}$  NMR (75 MHz,  $\text{CDCl}_3$ )

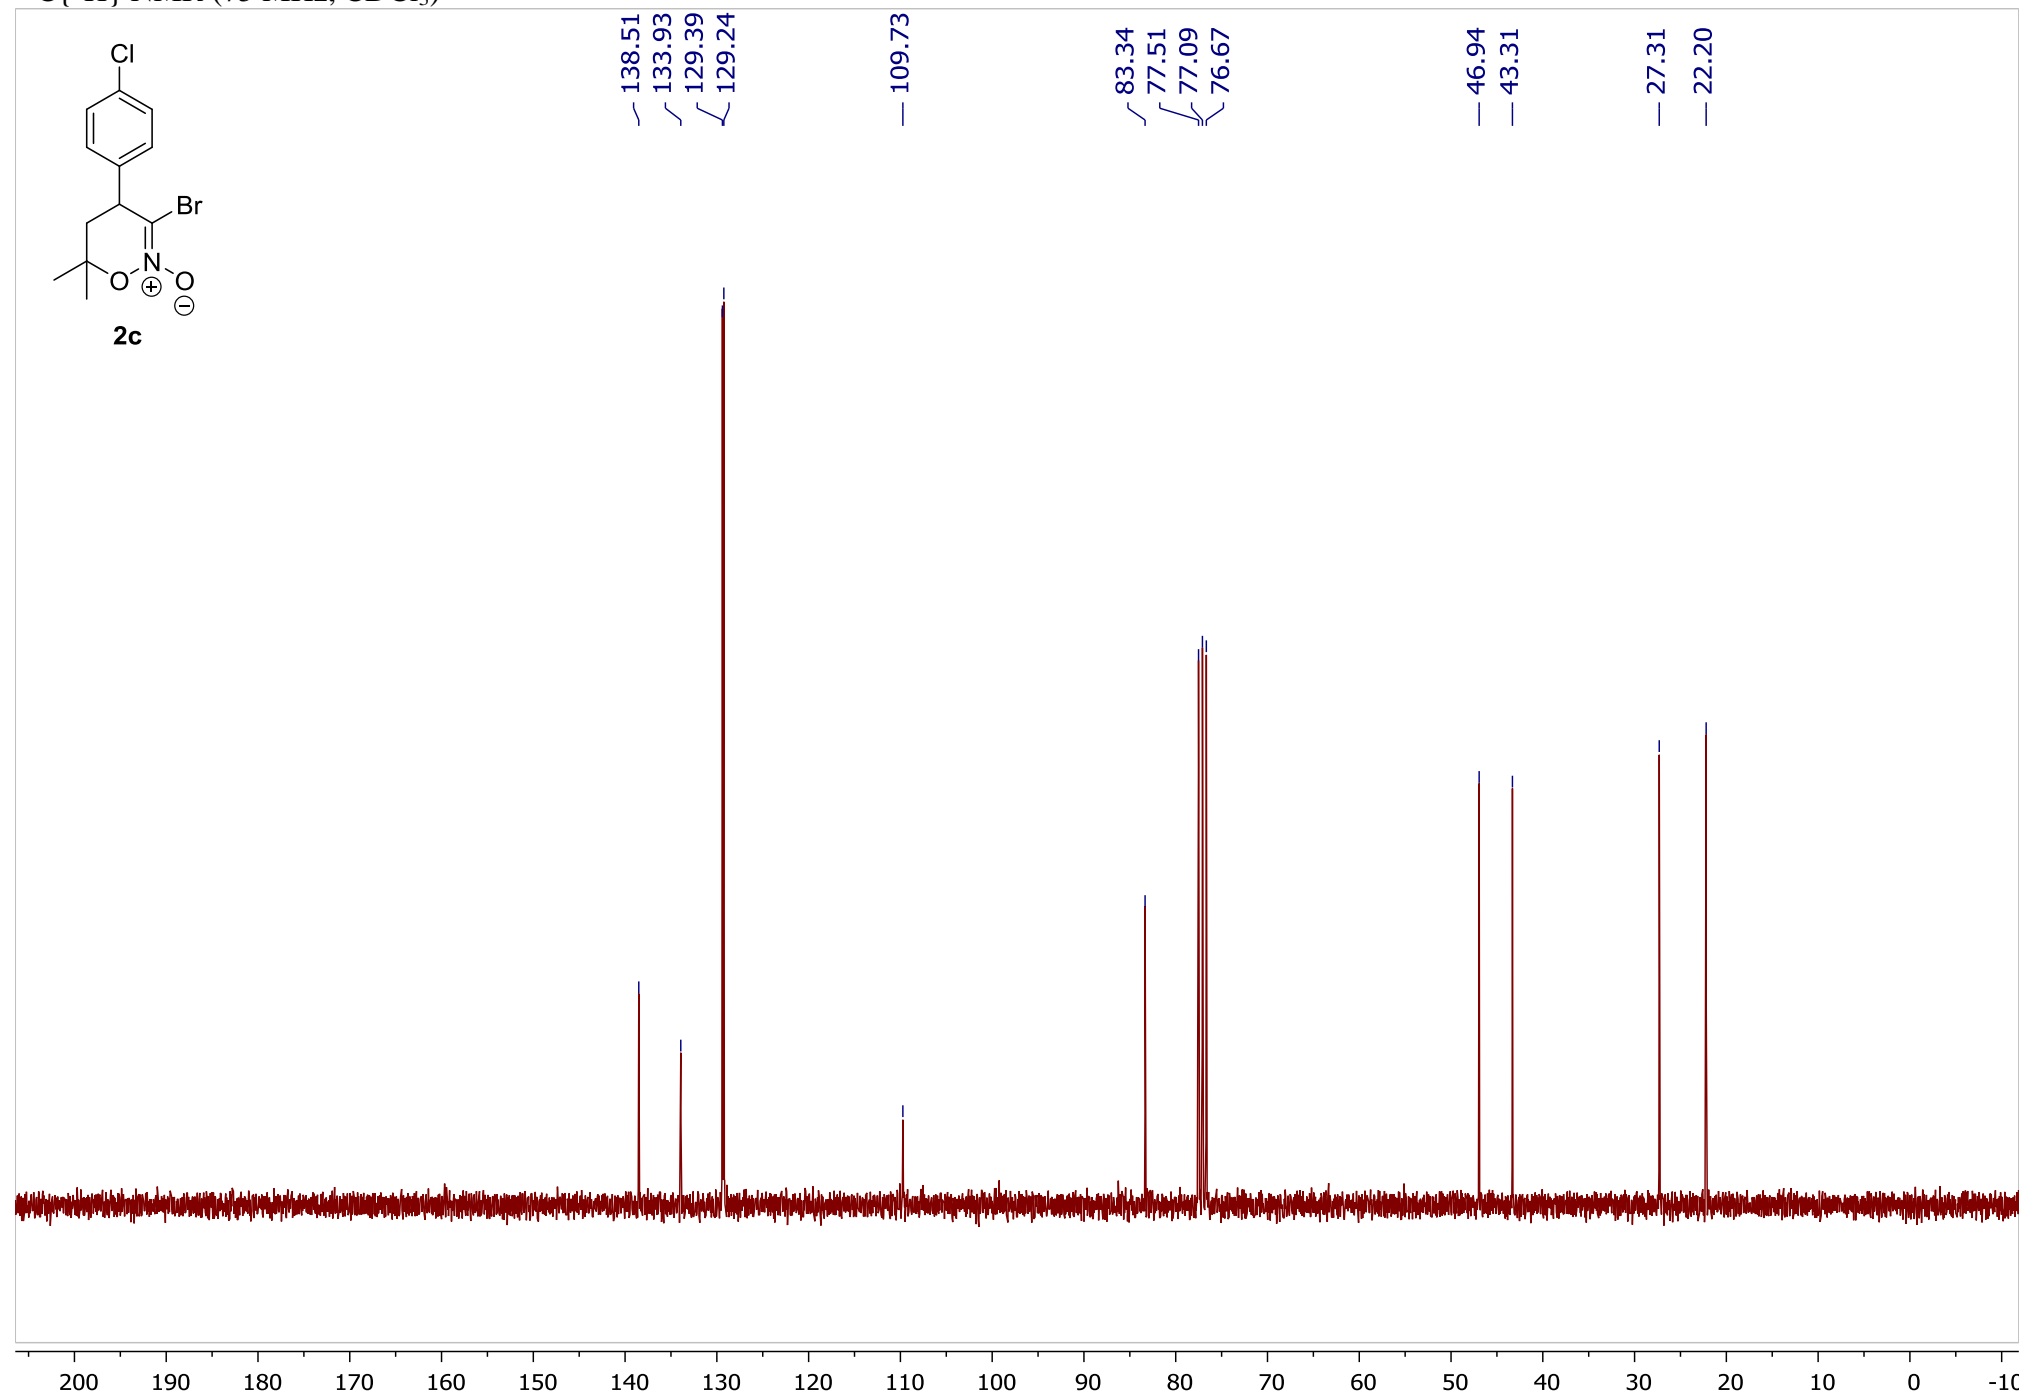

$^{13}\text{C}$  DEPT 135 (75 MHz,  $\text{CDCl}_3$ )

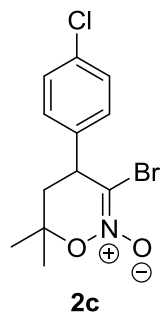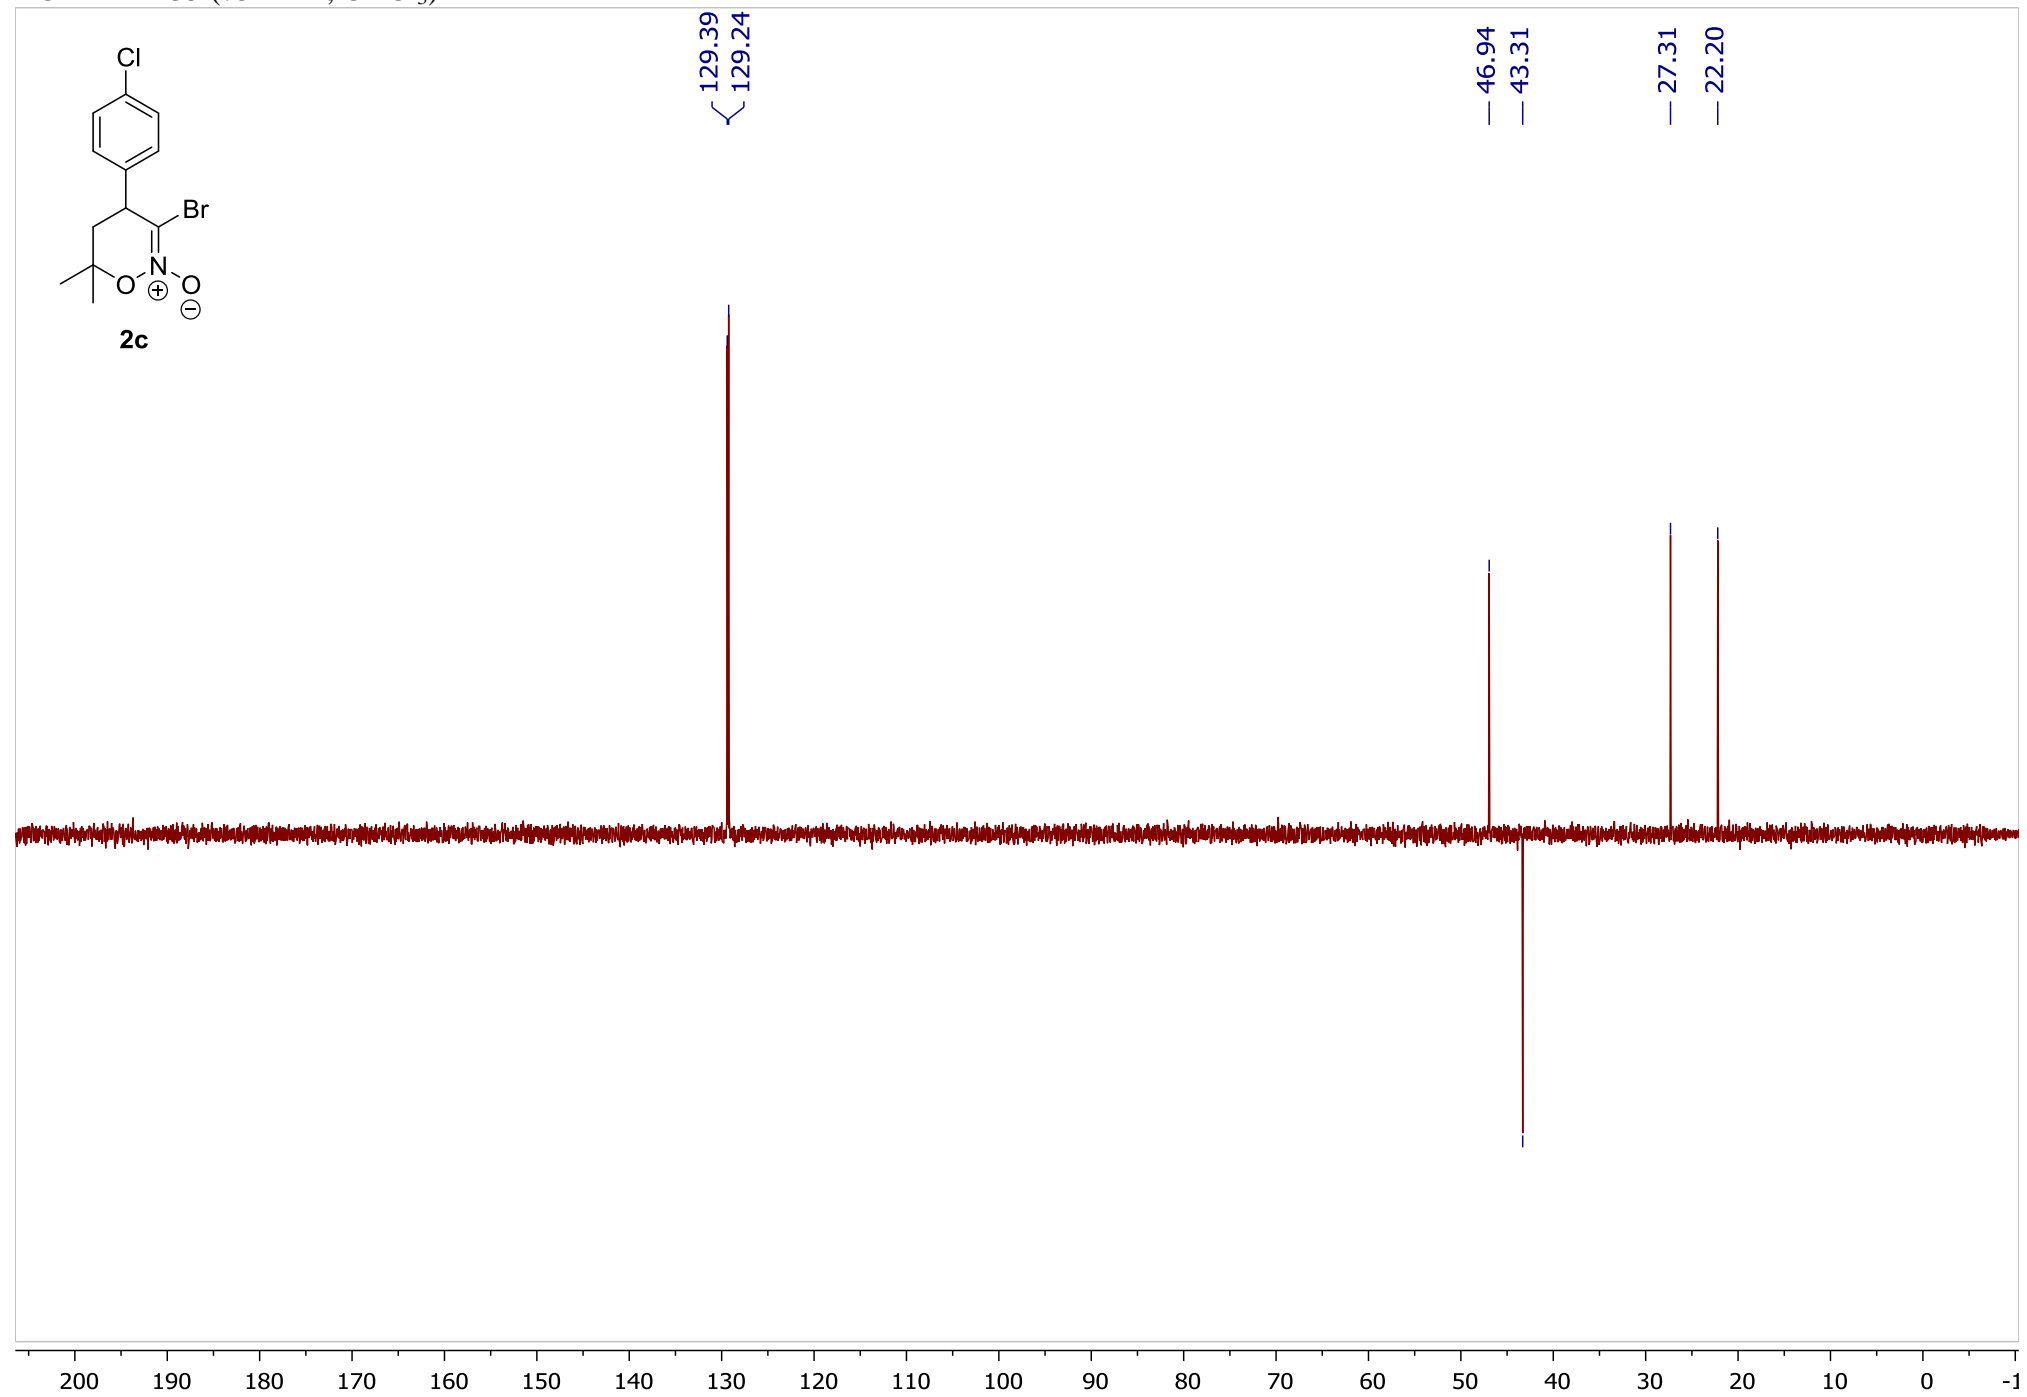

**3-Bromo-4-(4-fluorophenyl)-6,6-dimethyl-5,6-dihydro-4H-1,2-oxazine 2-oxide 2d**

<sup>1</sup>H NMR (300 MHz, CDCl<sub>3</sub>)

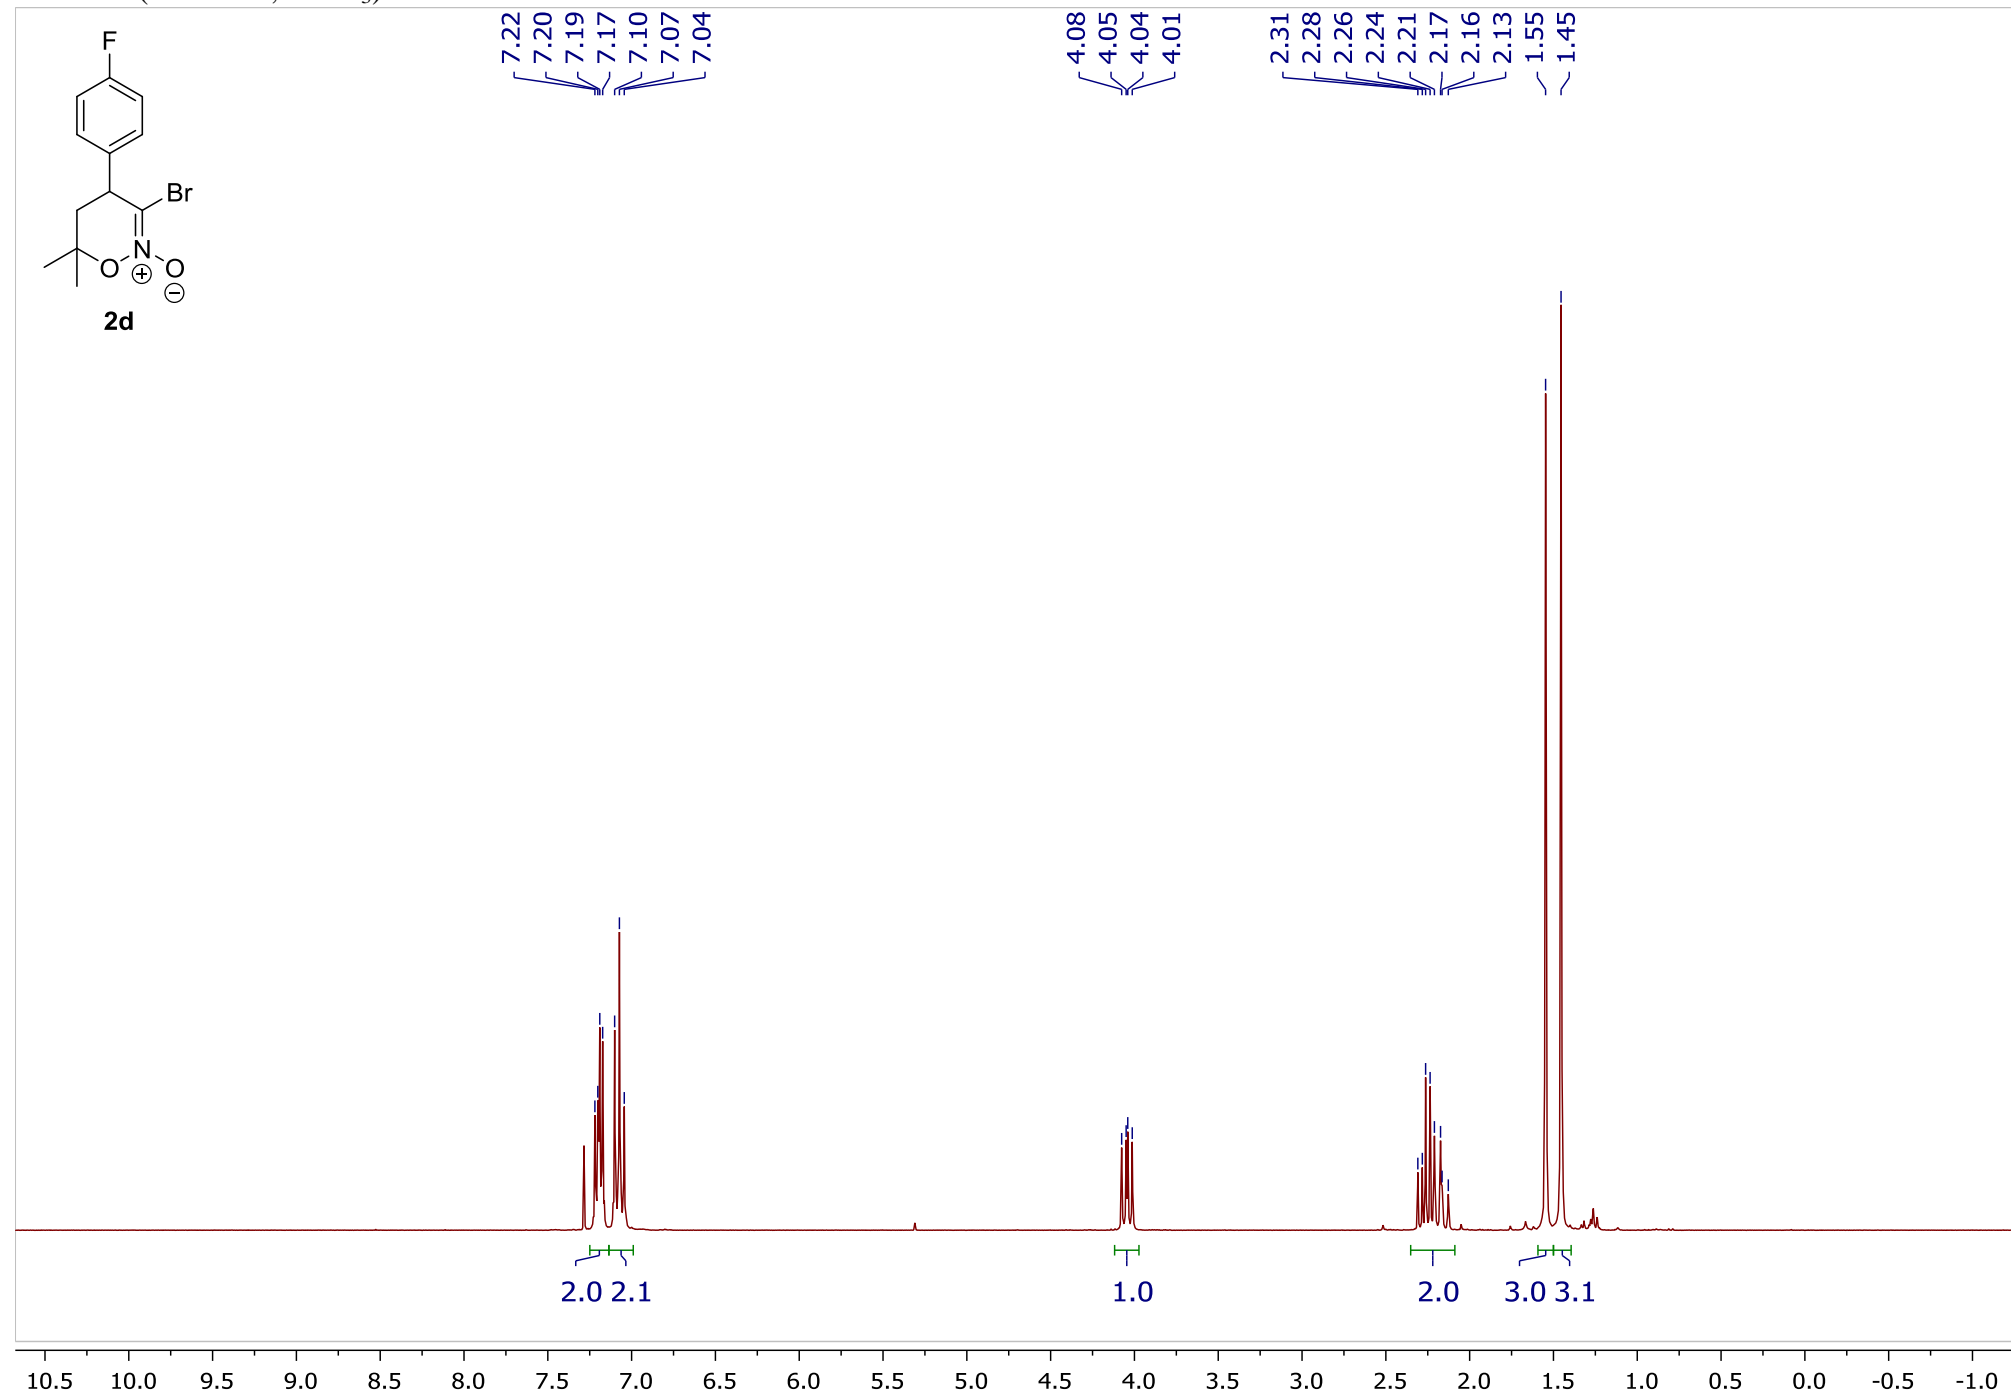

$^{13}\text{C}\{^1\text{H}\}$  NMR (75 MHz,  $\text{CDCl}_3$ )

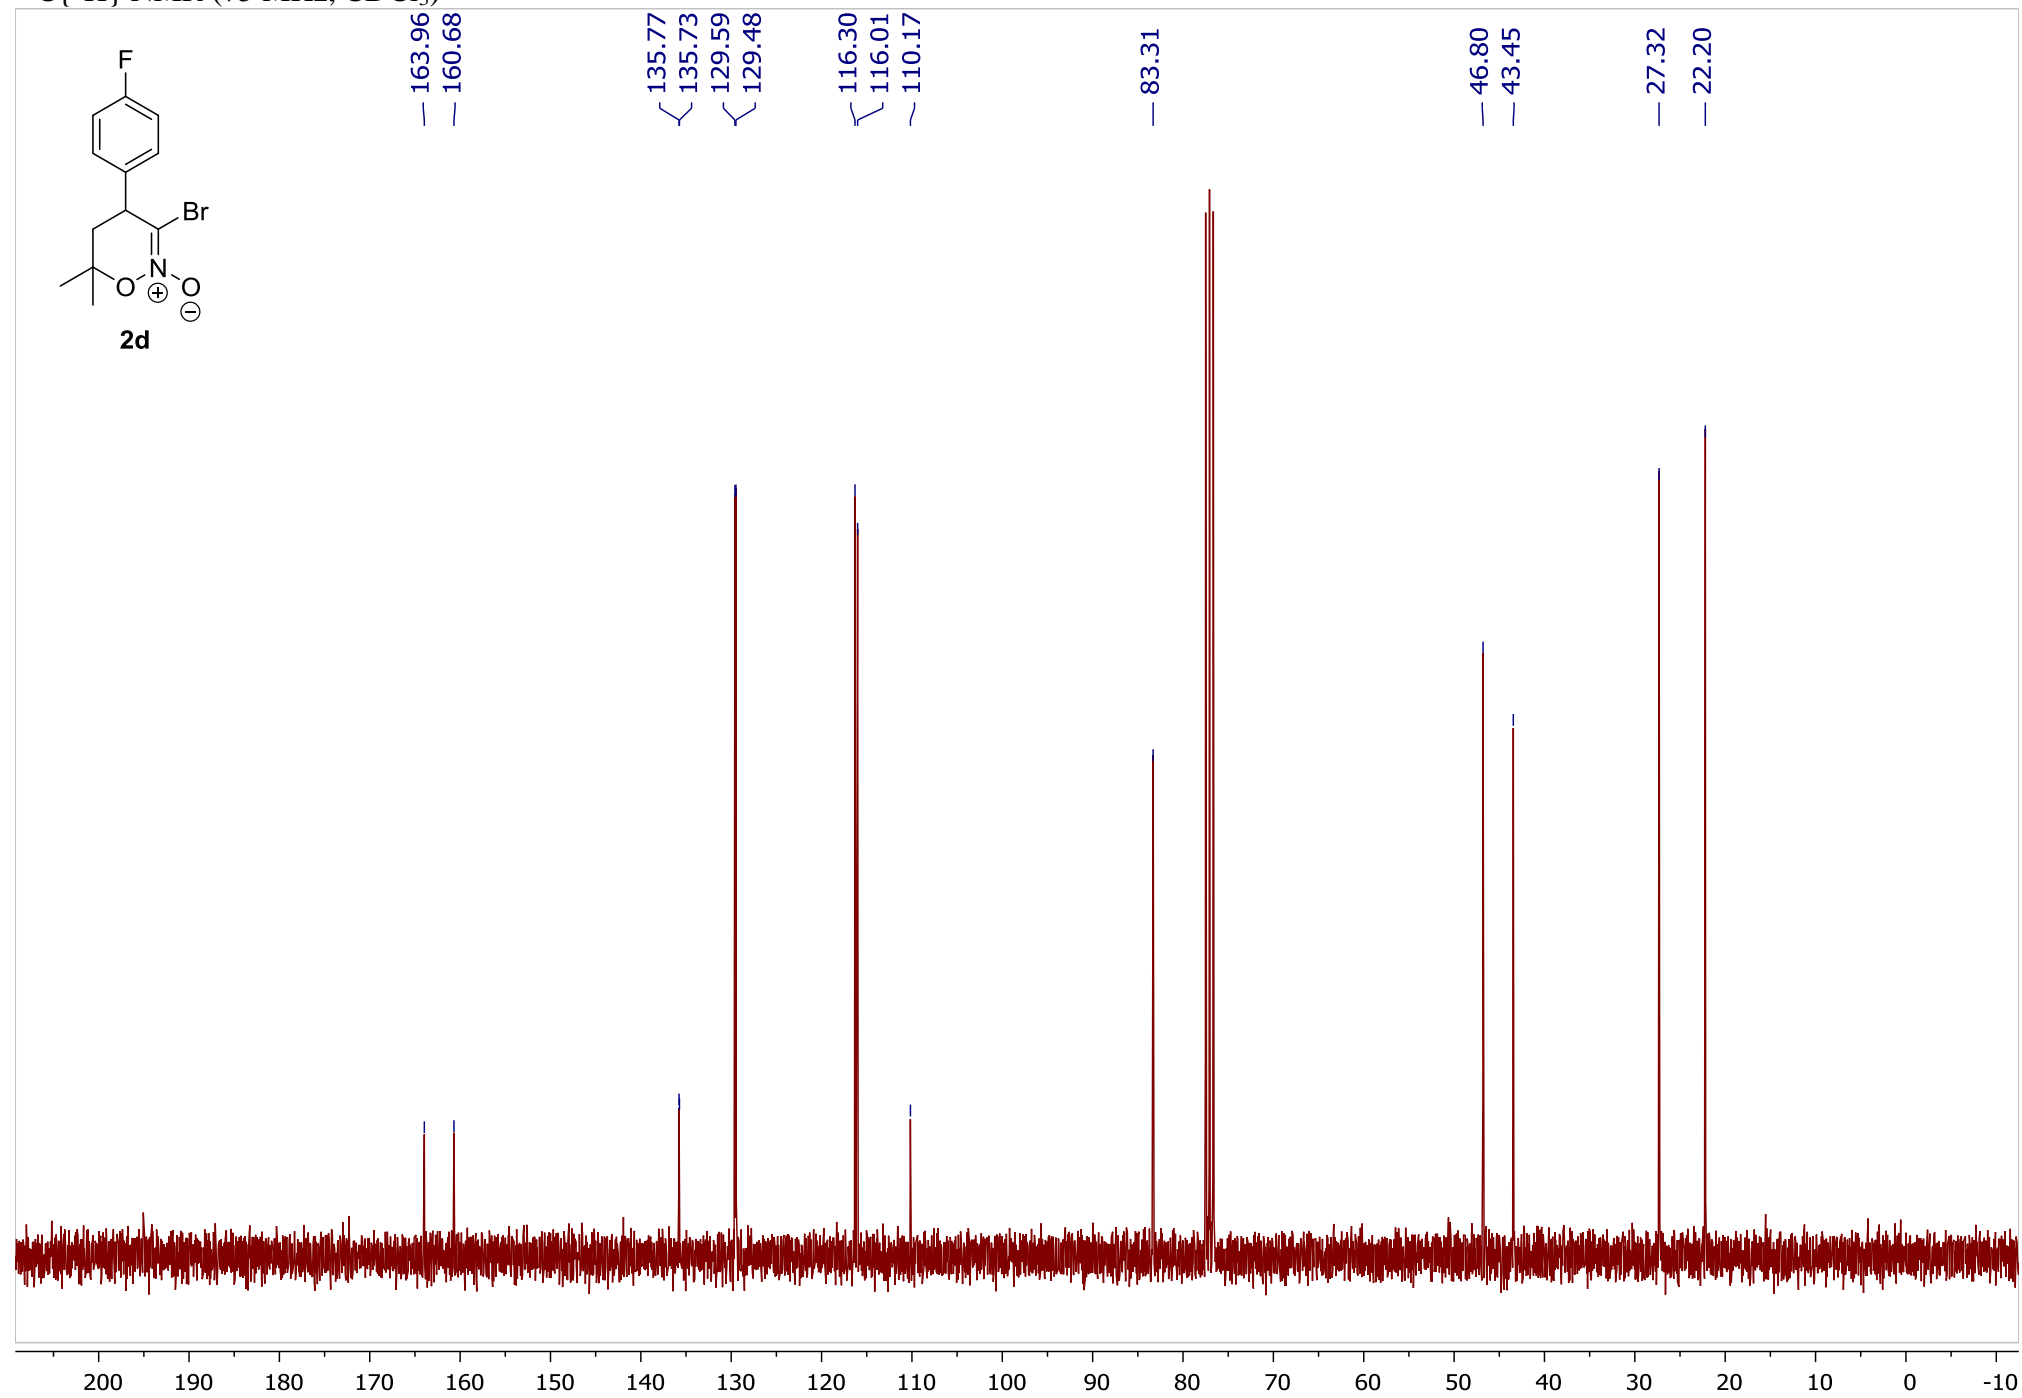



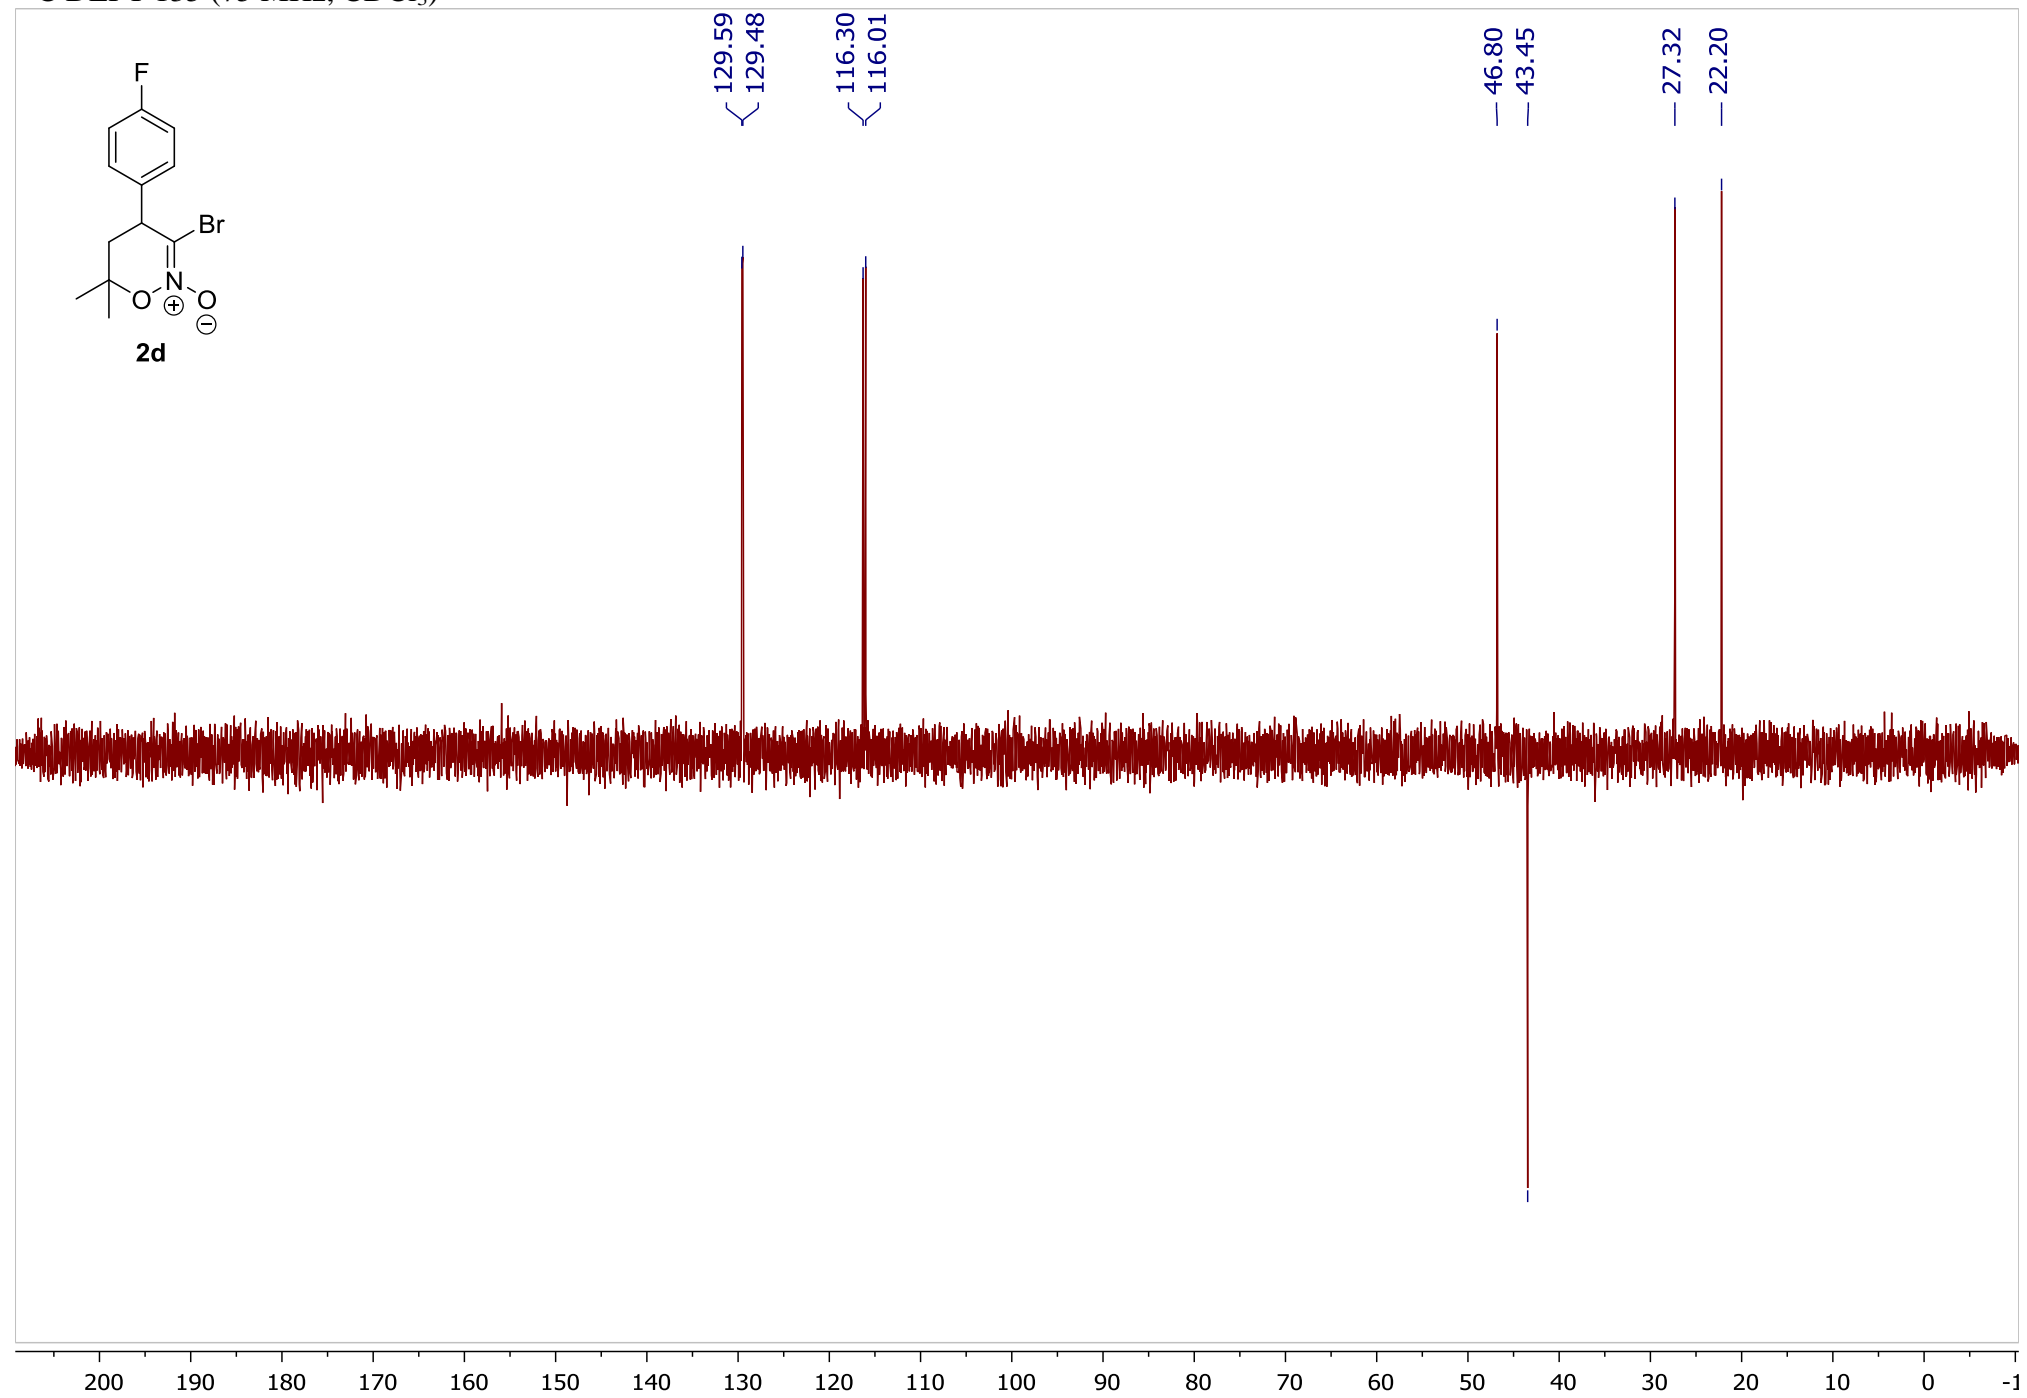

$^{19}\text{F}$  NMR (282 MHz,  $\text{CDCl}_3$ )

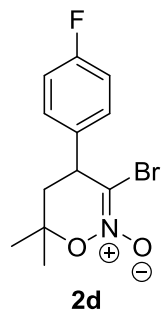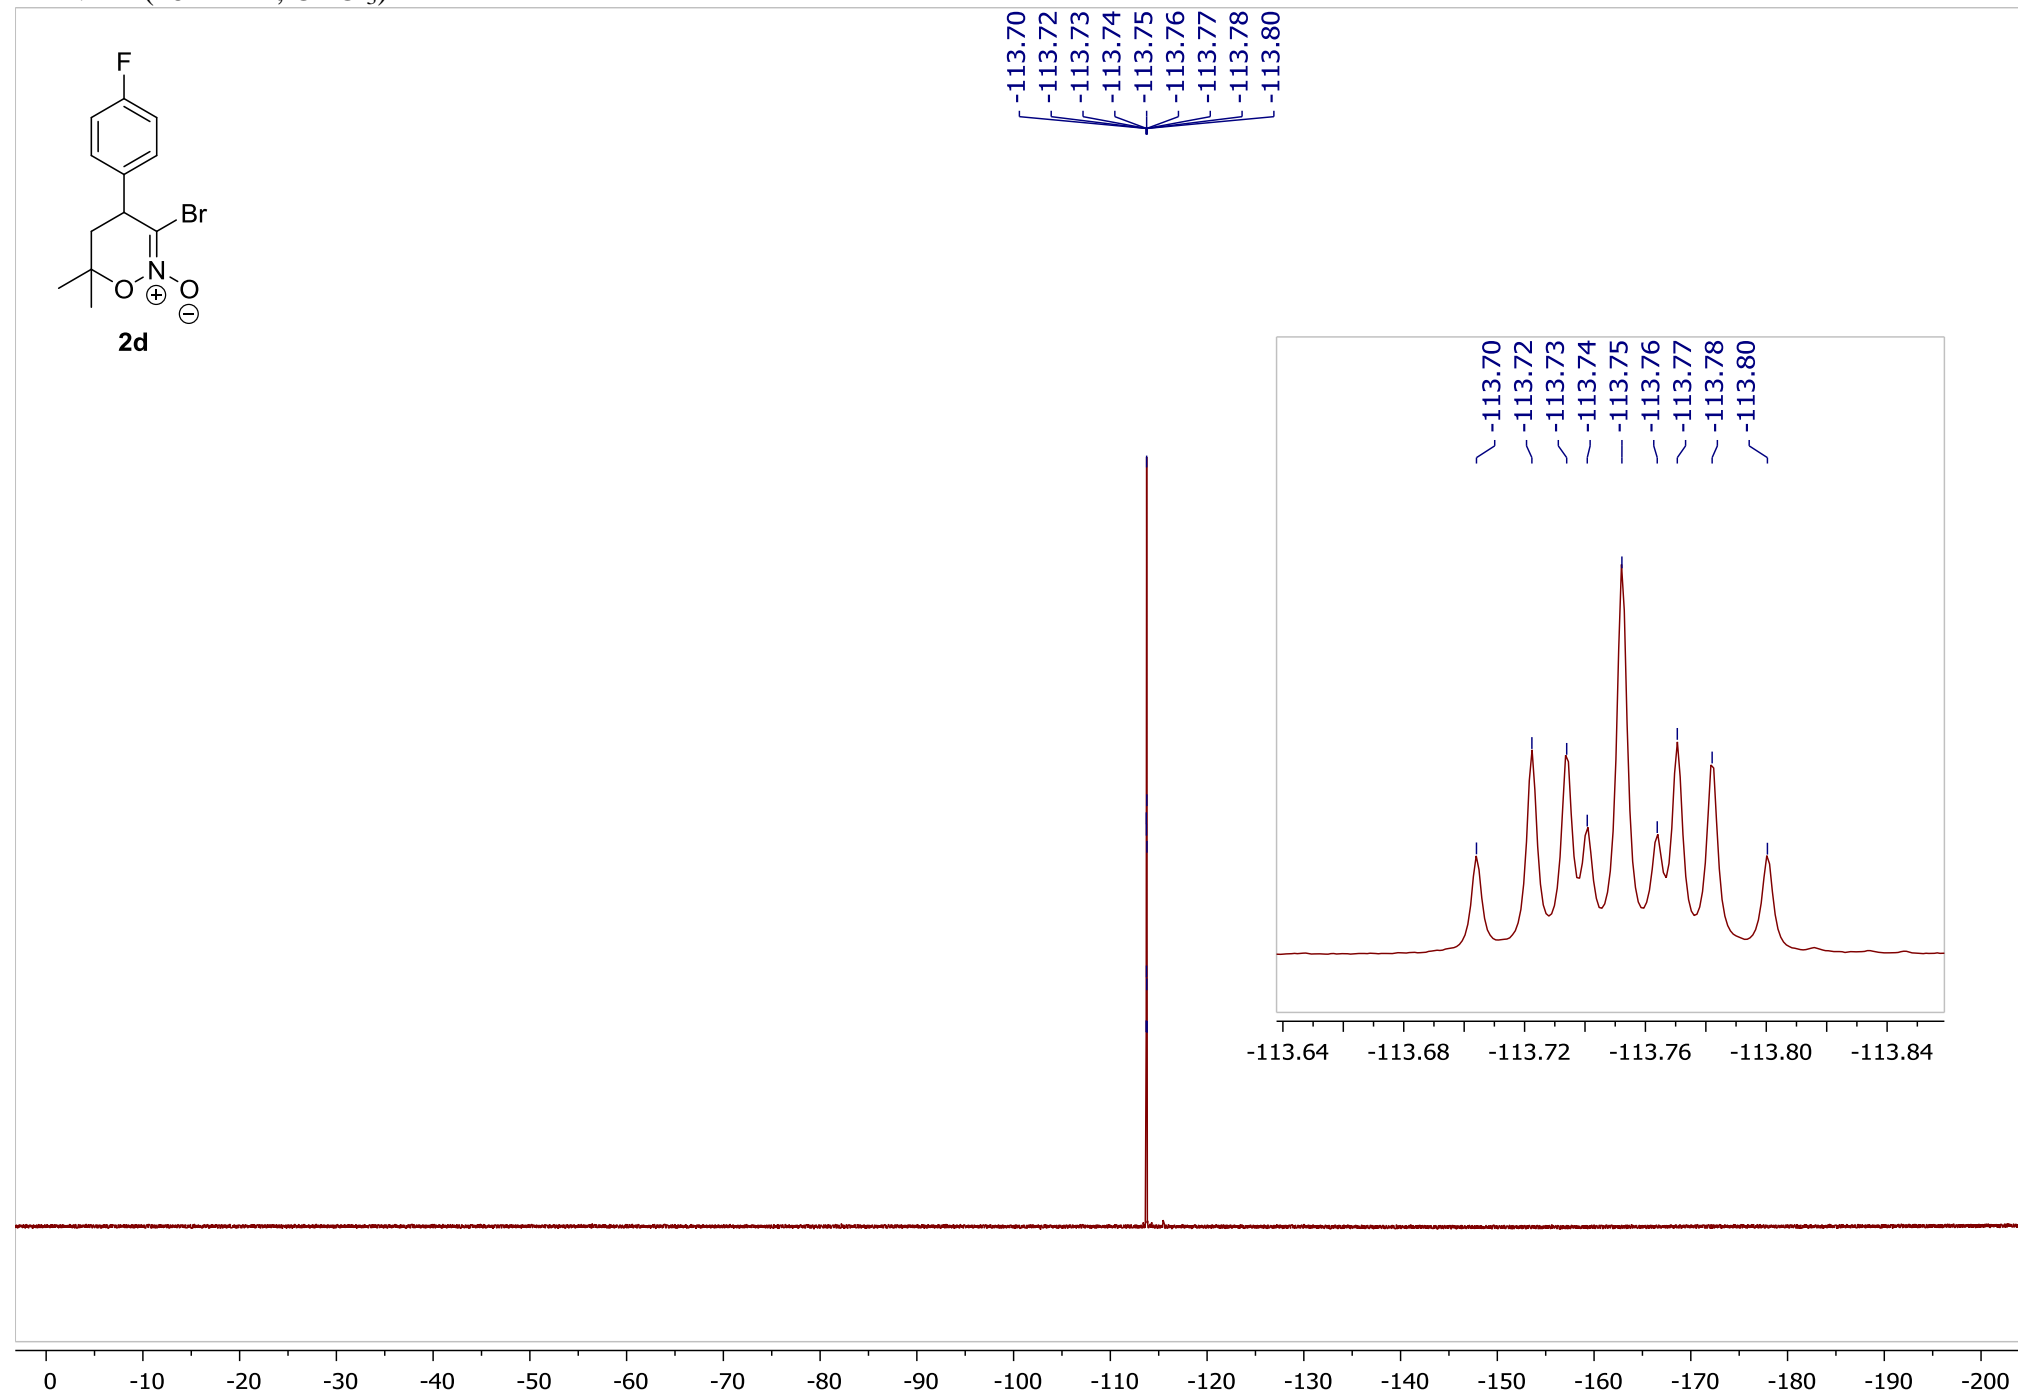

**3-Bromo-6,6-dimethyl-4-*p*-tolyl-5,6-dihydro-4H-1,2-oxazine 2-oxide 2e**

<sup>1</sup>H NMR (300 MHz, CDCl<sub>3</sub>)

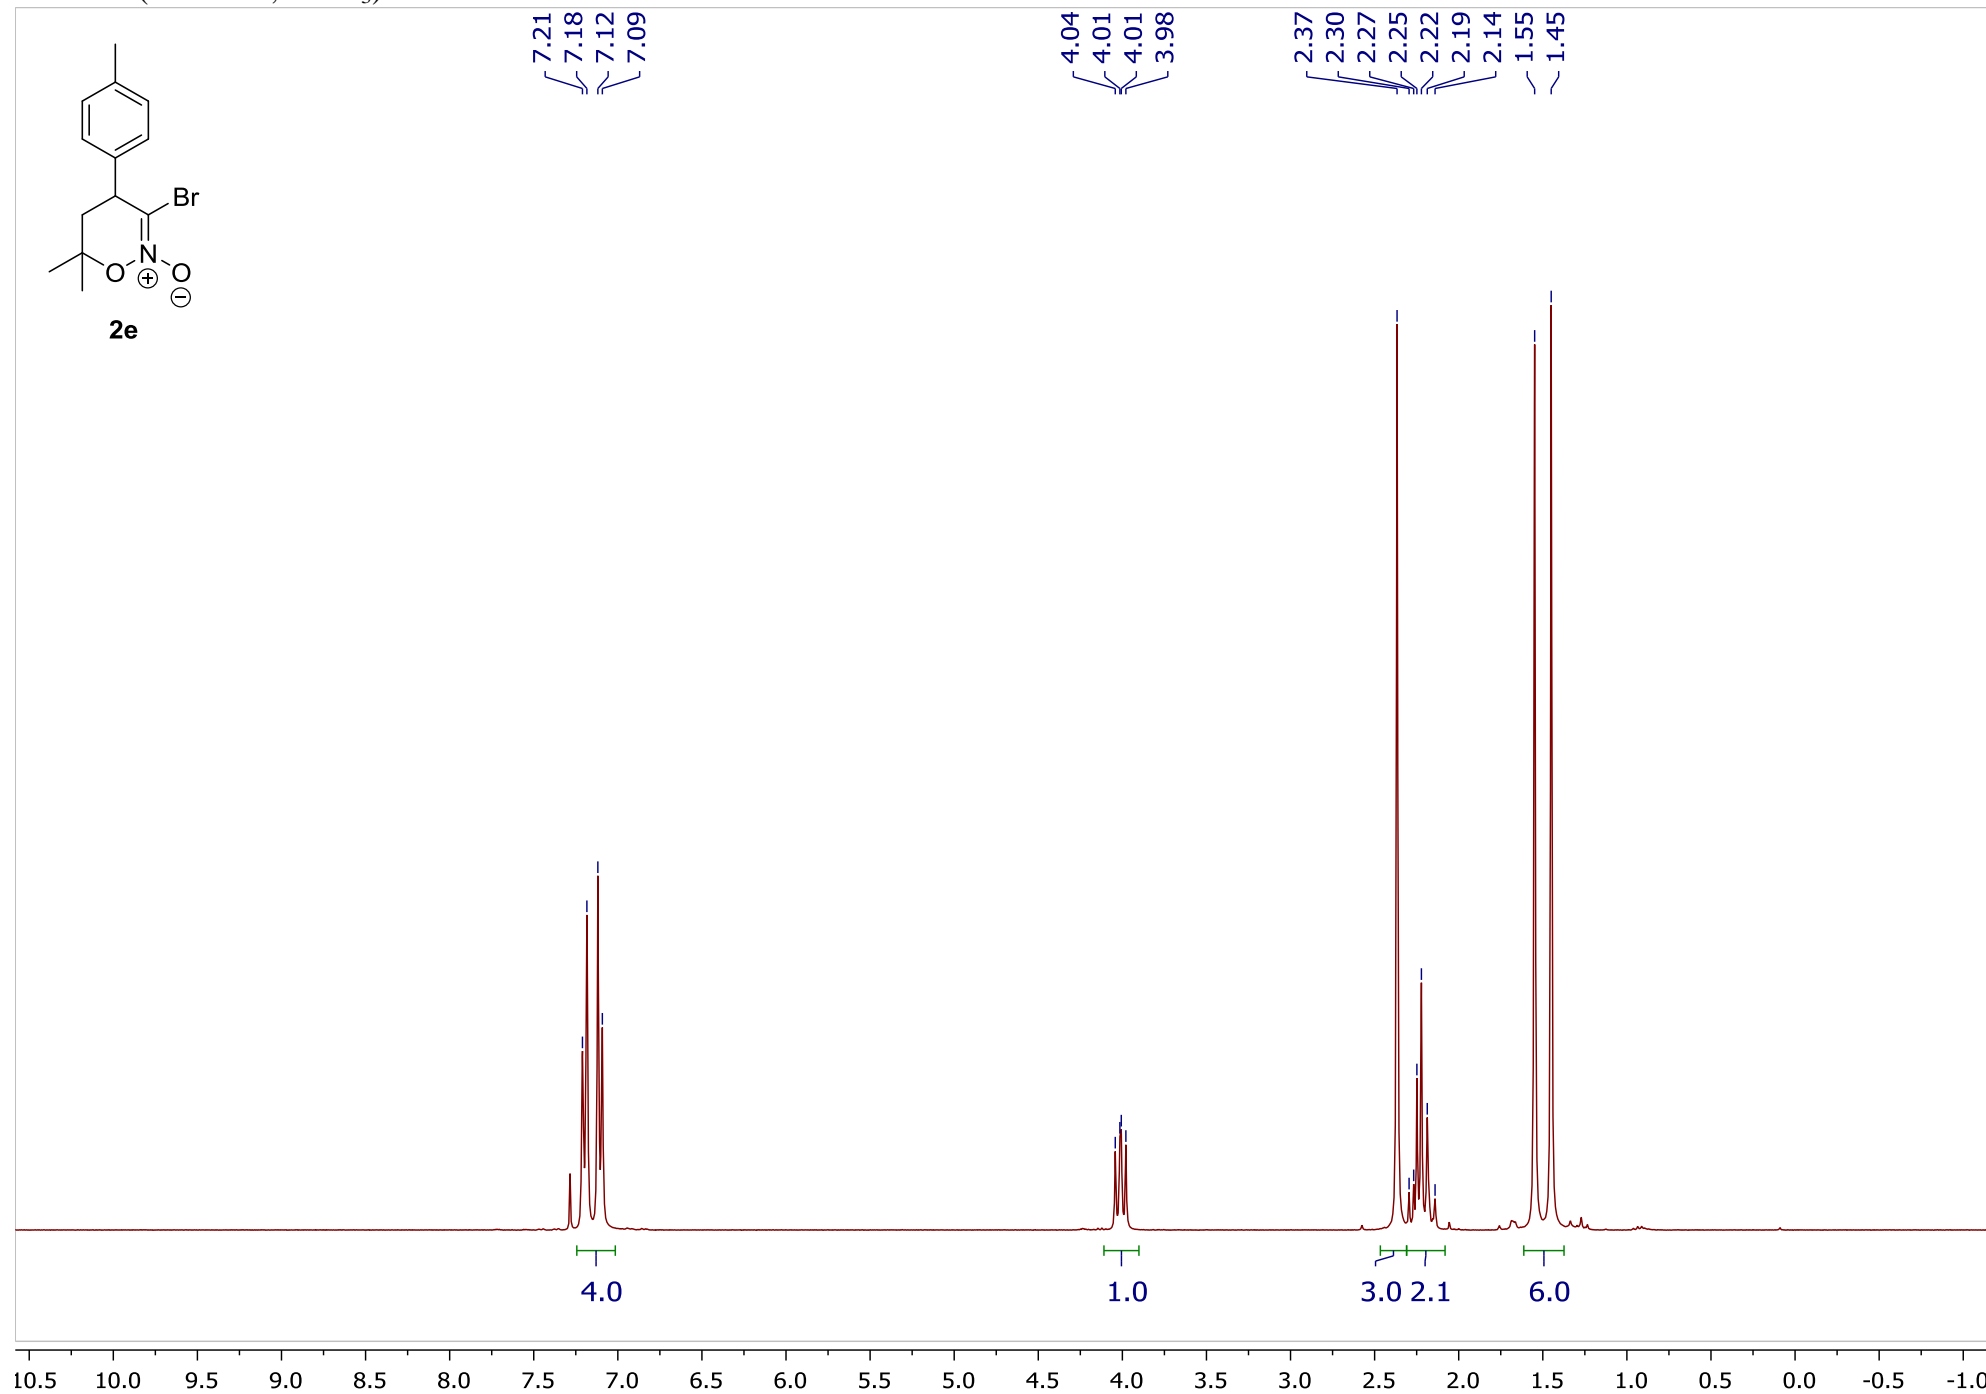

$^{13}\text{C}\{^1\text{H}\}$  NMR (75 MHz,  $\text{CDCl}_3$ )

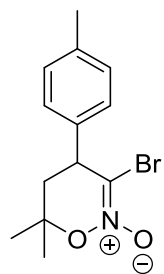

**2e**

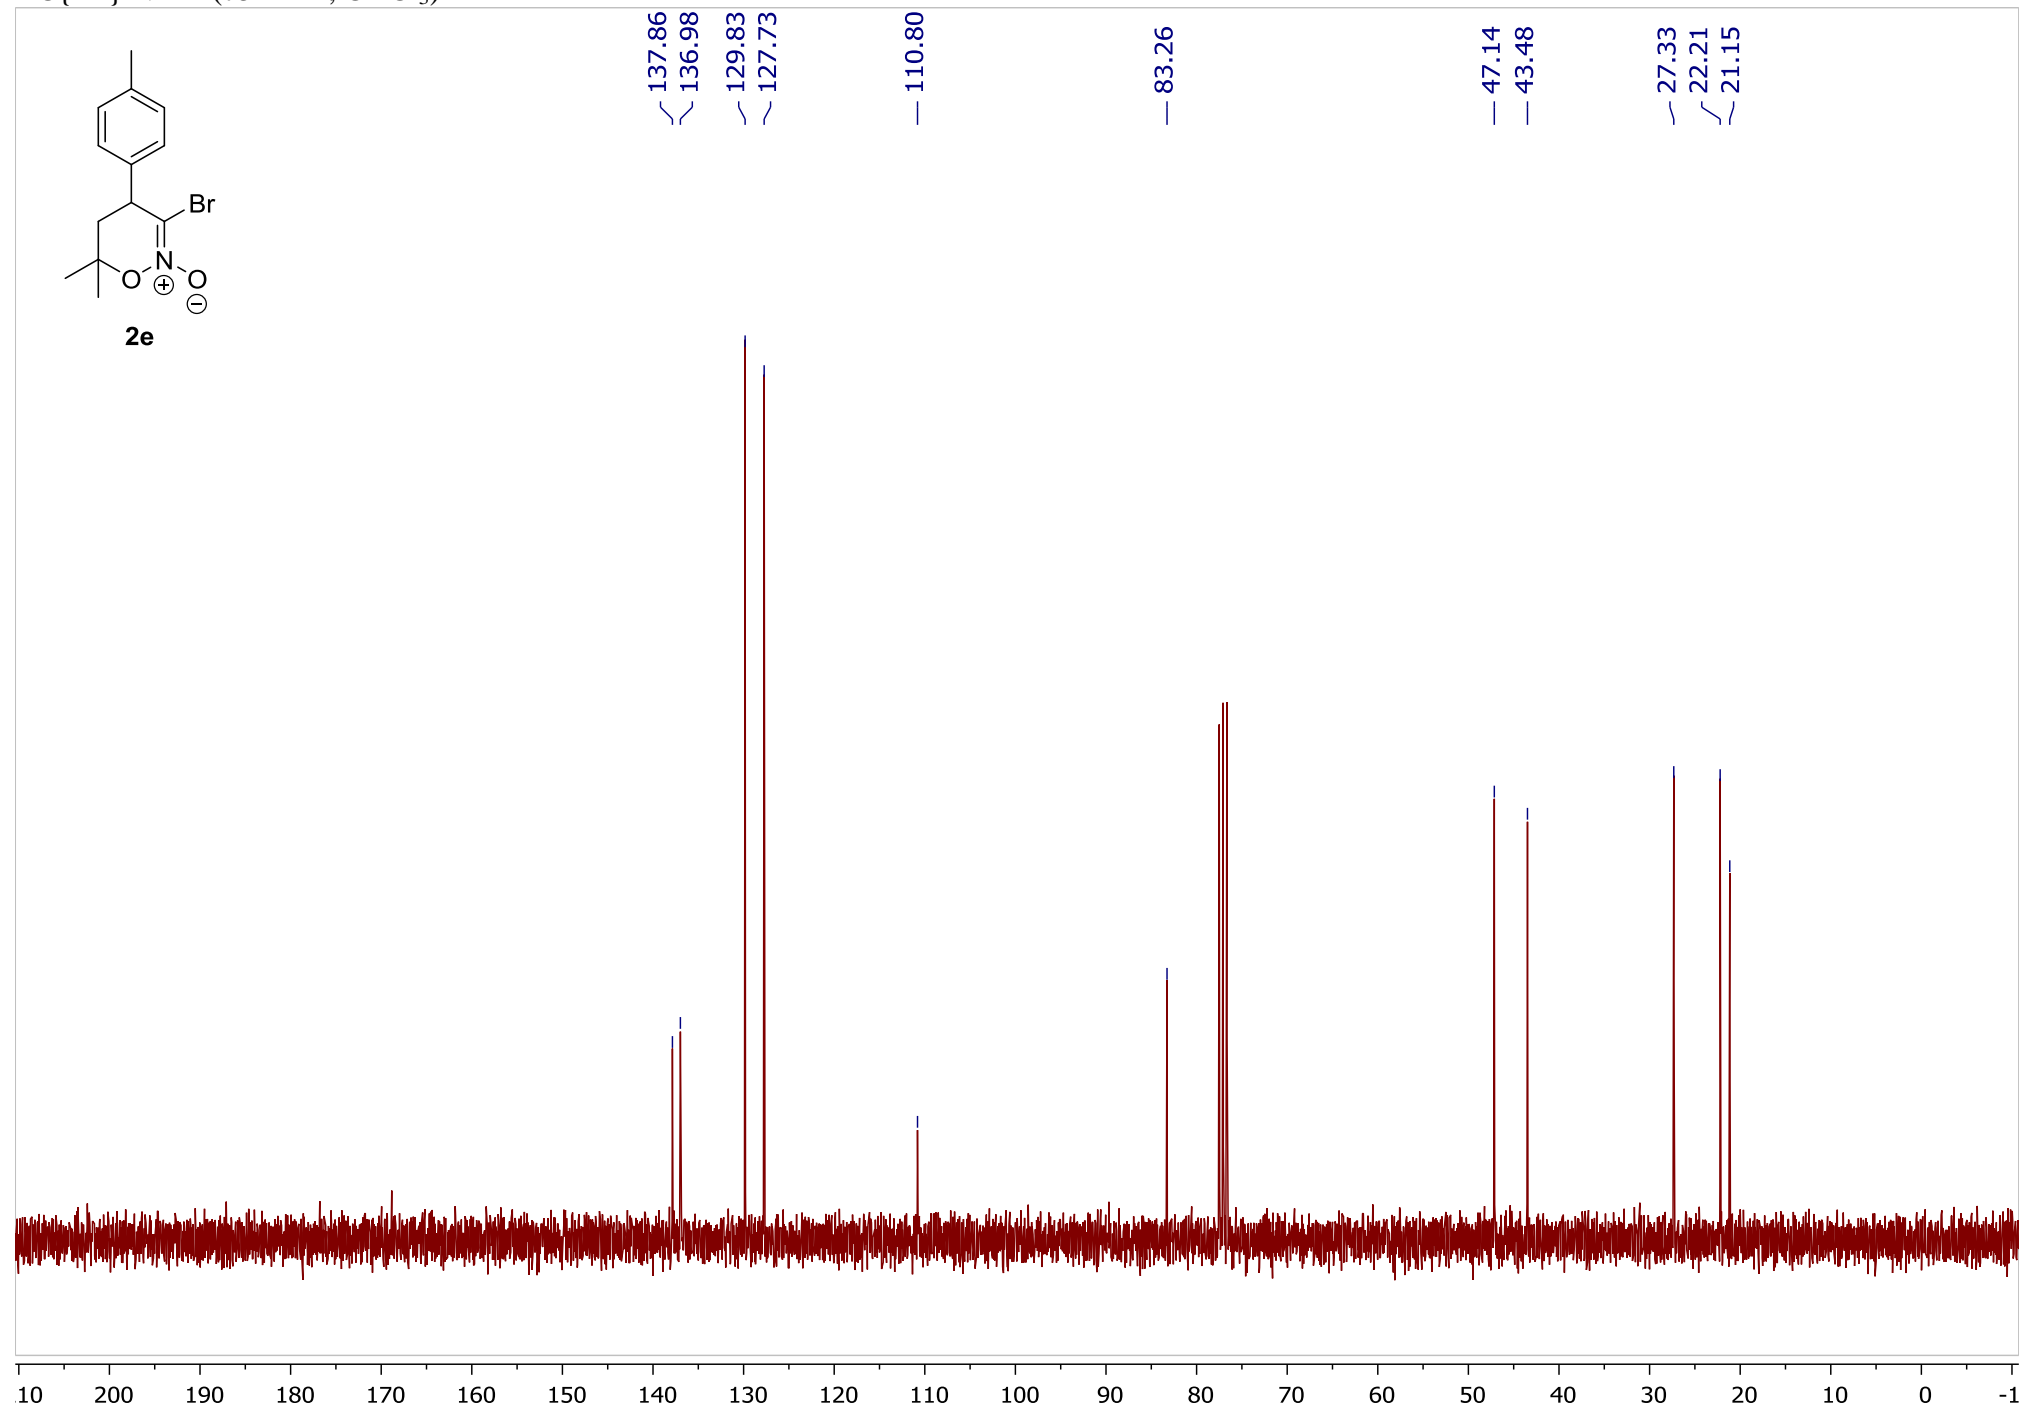

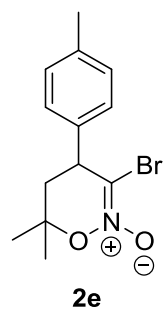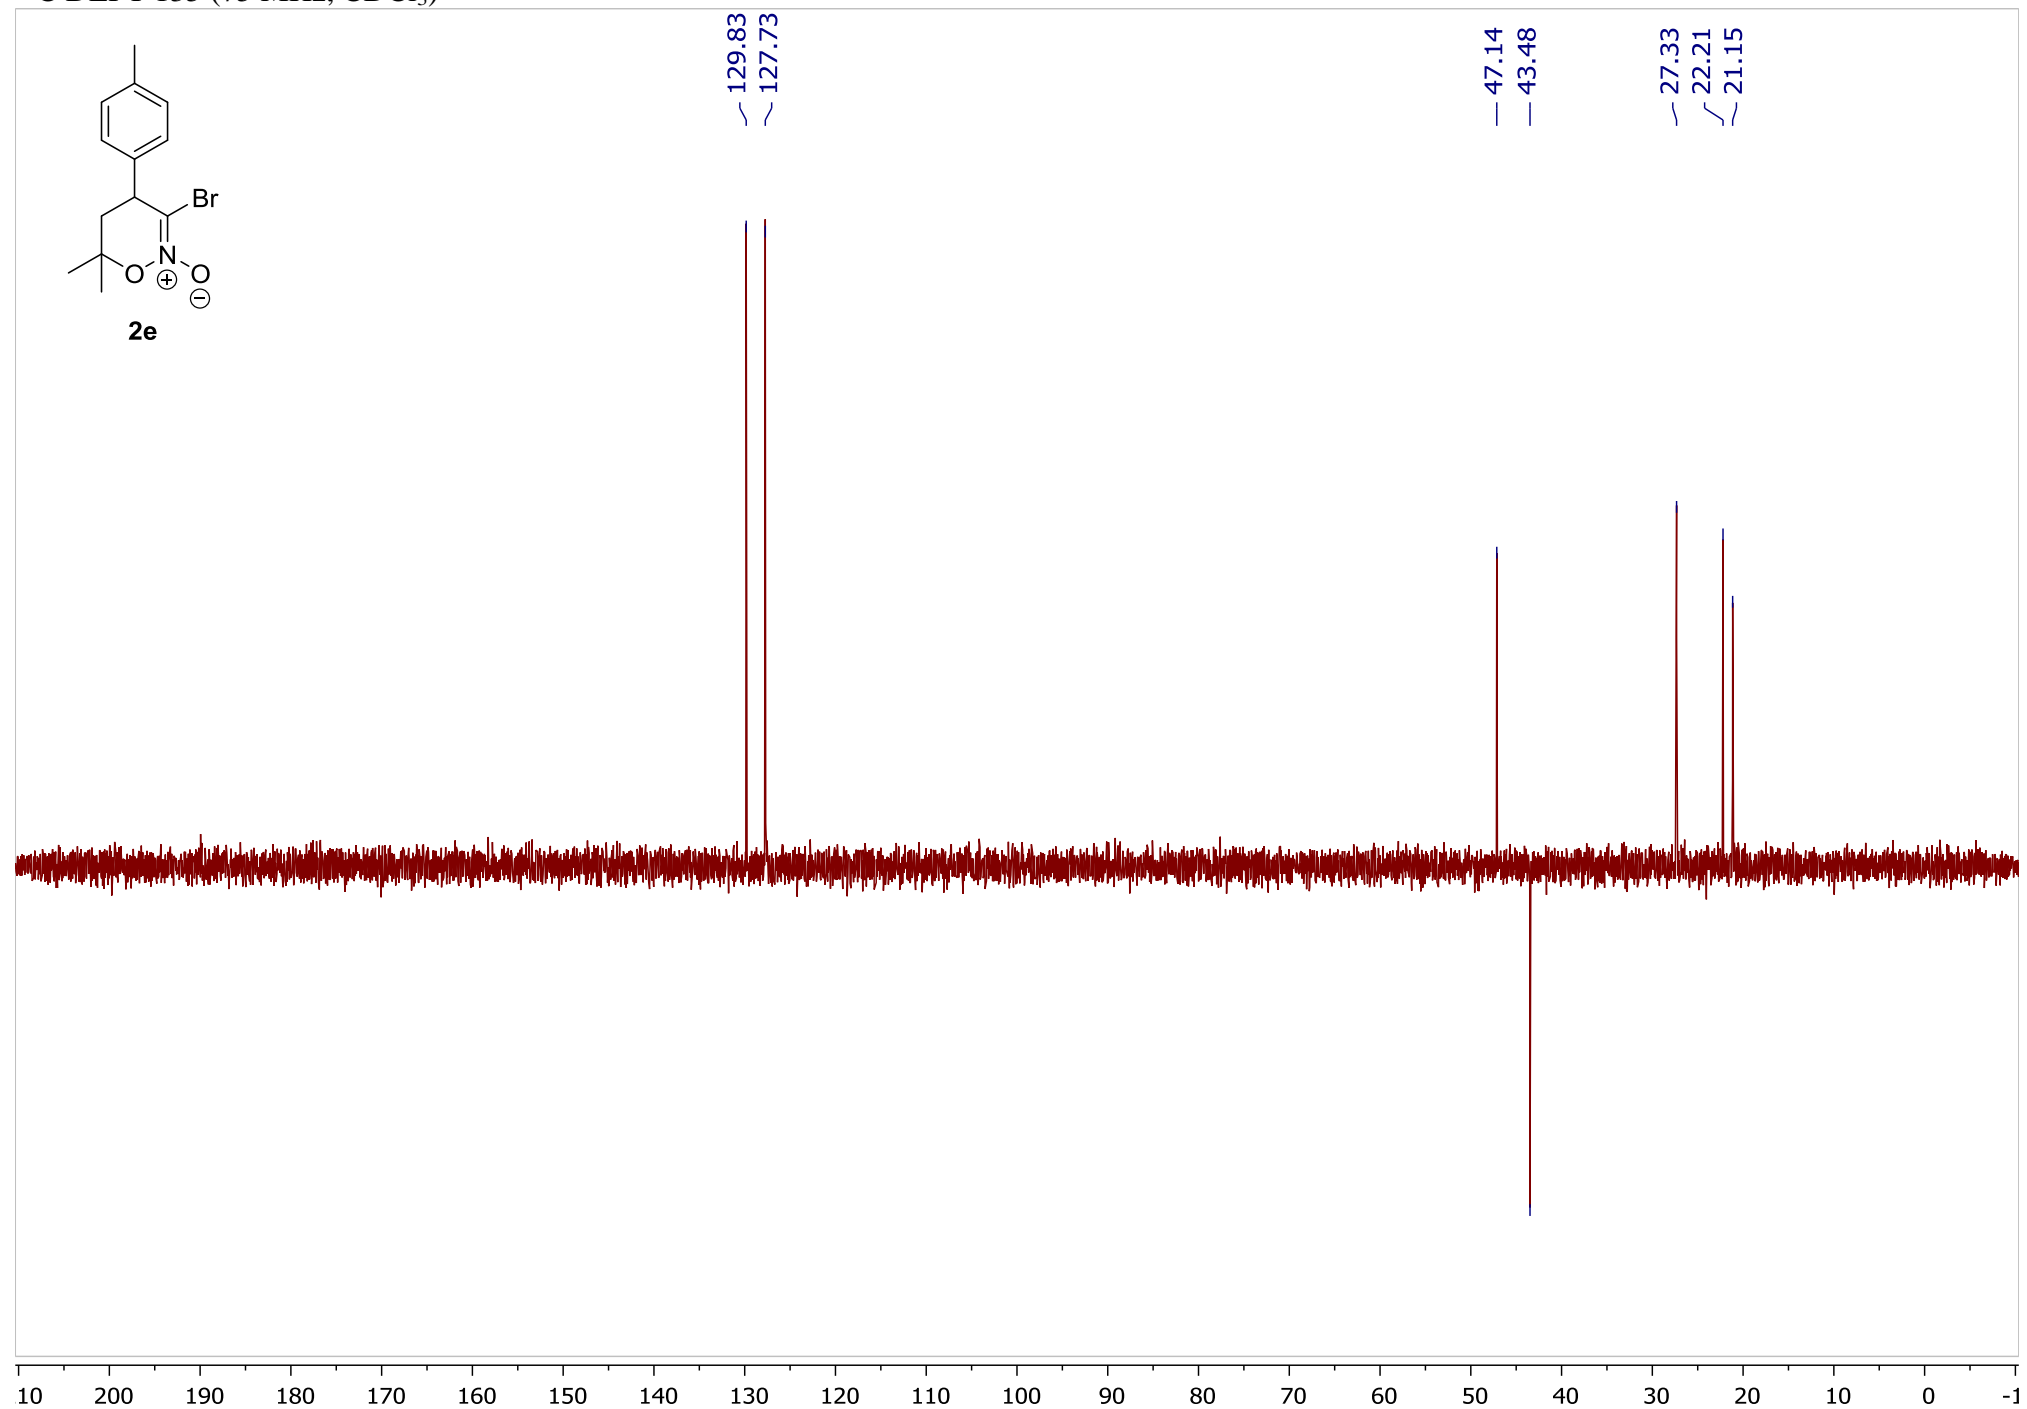

**3-Bromo-4-(4-((1-ethoxy-2-methyl-1-oxopropan-2-yl)oxy)phenyl)-6,6-dimethyl-5,6-dihydro-4H-1,2-oxazine 2-oxide 2f**

<sup>1</sup>H NMR (300 MHz, CDCl<sub>3</sub>)

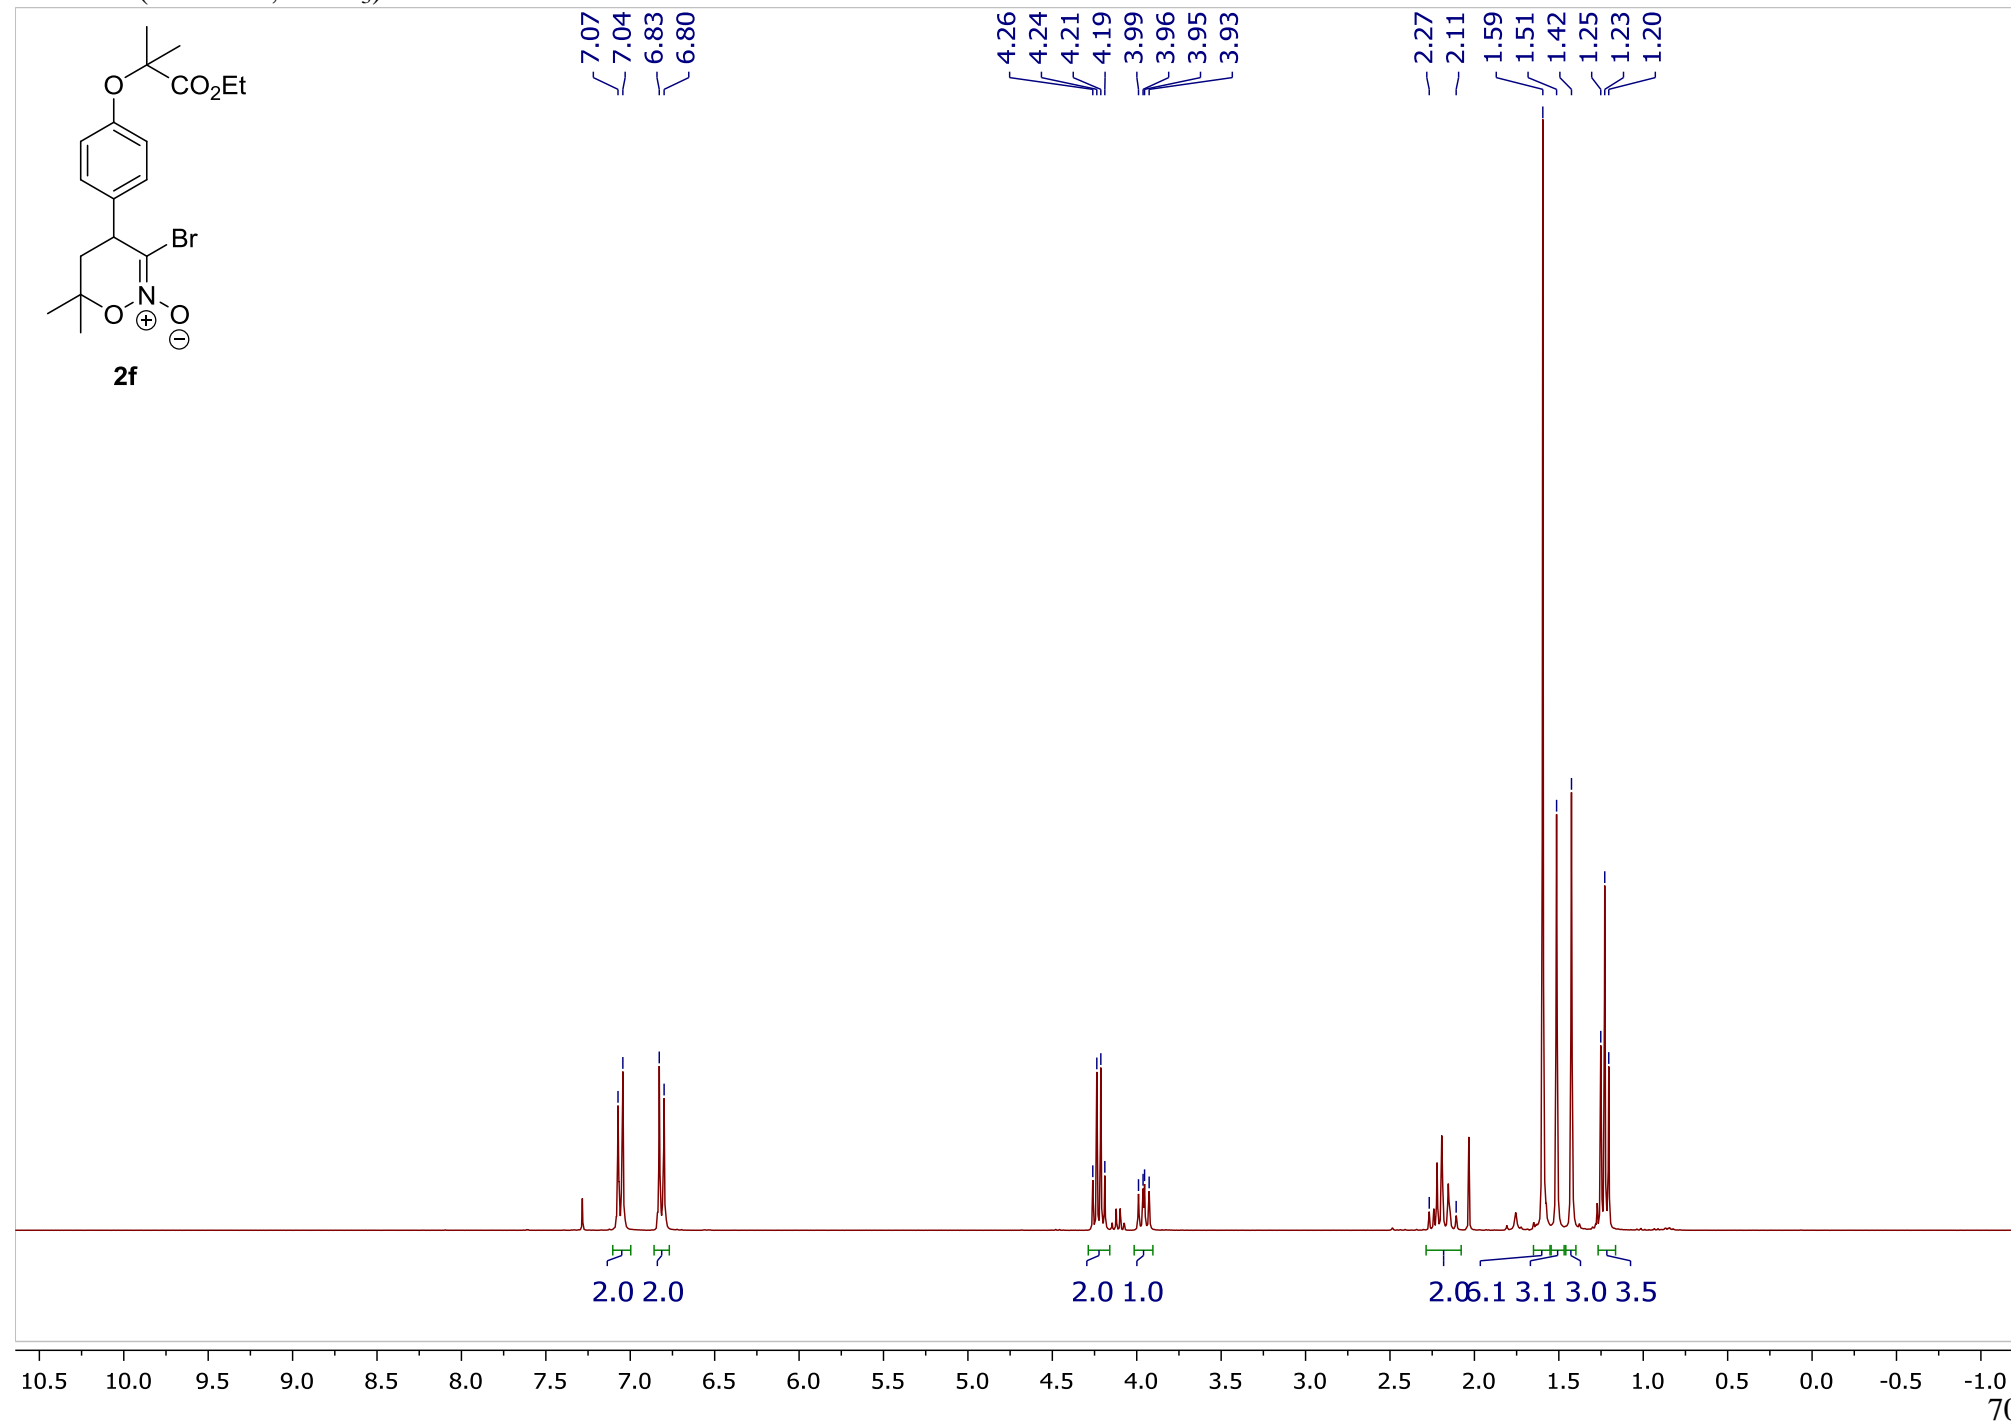

$^{13}\text{C}\{^1\text{H}\}$  NMR (75 MHz,  $\text{CDCl}_3$ )

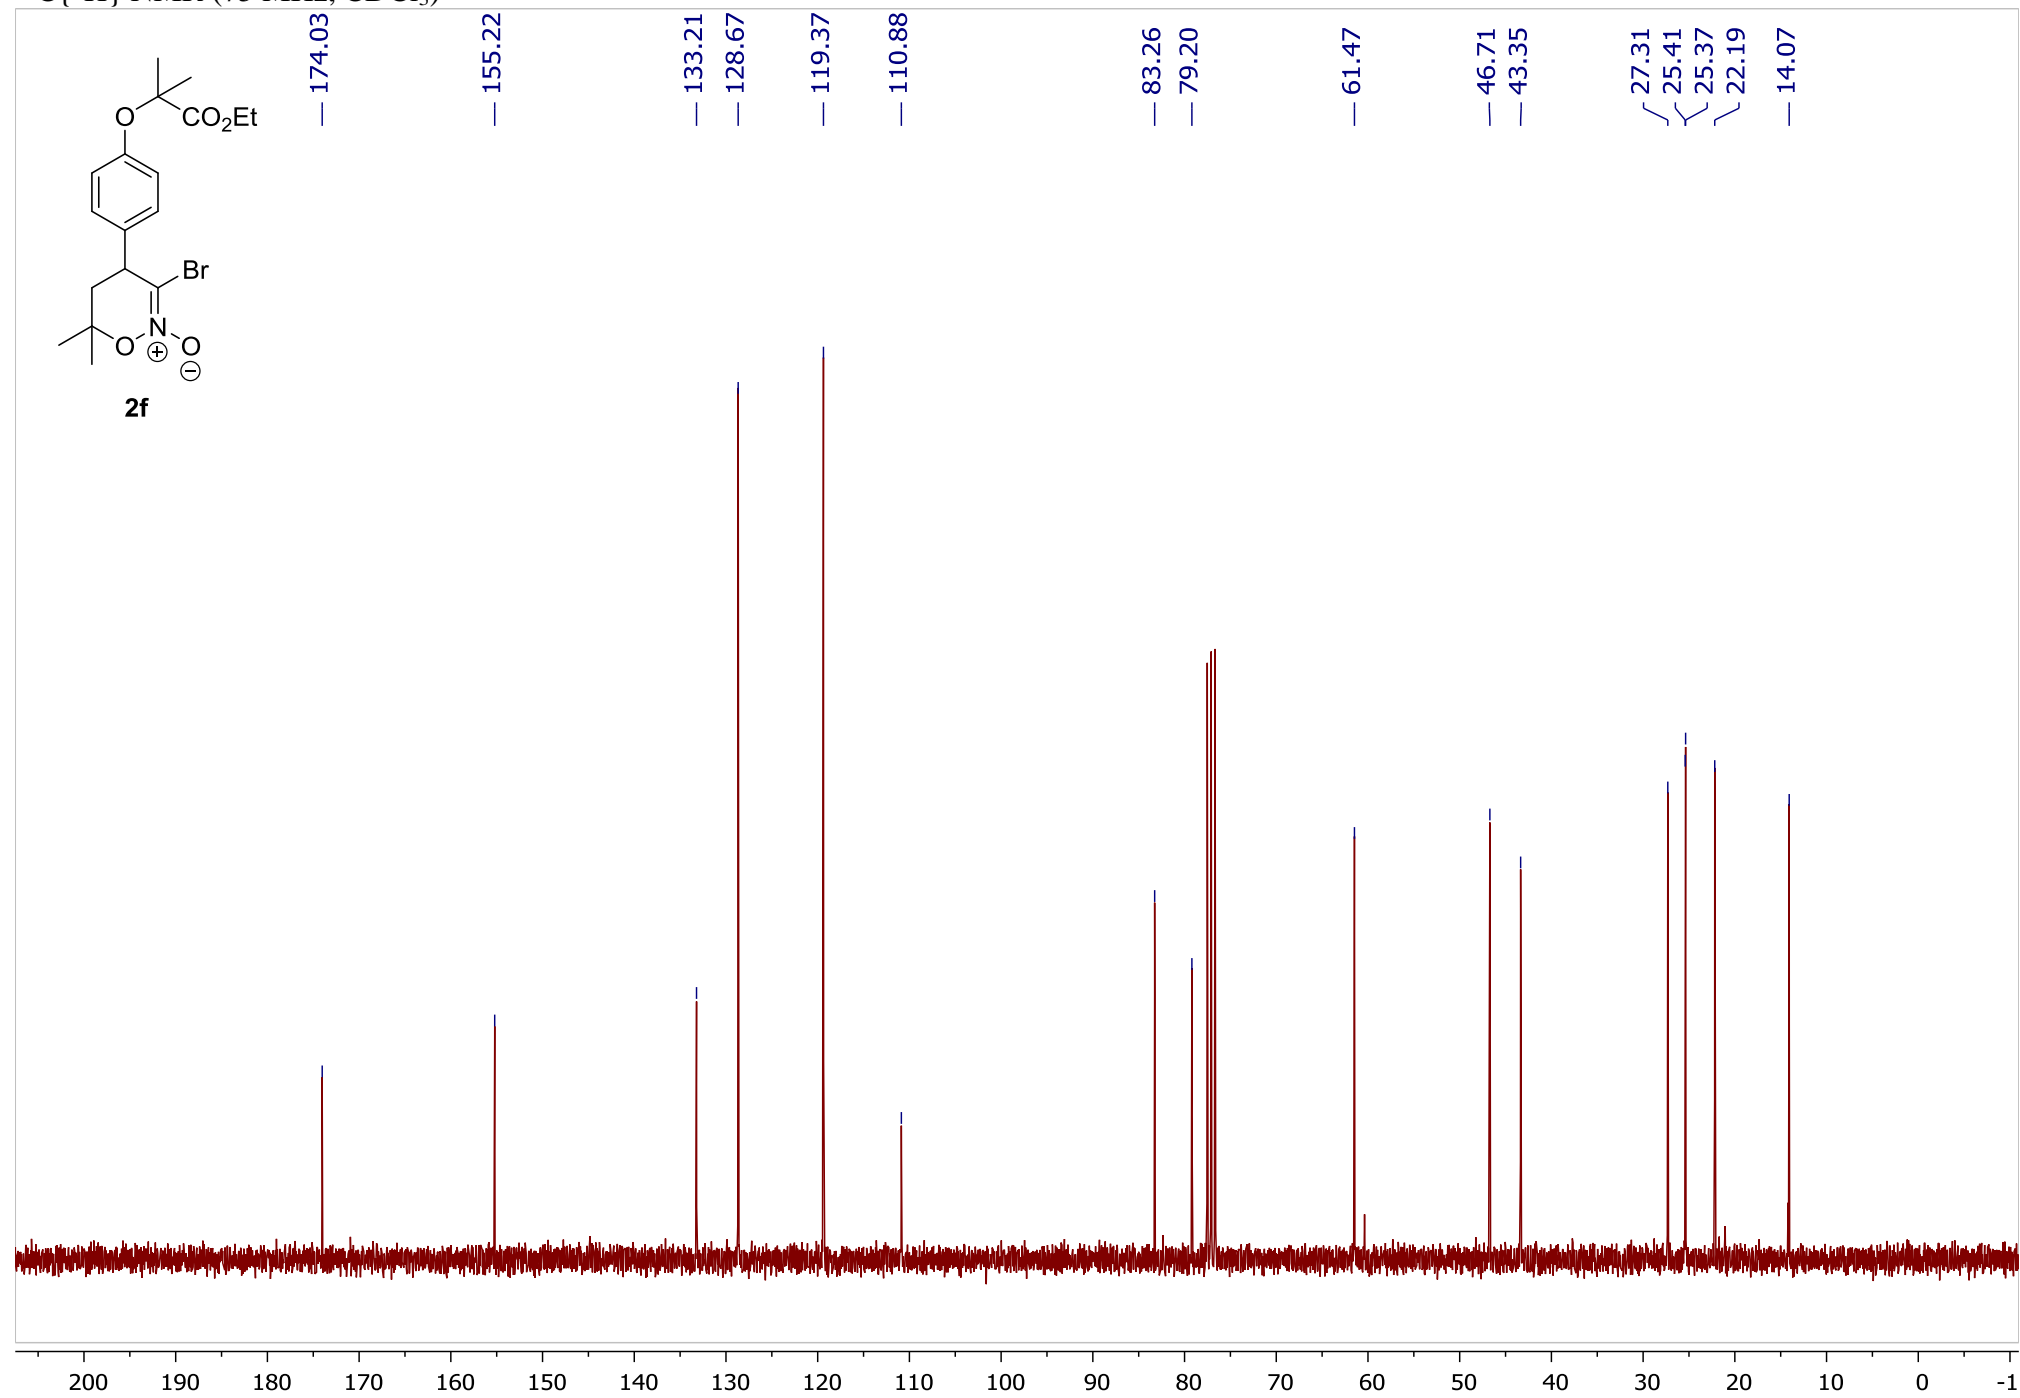

$^{13}\text{C}$  DEPT 135 (75 MHz,  $\text{CDCl}_3$ )

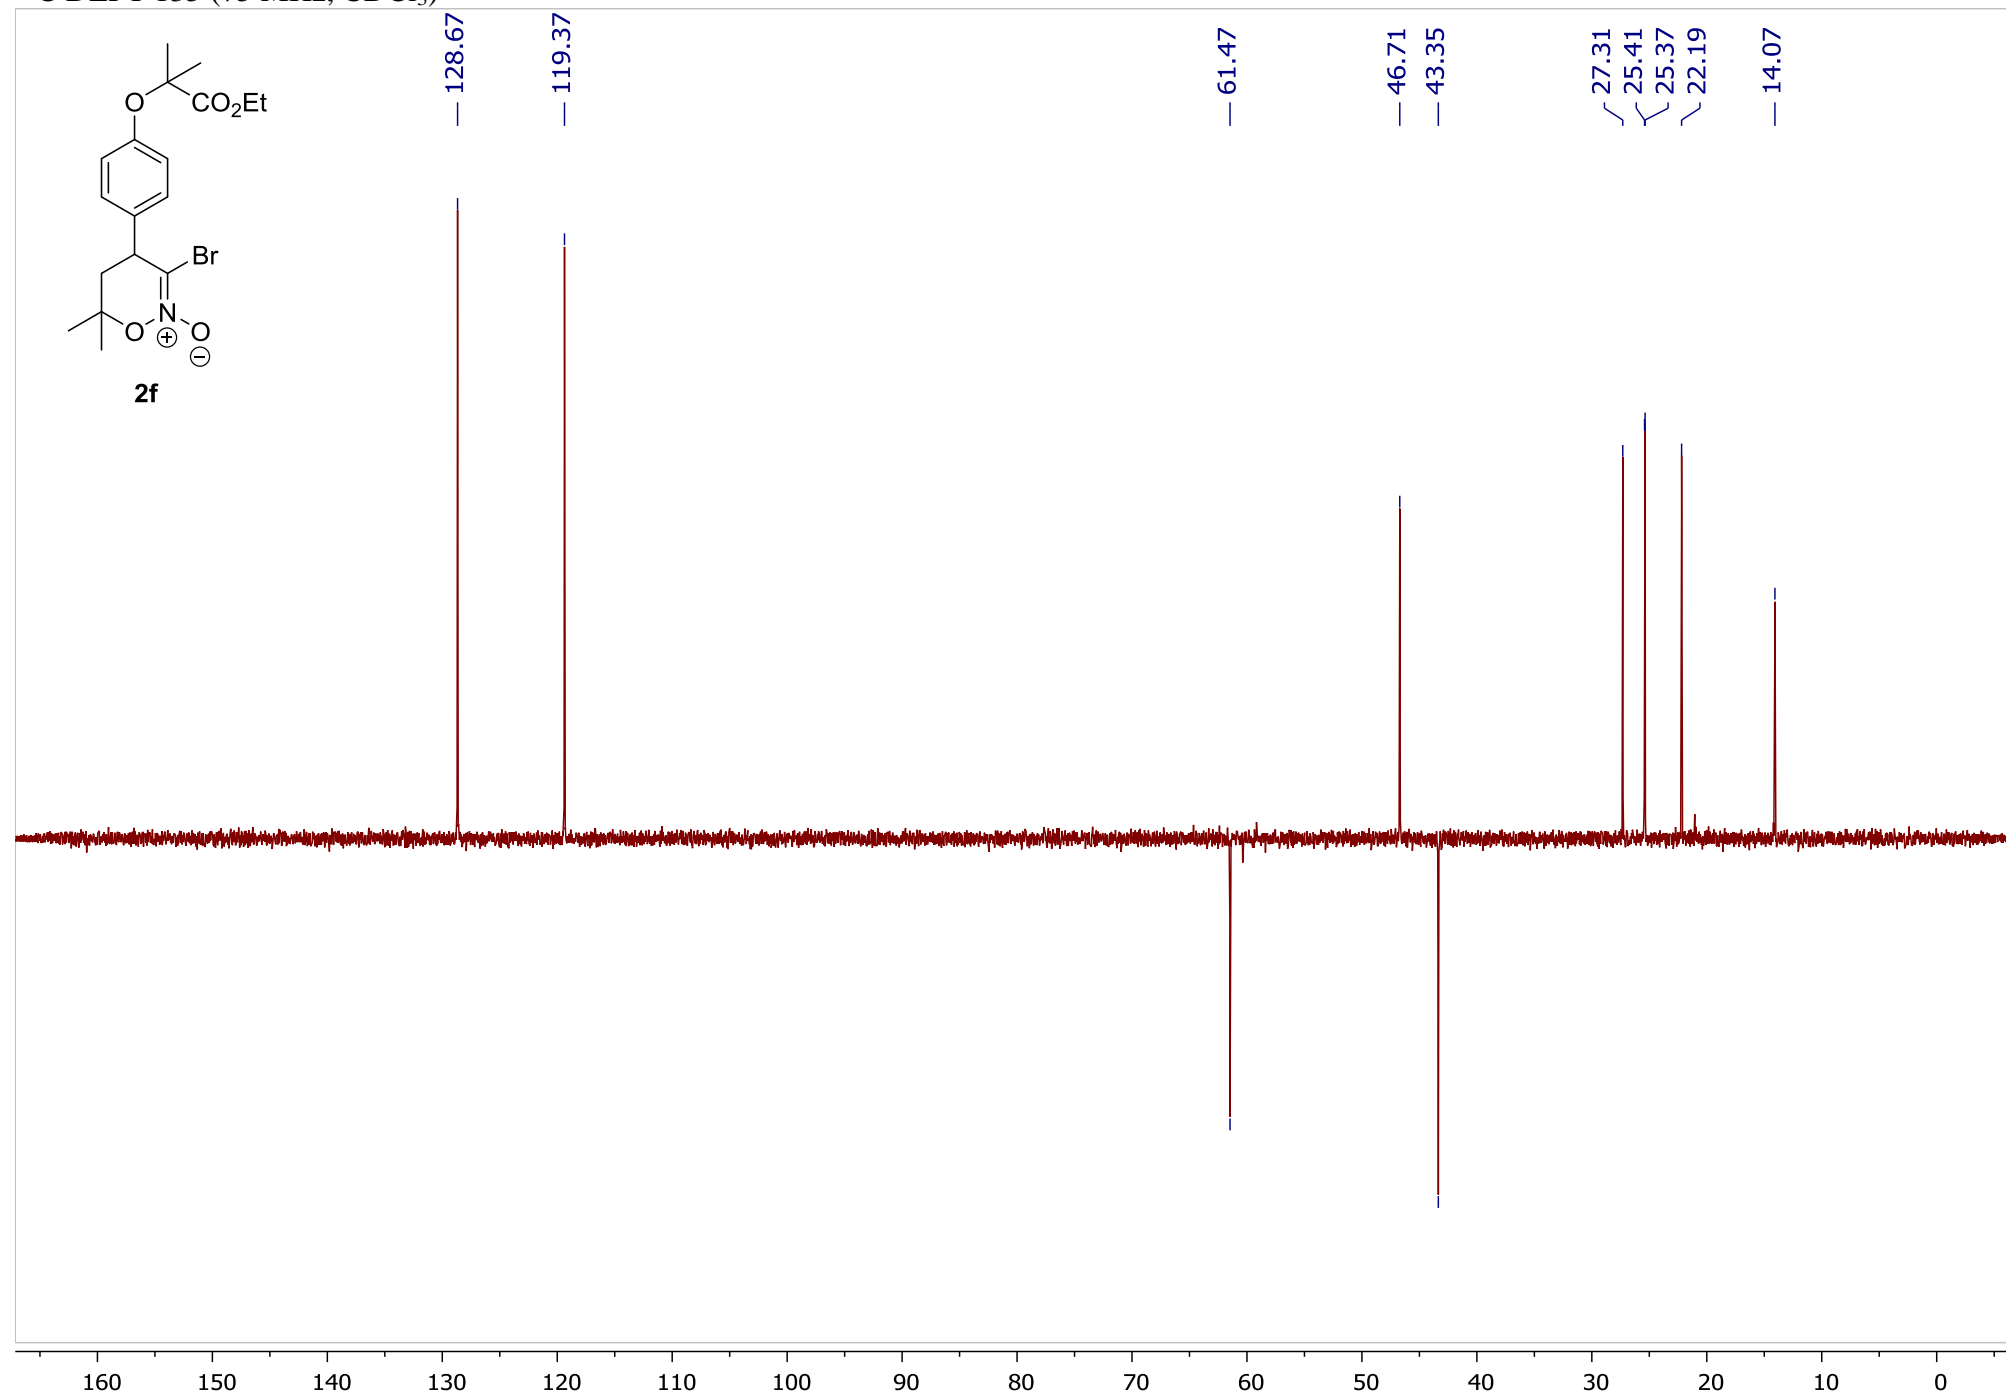



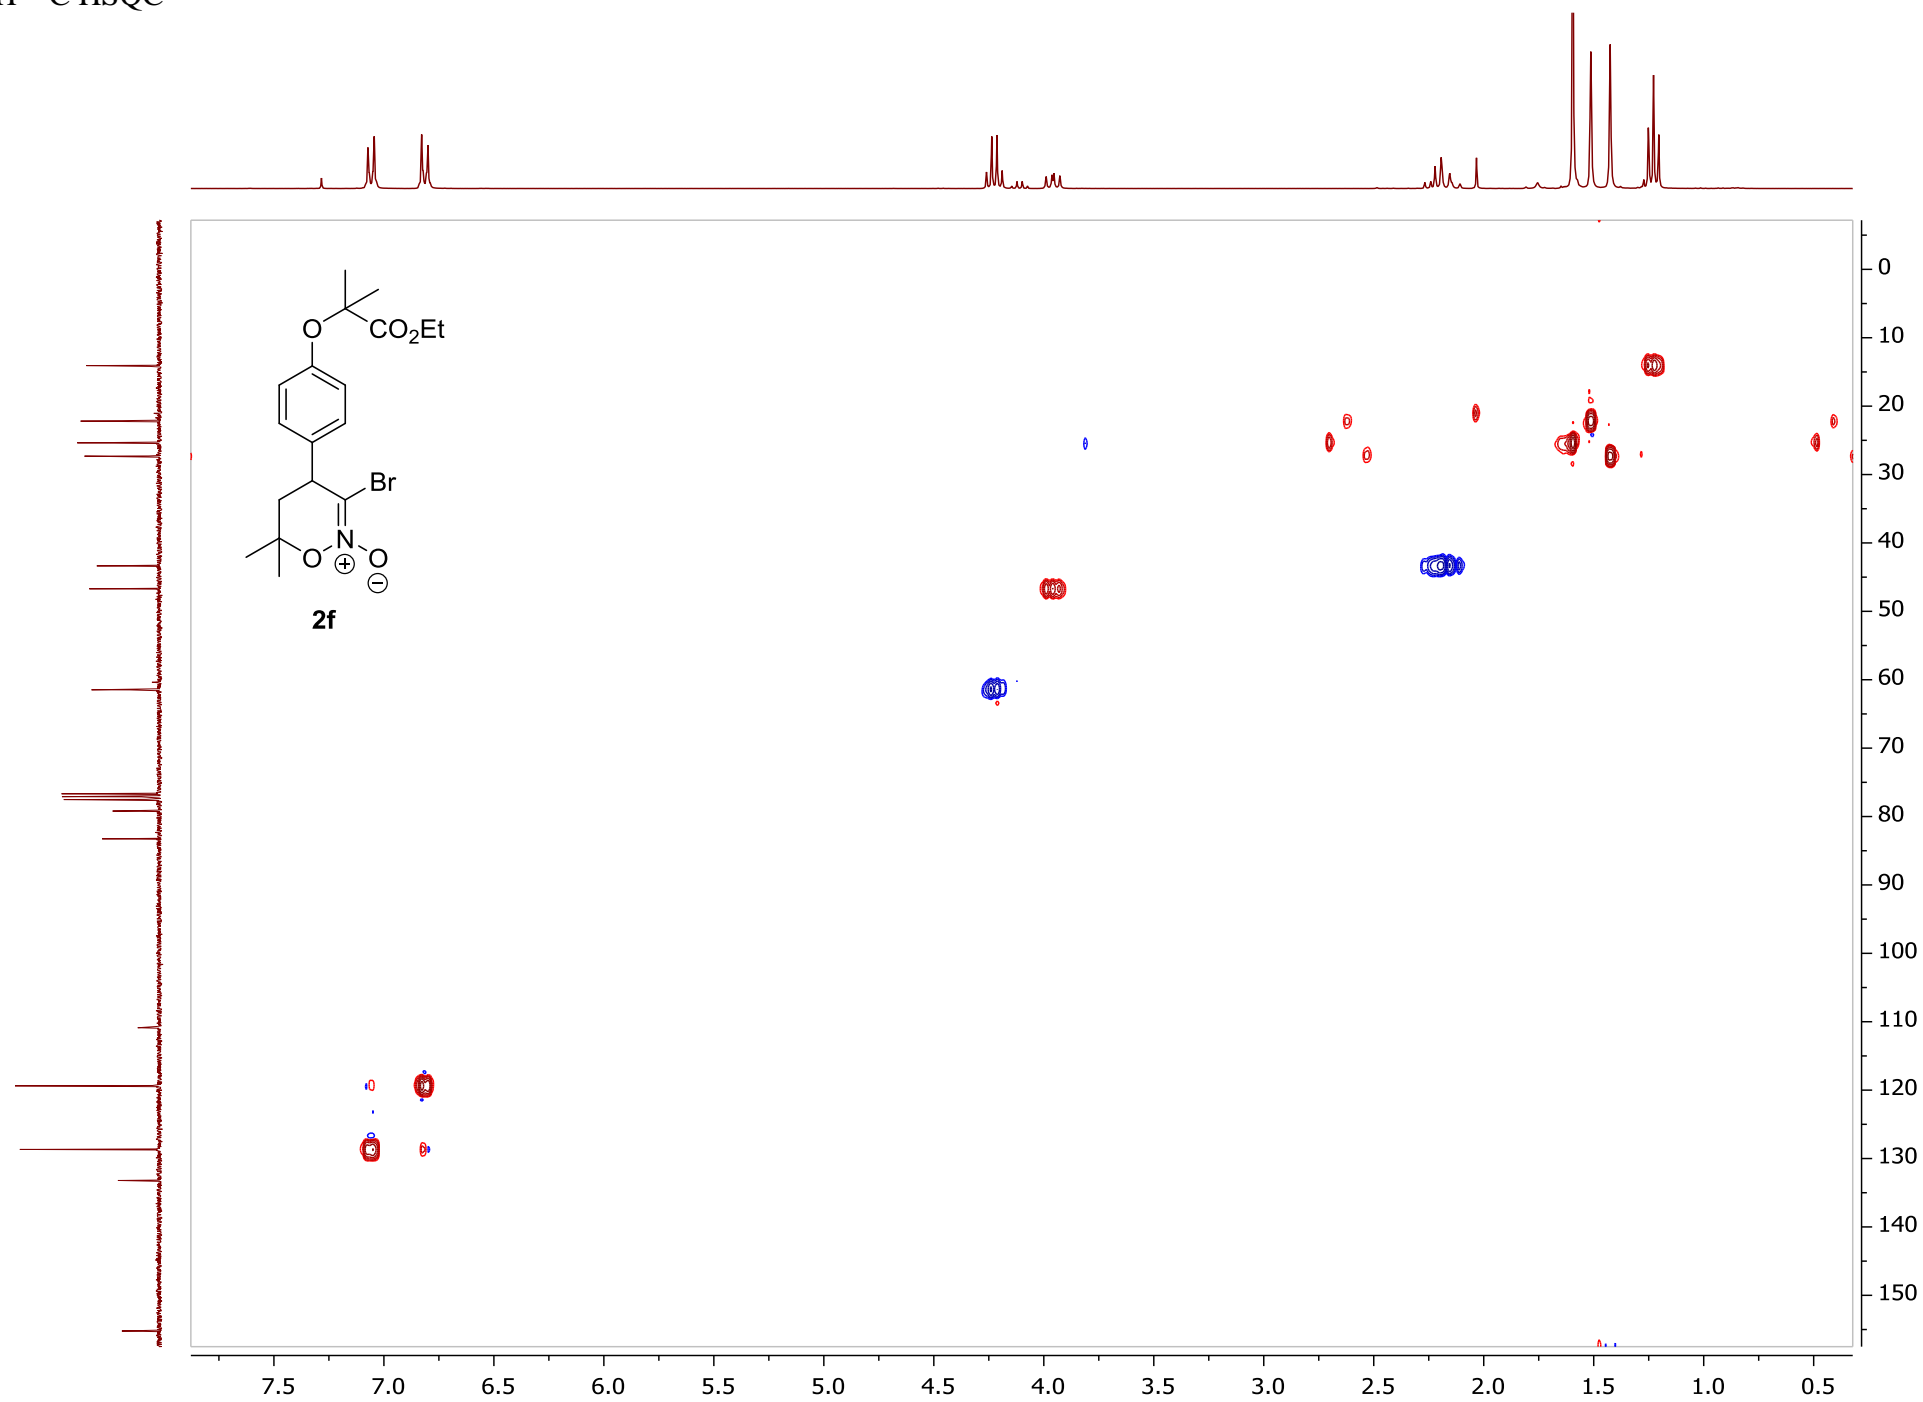

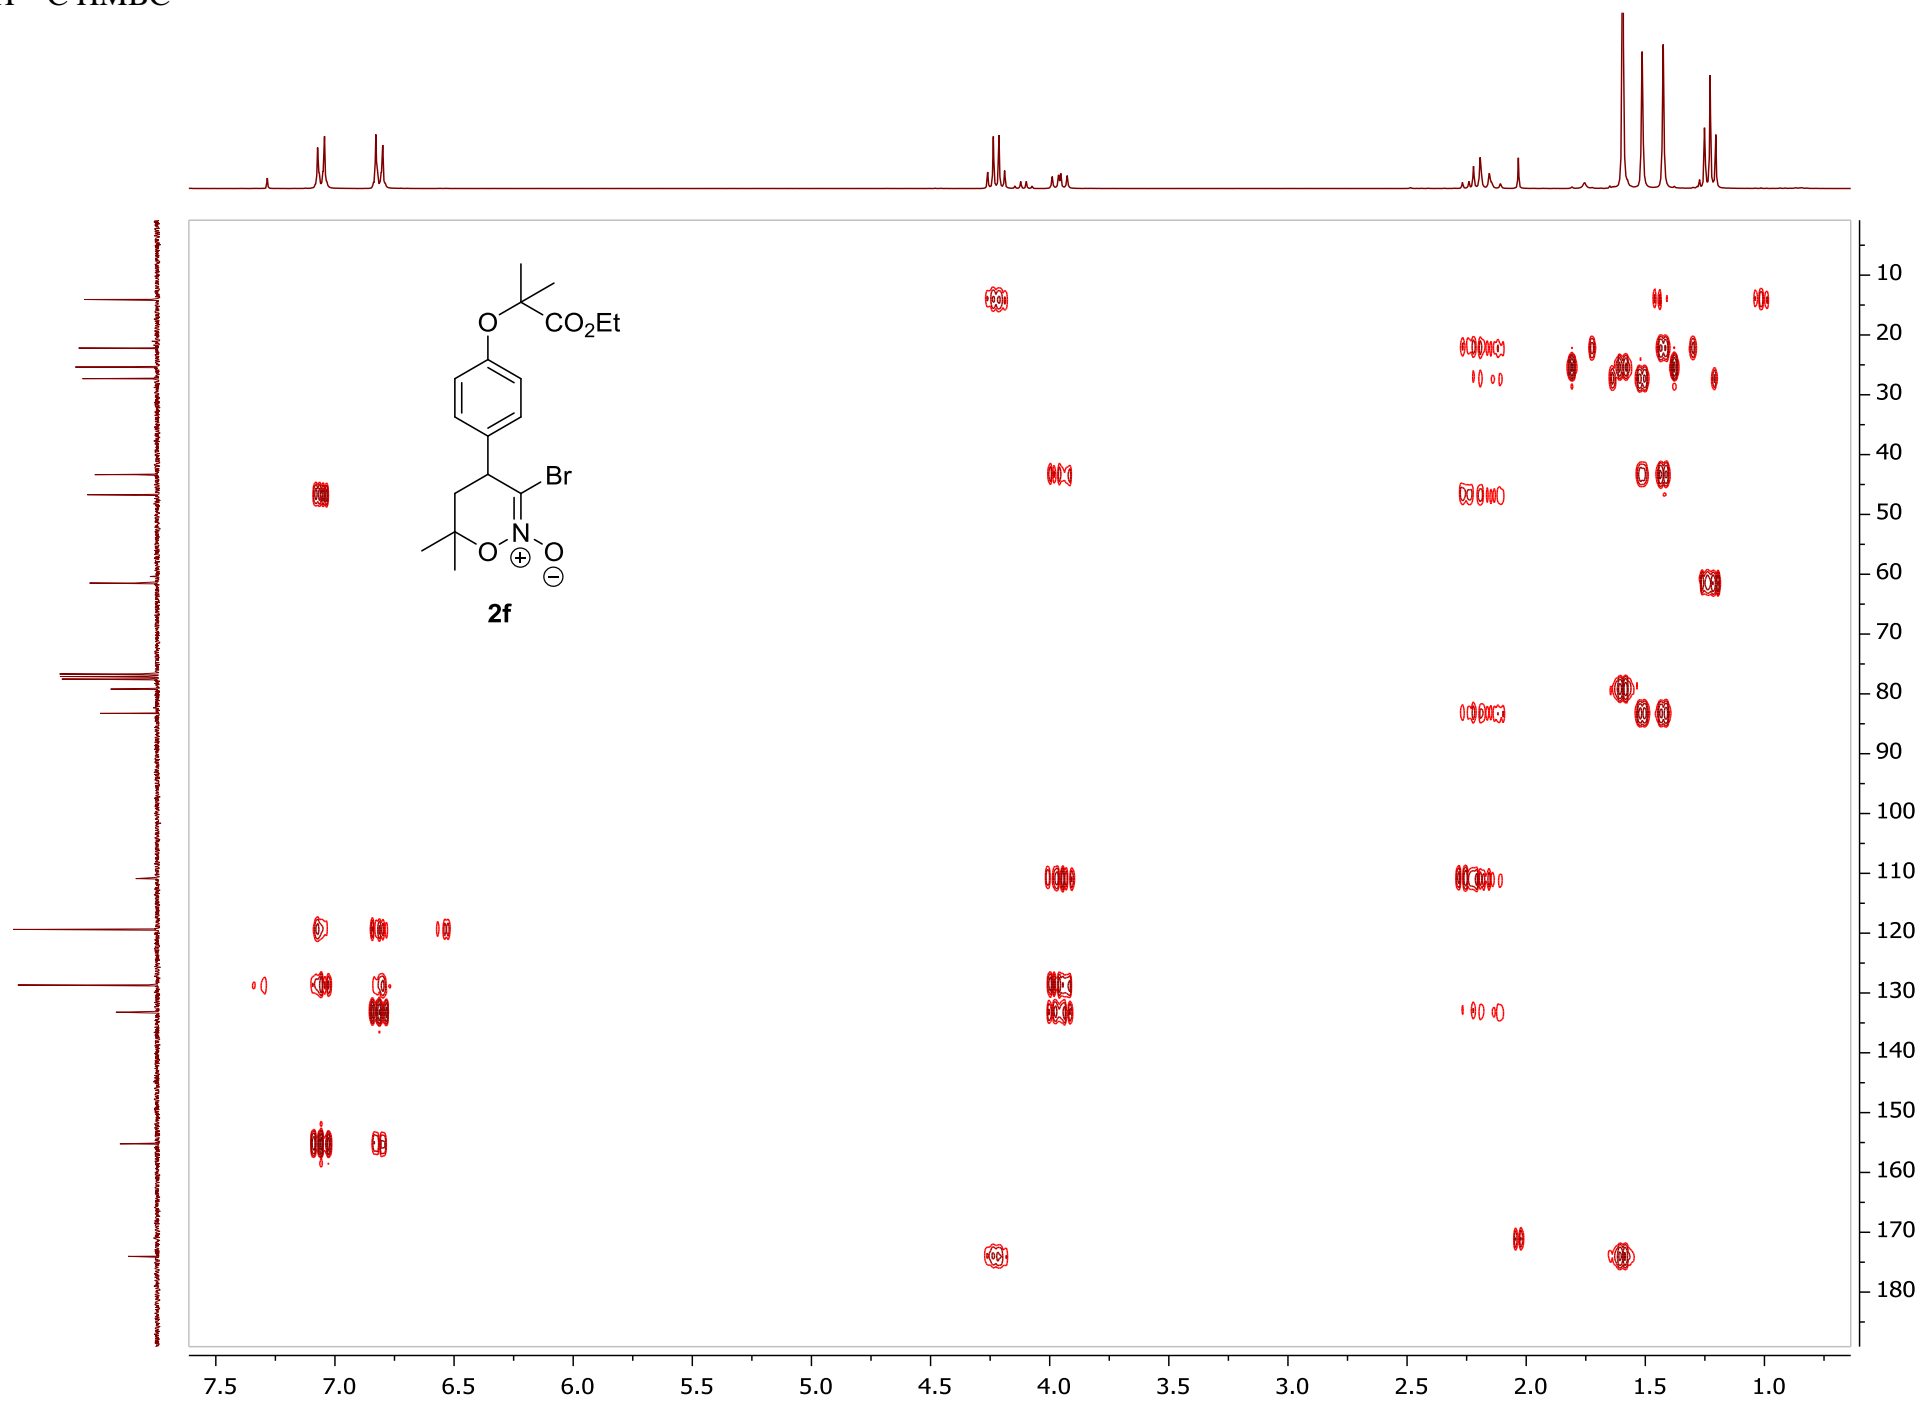

**3-Bromo-4-(3-methoxyphenyl)-6,6-dimethyl-5,6-dihydro-4H-1,2-oxazine 2-oxide 2g**

<sup>1</sup>H NMR (300 MHz, CDCl<sub>3</sub>)

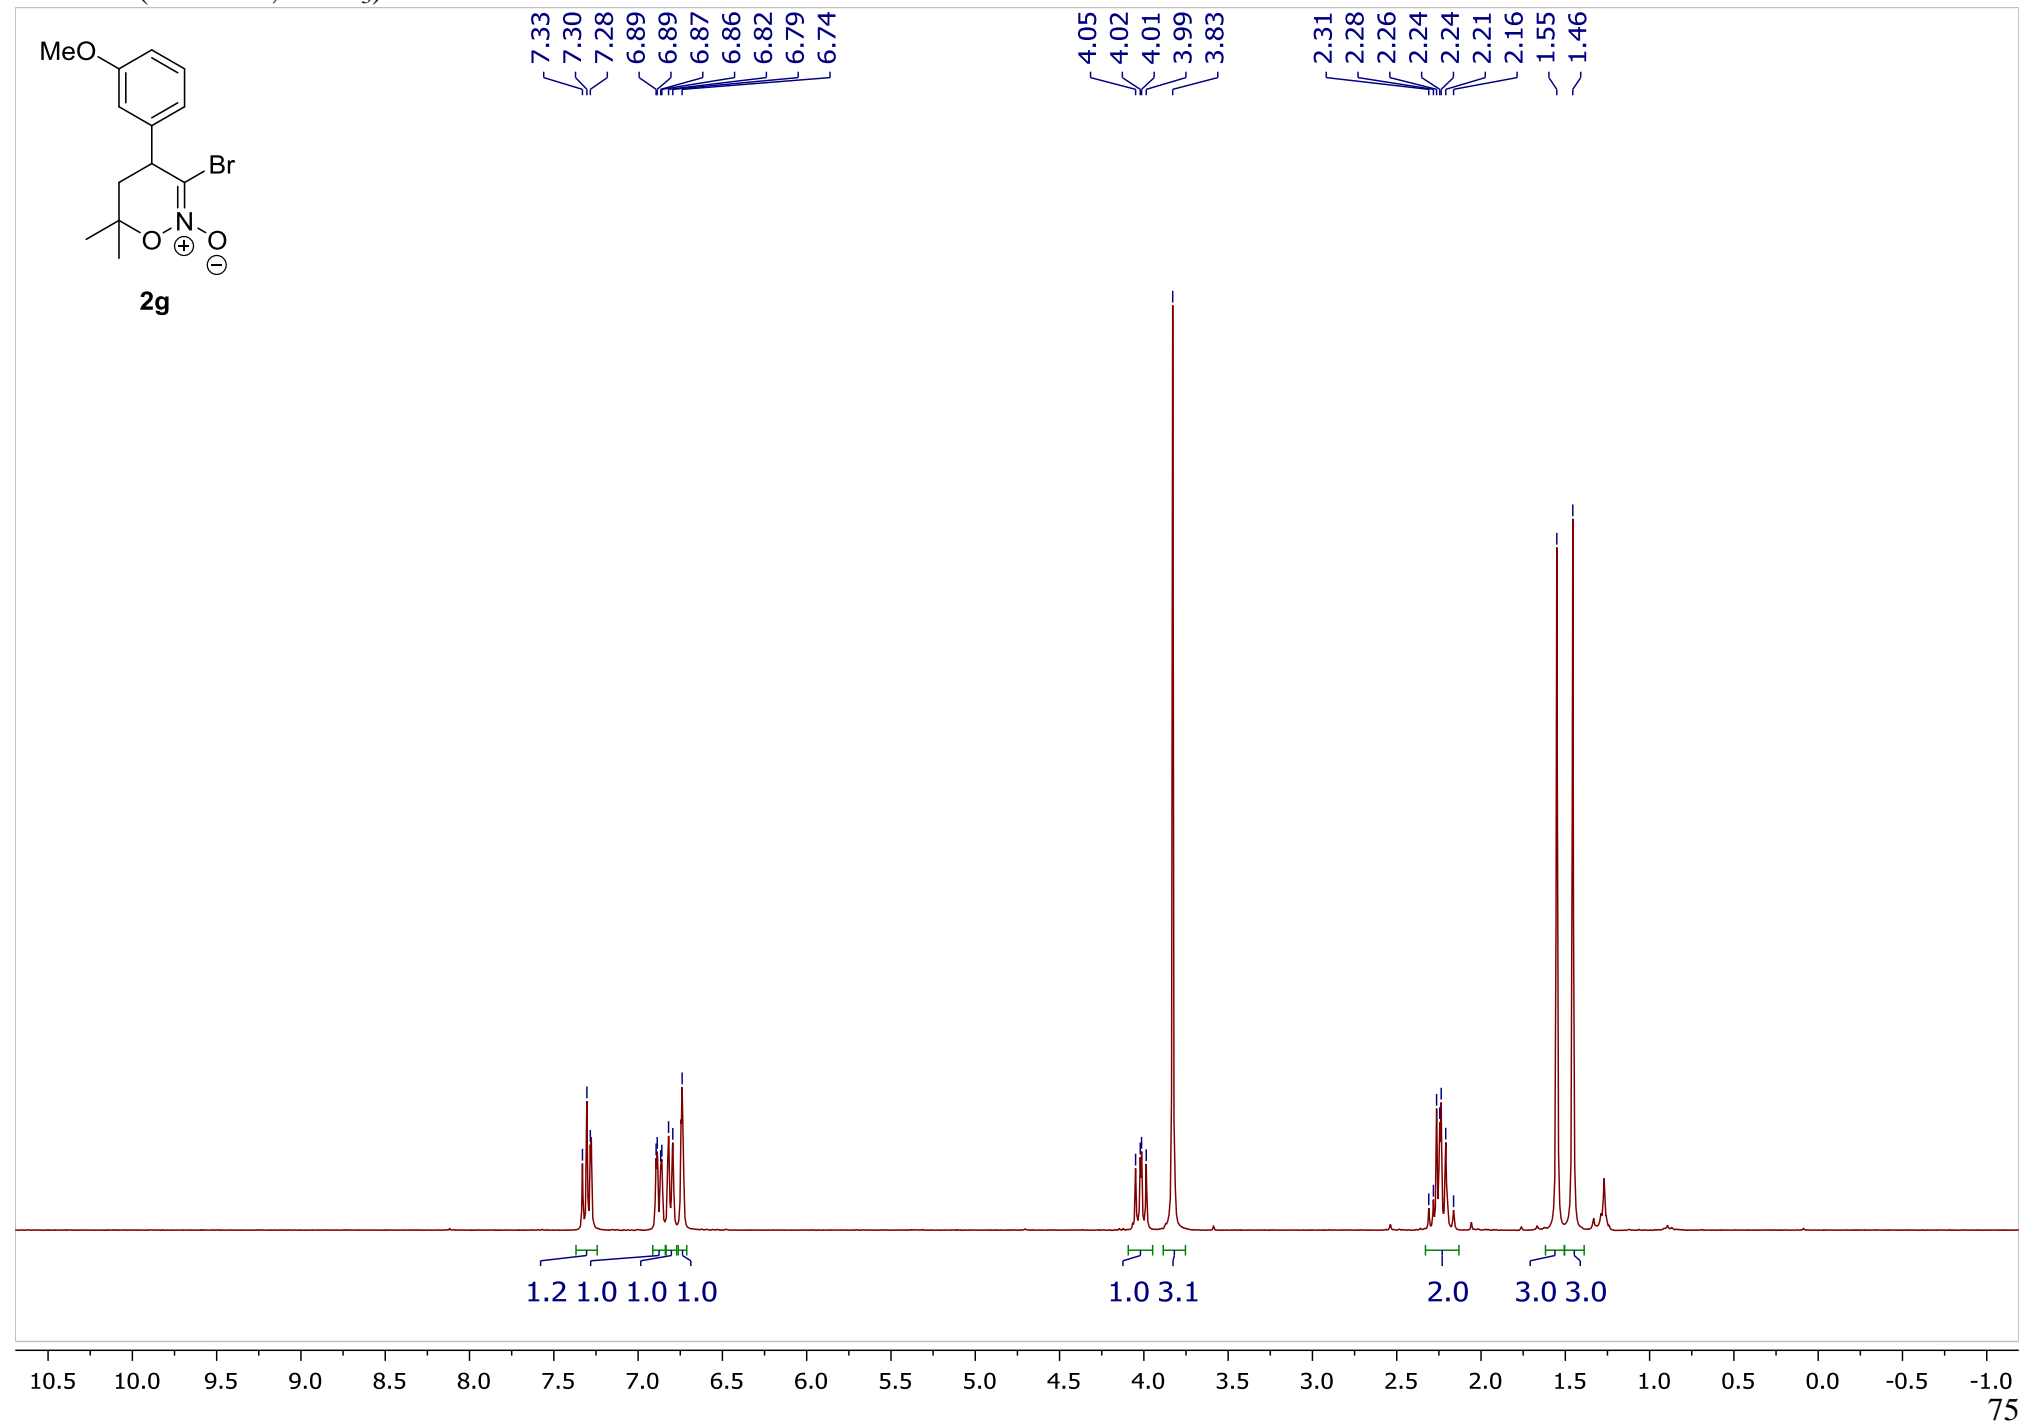

$^{13}\text{C}\{^1\text{H}\}$  NMR (75 MHz,  $\text{CDCl}_3$ )

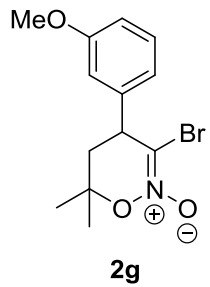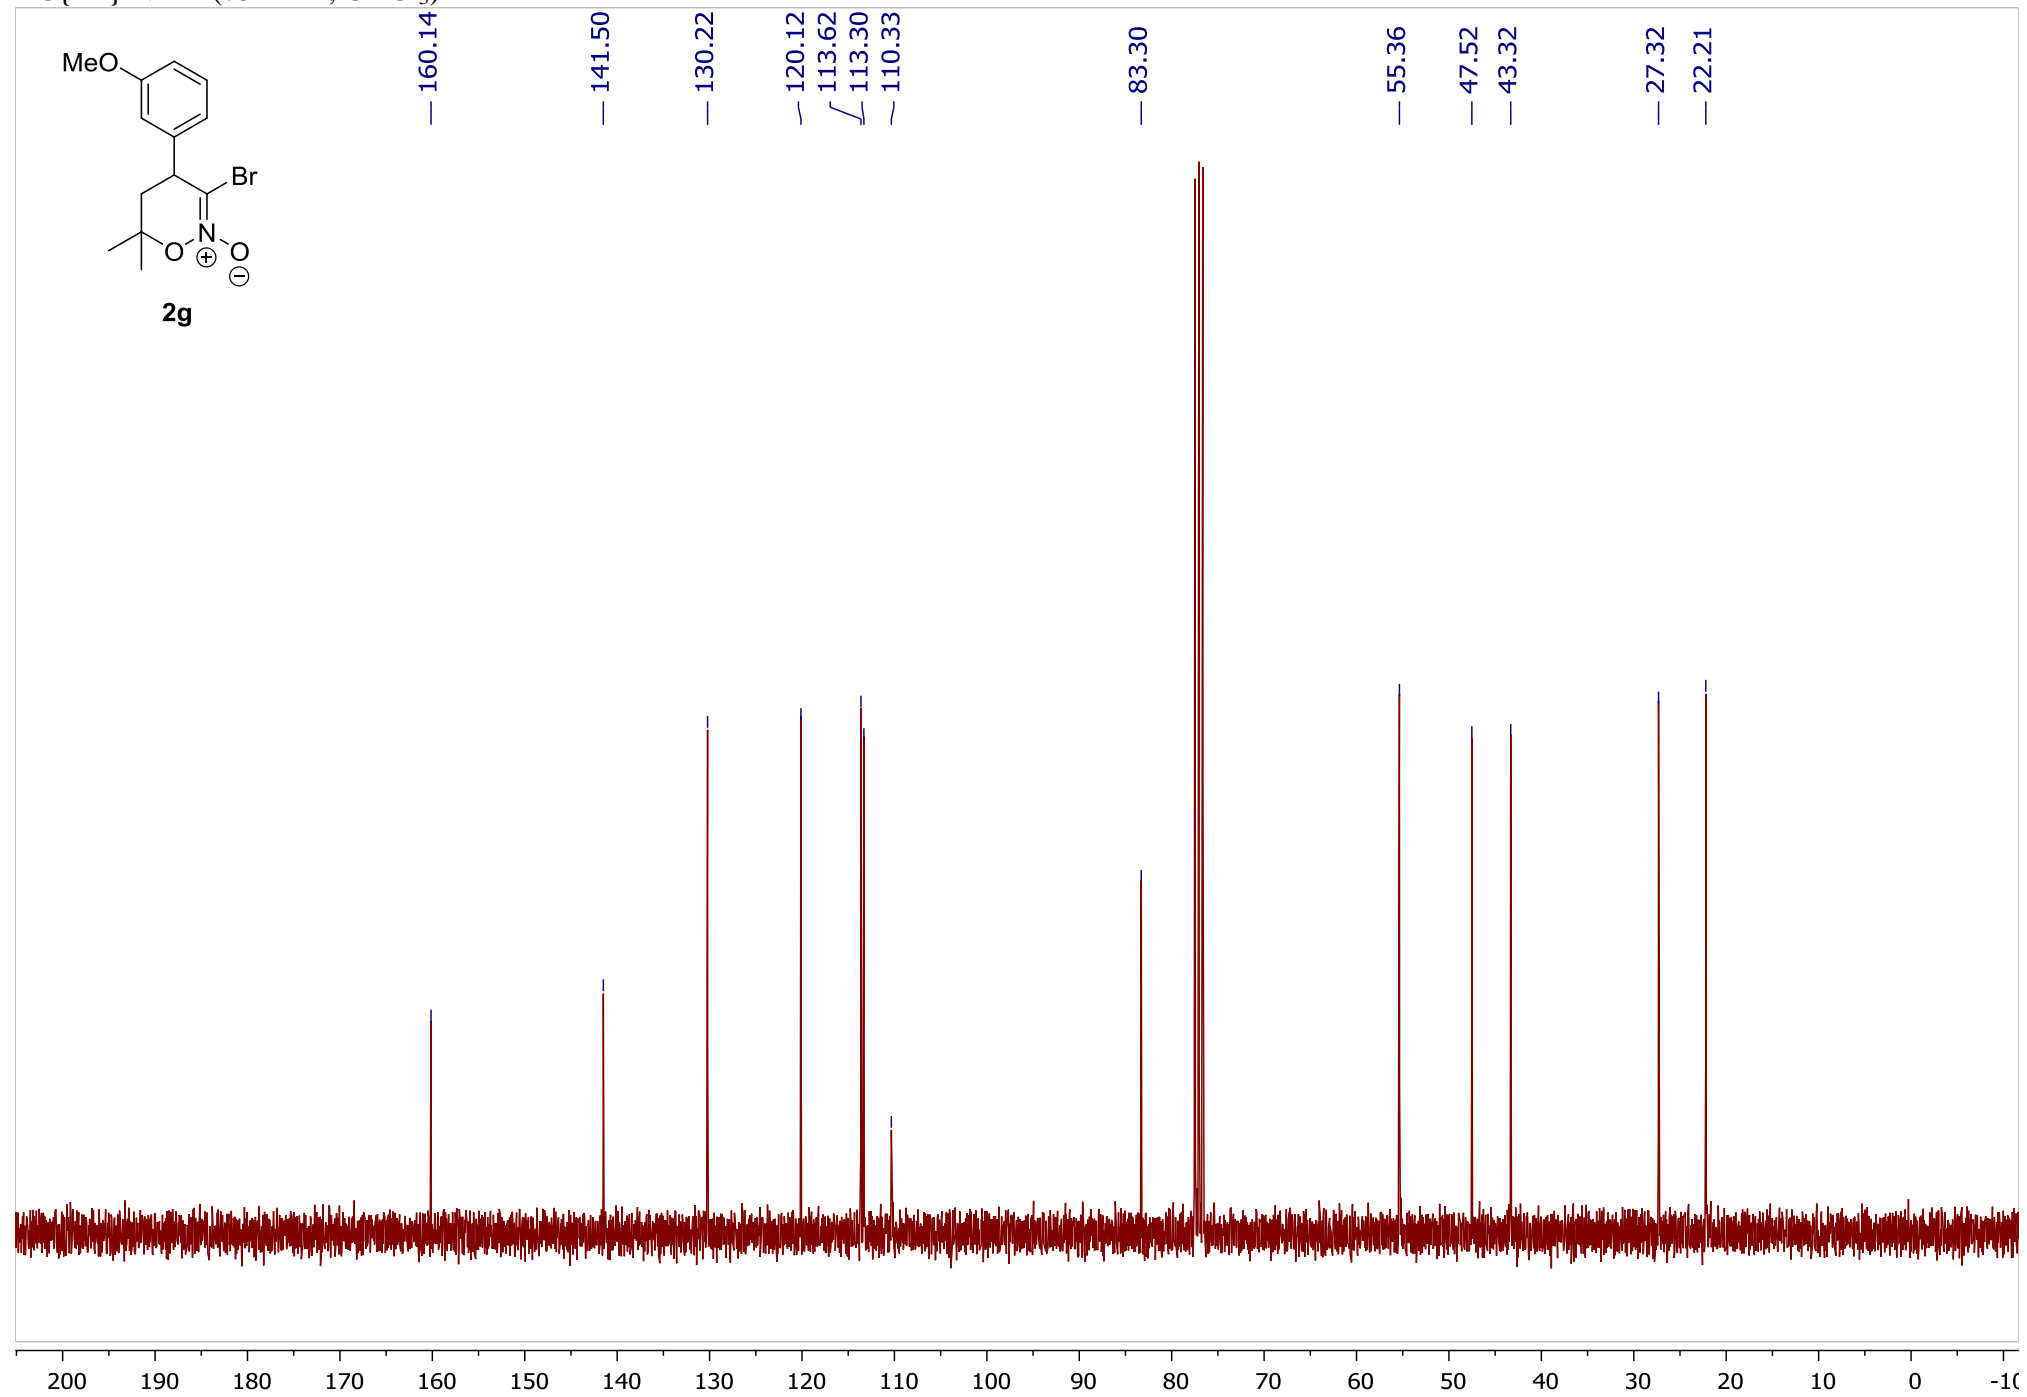

$^{13}\text{C}$  DEPT 135 (75 MHz,  $\text{CDCl}_3$ )

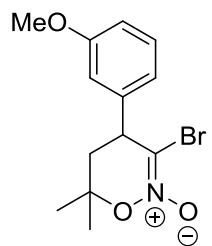

**2g**

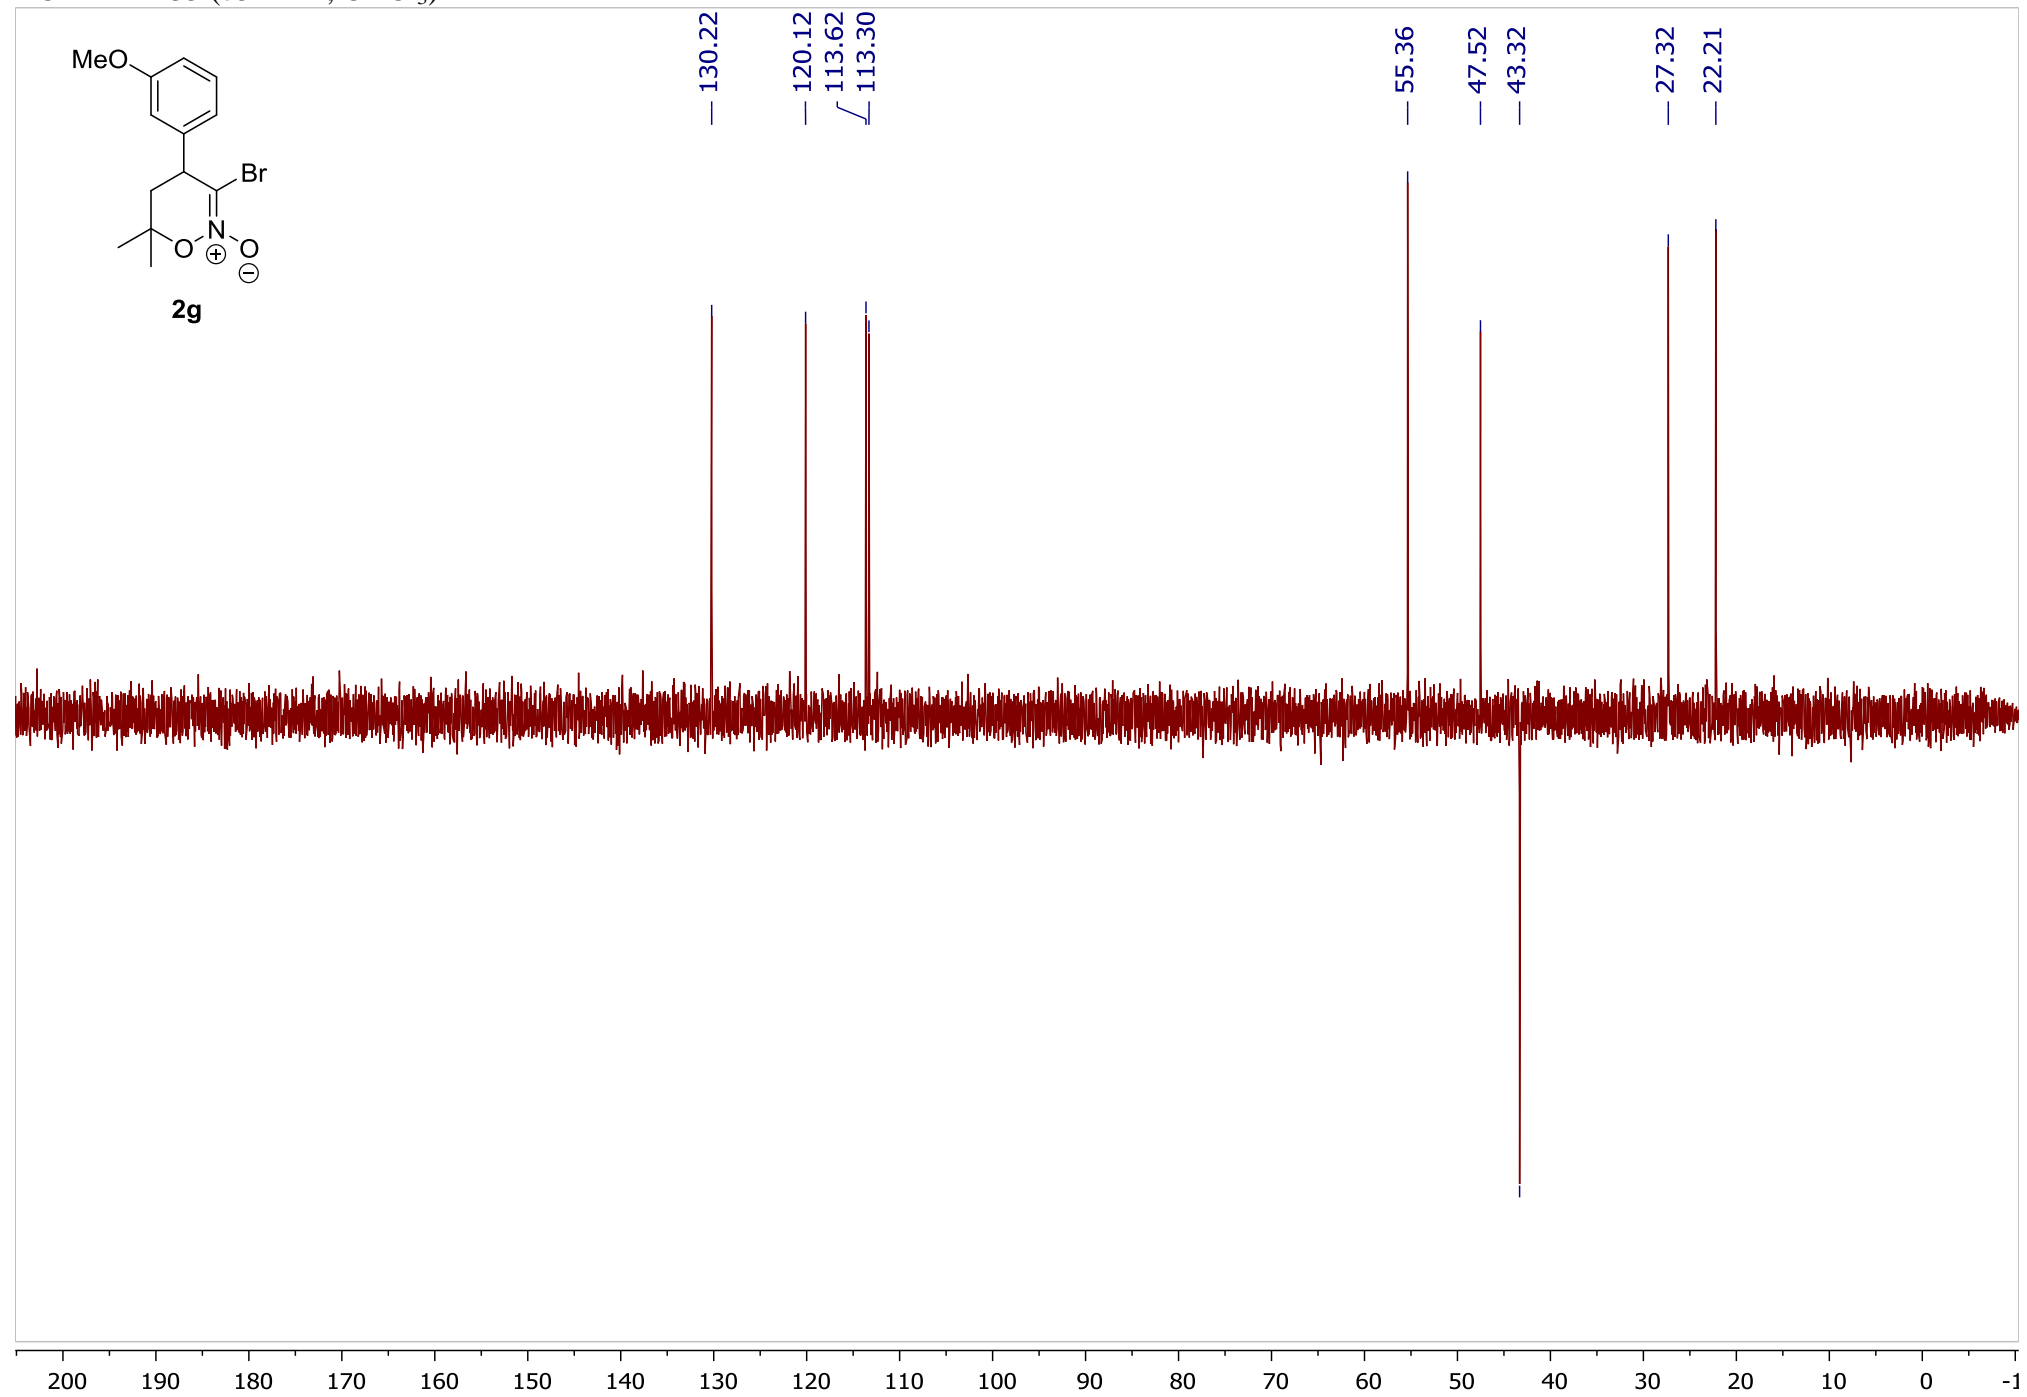

**3-Bromo-4-(2-methoxyphenyl)-6,6-dimethyl-5,6-dihydro-4H-1,2-oxazine 2-oxide 2h**

<sup>1</sup>H NMR (300 MHz, CDCl<sub>3</sub>)

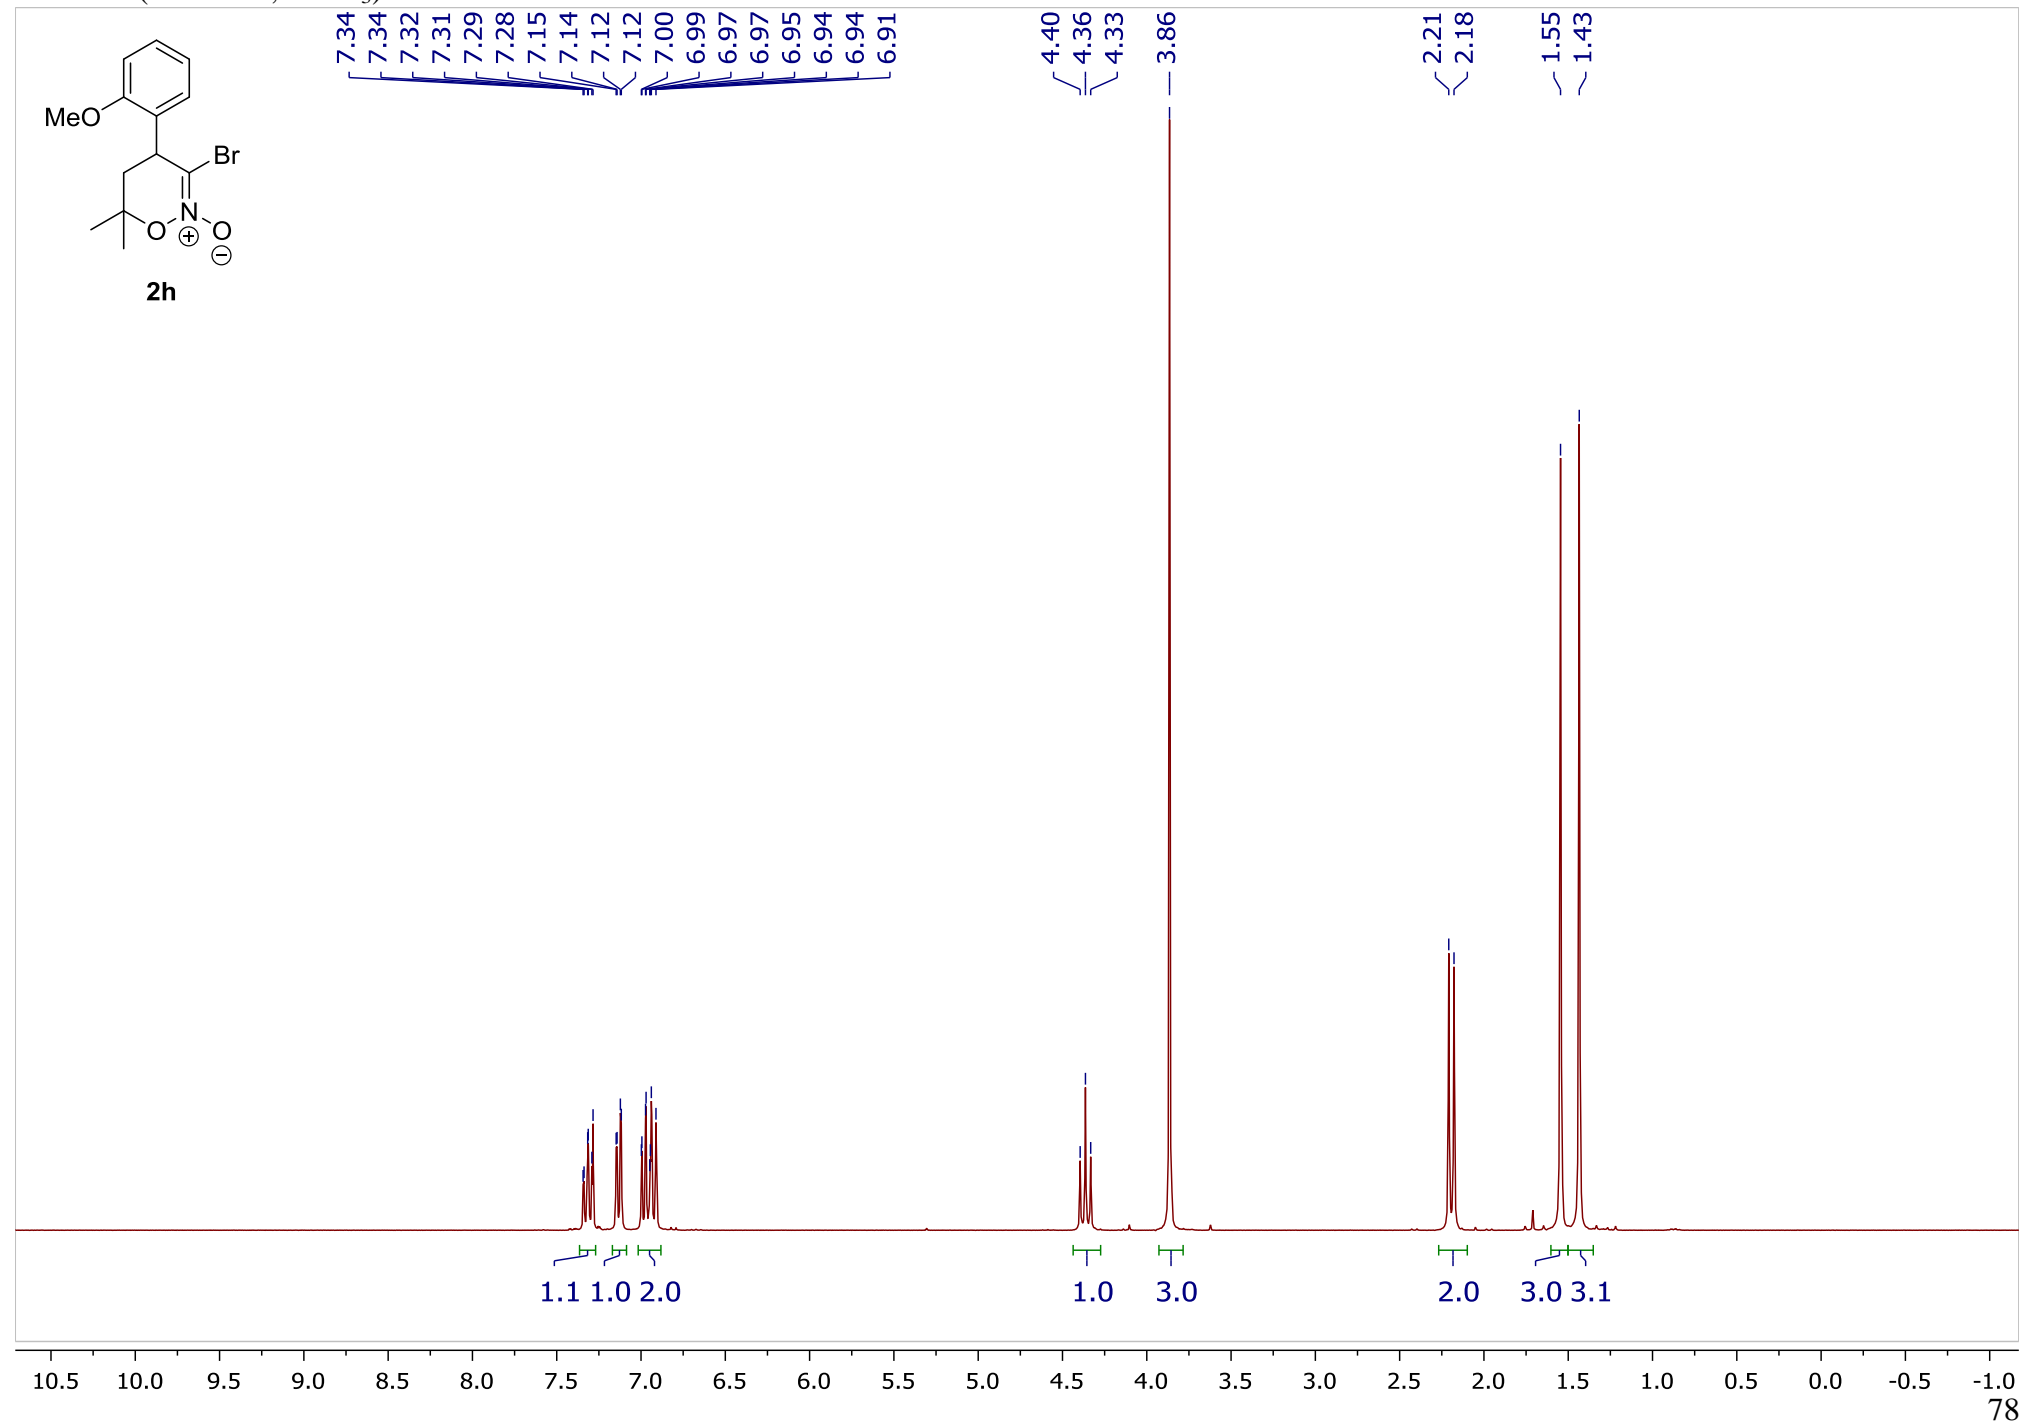

$^{13}\text{C}\{^1\text{H}\}$  NMR (75 MHz,  $\text{CDCl}_3$ )

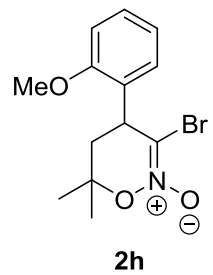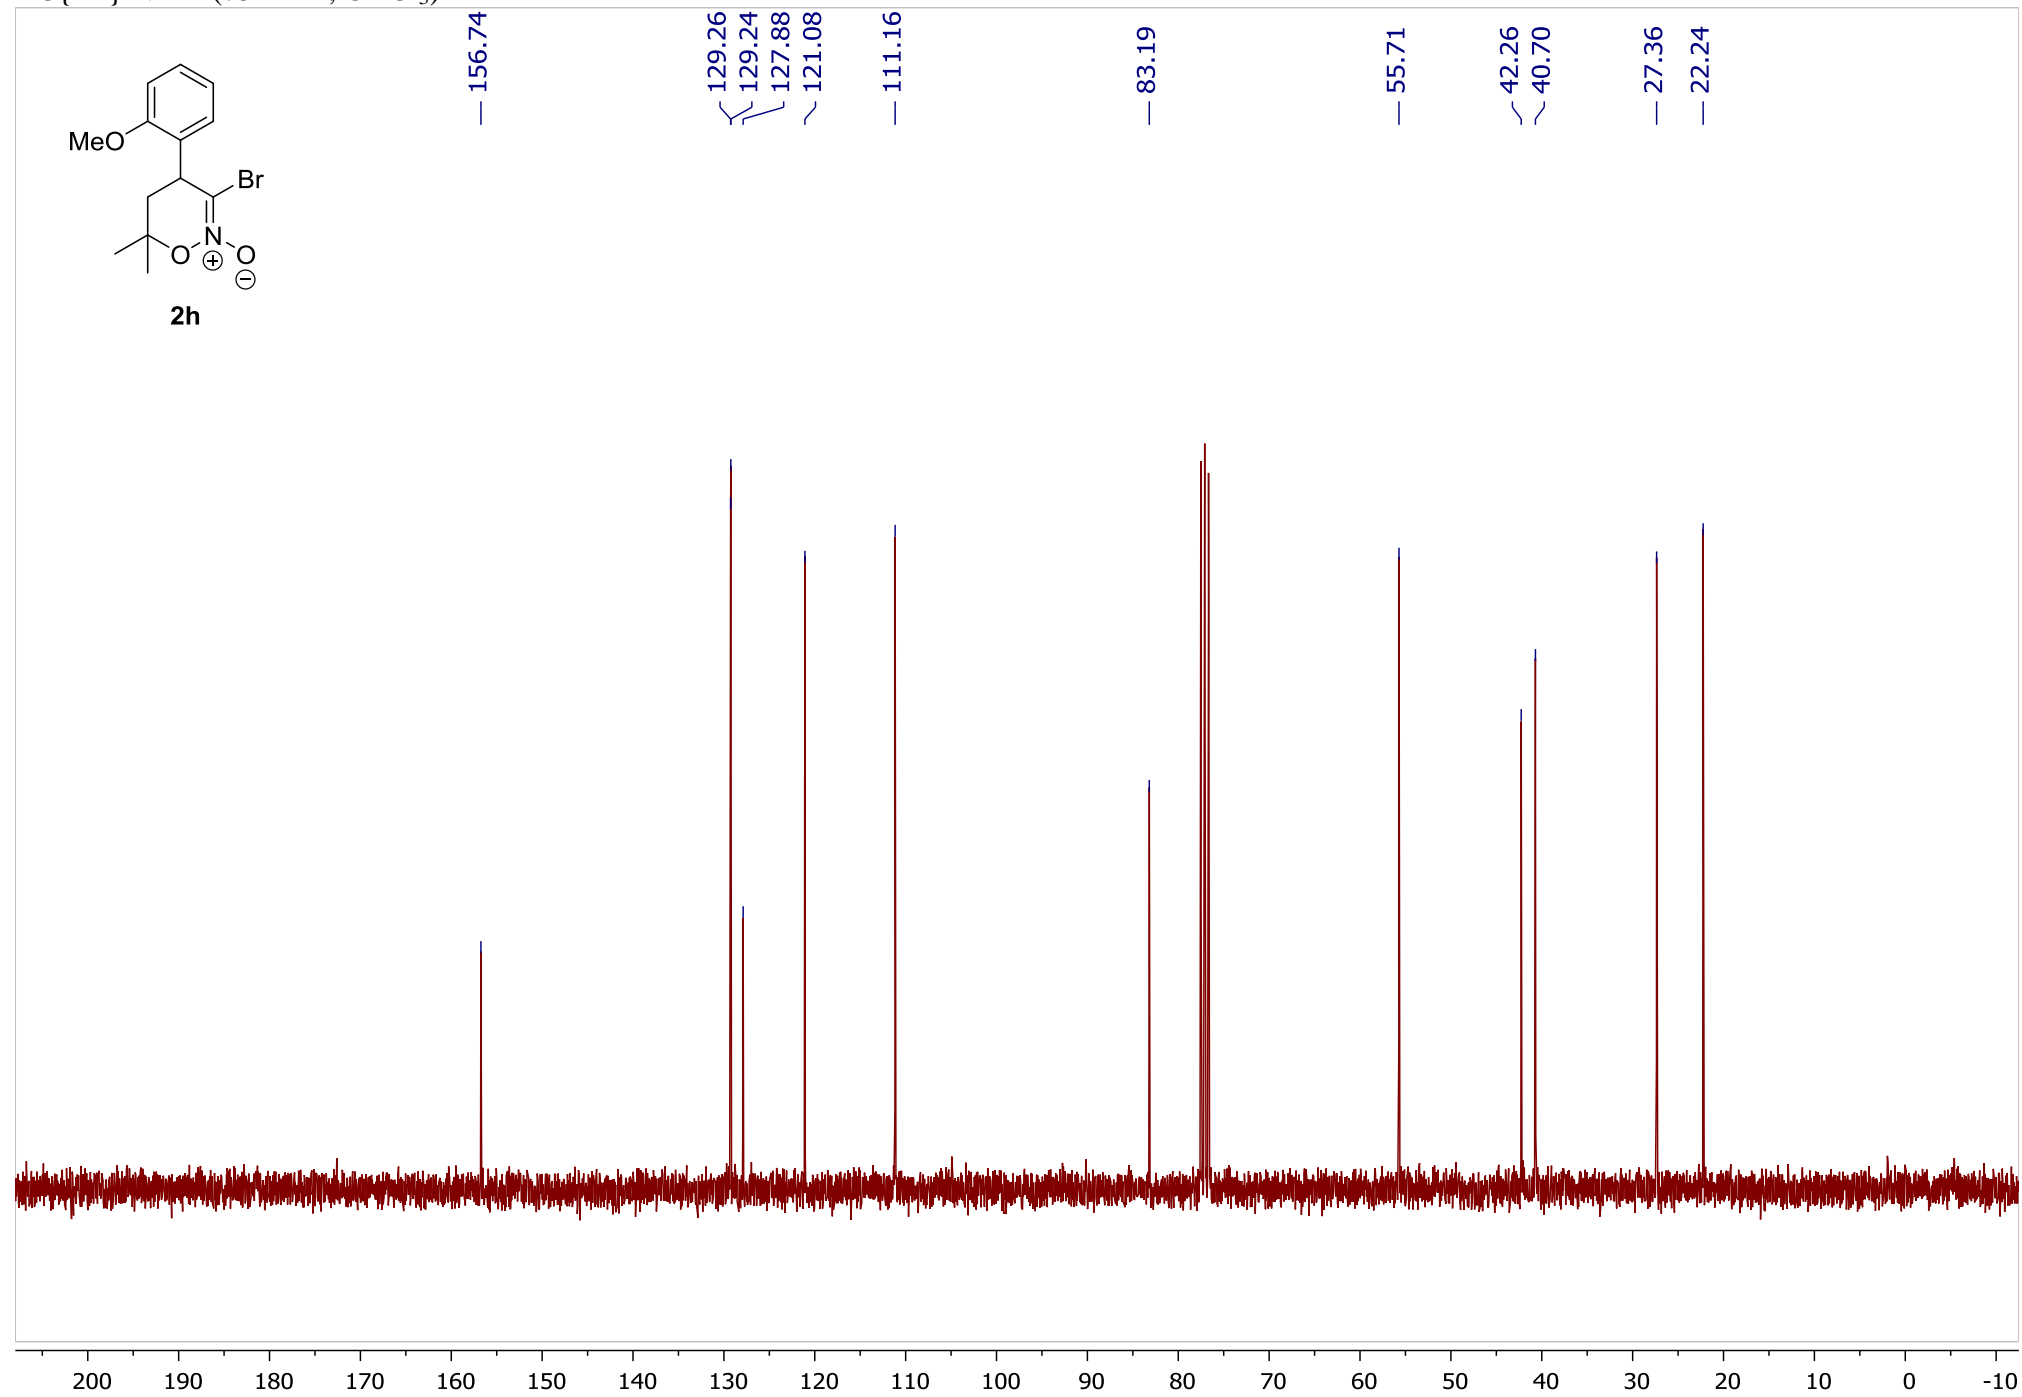

$^{13}\text{C}$  DEPT 135 (75 MHz,  $\text{CDCl}_3$ )

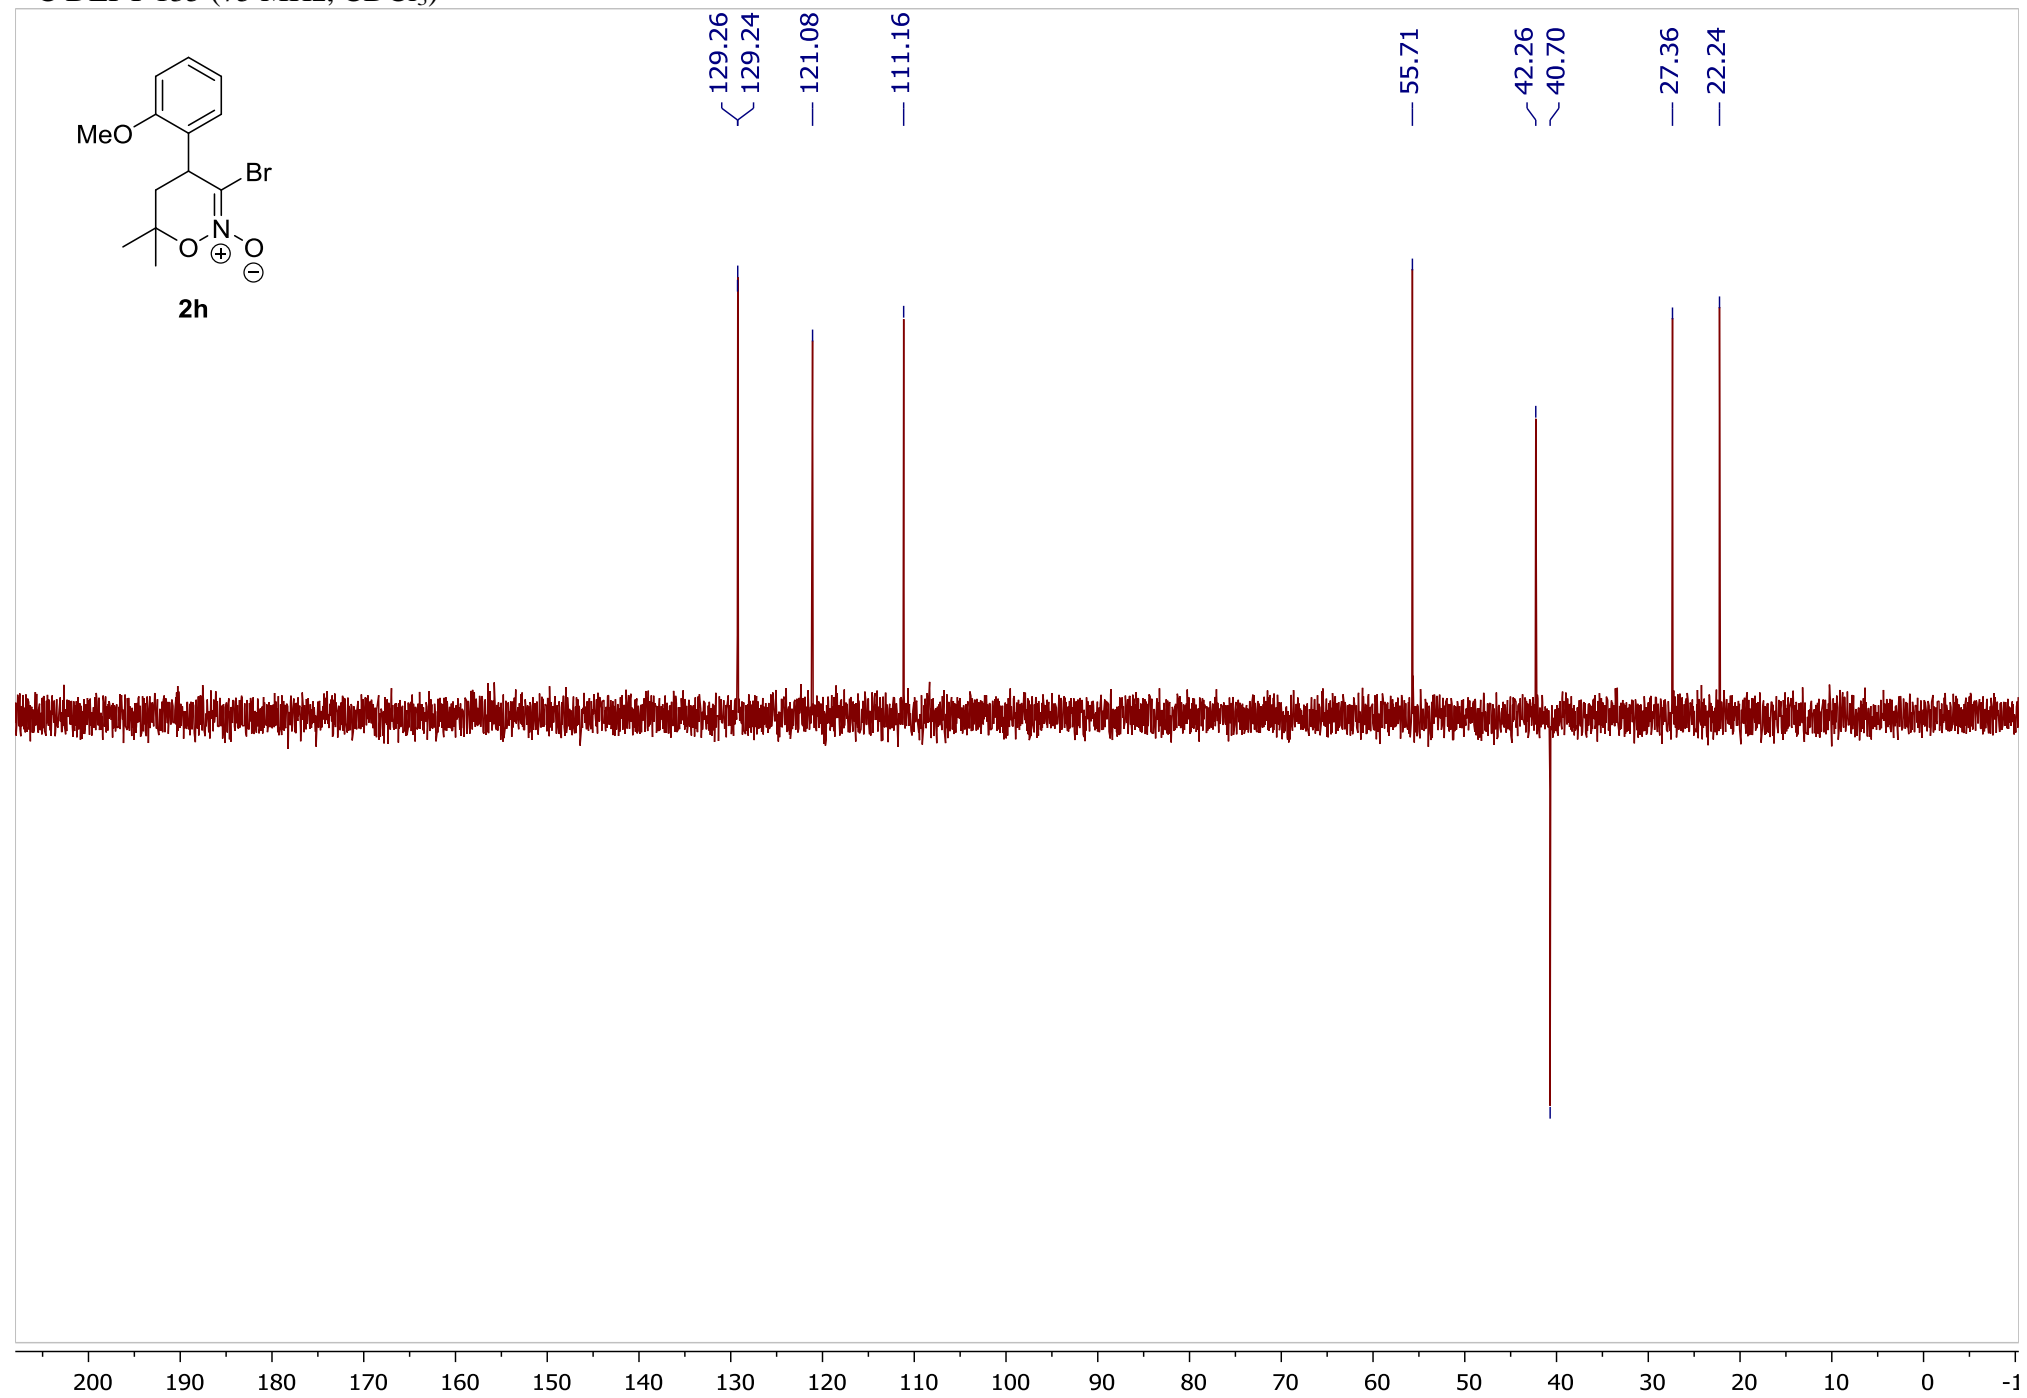



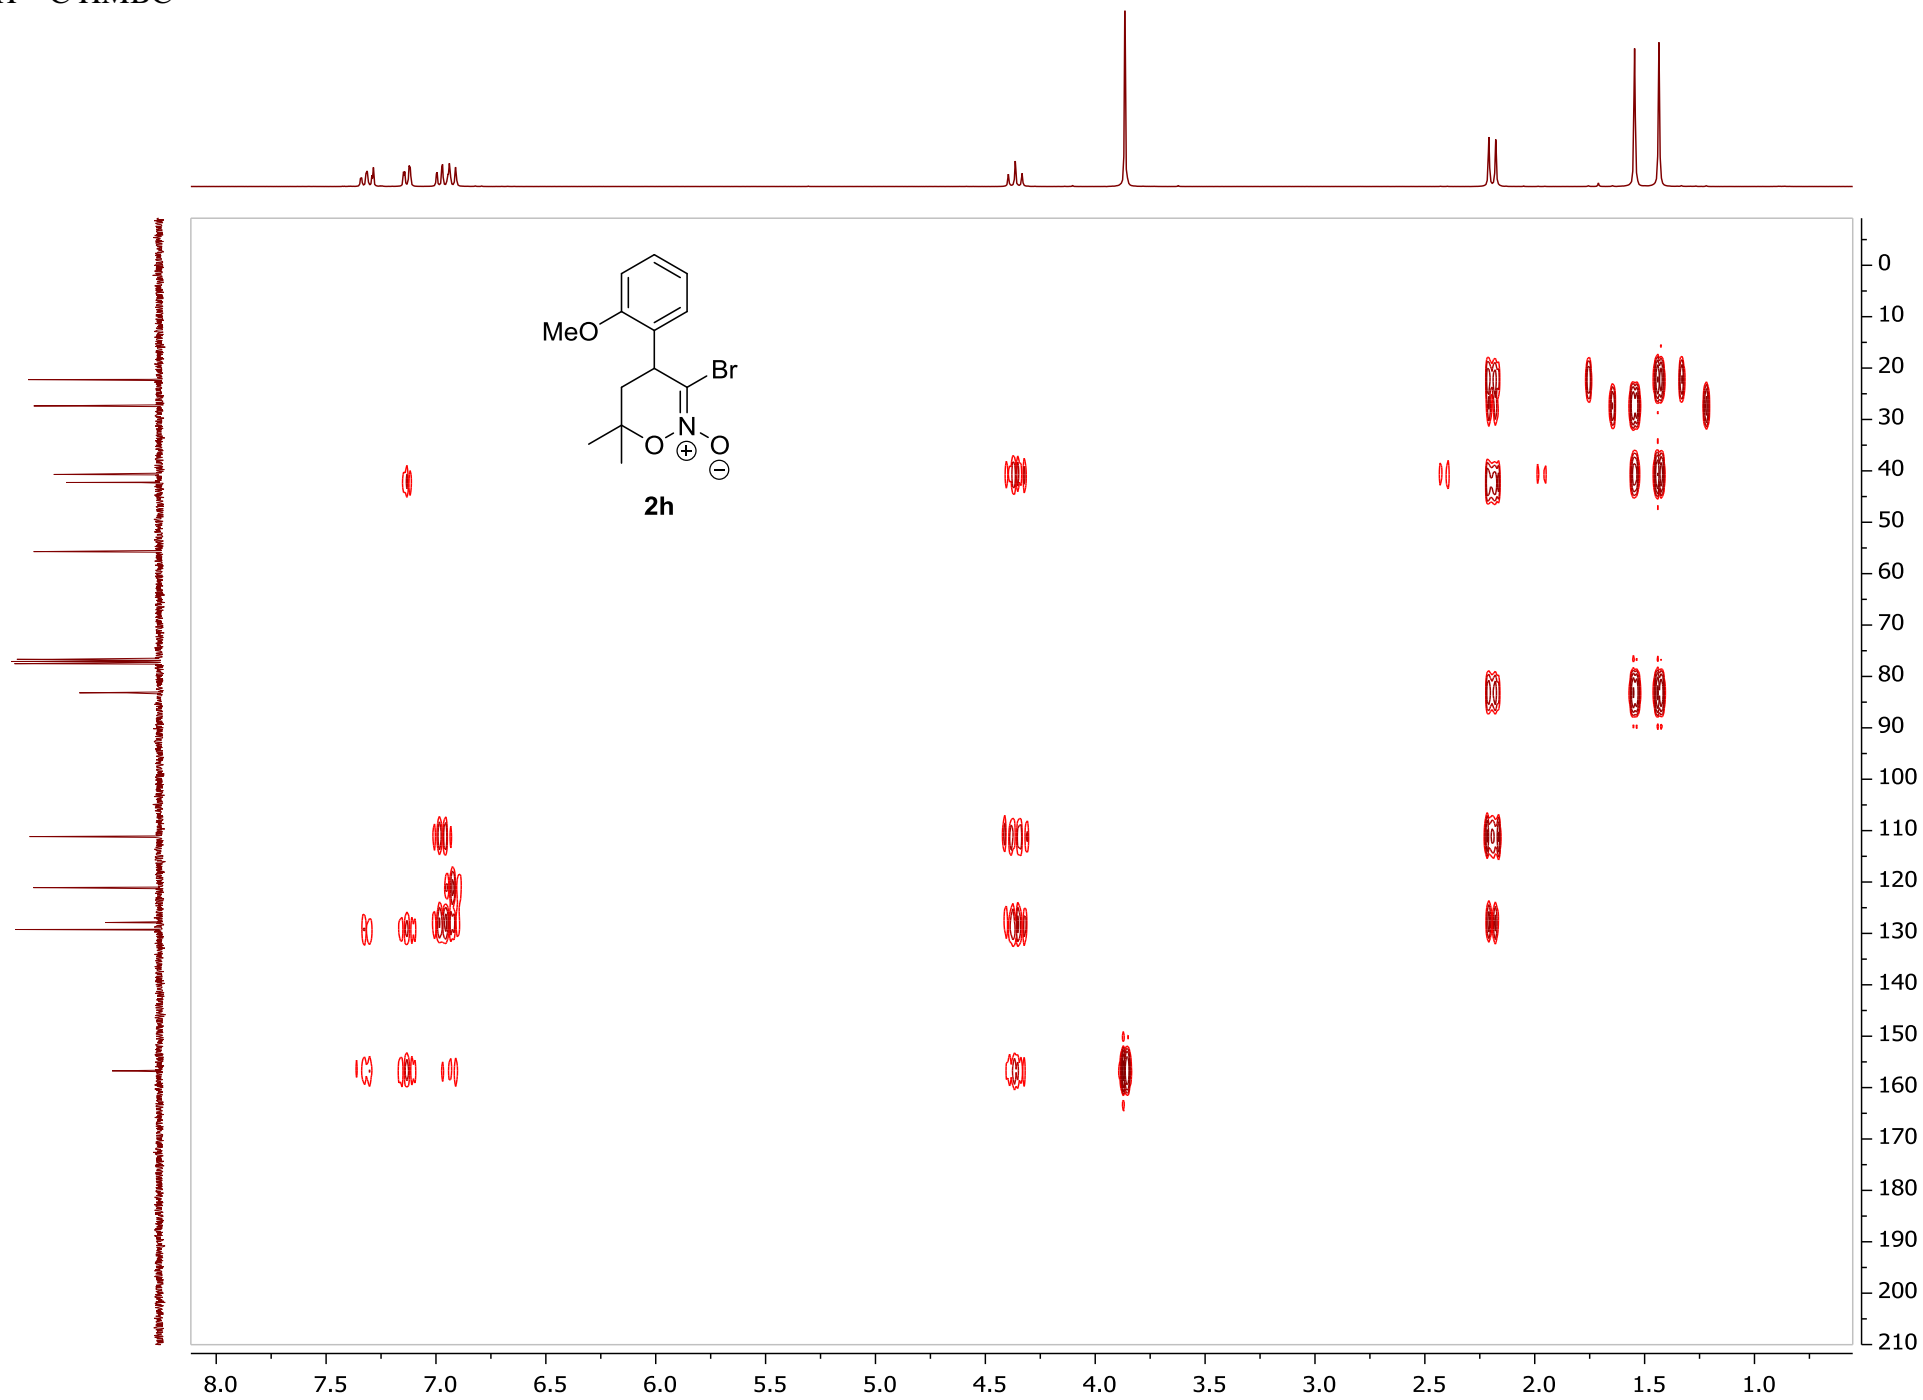

**3-Bromo-6,6-dimethyl-4-(naphthalen-1-yl)-5,6-dihydro-4H-1,2-oxazine 2-oxide 2i**

$^1\text{H}$  NMR (300 MHz,  $\text{CDCl}_3$ )

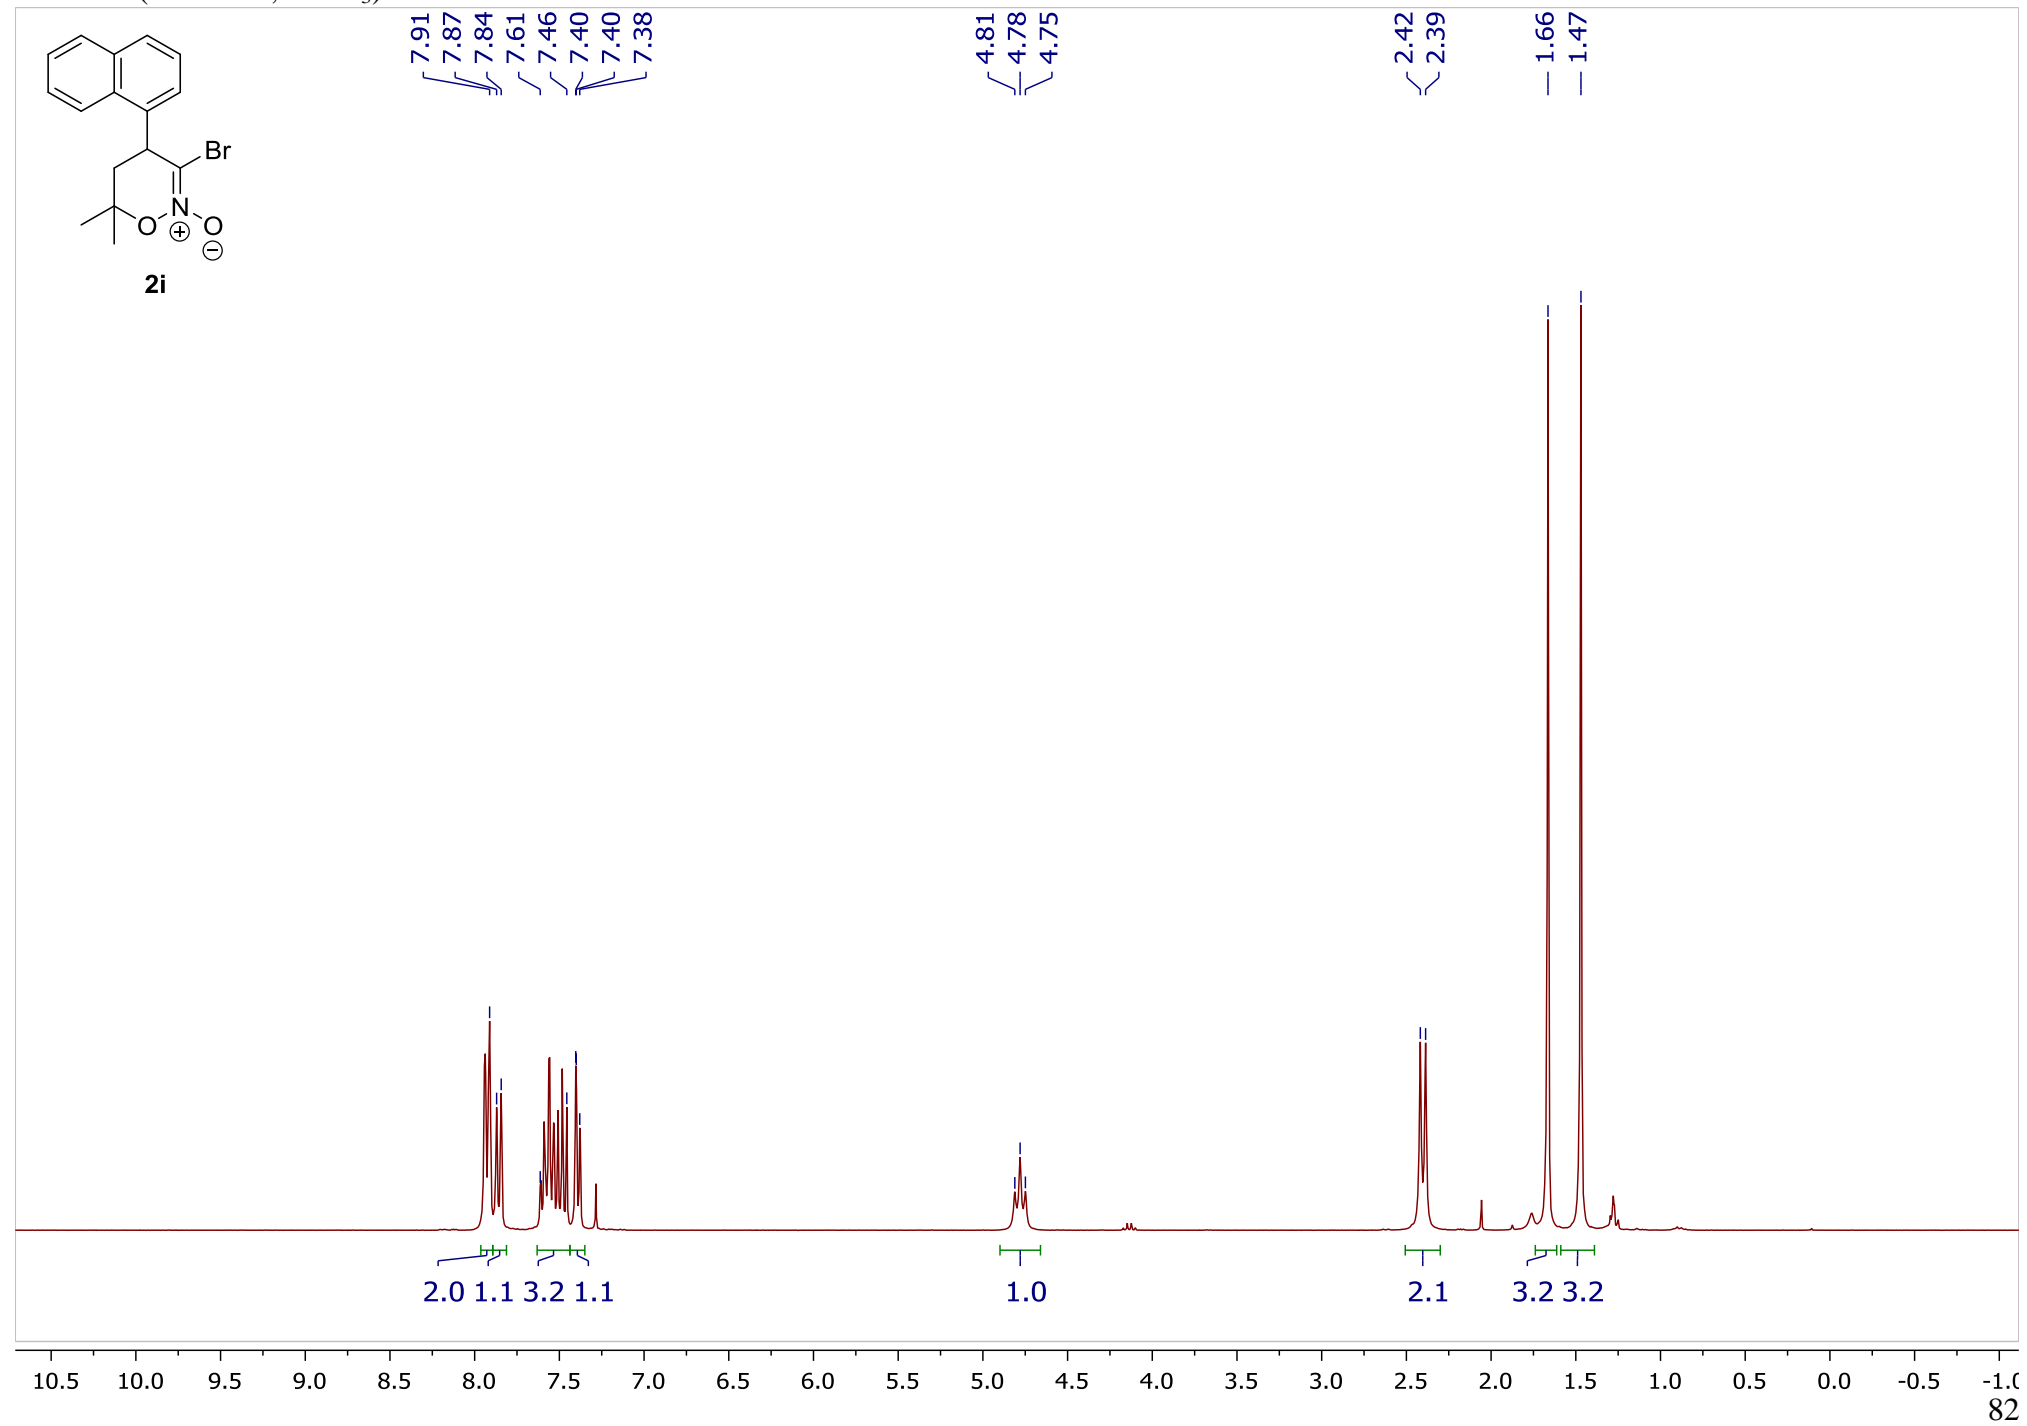

$^{13}\text{C}\{^1\text{H}\}$  NMR (75 MHz,  $\text{CDCl}_3$ )

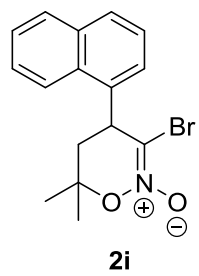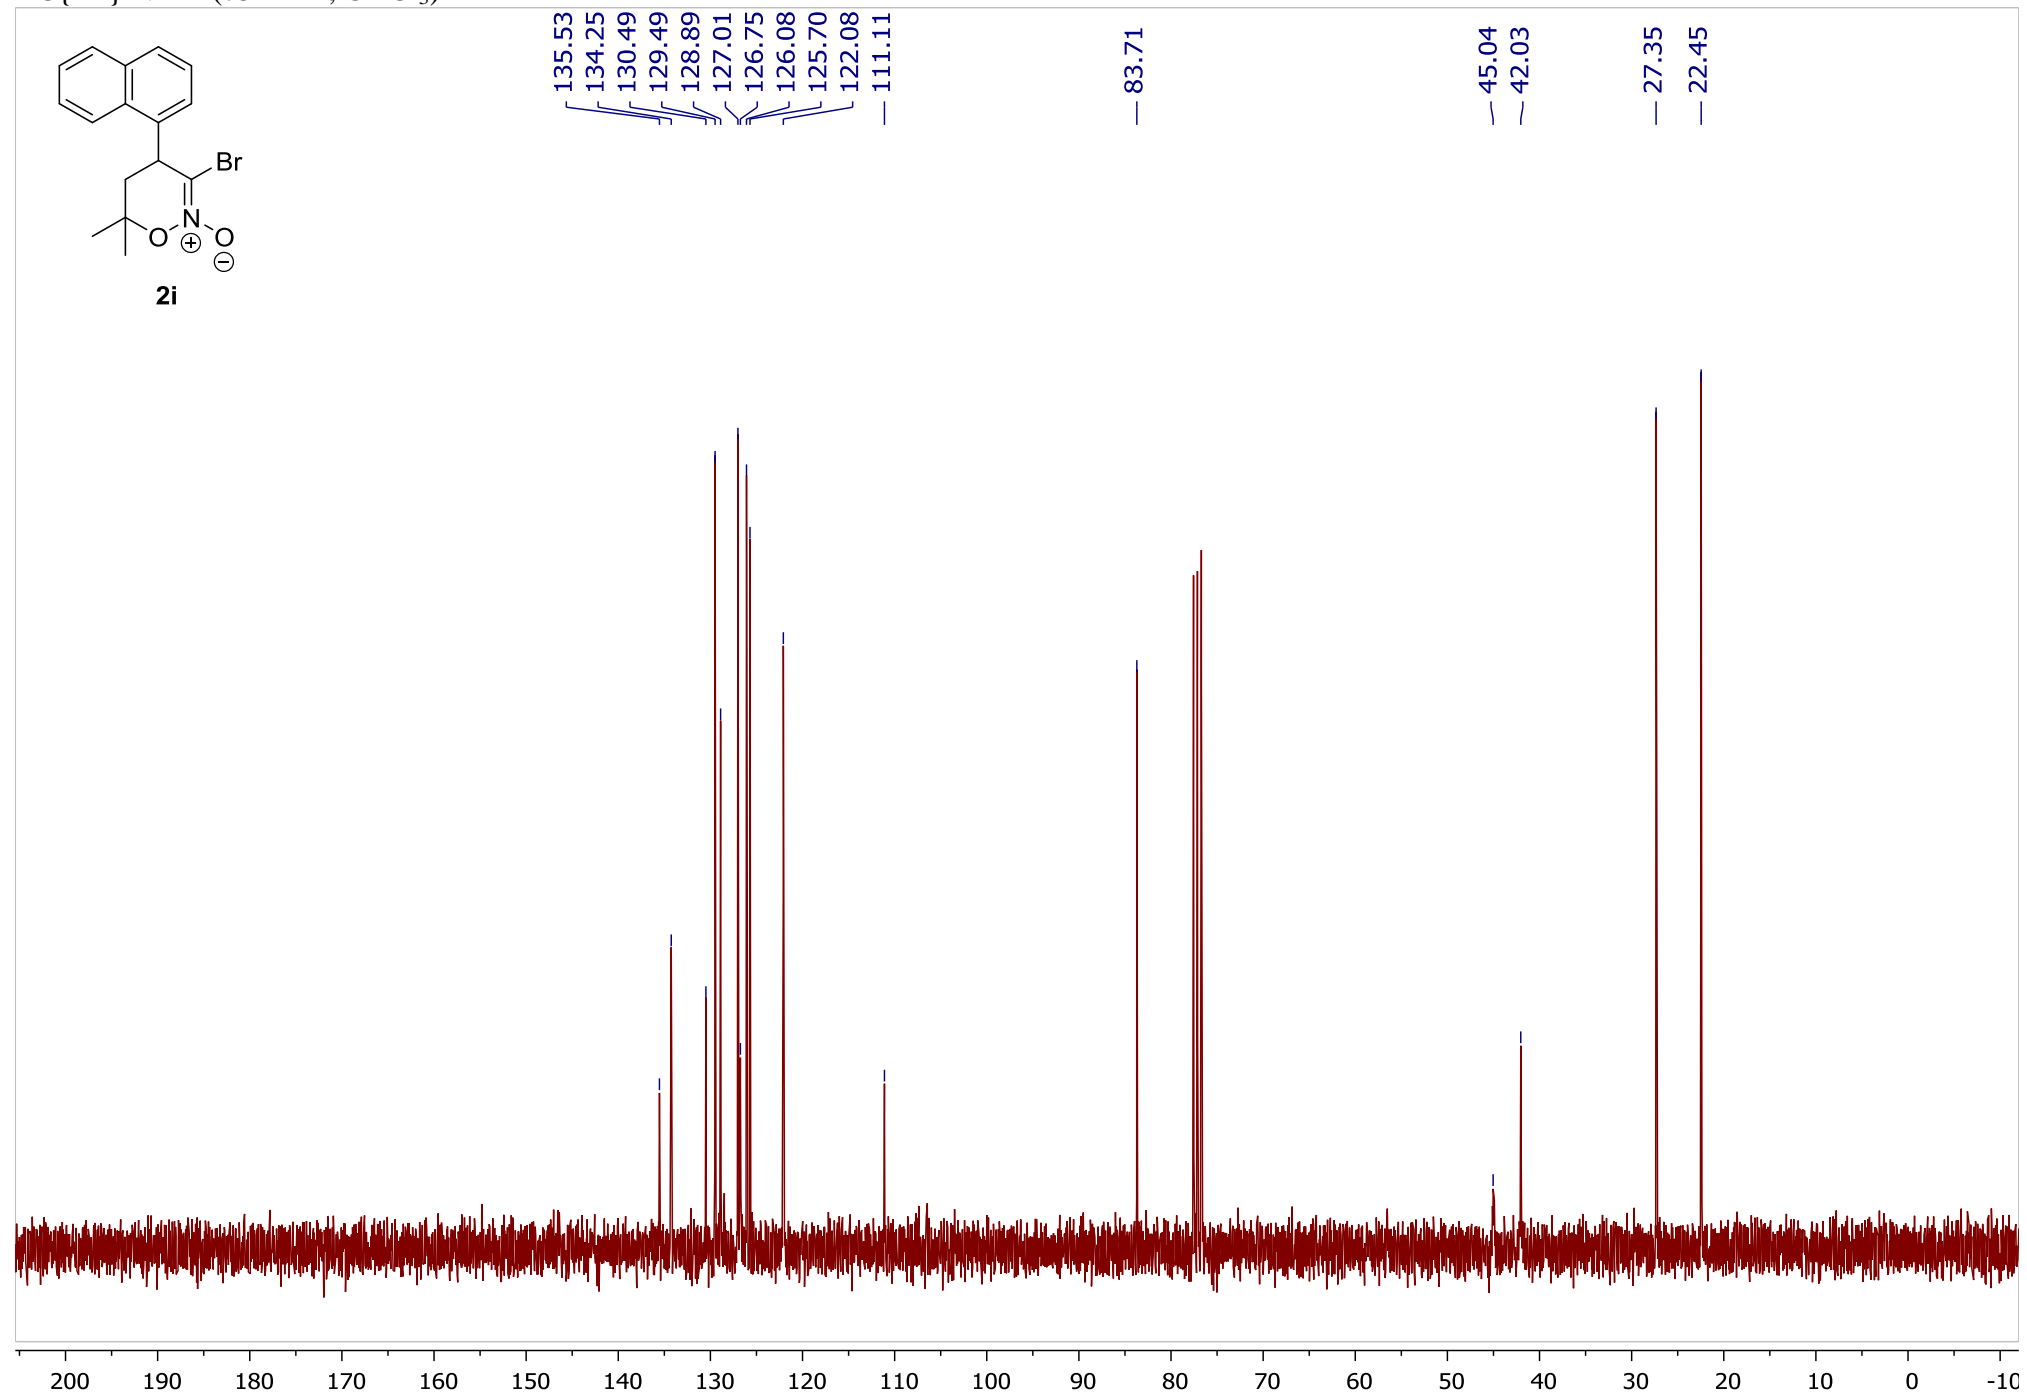

$^{13}\text{C}$  DEPT 135 (75 MHz,  $\text{CDCl}_3$ )

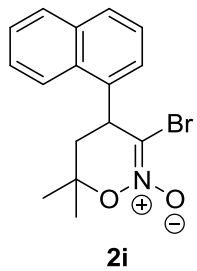

129.49  
128.89  
127.01  
126.75  
126.08  
125.70  
122.08

42.04

27.35

22.45

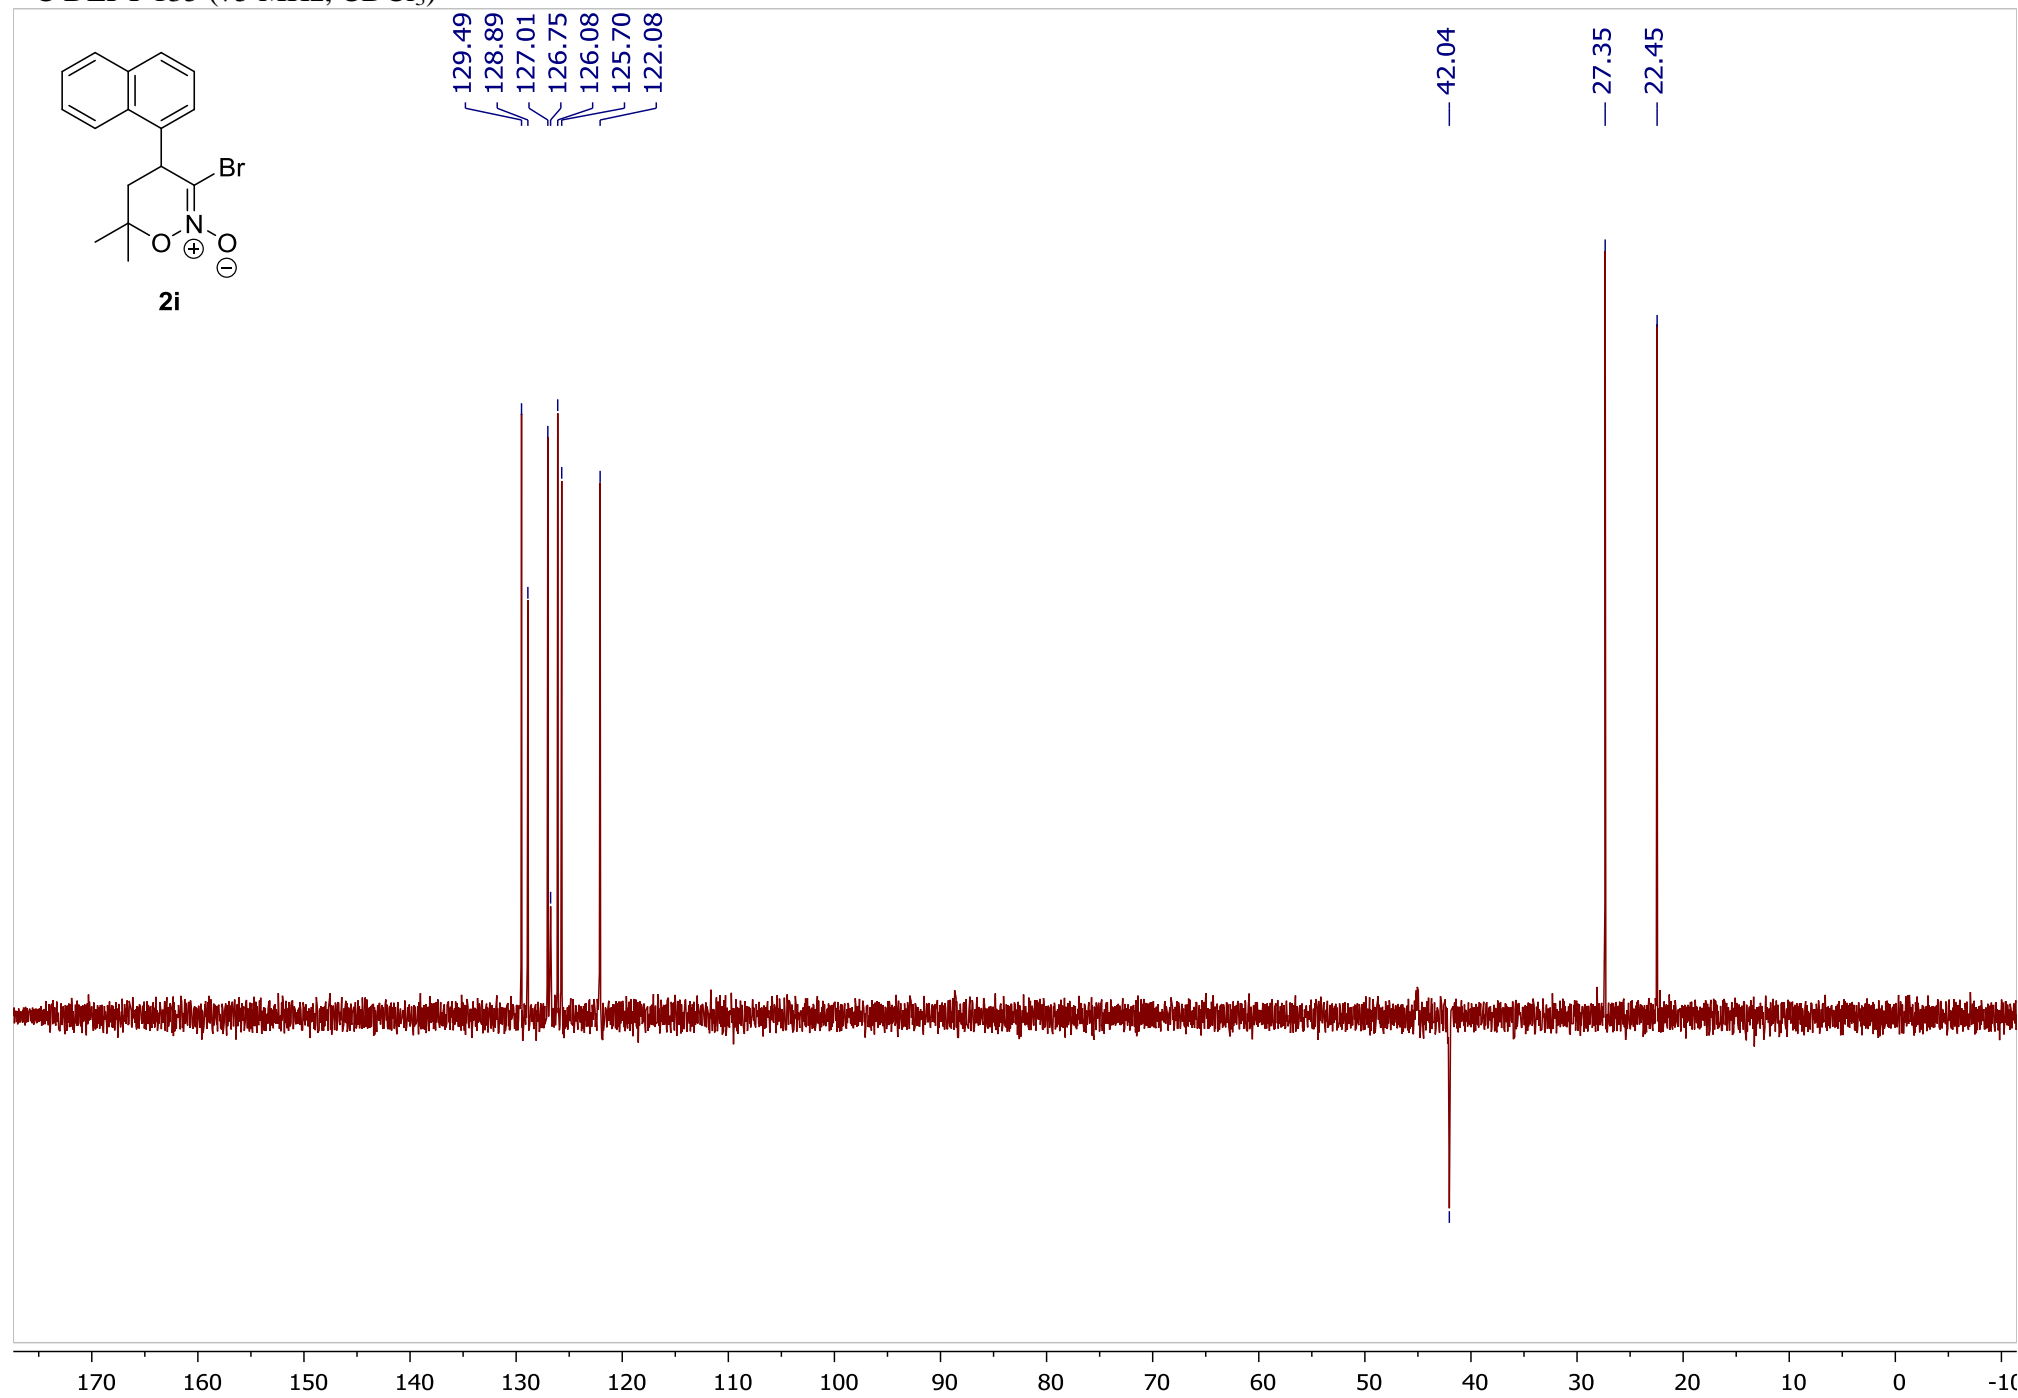

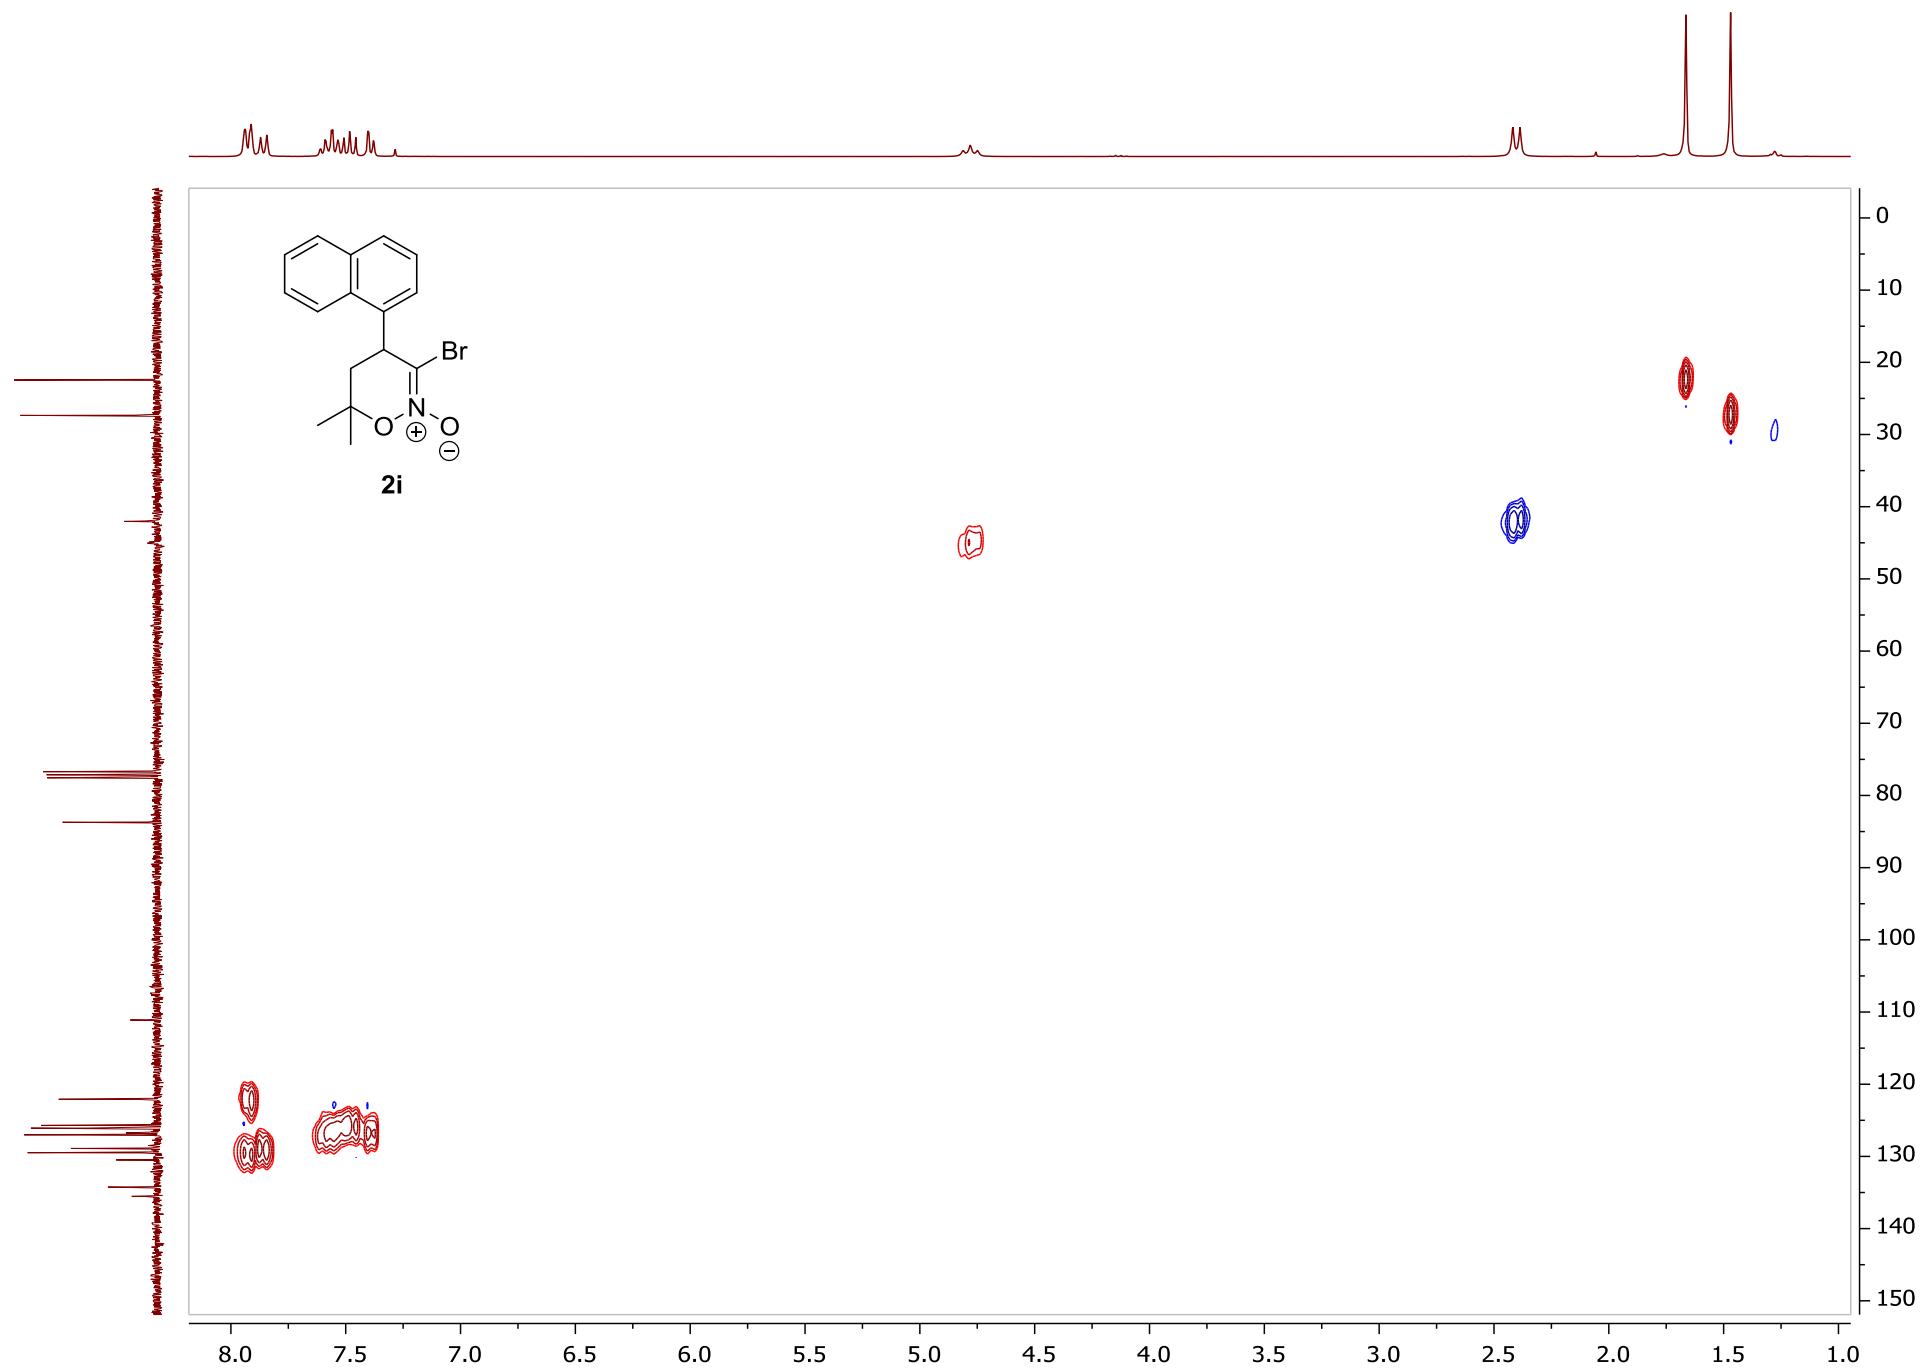

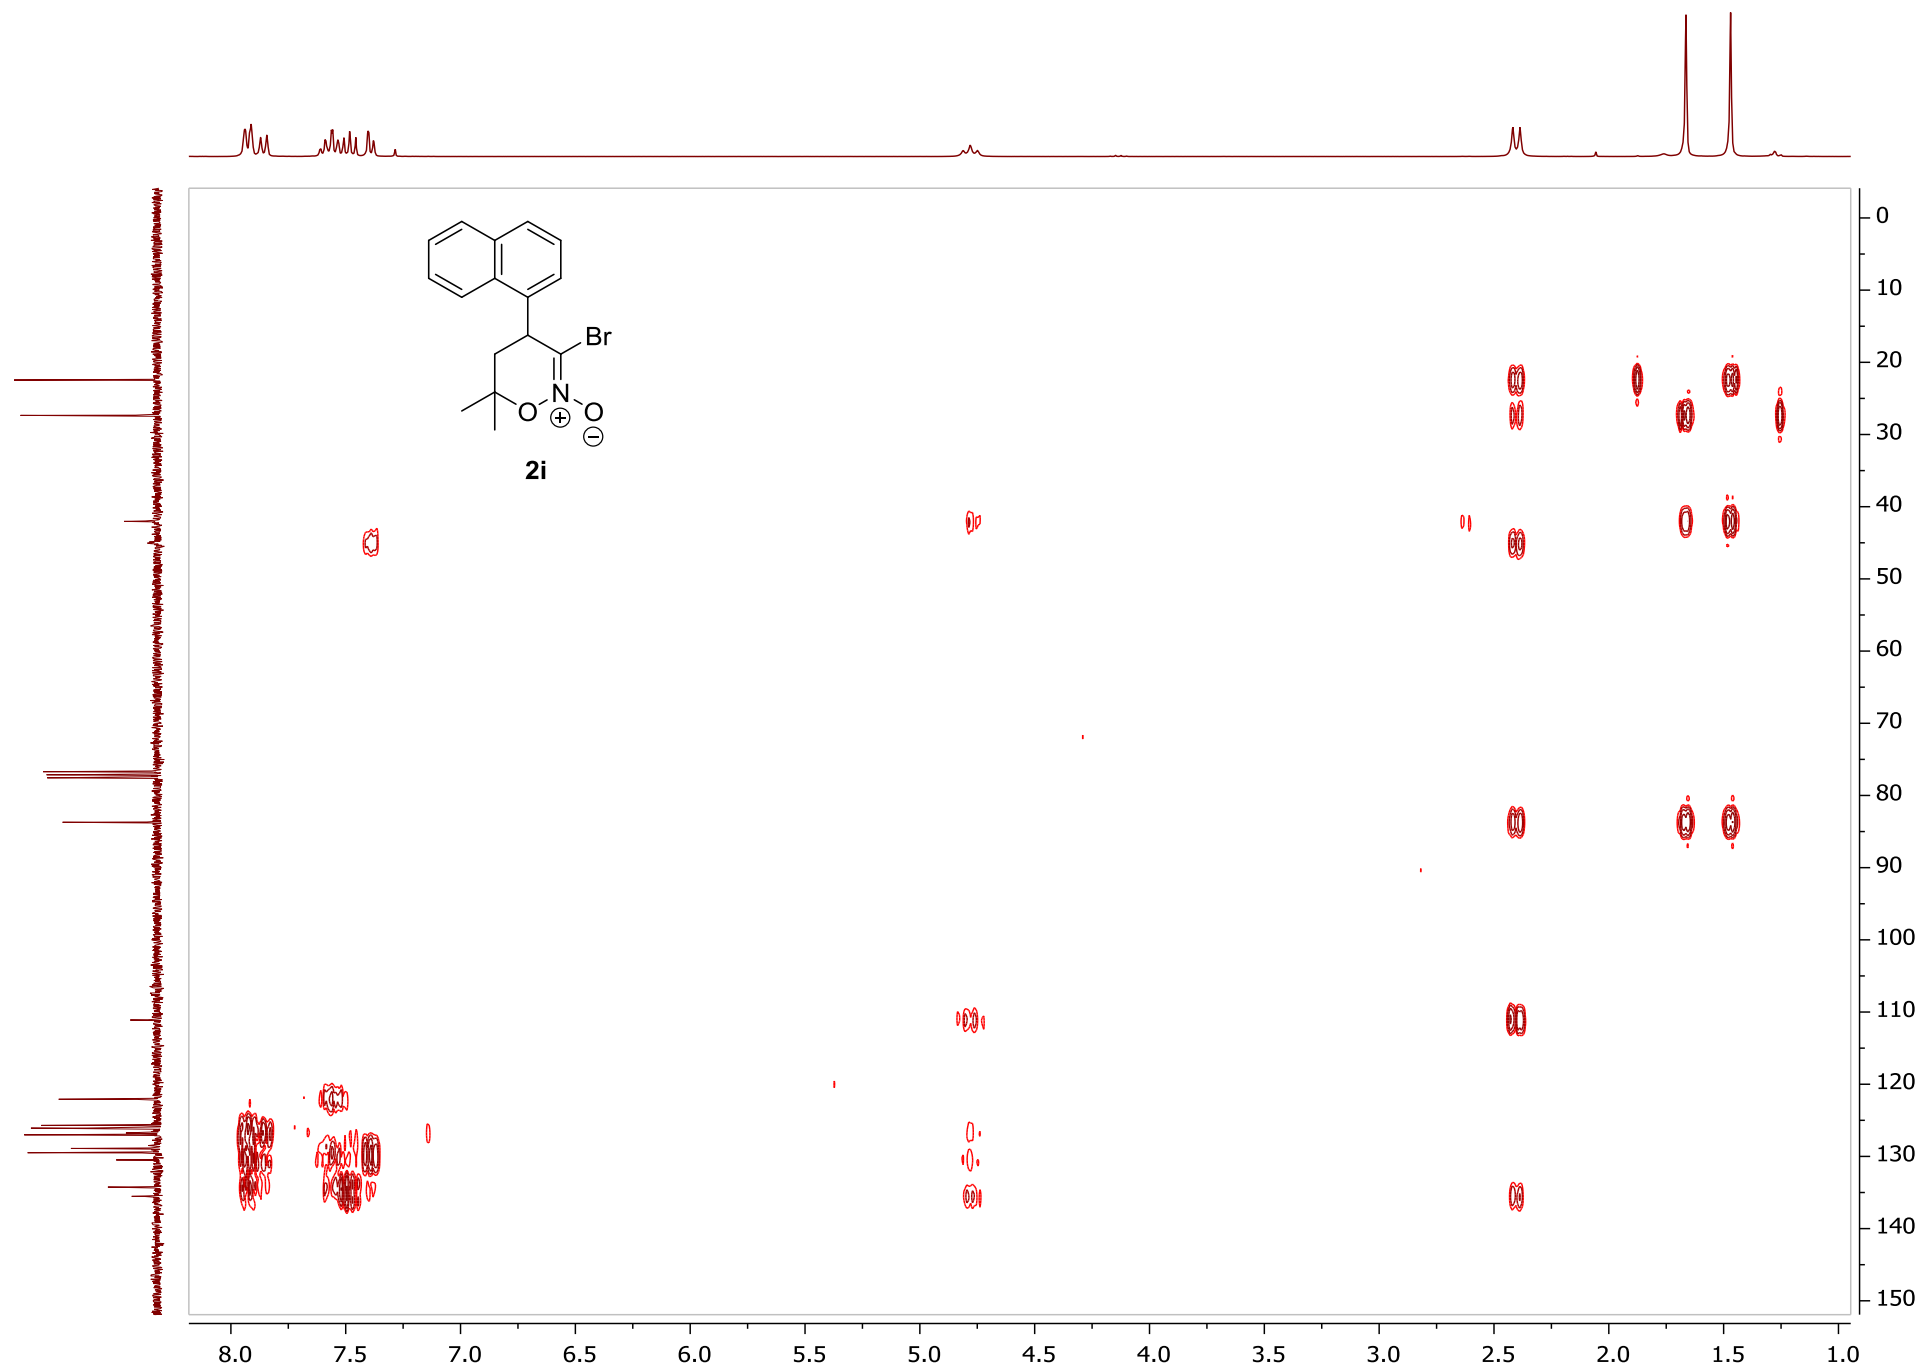

**4-(Benzo[d][1,3]dioxol-5-yl)-3-bromo-6,6-dimethyl-5,6-dihydro-4H-1,2-oxazine 2-oxide 2j**

<sup>1</sup>H NMR (300 MHz, CDCl<sub>3</sub>)

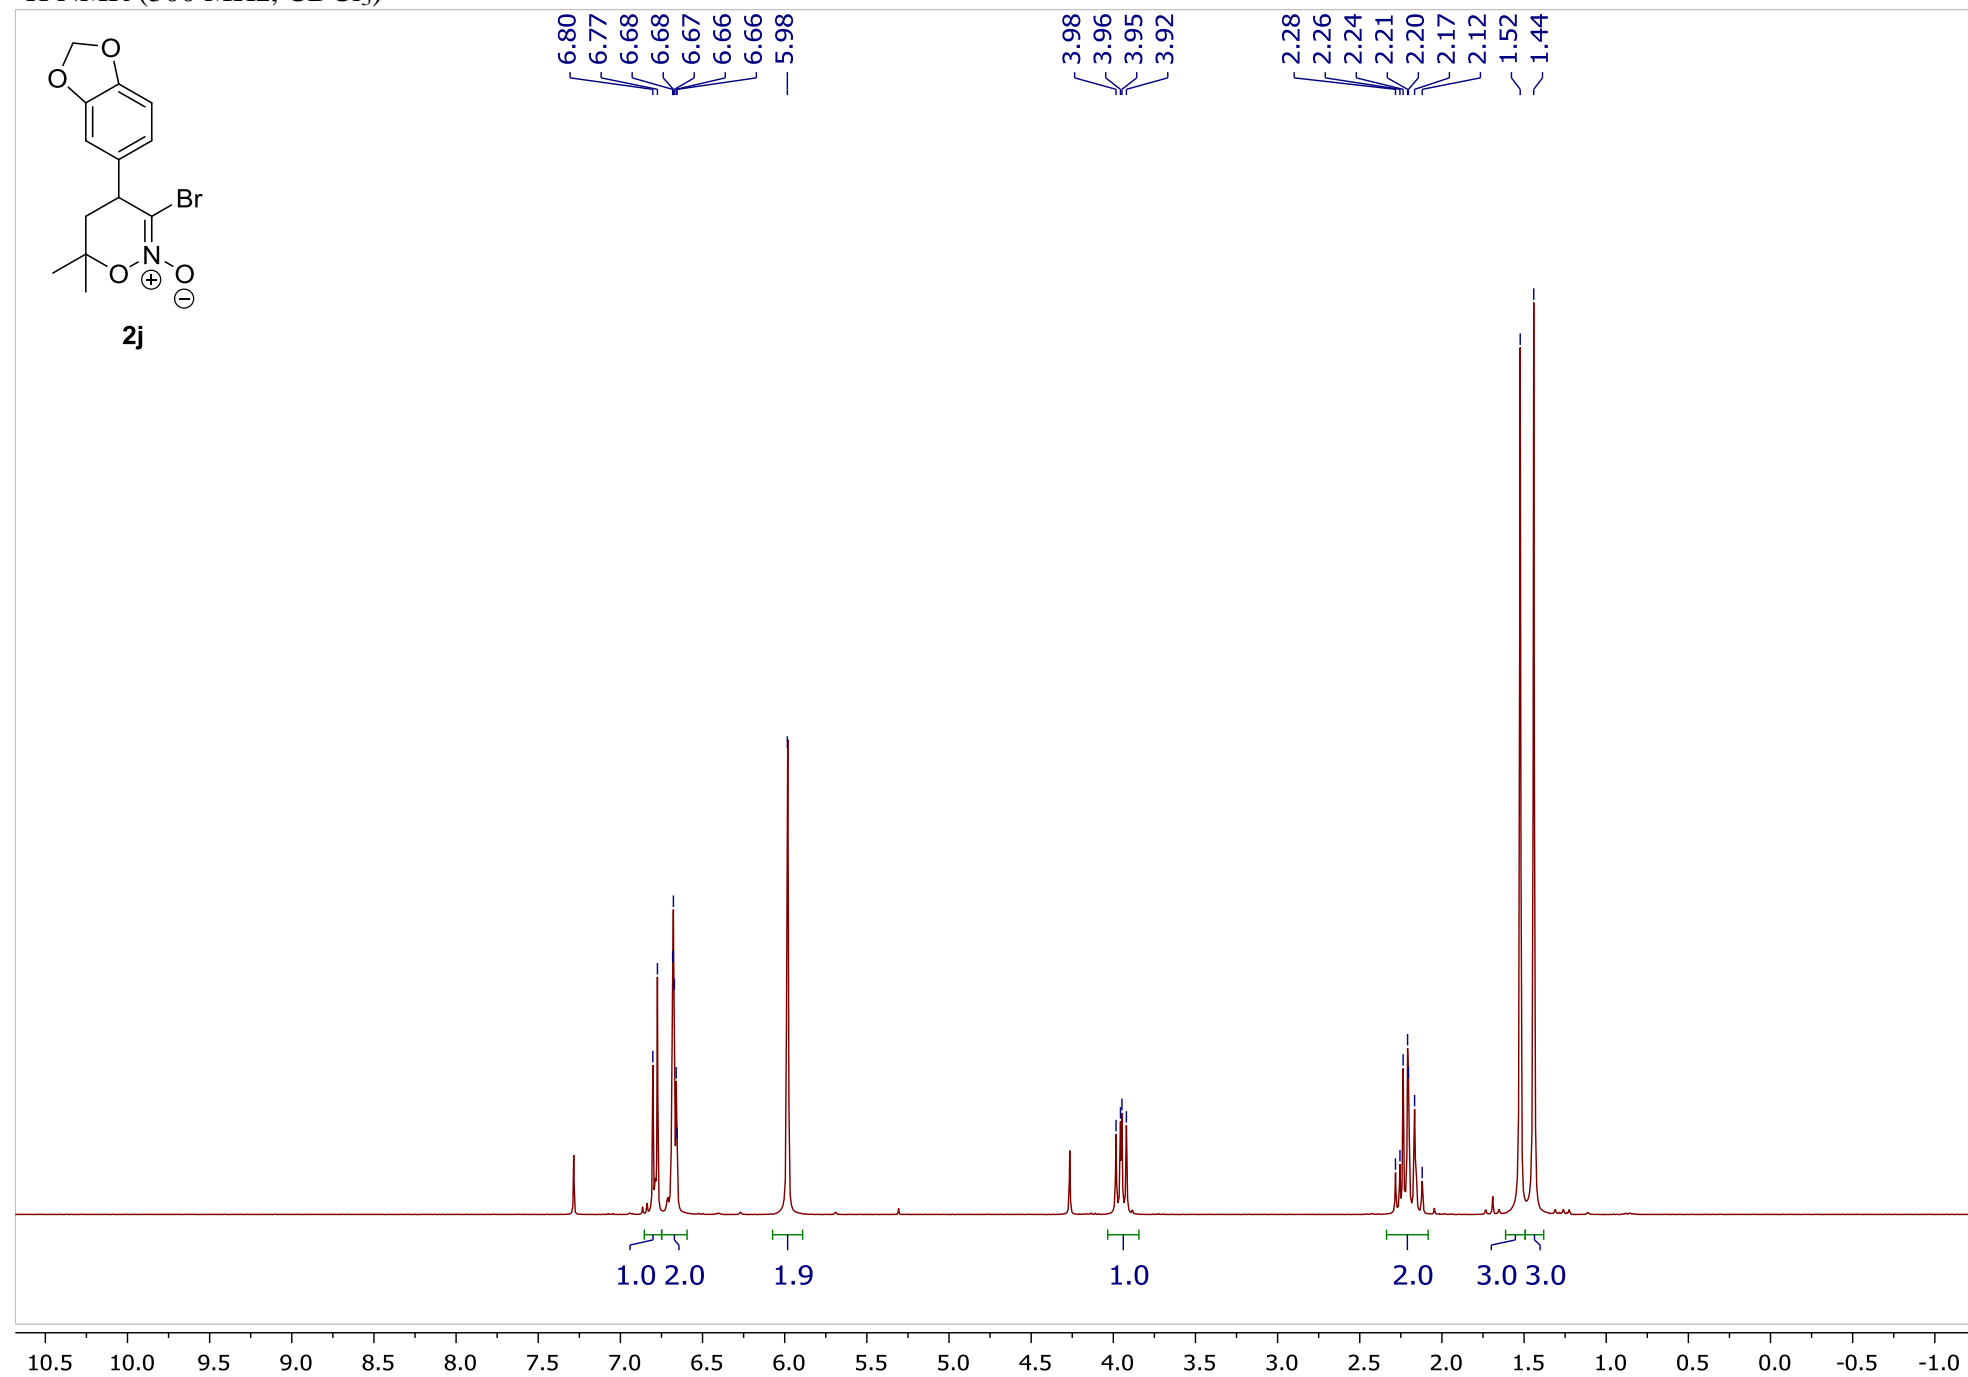

$^{13}\text{C}\{^1\text{H}\}$  NMR (75 MHz,  $\text{CDCl}_3$ )

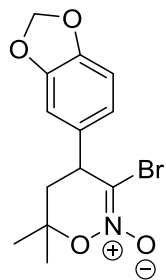

**2j**

148.29  
147.40  
133.59  
121.38  
110.68  
108.63  
107.95  
101.38  
83.27  
47.17  
43.41  
27.33  
22.18

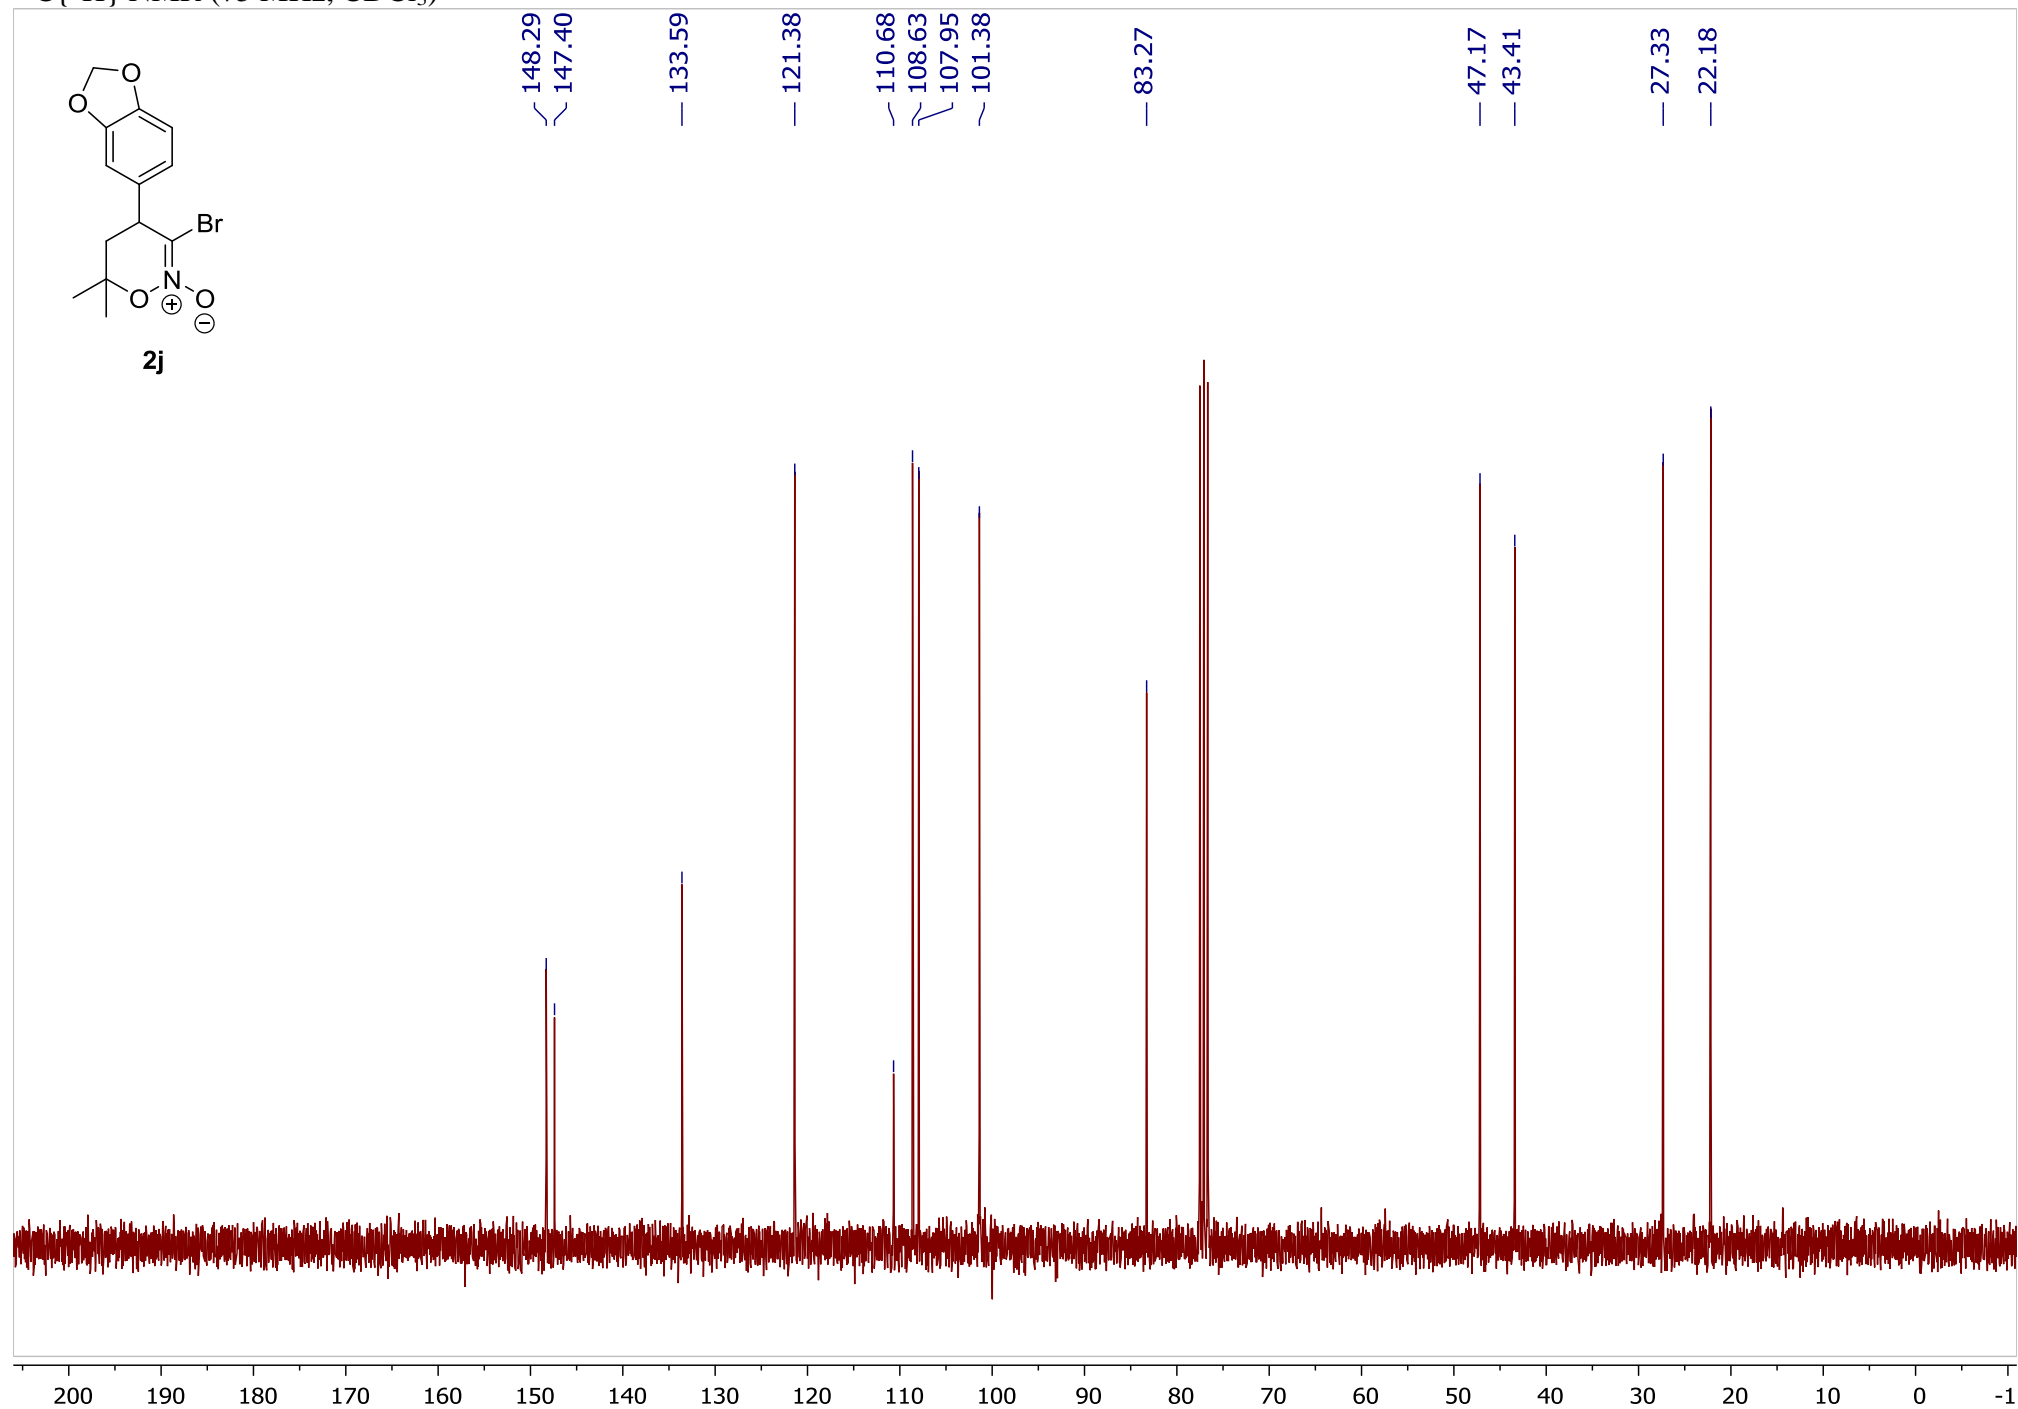



<sup>13</sup>C DEPT 135 (75 MHz, CDCl<sub>3</sub>)

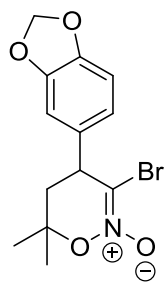

**2j**

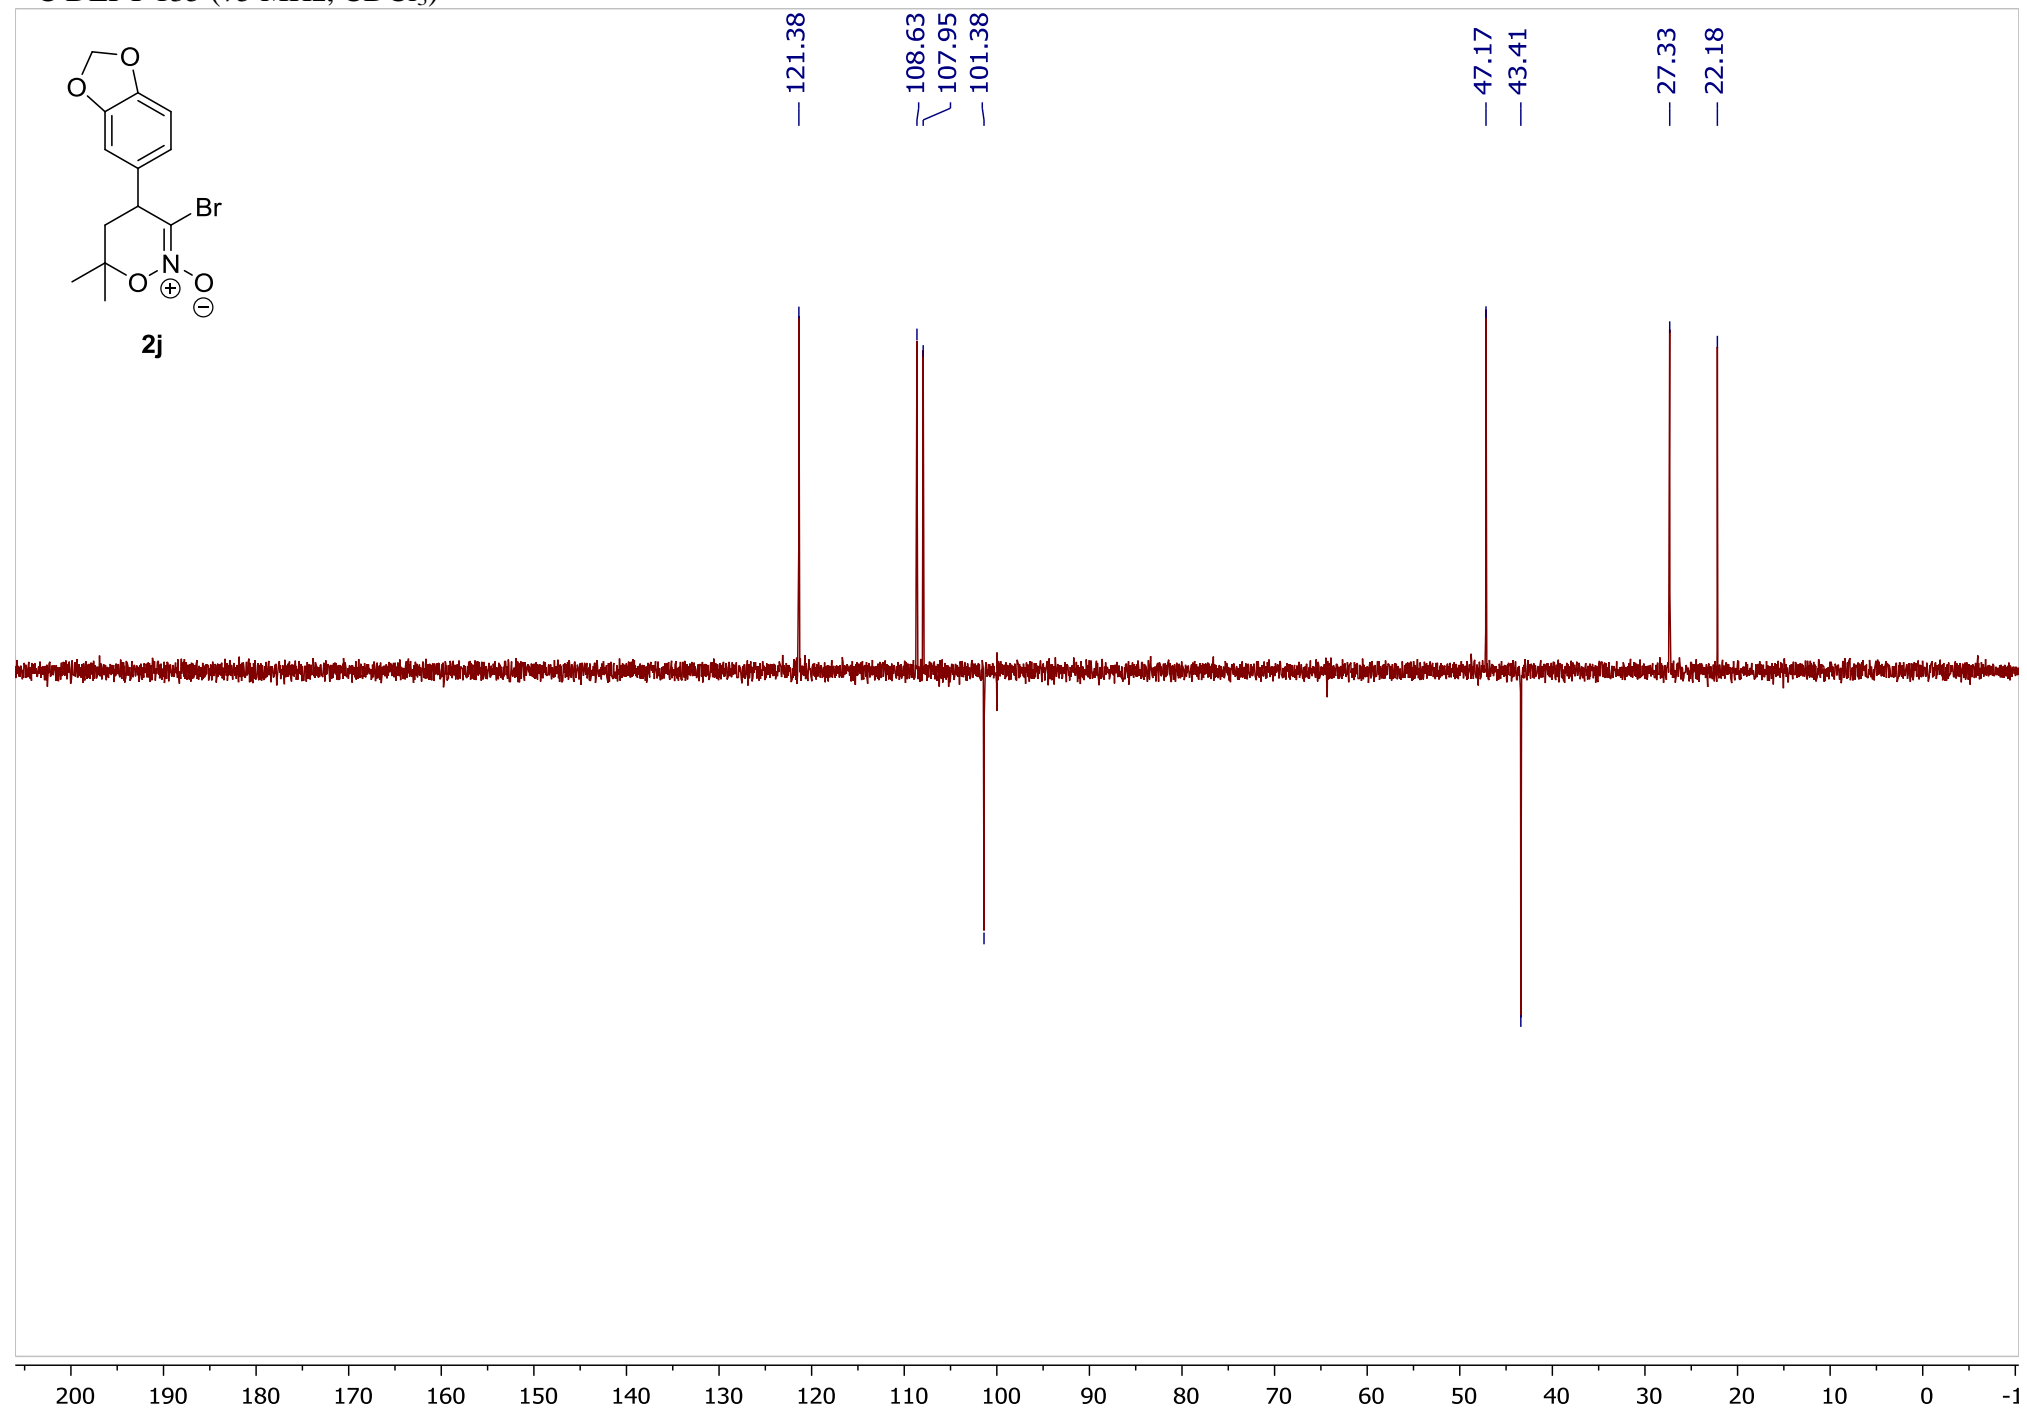

**3-Bromo-4-(2-bromo-4,5-dimethoxyphenyl)-6,6-dimethyl-5,6-dihydro-4H-1,2-oxazine 2-oxide 2k**

<sup>1</sup>H NMR (300 MHz, CDCl<sub>3</sub>)

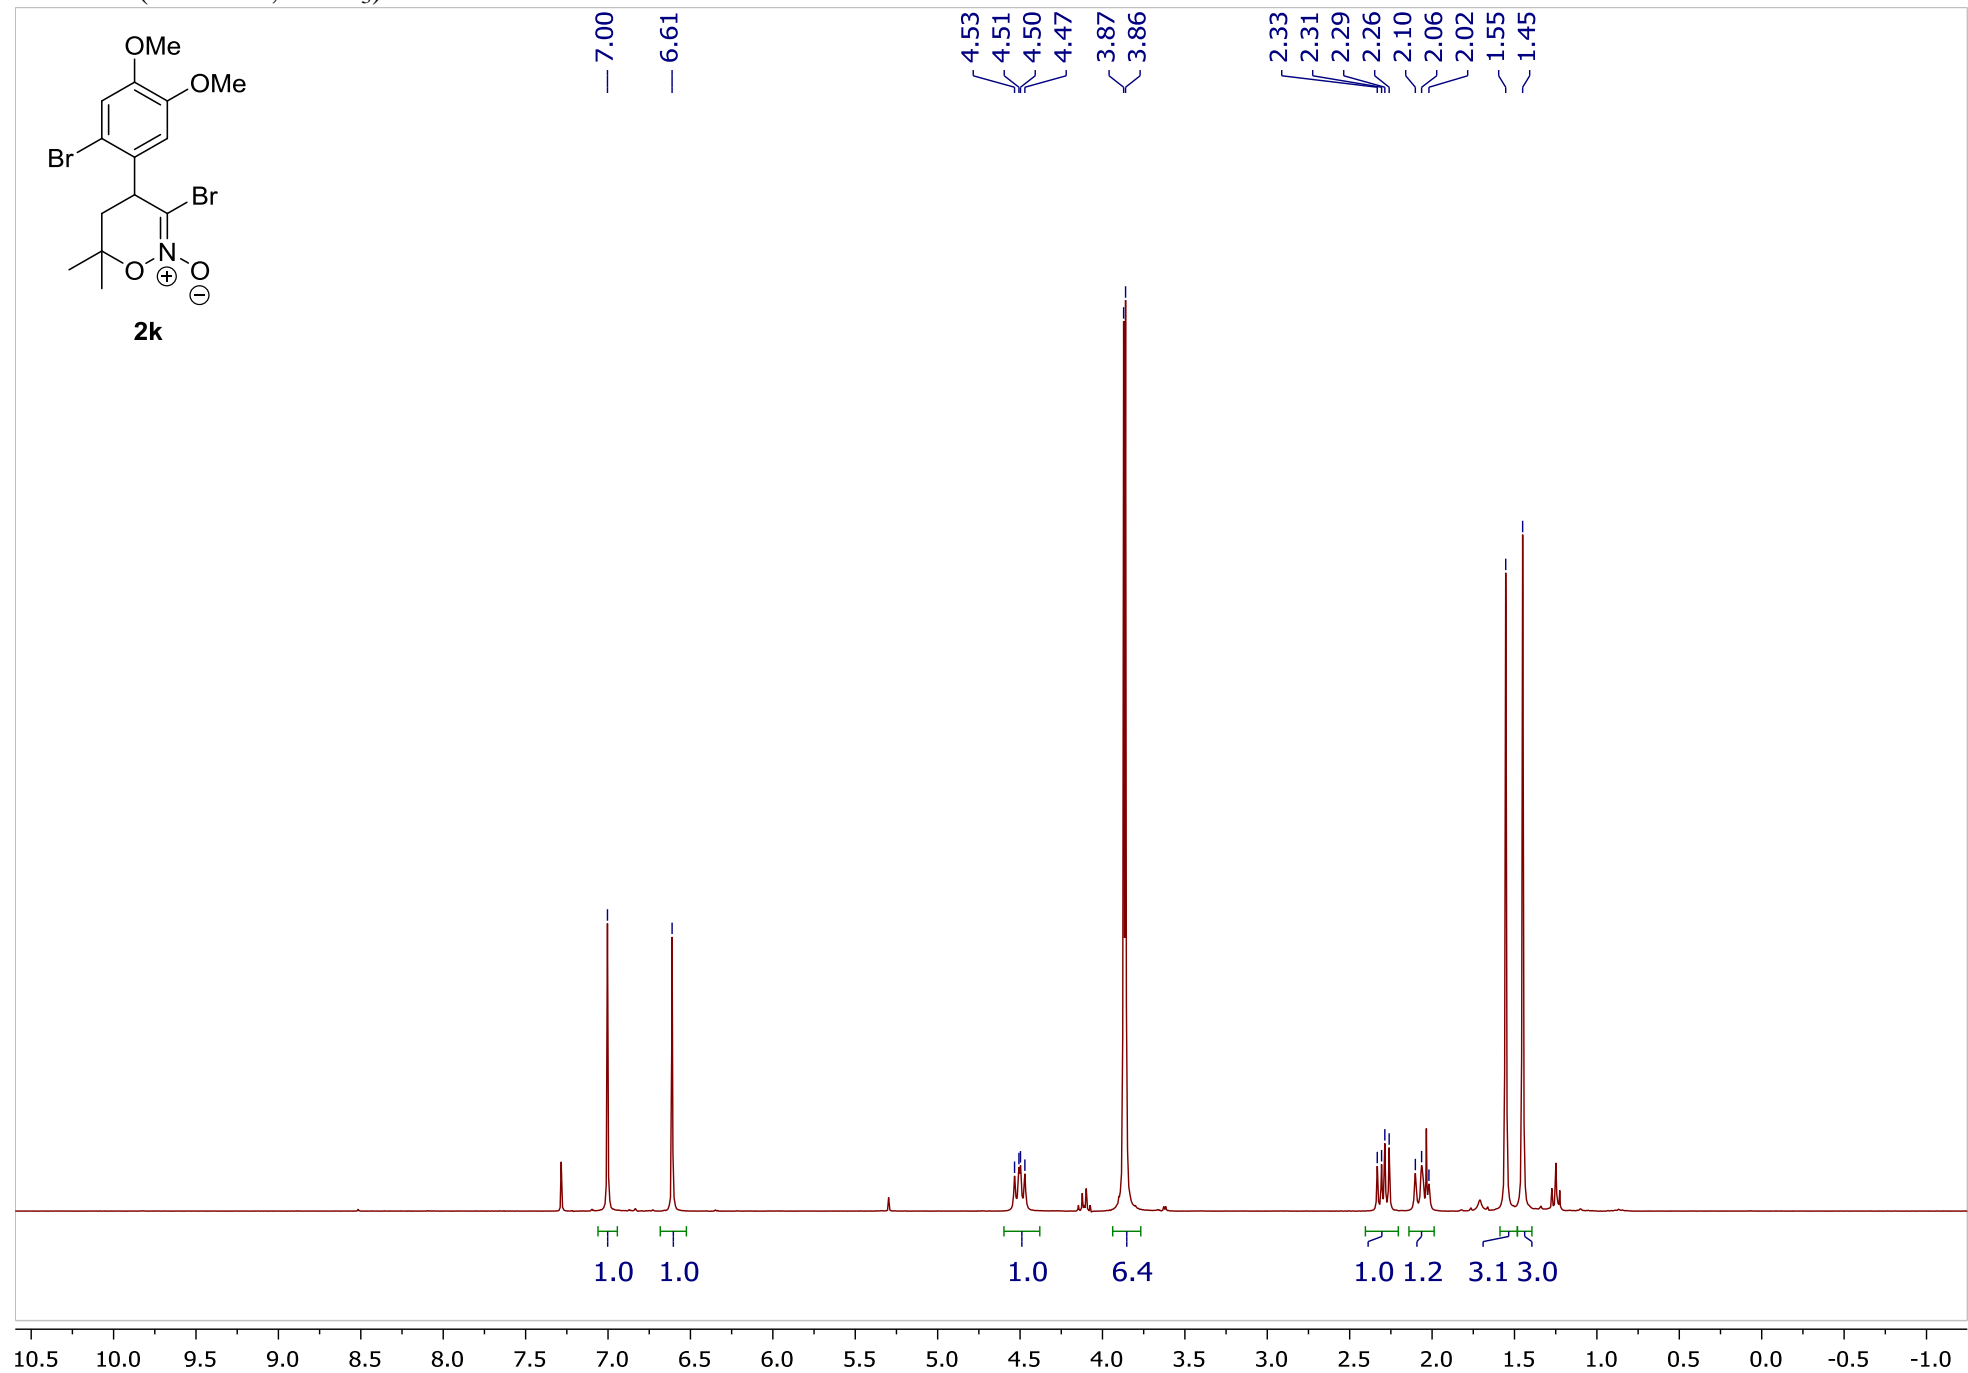

$^{13}\text{C}\{^1\text{H}\}$  NMR (75 MHz,  $\text{CDCl}_3$ )

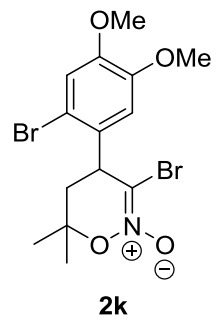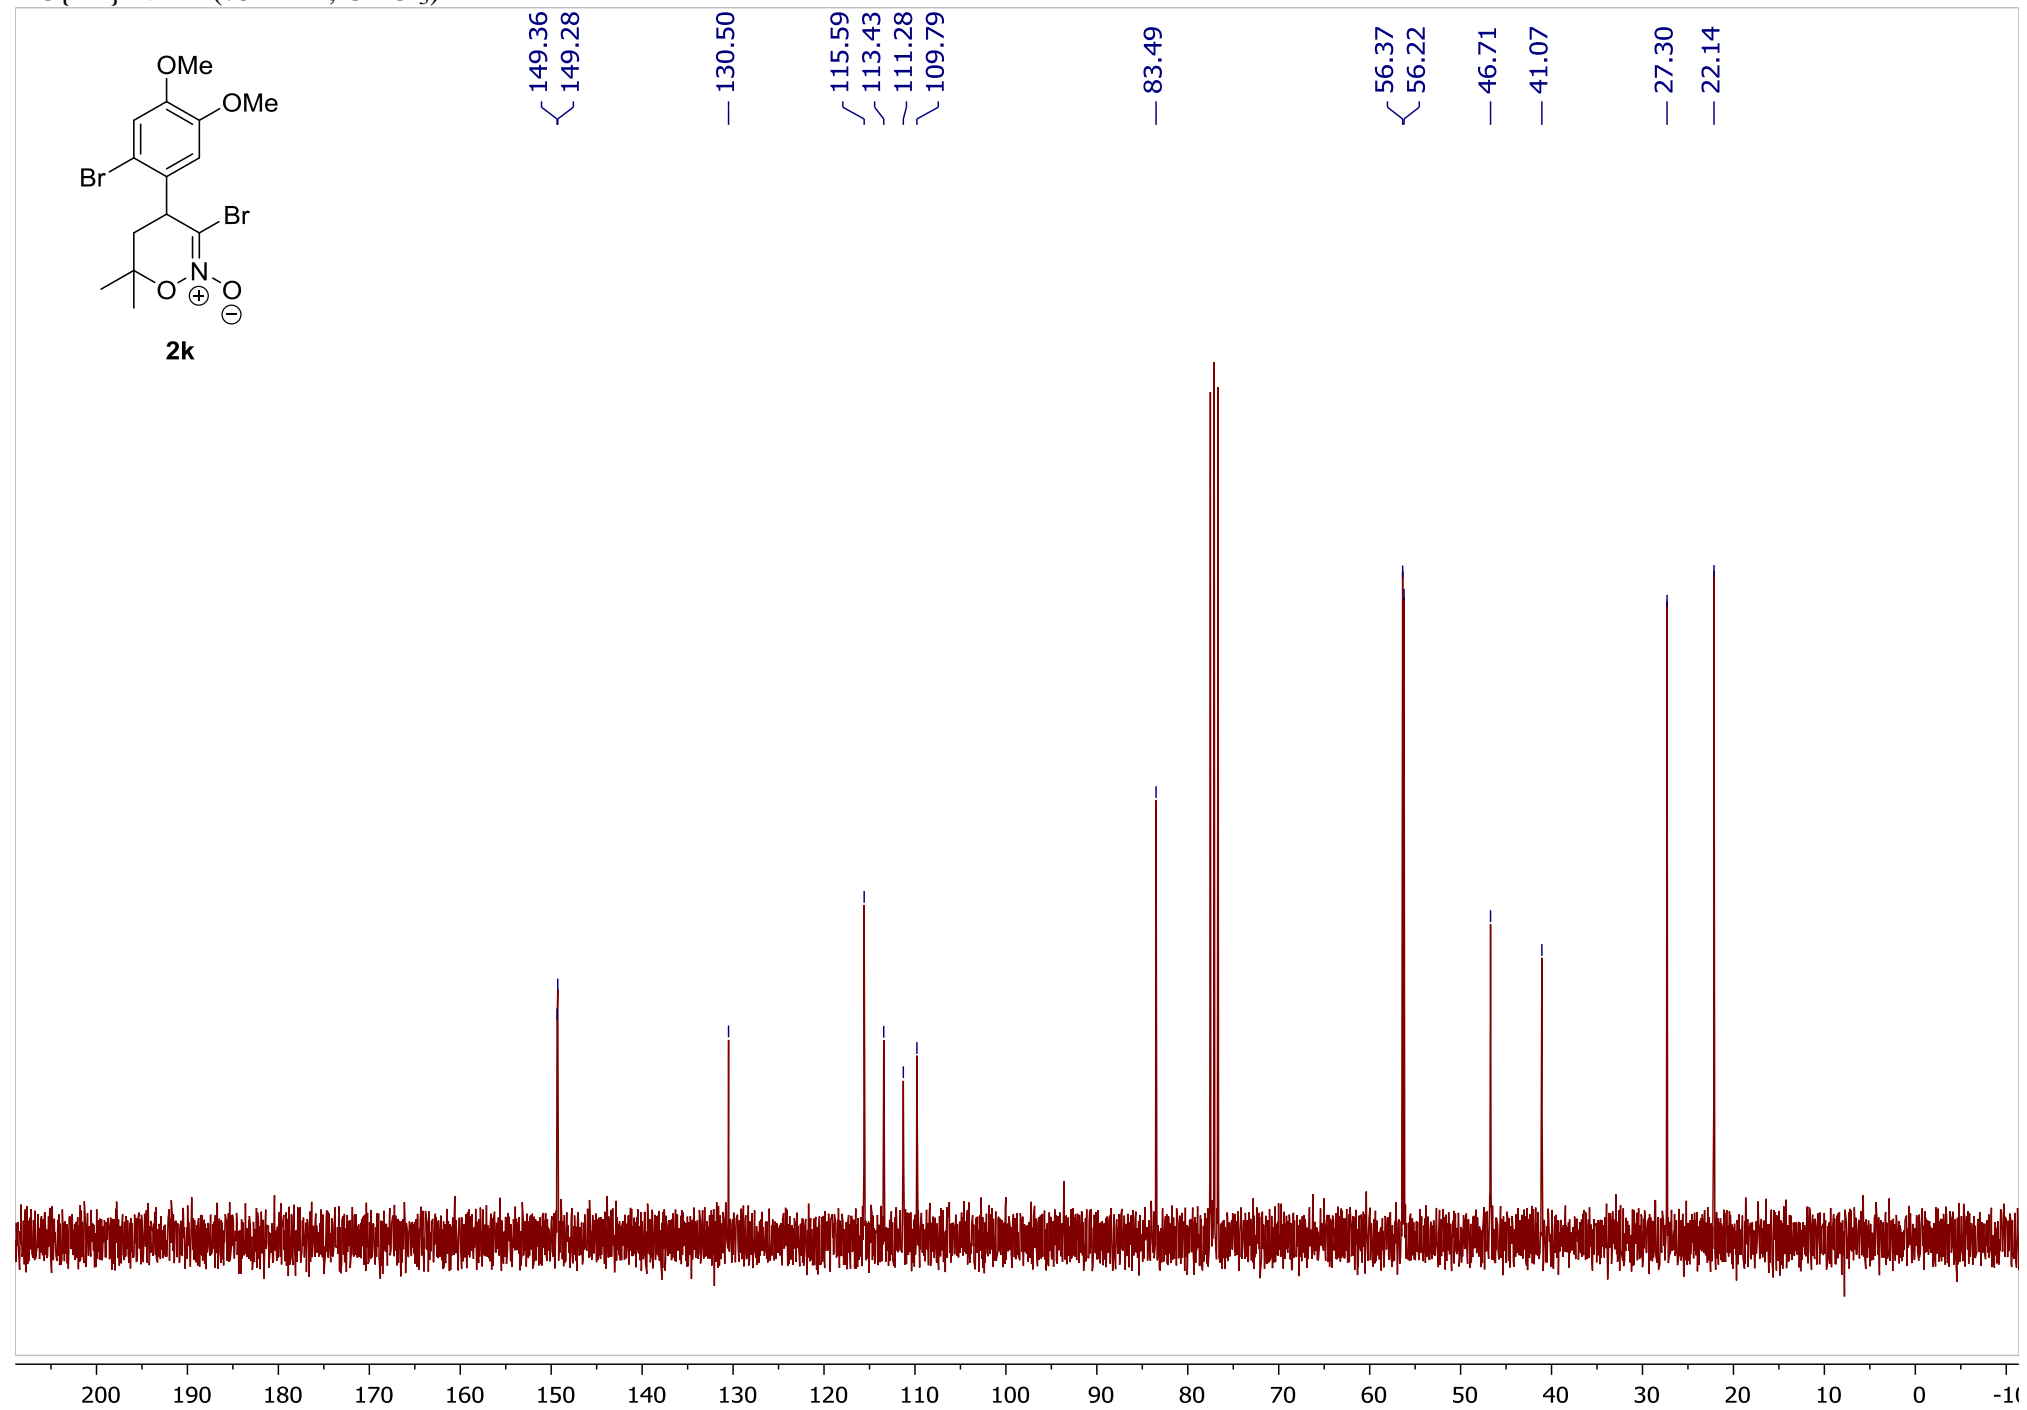

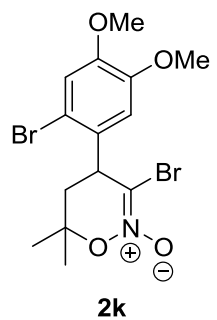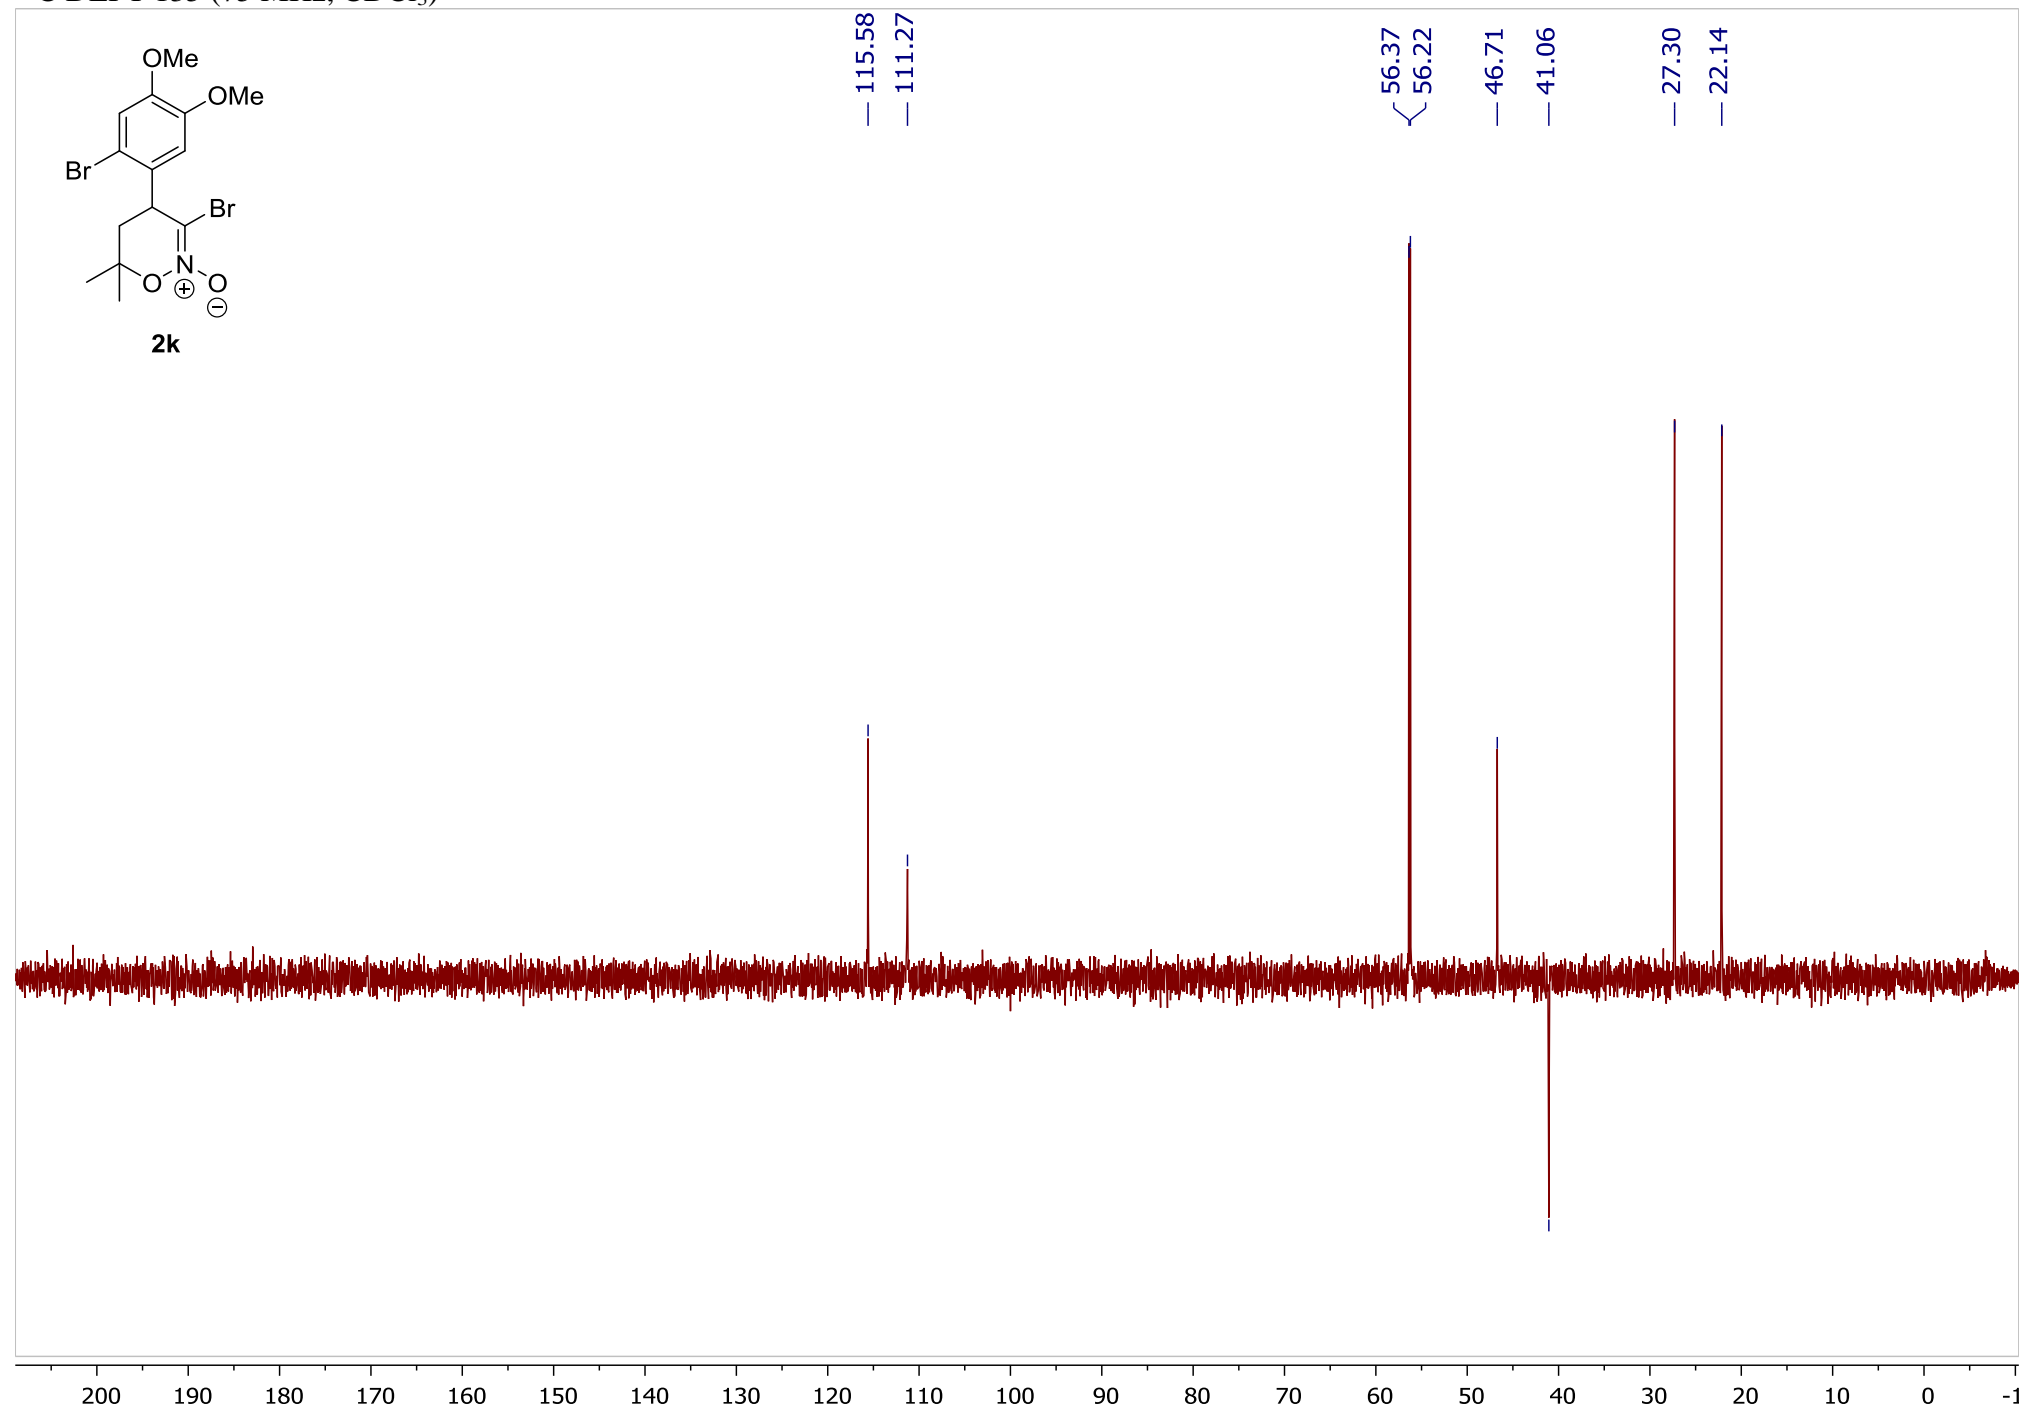

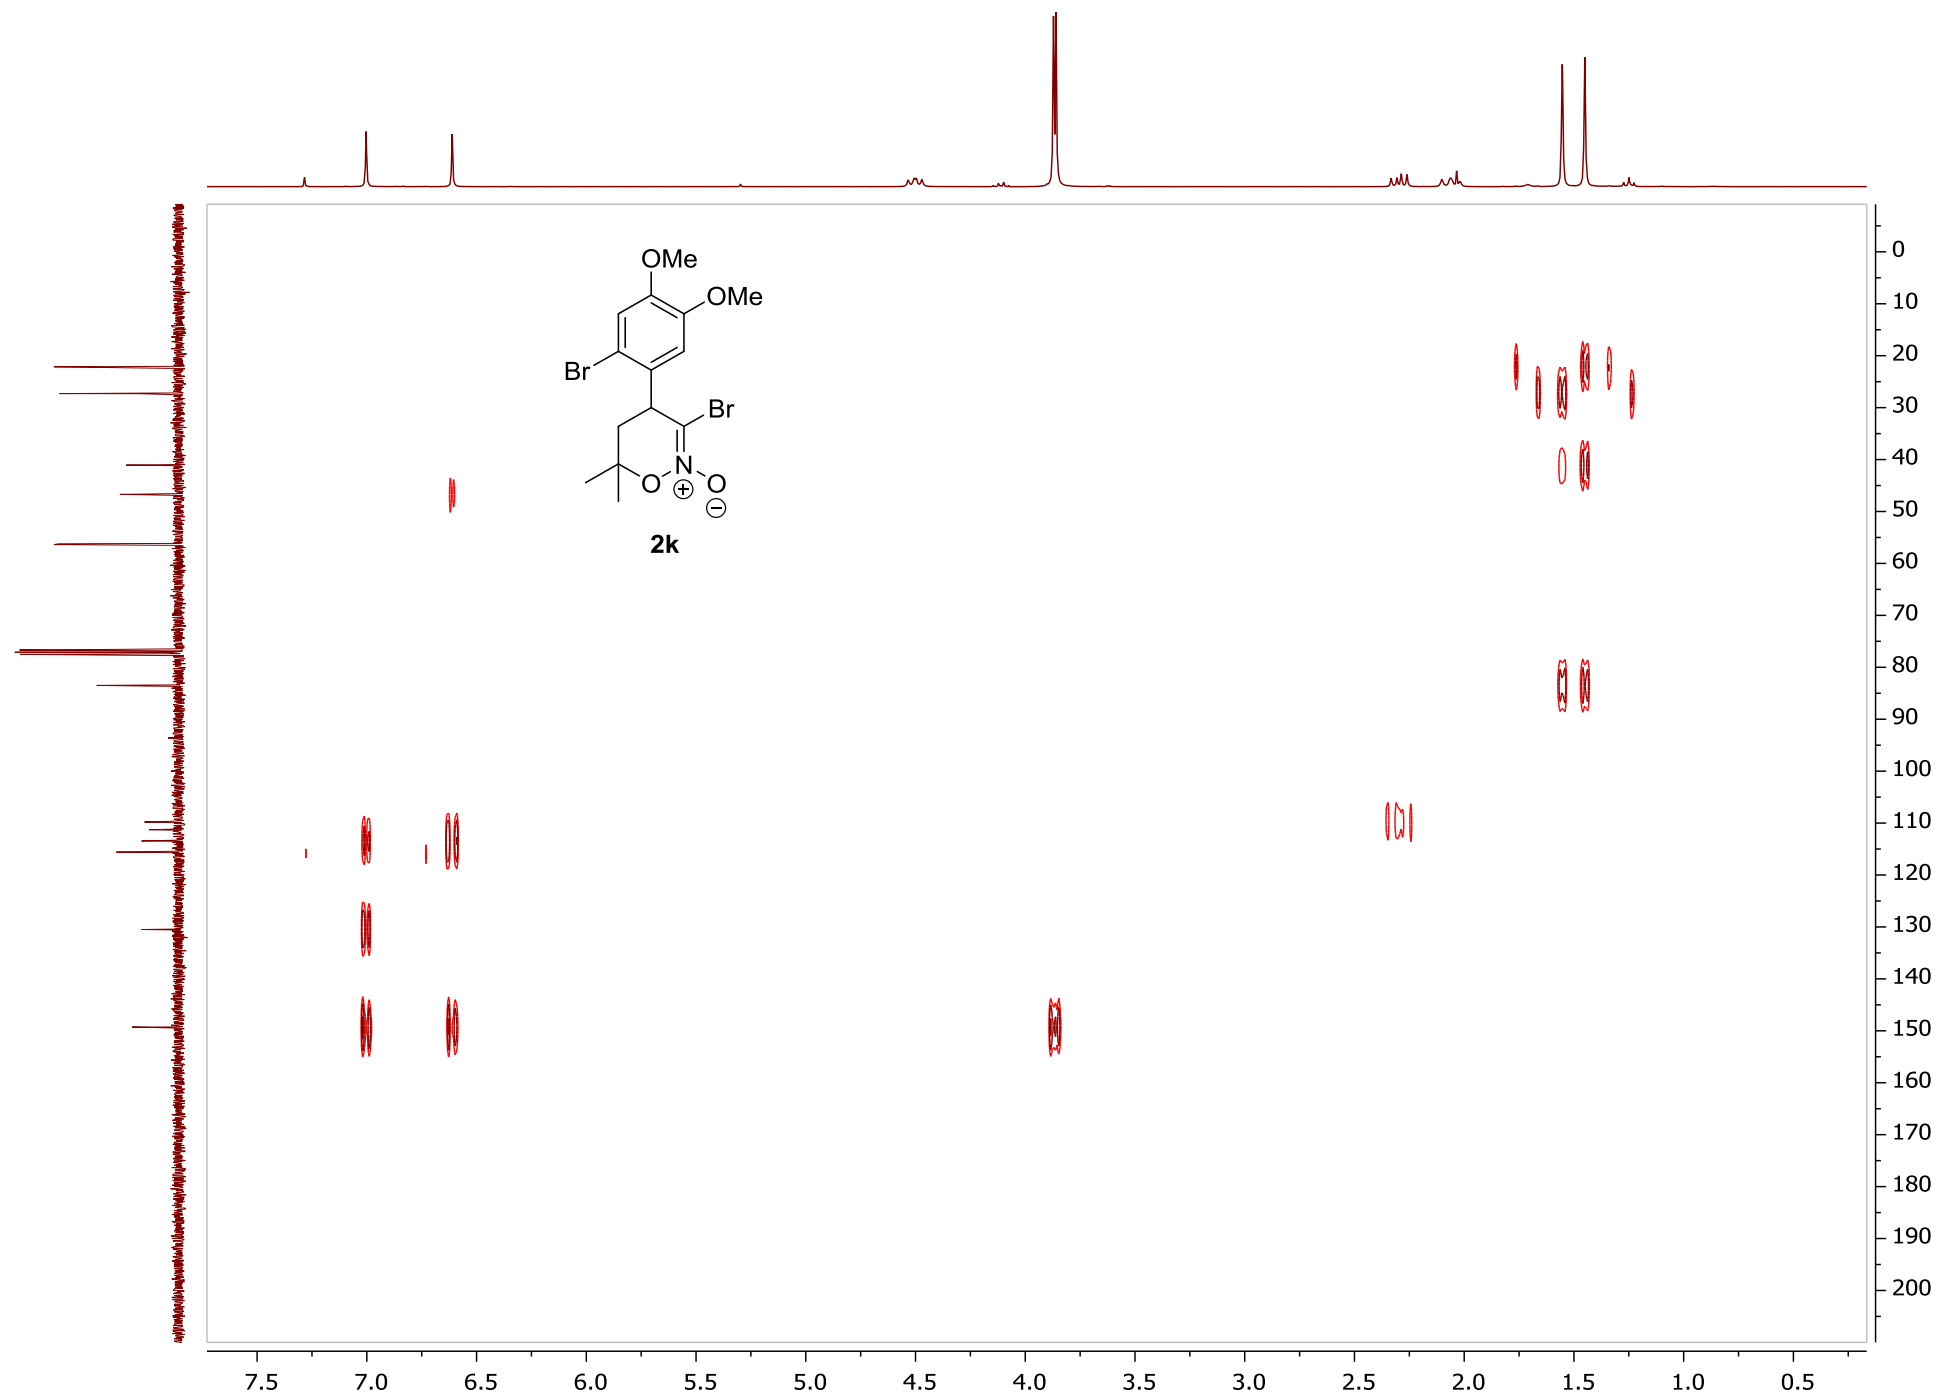

**3-Bromo-4-cyclopropyl-6,6-dimethyl-5,6-dihydro-4H-1,2-oxazine 2-oxide 21**

<sup>1</sup>H NMR (300 MHz, CDCl<sub>3</sub>)

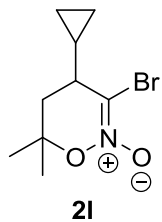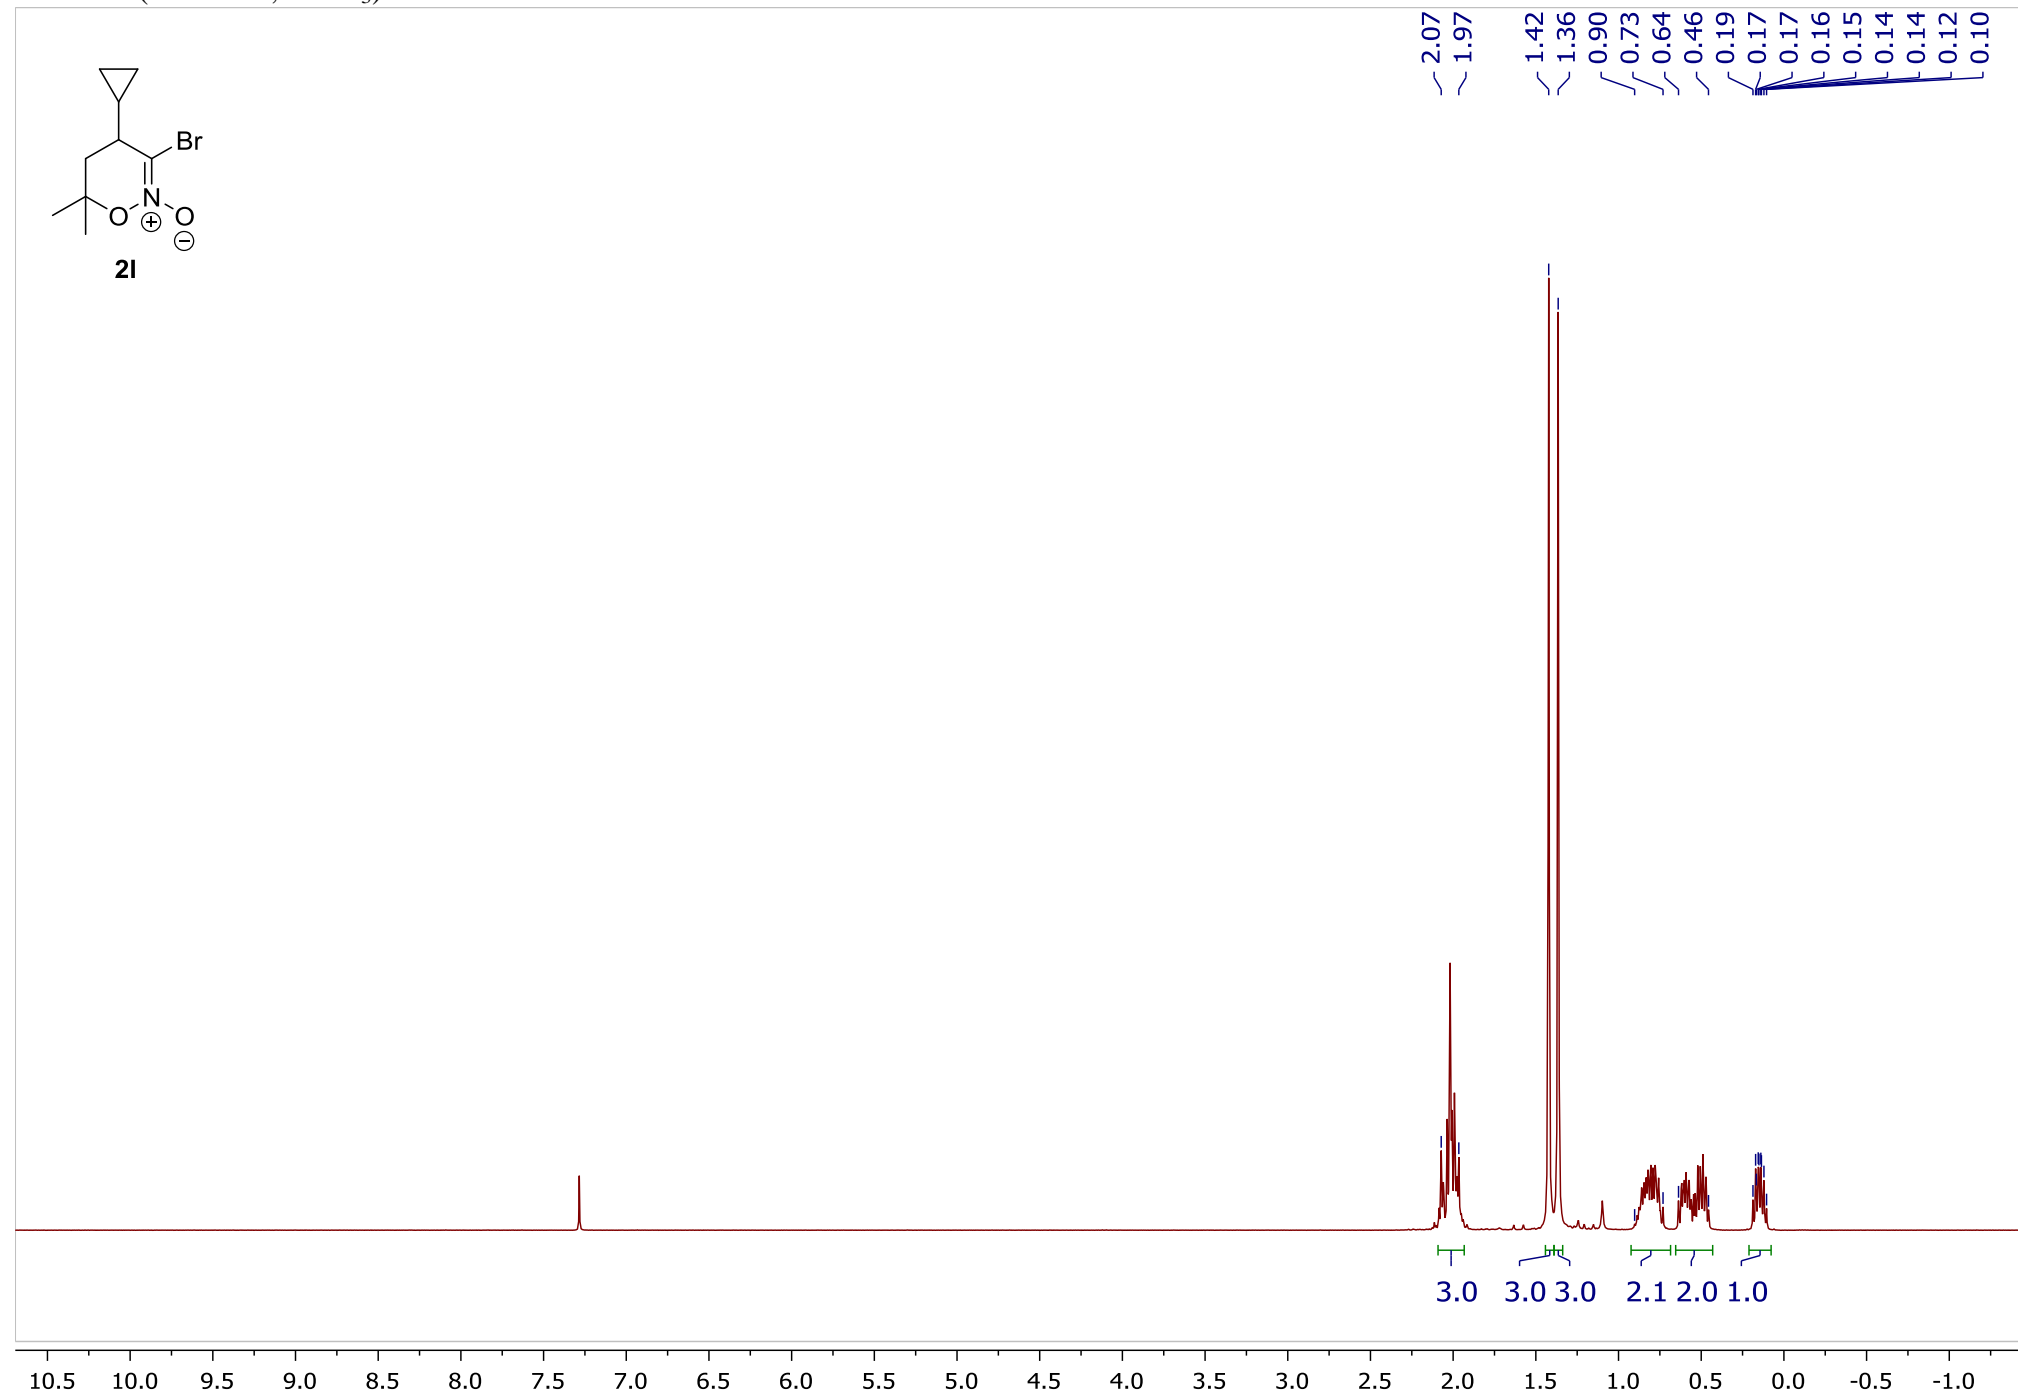

$^{13}\text{C}\{^1\text{H}\}$  NMR (75 MHz,  $\text{CDCl}_3$ )

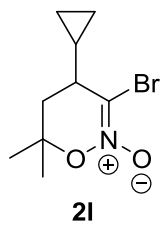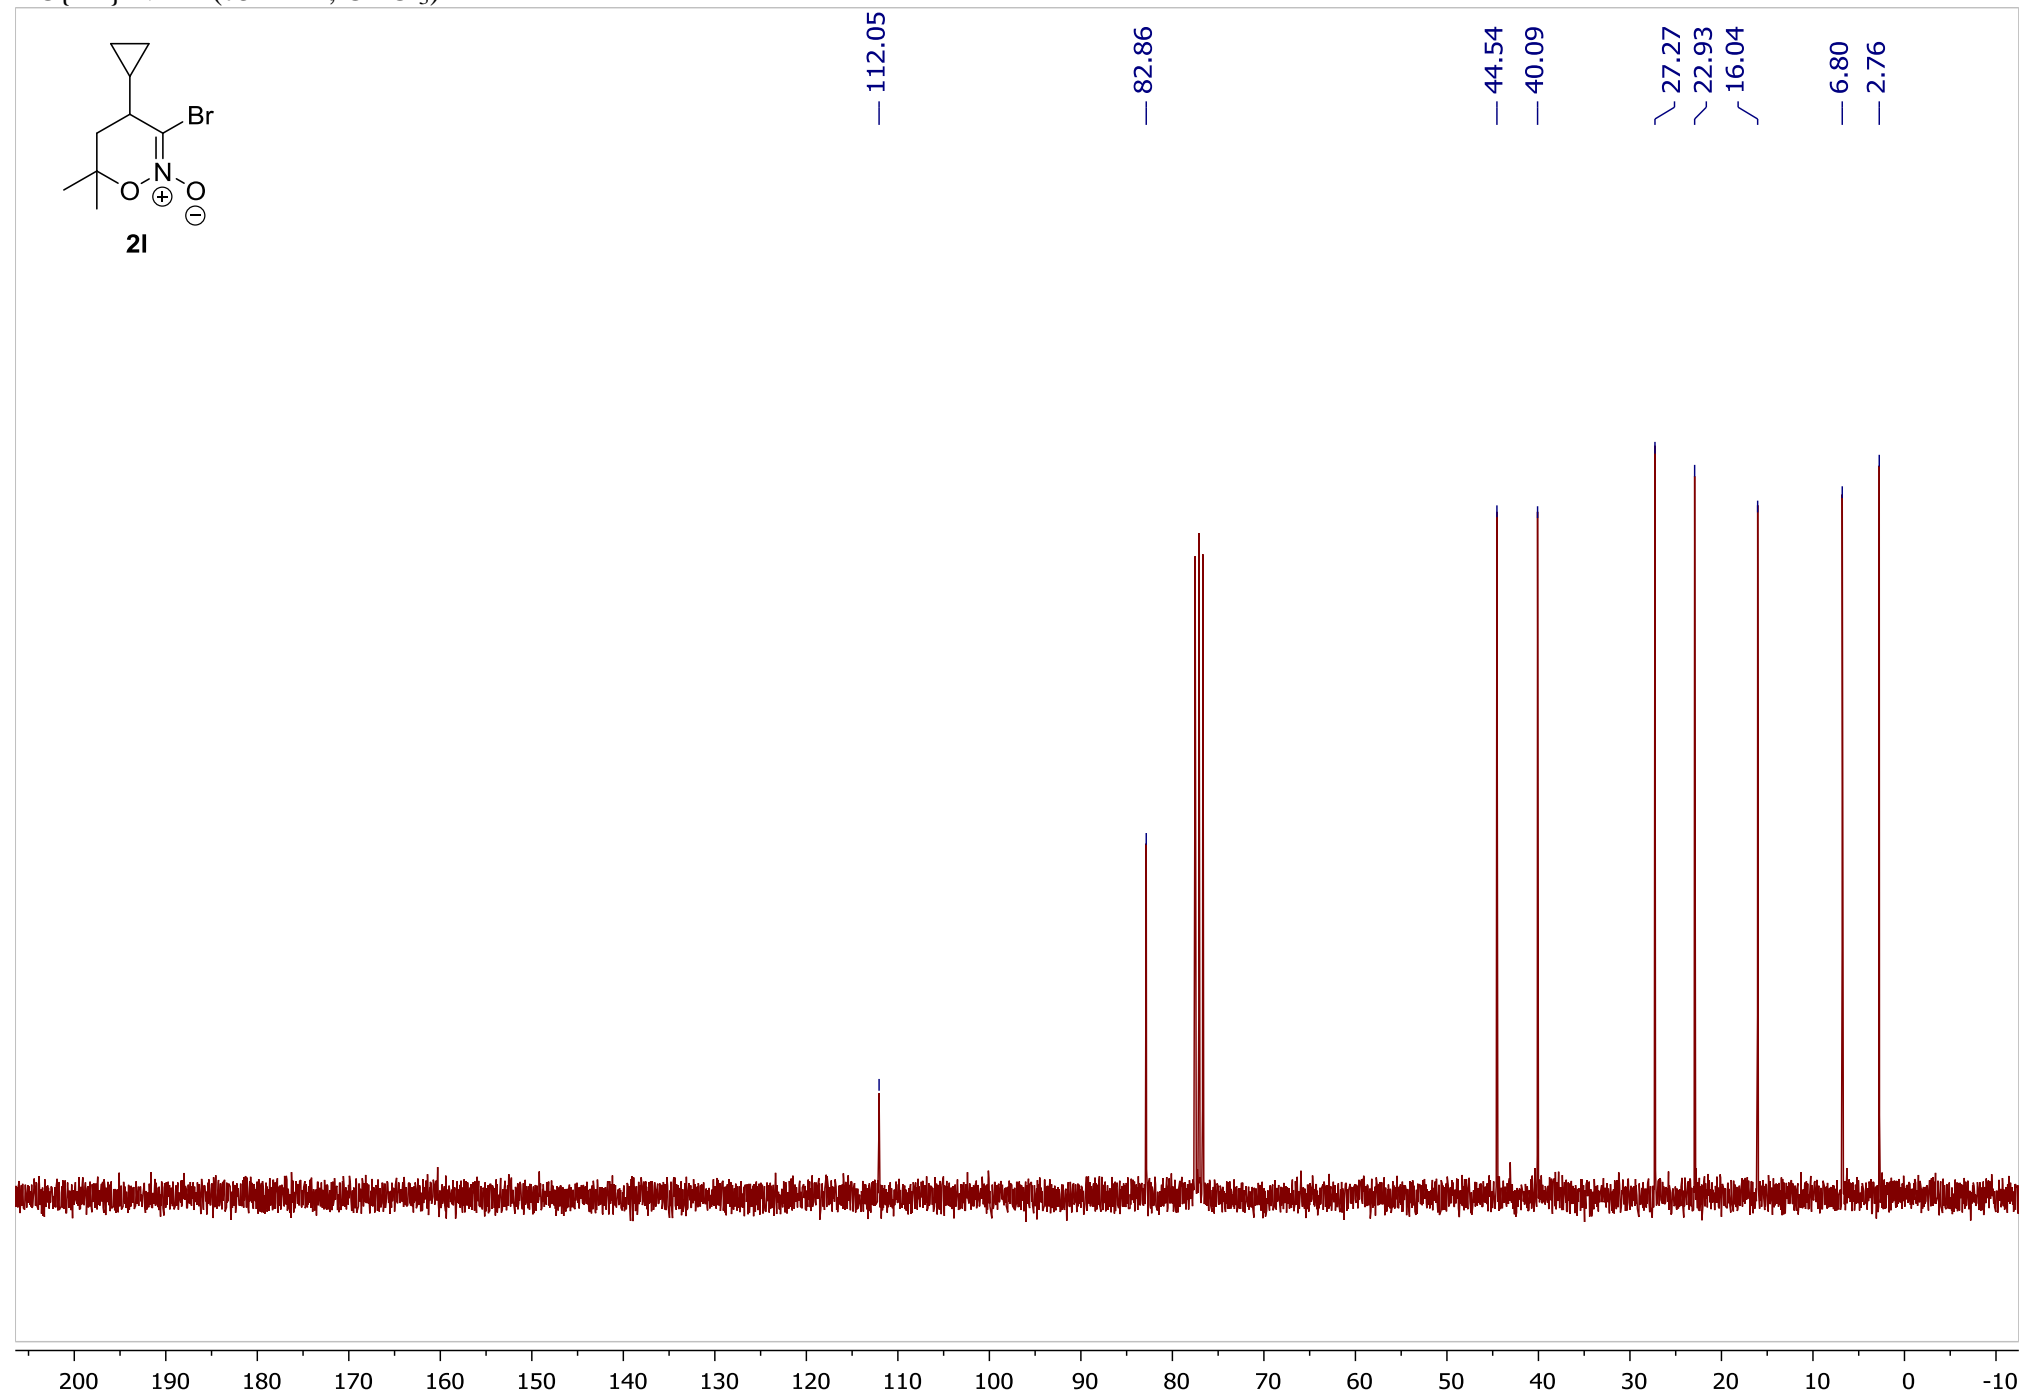

$^{13}\text{C}$  DEPT 135 (75 MHz,  $\text{CDCl}_3$ )

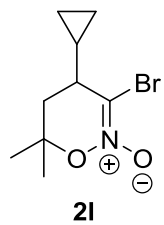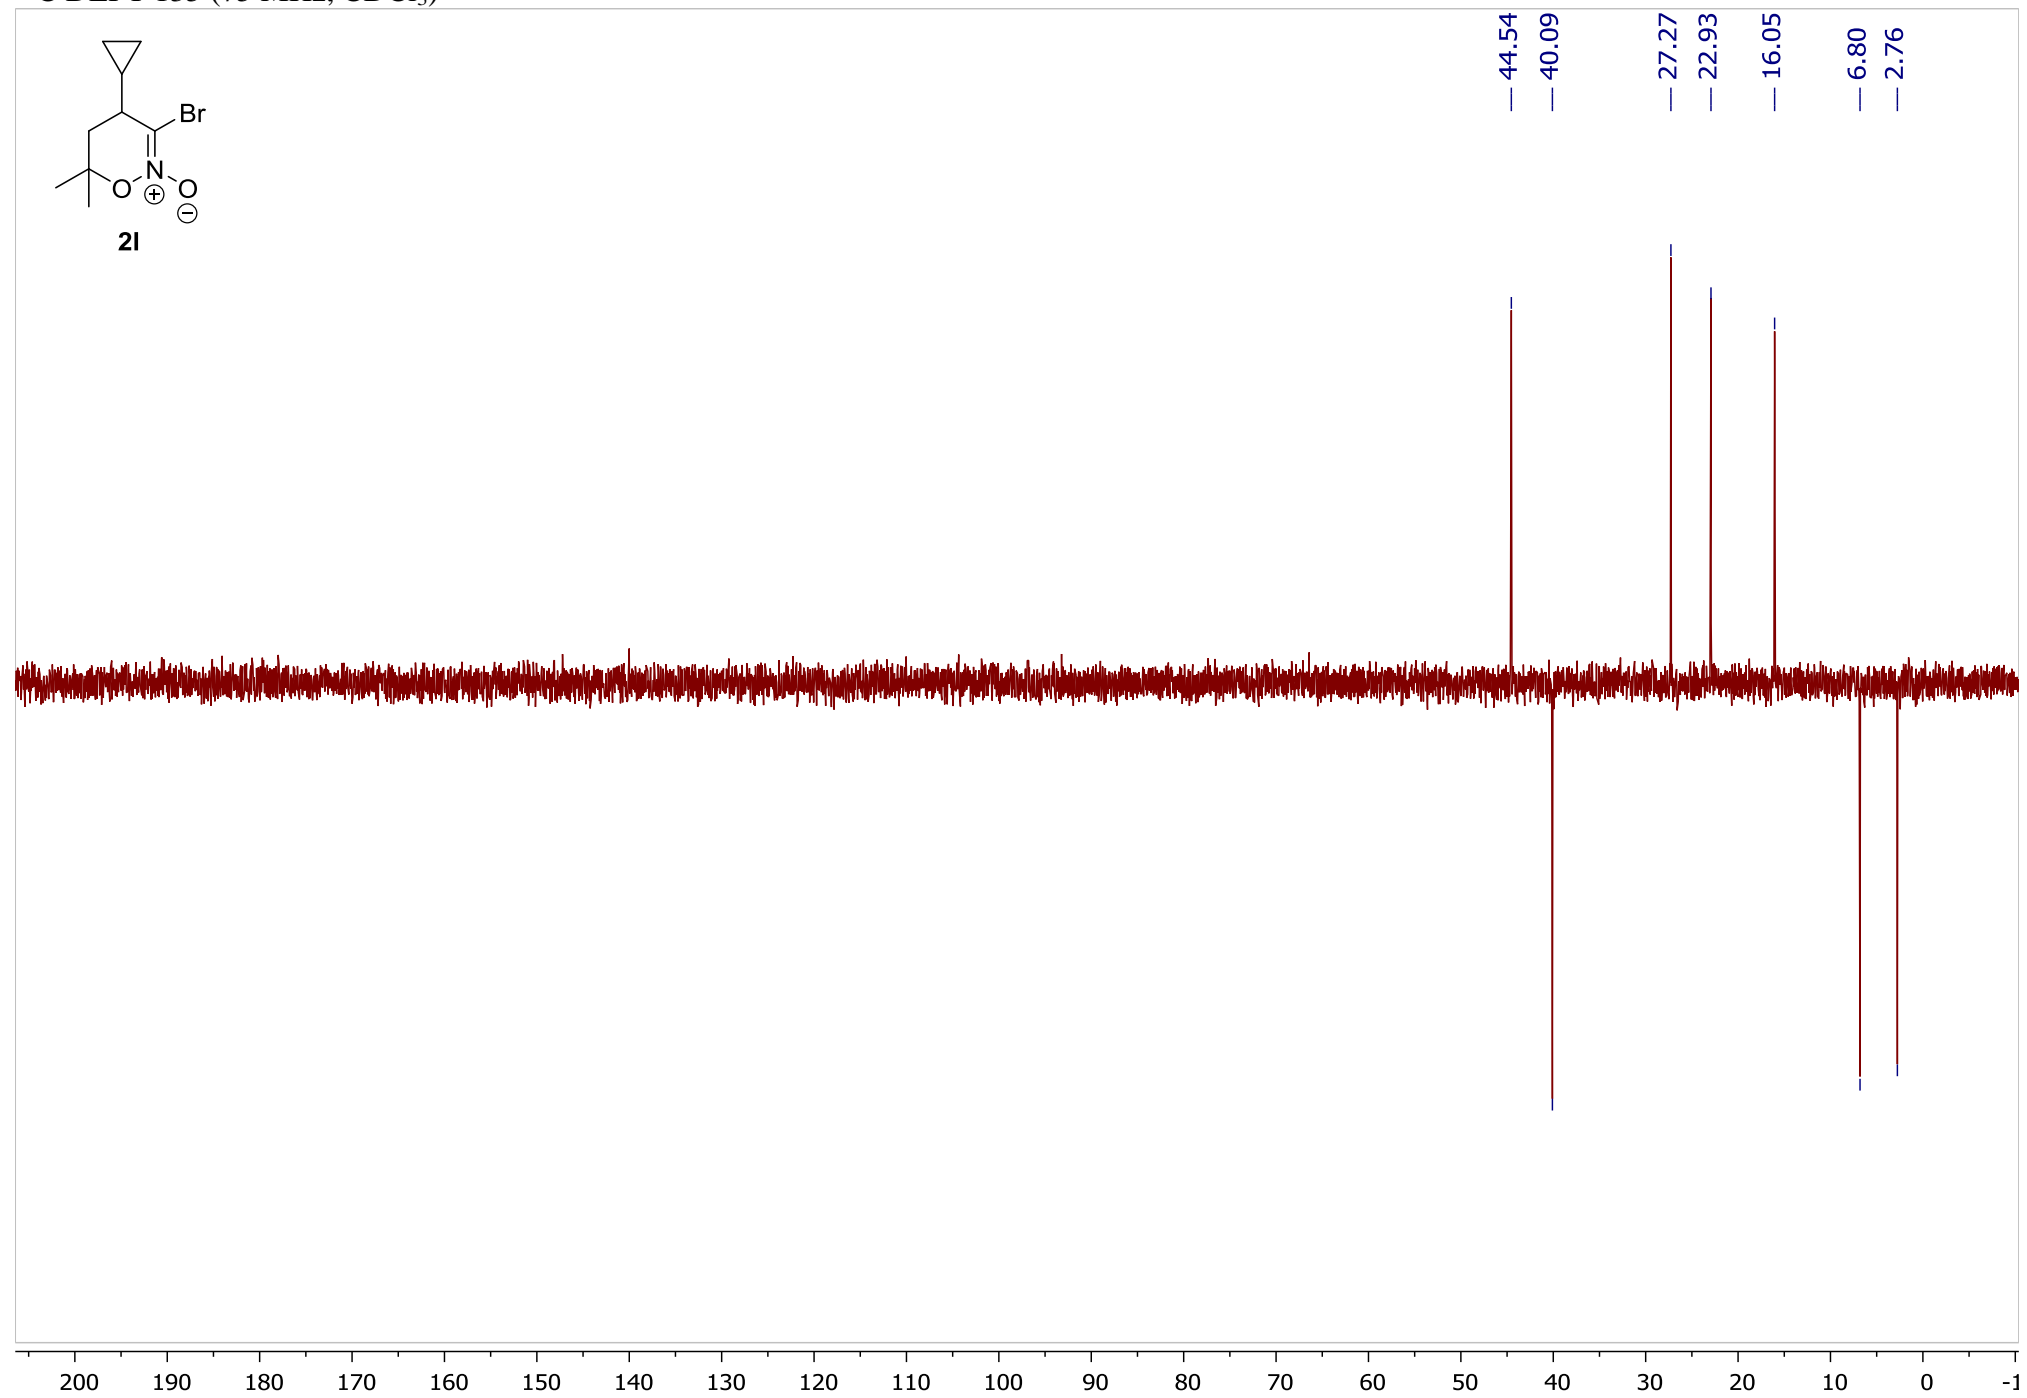



### 3-Bromo-6,6-dimethyl-4-phenethyl-5,6-dihydro-4H-1,2-oxazine 2-oxide 2m

$^1\text{H}$  NMR (300 MHz,  $\text{CDCl}_3$ )

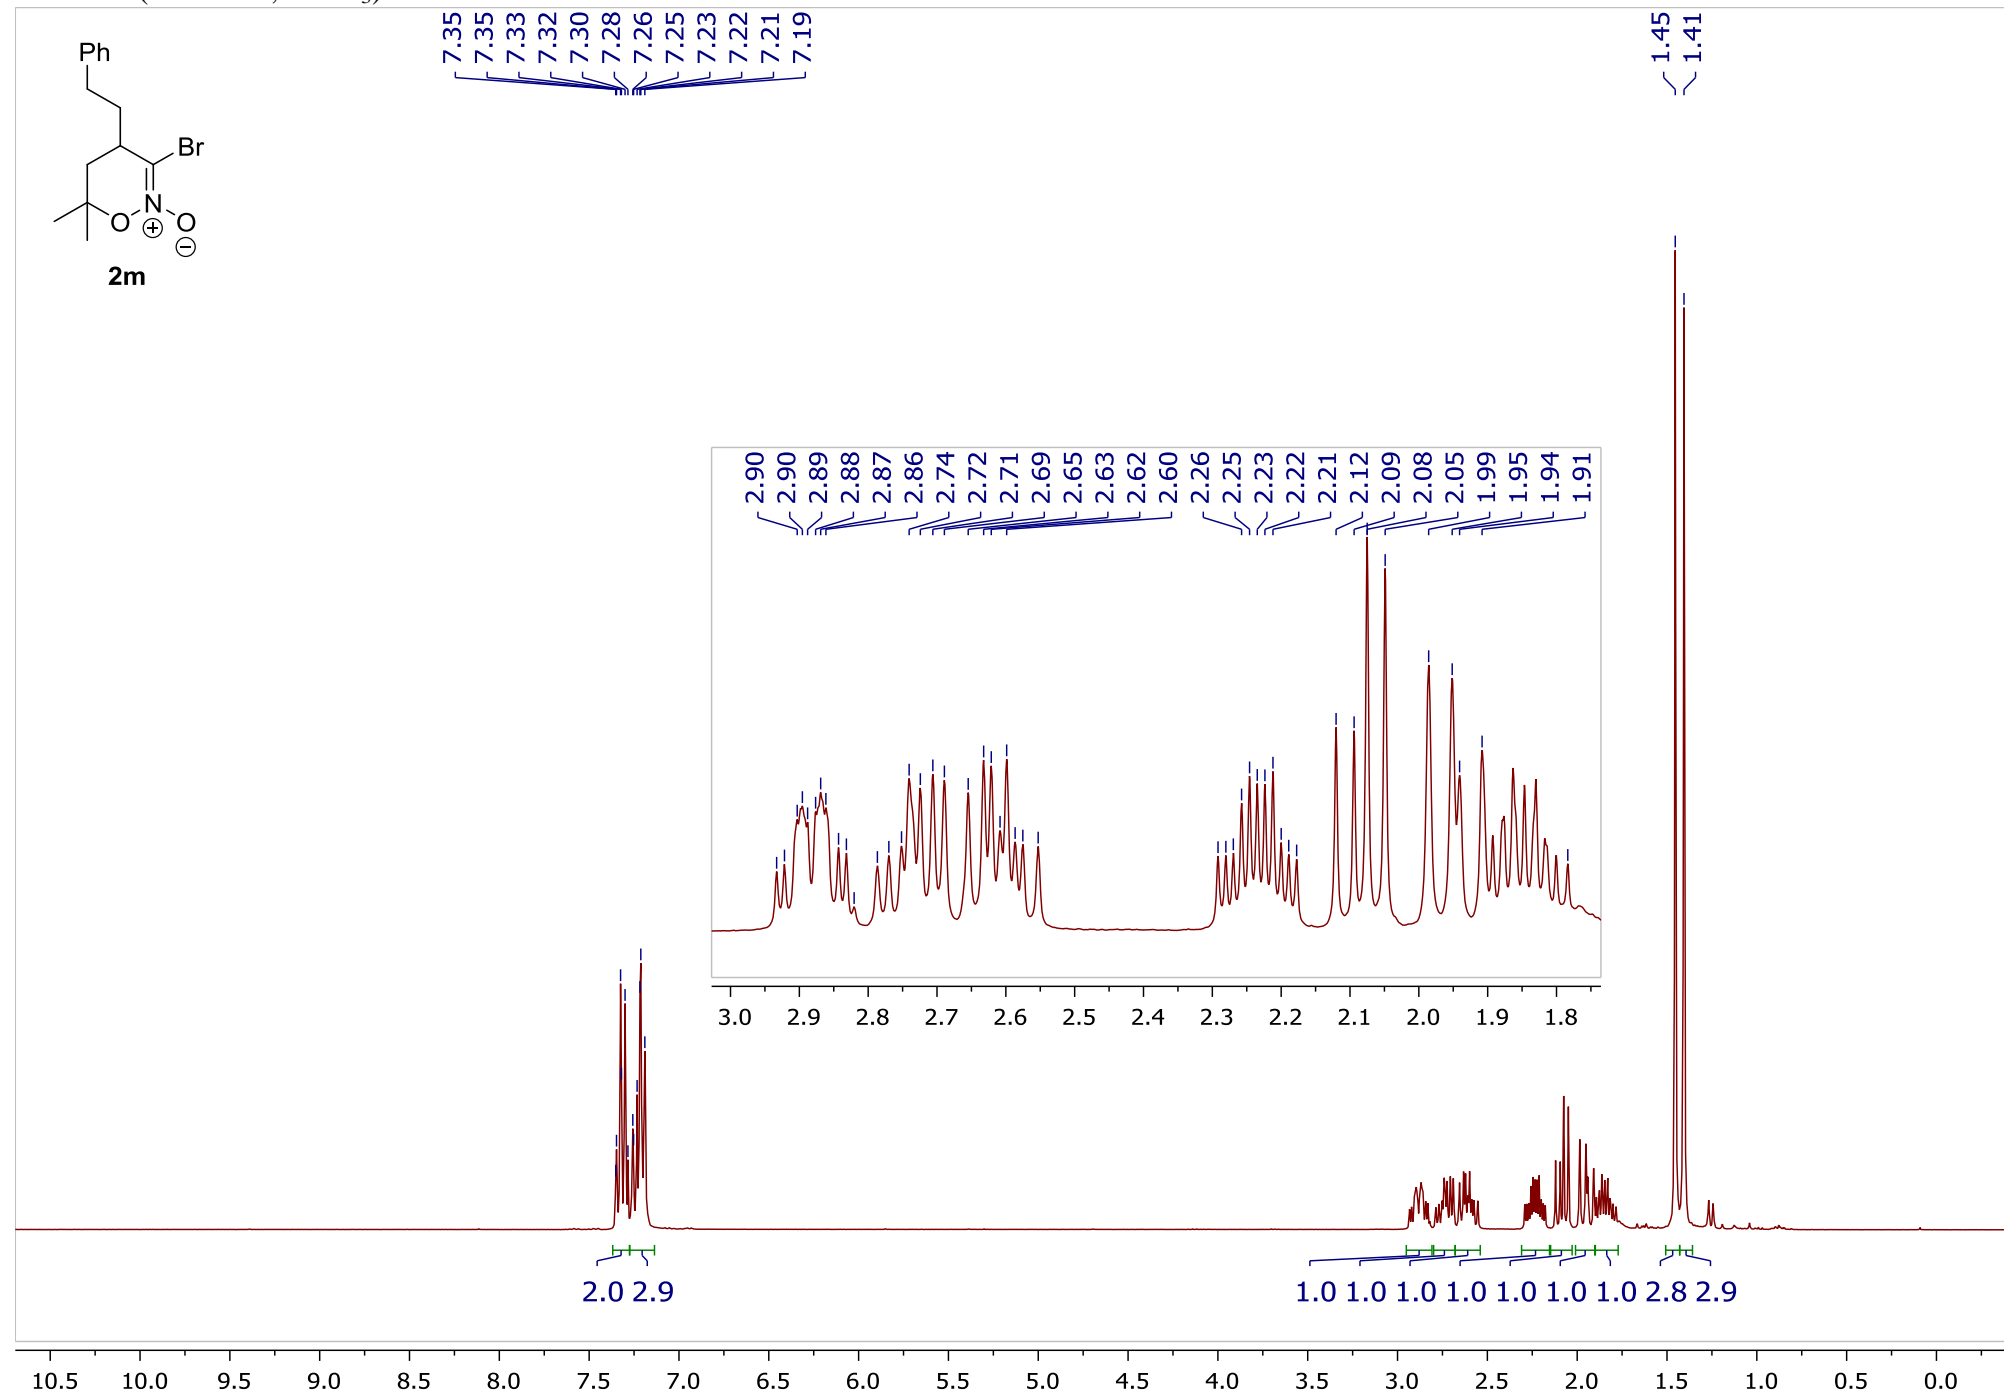

$^{13}\text{C}\{^1\text{H}\}$  NMR (75 MHz,  $\text{CDCl}_3$ )

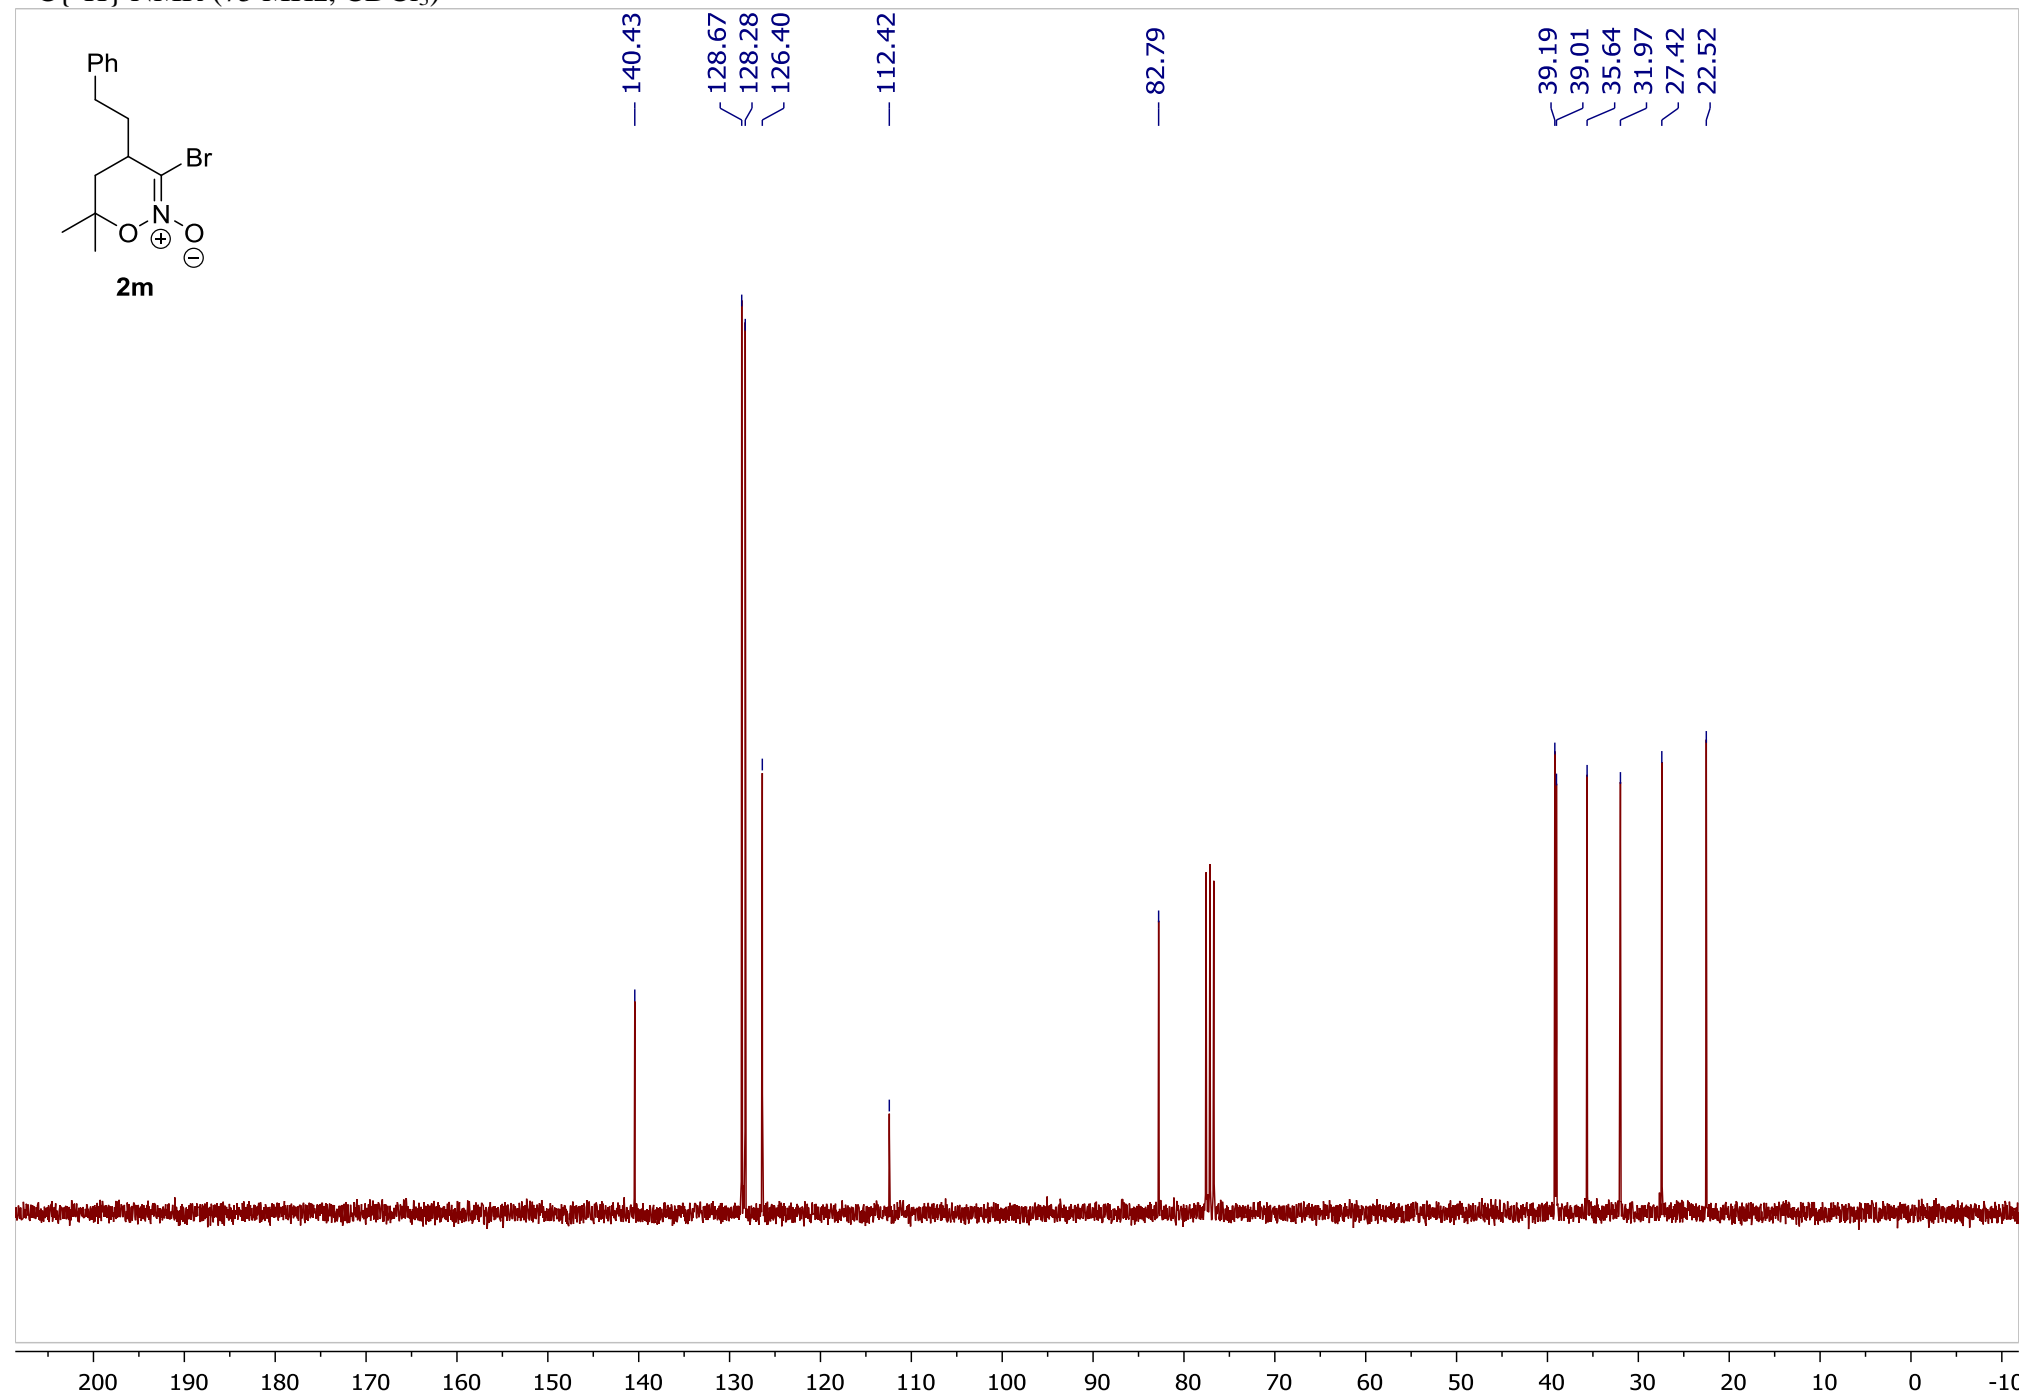

$^{13}\text{C}$  DEPT 135 (75 MHz,  $\text{CDCl}_3$ )

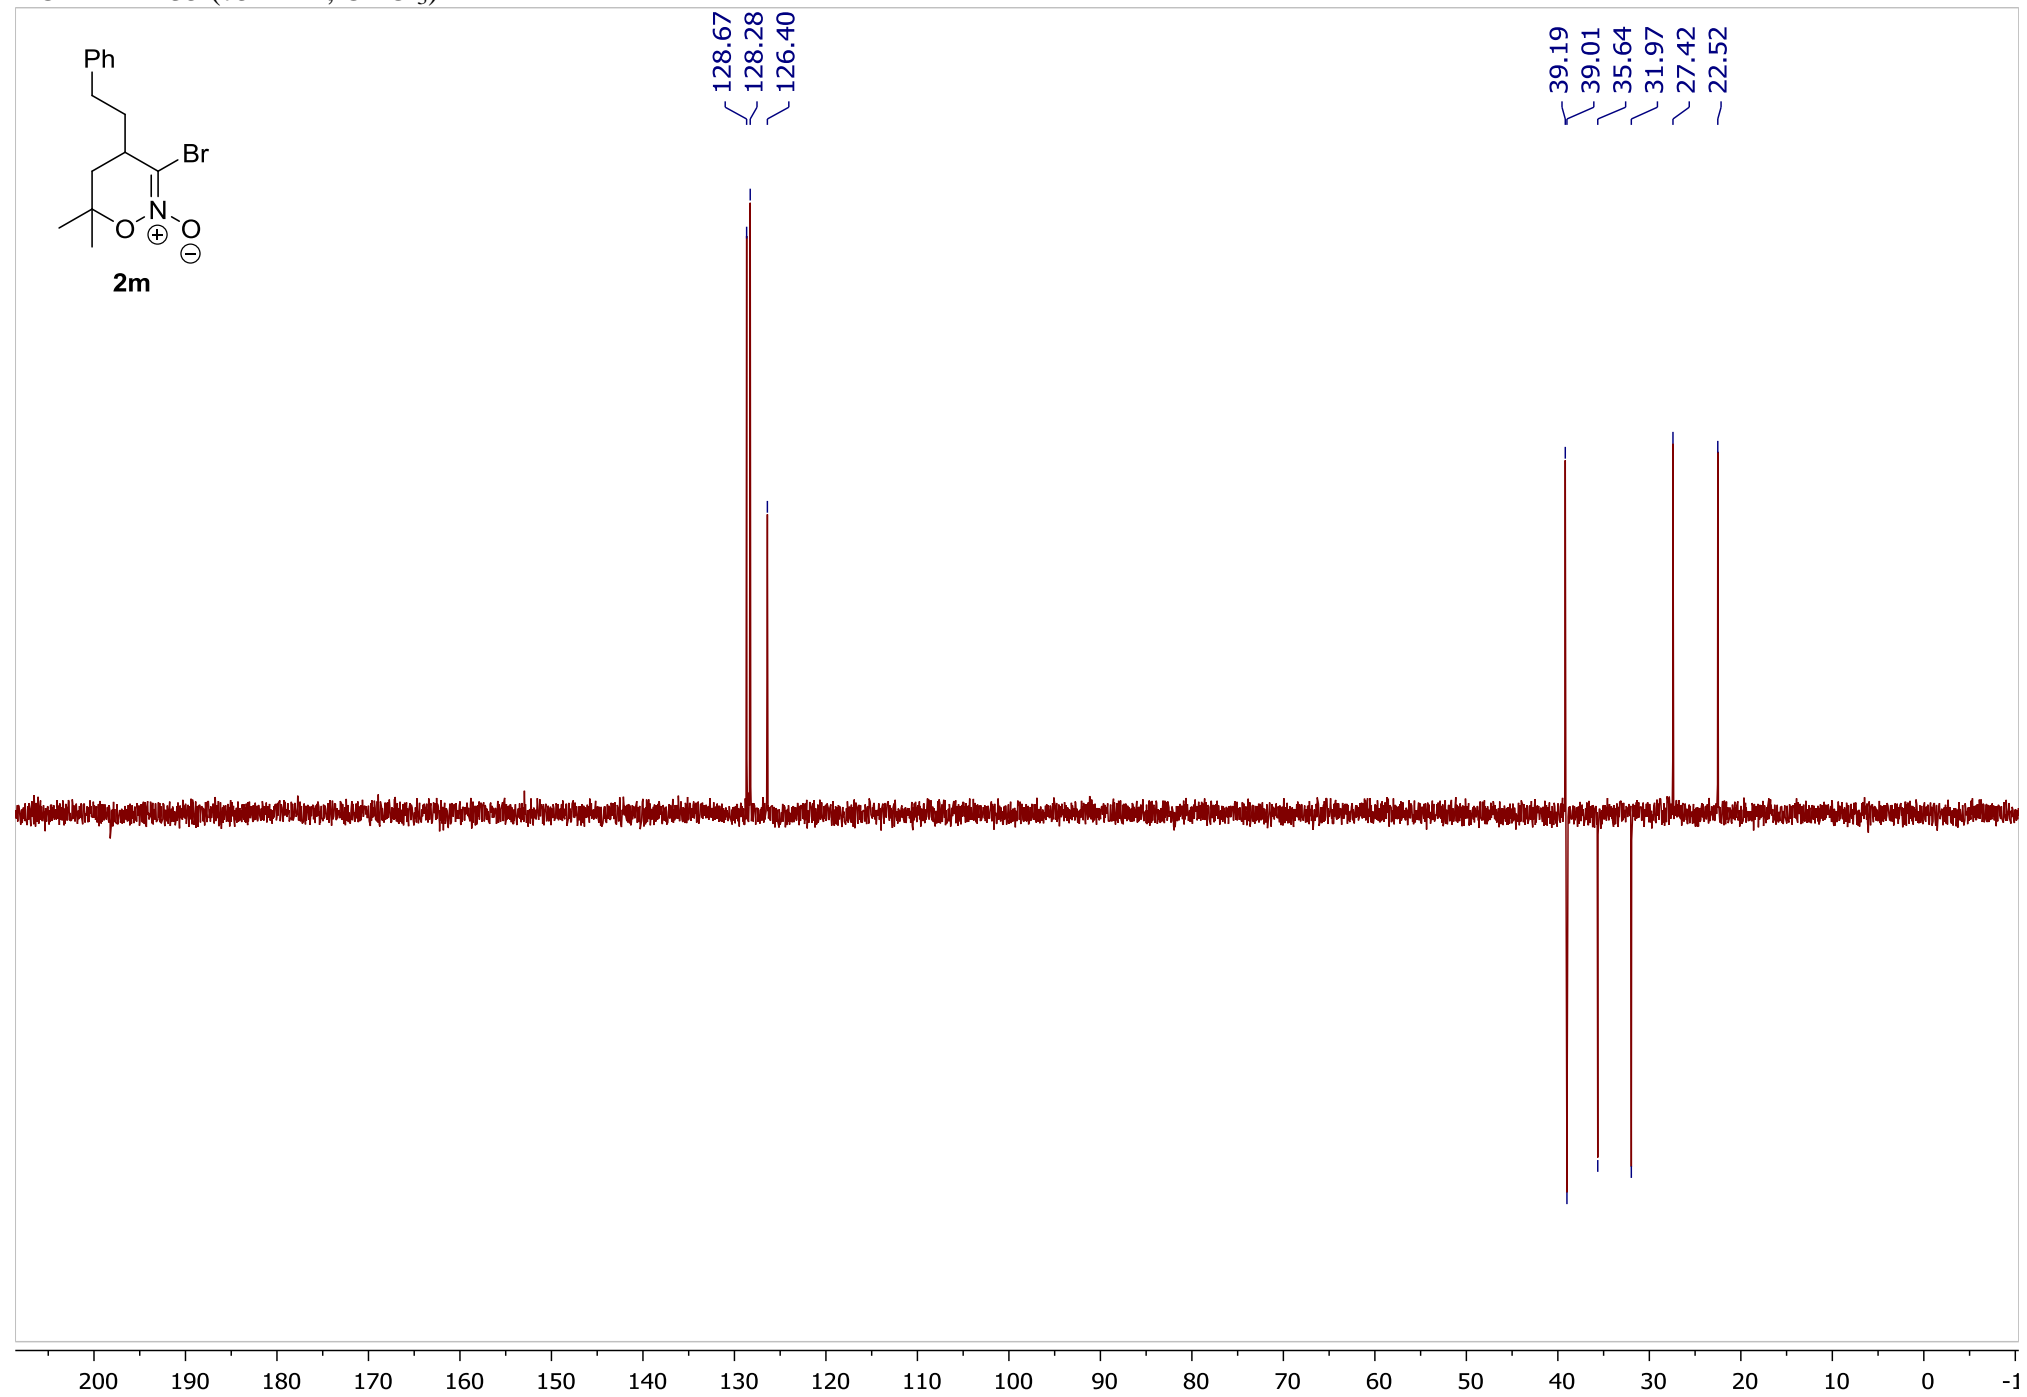

**3-Chloro-4-(4-methoxyphenyl)-6,6-dimethyl-5,6-dihydro-4H-1,2-oxazine 2-oxide 2n**

<sup>1</sup>H NMR (300 MHz, CDCl<sub>3</sub>)

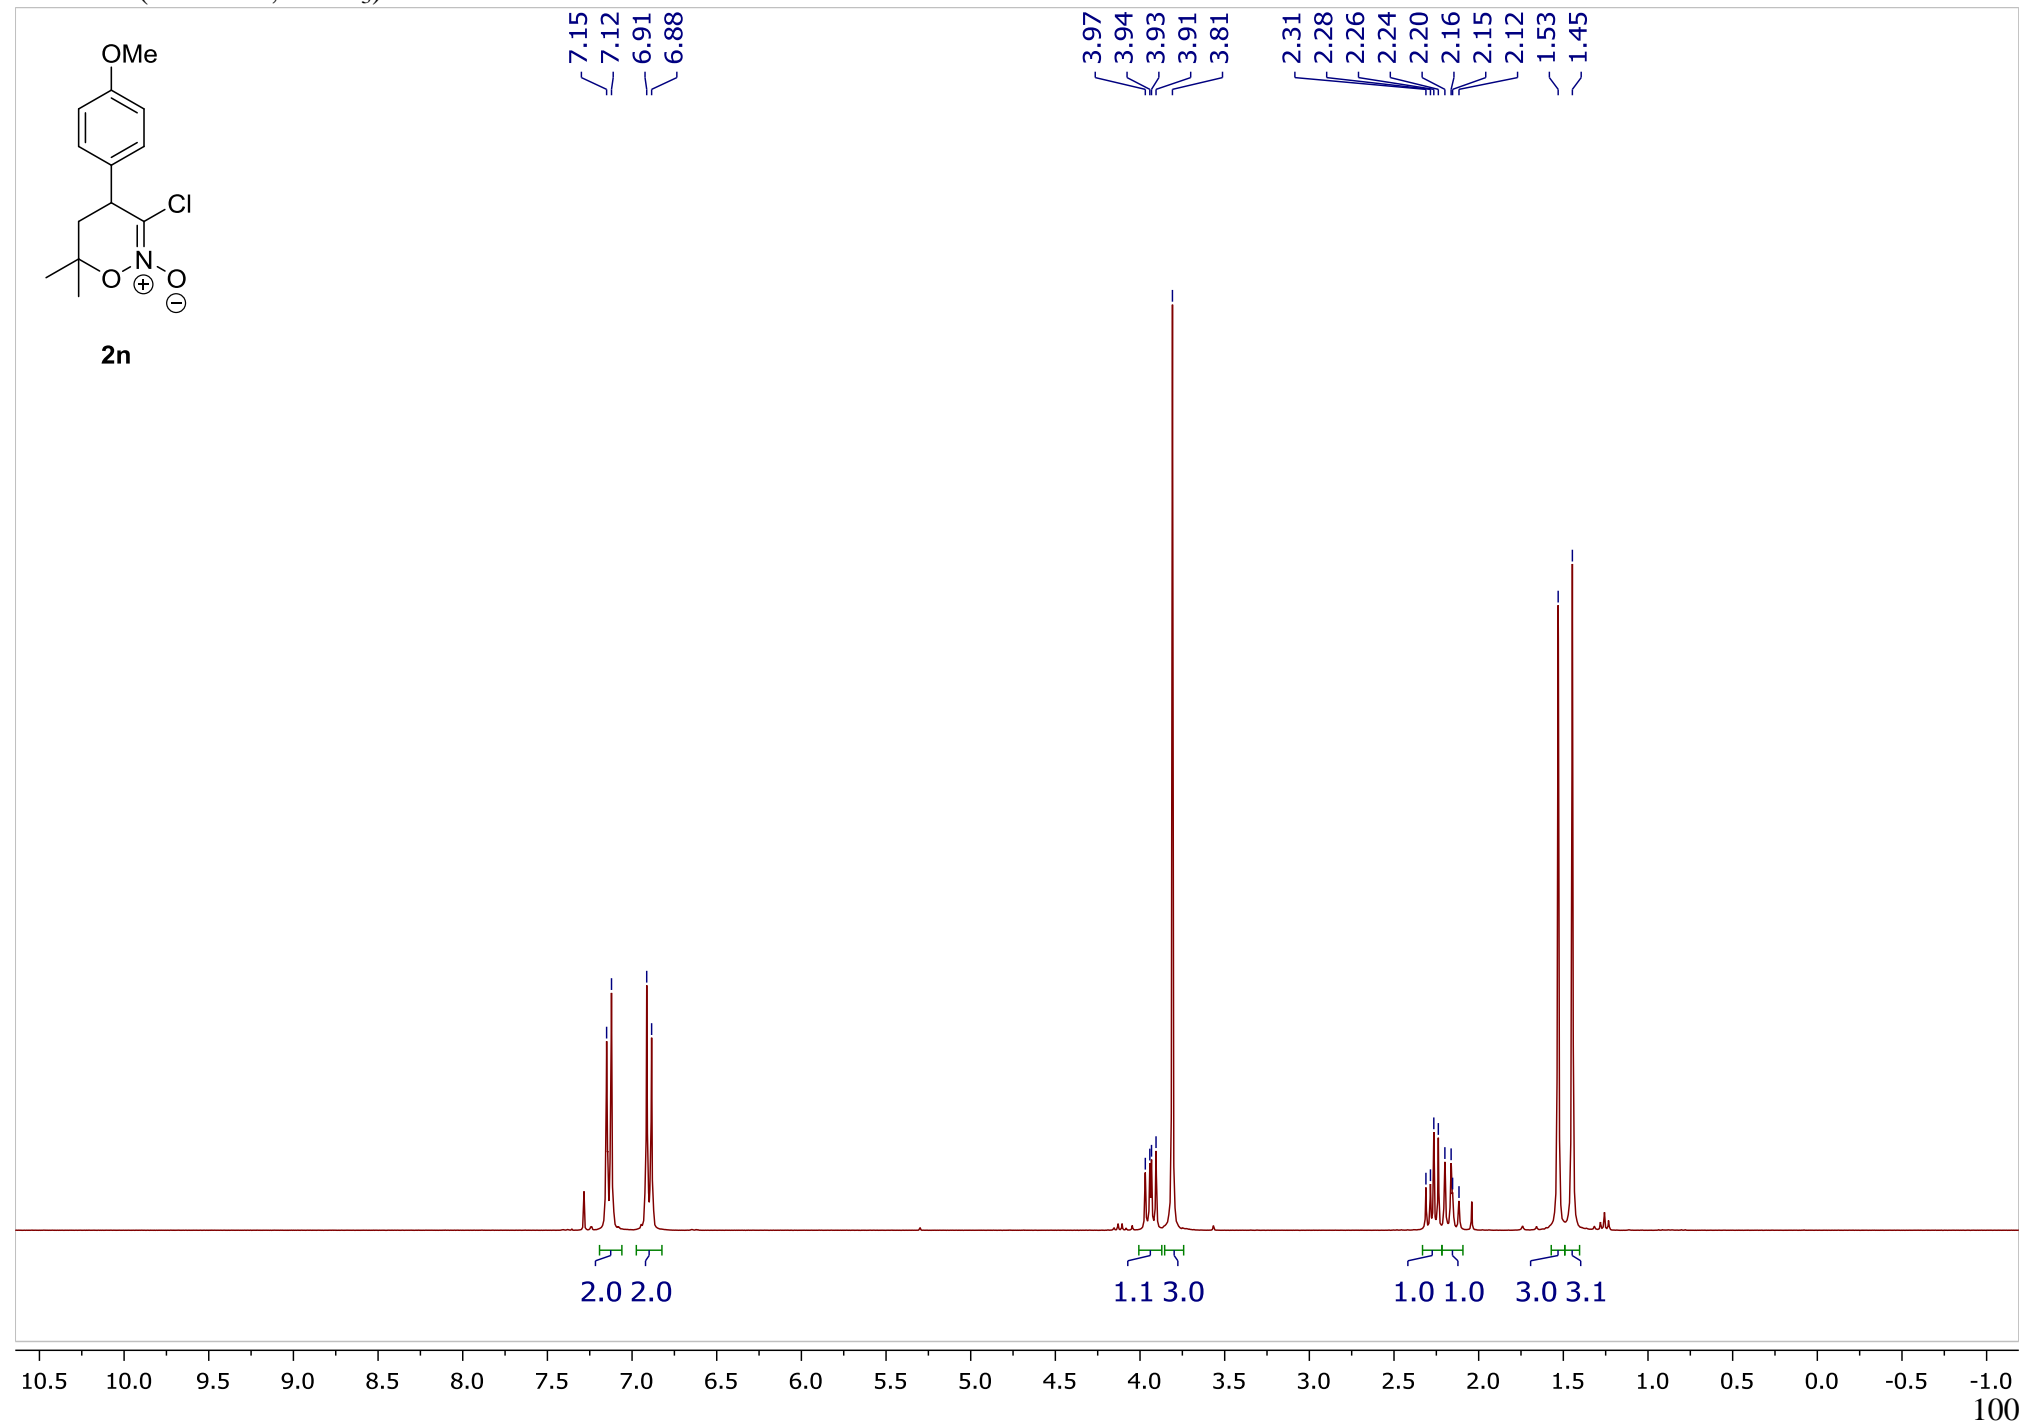

$^{13}\text{C}\{^1\text{H}\}$  NMR (75 MHz,  $\text{CDCl}_3$ )

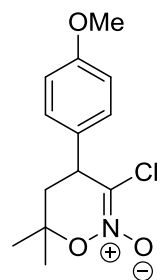

**2n**

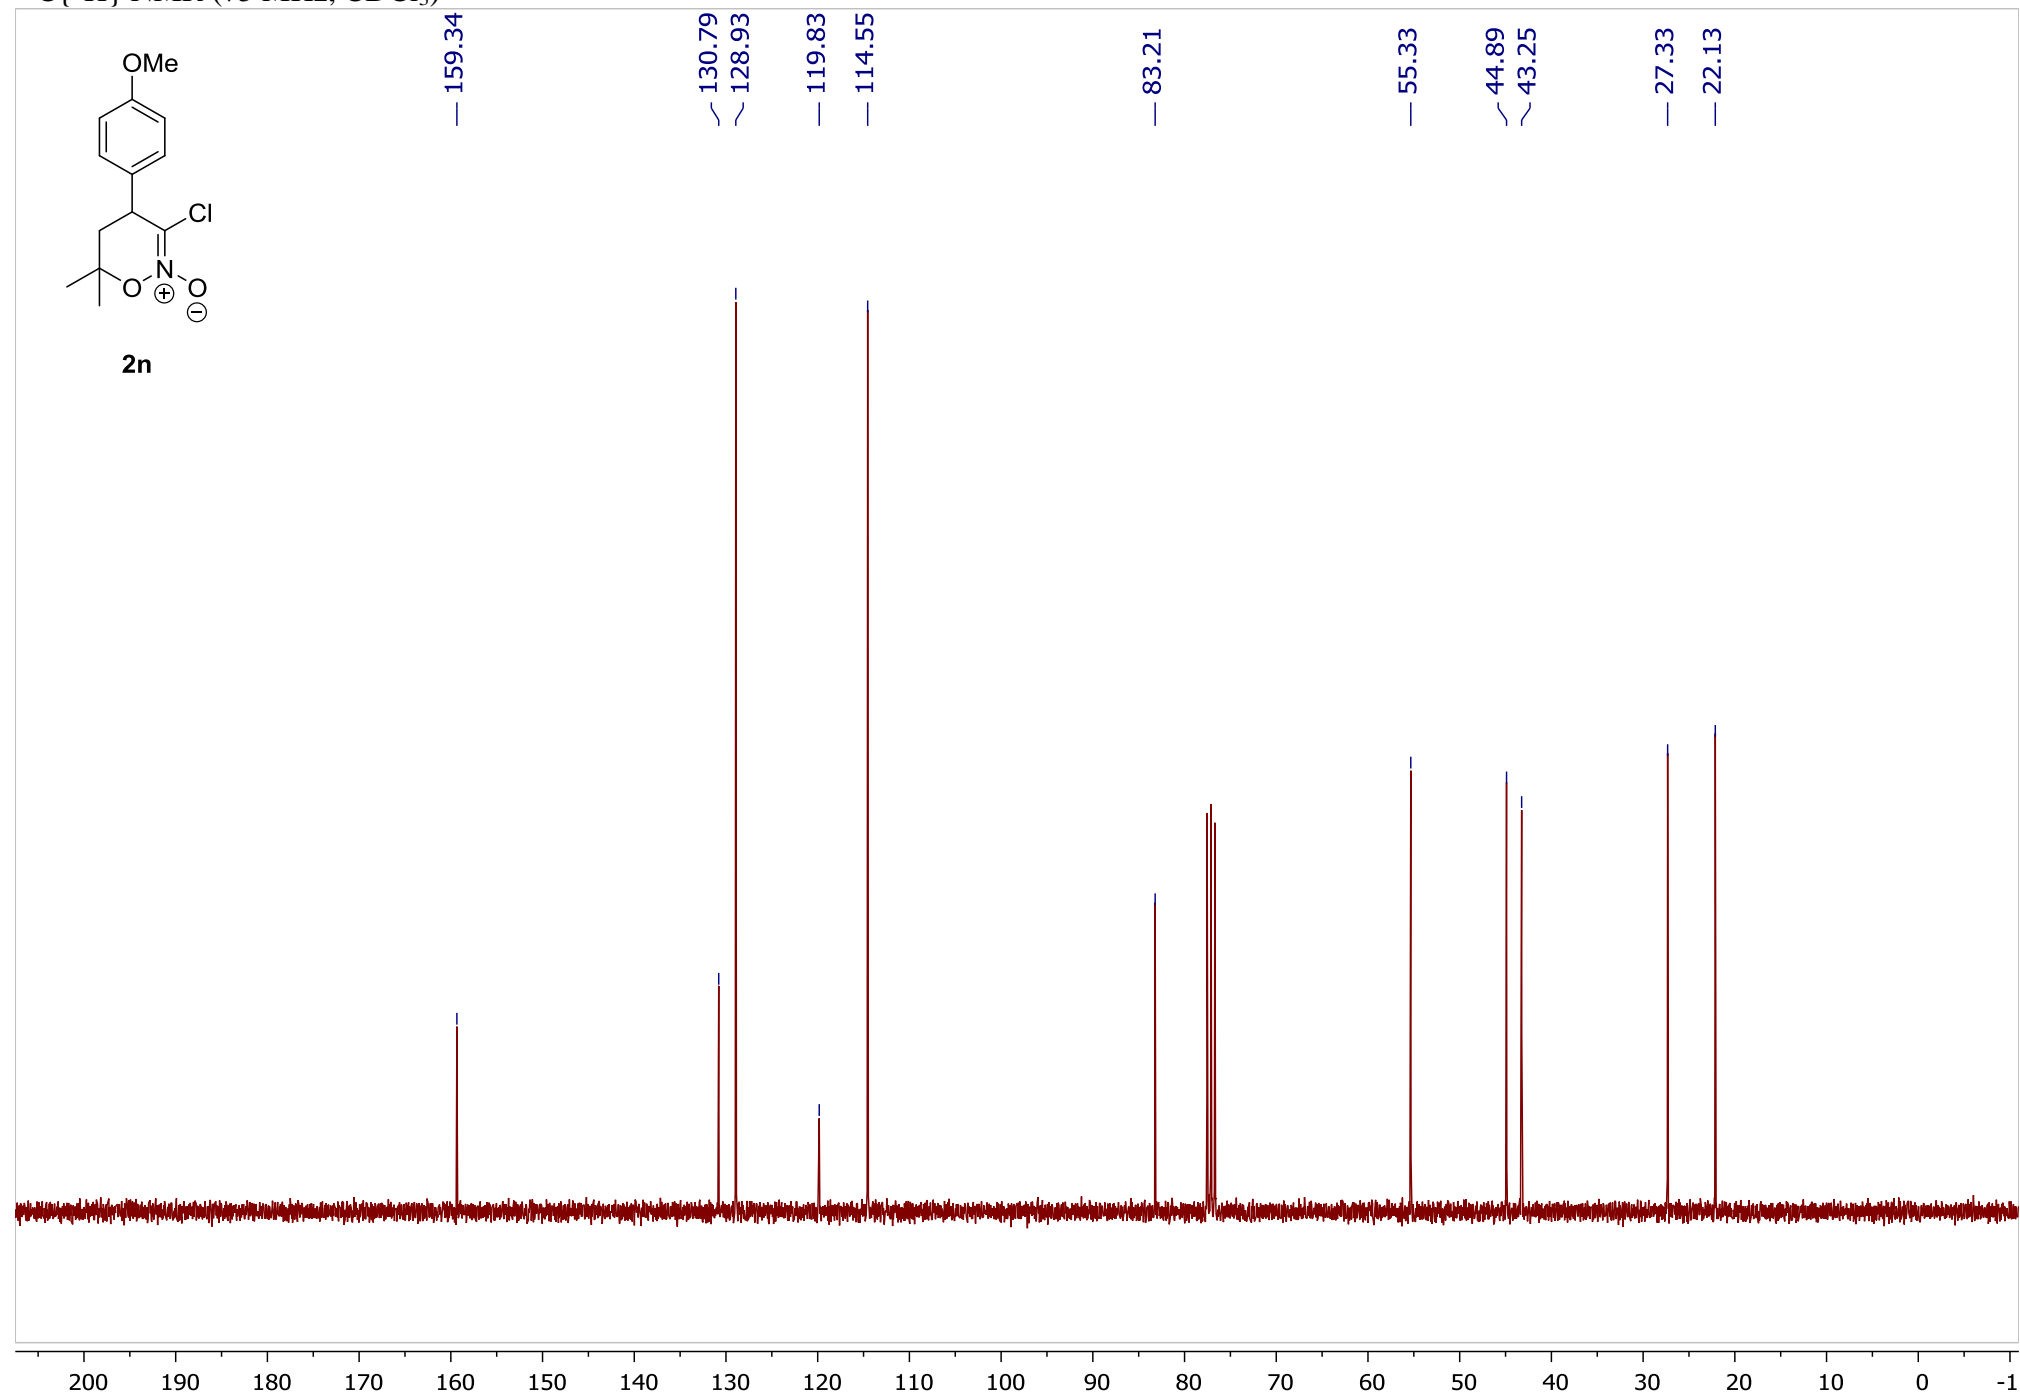

$^{13}\text{C}$  DEPT 135 (75 MHz,  $\text{CDCl}_3$ )

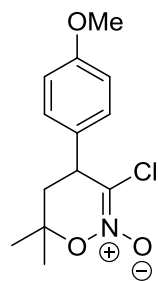

**2n**

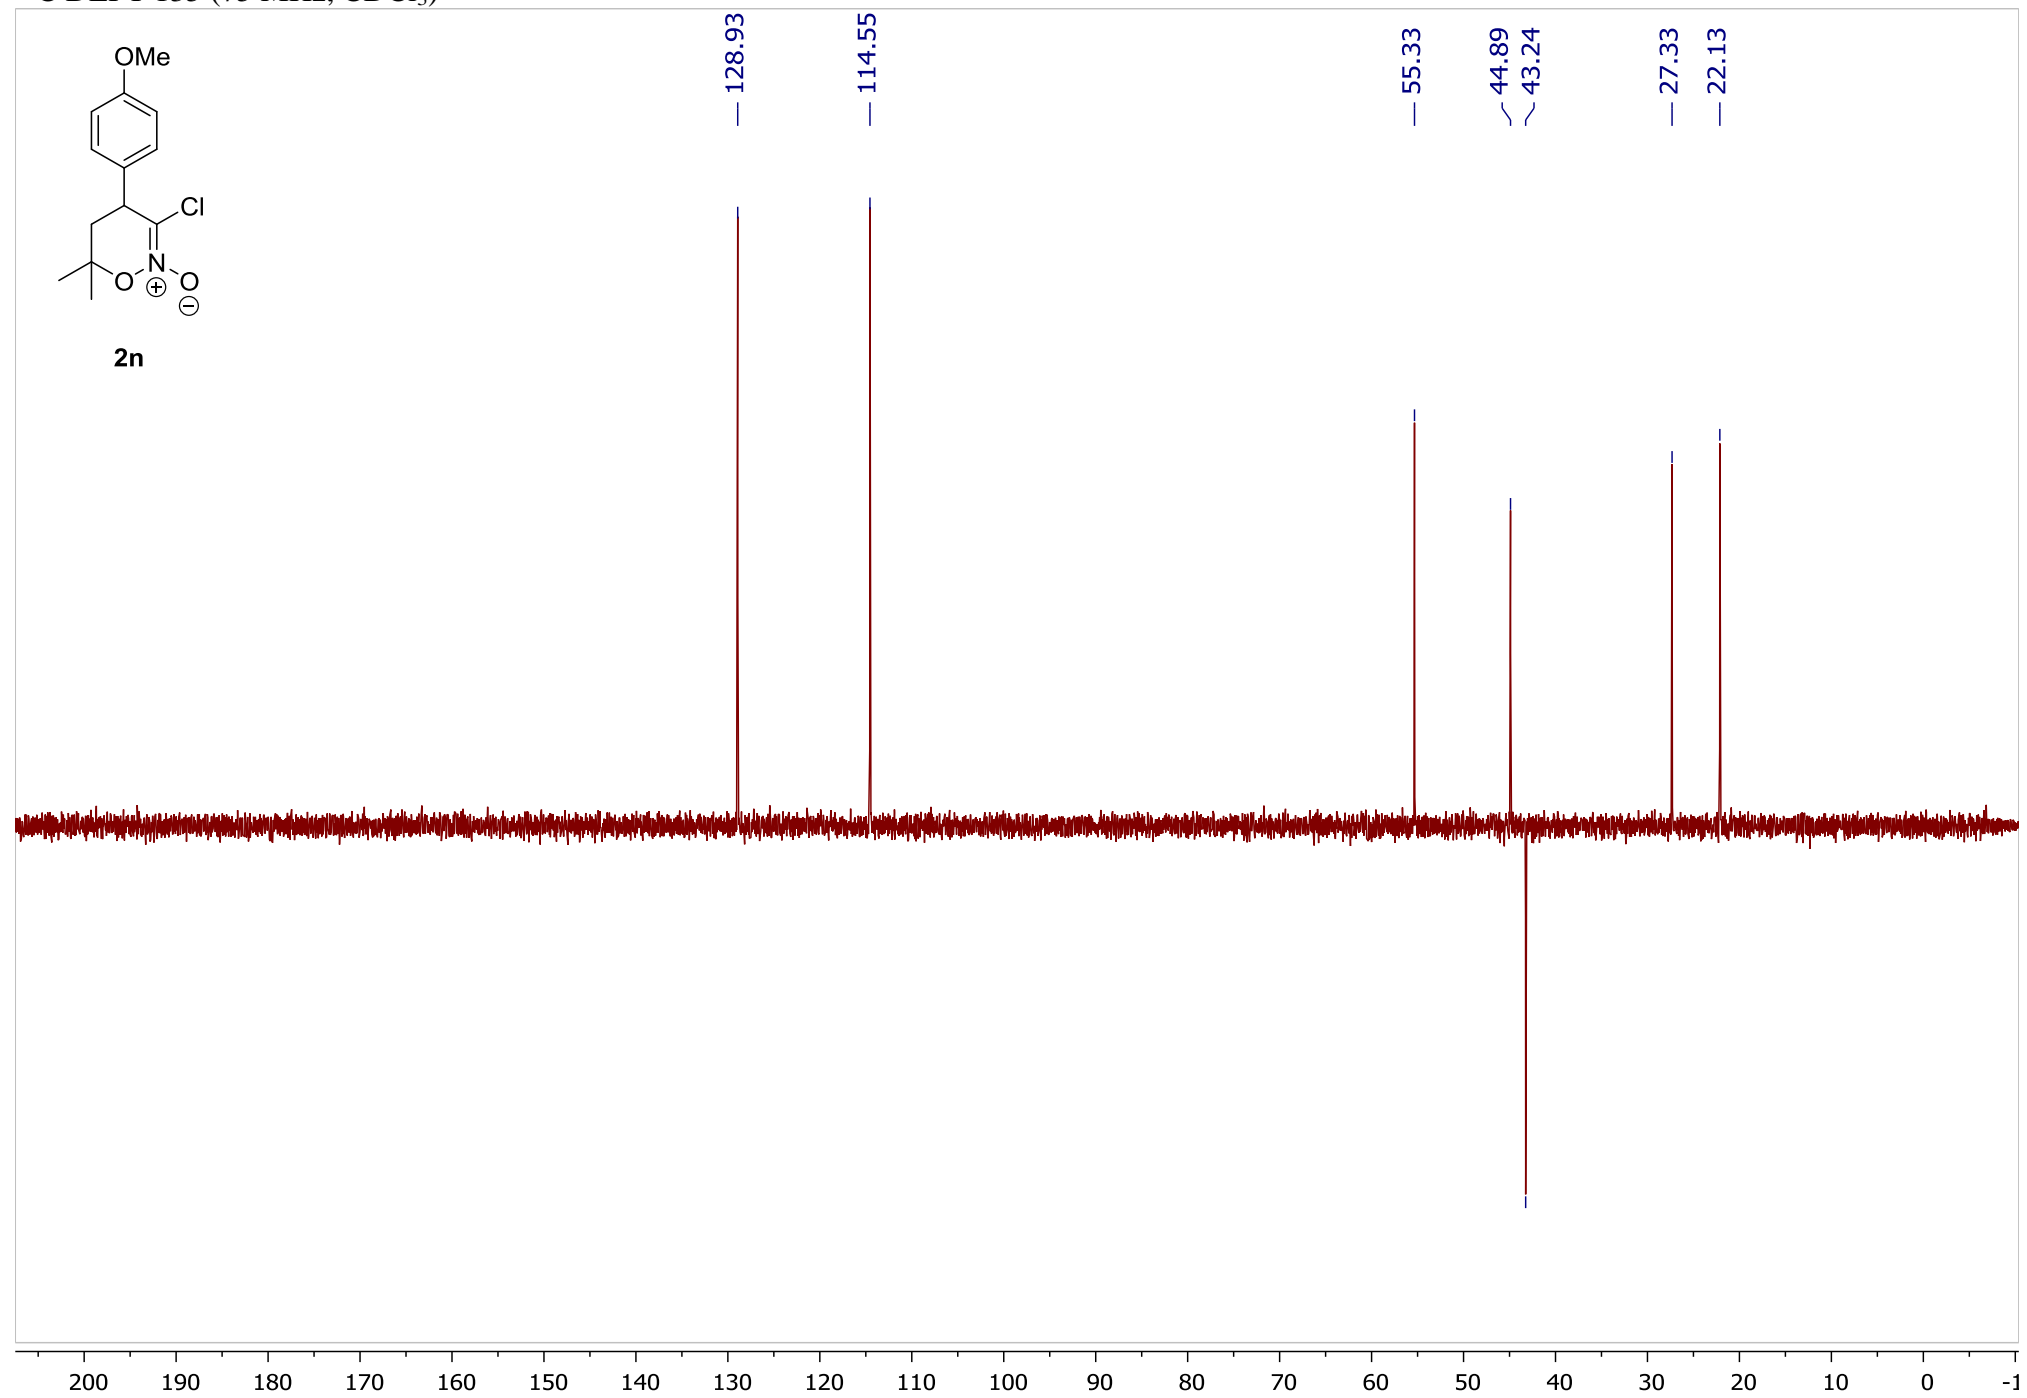

**3-Bromo-4-(4-methoxyphenyl)-6-phenyl-5,6-dihydro-4H-1,2-oxazine 2-oxide 2o, (4S\*,6S\*)-isomer**

<sup>1</sup>H NMR (300 MHz, CDCl<sub>3</sub>)

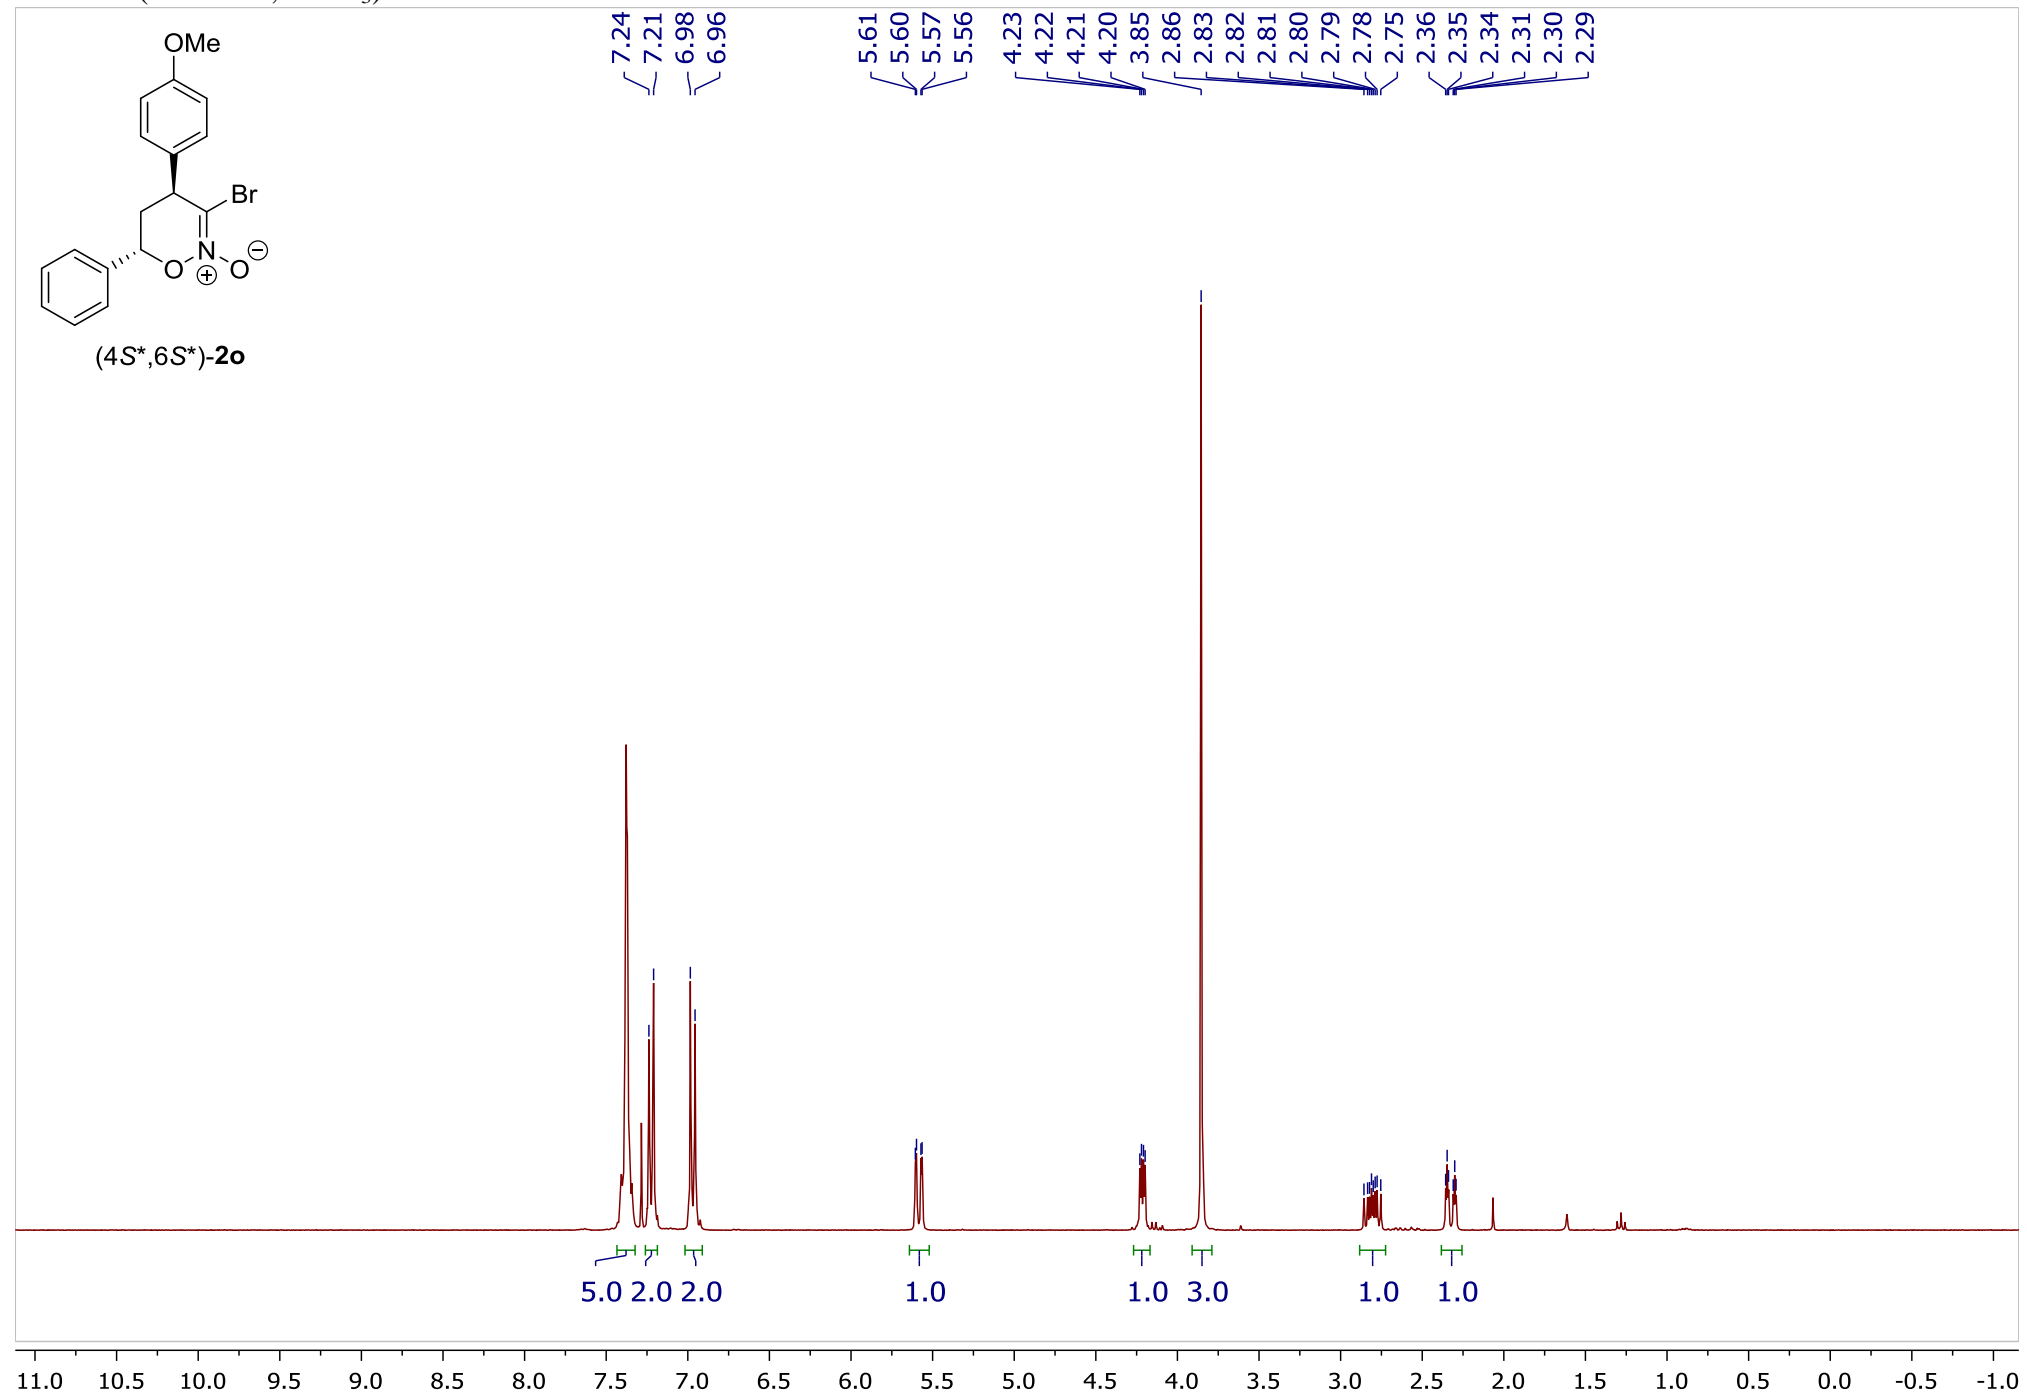

$^{13}\text{C}\{^1\text{H}\}$  NMR (75 MHz,  $\text{CDCl}_3$ )

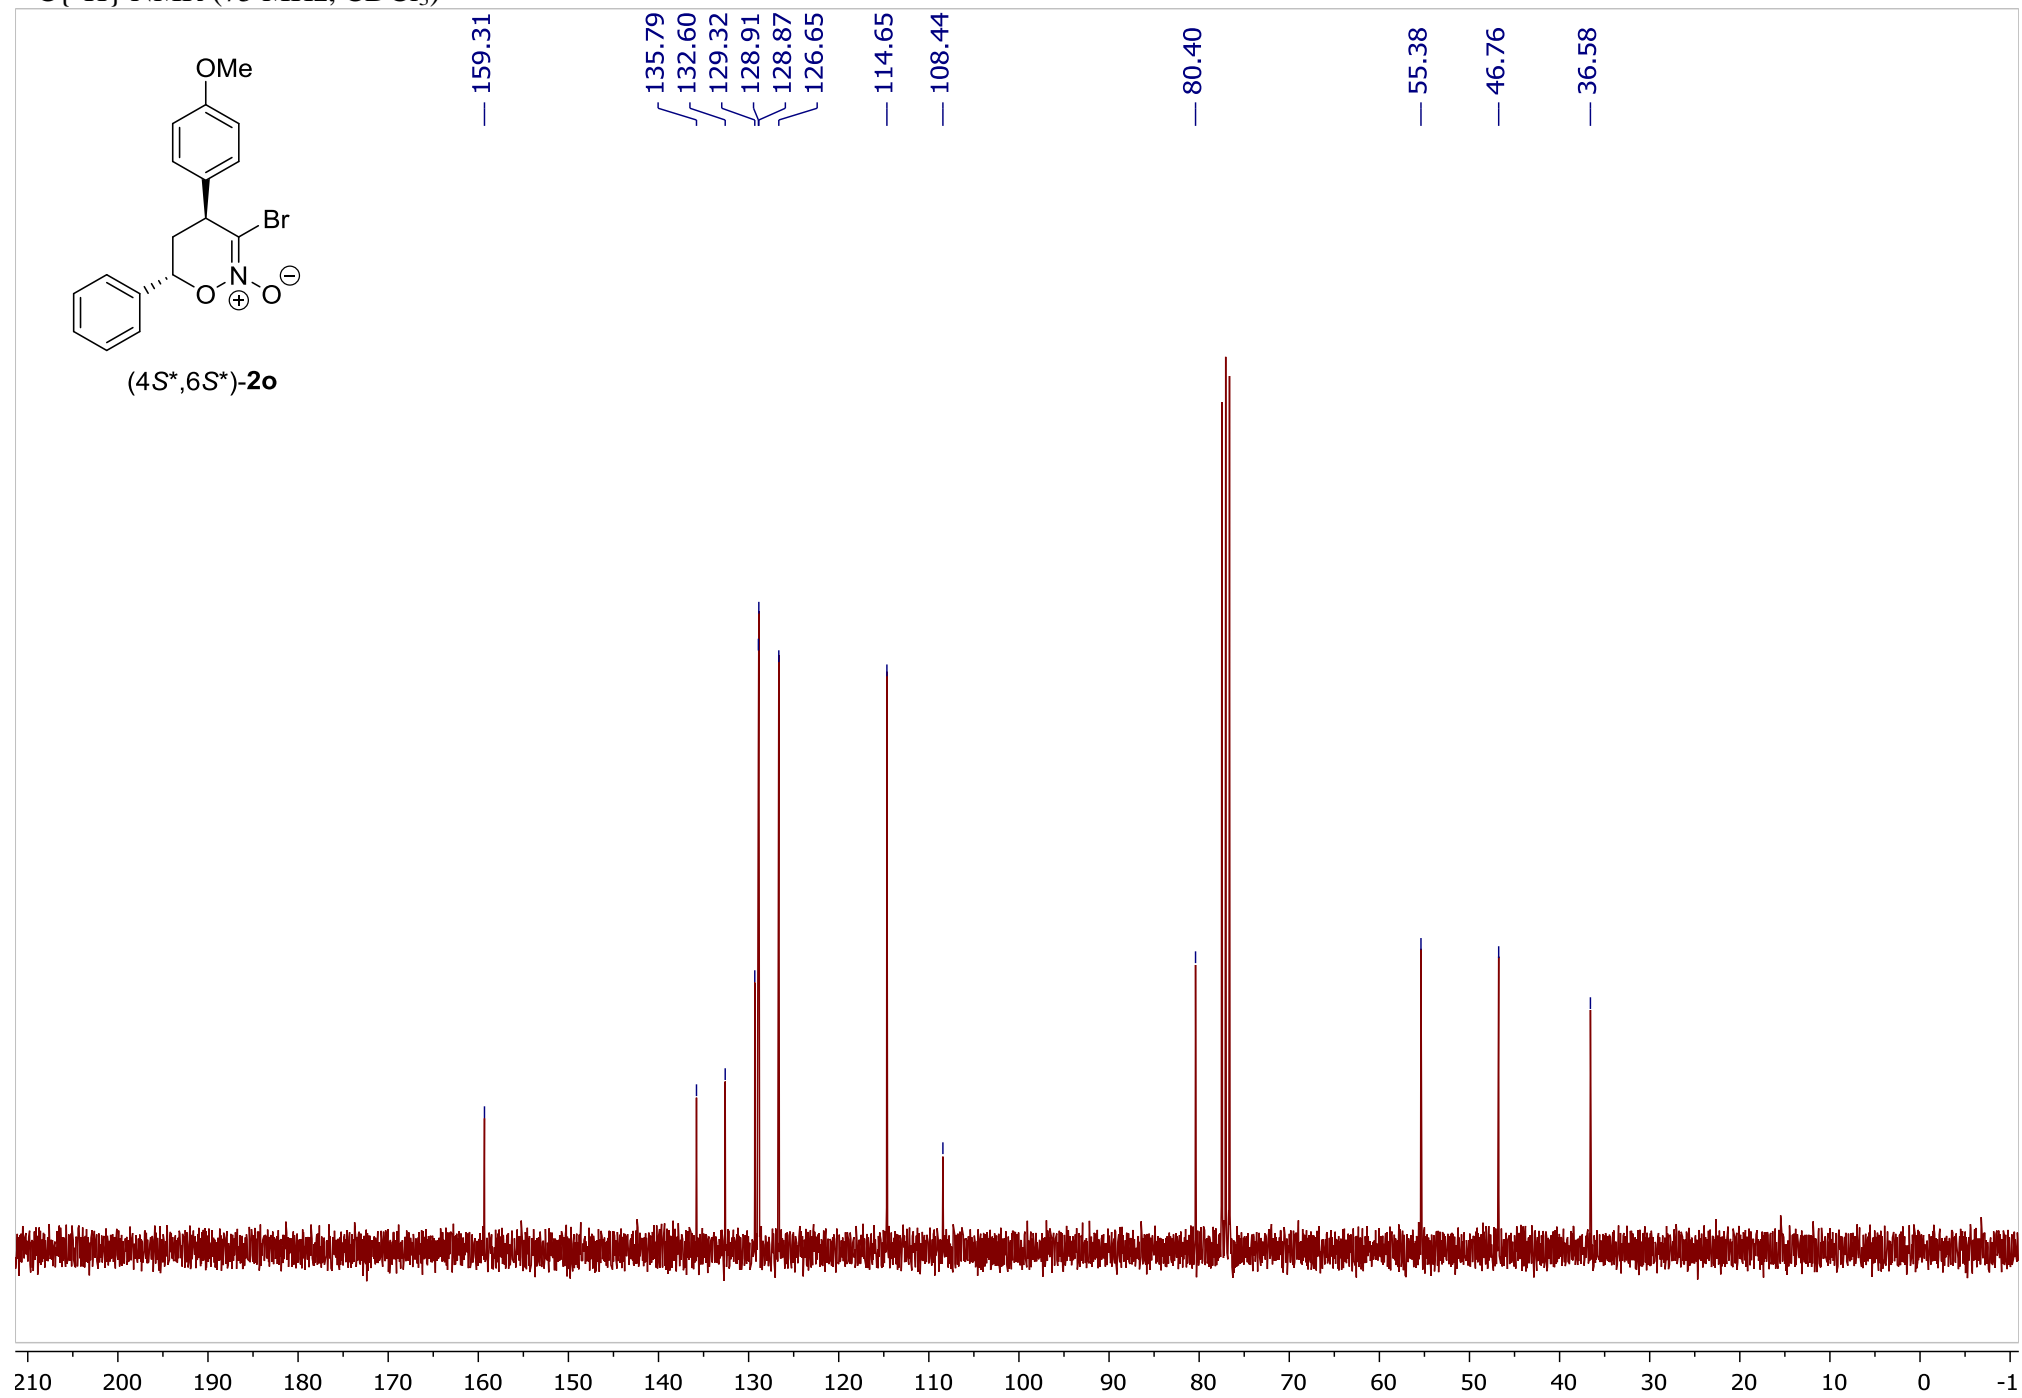



$^{13}\text{C}$  DEPT 135 (75 MHz,  $\text{CDCl}_3$ )

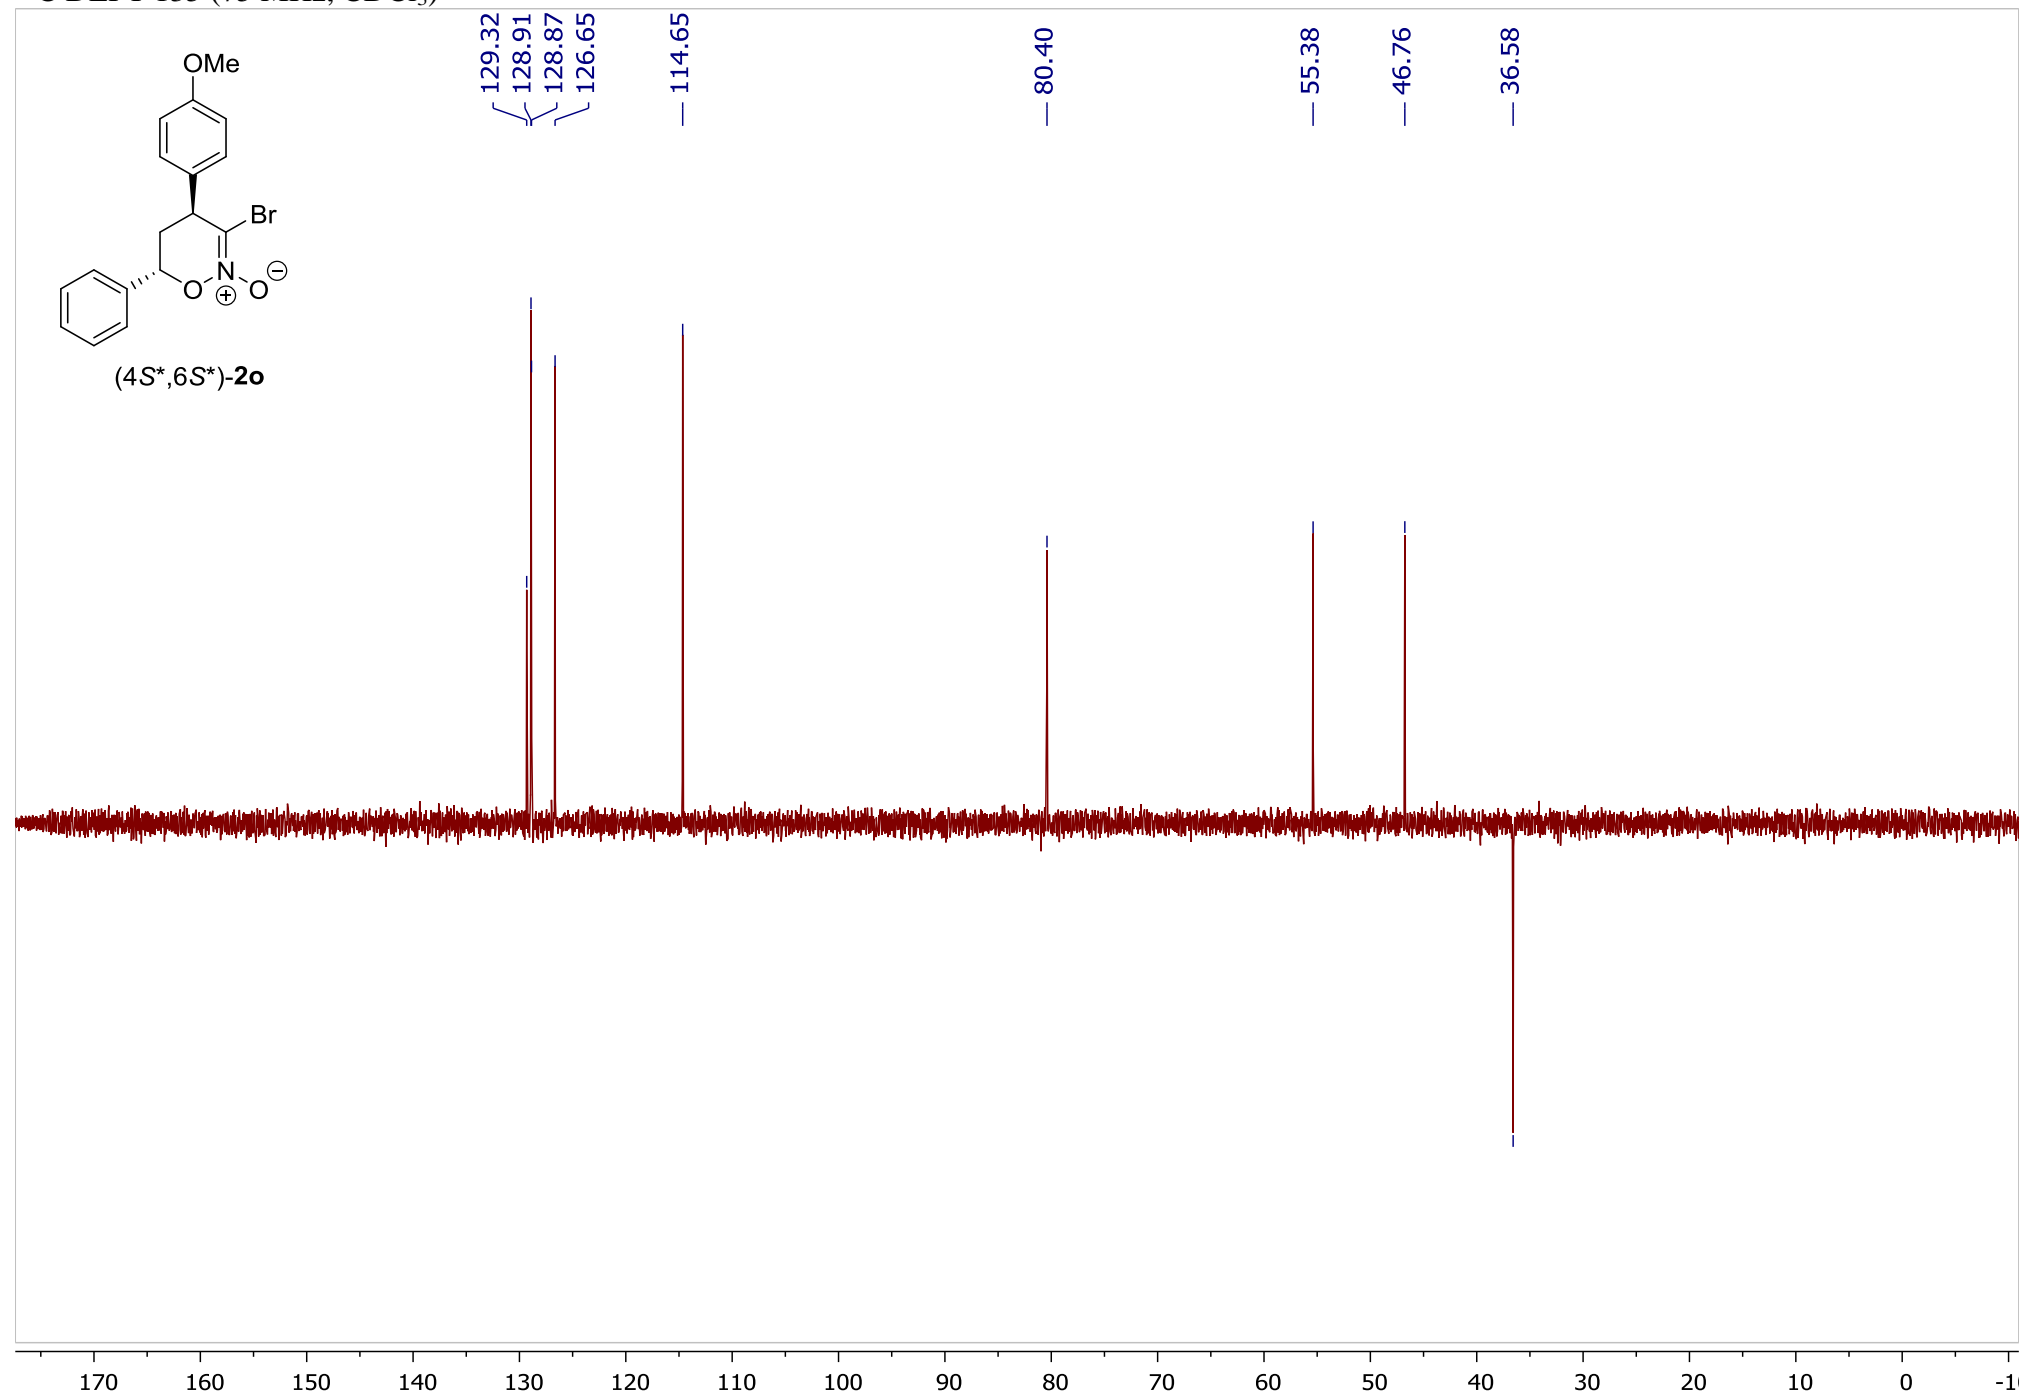

**3-Bromo-4-(4-methoxyphenyl)-6-phenyl-5,6-dihydro-4H-1,2-oxazine 2-oxide 2o**, (4*S*<sup>\*</sup>,6*S*<sup>\*</sup>)-isomer : (4*S*<sup>\*</sup>,6*R*<sup>\*</sup>)-isomer = 1.1 : 1.

<sup>1</sup>H NMR (300 MHz, CDCl<sub>3</sub>)

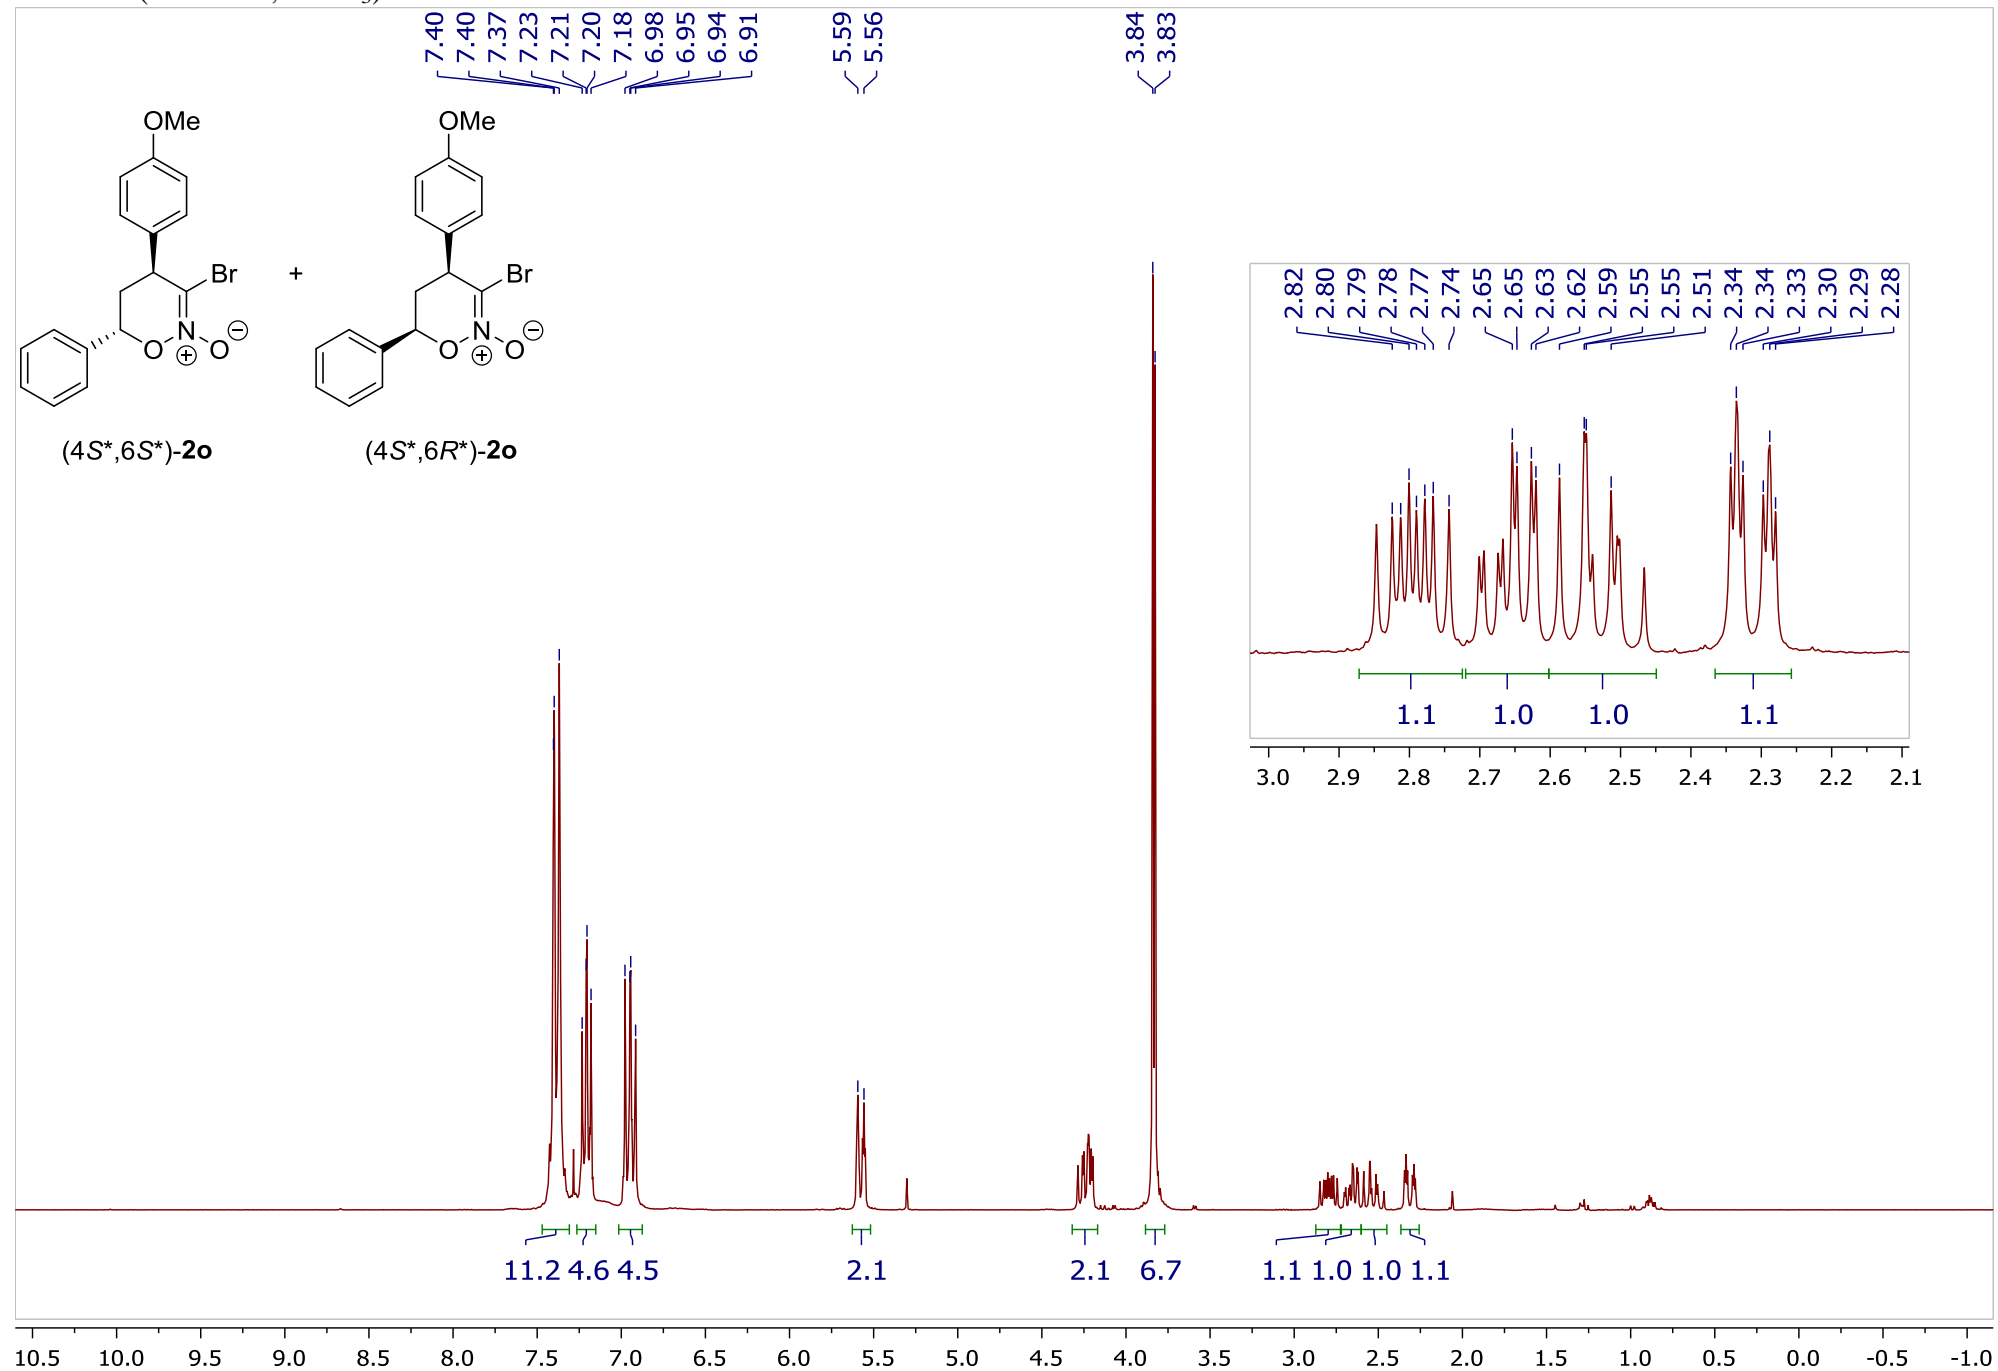

$^{13}\text{C}\{^1\text{H}\}$  NMR (75 MHz,  $\text{CDCl}_3$ )

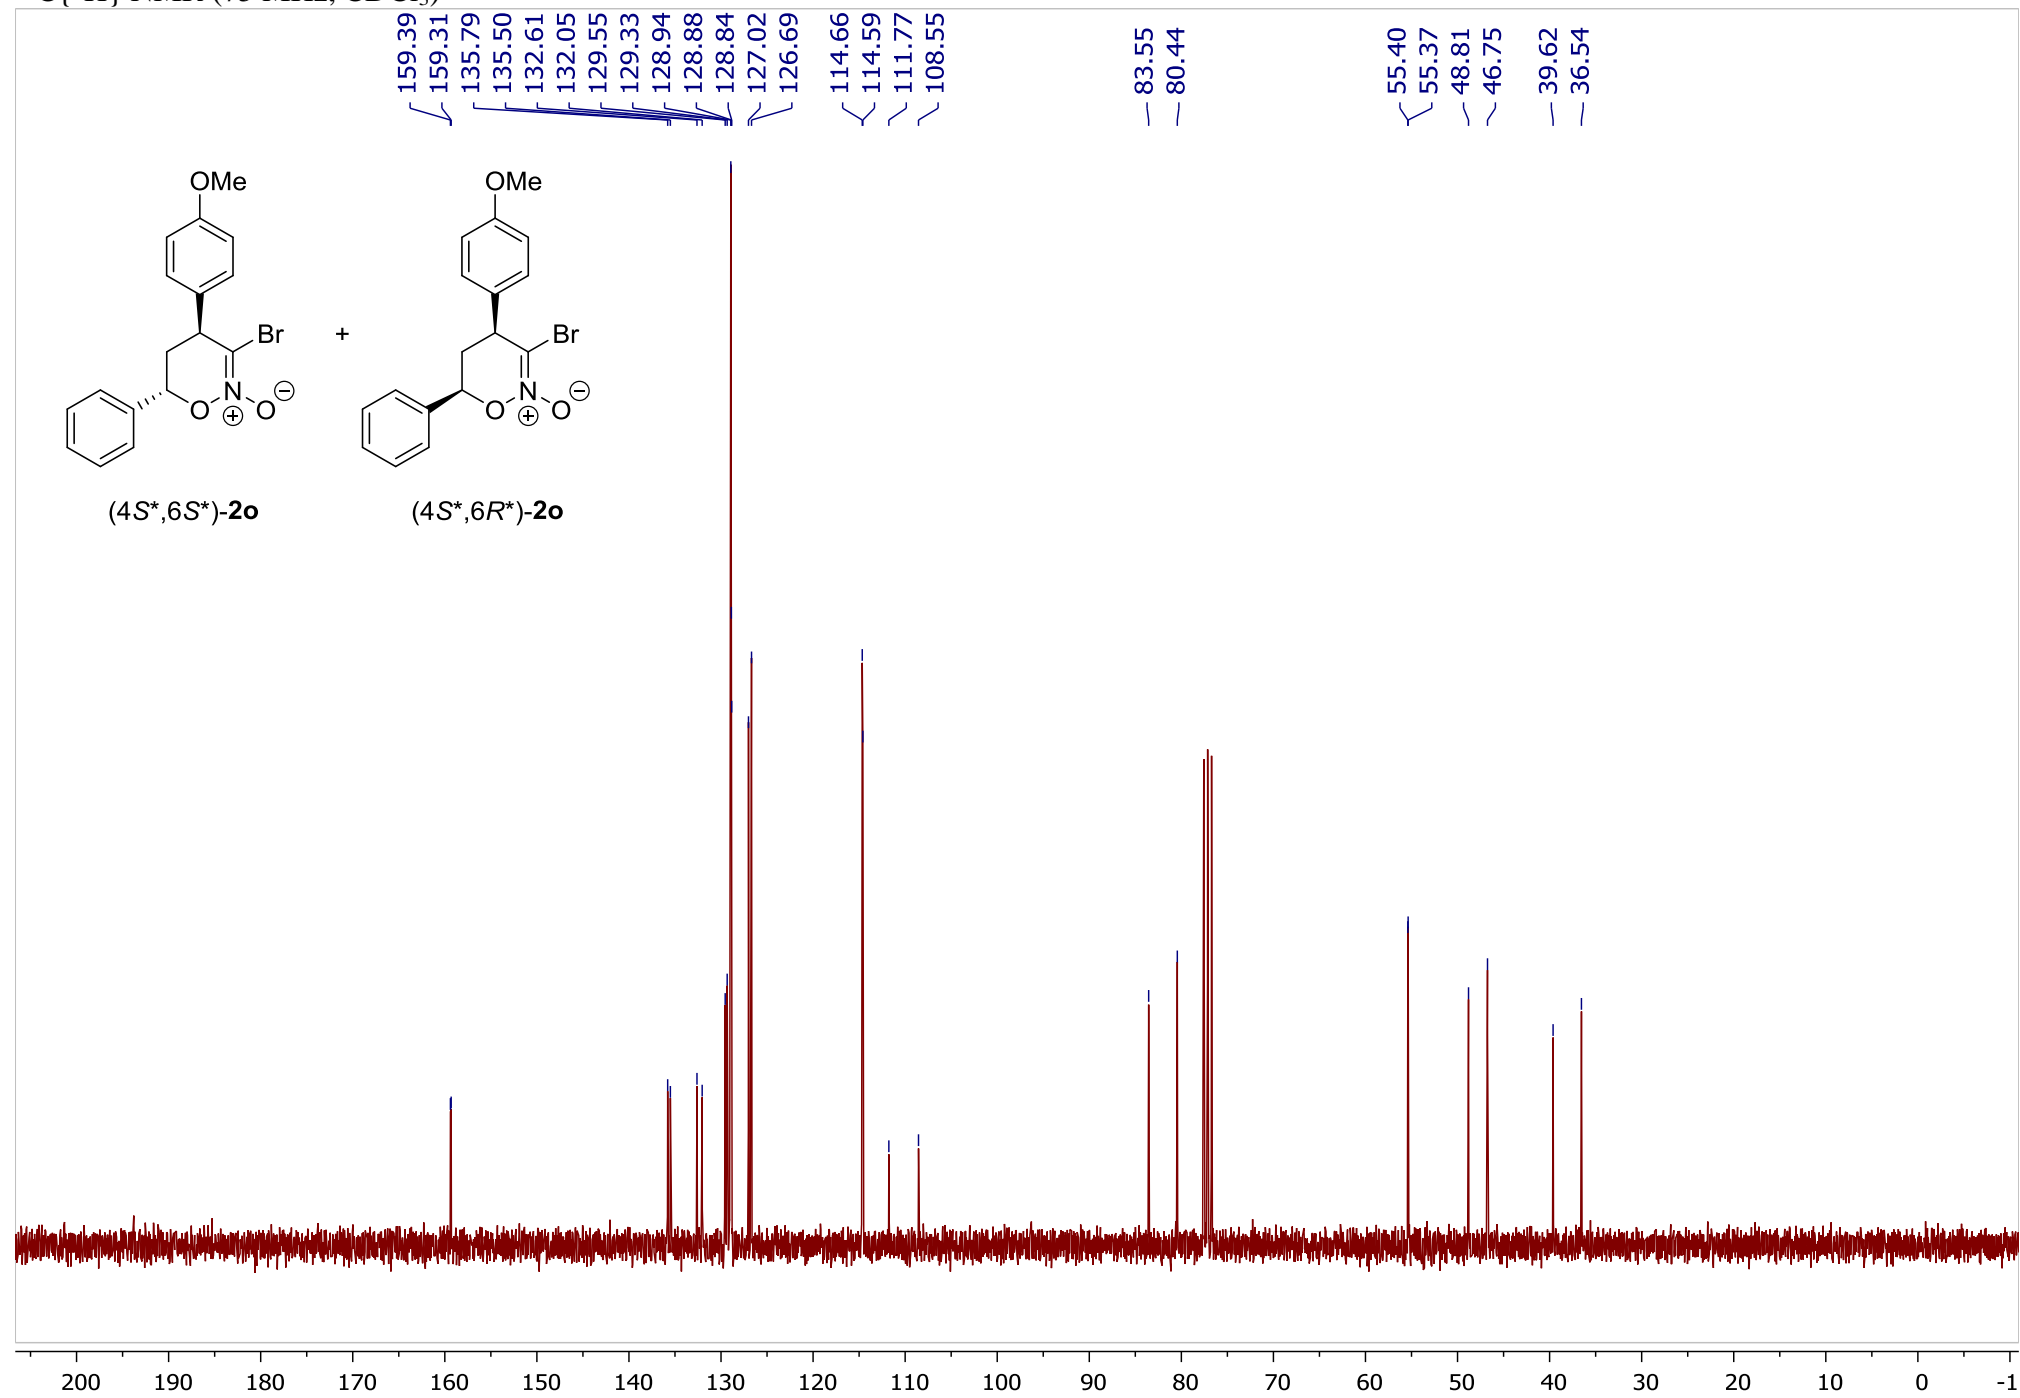

$^{13}\text{C}$  DEPT 135 (75 MHz,  $\text{CDCl}_3$ )

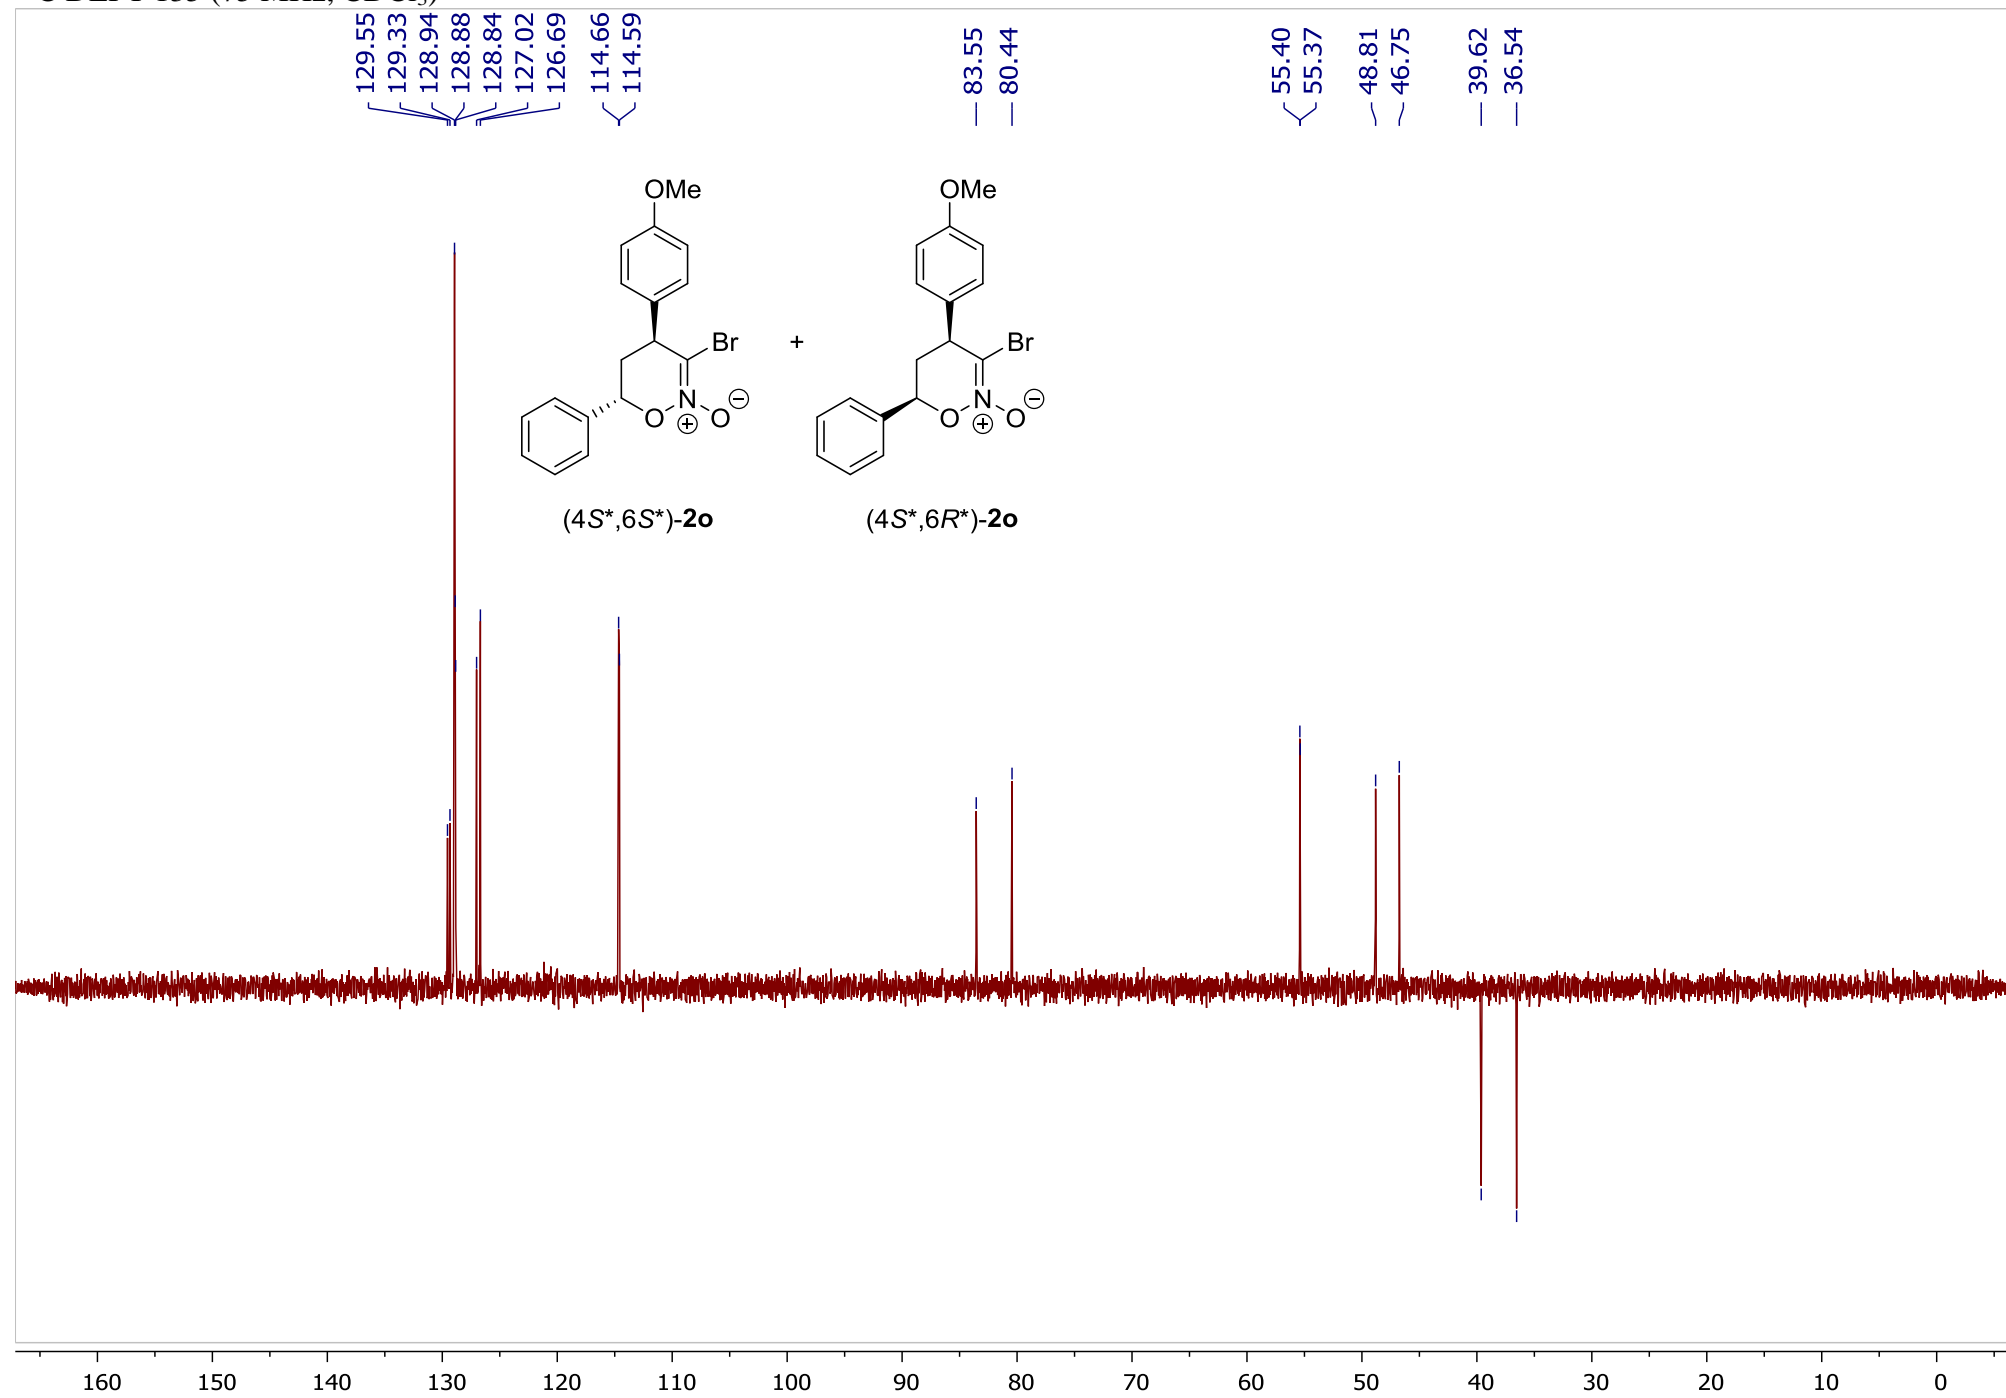

**(4*S*\*,4*aR*\*,7*aR*\*)-3-Bromo-4-(4-methoxyphenyl)-4,4*a*,5,6,7,7*a*-hexahydrocyclopenta[*e*][1,2]oxazine 2-oxide 2p**

<sup>1</sup>H NMR (300 MHz, CDCl<sub>3</sub>)

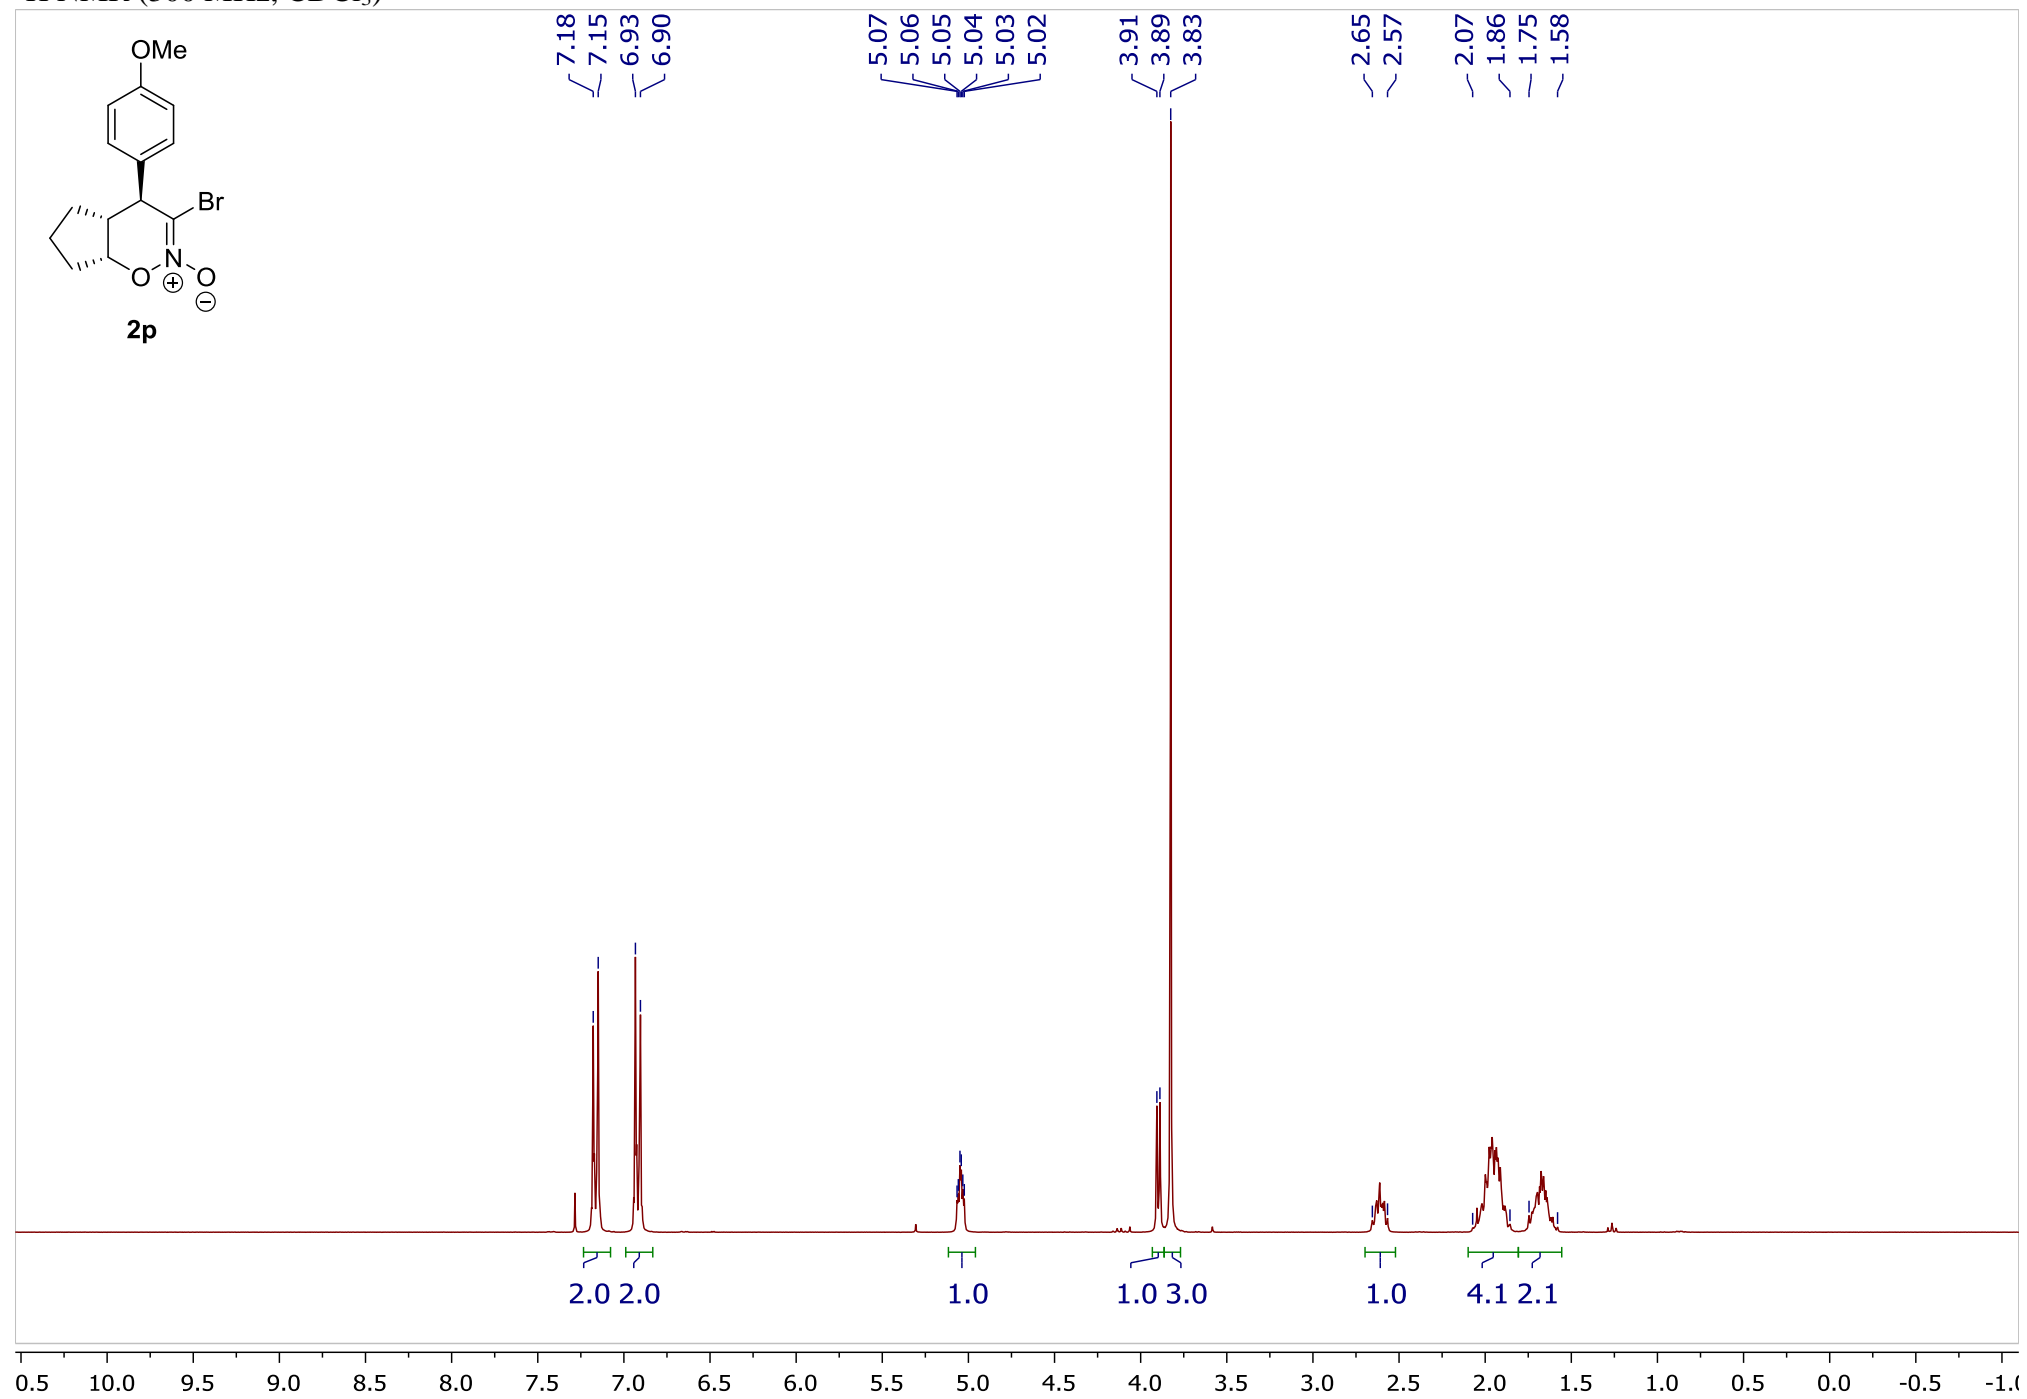

$^{13}\text{C}\{^1\text{H}\}$  NMR (75 MHz,  $\text{CDCl}_3$ )

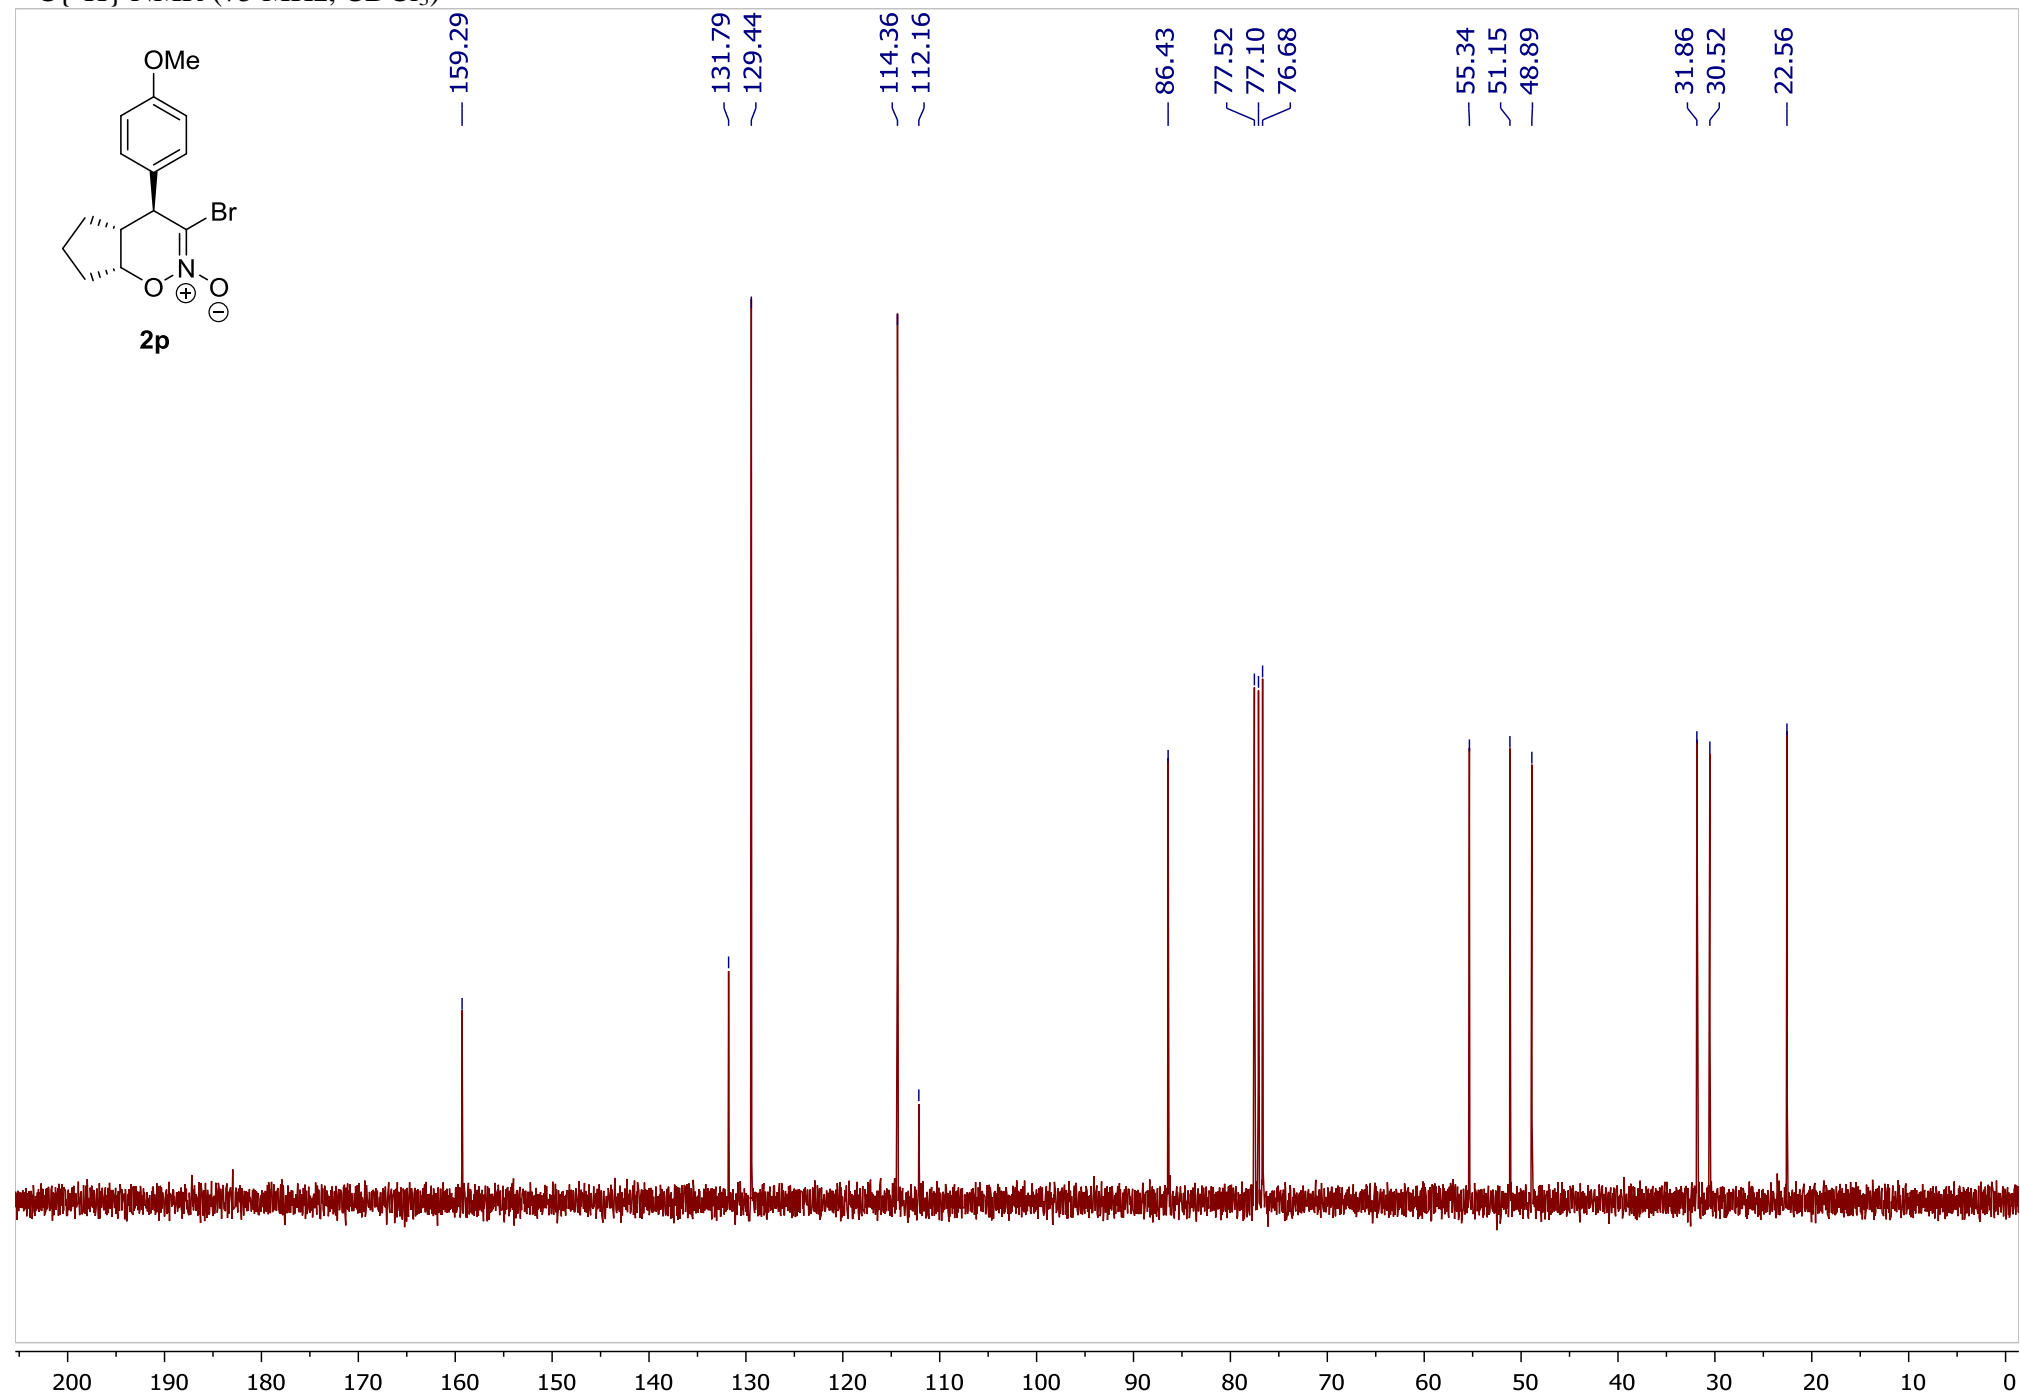

$^{13}\text{C}$  DEPT 135 (75 MHz,  $\text{CDCl}_3$ )

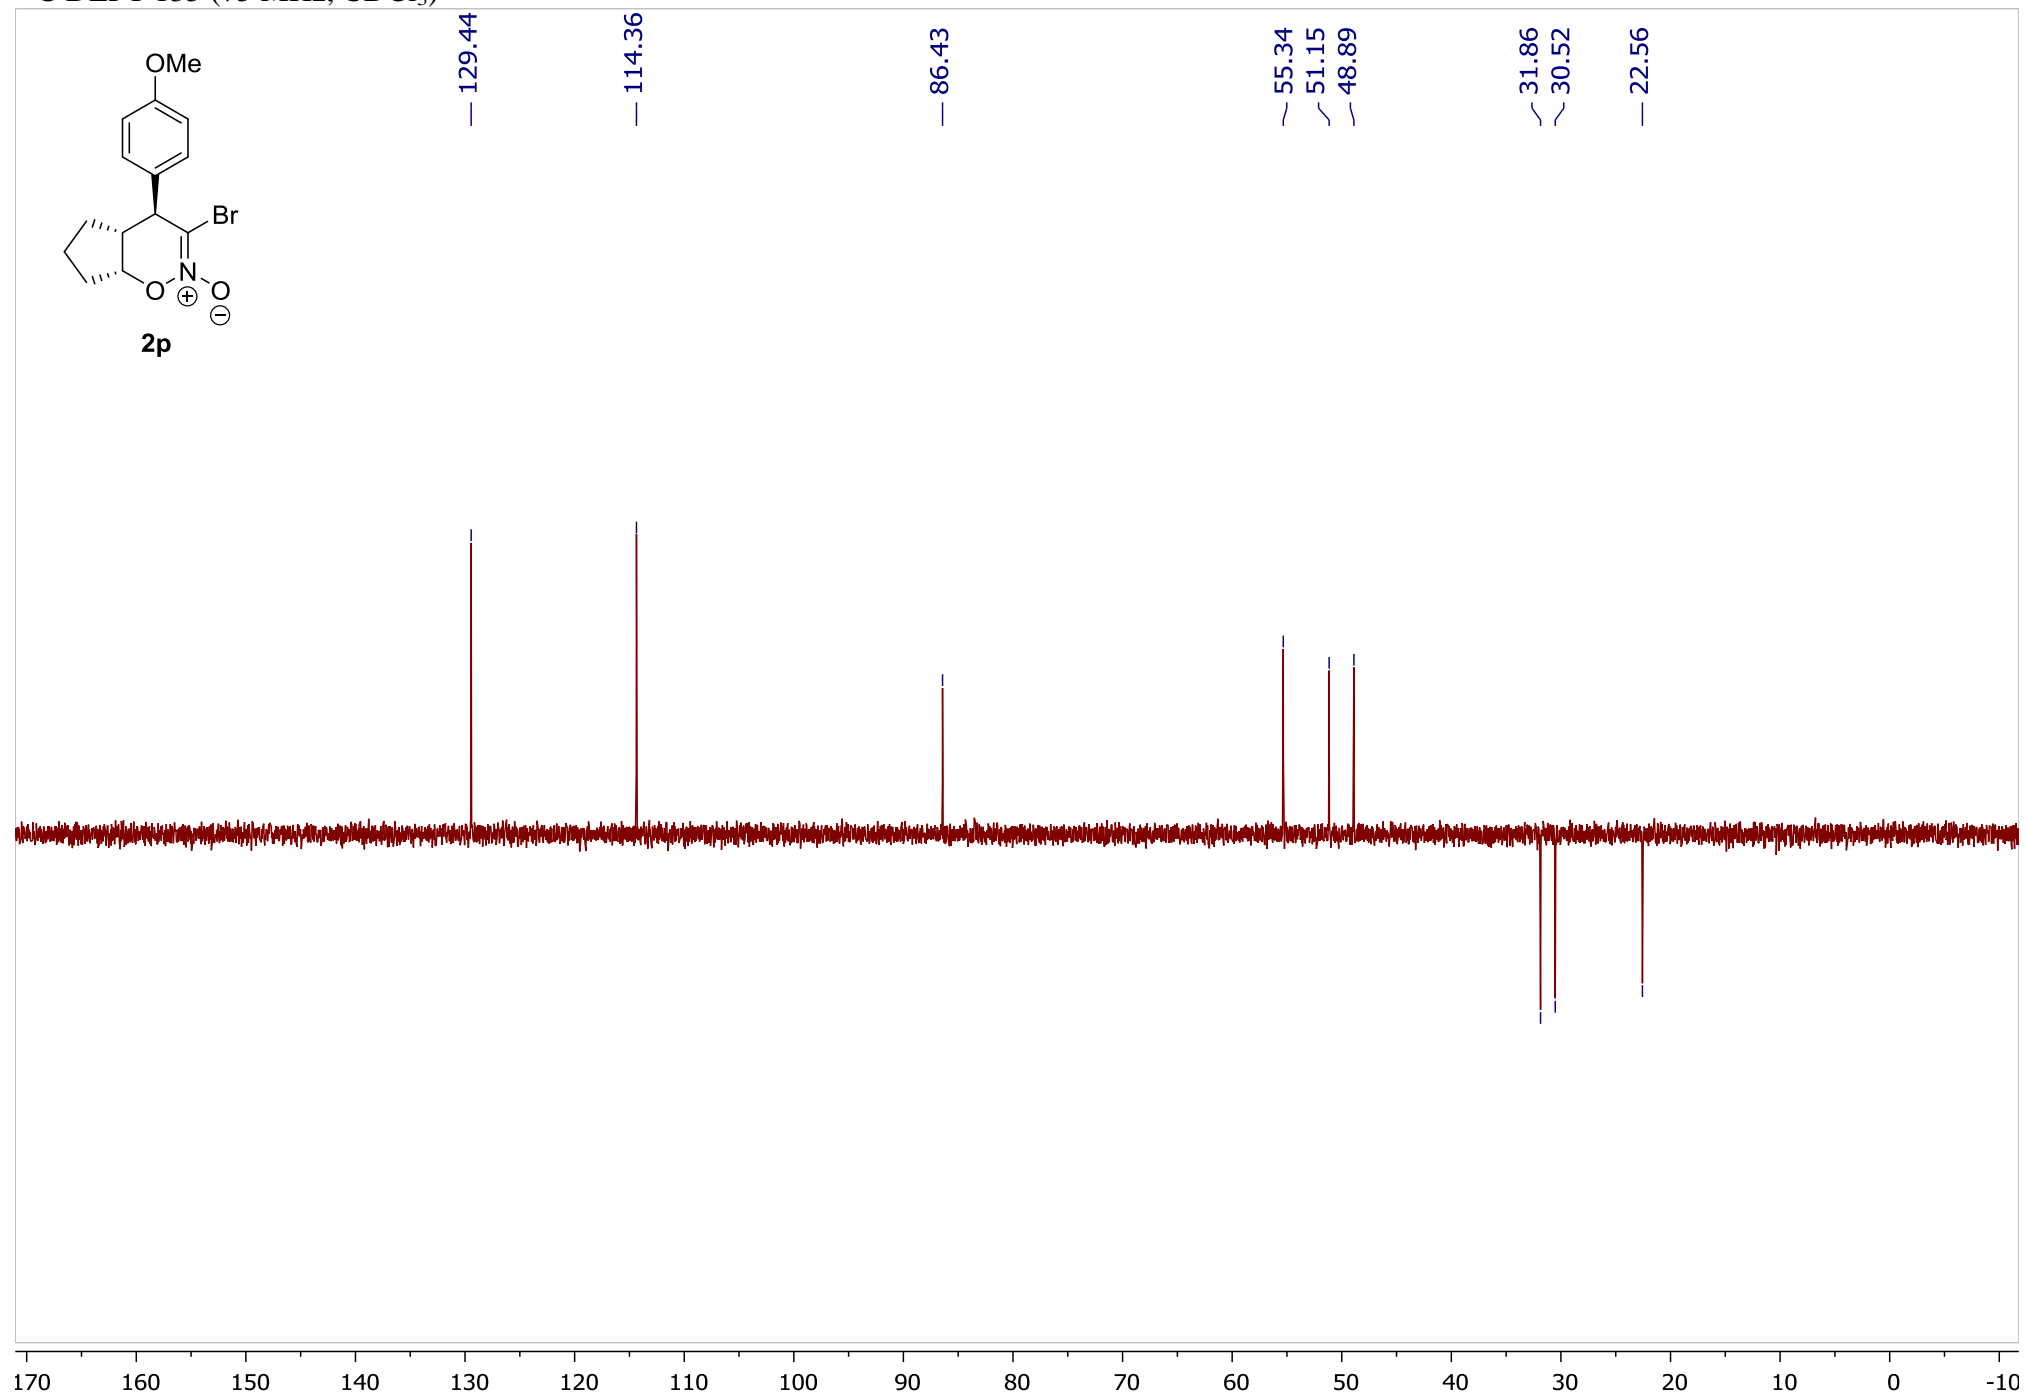

(4*S*\*,4*aR*\*,8*aR*\*)-3-bromo-4-(4-methoxyphenyl)-4a,5,6,7,8,8a-hexahydro-4H-benzo[e][1,2]oxazine 2-oxide 2q

<sup>1</sup>H NMR (300 MHz, CDCl<sub>3</sub>)

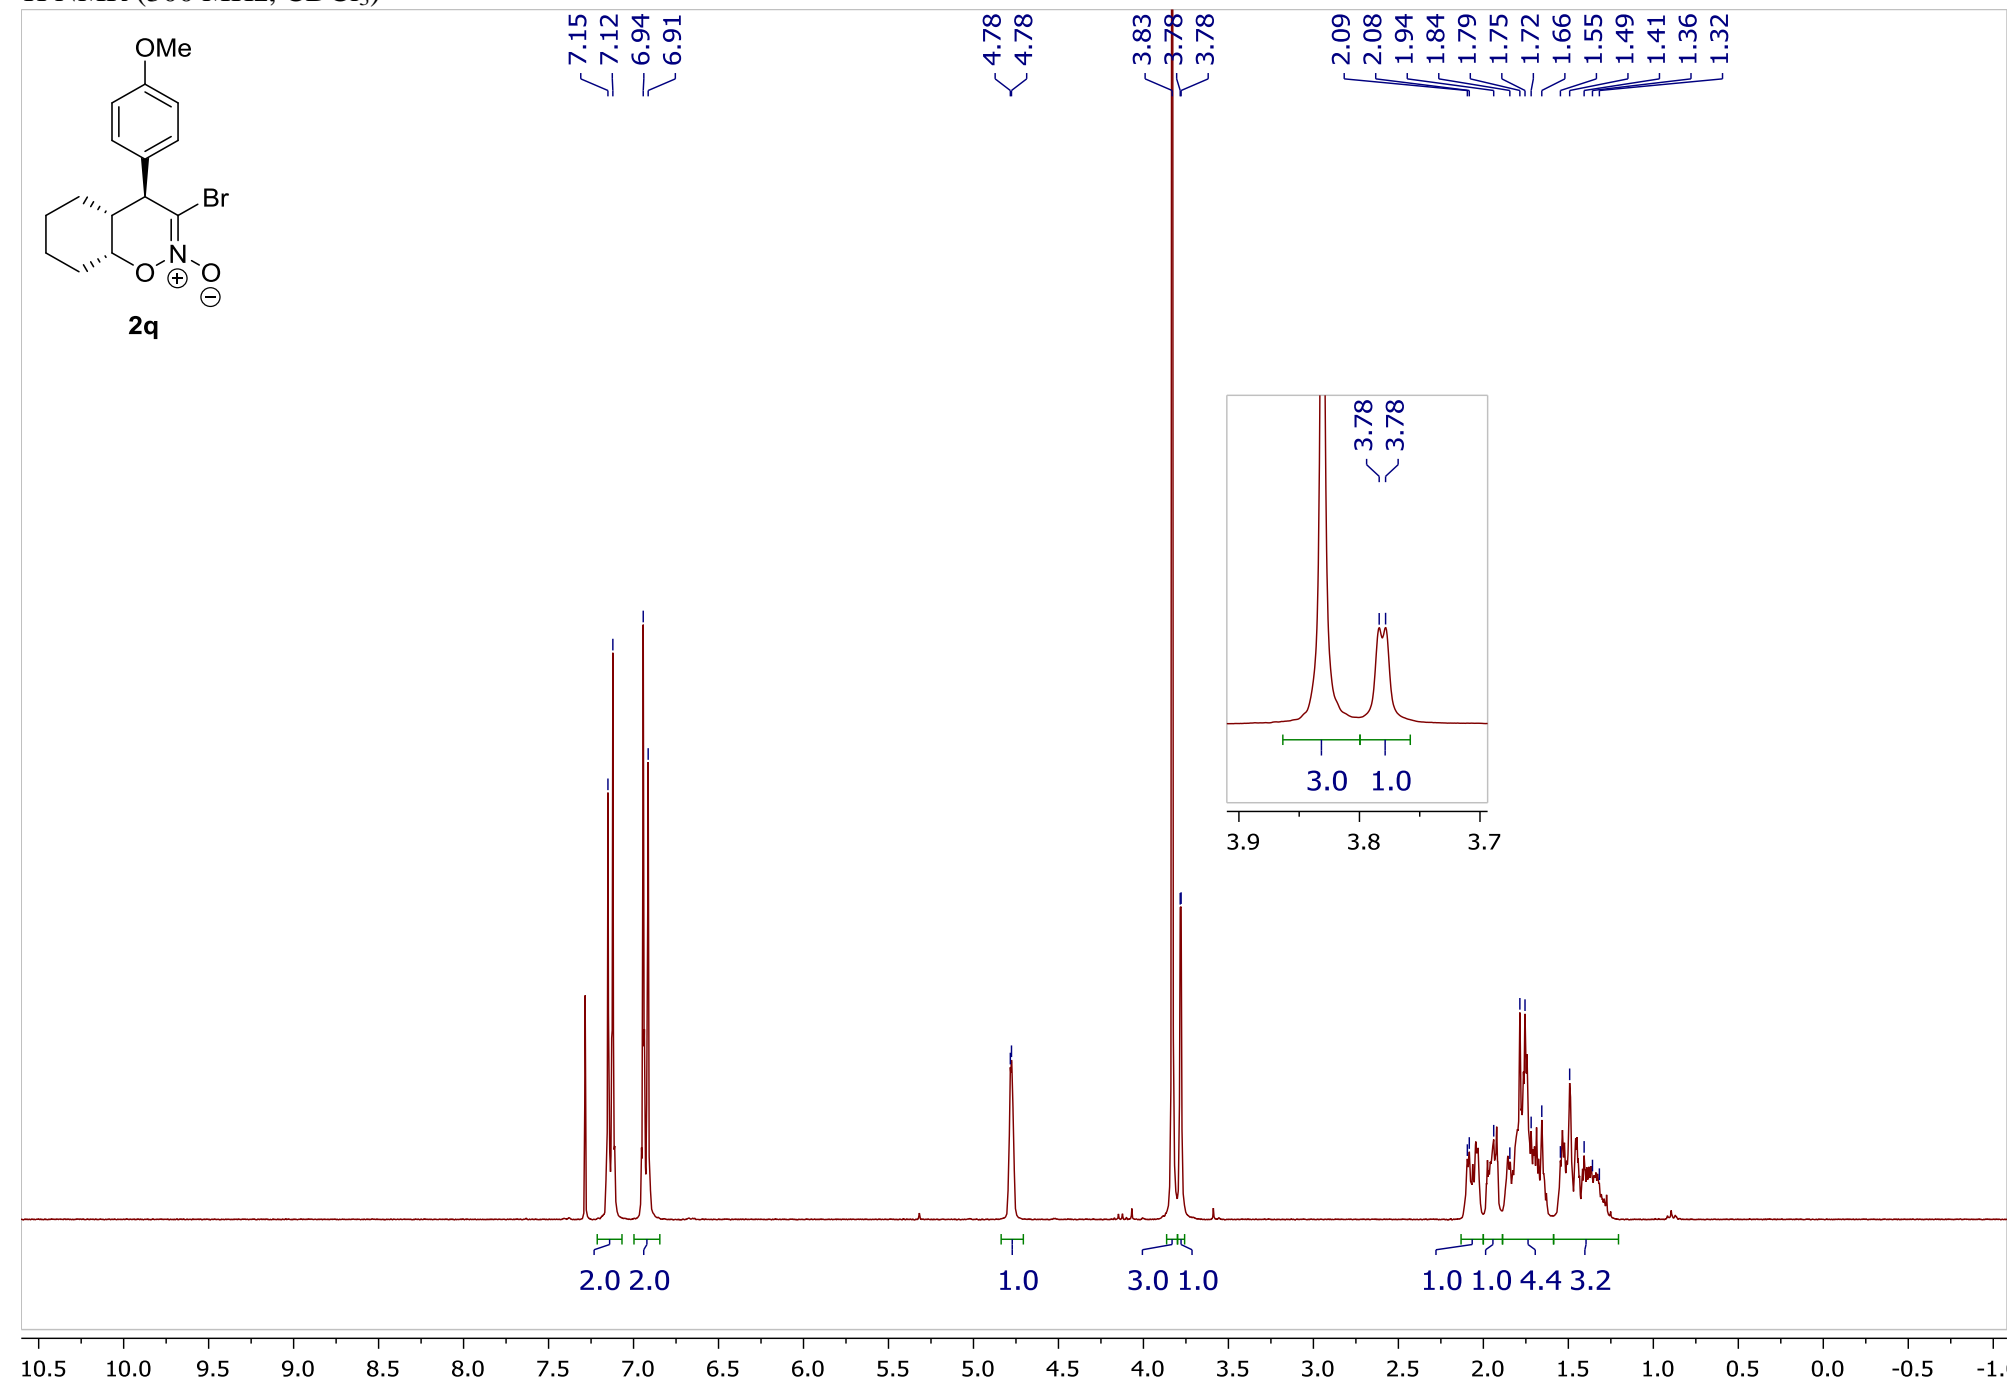



### 3-(1-(4-Methoxyphenyl)vinyl)benzo[d]isoxazole 3aa

$^1\text{H}$  NMR (300 MHz,  $\text{CDCl}_3$ )

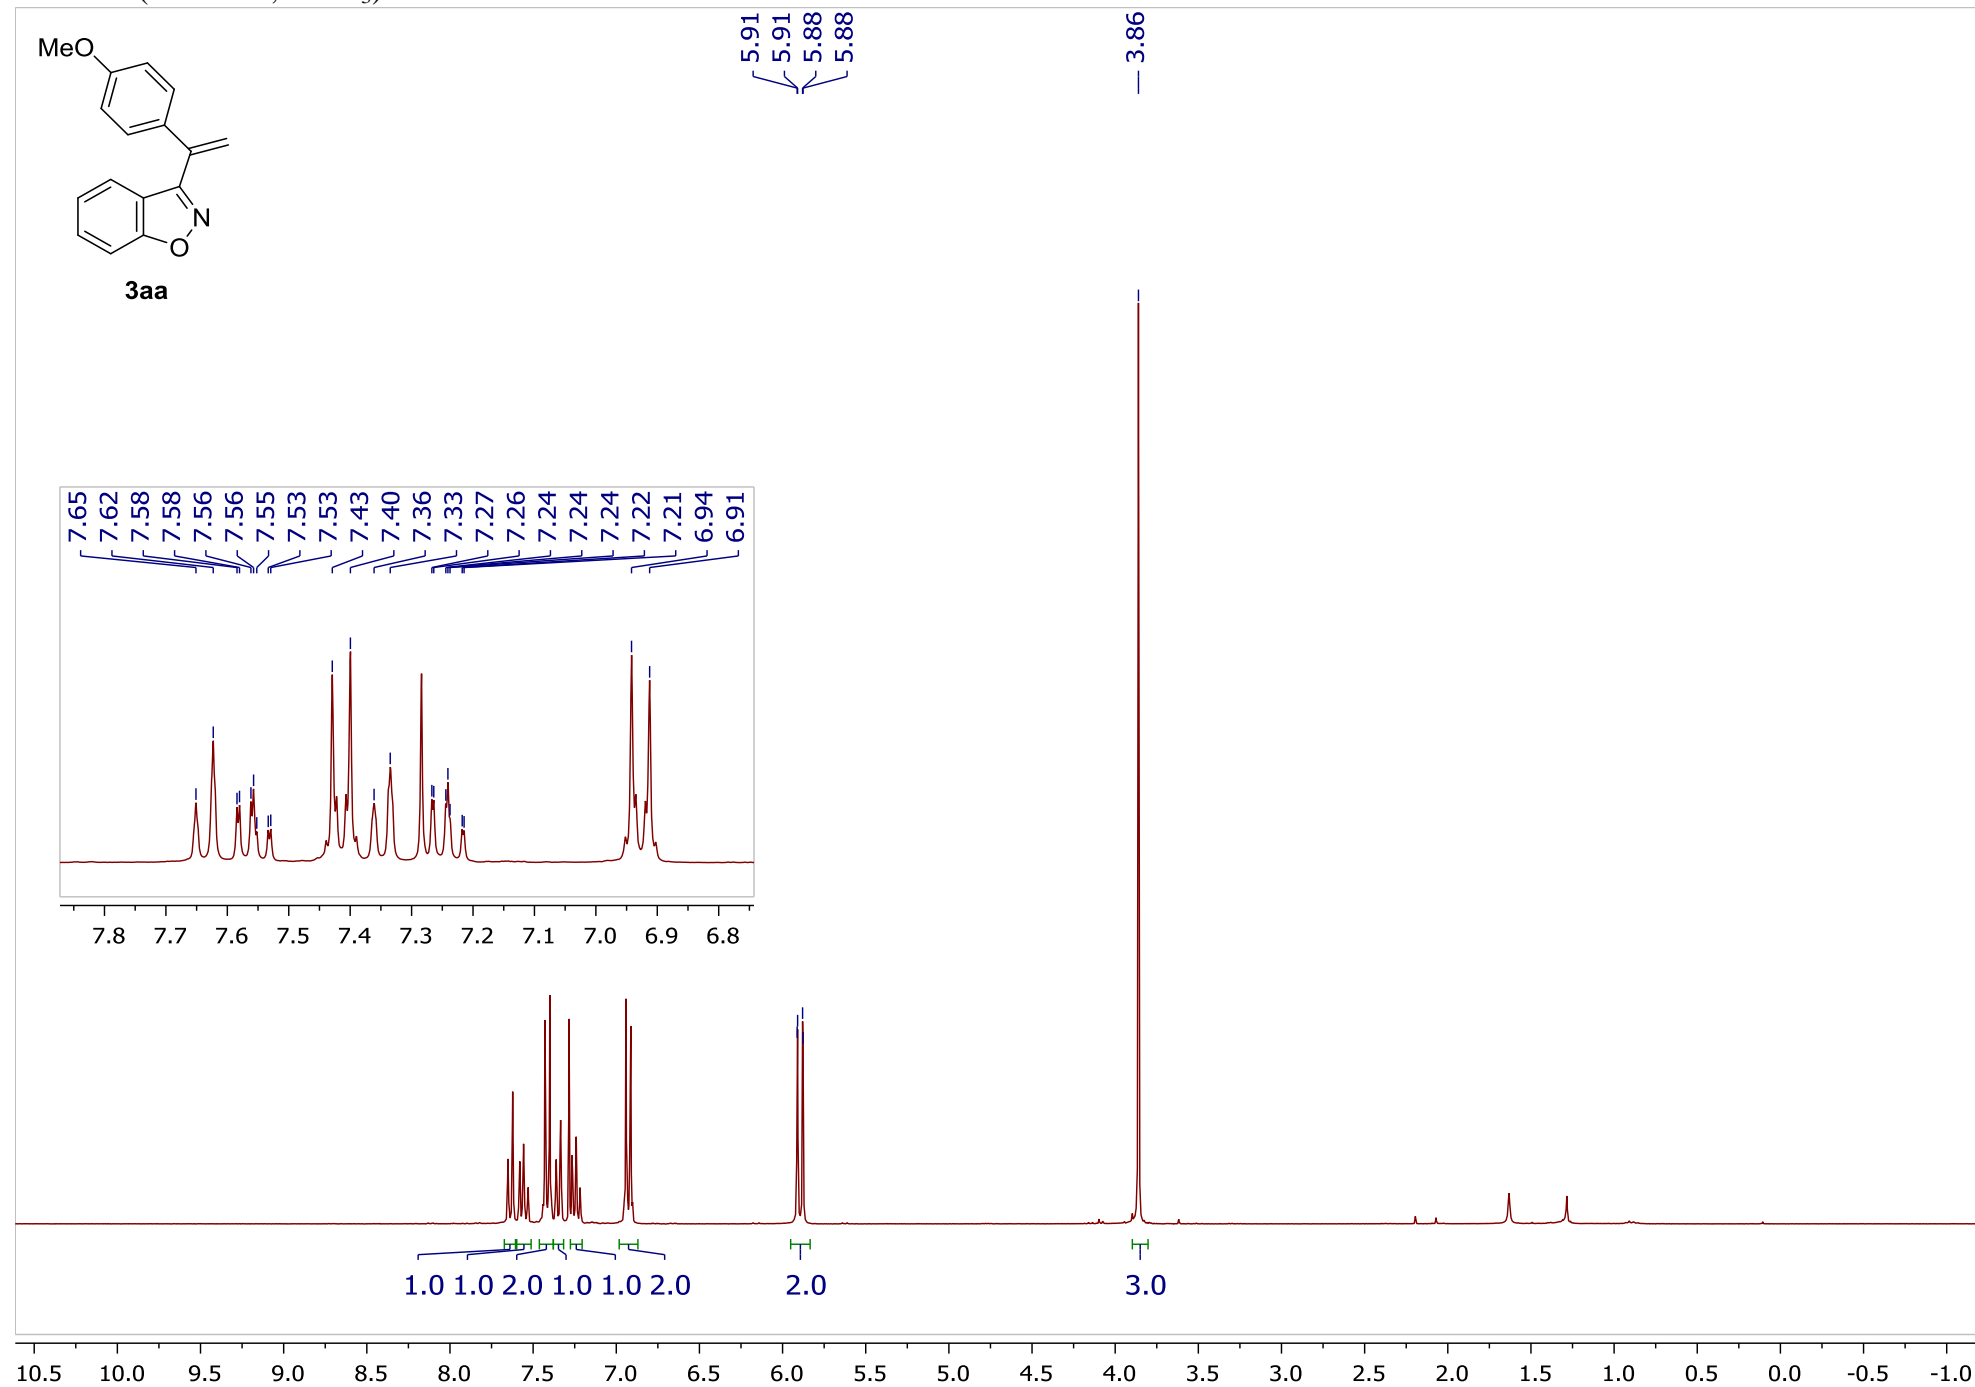

$^{13}\text{C}\{^1\text{H}\}$  NMR (75 MHz,  $\text{CDCl}_3$ )

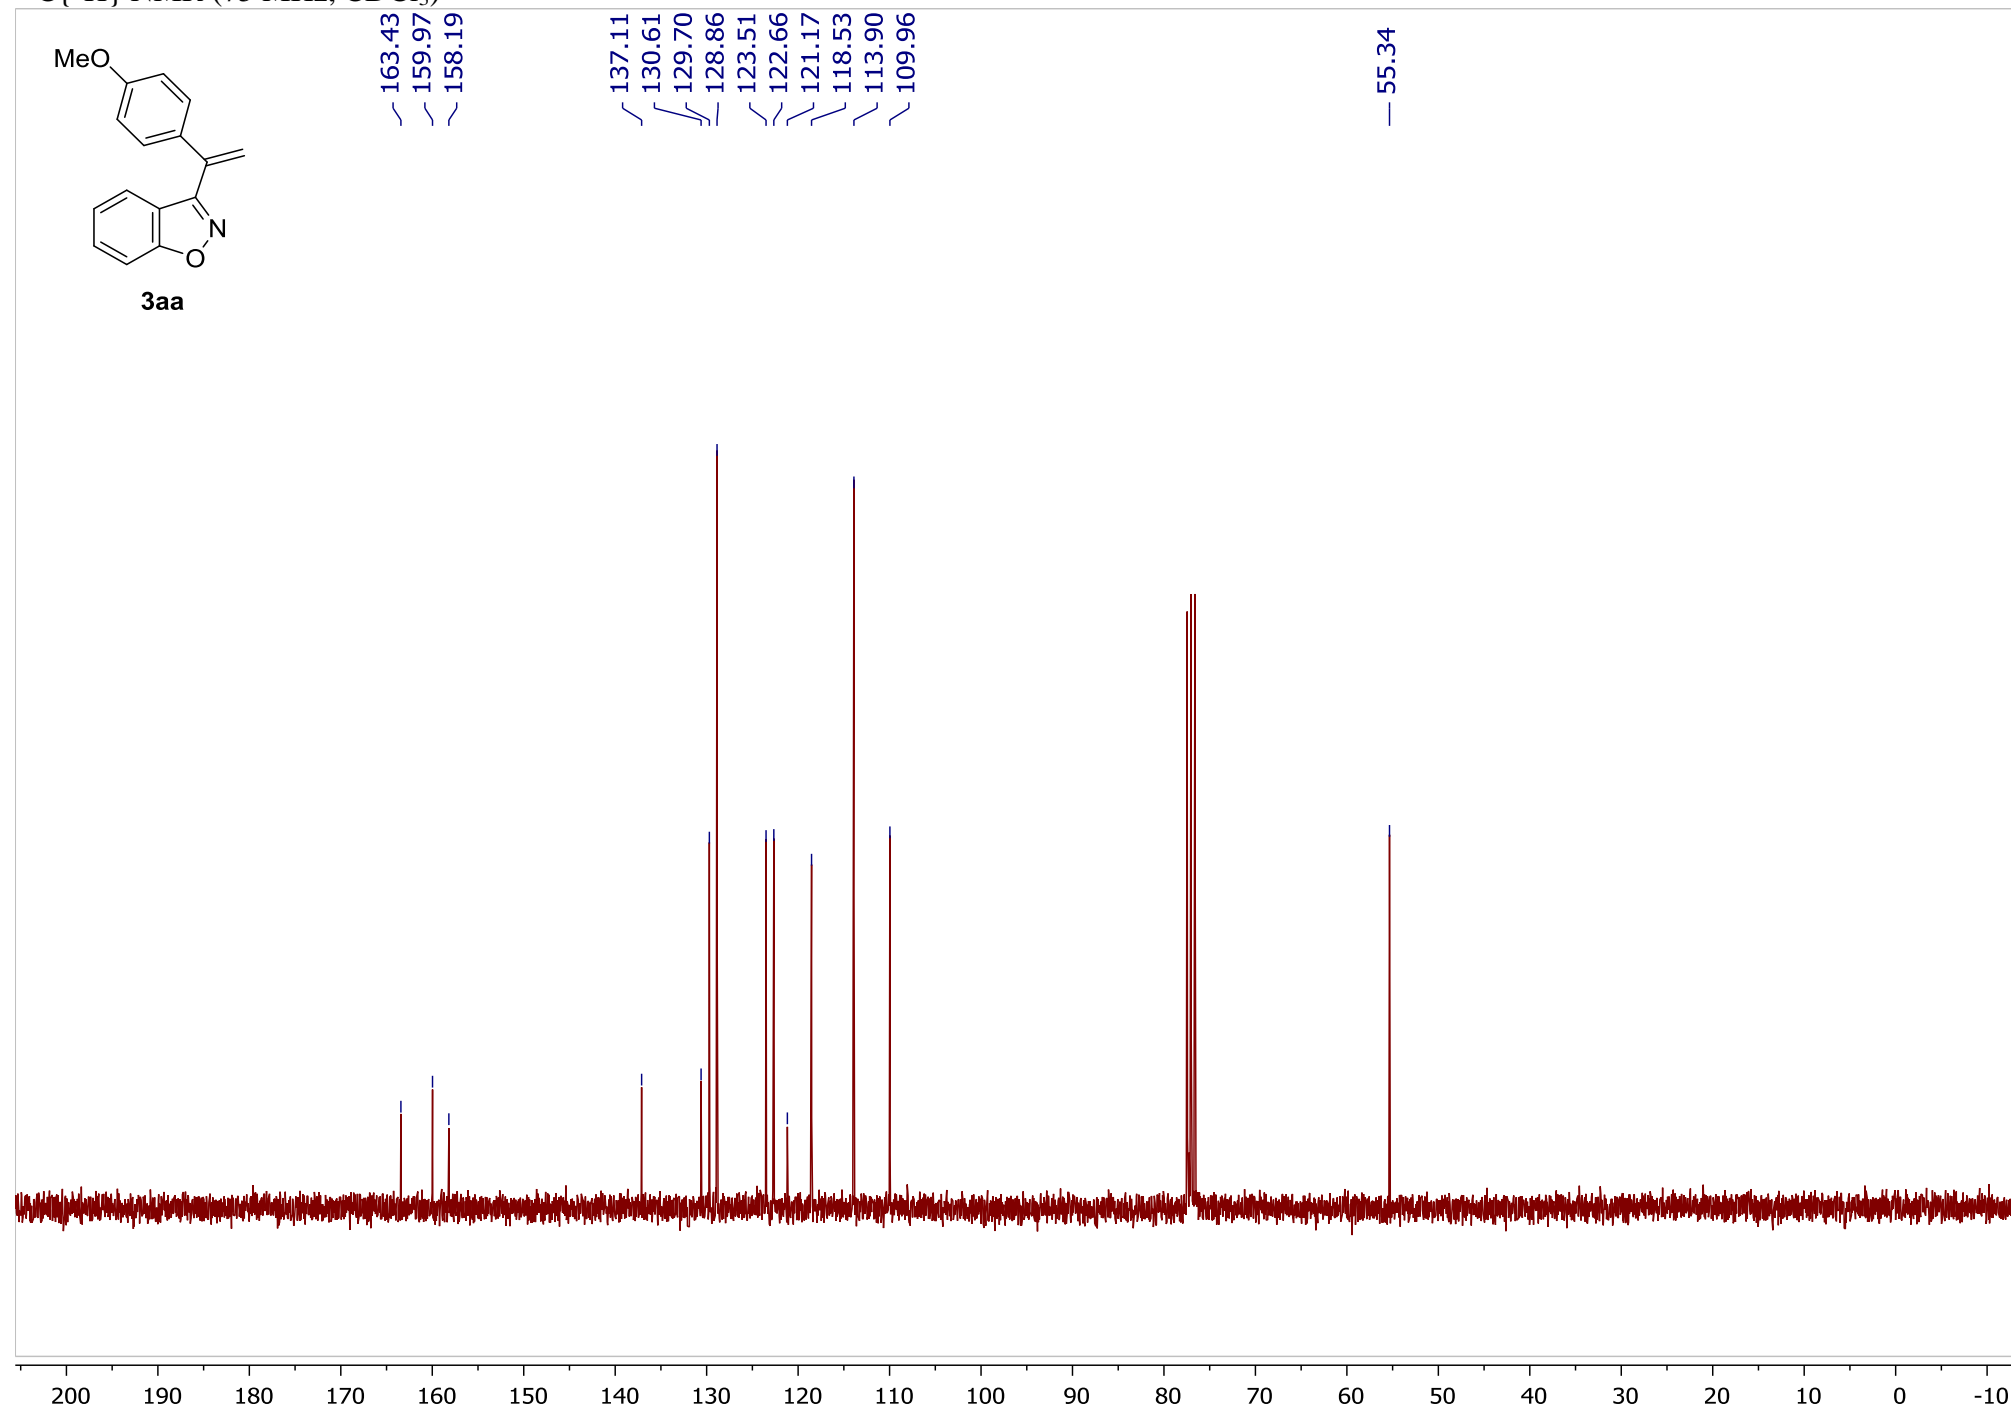

$^{13}\text{C}$  DEPT 135 (75 MHz,  $\text{CDCl}_3$ )

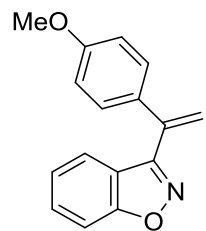

**3aa**

129.71  
128.87  
123.51  
122.66  
118.53  
113.90  
109.97

55.34

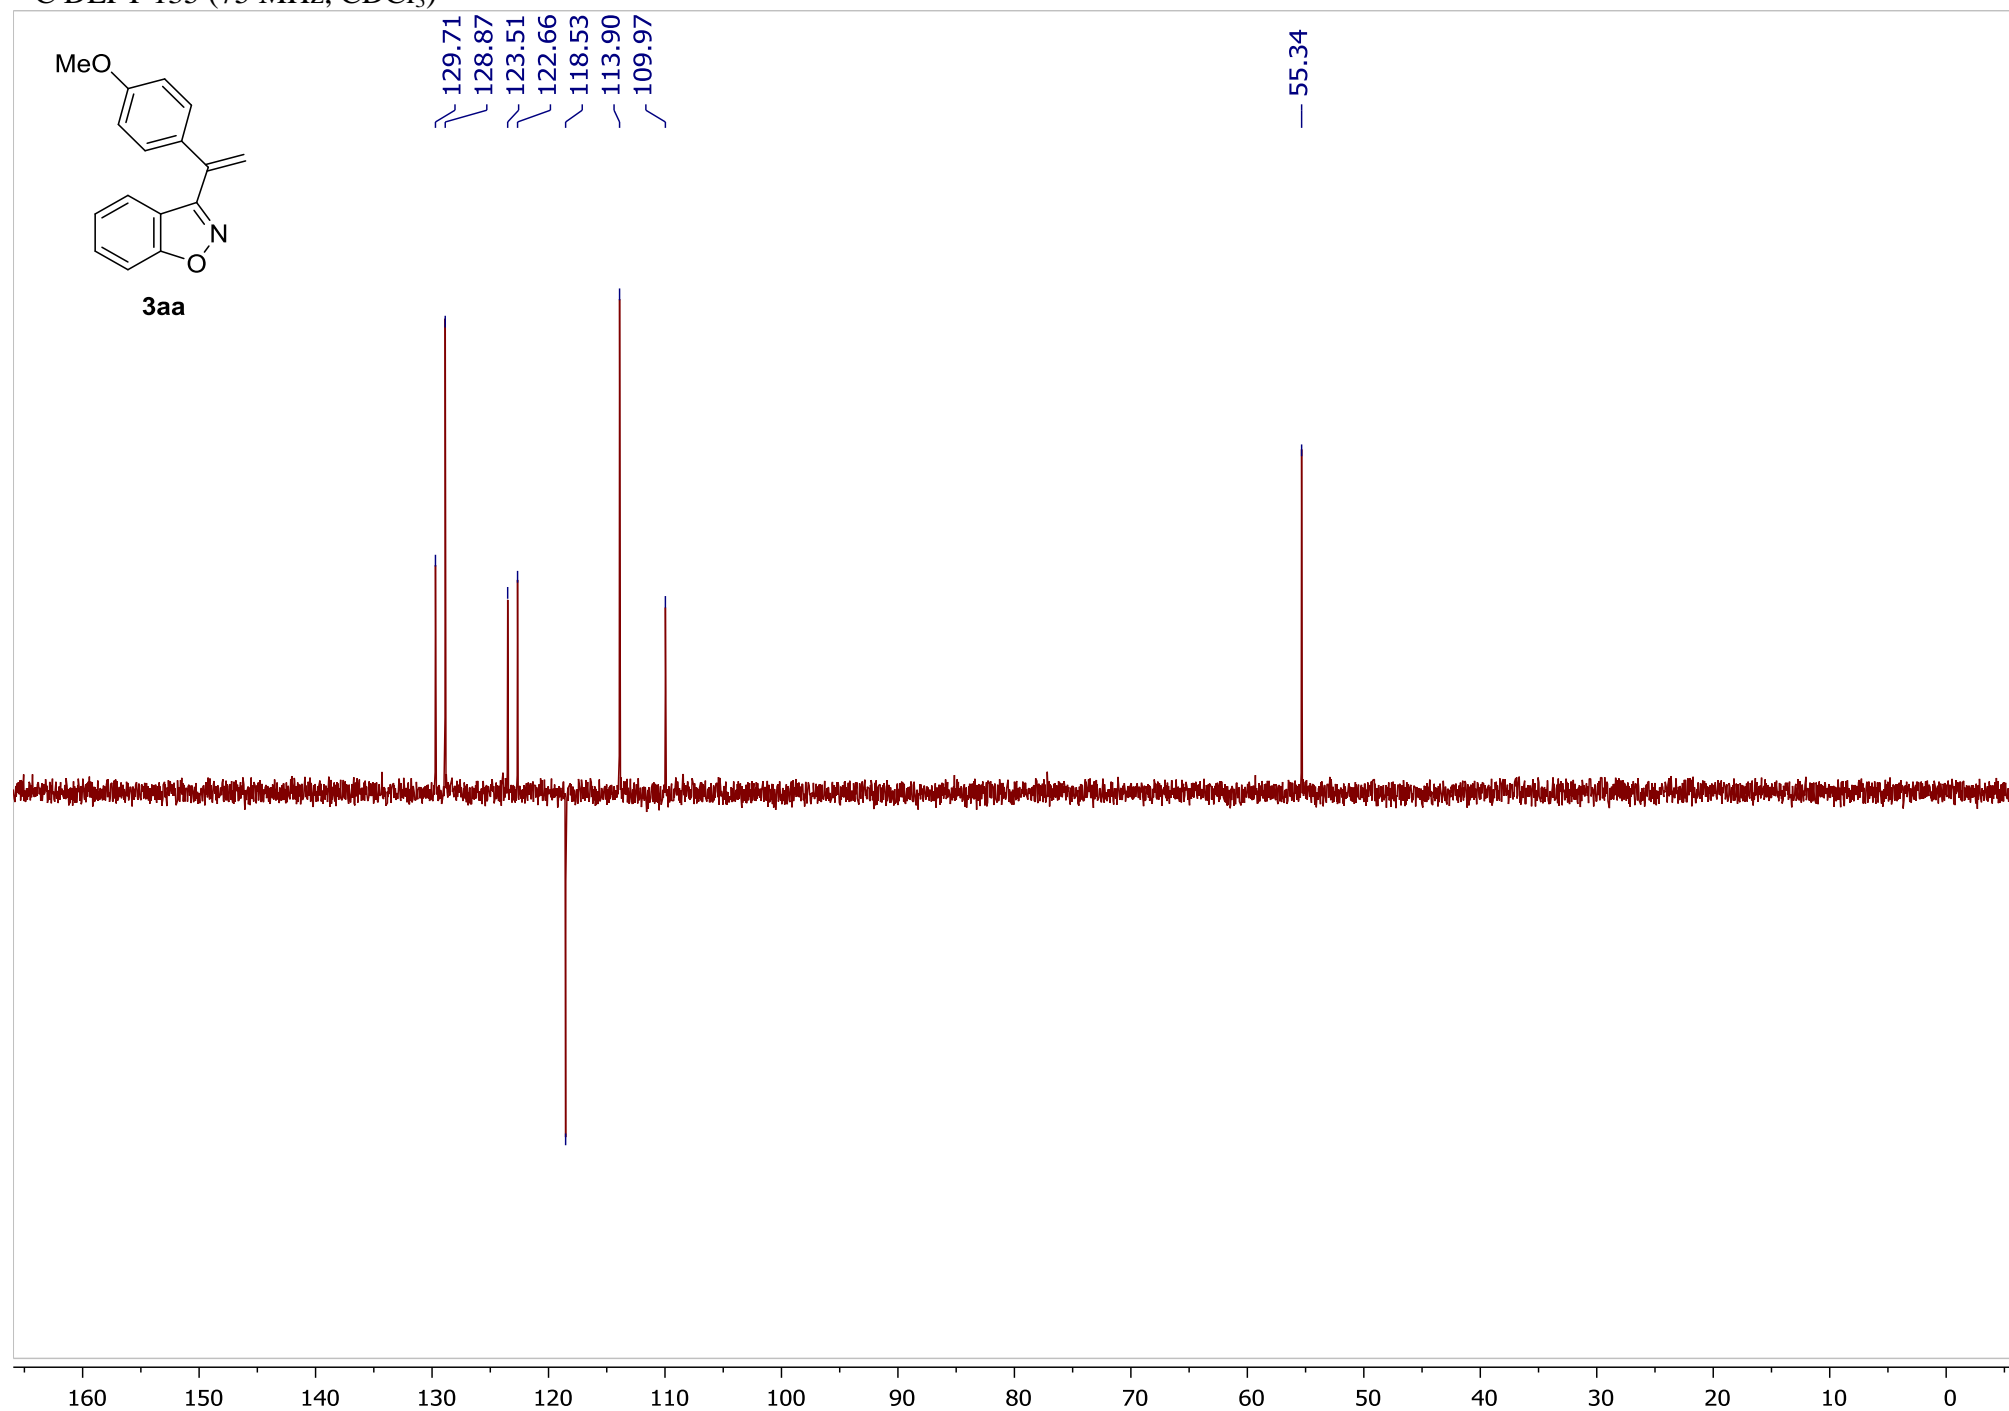

**3-(1-(4-Bromophenyl)vinyl)benzo[d]isoxazole 3ab**

<sup>1</sup>H NMR (300 MHz, CDCl<sub>3</sub>)

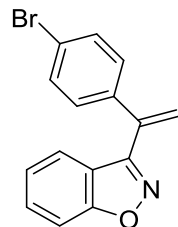

**3ab**

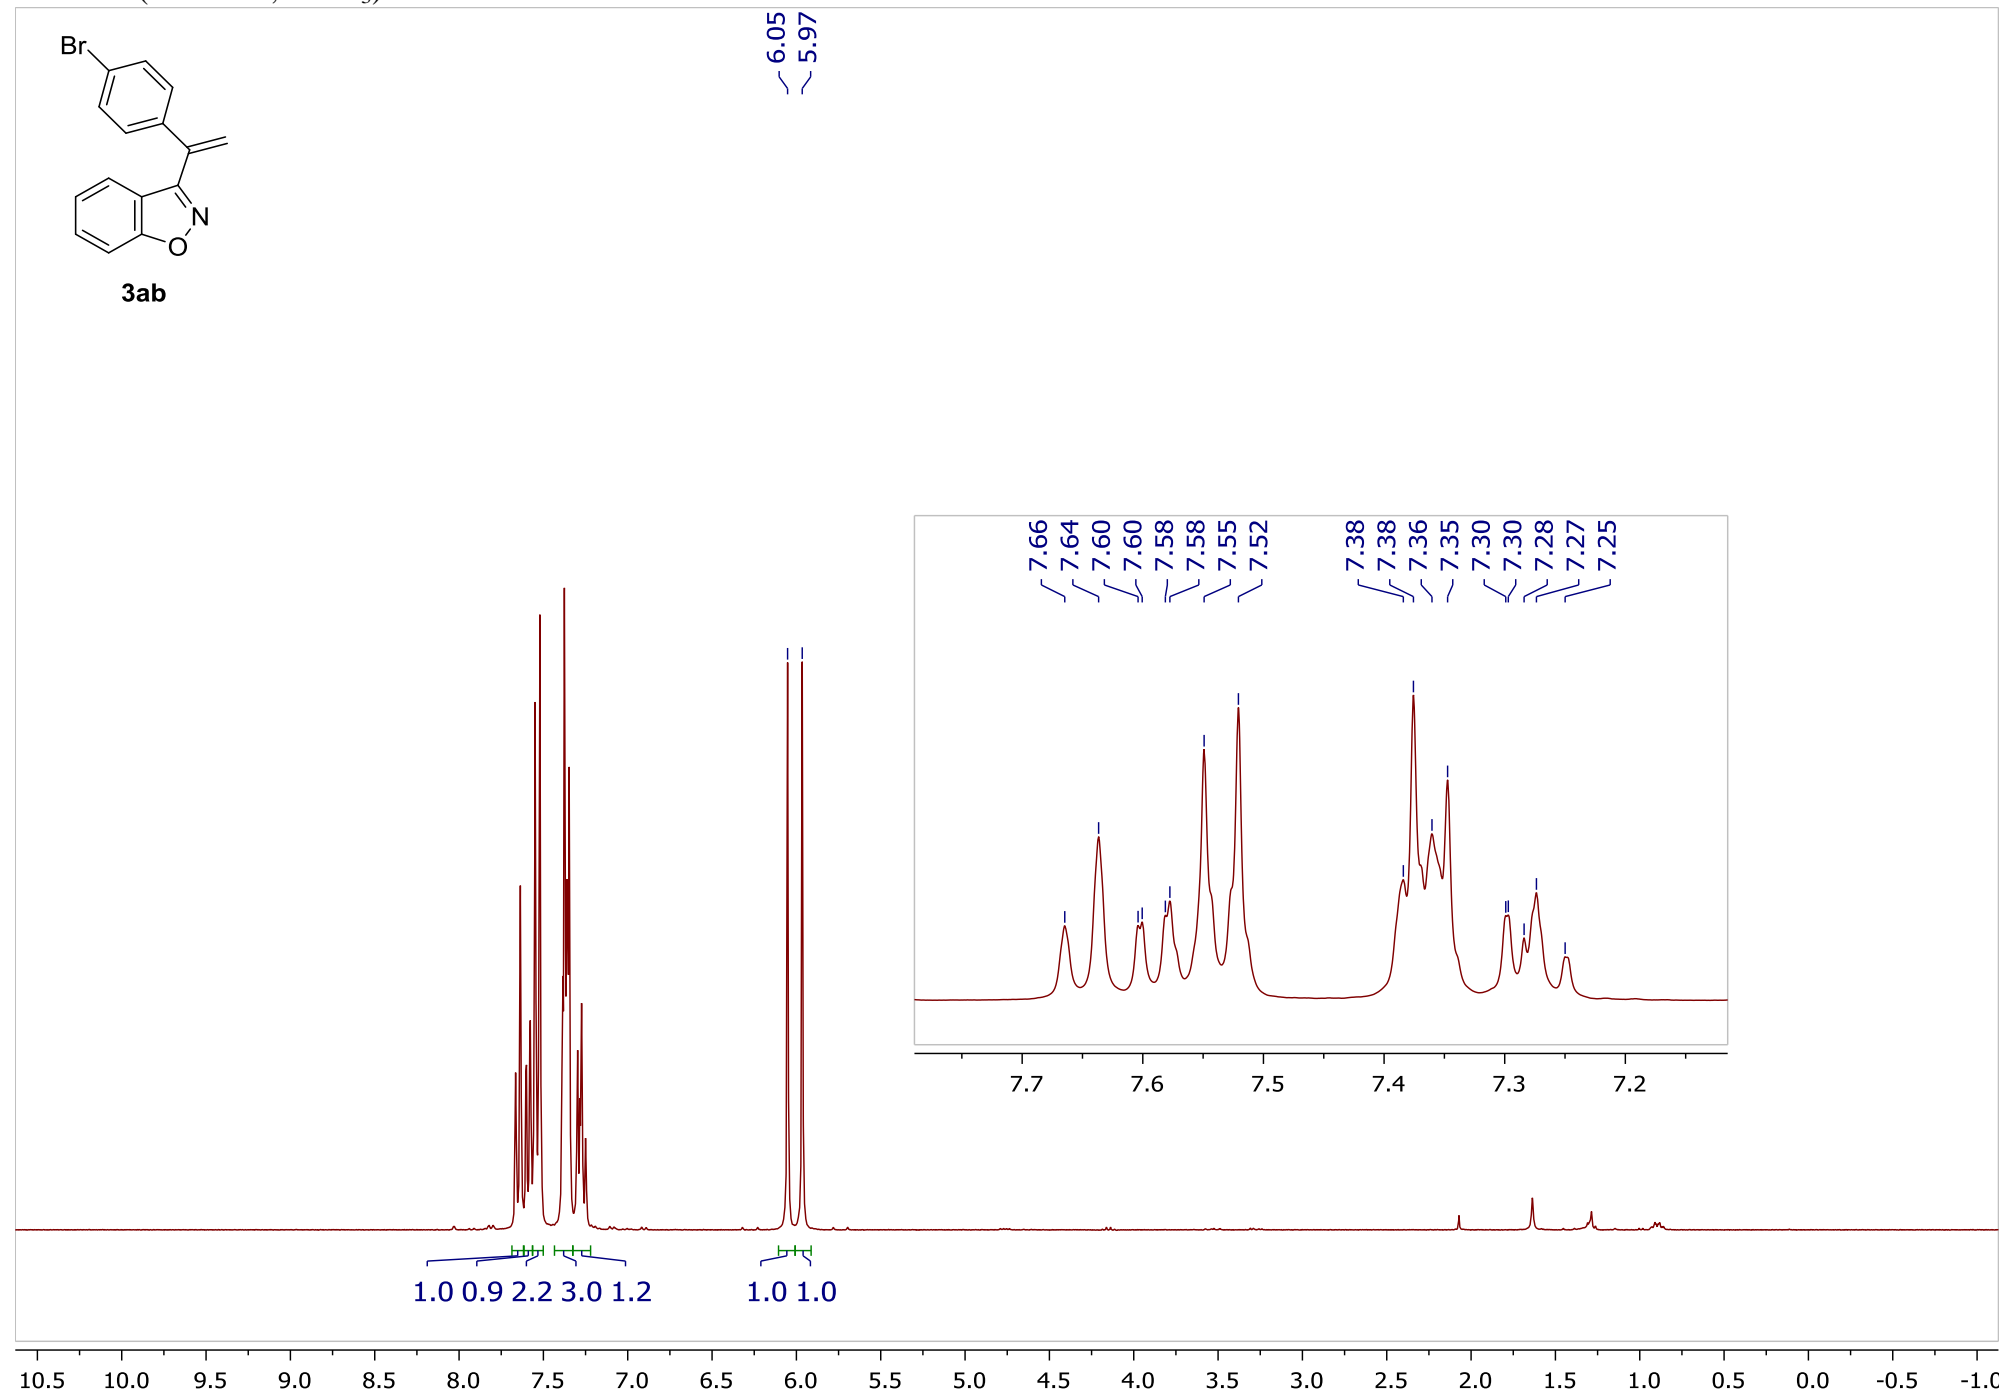

$^{13}\text{C}\{^1\text{H}\}$  NMR (75 MHz,  $\text{CDCl}_3$ )

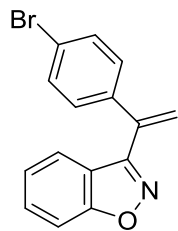

**3ab**

— 163.53

— 157.42

137.05

136.92

131.72

129.90

129.28

123.76

122.88

122.38

120.83

120.75

— 110.10

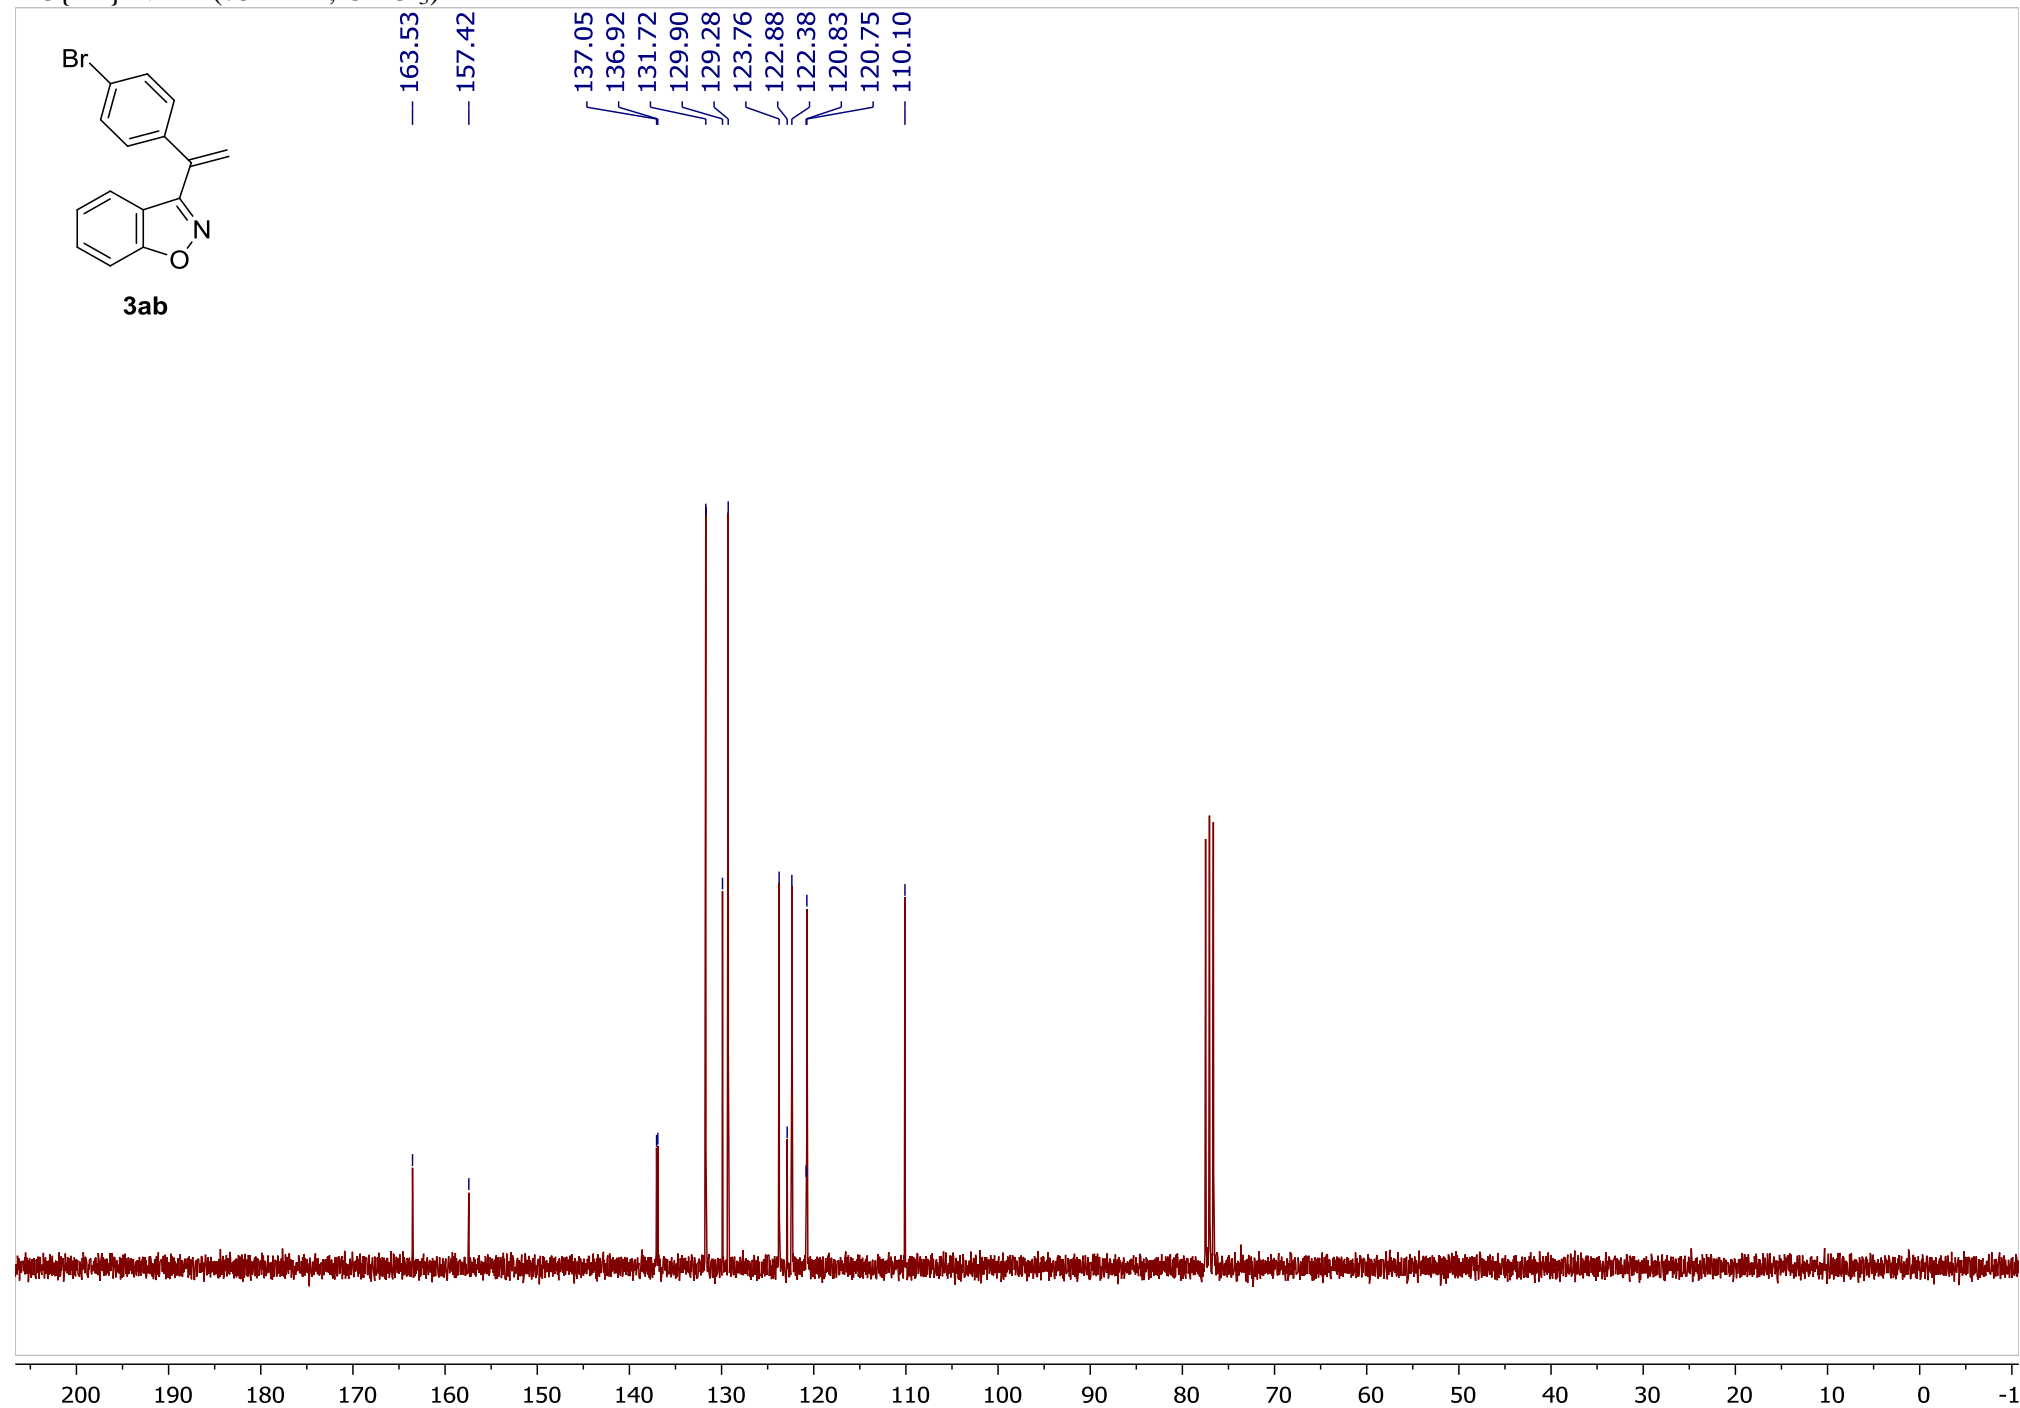

$^{13}\text{C}$  DEPT 135 (75 MHz,  $\text{CDCl}_3$ )

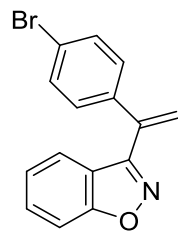

**3ab**

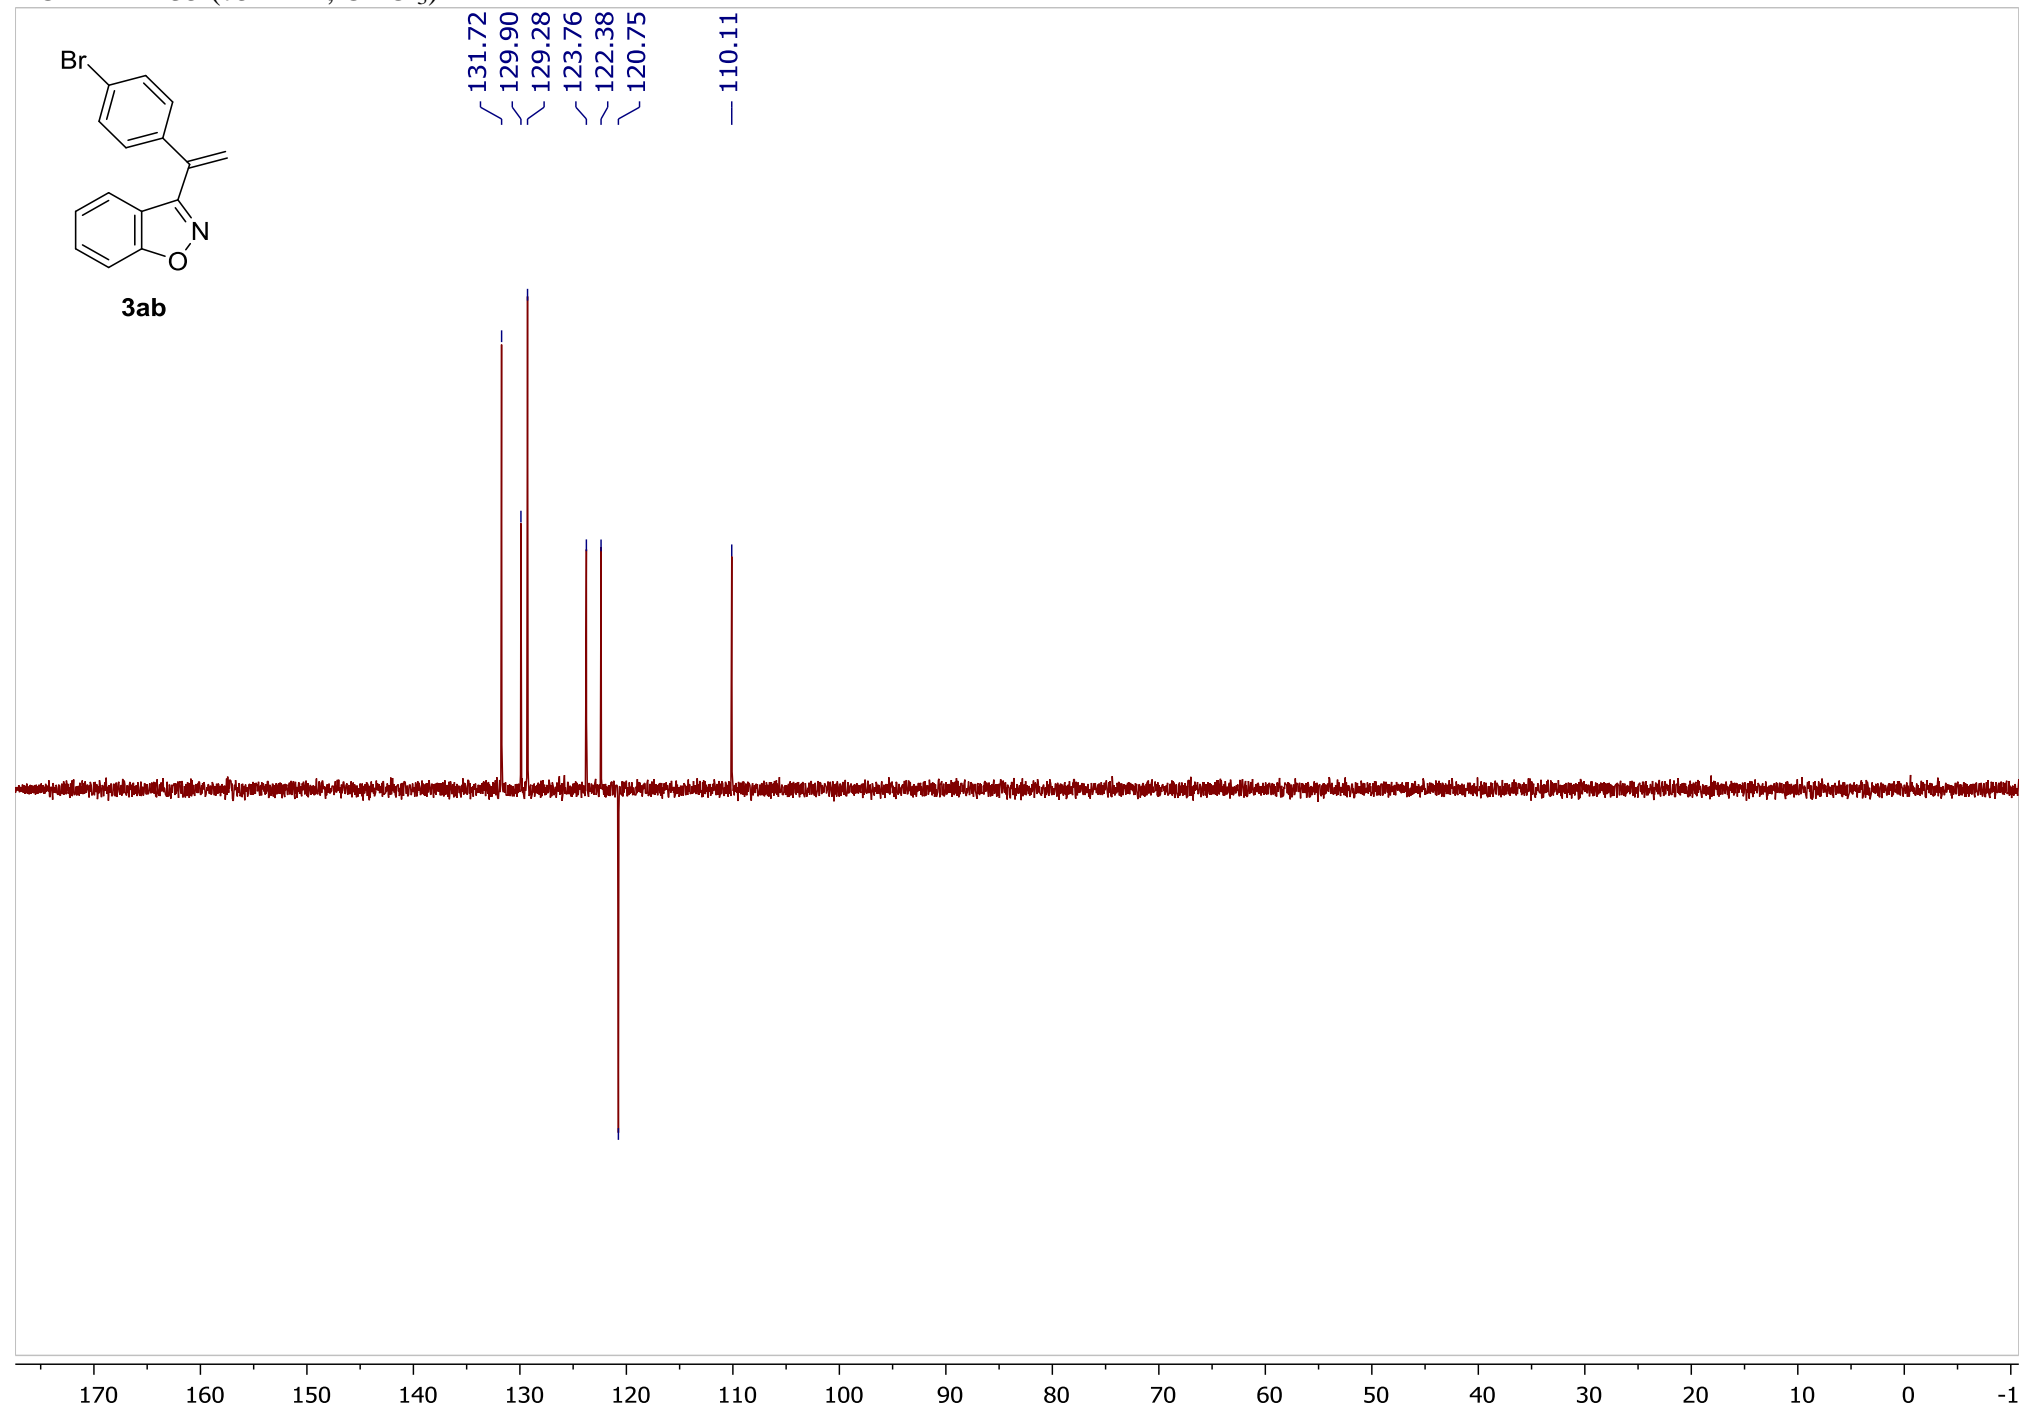

$^1\text{H}-^{13}\text{C}$  HSQC

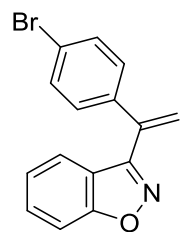

**3ab**

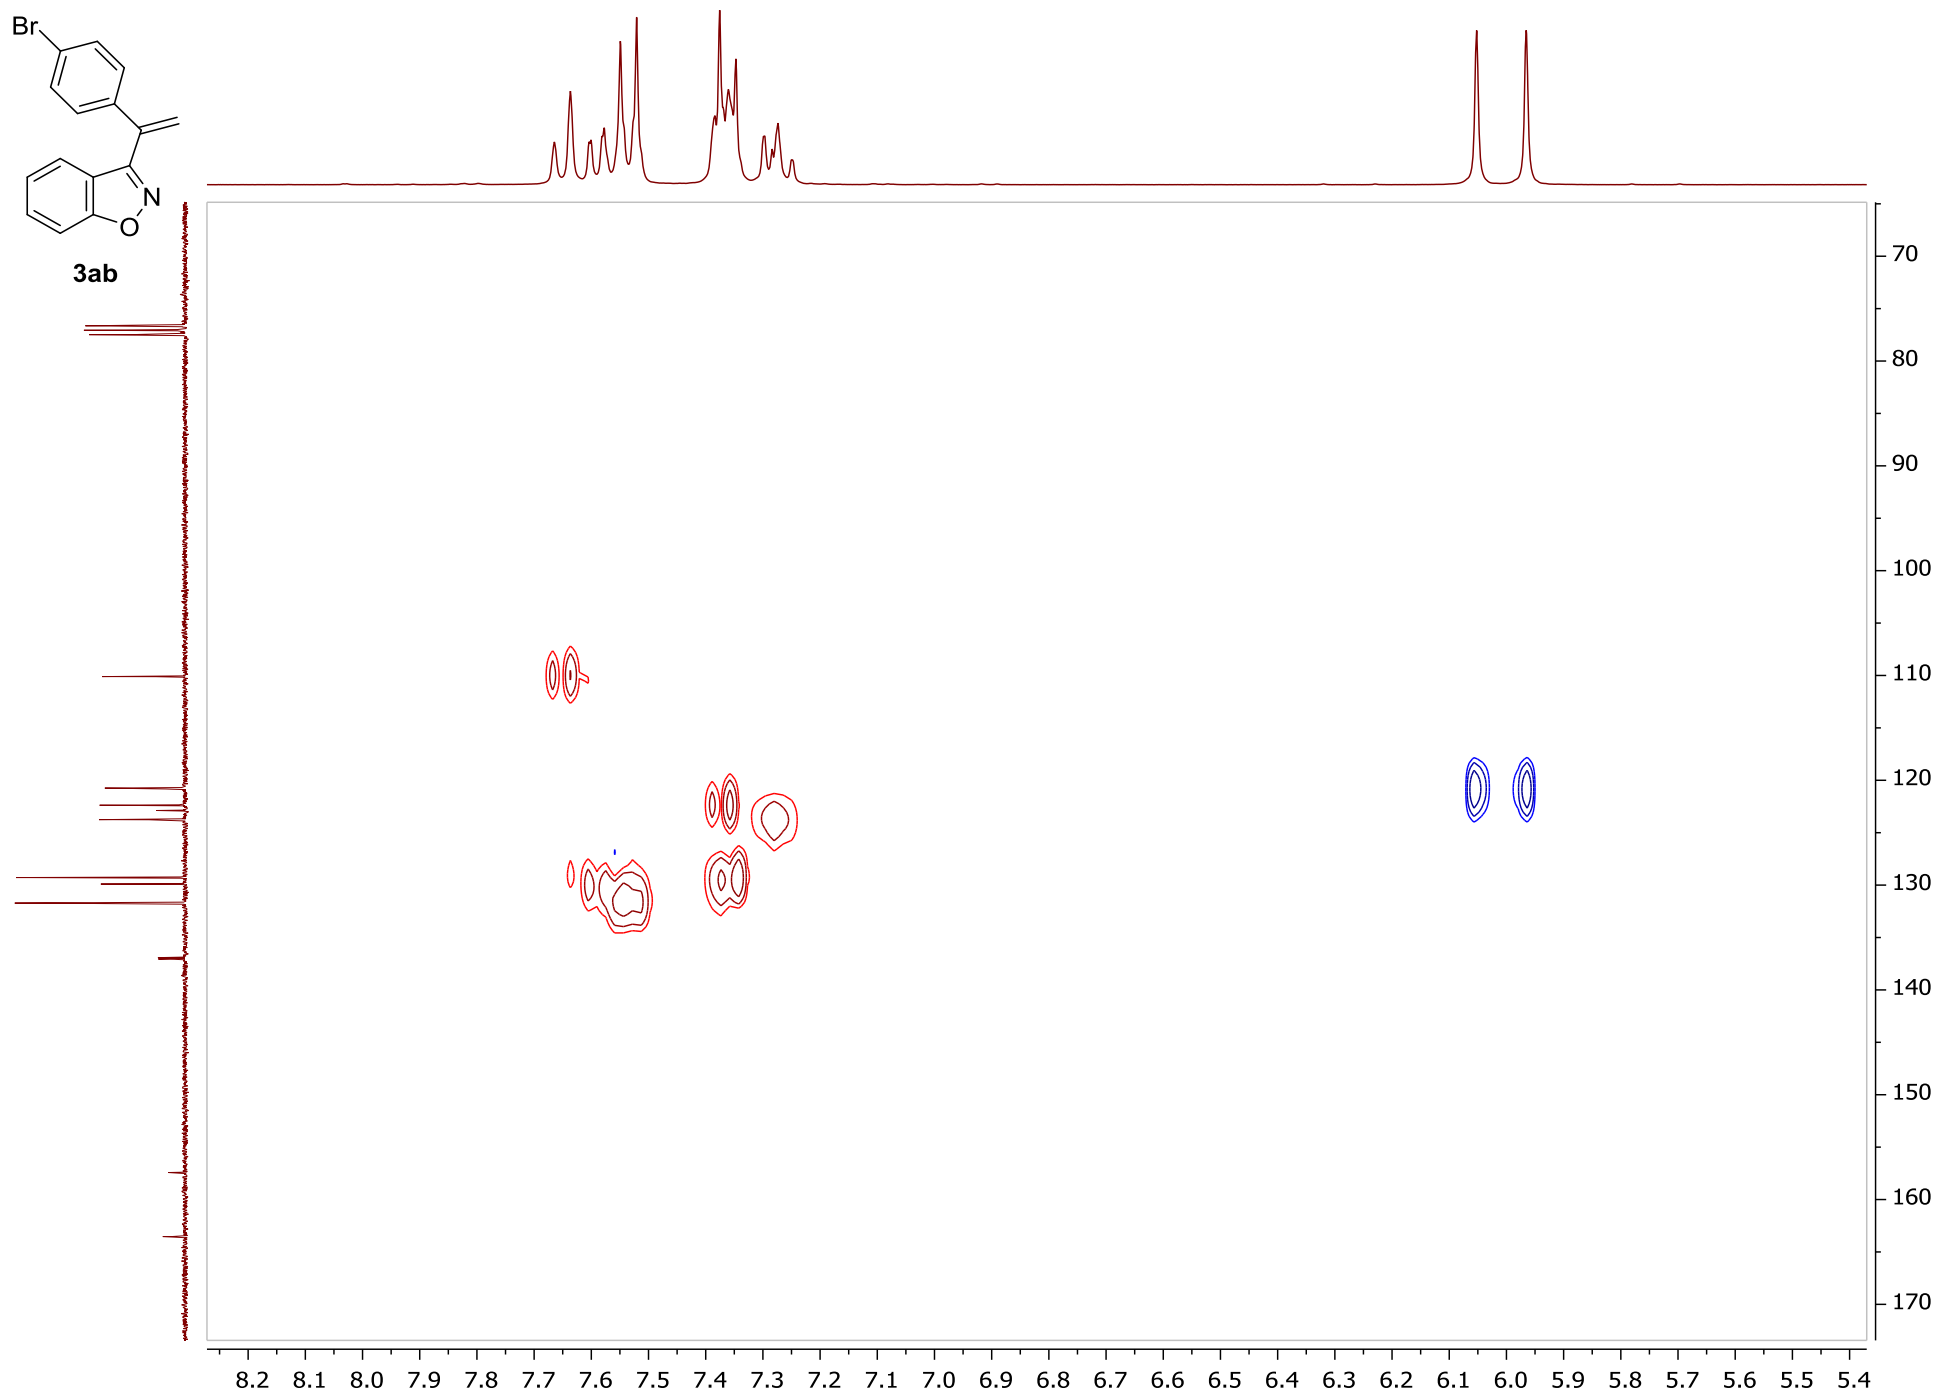

$^1\text{H}-^{13}\text{C}$  HMBC

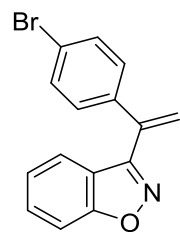

**3ab**

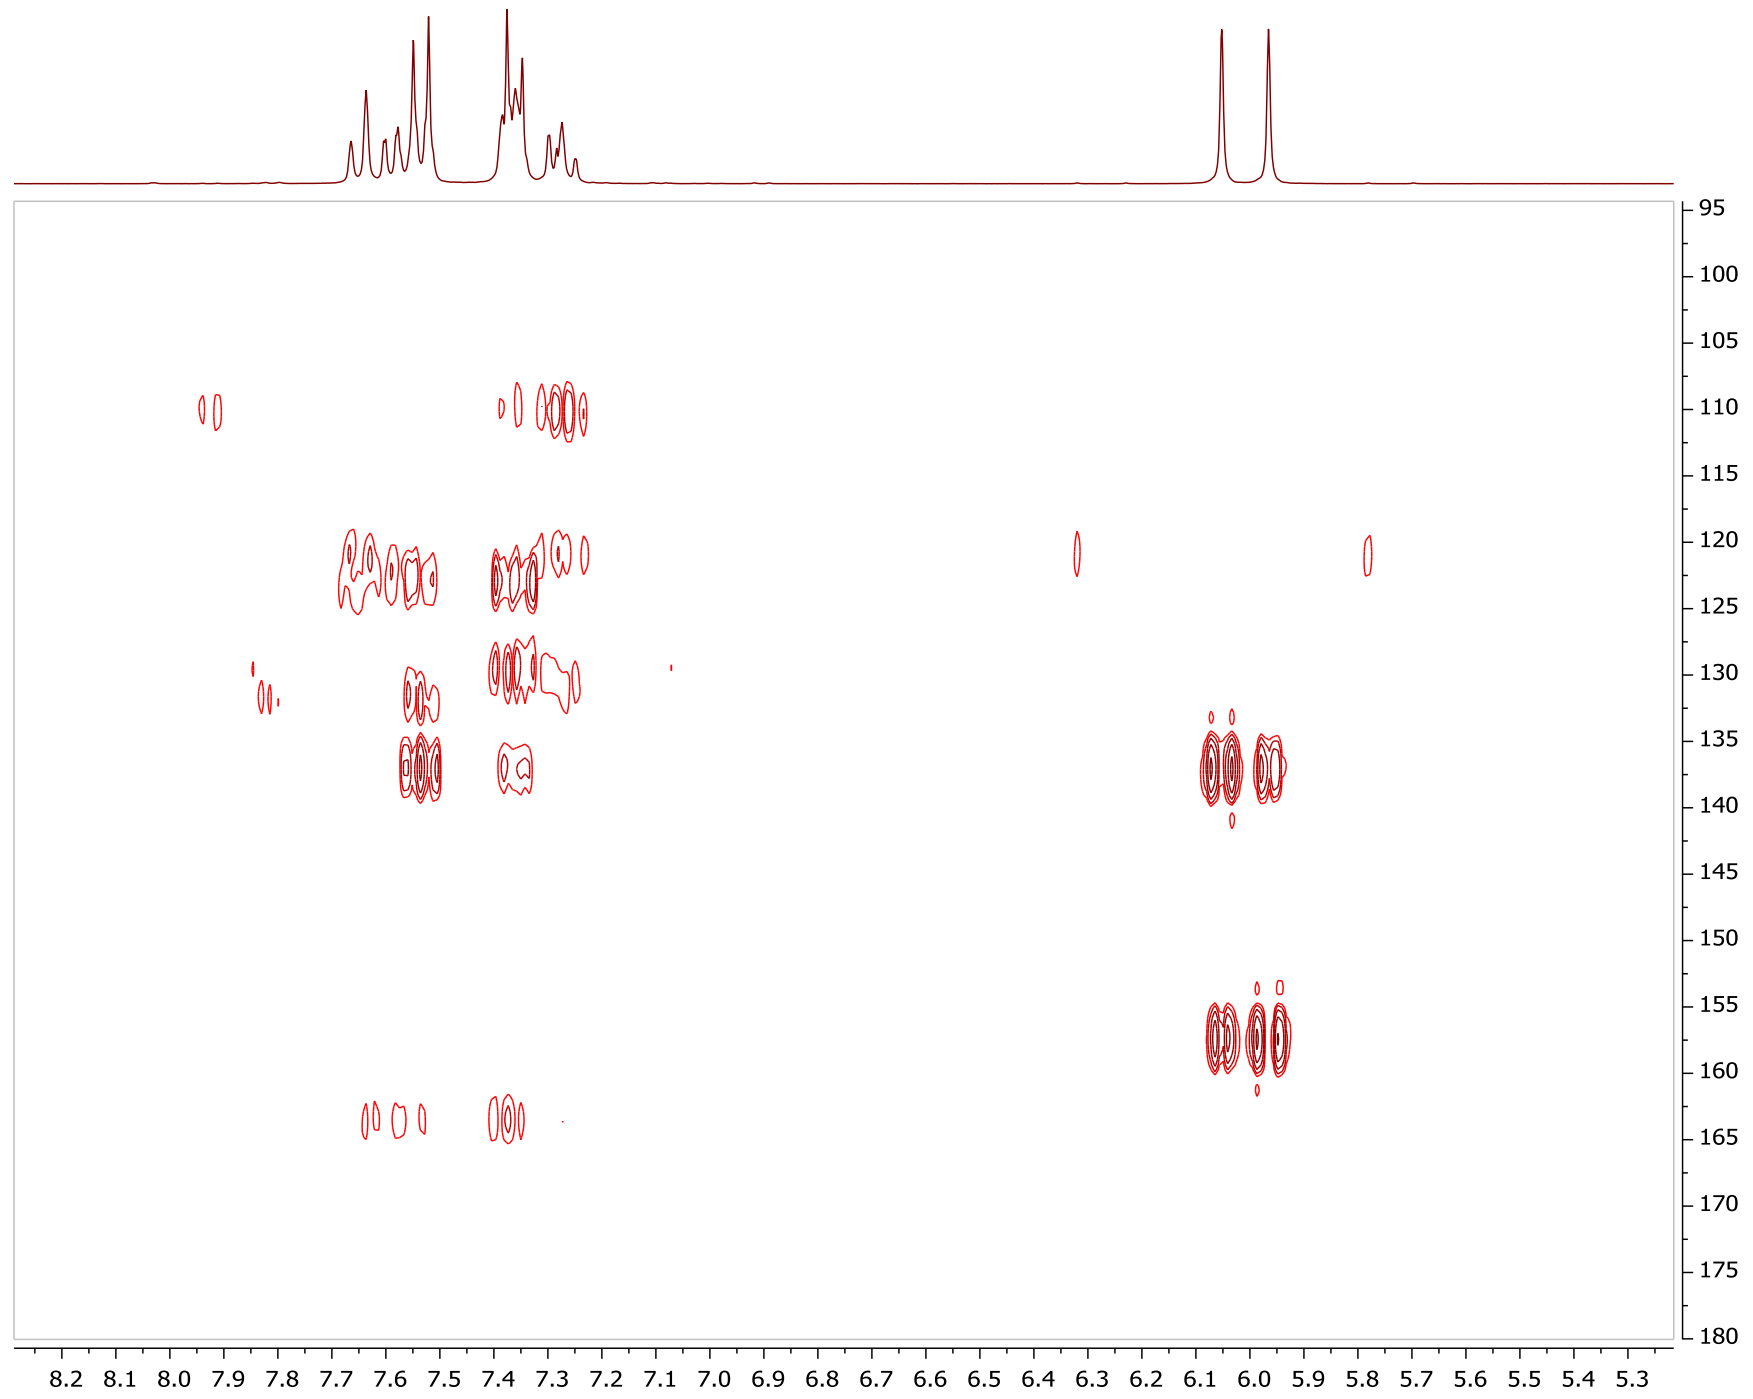



**3-(1-(4-Chlorophenyl)vinyl)benzo[d]isoxazole 3ac**

<sup>1</sup>H NMR (300 MHz, CDCl<sub>3</sub>)

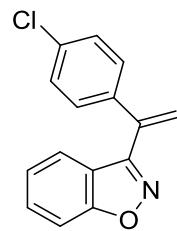

**3ac**

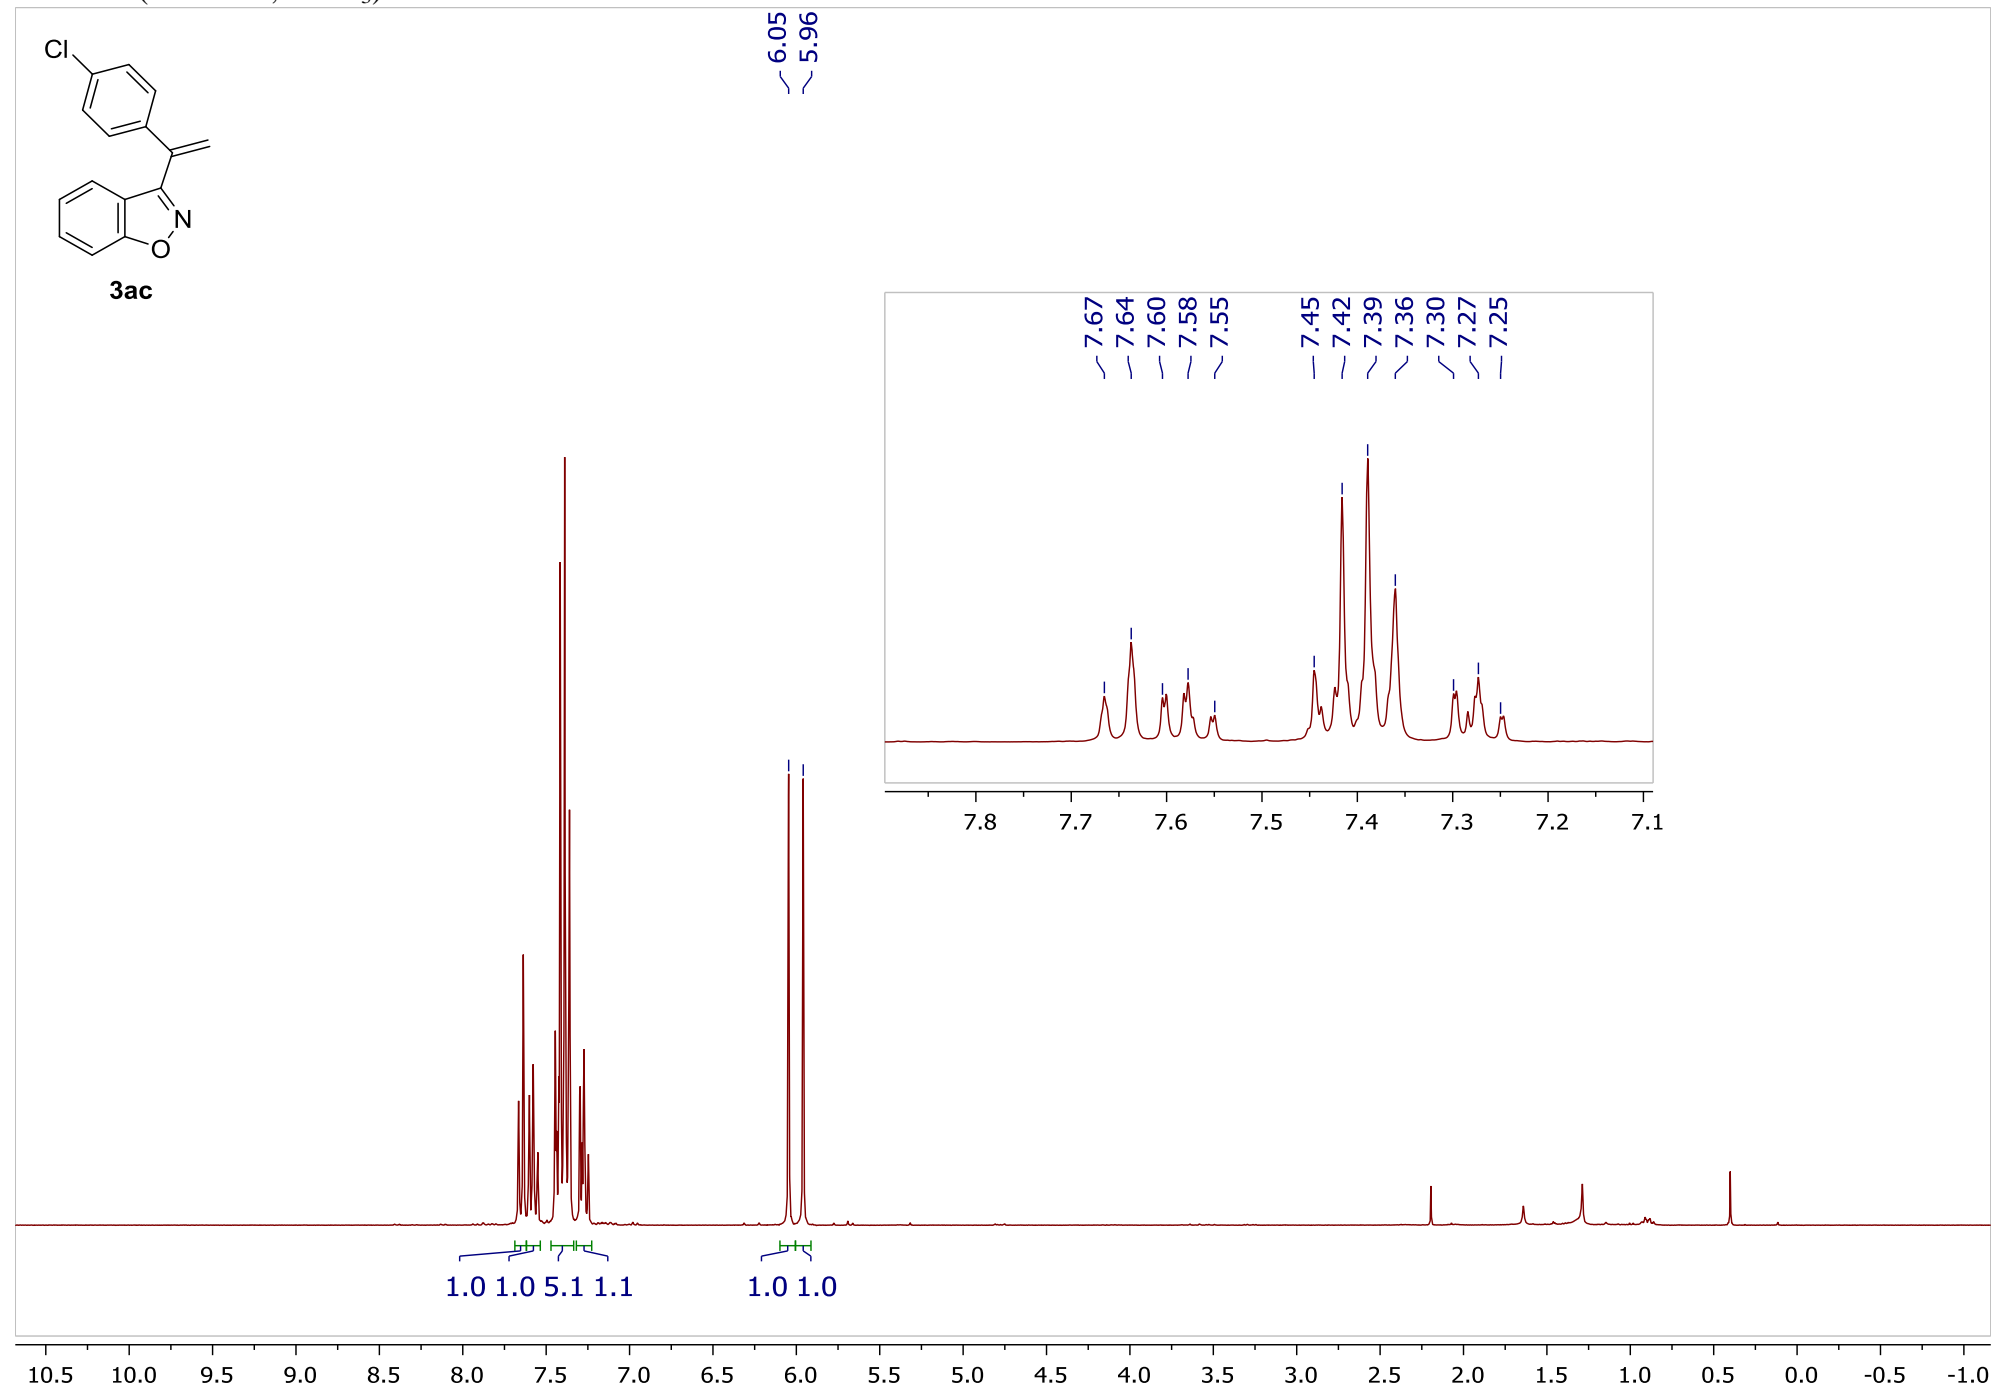

$^{13}\text{C}\{^1\text{H}\}$  NMR (75 MHz,  $\text{CDCl}_3$ )

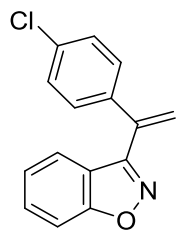

**3ac**

— 163.53  
— 157.50  
136.85  
136.59  
134.65  
129.89  
128.99  
128.76  
123.74  
122.38  
120.85  
120.69  
— 110.10

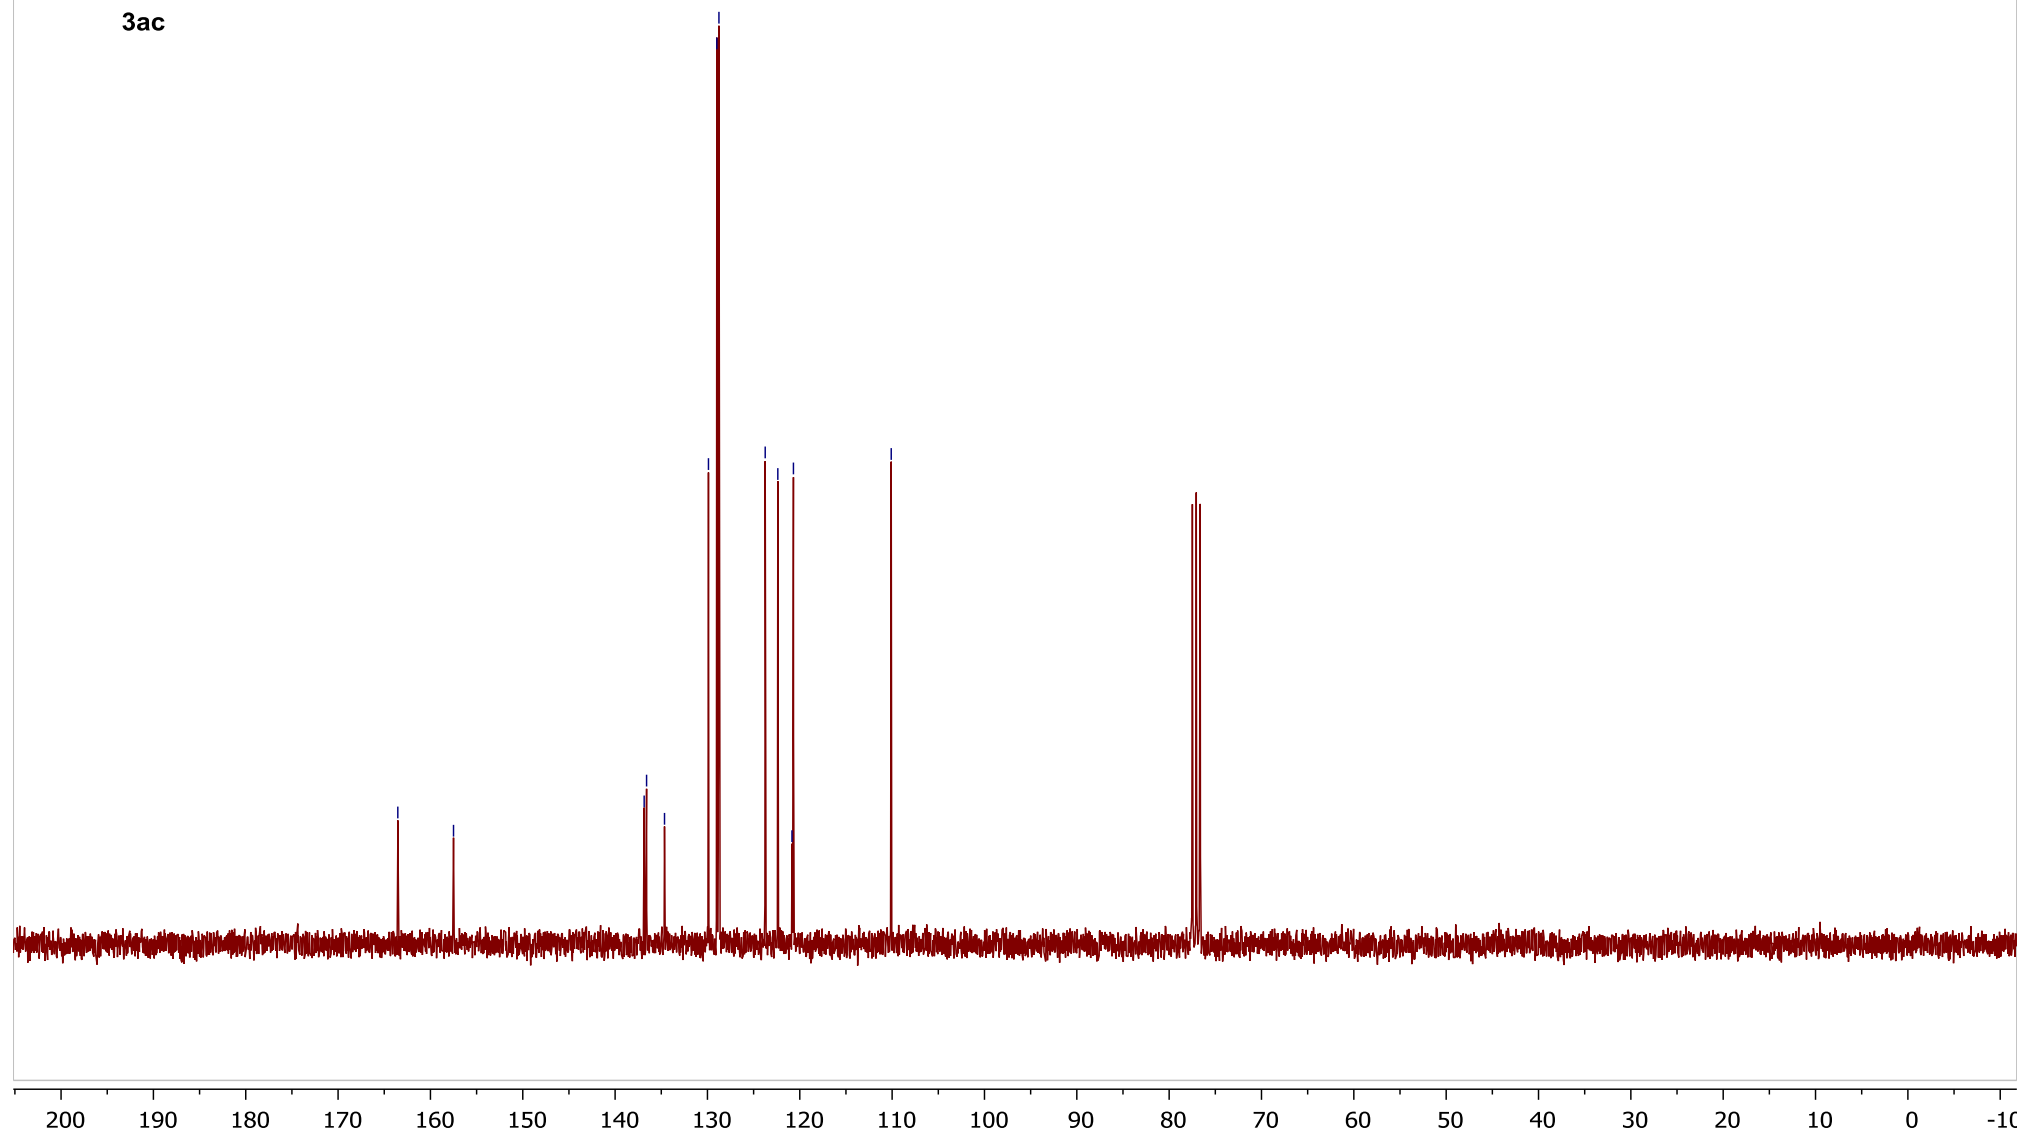

$^{13}\text{C}$  DEPT 135 (75 MHz,  $\text{CDCl}_3$ )

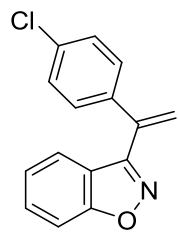

**3ac**

129.89  
128.99  
128.76  
123.75  
122.38  
120.69  
110.10

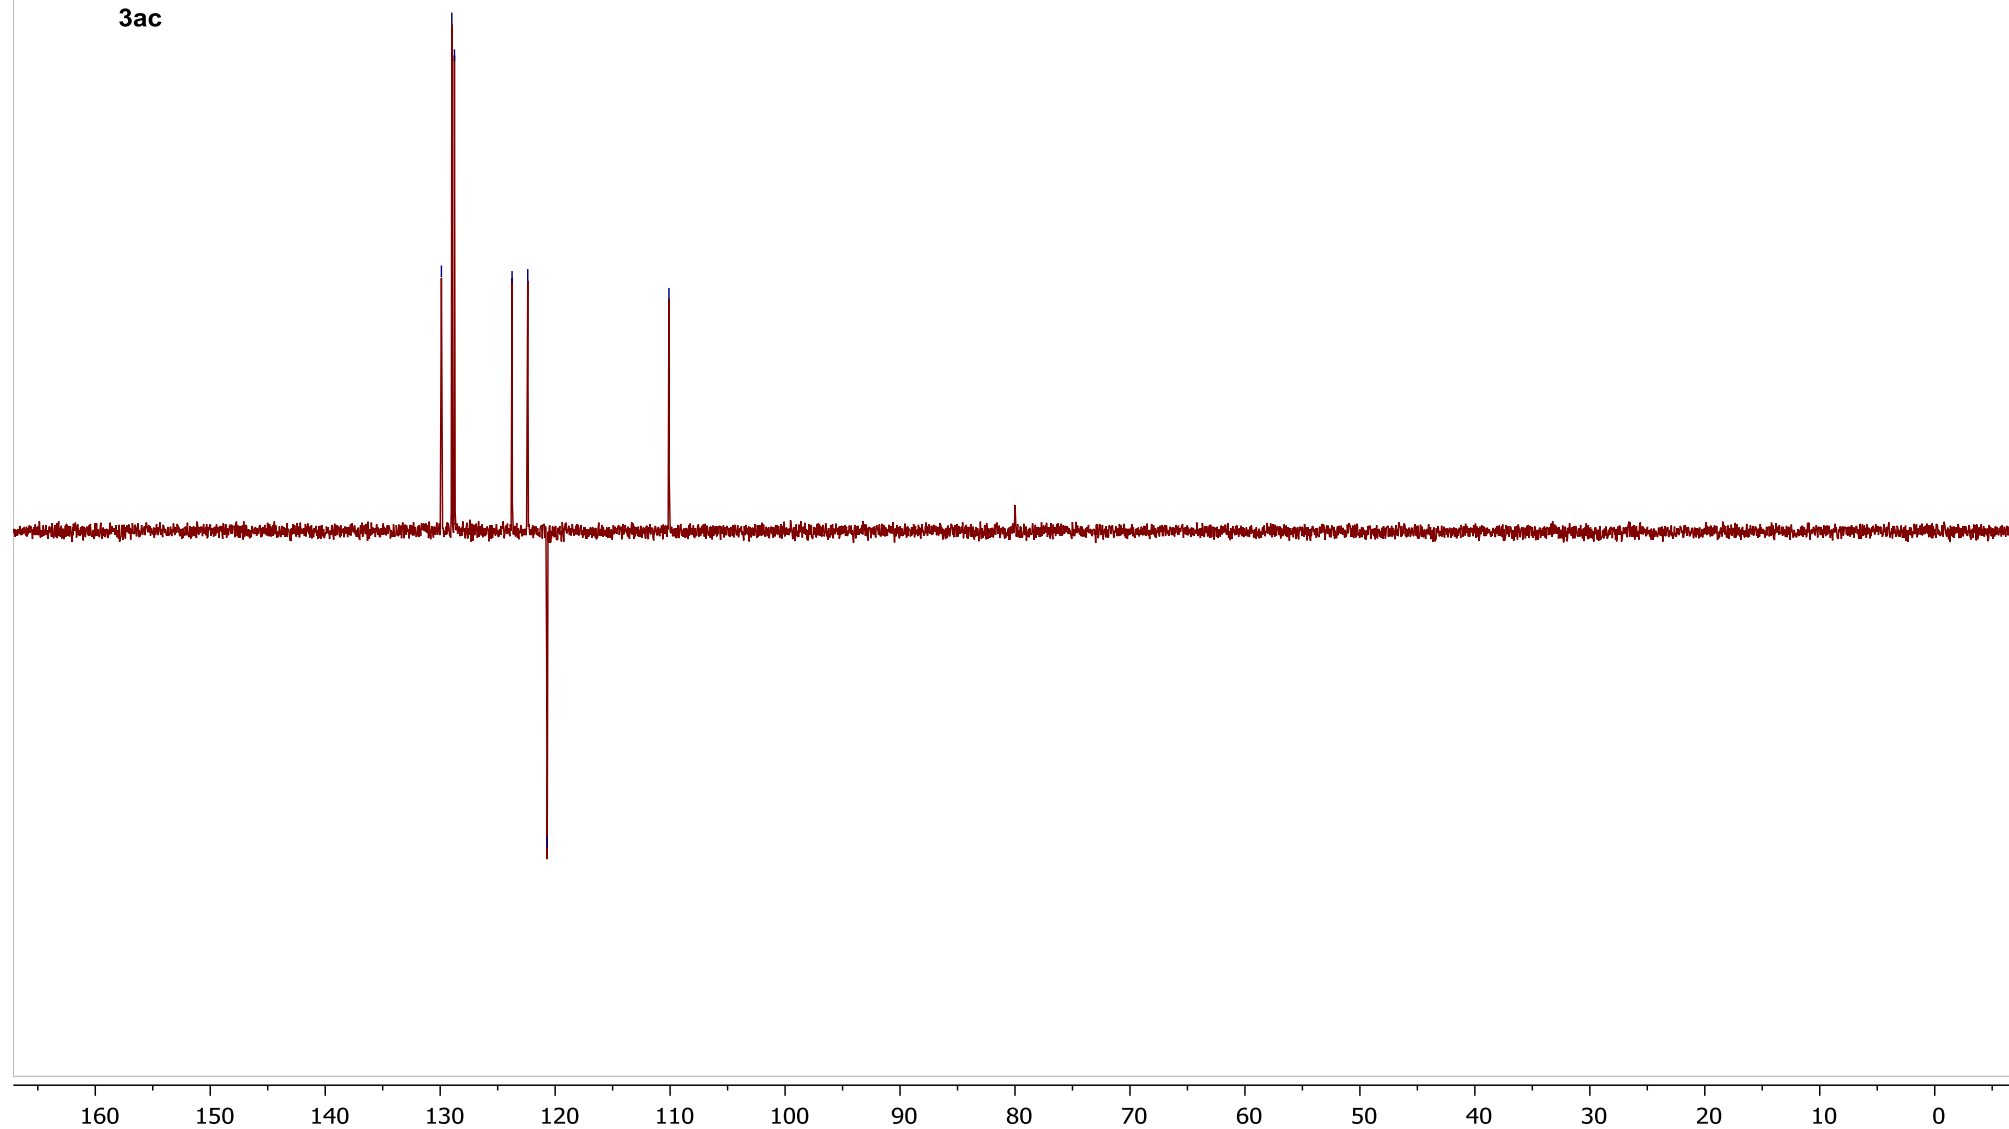

$^1\text{H}$ - $^{13}\text{C}$  HSQC

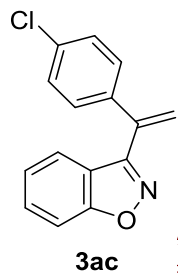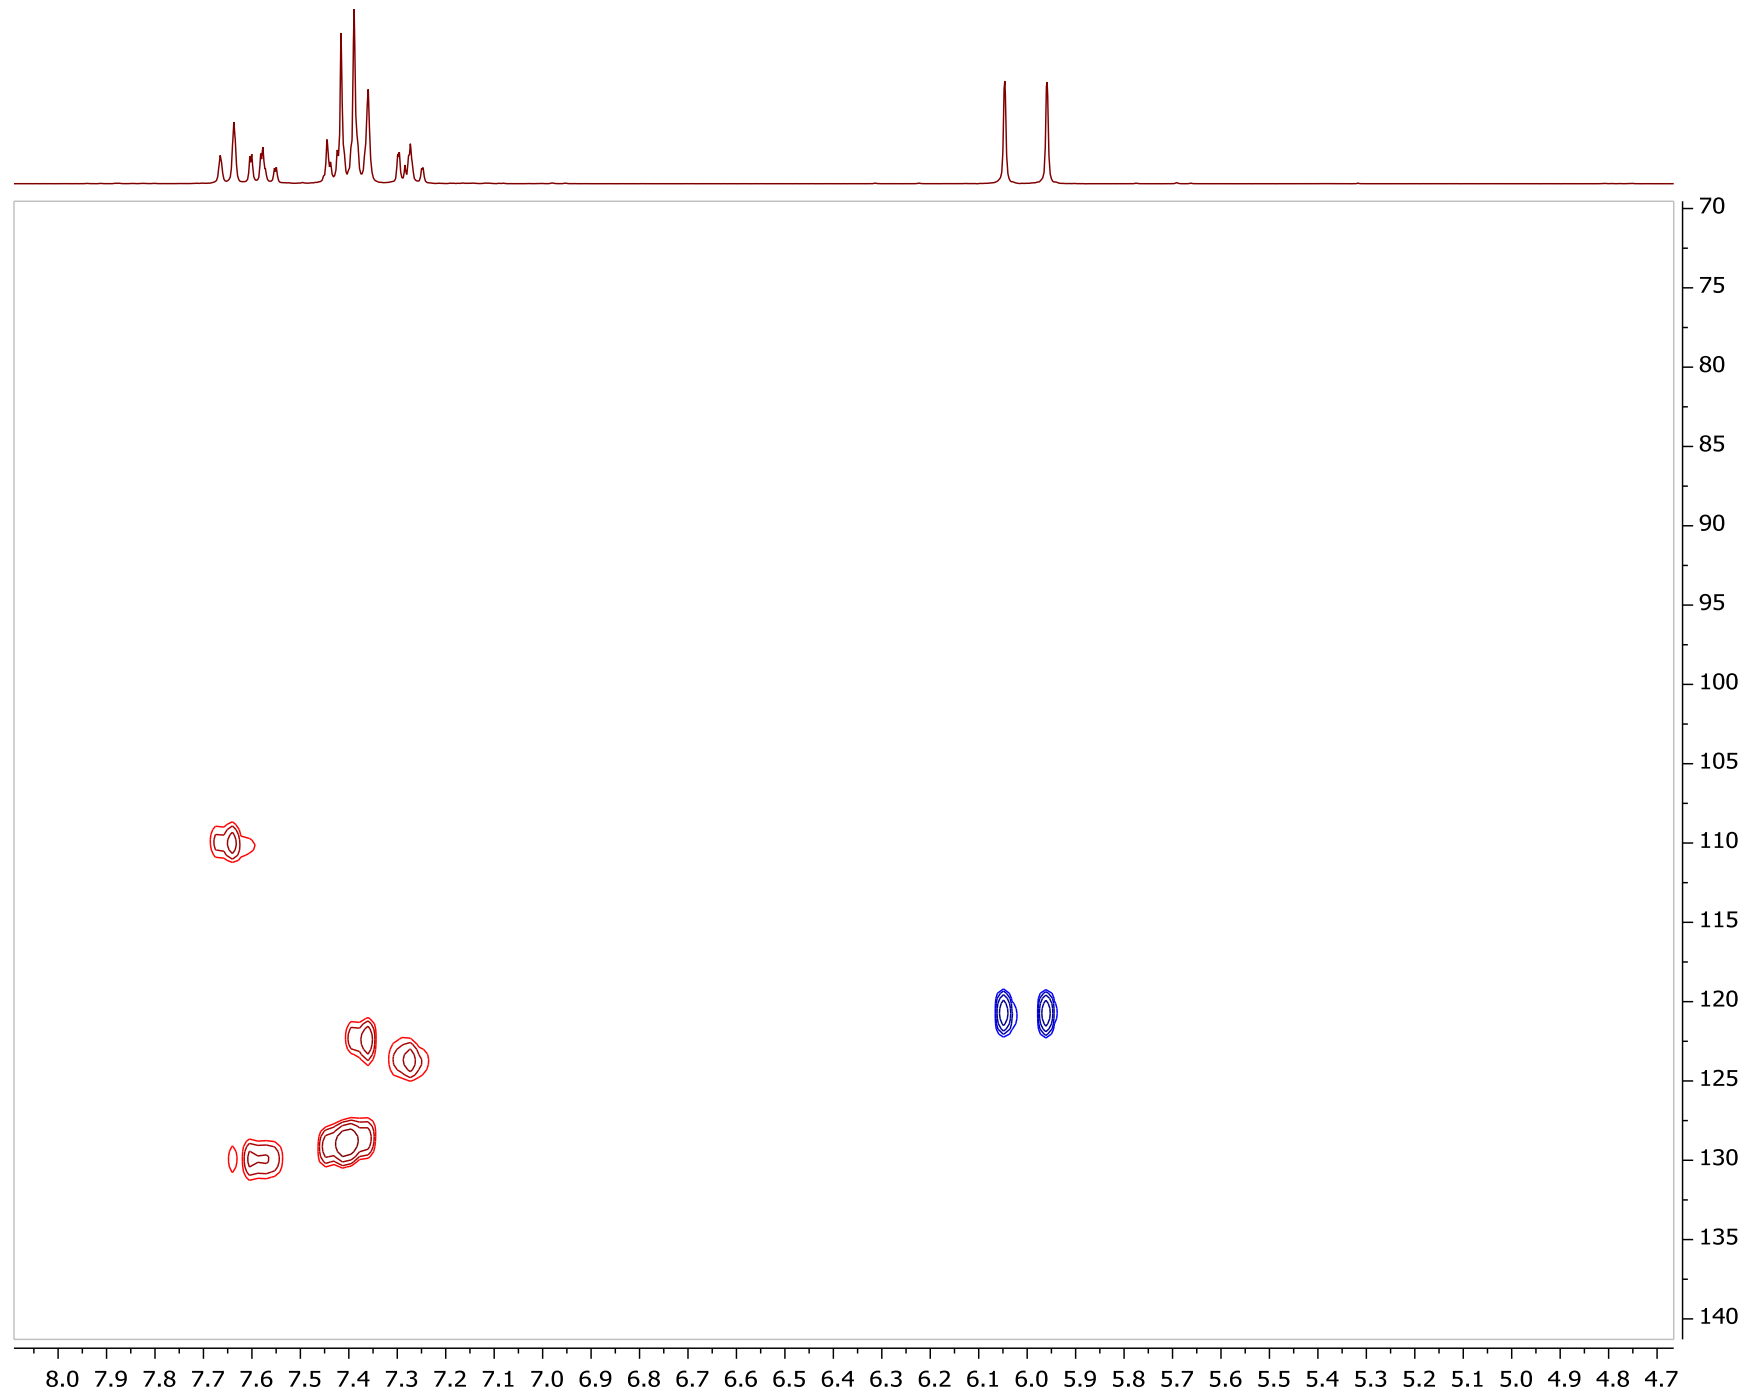

**3-(1-(4-Fluorophenyl)vinyl)benzo[d]isoxazole 3ad**

<sup>1</sup>H NMR (300 MHz, CDCl<sub>3</sub>)

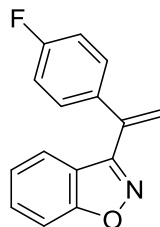

**3ad**

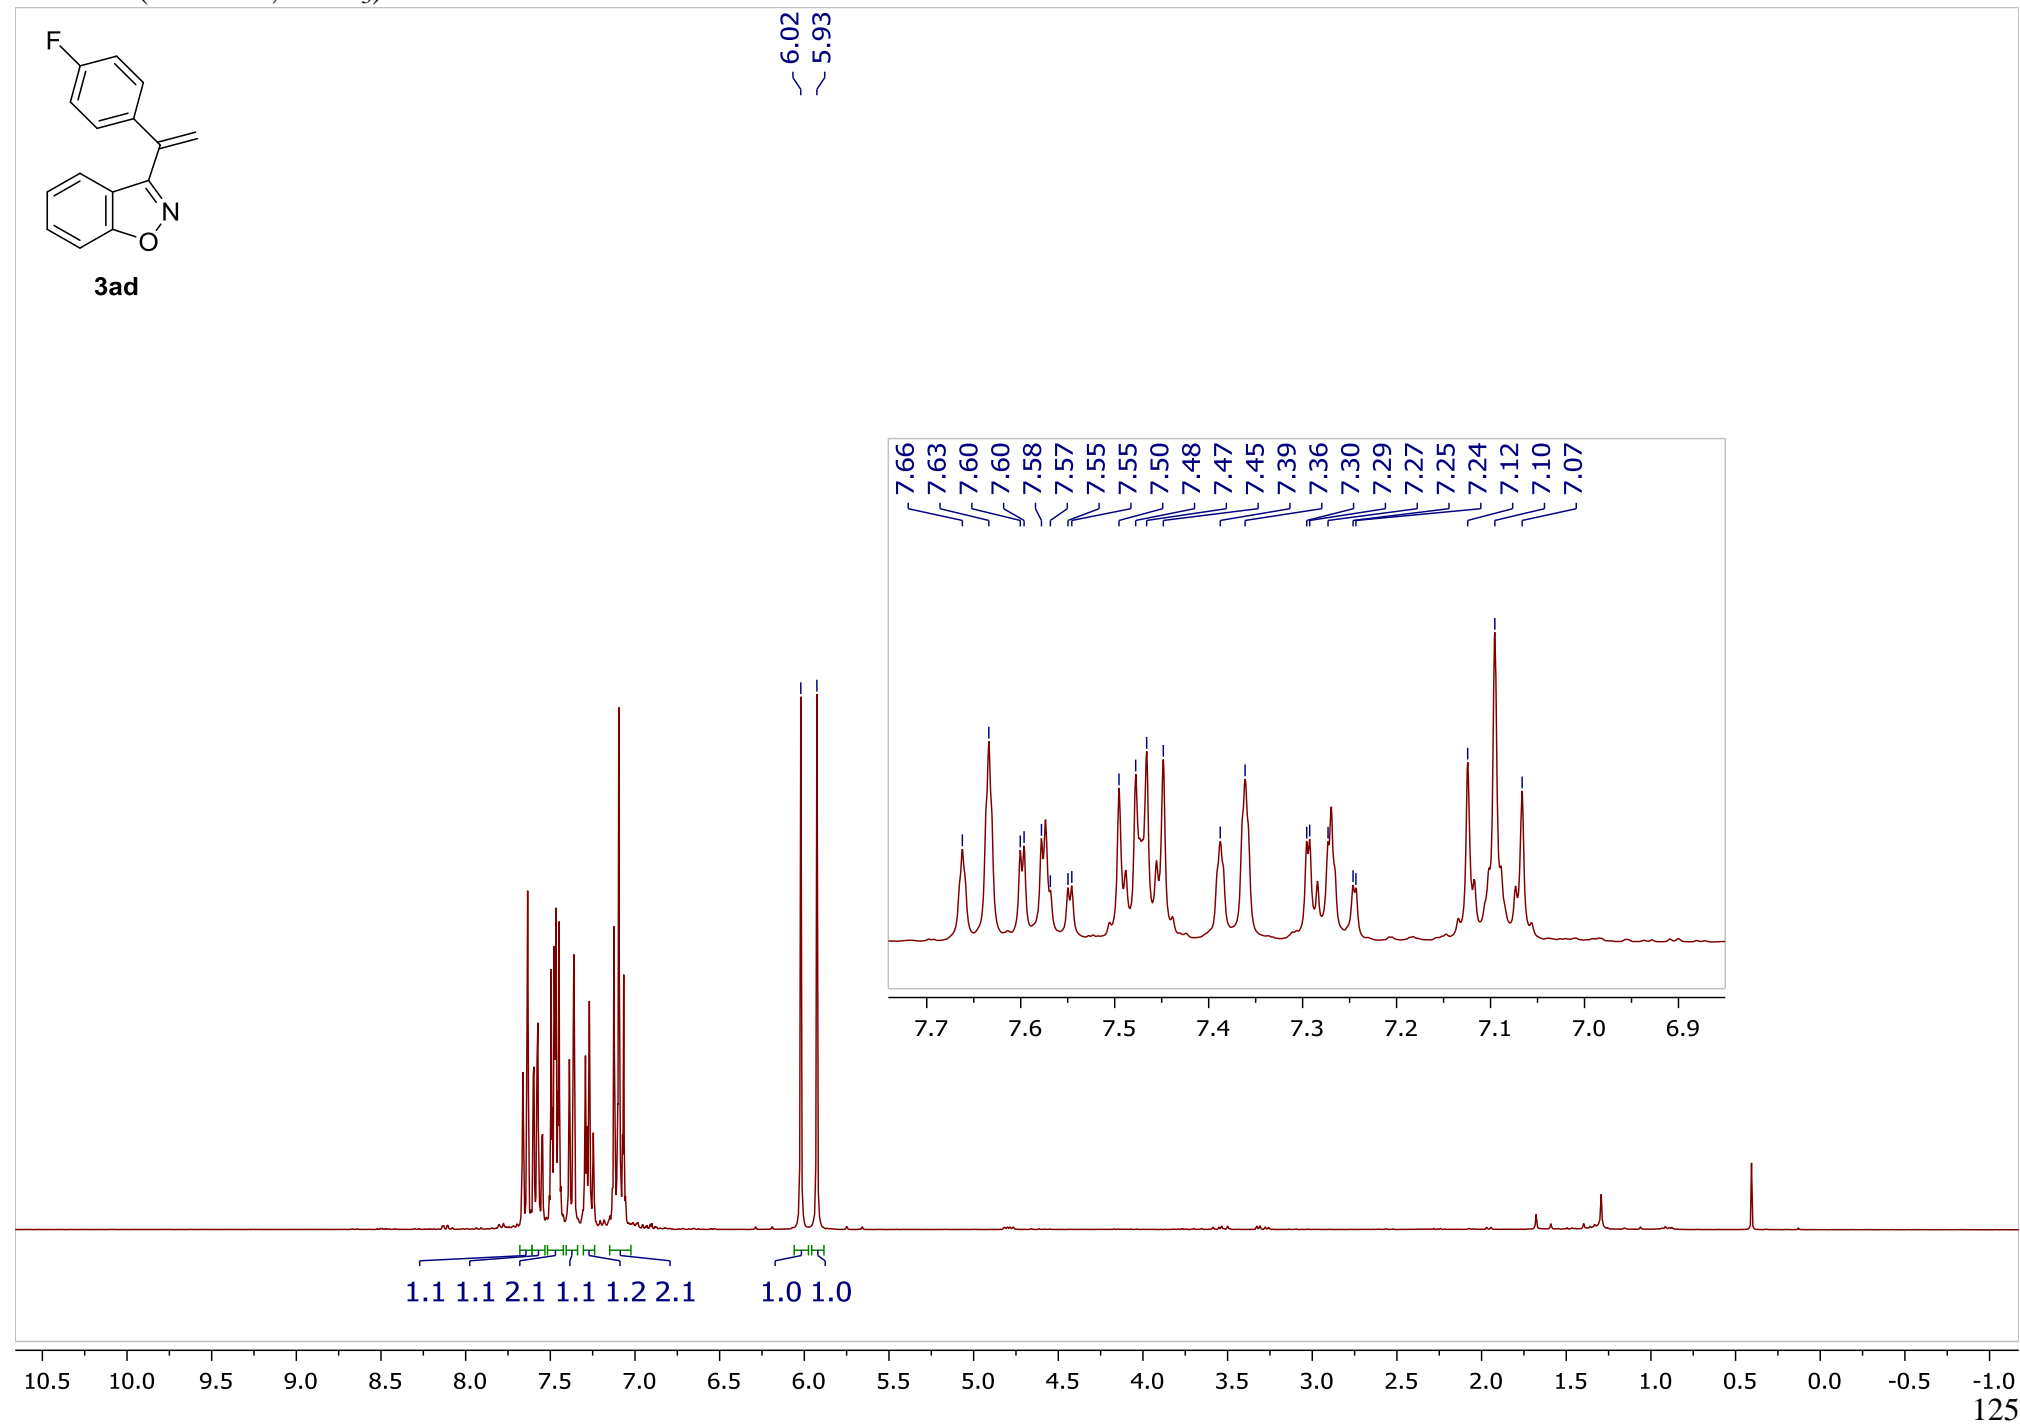

$^{13}\text{C}\{^1\text{H}\}$  NMR (75 MHz,  $\text{CDCl}_3$ )

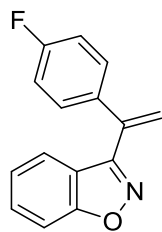

**3ad**

164.66  
163.54  
161.38  
157.73  
136.91  
134.32  
134.27  
129.87  
129.53  
129.42  
123.72  
122.43  
120.93  
120.19  
115.66  
115.38  
110.08

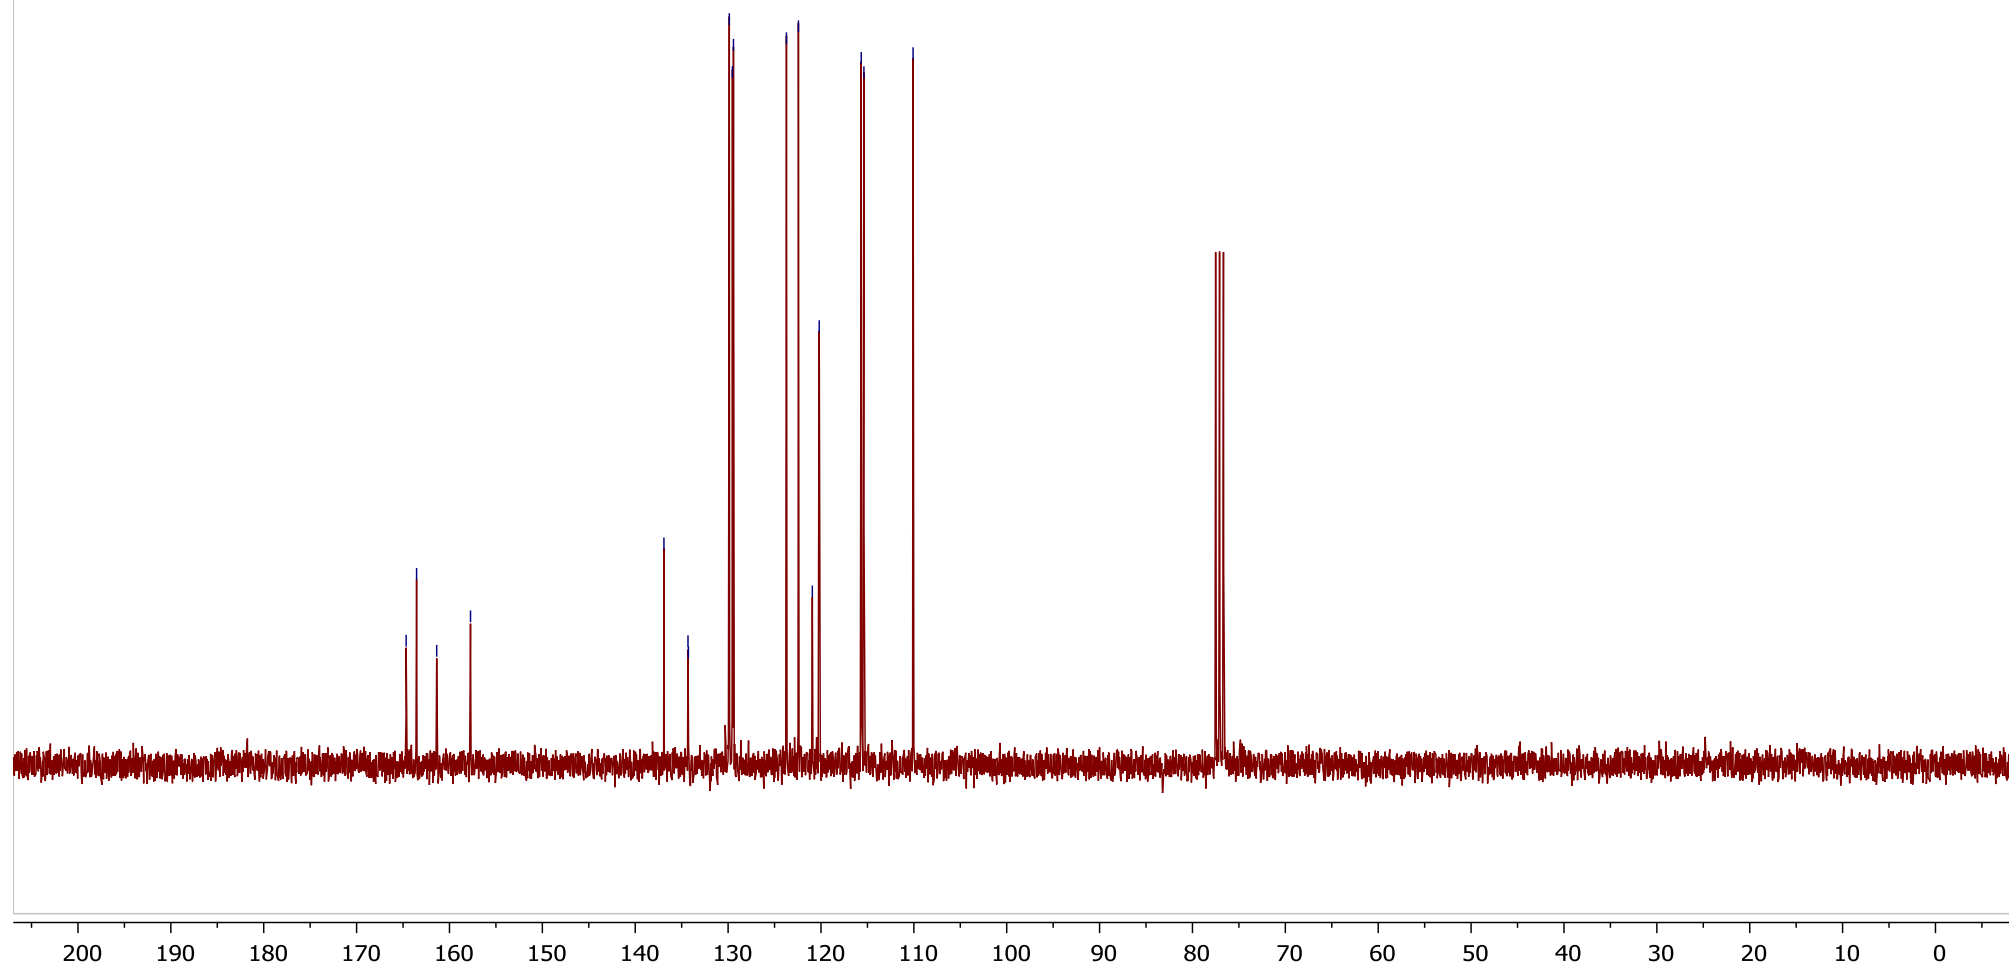

<sup>13</sup>C DEPT 135 (75 MHz, CDCl<sub>3</sub>)

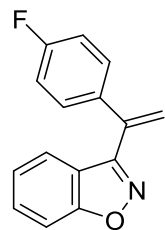

**3ad**

129.87  
129.53  
129.42  
123.72  
122.43  
120.19  
115.66  
115.38  
110.08

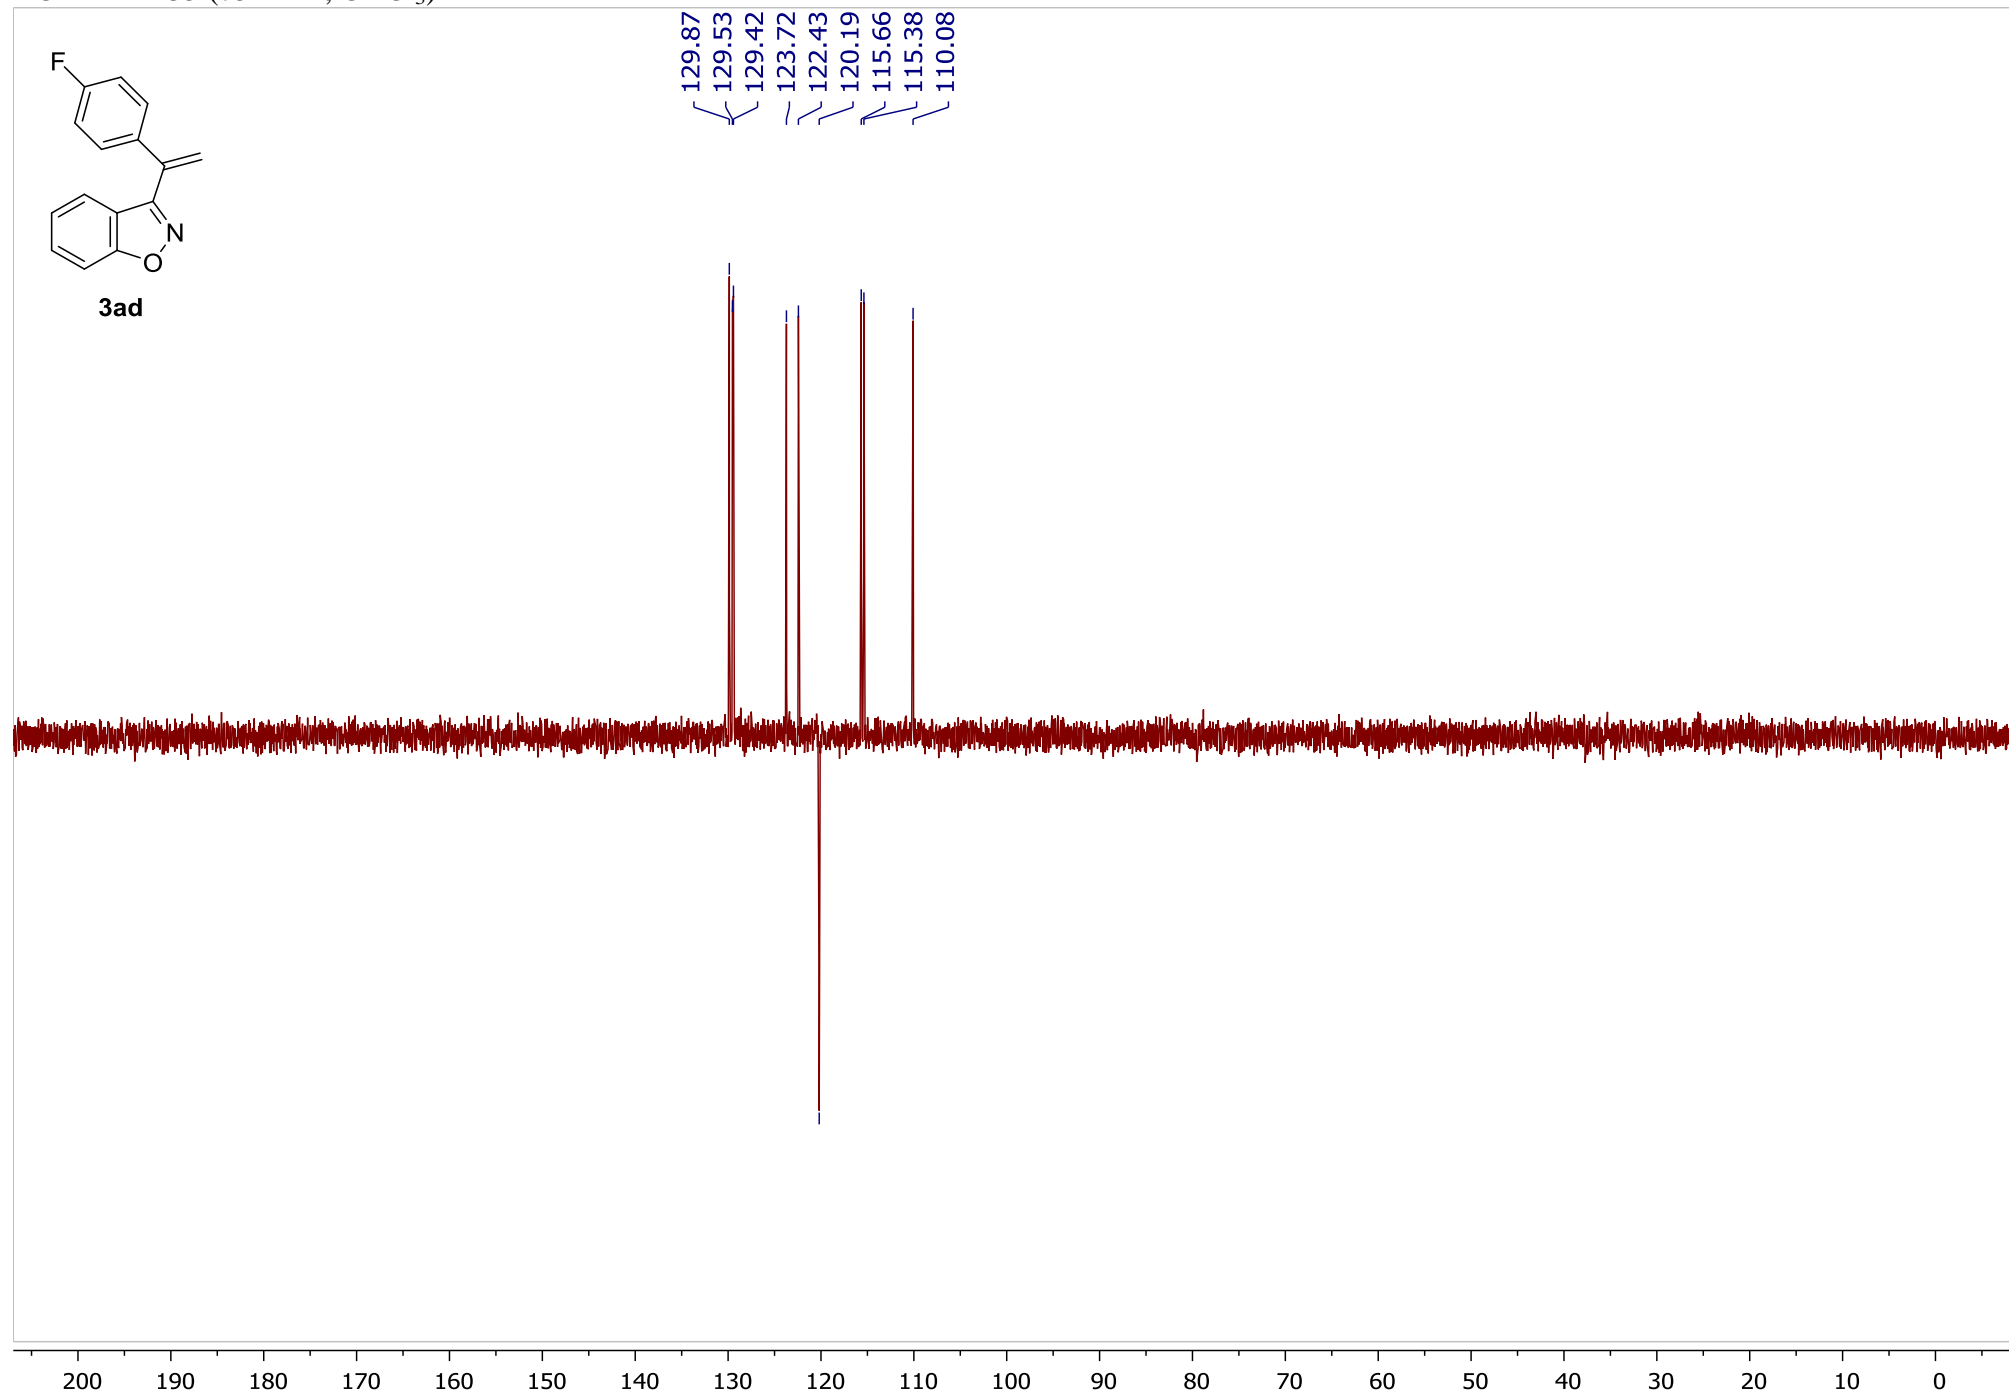

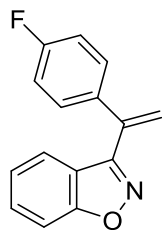

**3ad**

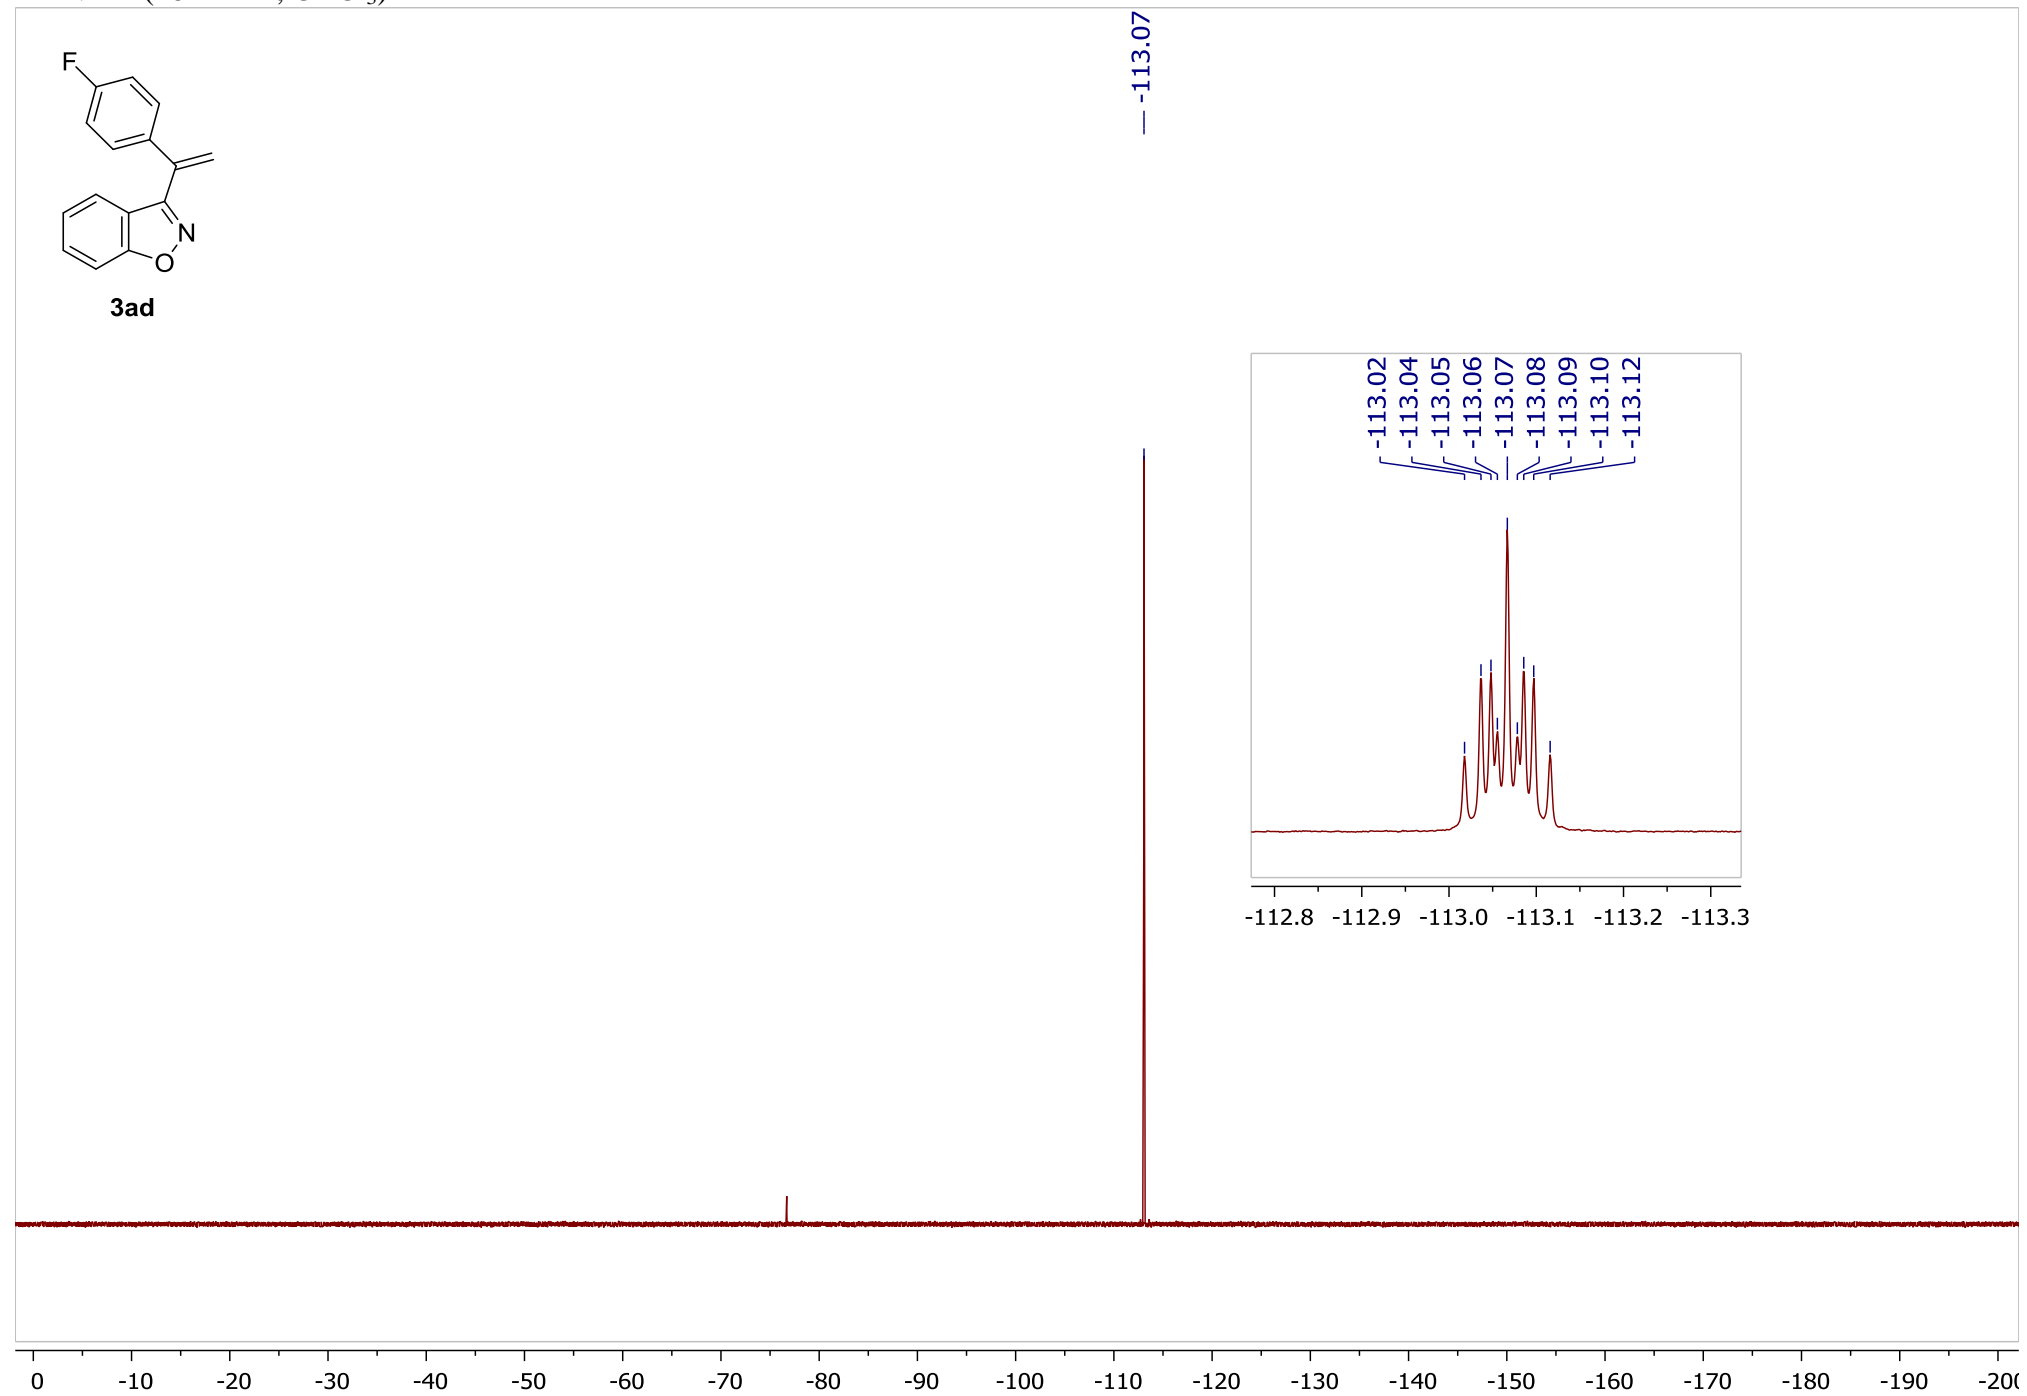



### 3-(1-(*p*-Tolyl)vinyl)benzo[d]isoxazole 3ae

<sup>1</sup>H NMR (300 MHz, CDCl<sub>3</sub>)

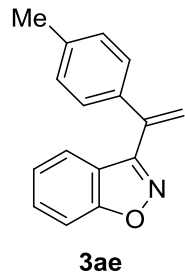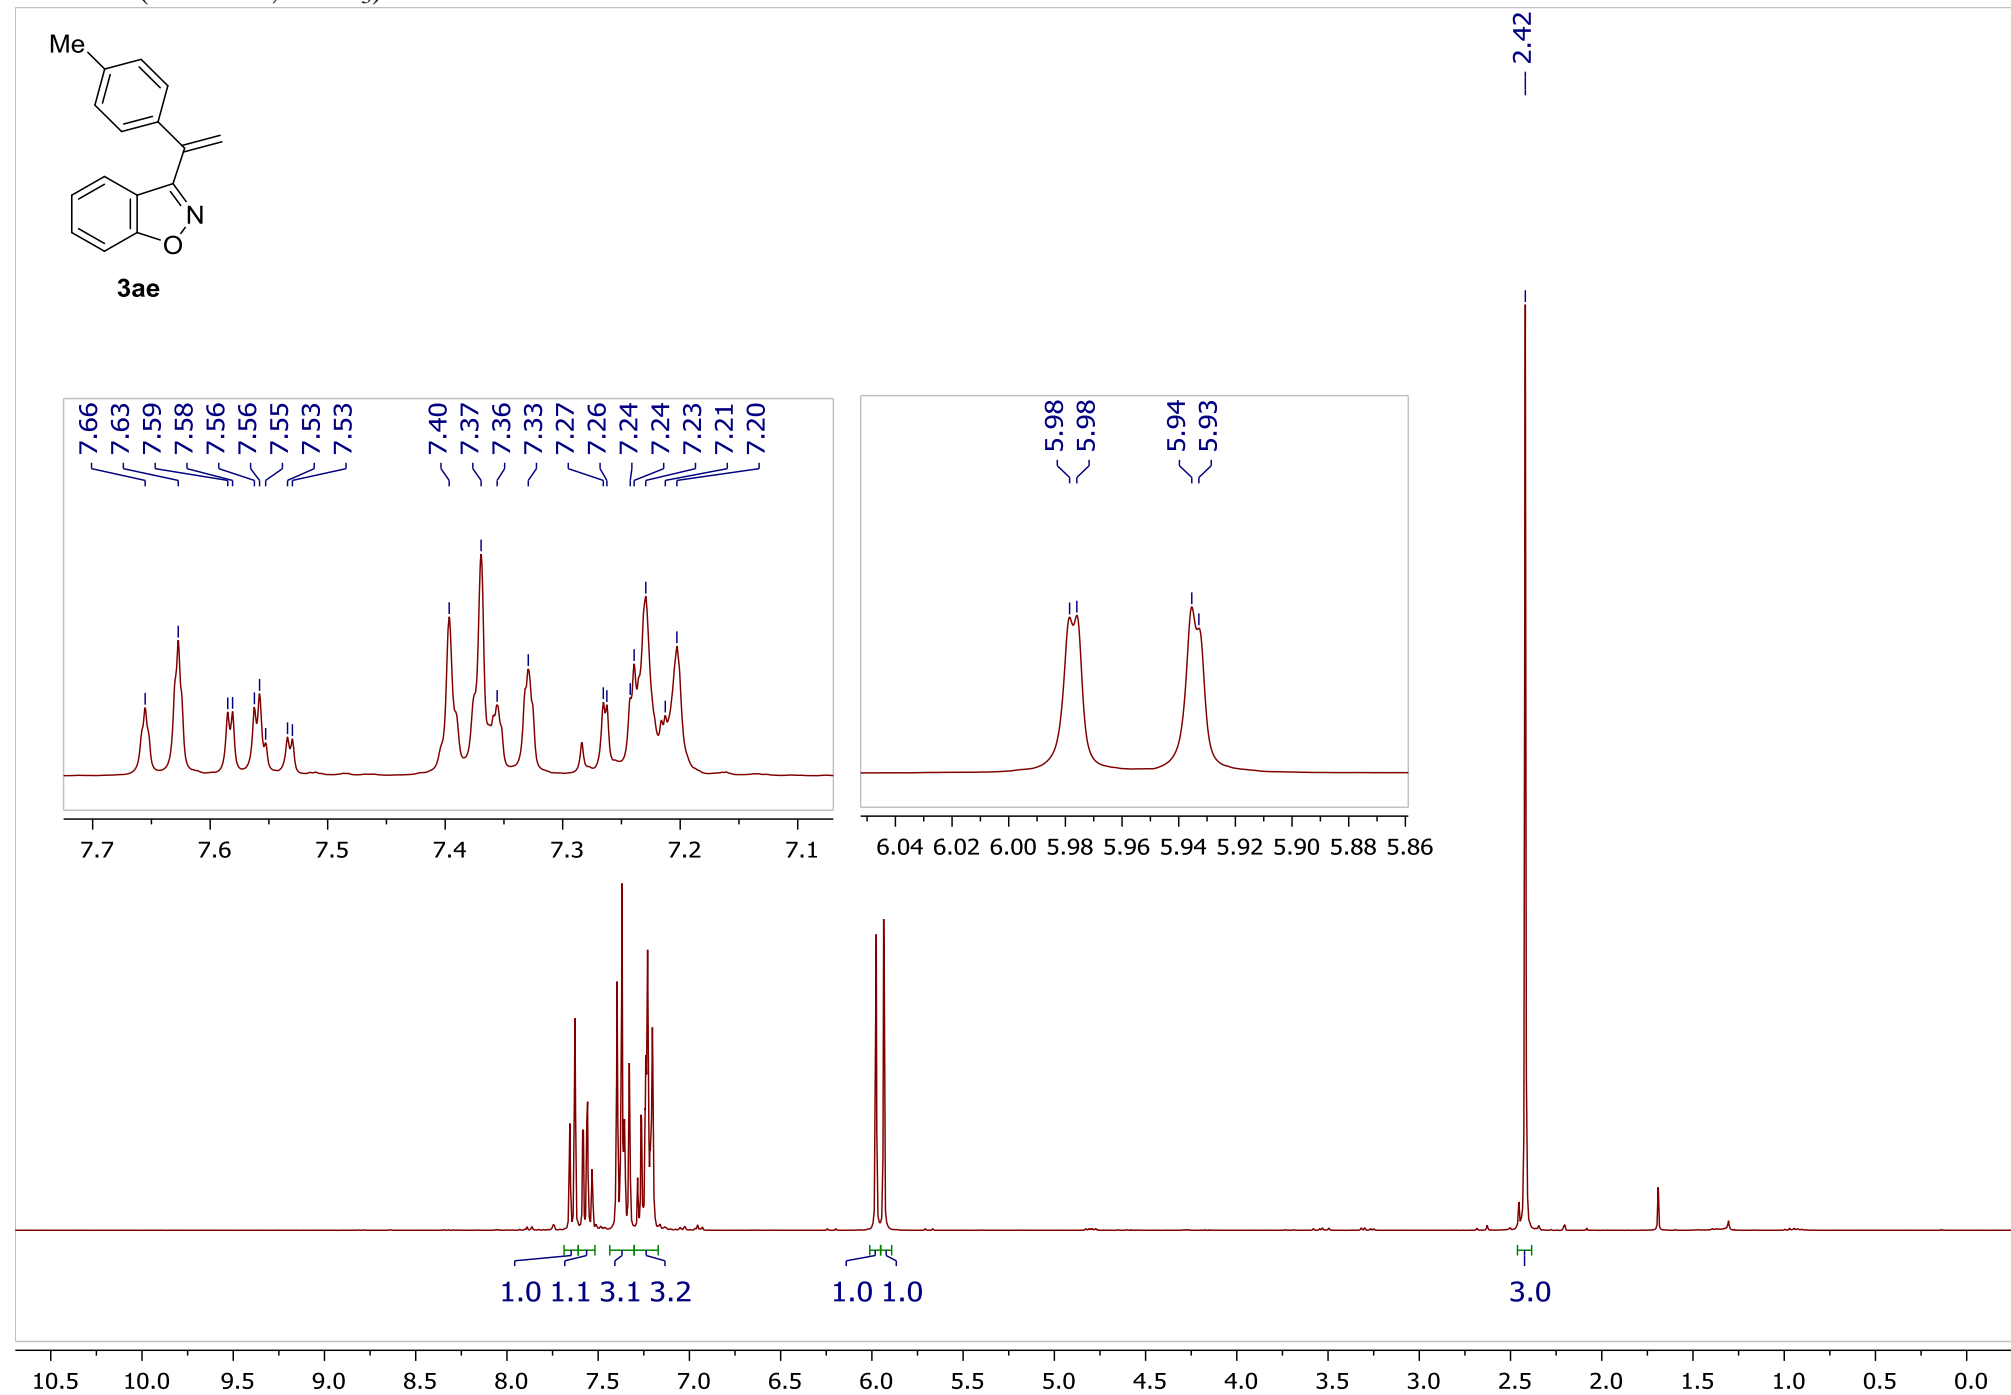

$^{13}\text{C}\{^1\text{H}\}$  NMR (75 MHz,  $\text{CDCl}_3$ )

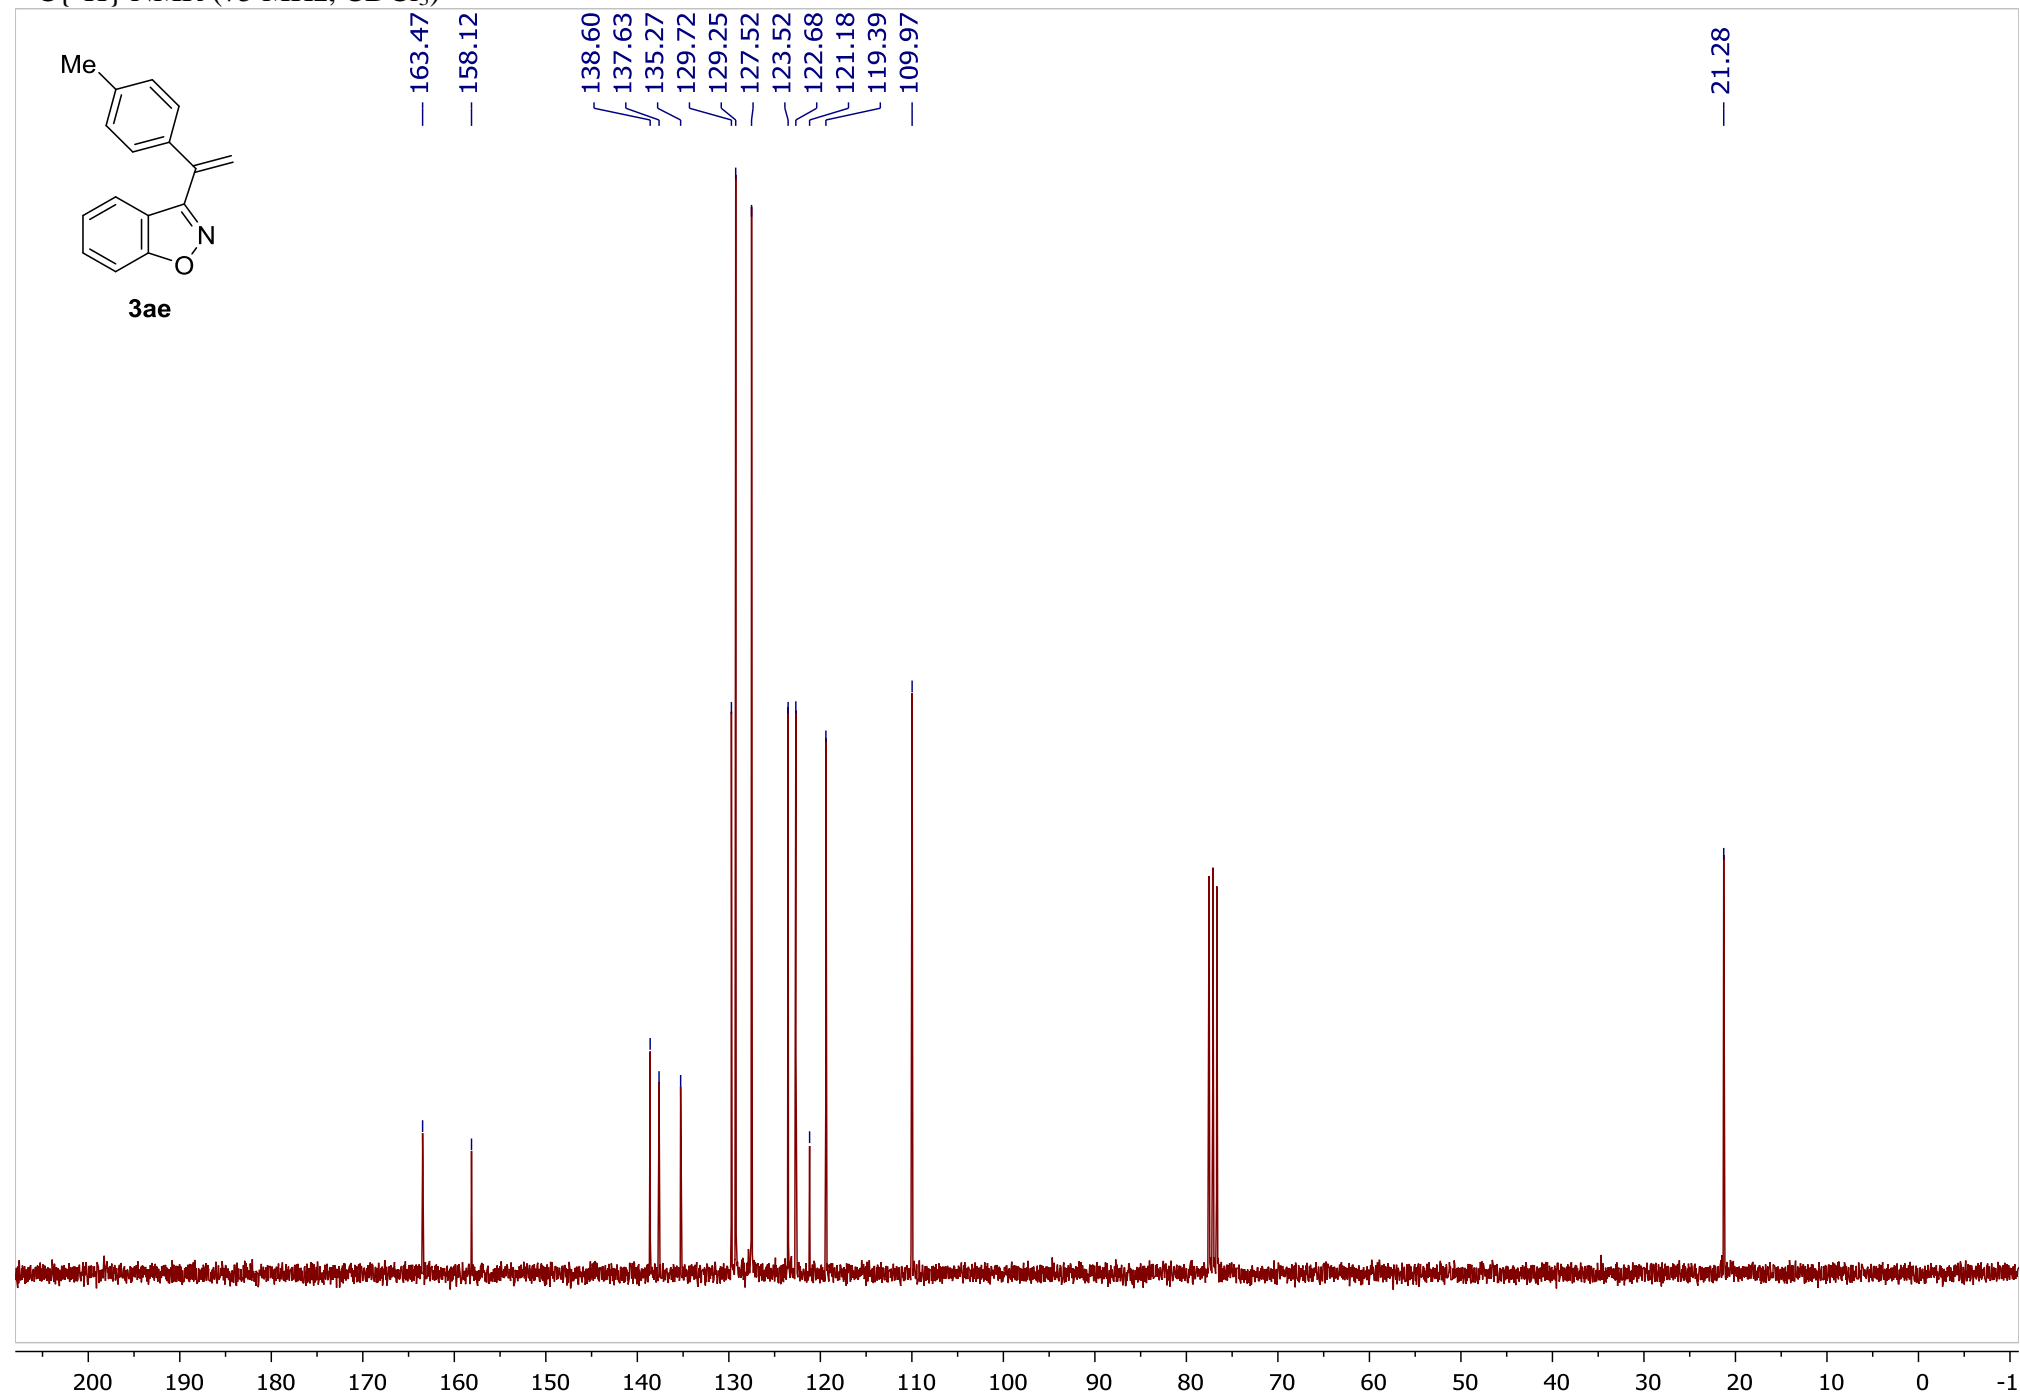

$^{13}\text{C}$  DEPT 135 (75 MHz,  $\text{CDCl}_3$ )

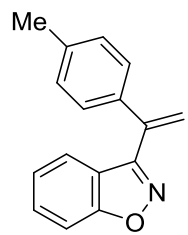

**3ae**

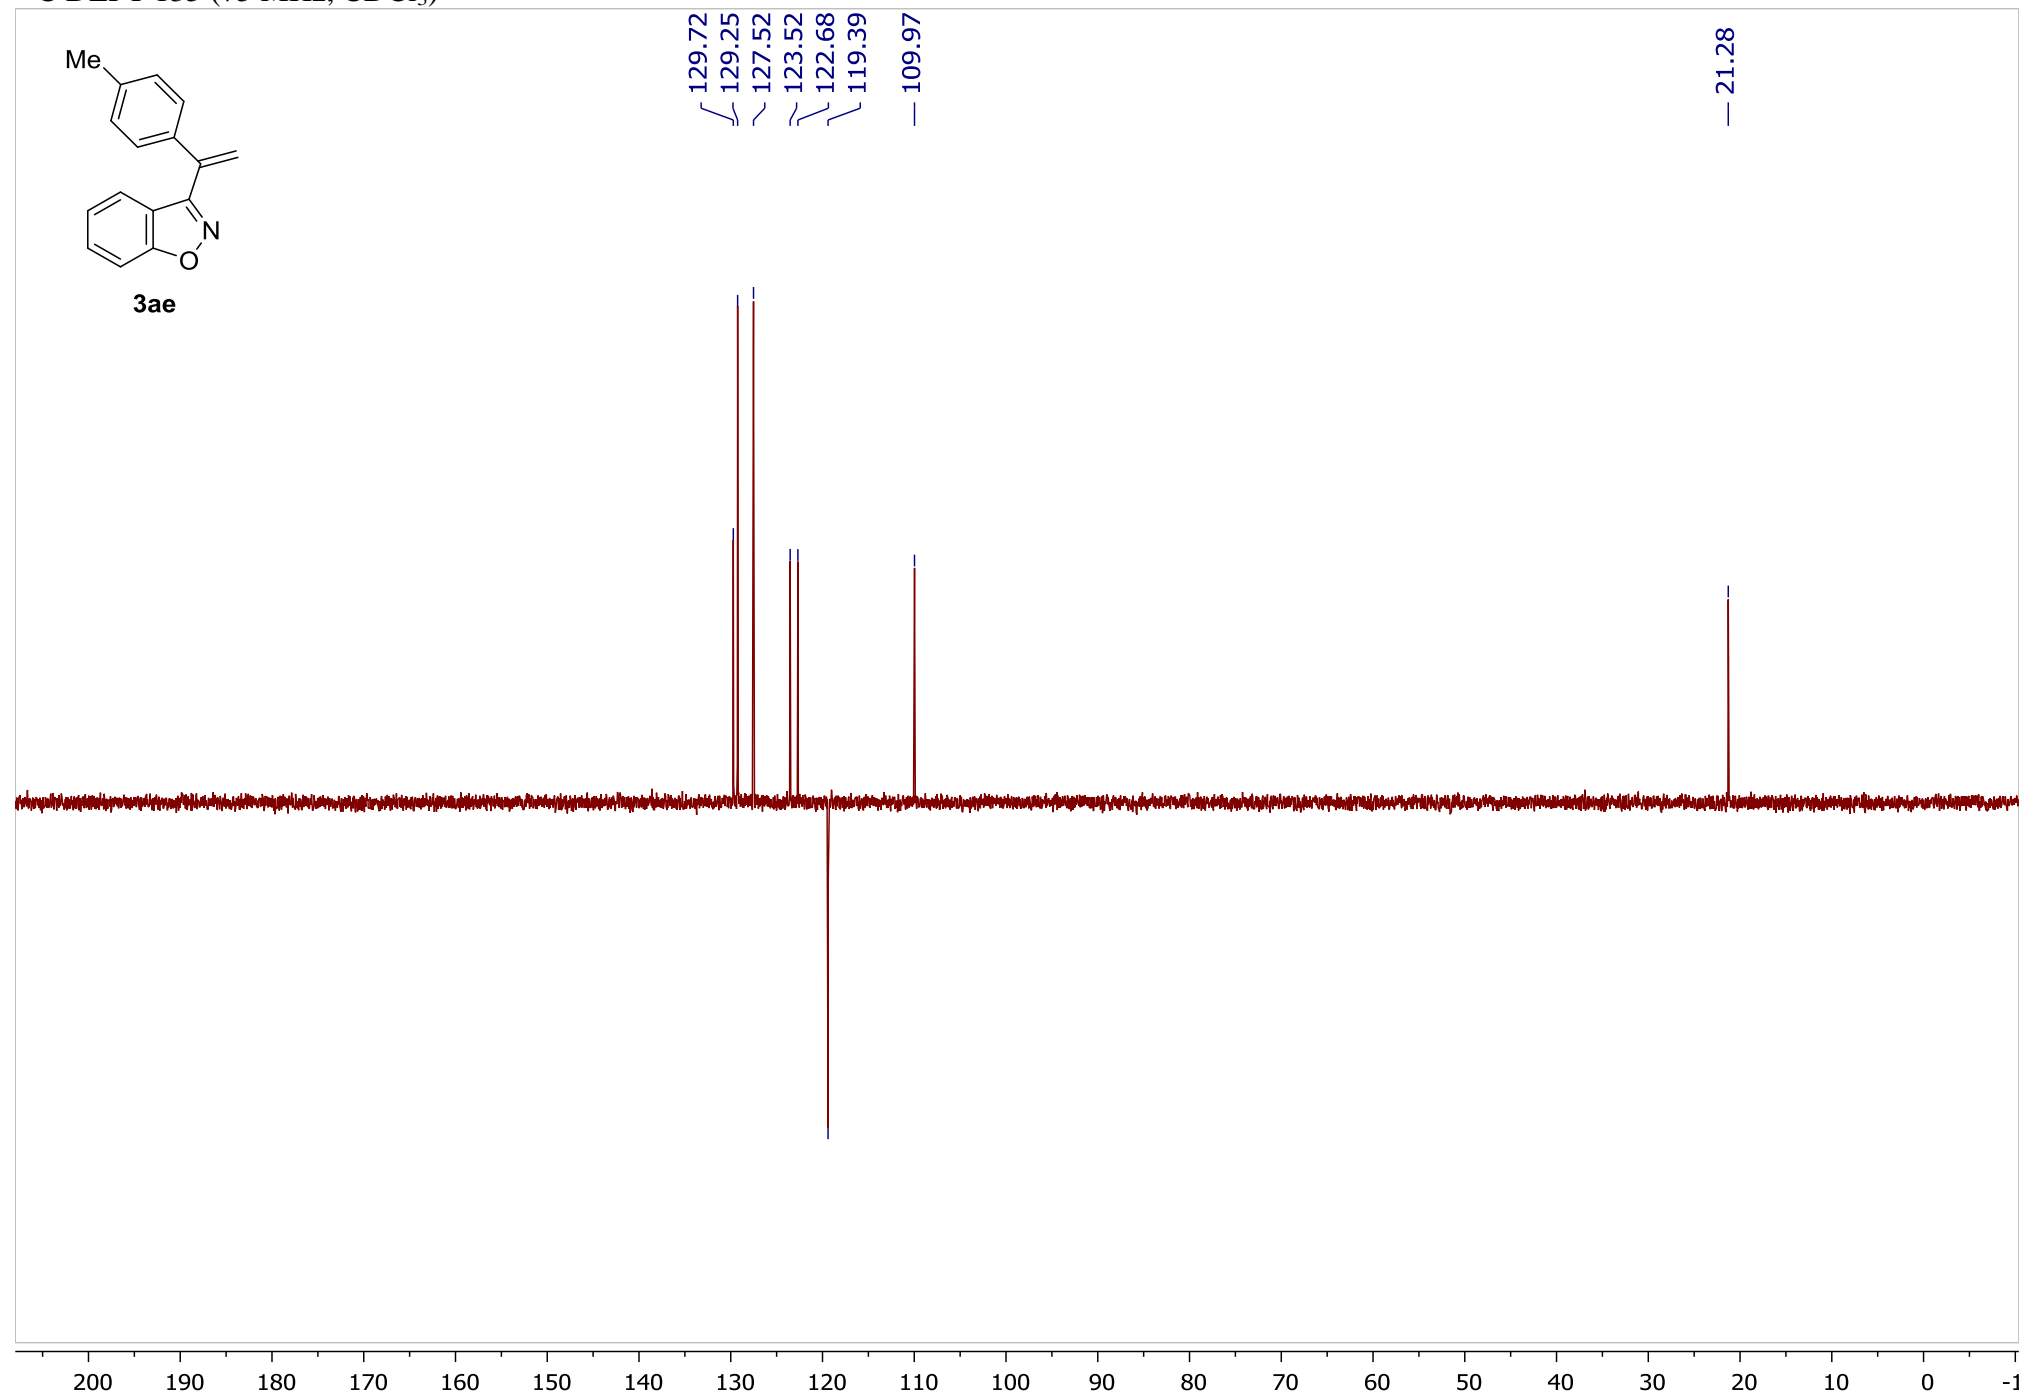

$^1\text{H}$ - $^1\text{H}$  COSY

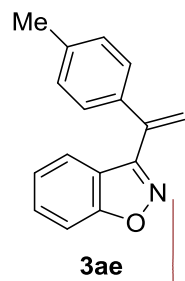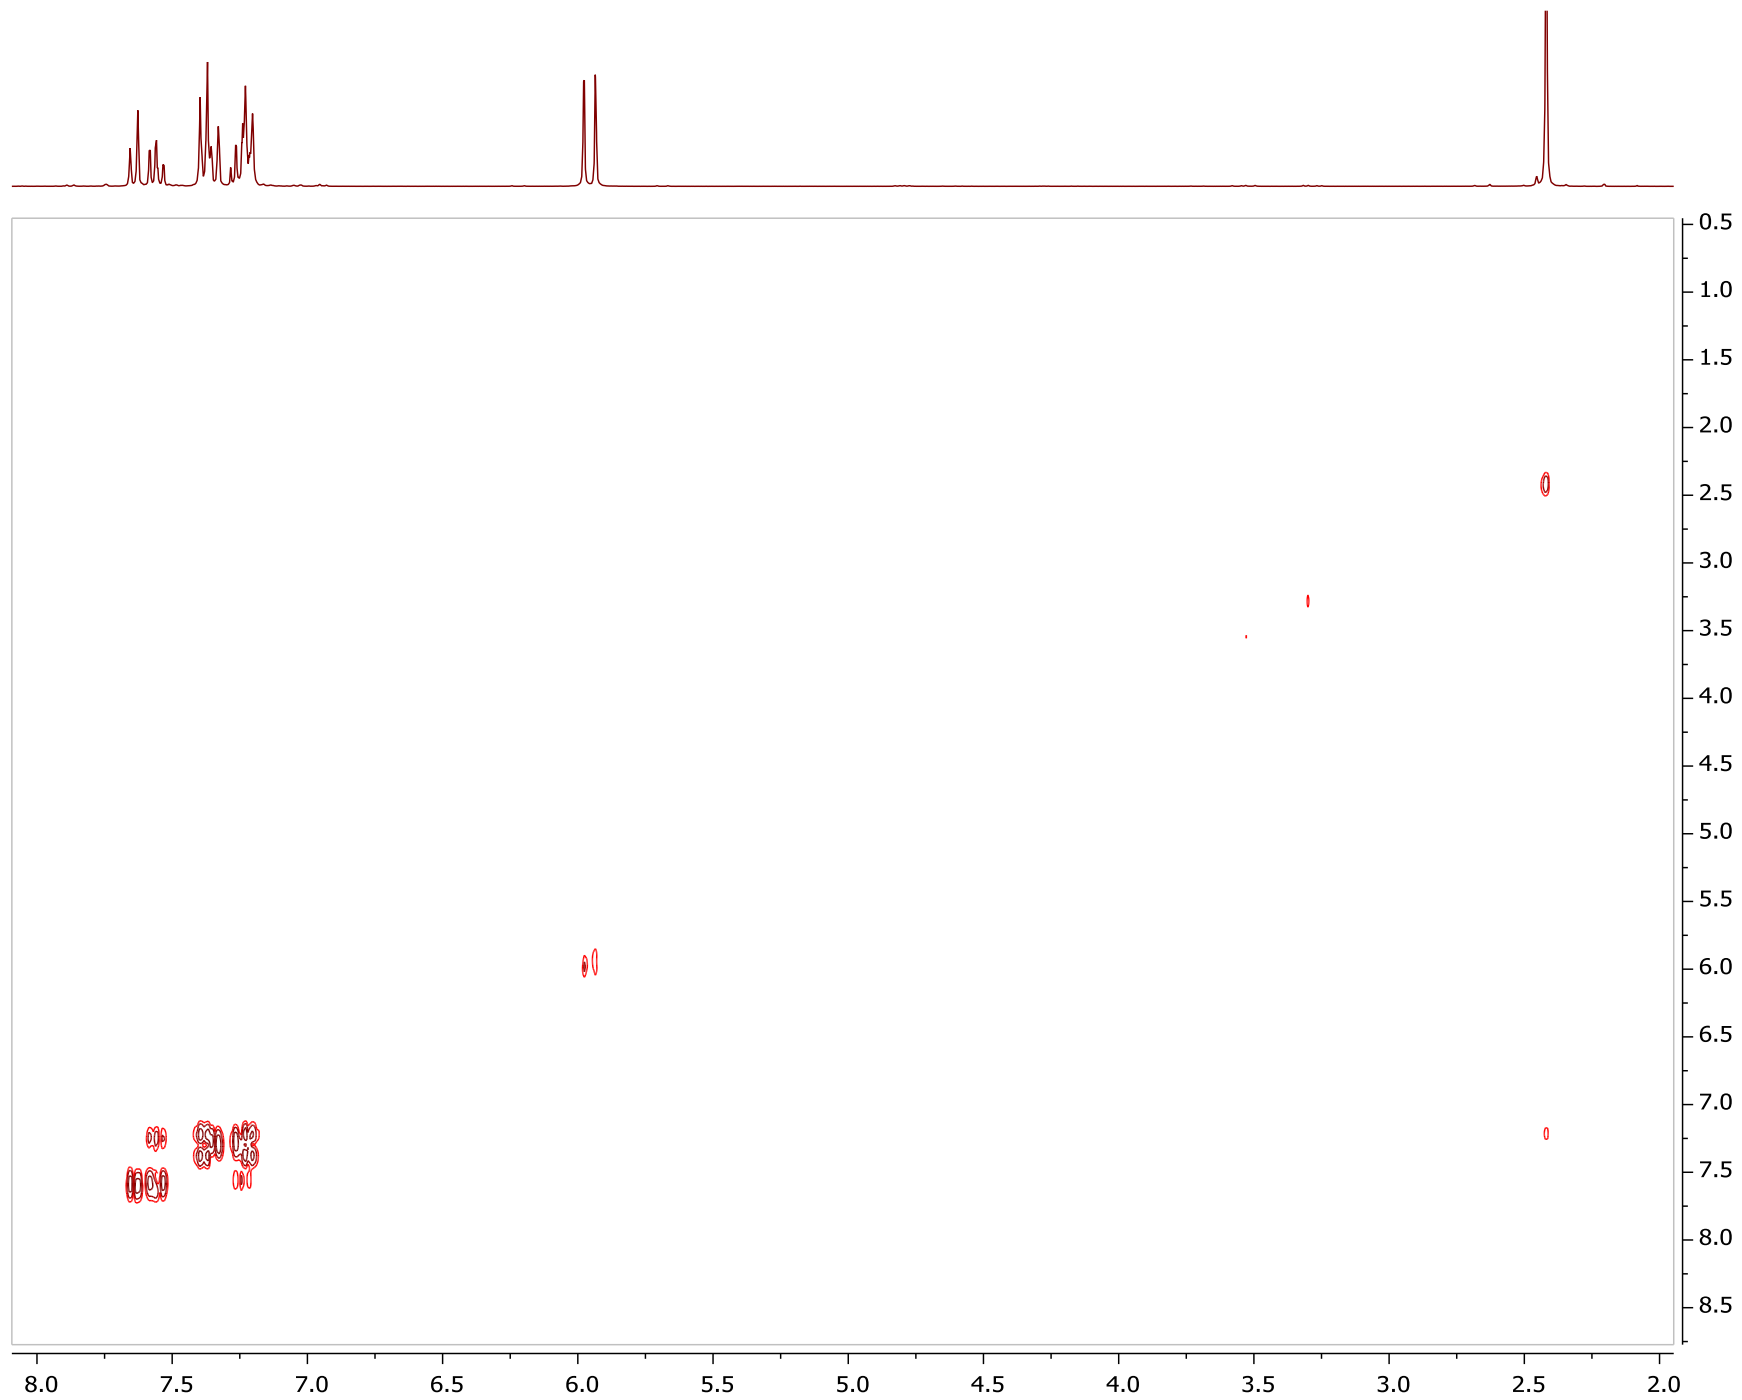

$^1\text{H}-^{13}\text{C}$  HSQC

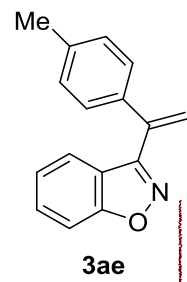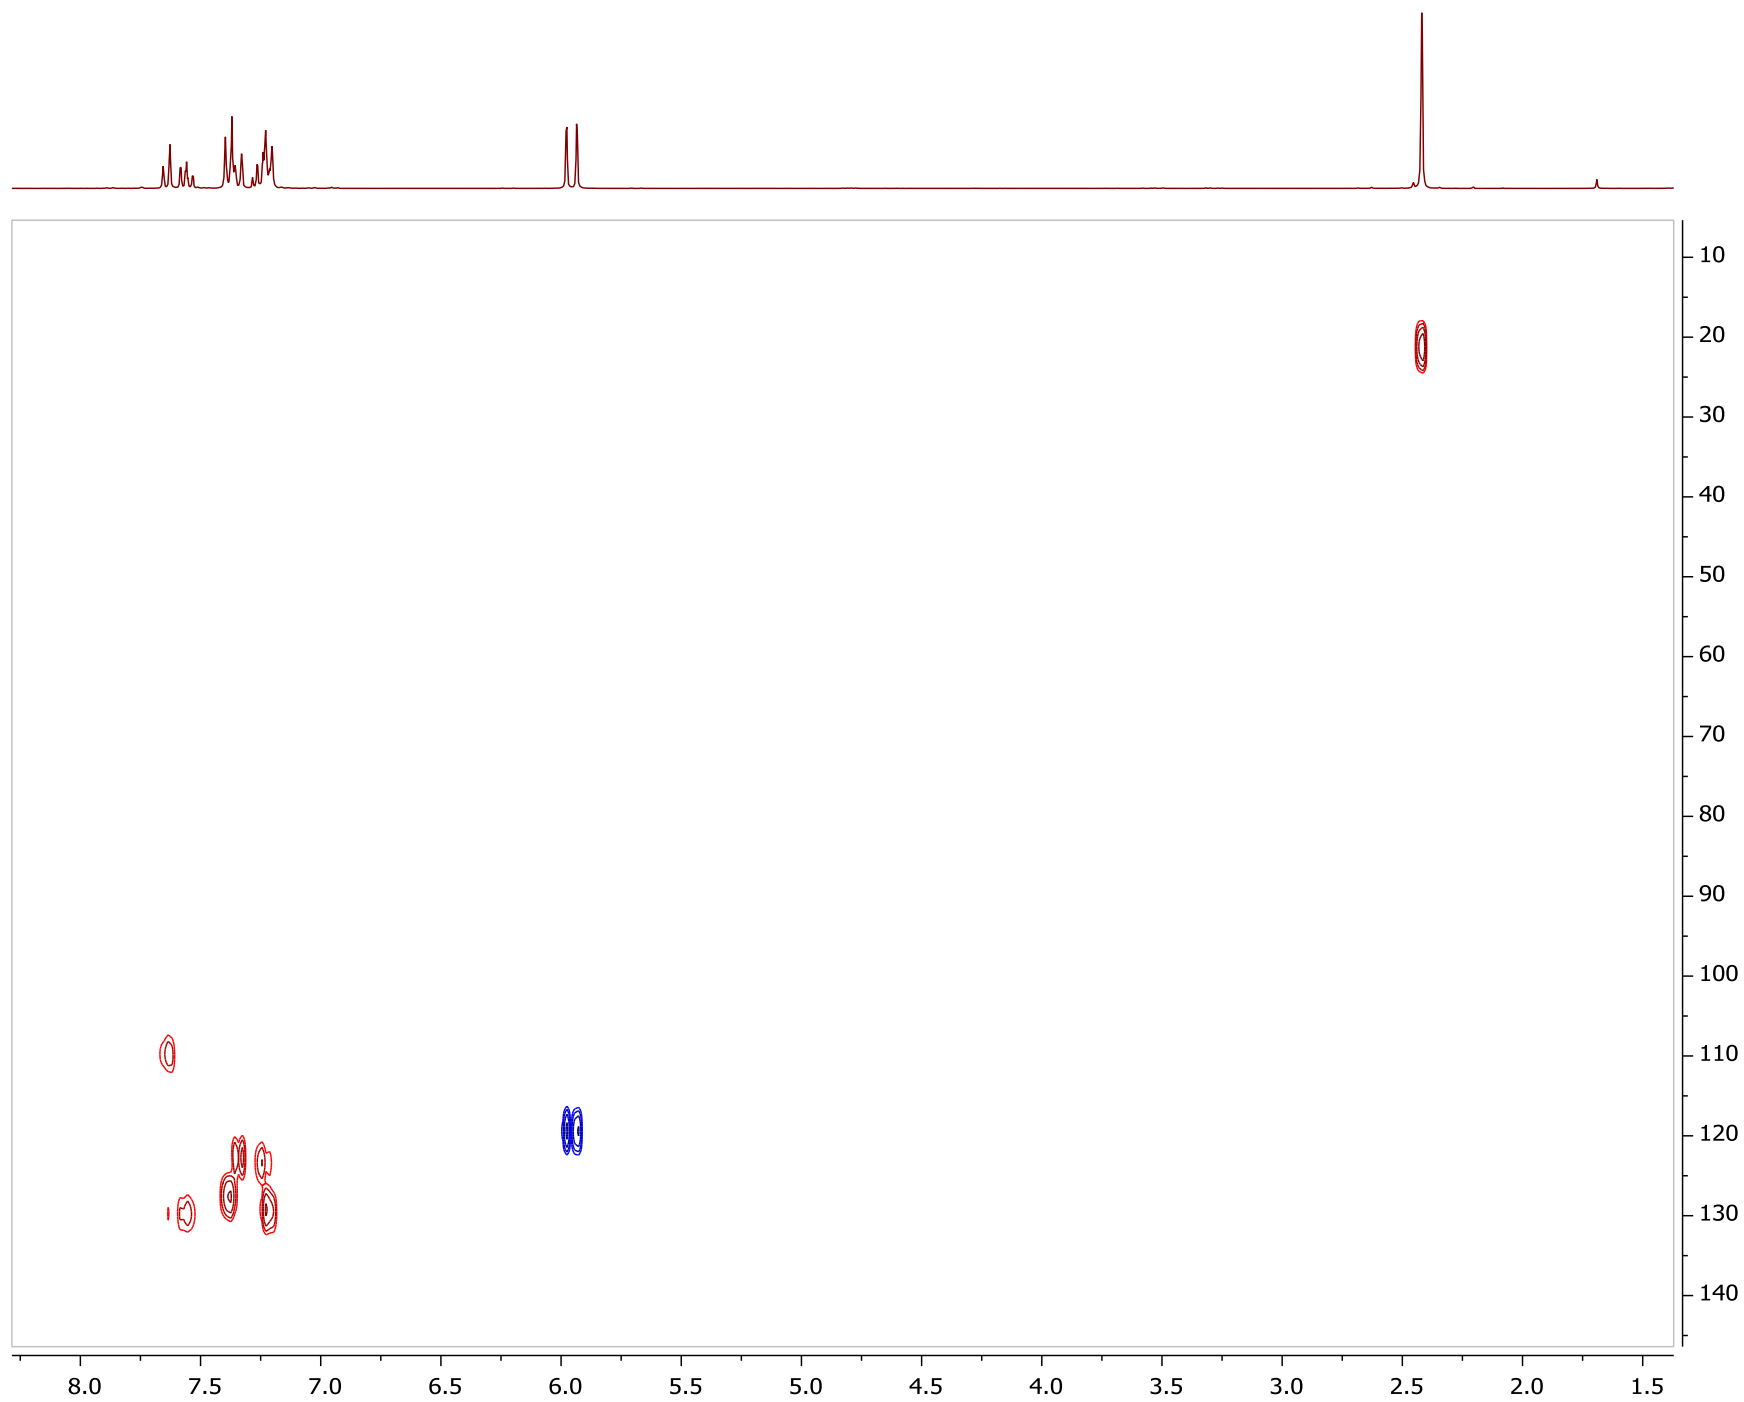

# Ethyl 2-(4-(1-(benzo[d]isoxazol-3-yl)vinyl)phenoxy)-2-methylpropanoate 3af

<sup>1</sup>H NMR (300 MHz, CDCl<sub>3</sub>)

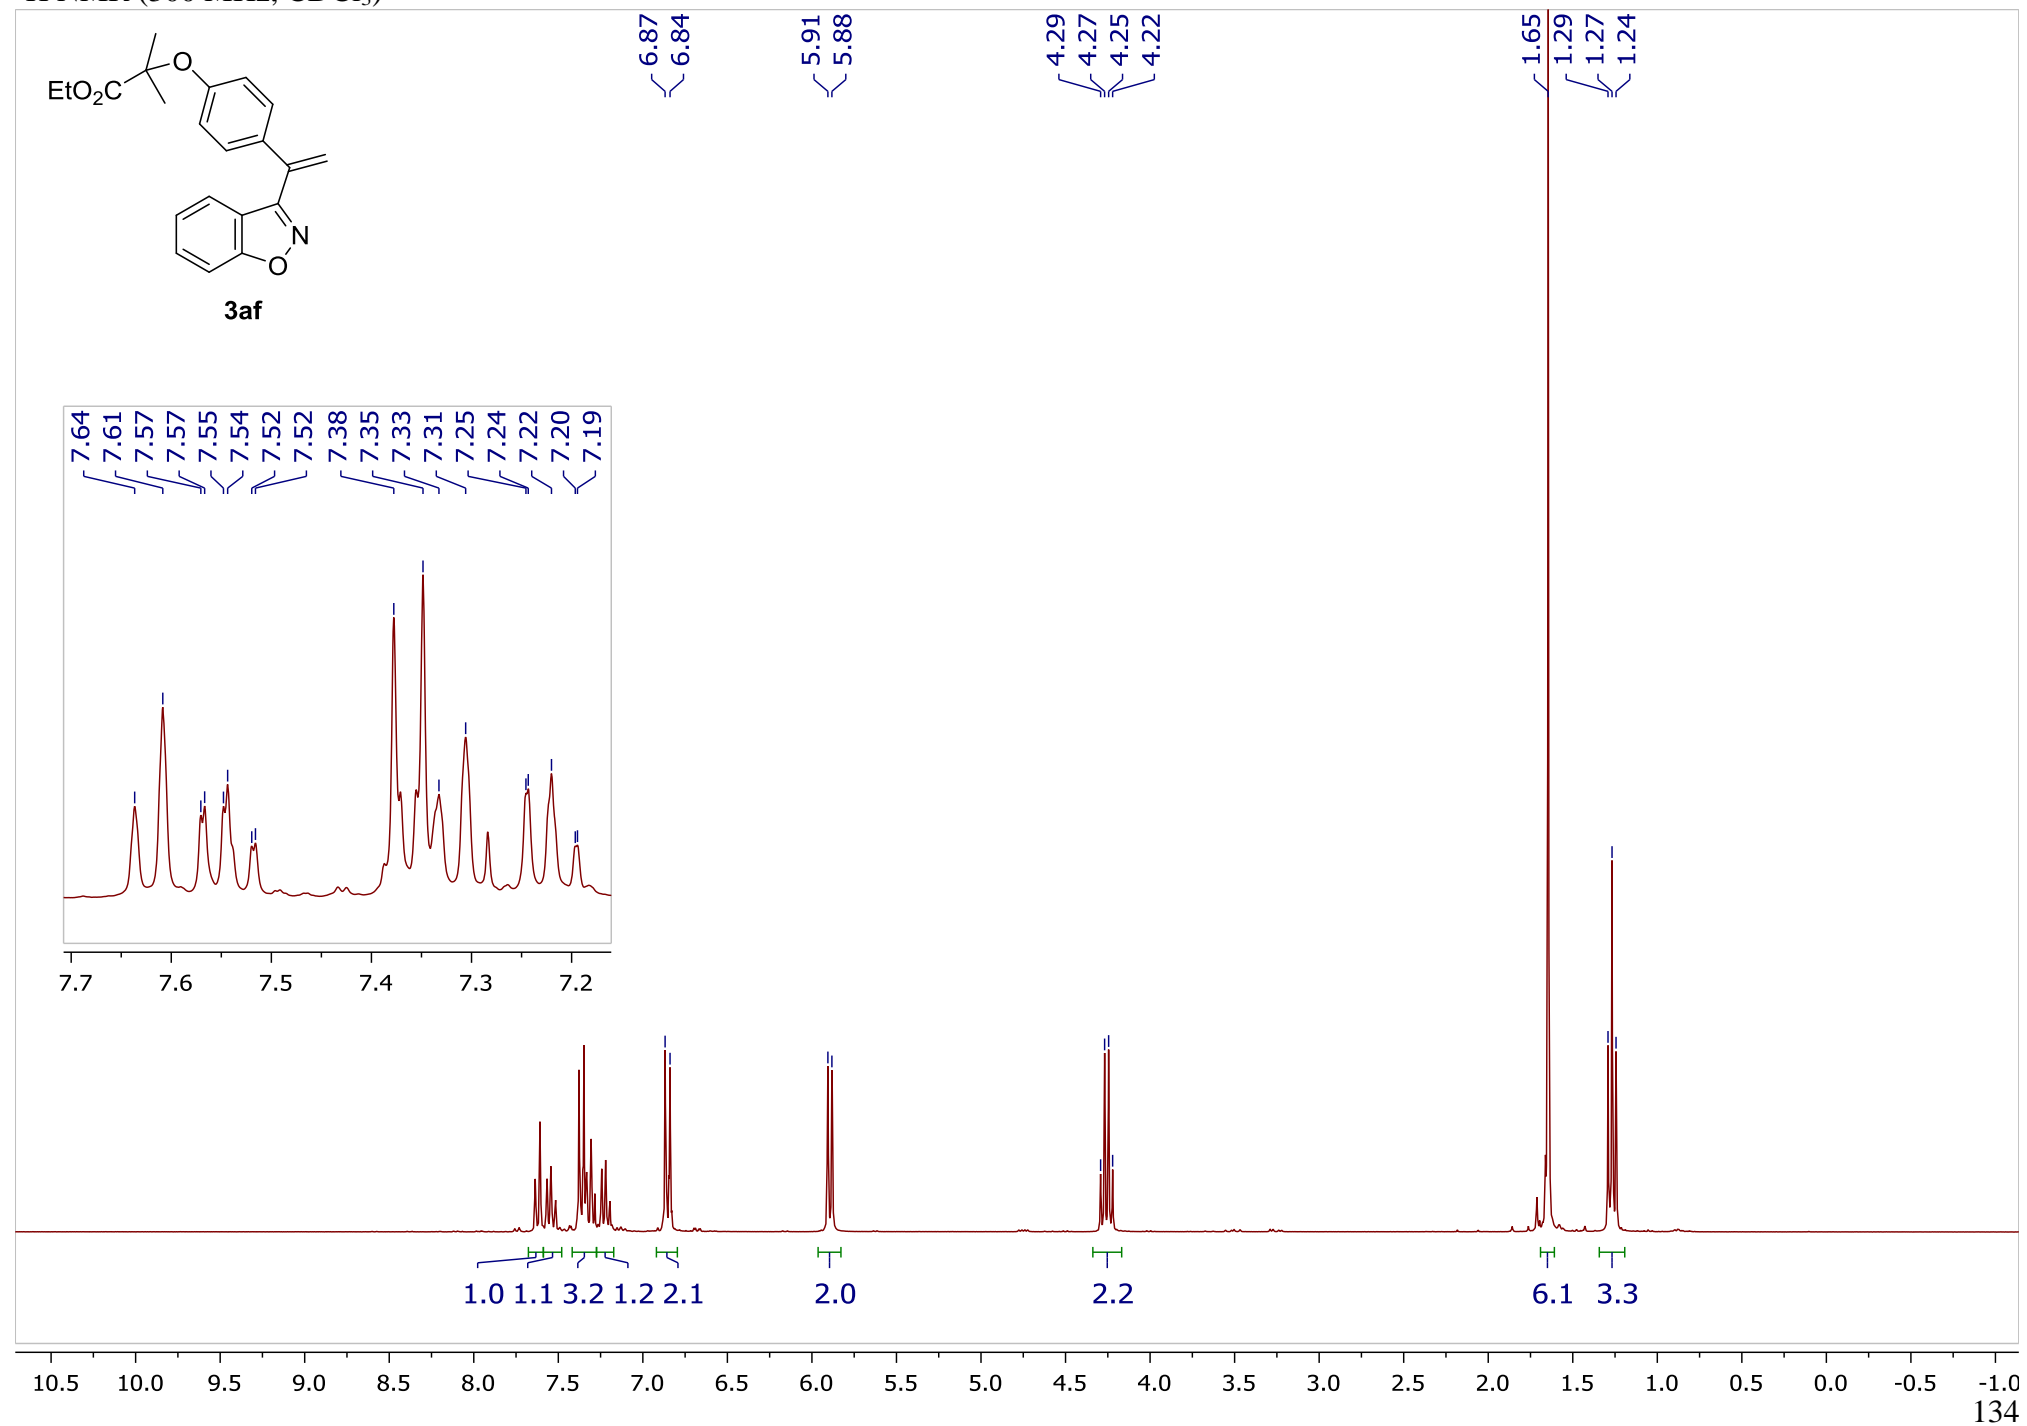

$^{13}\text{C}\{^1\text{H}\}$  NMR (75 MHz,  $\text{CDCl}_3$ )

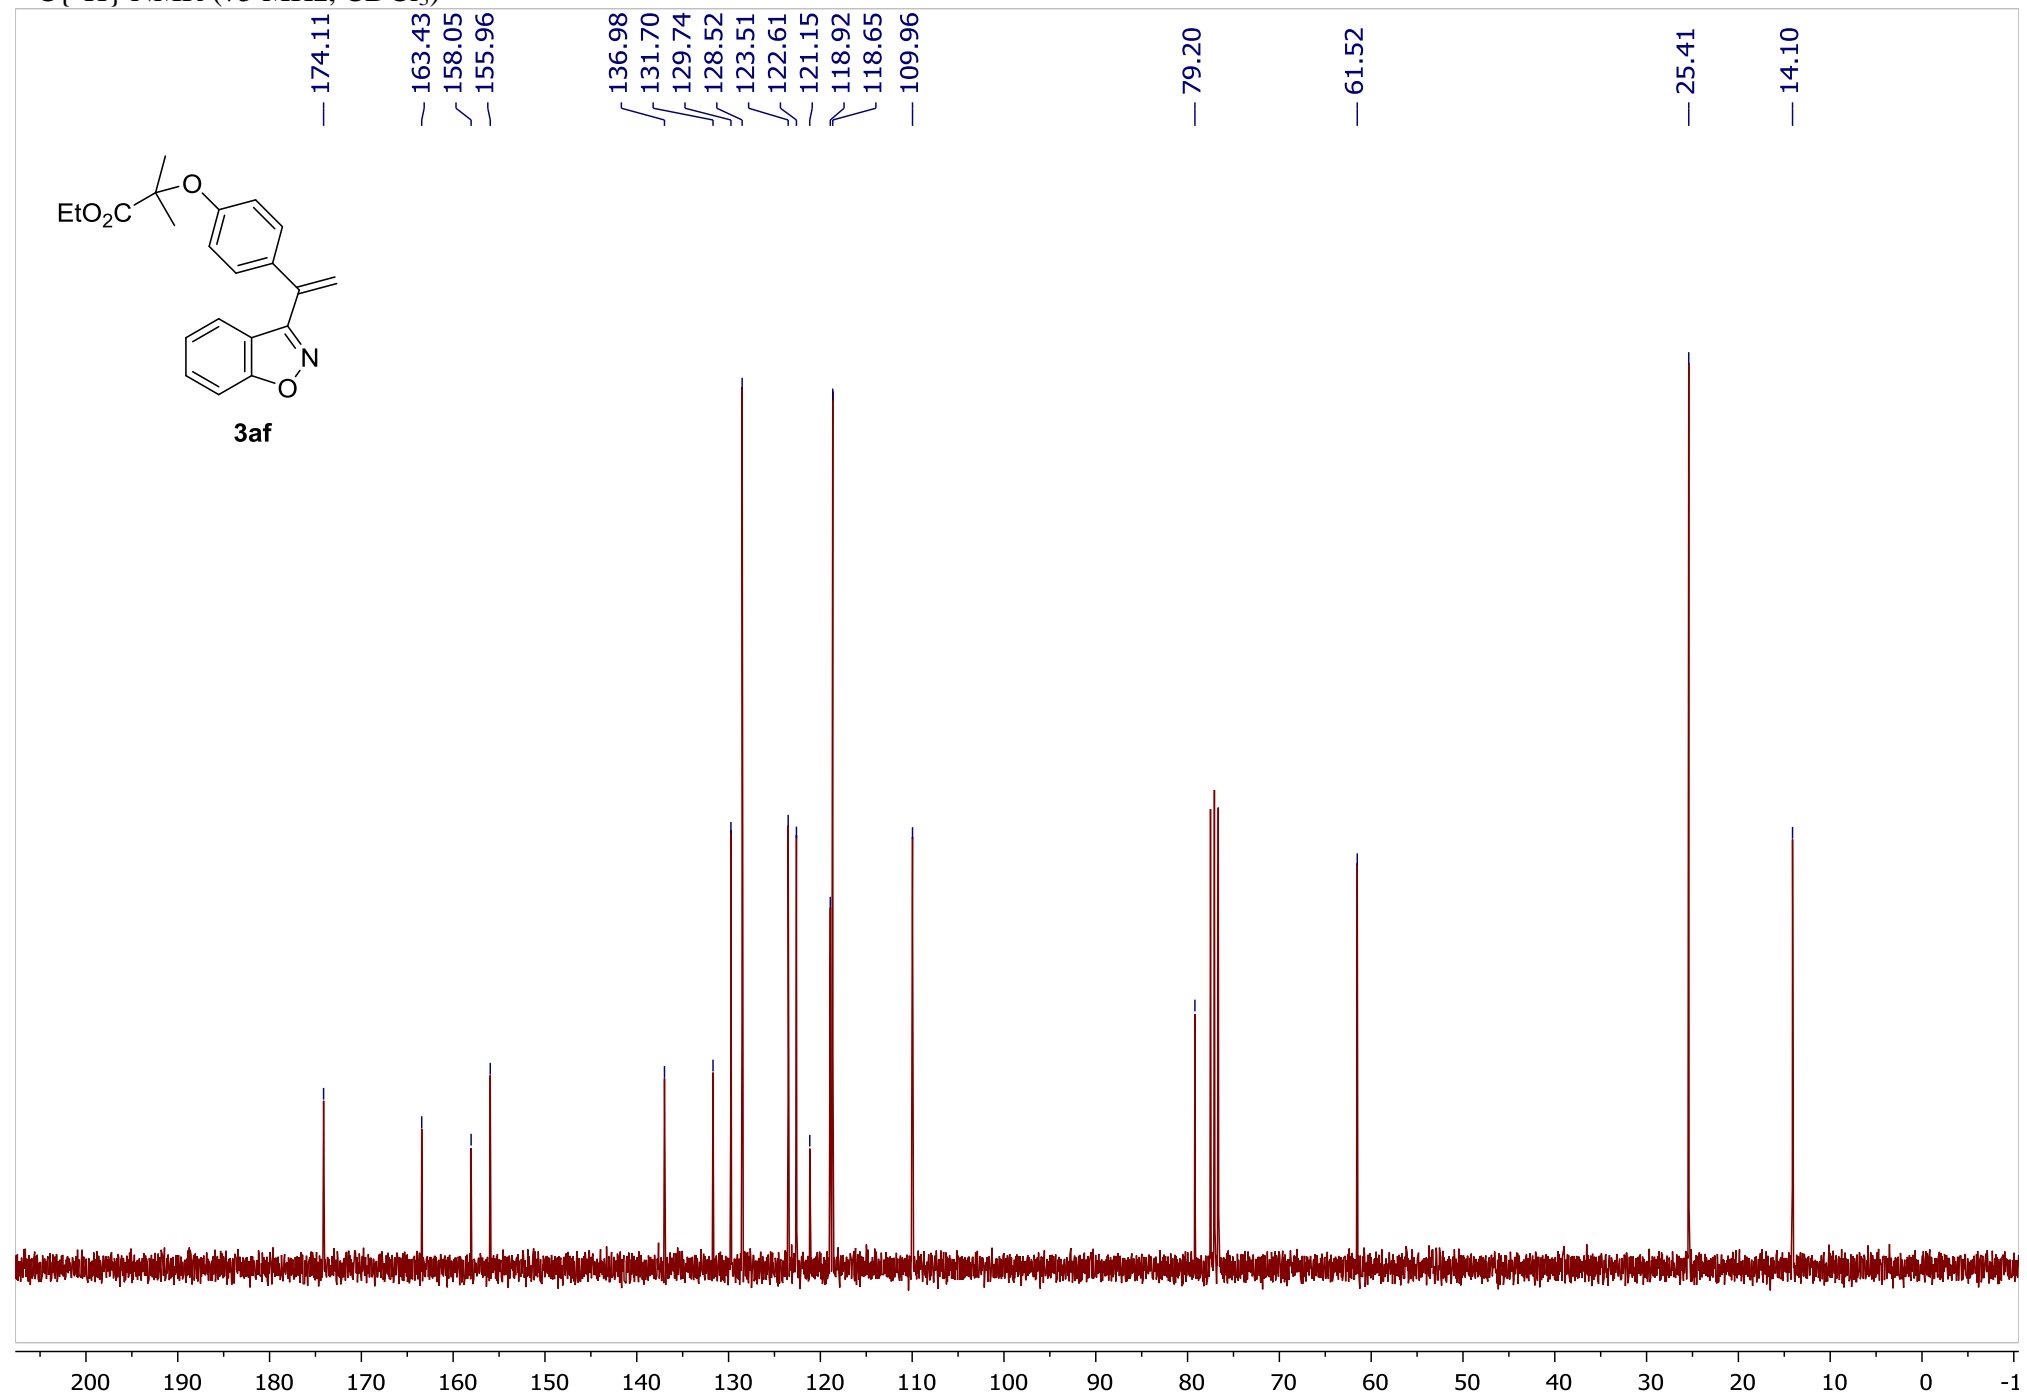

$^{13}\text{C}$  DEPT 135 (75 MHz,  $\text{CDCl}_3$ )

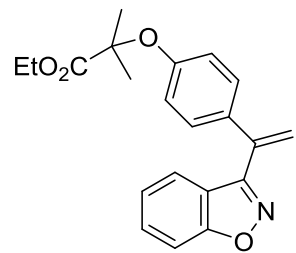

**3af**

129.74  
128.52  
123.51  
122.61  
118.92  
118.65

109.96

61.52

25.41

14.10

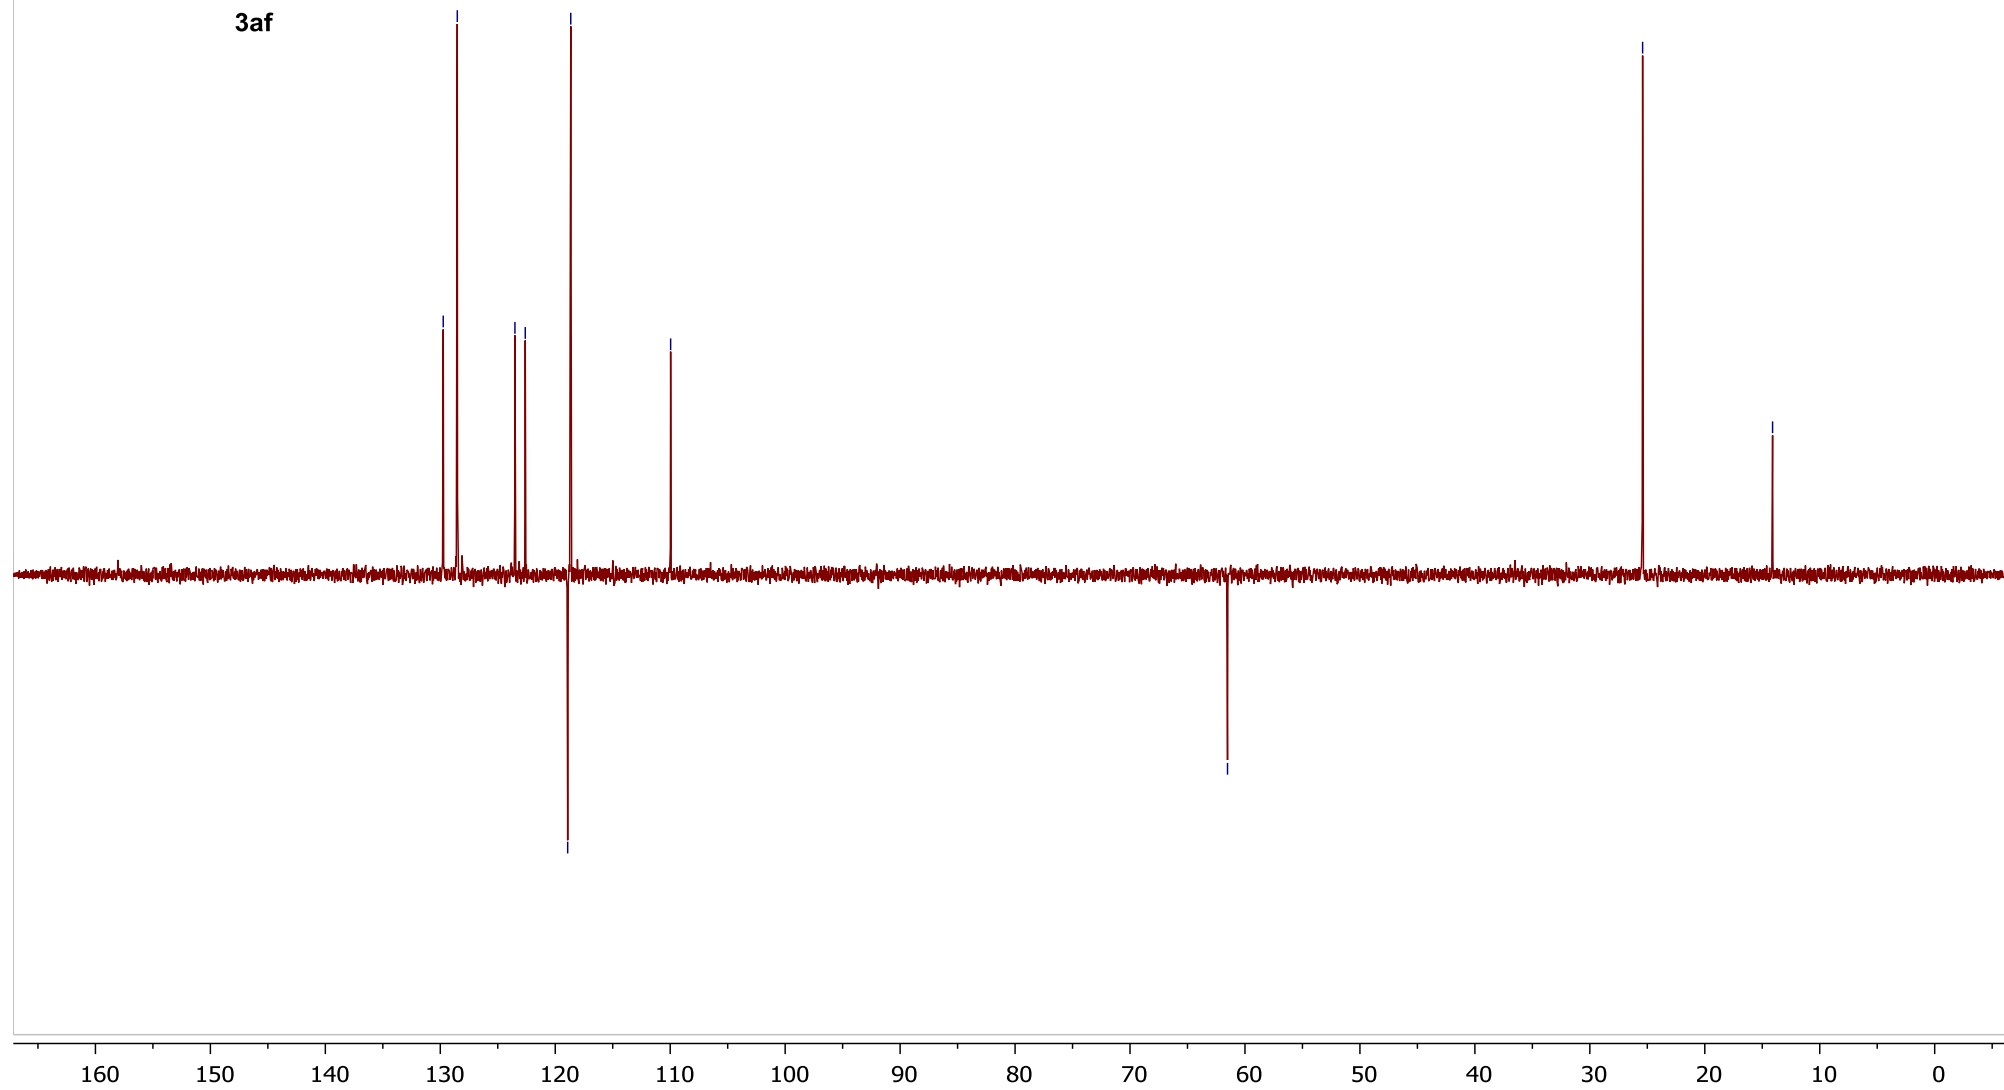



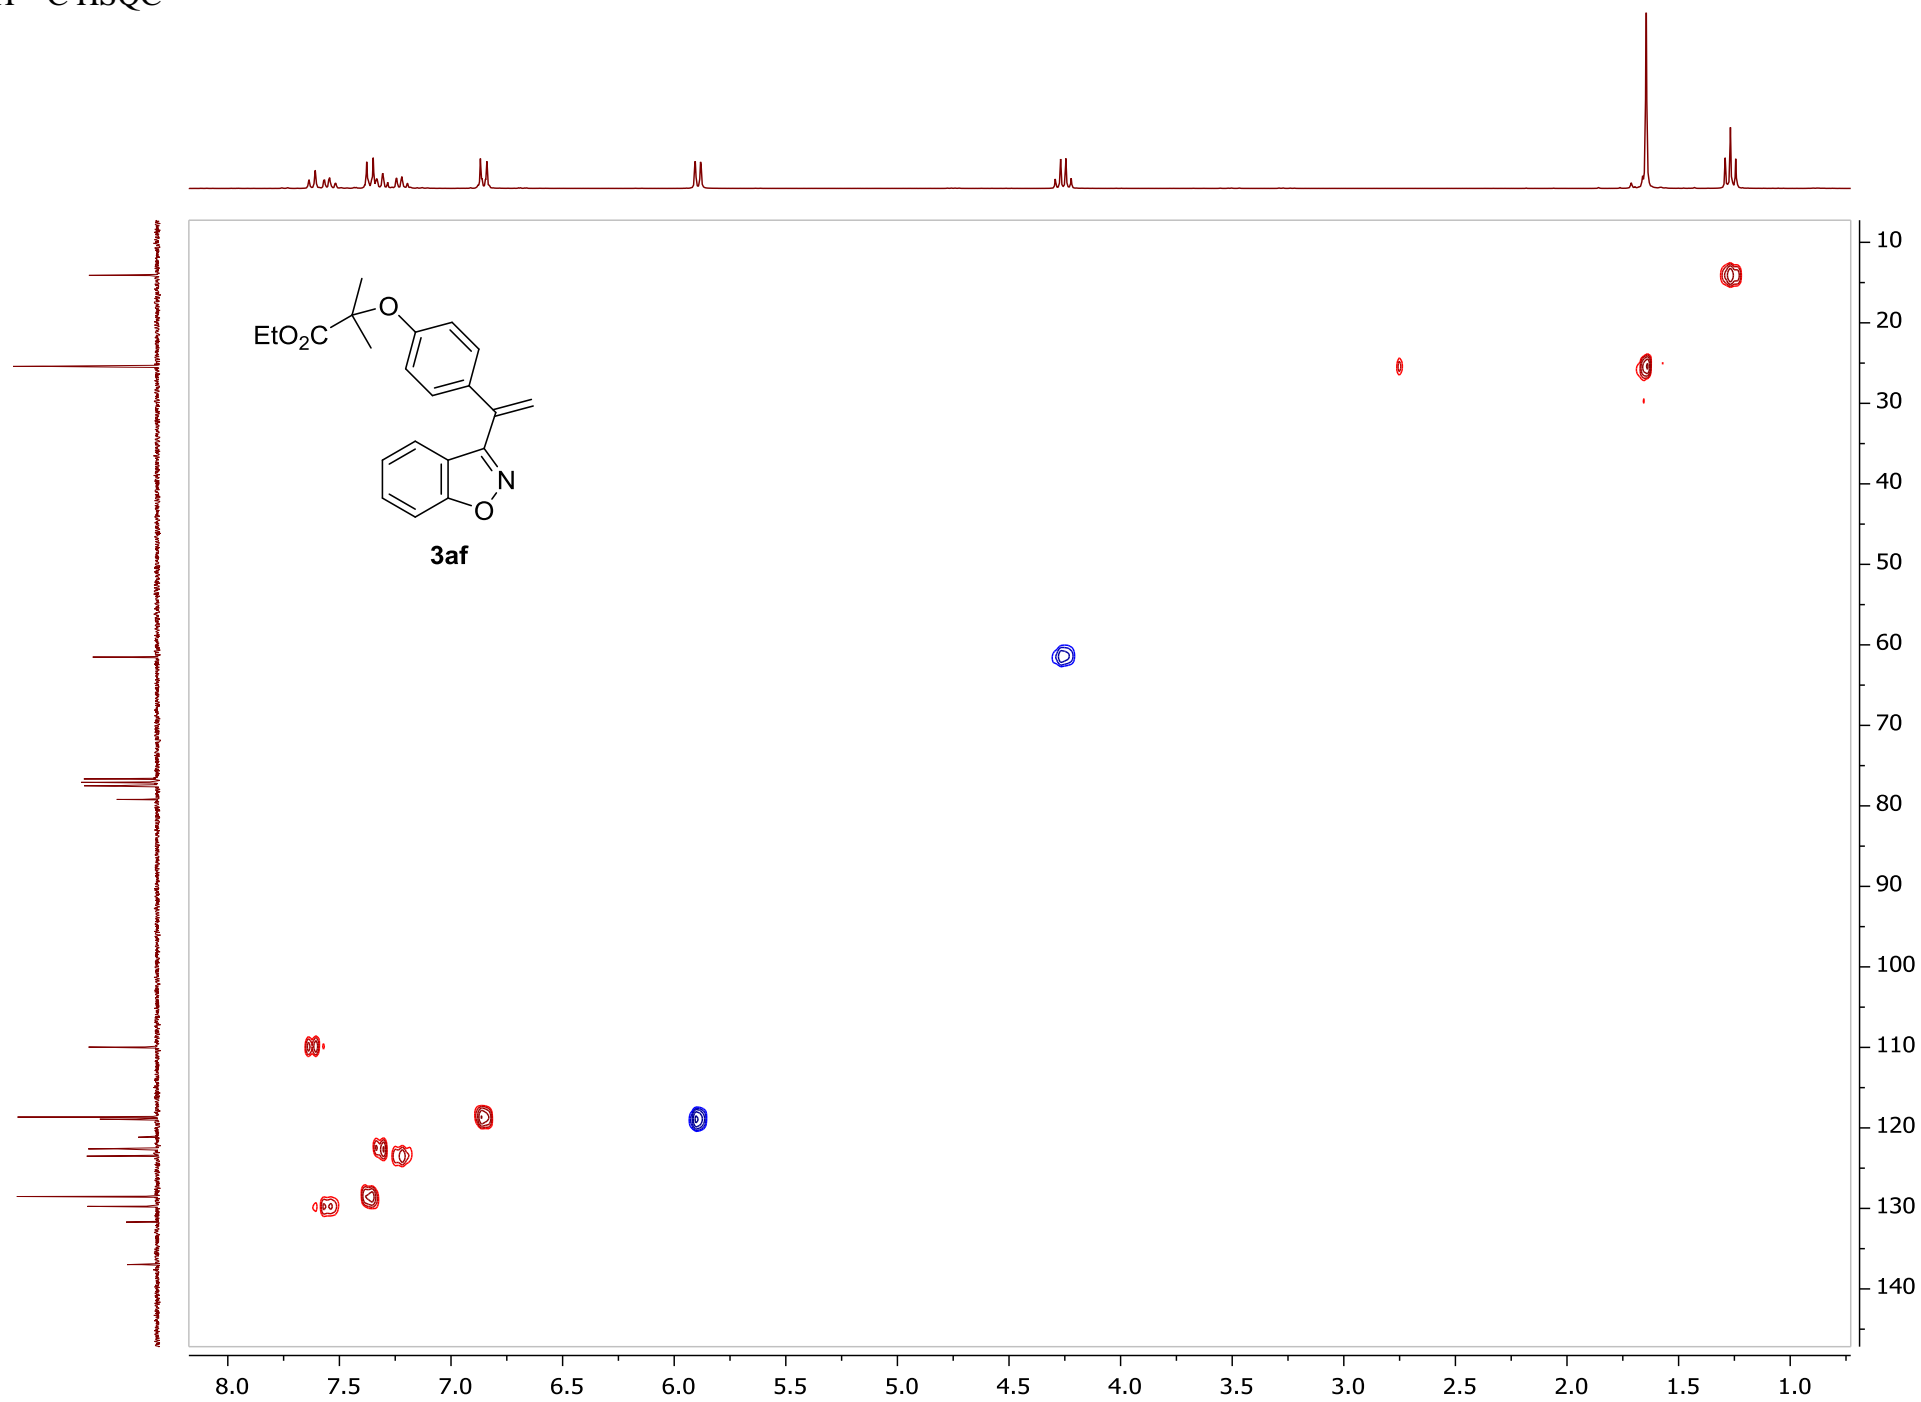

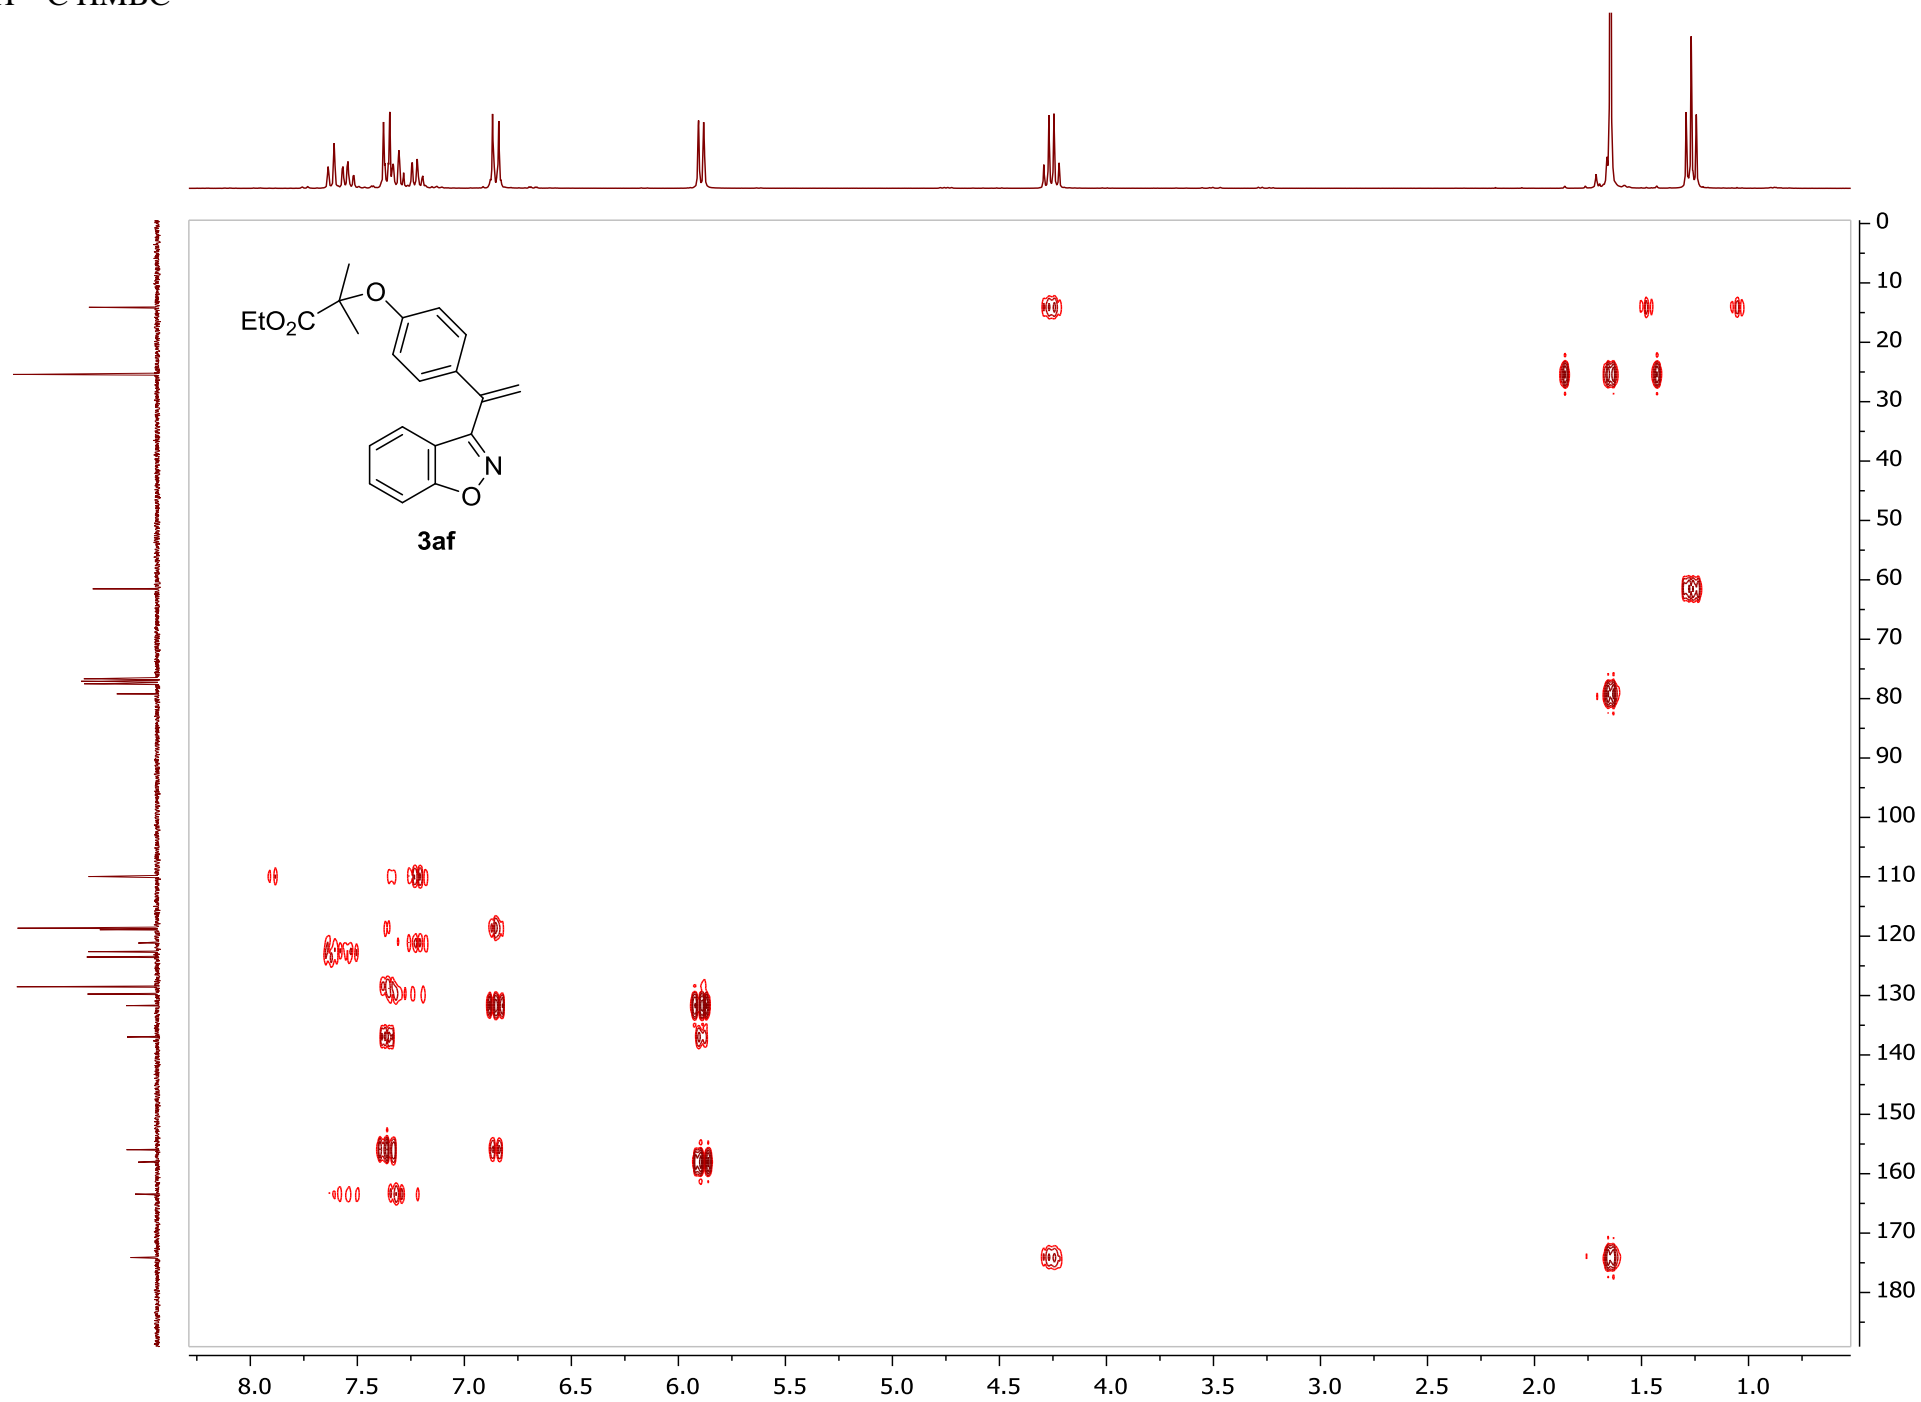

# 3-(1-(3-Methoxyphenyl)vinyl)benzo[d]isoxazole 3ag

<sup>1</sup>H NMR (300 MHz, CDCl<sub>3</sub>)

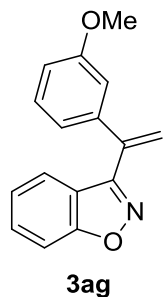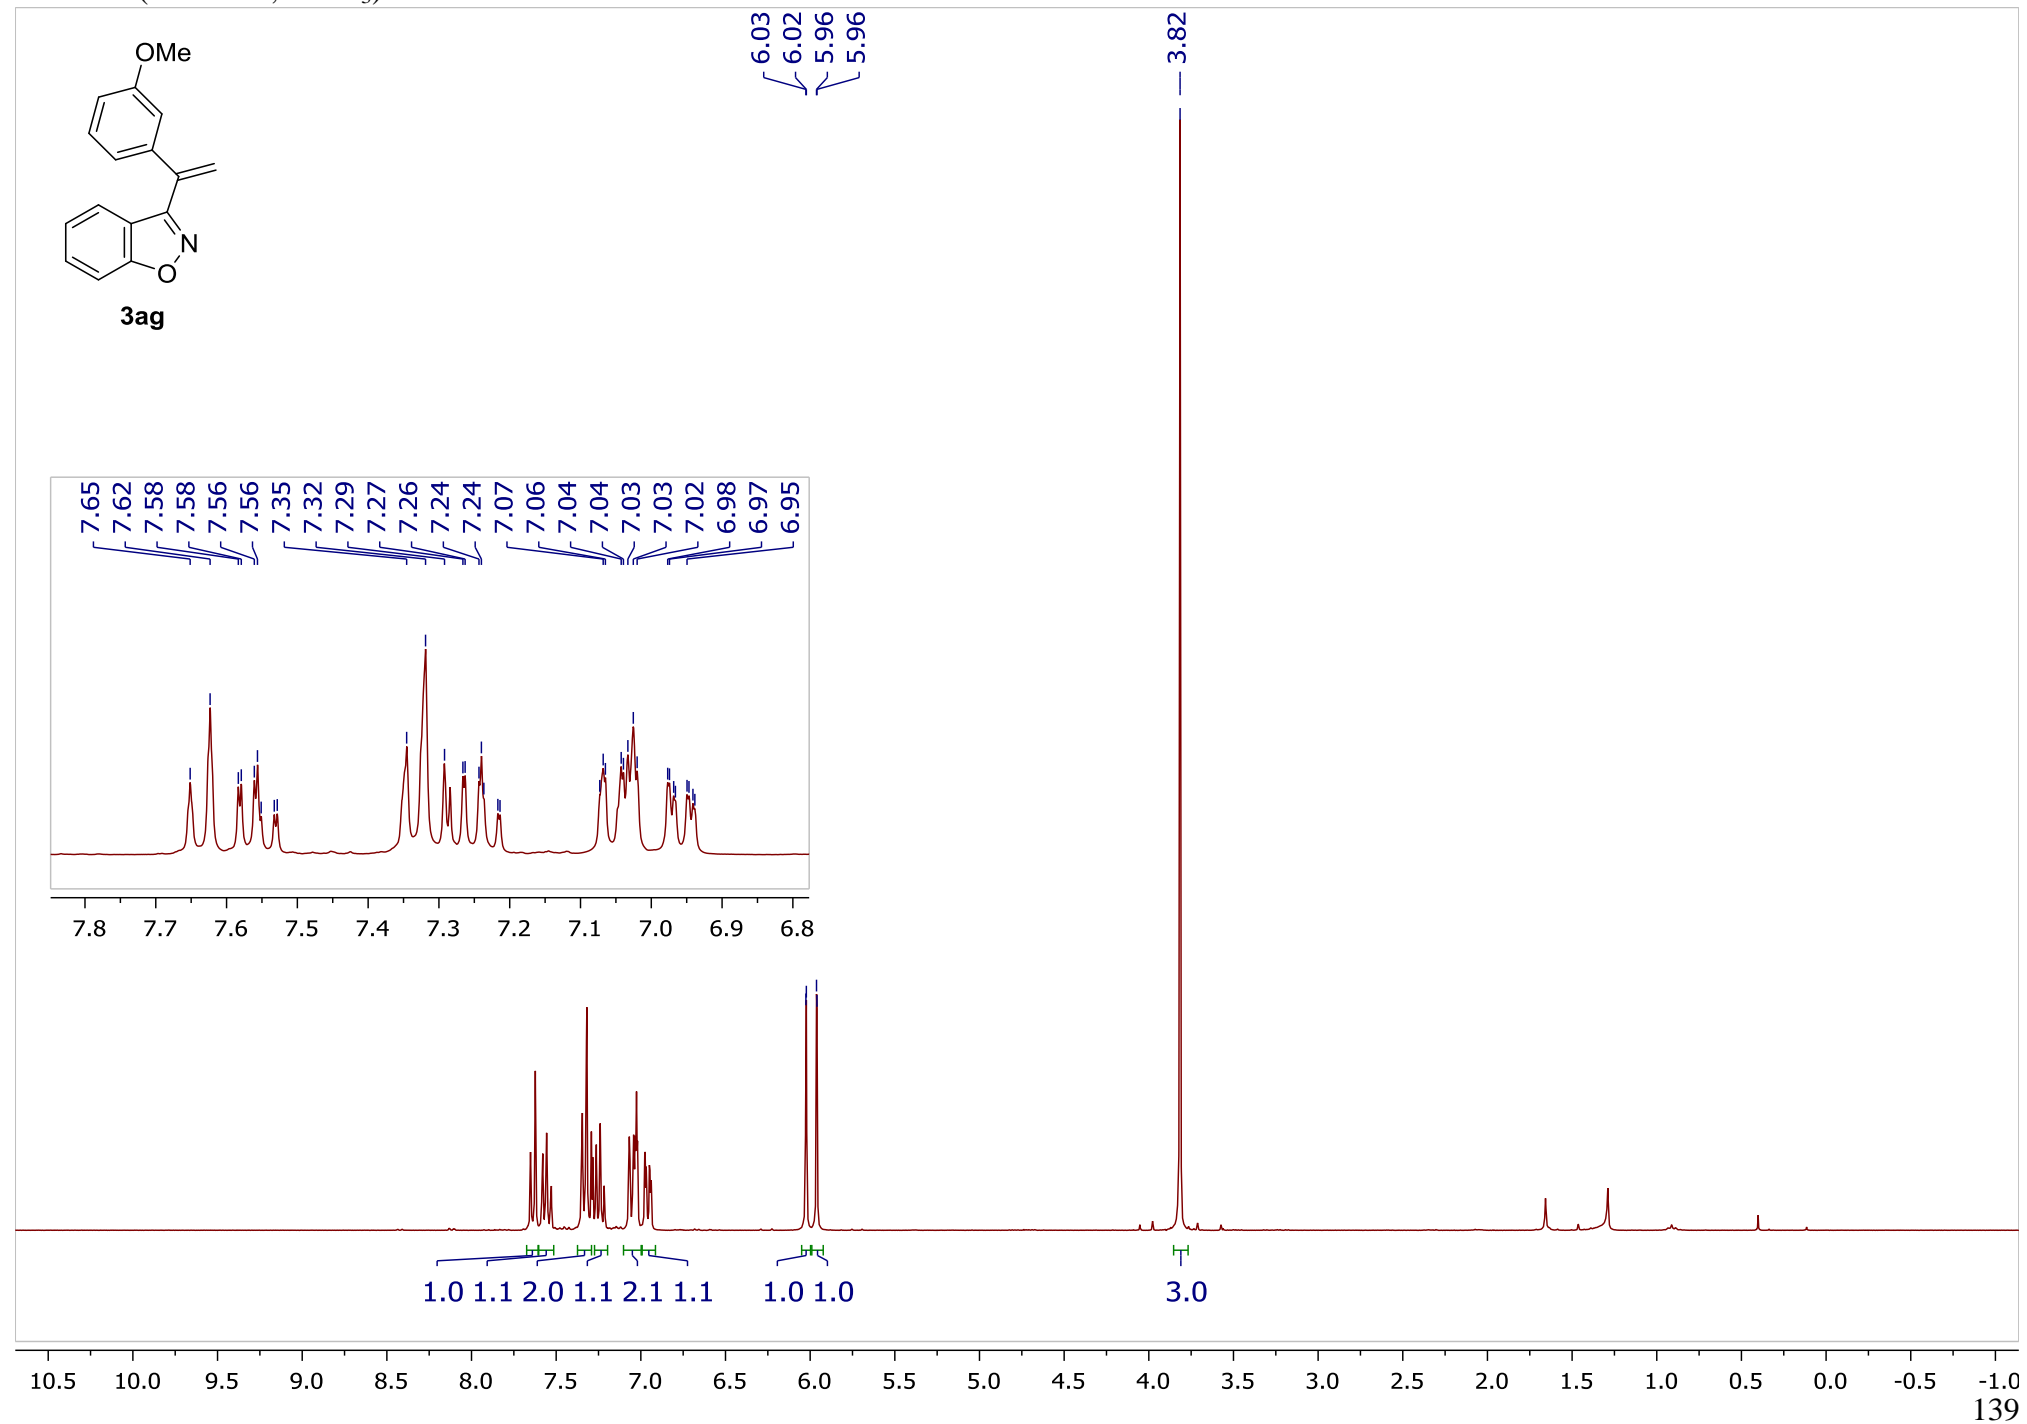

$^{13}\text{C}\{^1\text{H}\}$  NMR (75 MHz,  $\text{CDCl}_3$ )

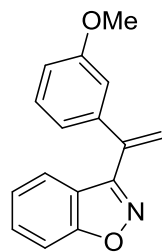

**3ag**

~ 163.47  
~ 159.68  
~ 157.88

~ 139.54  
~ 137.69  
~ 129.76  
~ 129.56  
~ 123.59  
~ 122.61  
~ 121.07  
~ 120.37  
~ 120.21  
~ 114.18  
~ 113.30  
~ 109.98

— 55.32

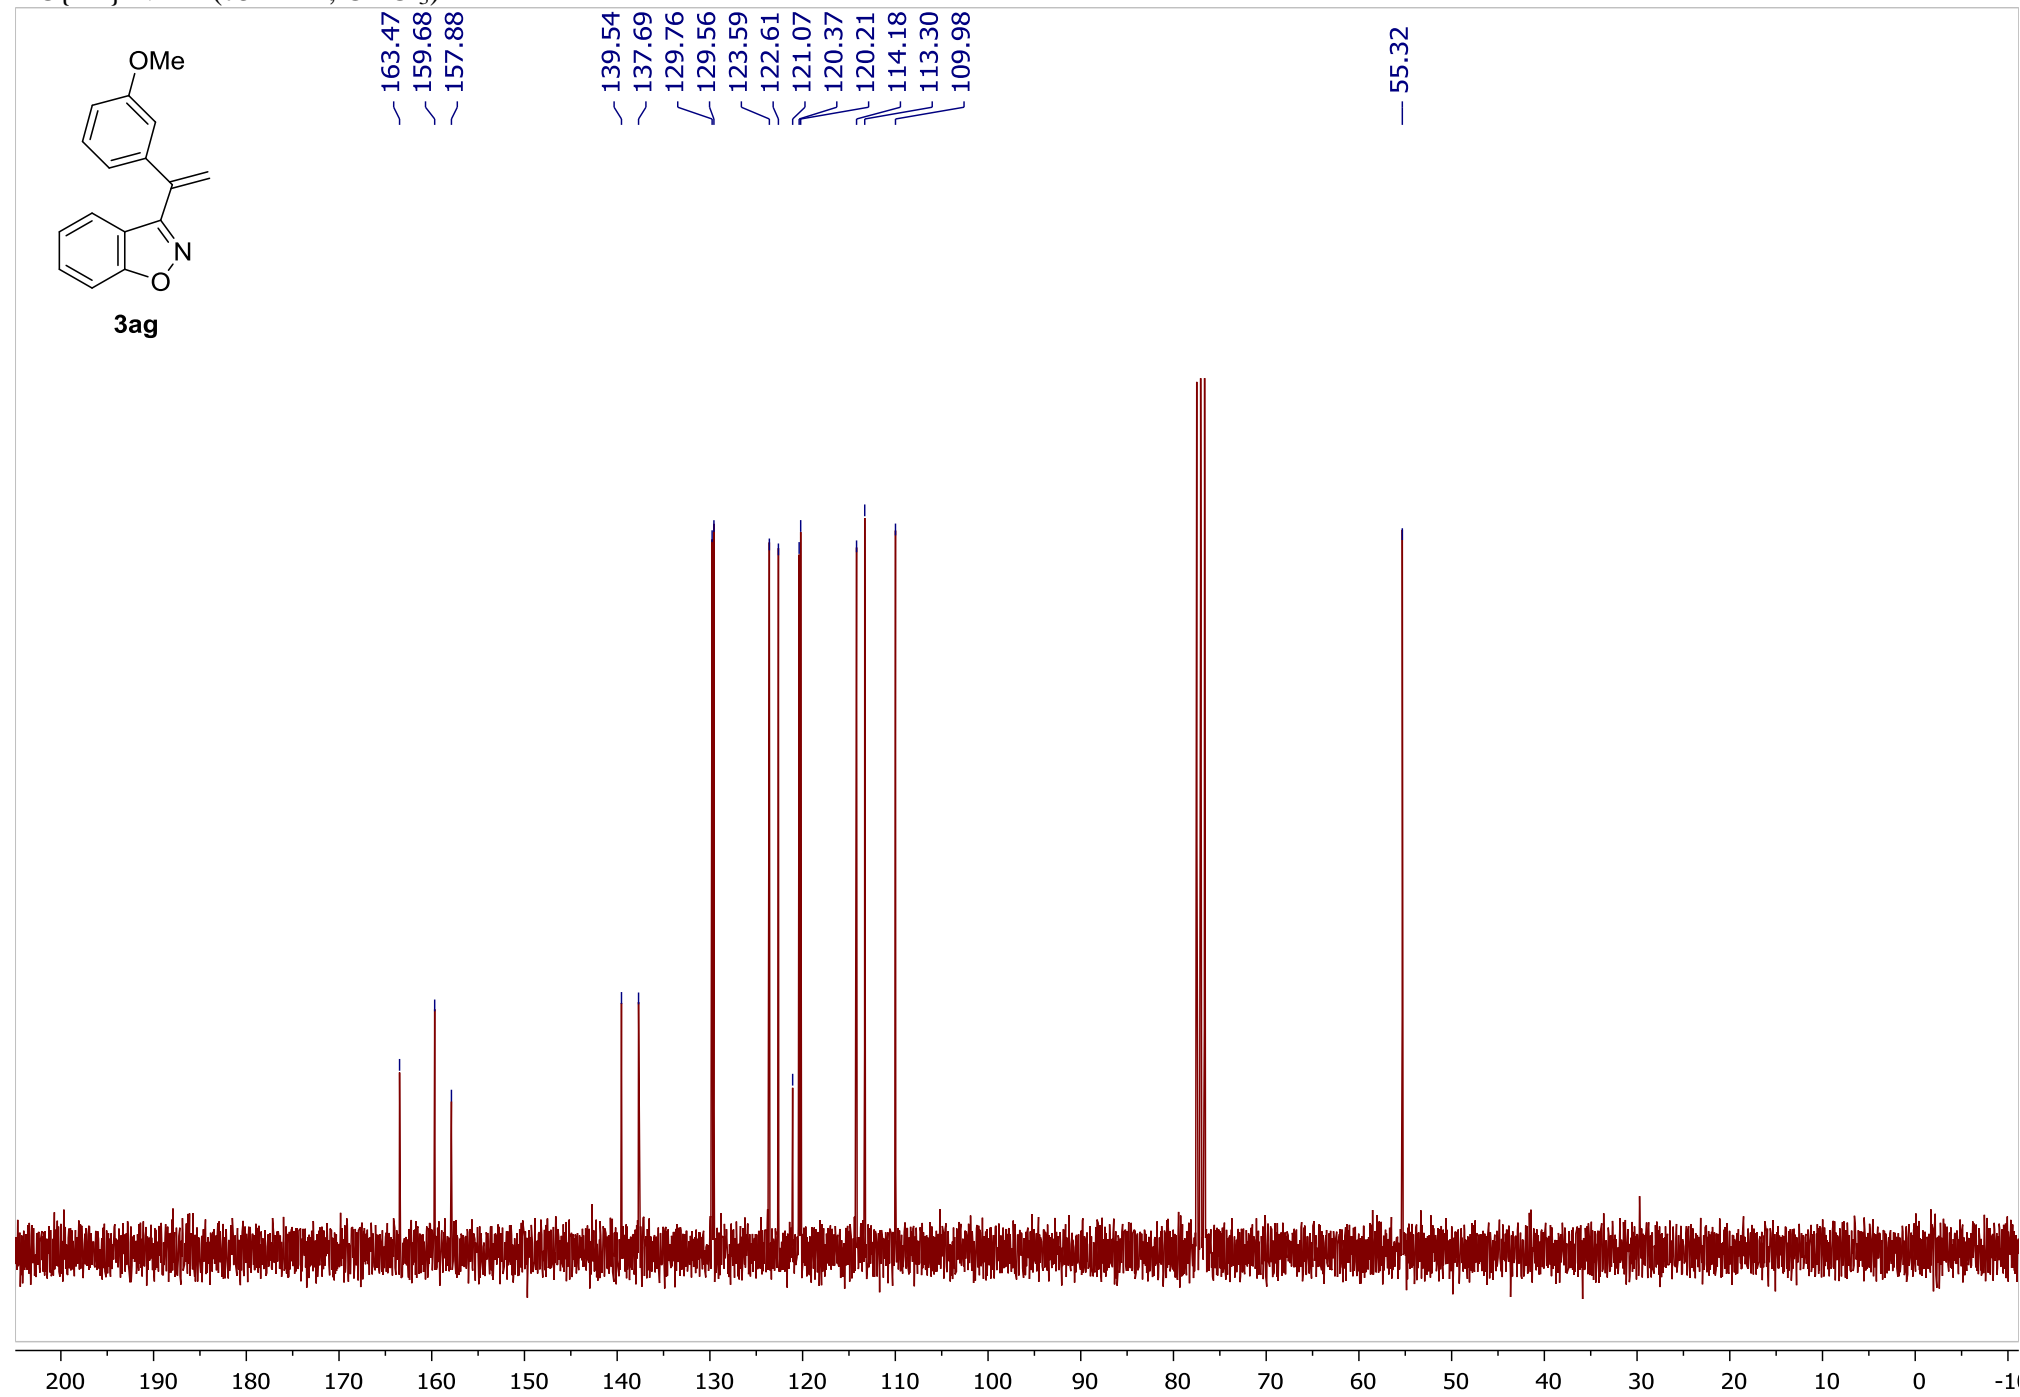

$^{13}\text{C}$  DEPT 135 (75 MHz,  $\text{CDCl}_3$ )

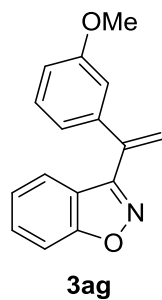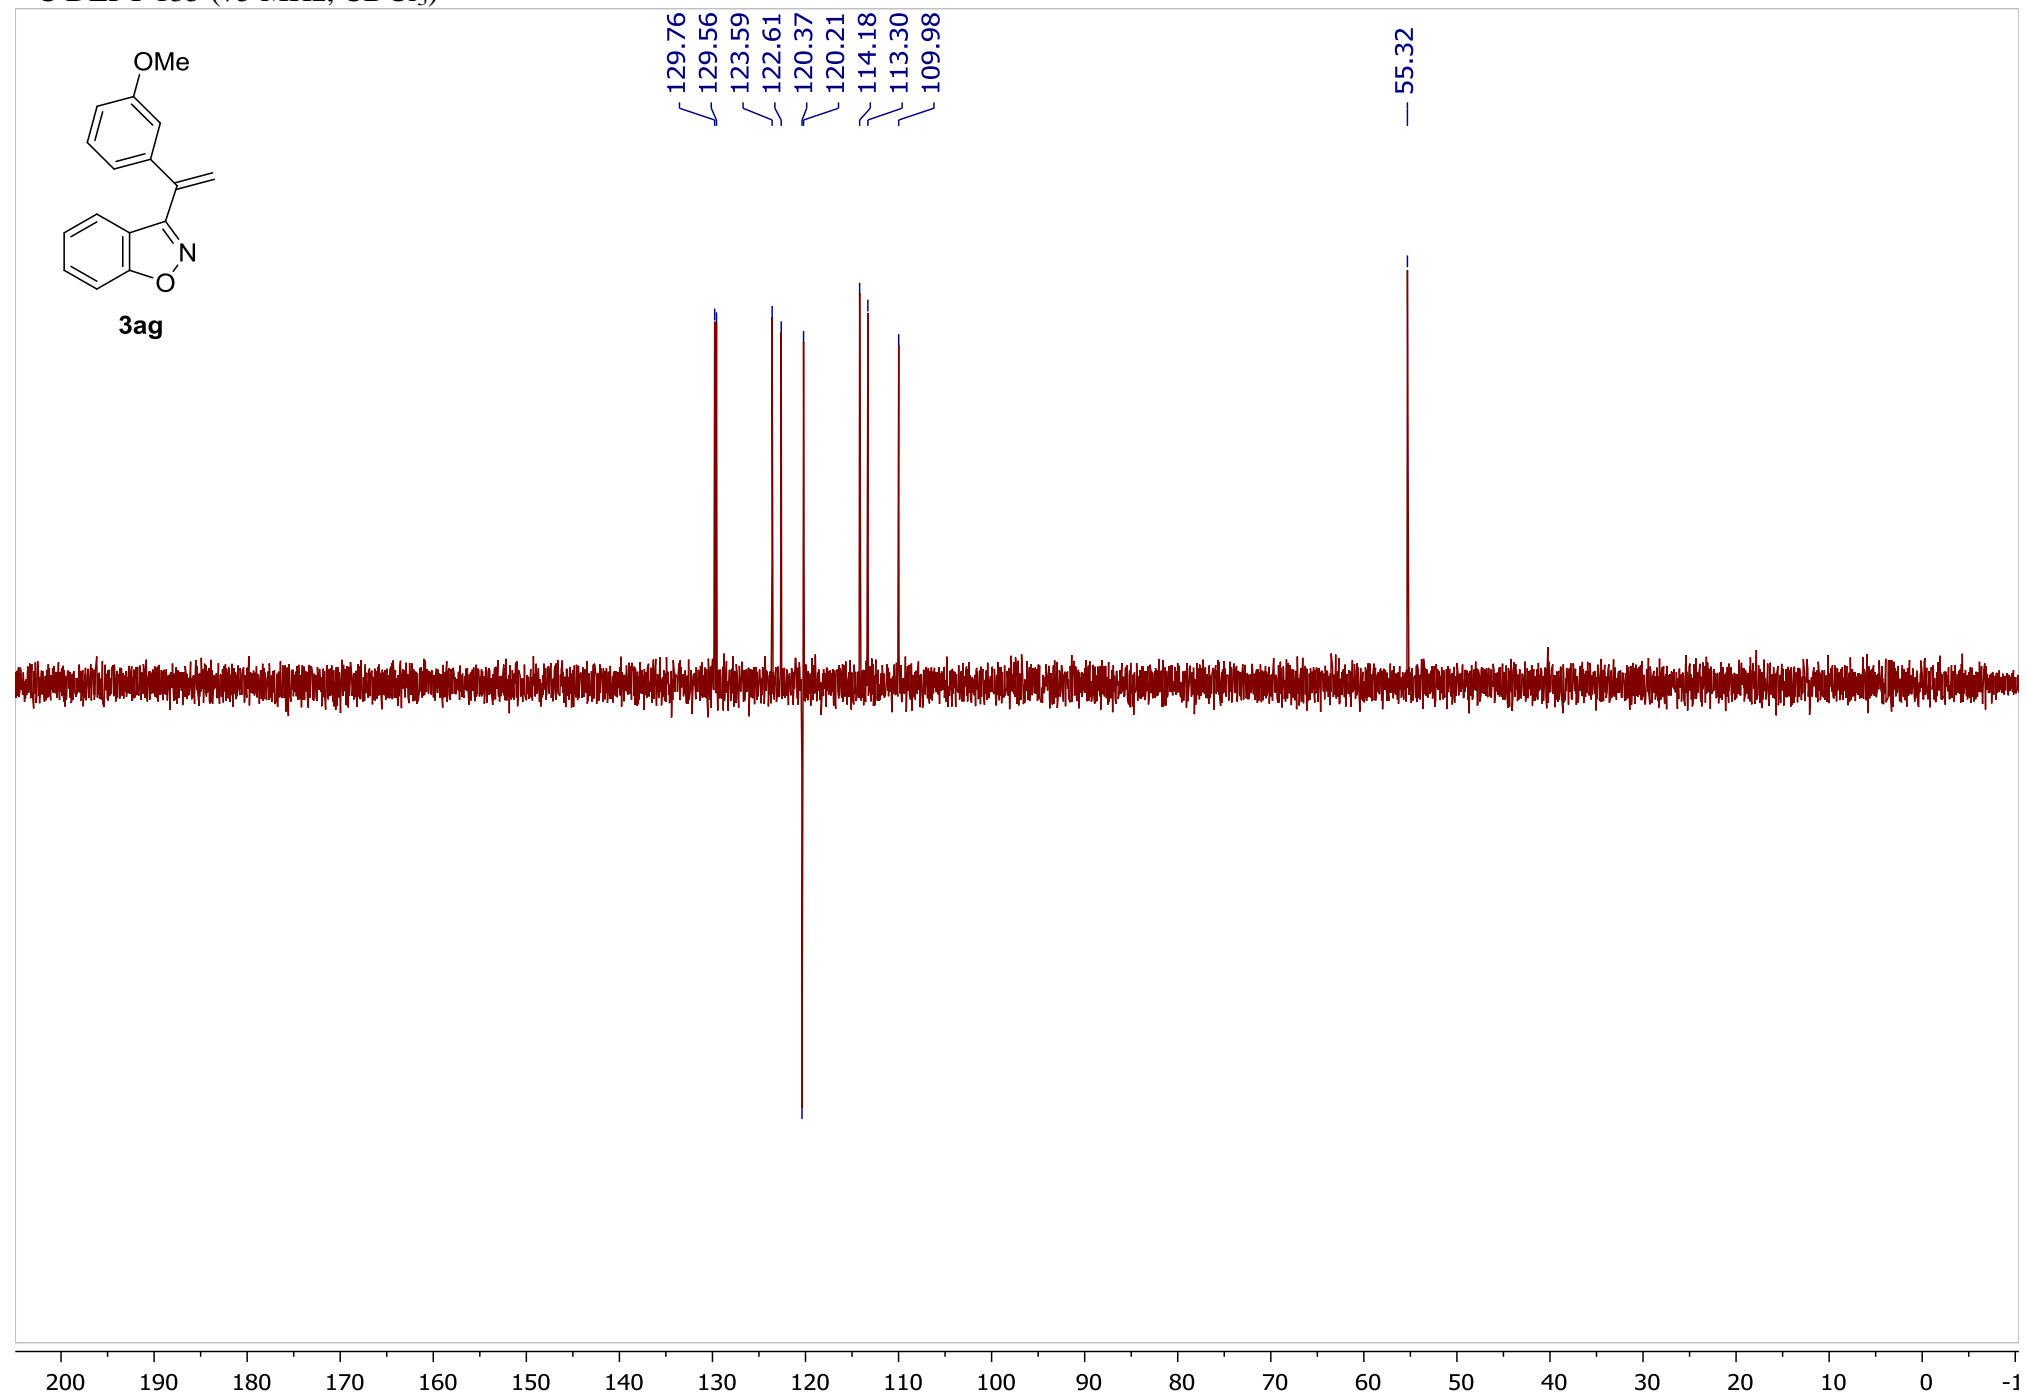

**3-(1-(2-Methoxyphenyl)vinyl)benzo[d]isoxazole 3ah**

<sup>1</sup>H NMR (300 MHz, CDCl<sub>3</sub>)

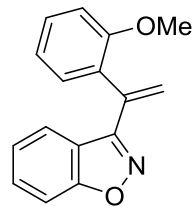

**3ah**

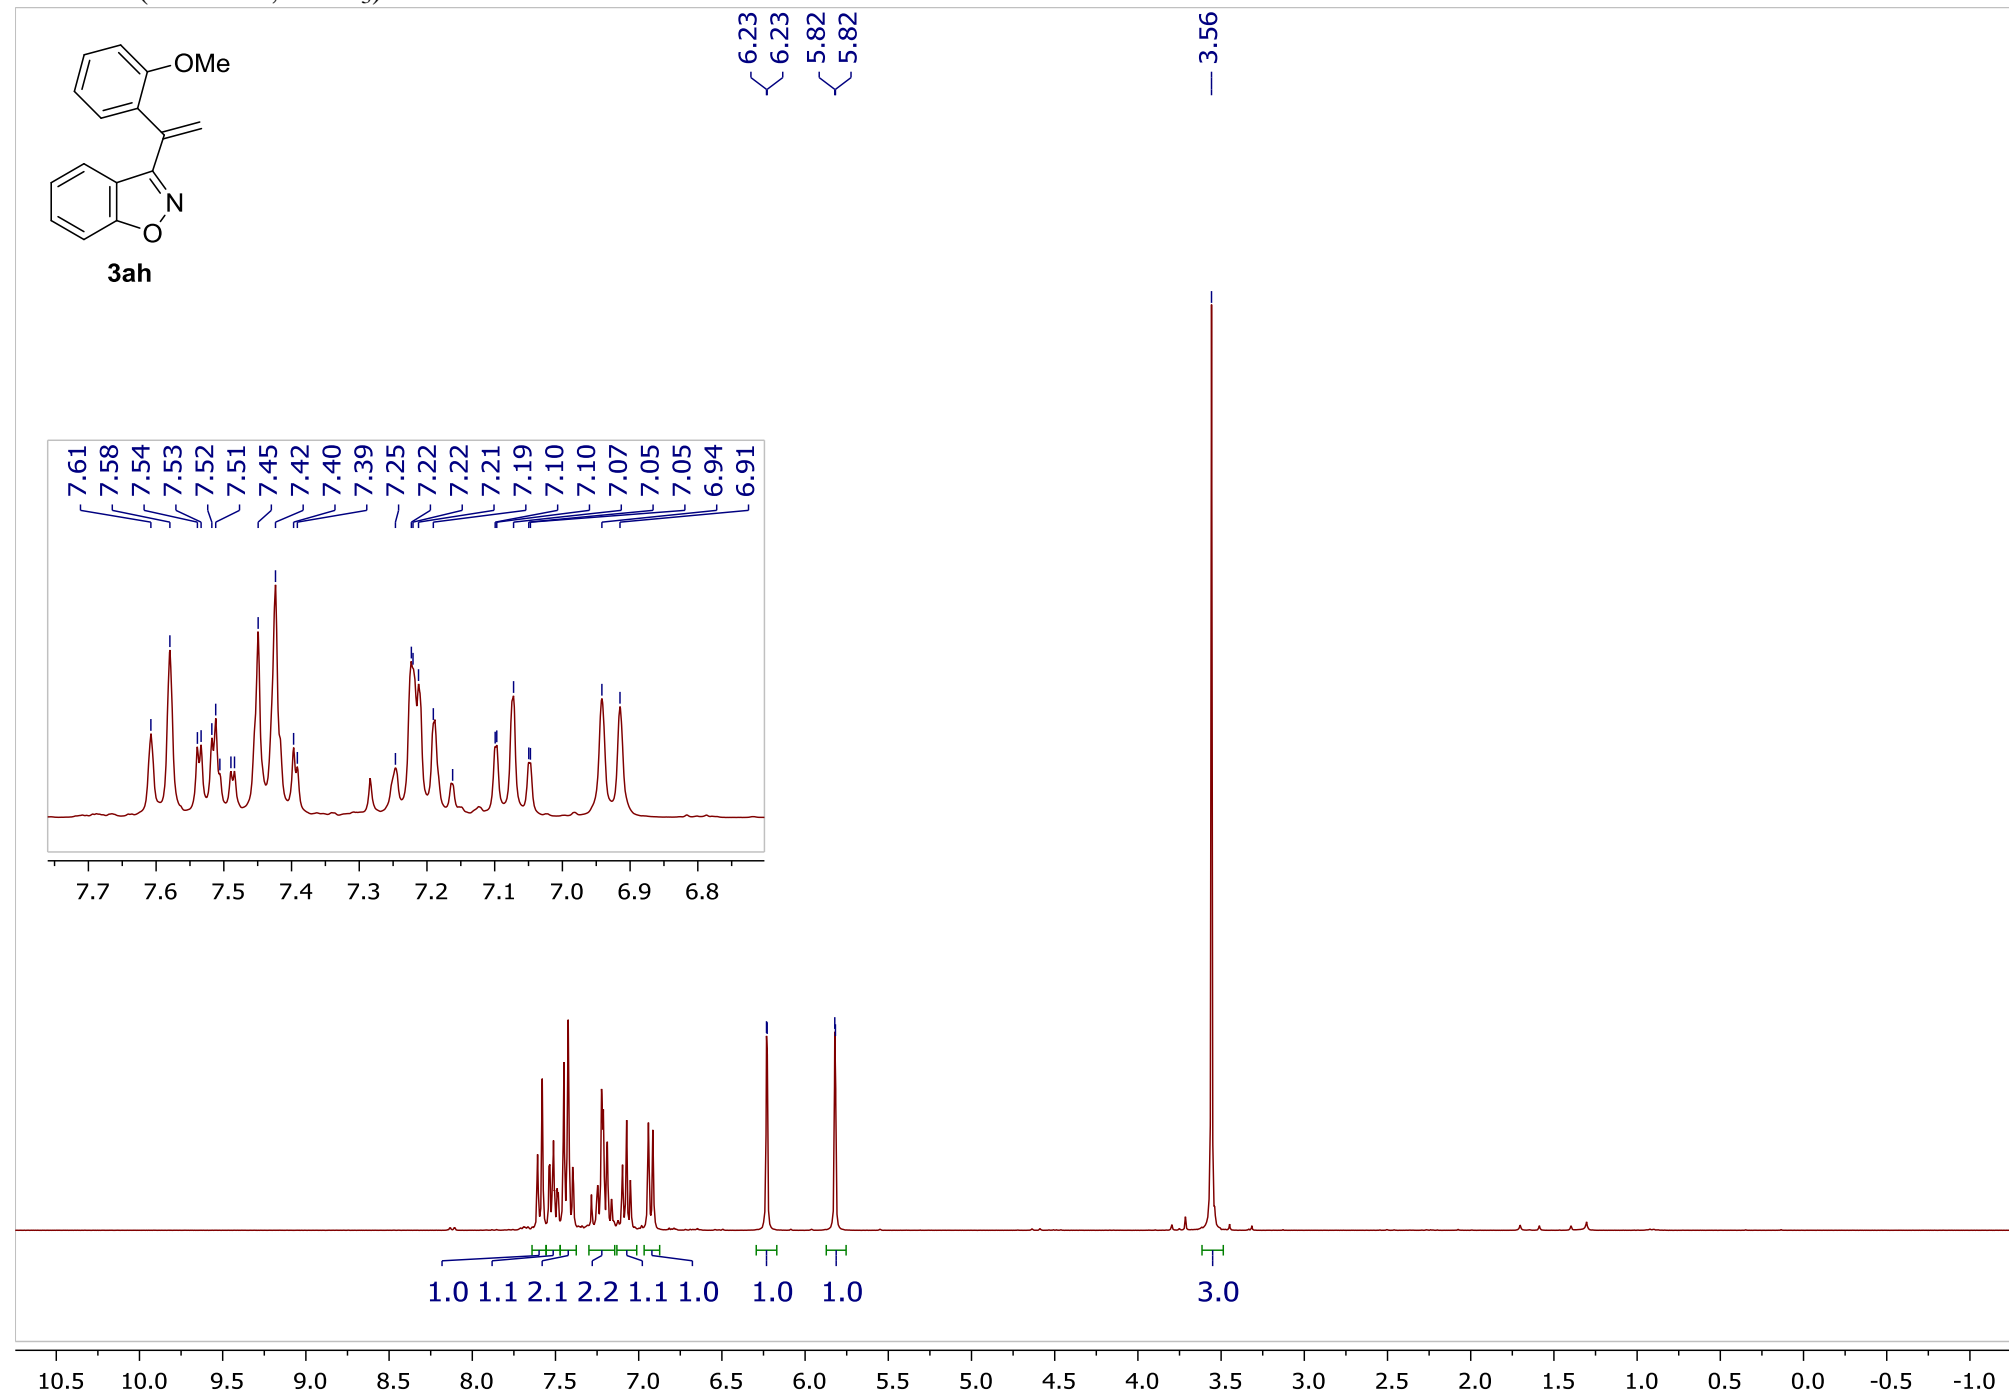

$^{13}\text{C}\{^1\text{H}\}$  NMR (75 MHz,  $\text{CDCl}_3$ )

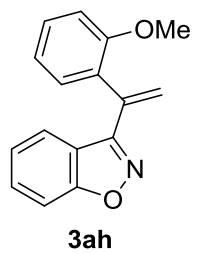

163.31  
158.07  
157.17  
135.93  
130.62  
130.14  
129.33  
128.33  
123.31  
122.14  
121.72  
120.97  
120.91  
111.29  
109.84  
55.50

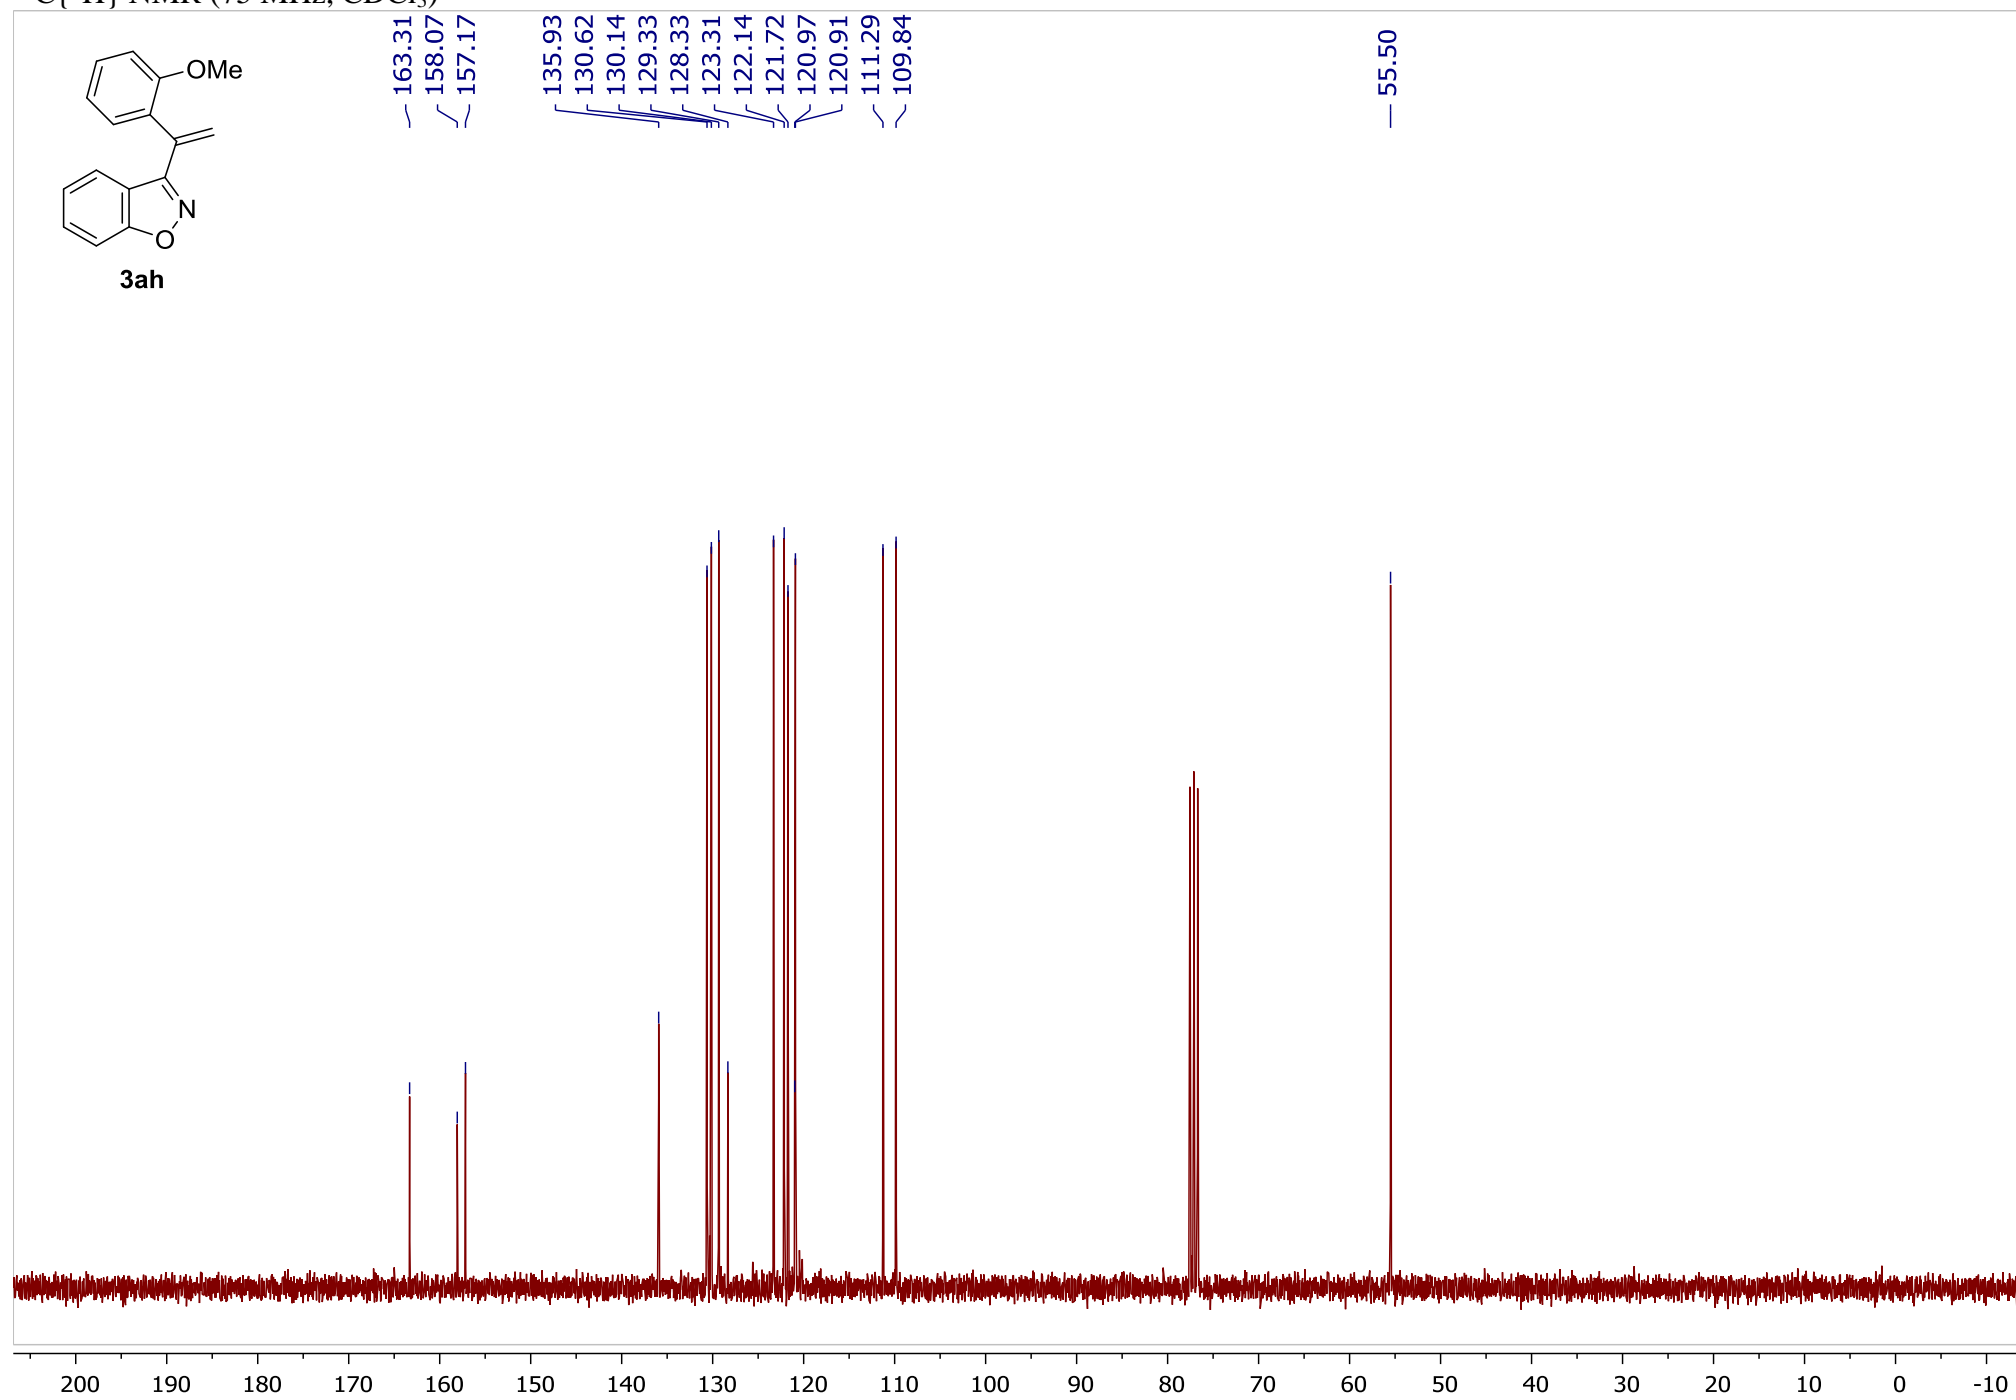

$^{13}\text{C}$  DEPT 135 (75 MHz,  $\text{CDCl}_3$ )

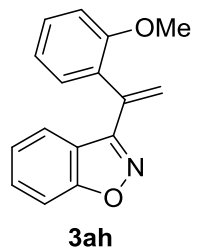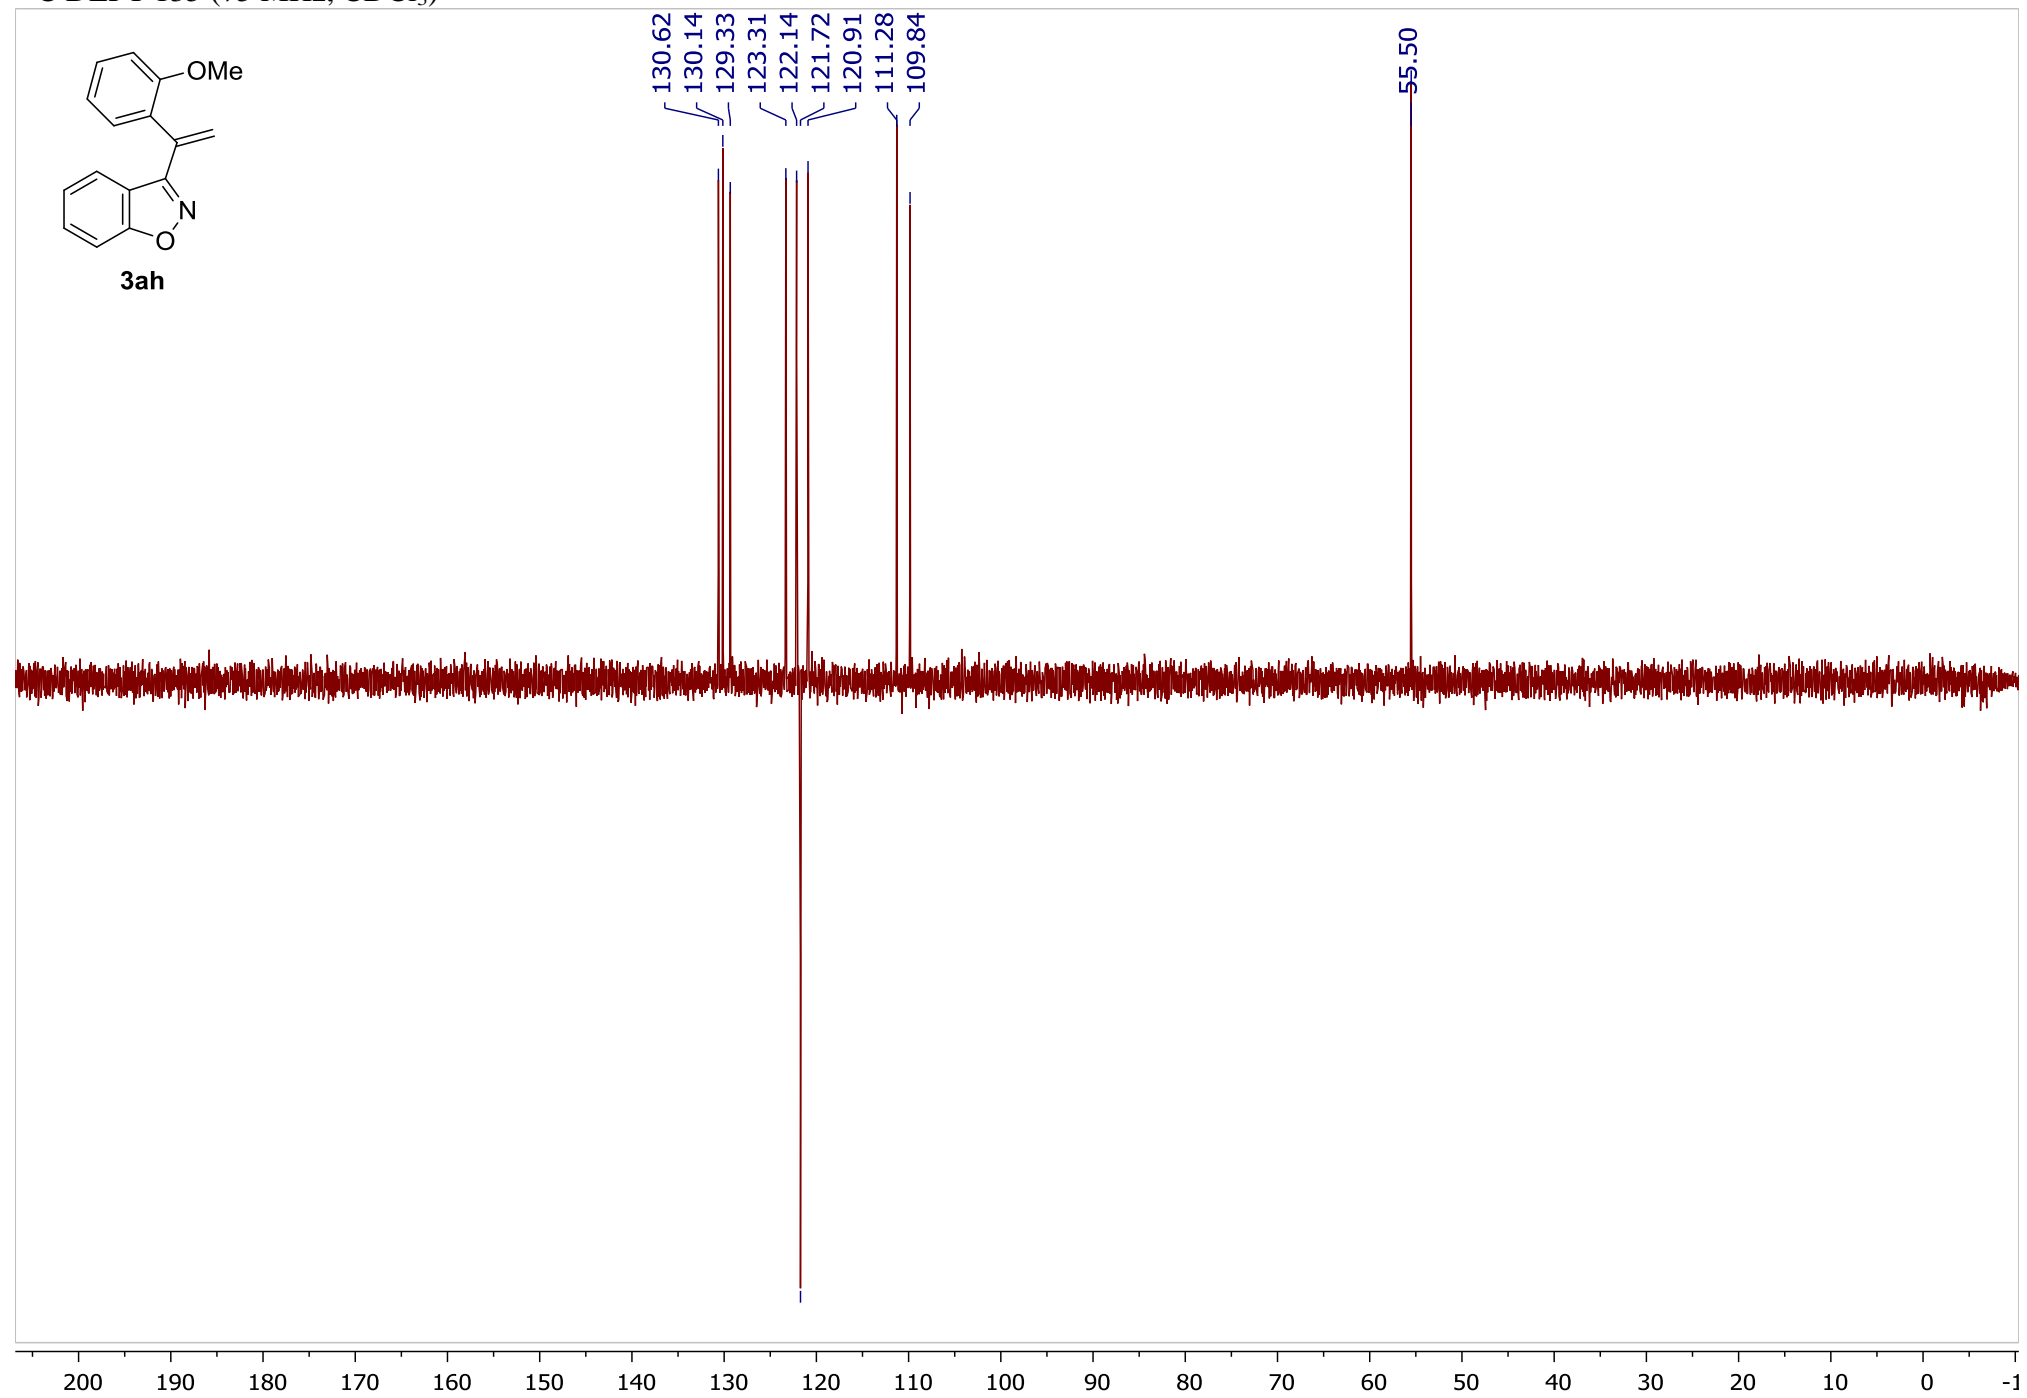



**3-(1-(Naphthalen-1-yl)vinyl)benzo[d]isoxazole 3ai**

<sup>1</sup>H NMR (300 MHz, CDCl<sub>3</sub>)

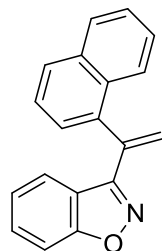

**3ai**

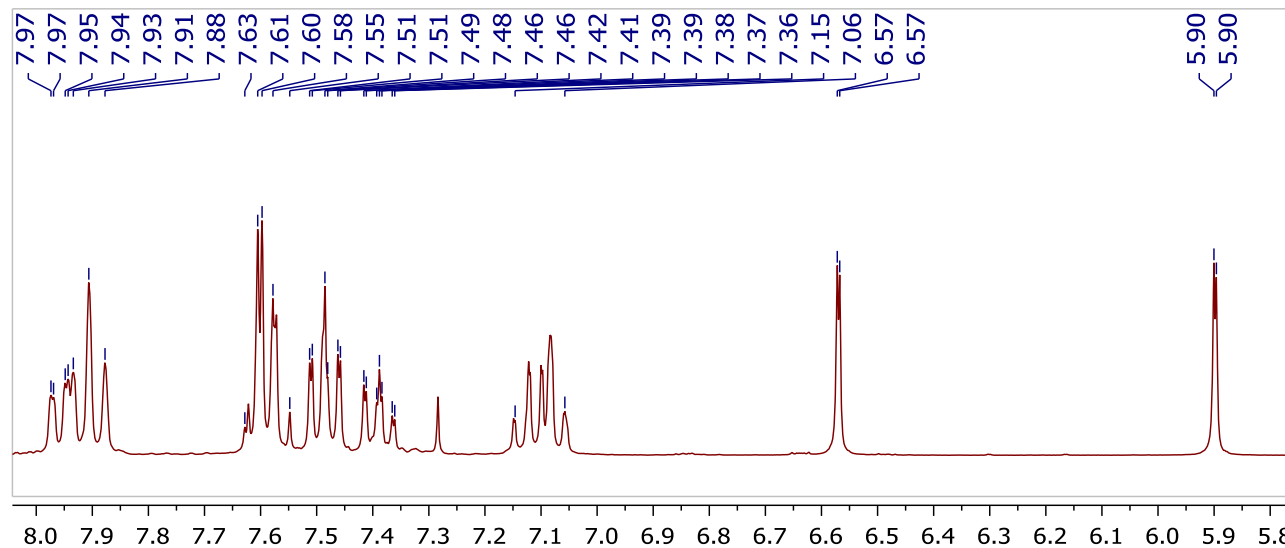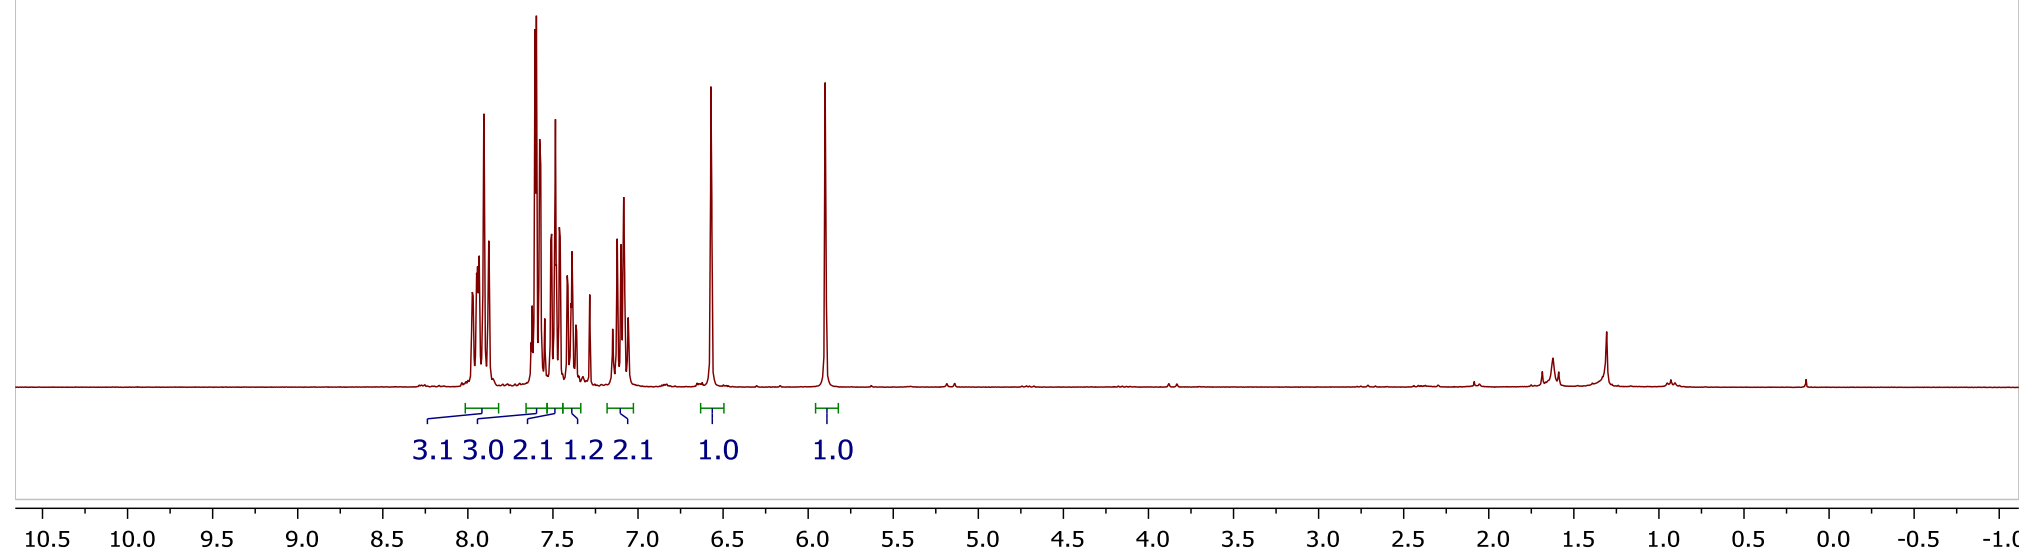

$^{13}\text{C}\{^1\text{H}\}$  NMR (75 MHz,  $\text{CDCl}_3$ )

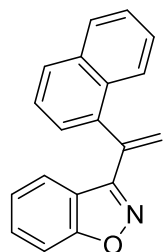

**3ai**

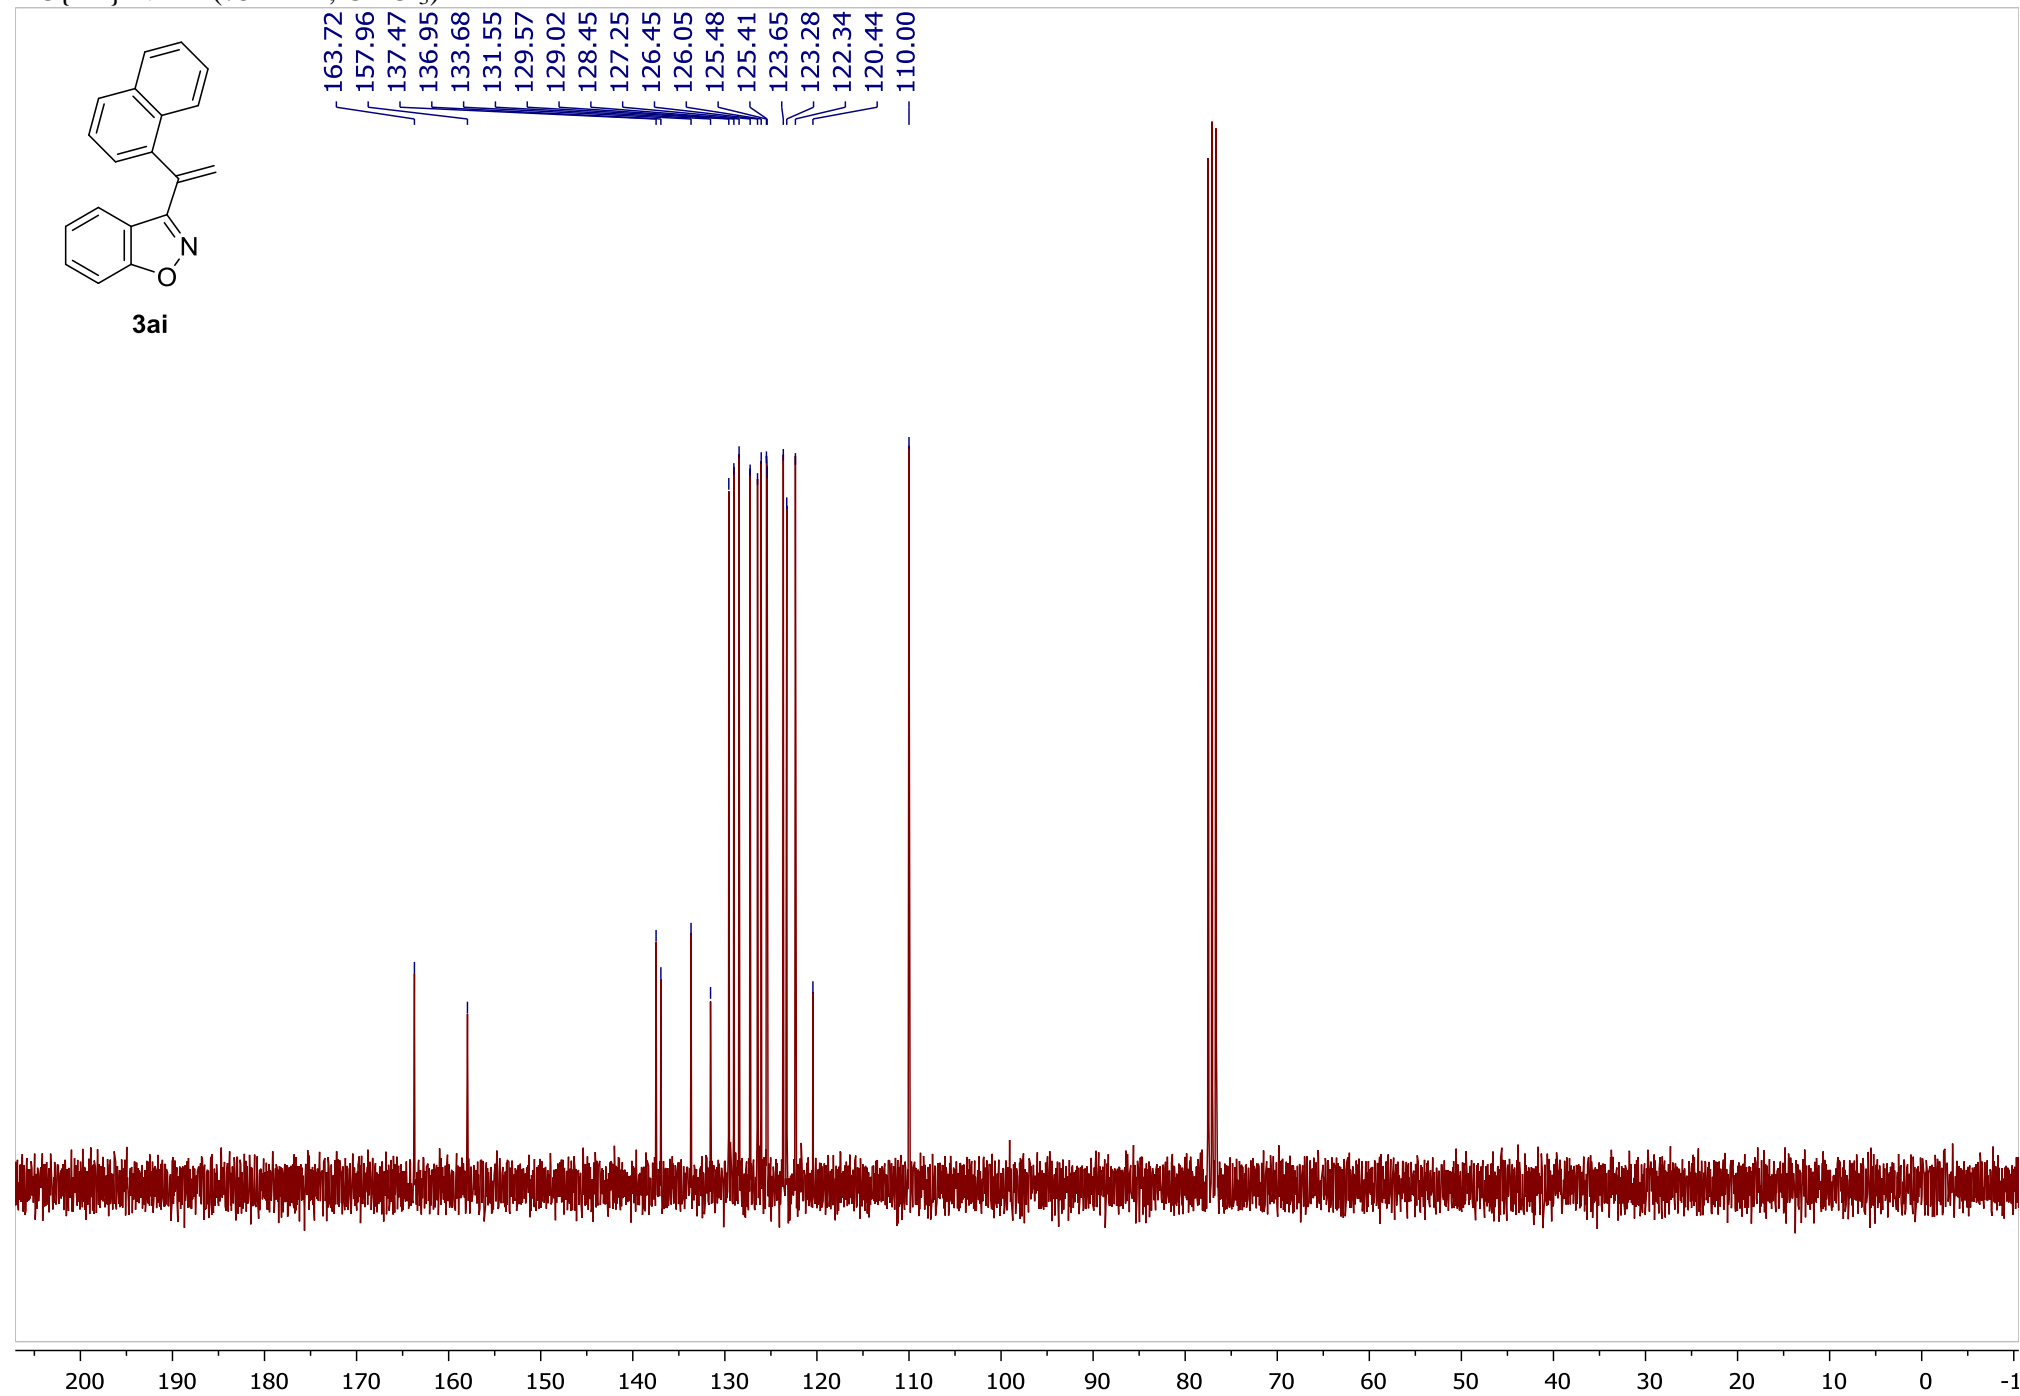

$^{13}\text{C}$  DEPT 135 (75 MHz,  $\text{CDCl}_3$ )

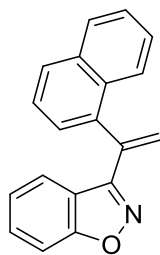

**3ai**

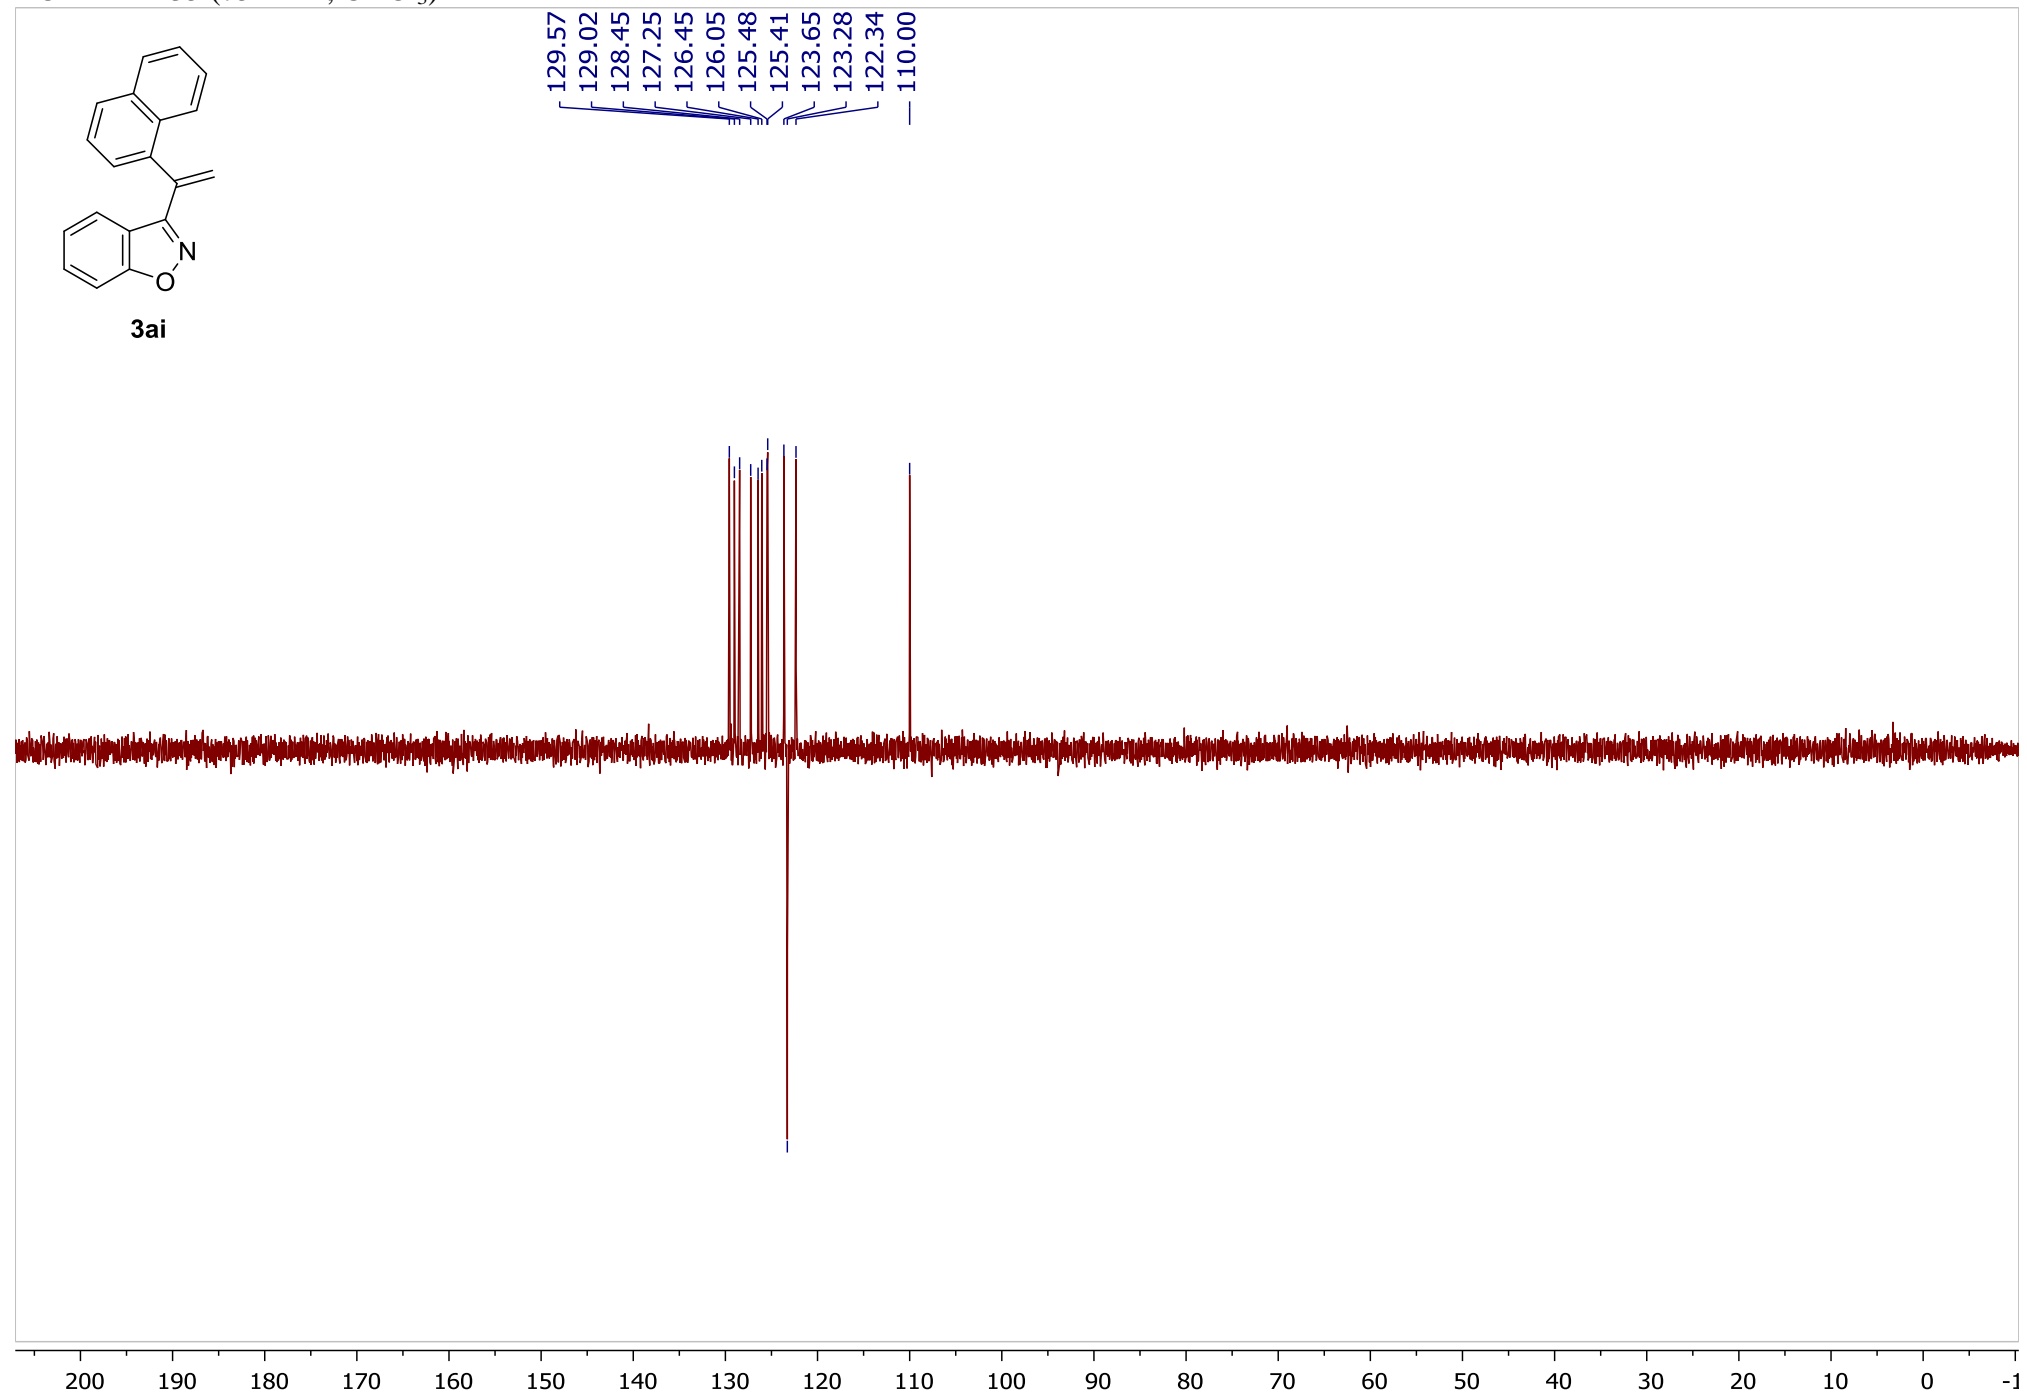

**3-(1-(Benzo[d][1,3]dioxol-5-yl)vinyl)benzo[d]isoxazole 3aj**

<sup>1</sup>H NMR (300 MHz, CDCl<sub>3</sub>)

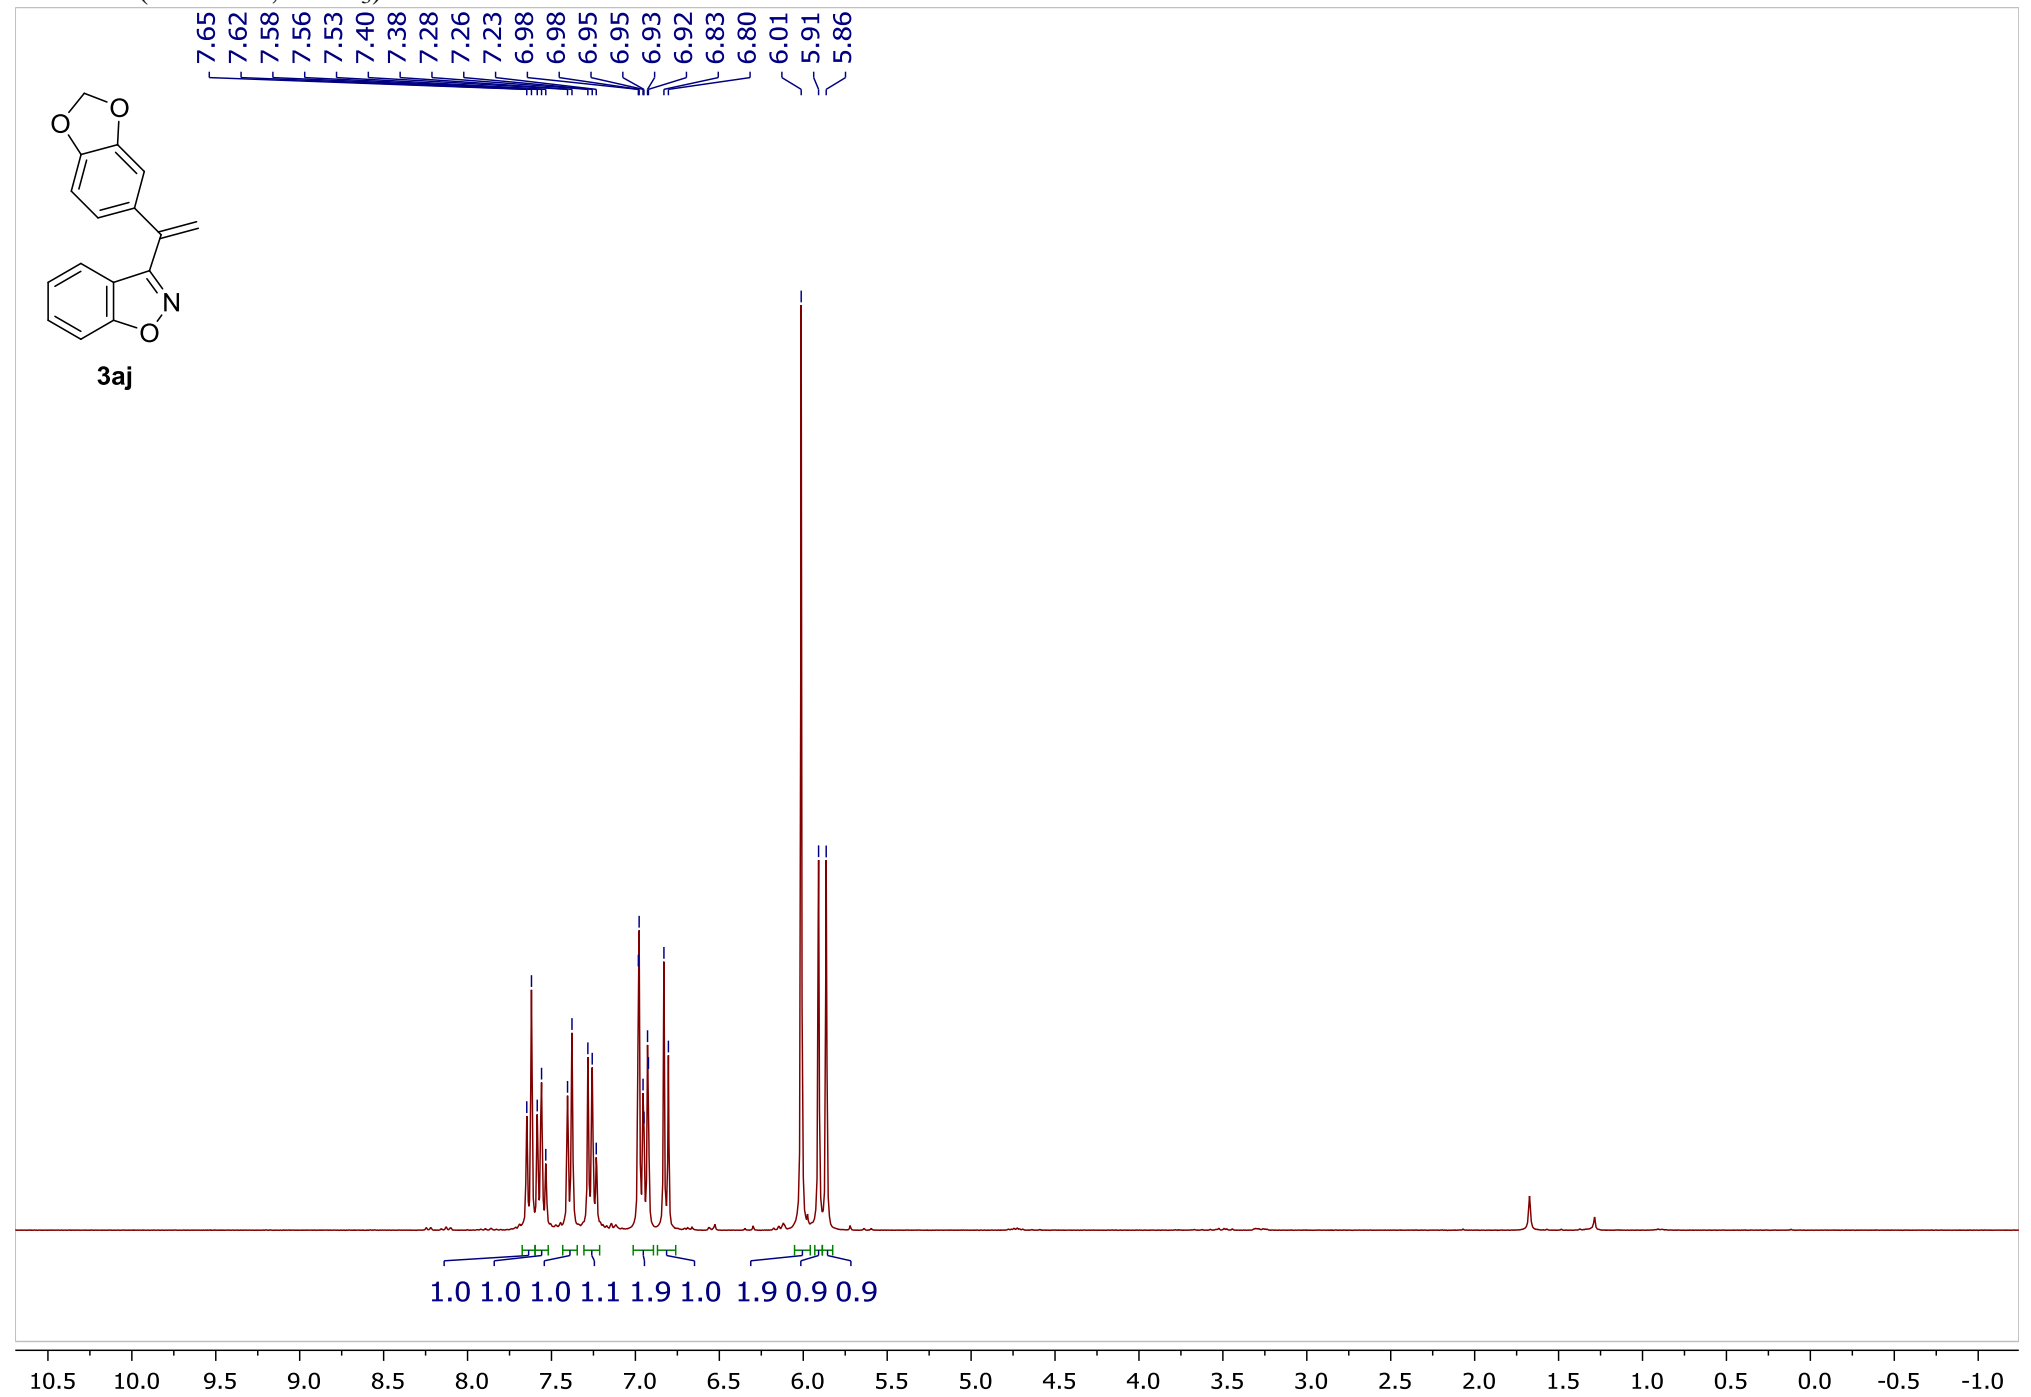

$^{13}\text{C}\{^1\text{H}\}$  NMR (75 MHz,  $\text{CDCl}_3$ )

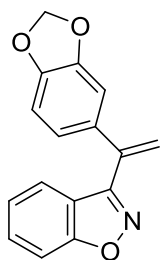

**3aj**

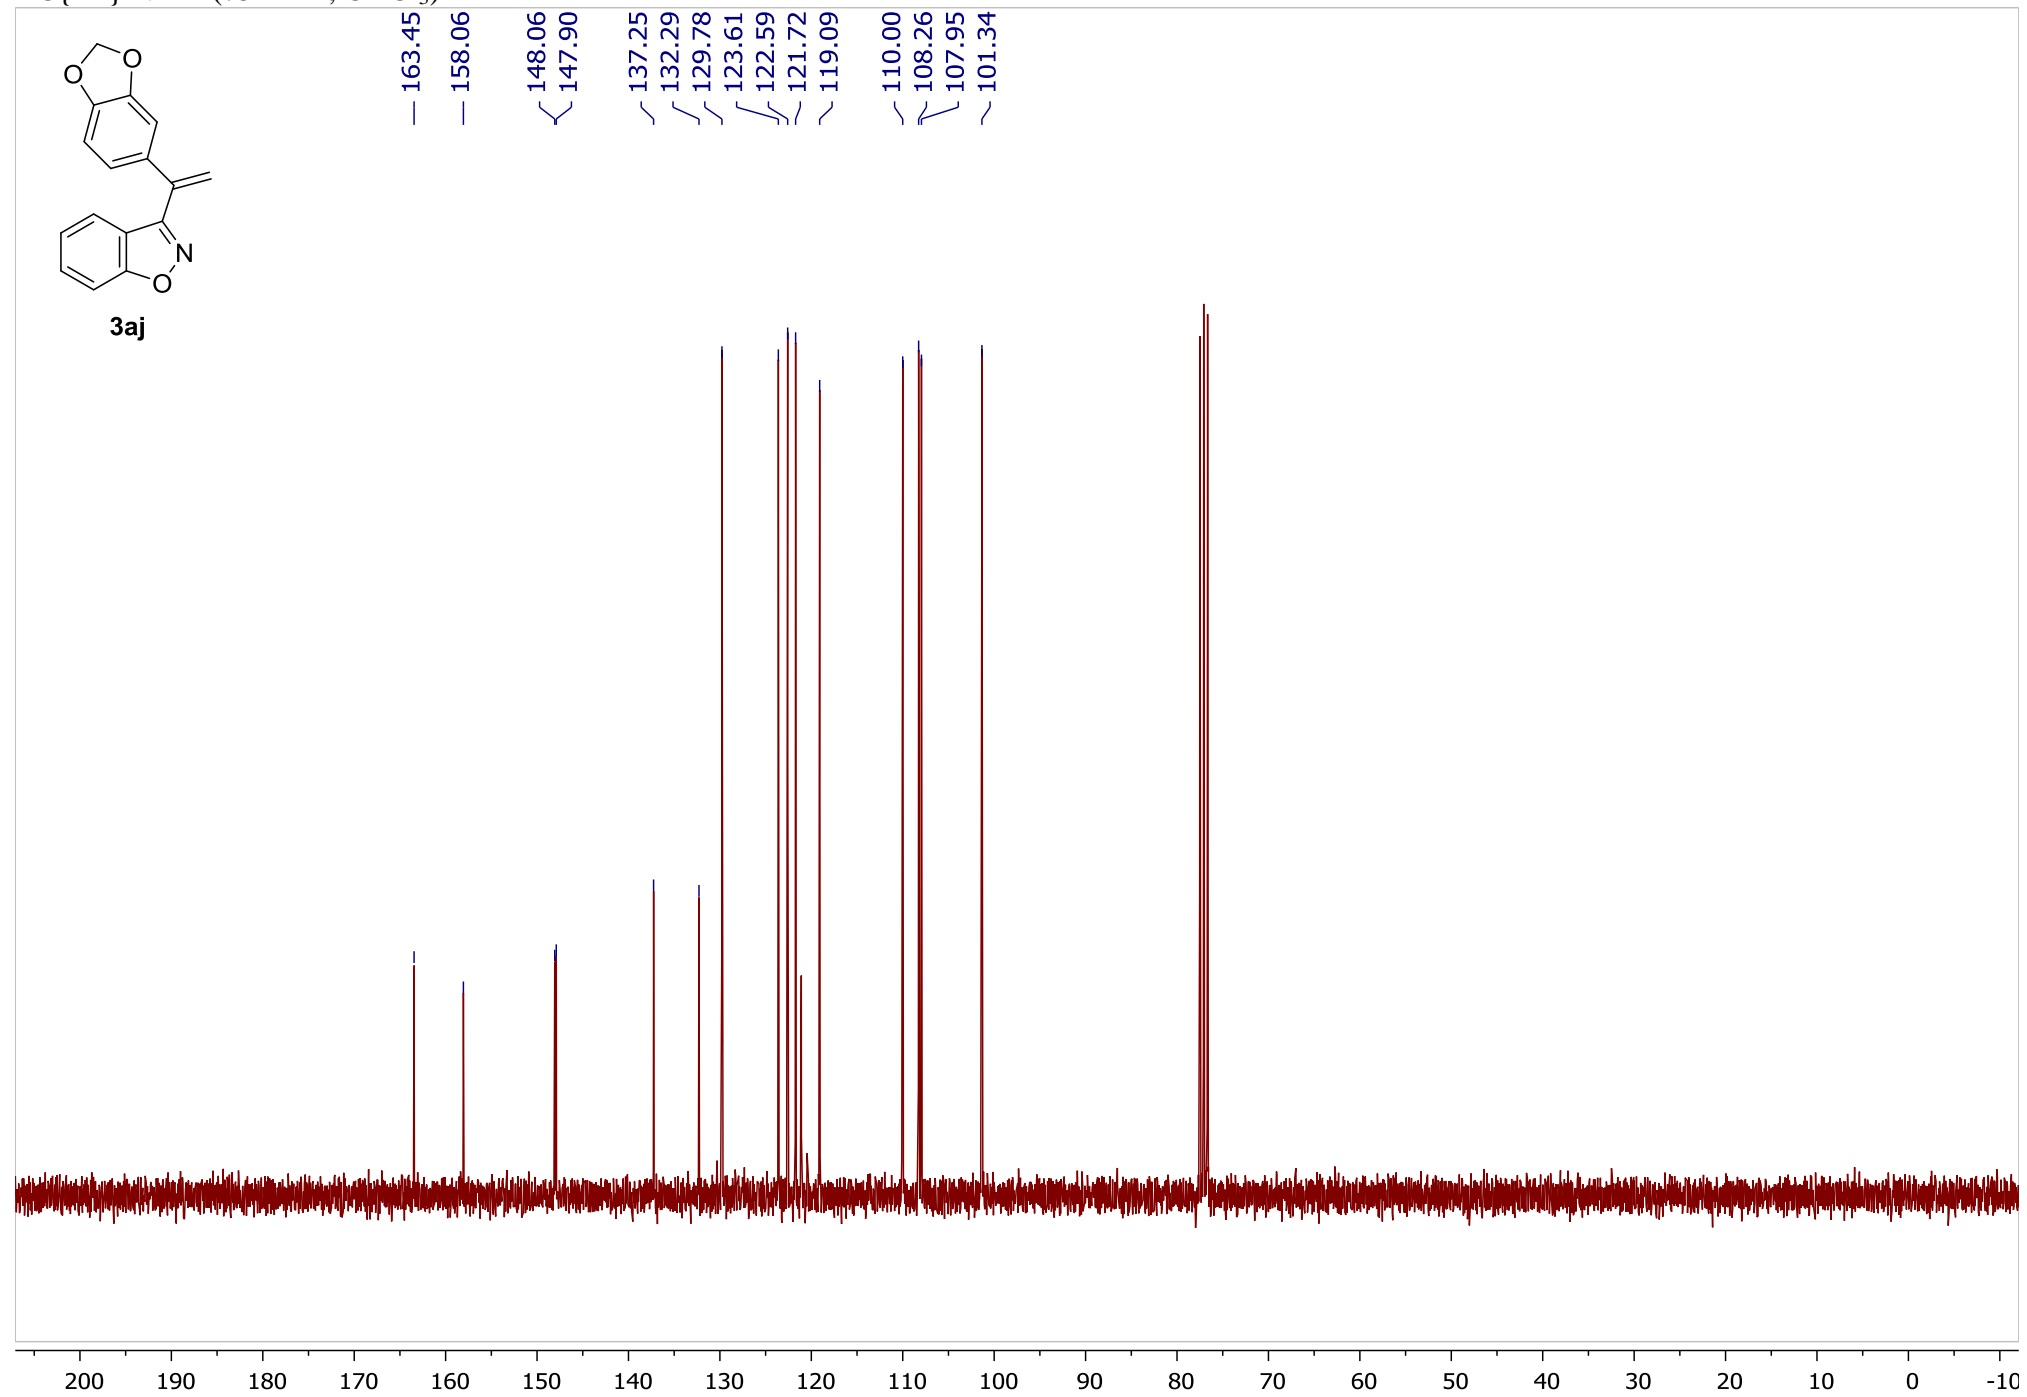

<sup>13</sup>C DEPT 135 (75 MHz, CDCl<sub>3</sub>)

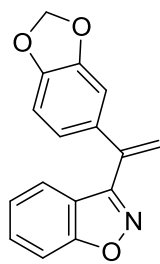

**3aj**

129.78  
123.61  
122.59  
121.72  
119.09  
110.00  
108.26  
107.95  
101.34

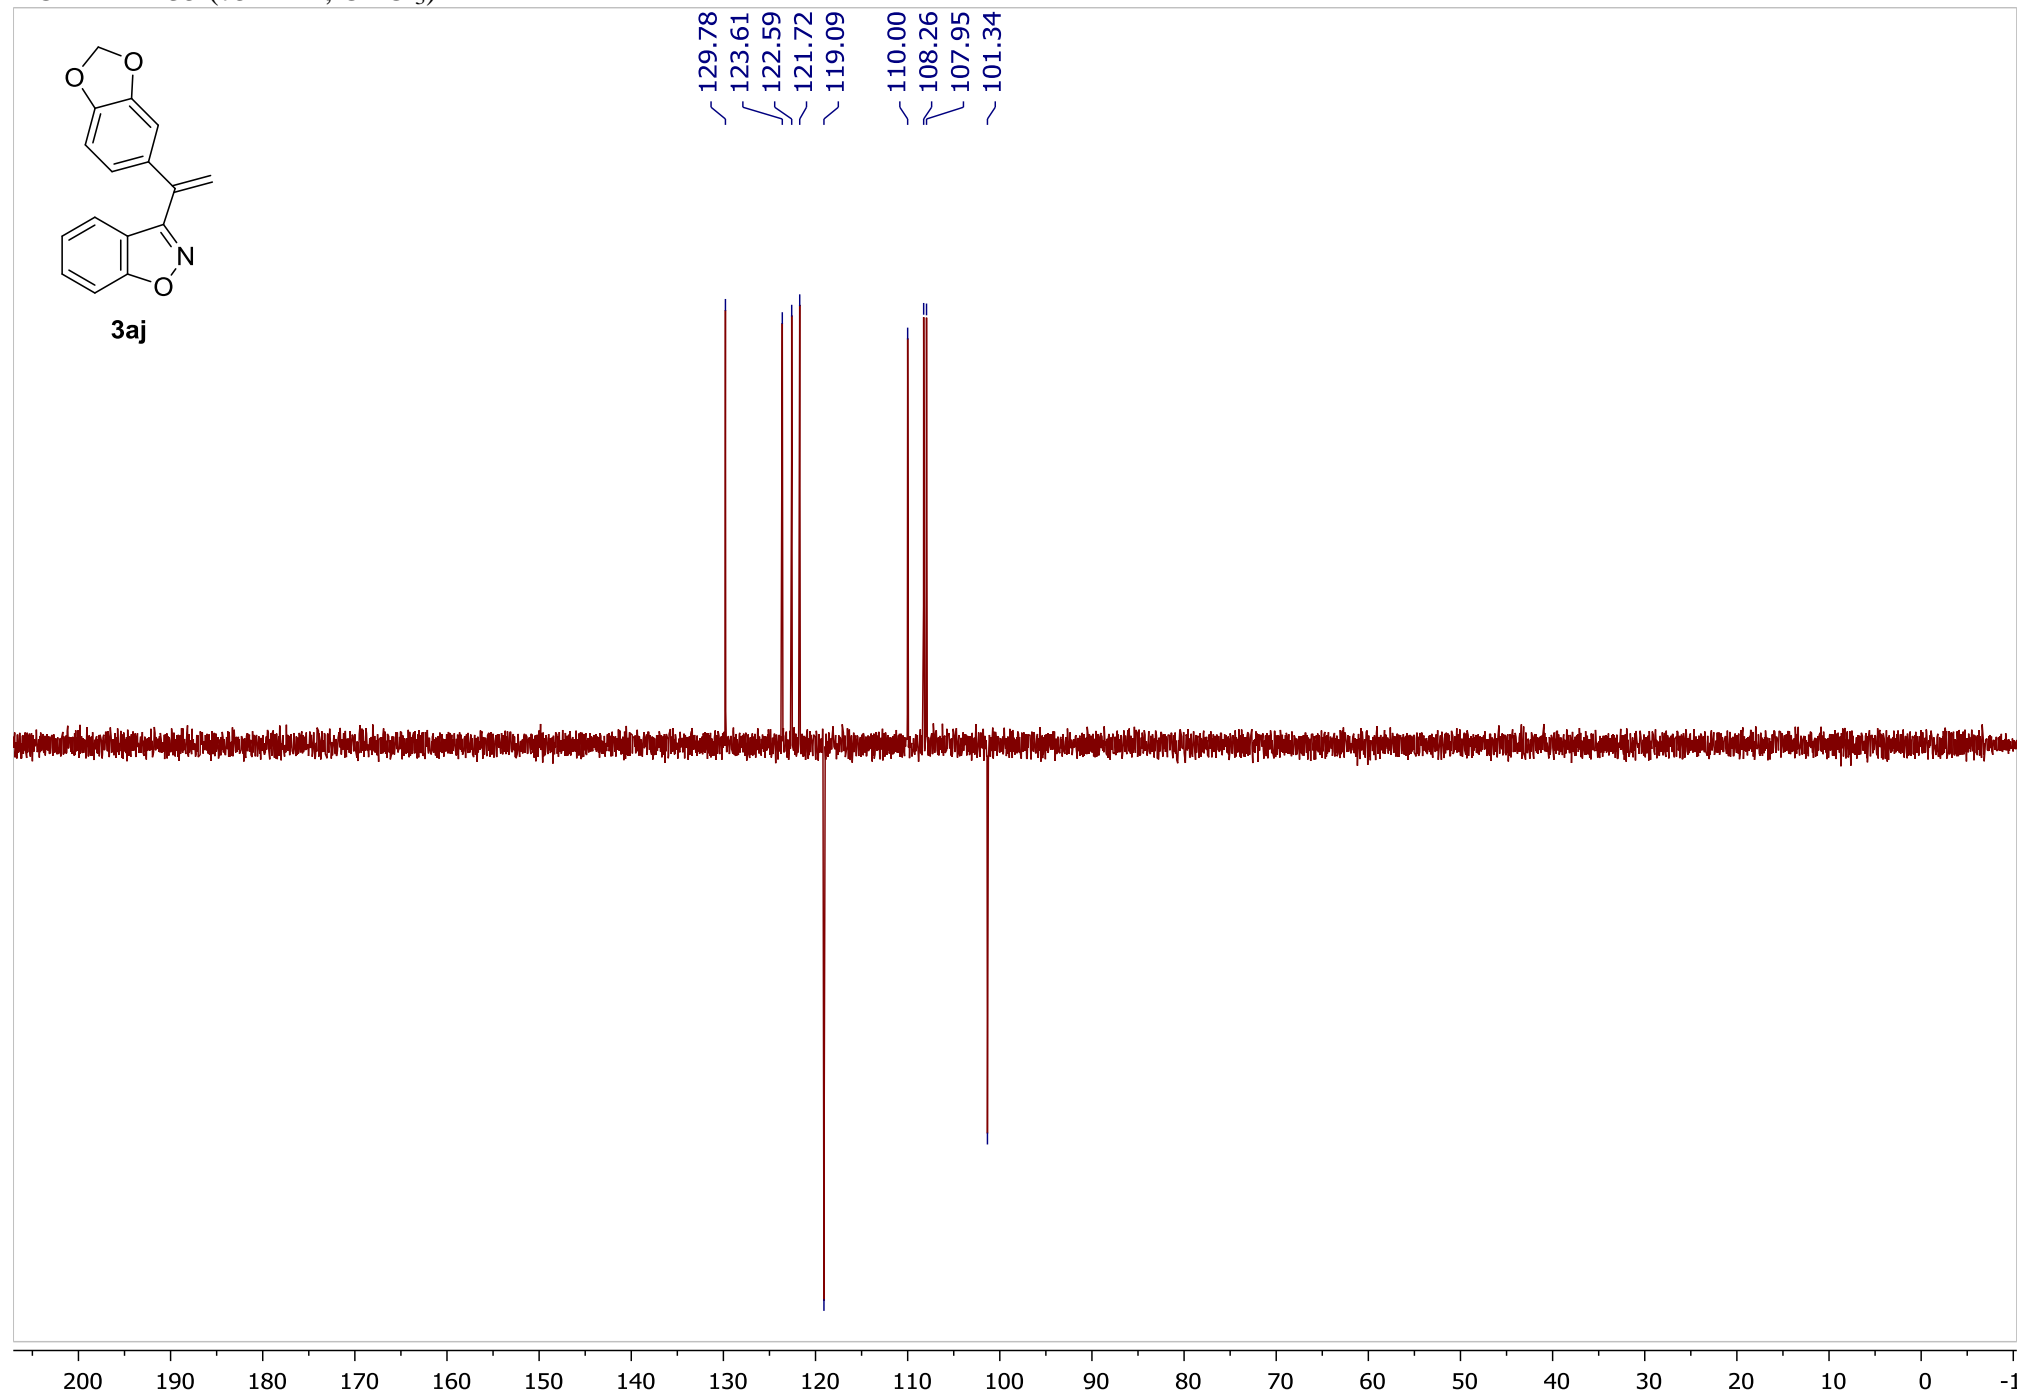

**3-(1-(2-Bromo-4,5-dimethoxyphenyl)vinyl)benzo[d]isoxazole 3ak**

<sup>1</sup>H NMR (300 MHz, CDCl<sub>3</sub>)

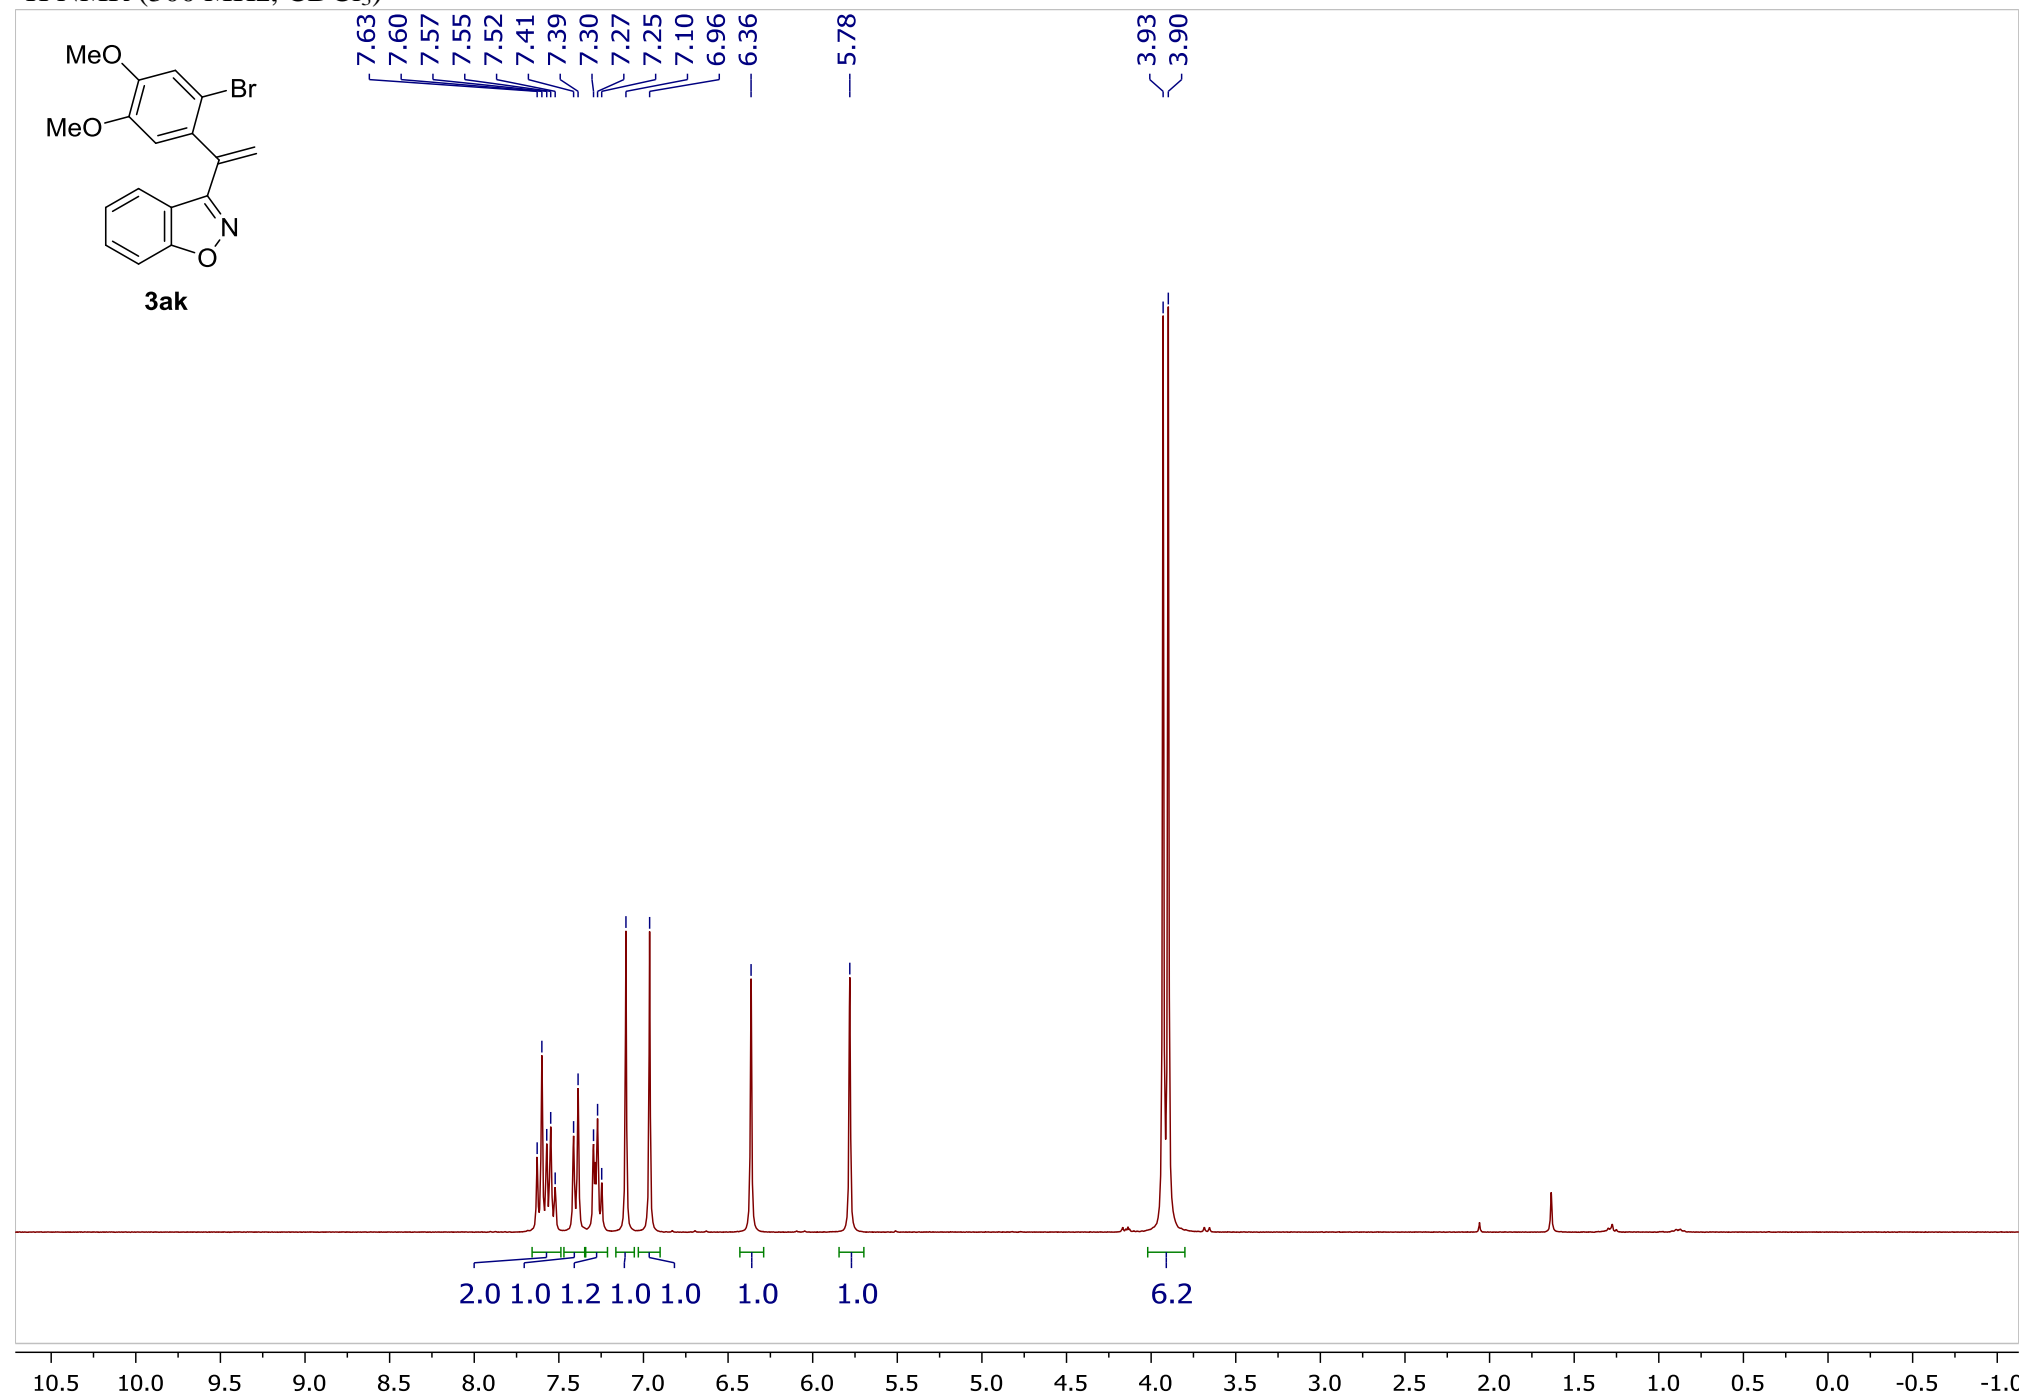

$^{13}\text{C}\{^1\text{H}\}$  NMR (75 MHz,  $\text{CDCl}_3$ )

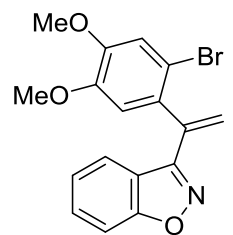

**3ak**

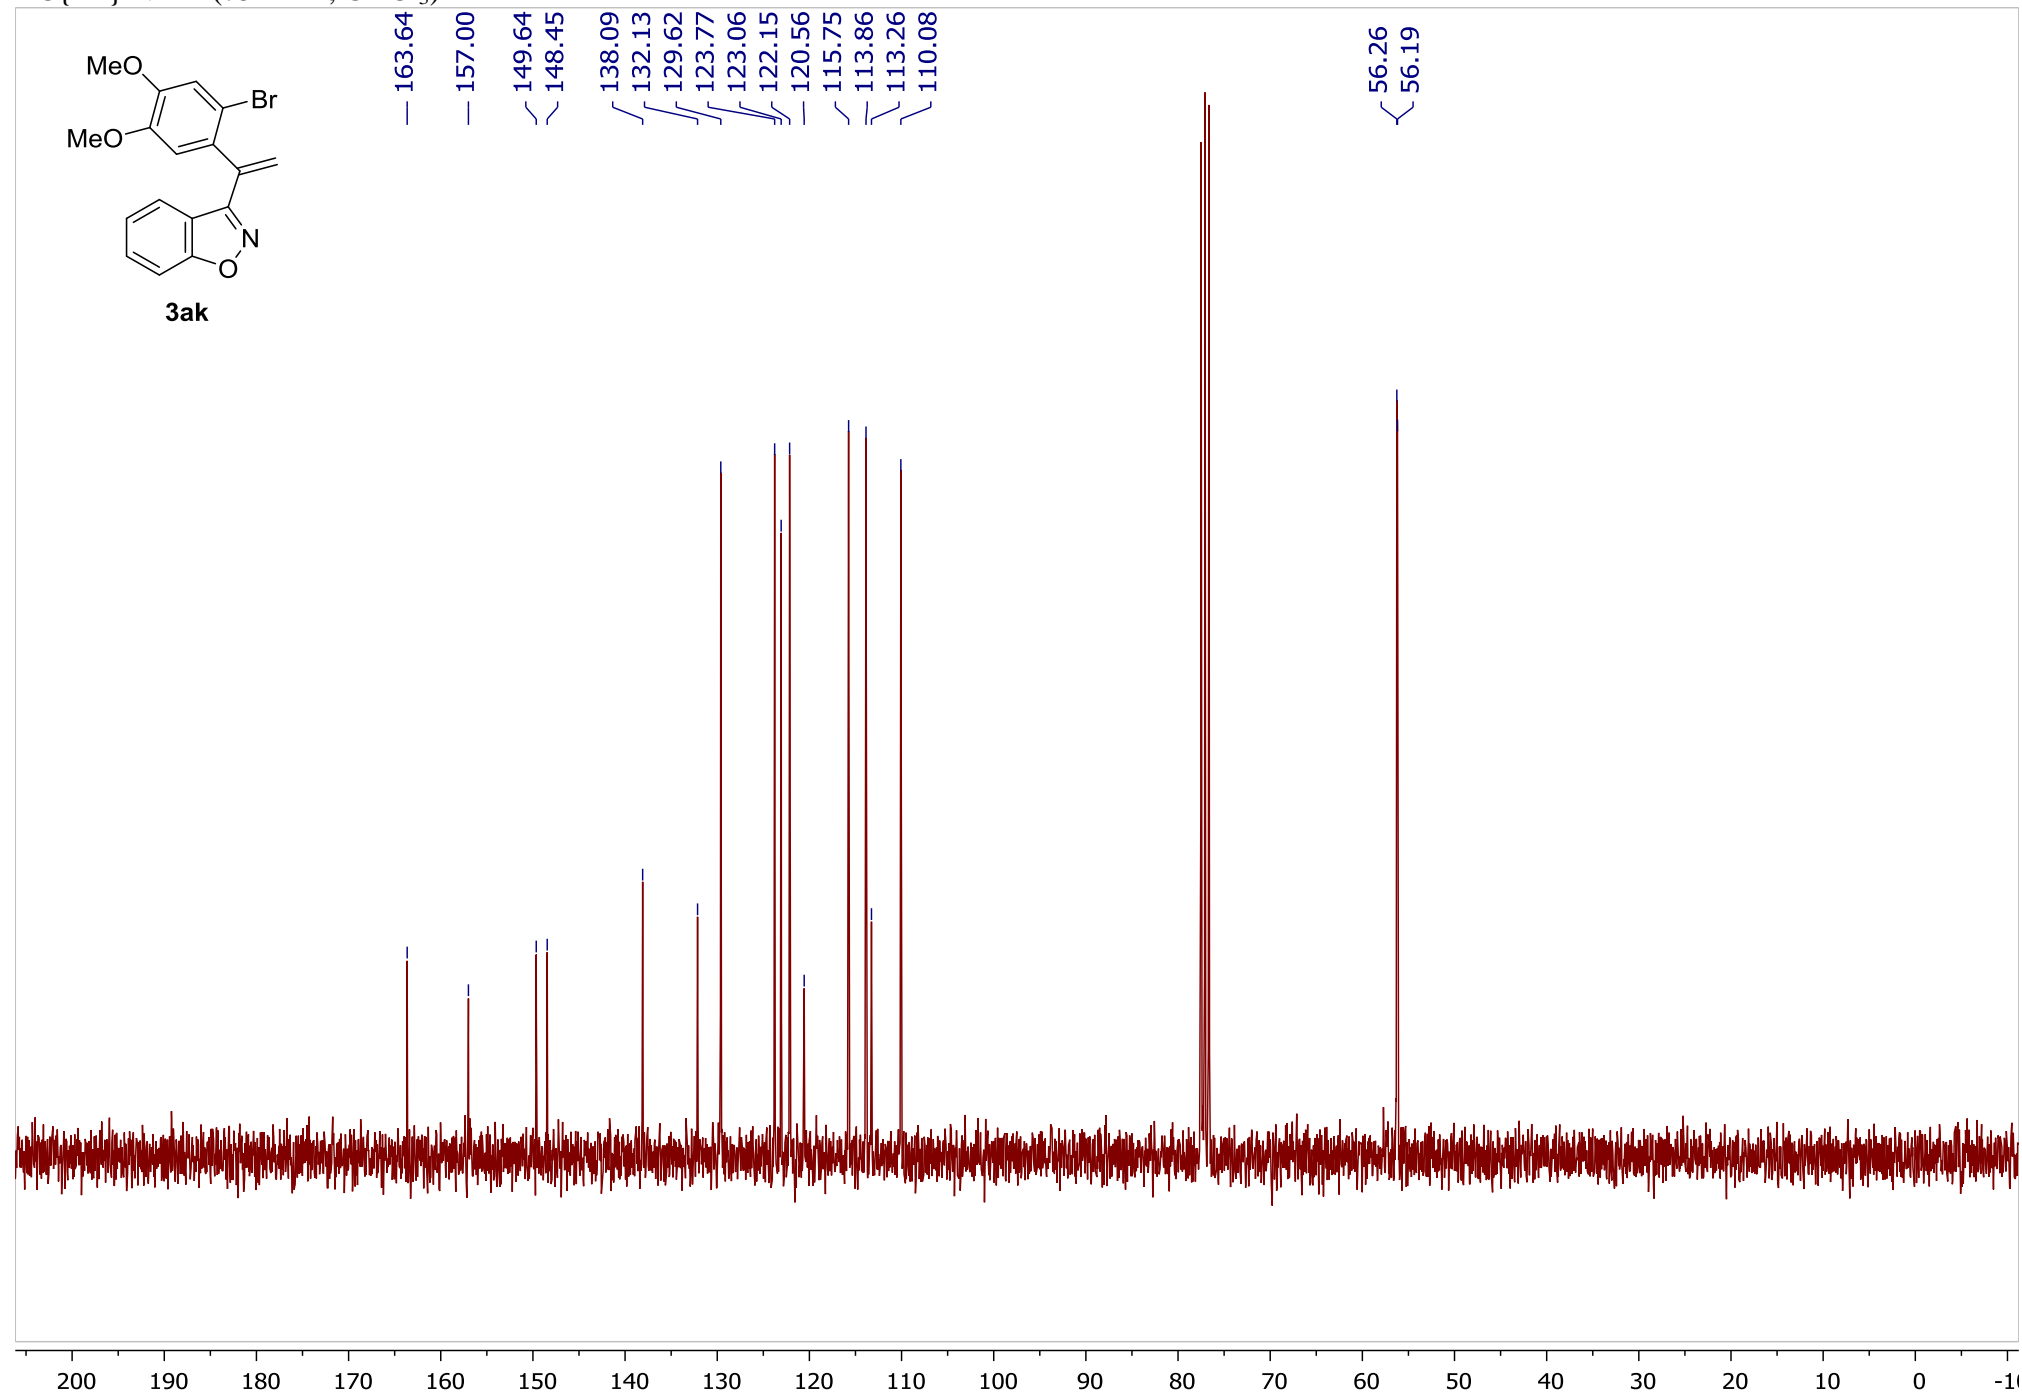



<sup>13</sup>C DEPT 135 (75 MHz, CDCl<sub>3</sub>)

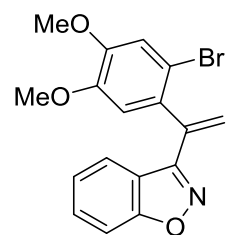

**3ak**

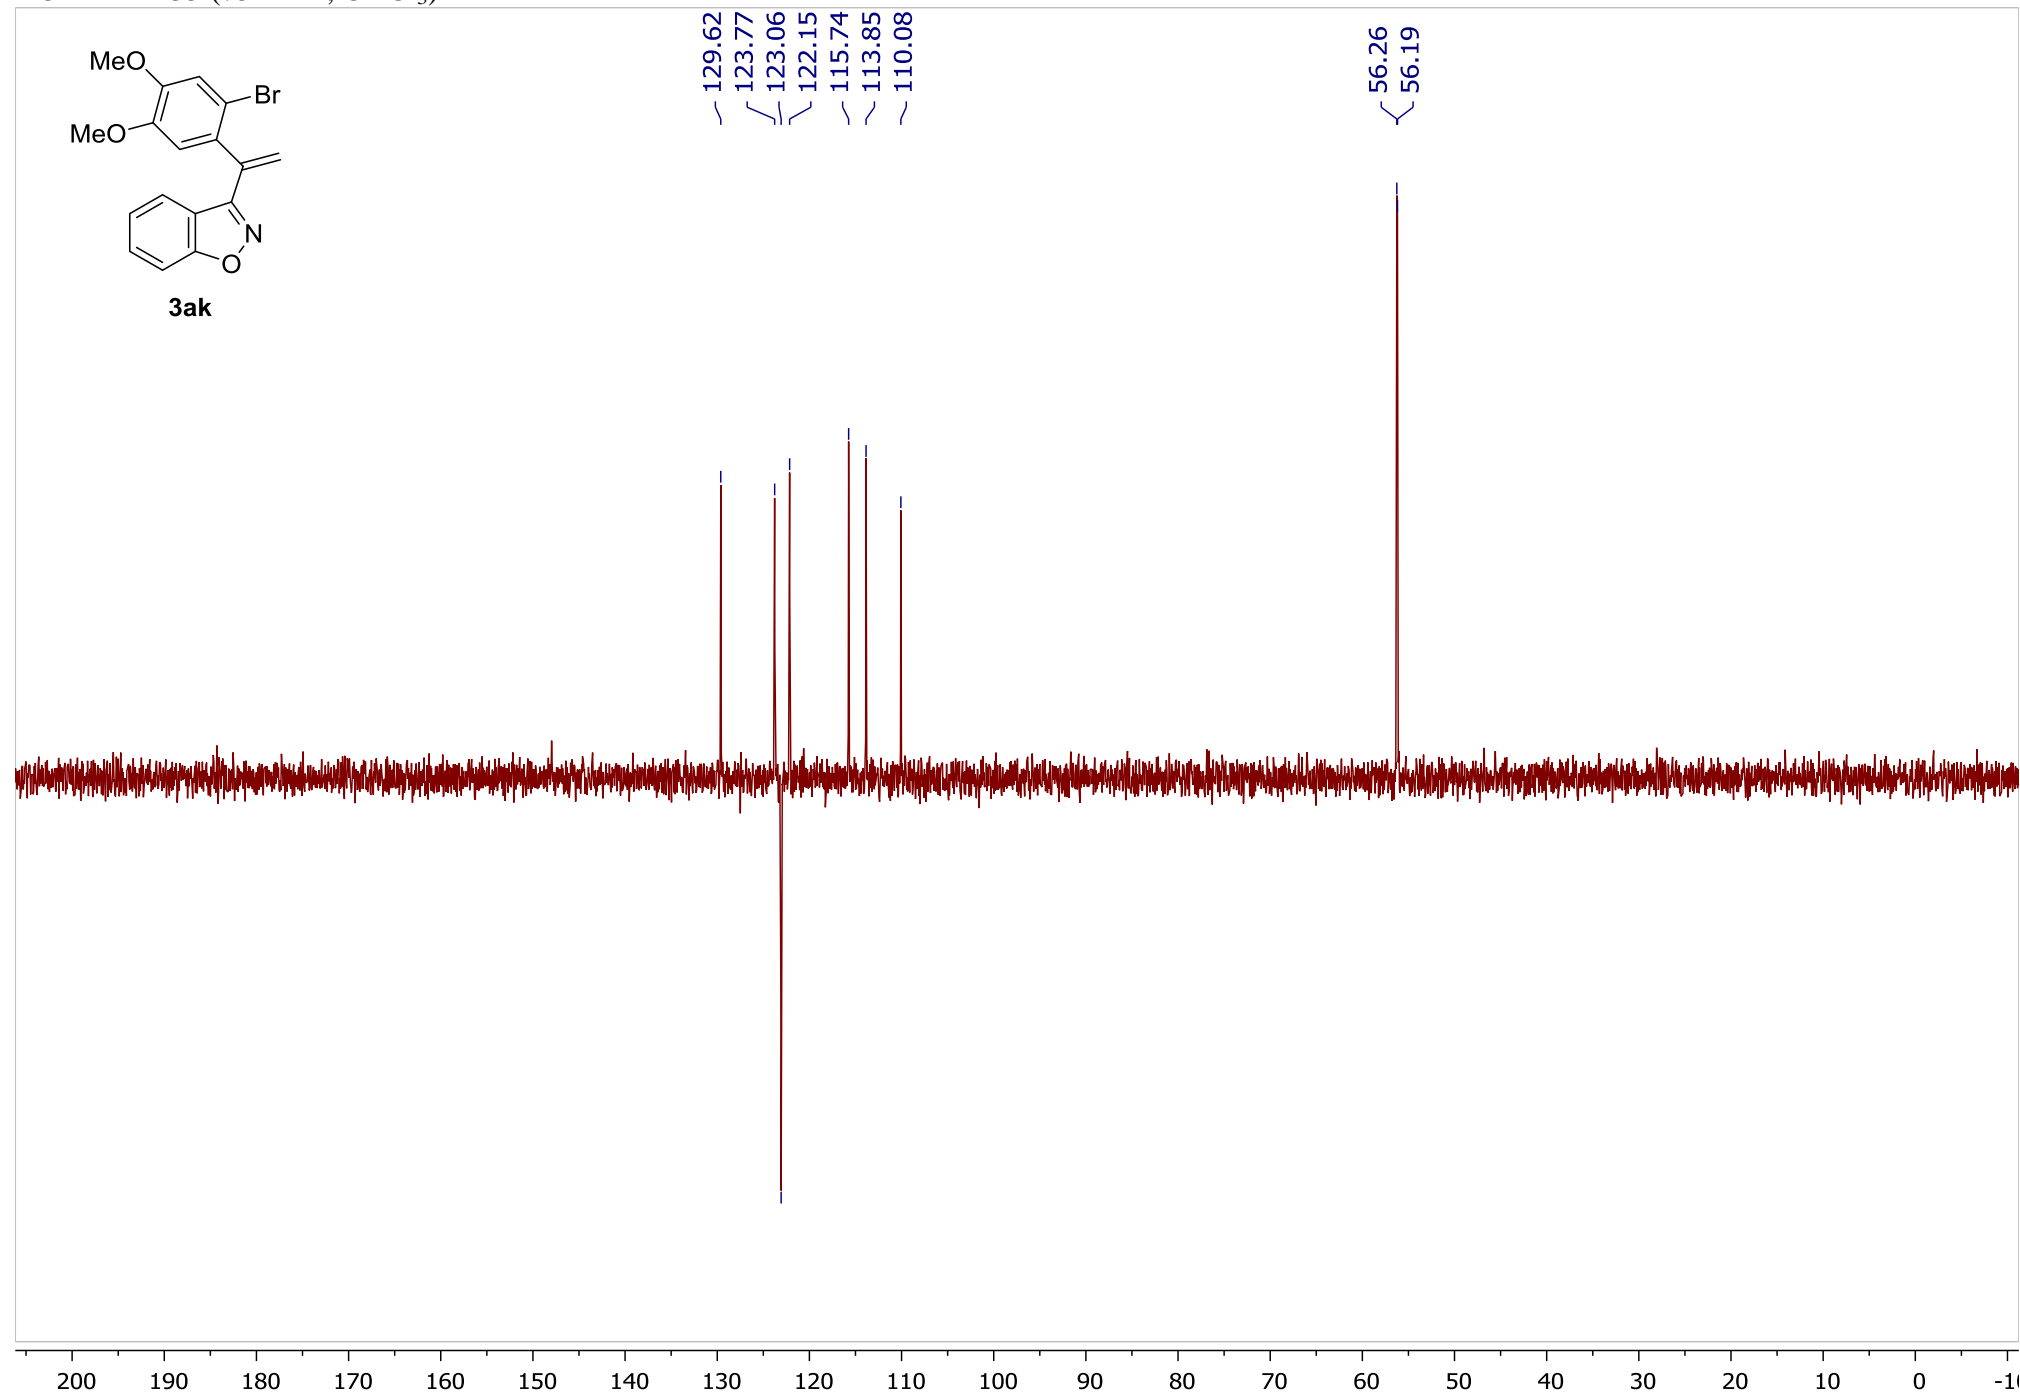

### 3-(1-Cyclopropylvinyl)benzo[d]isoxazole 3al

<sup>1</sup>H NMR (300 MHz, CDCl<sub>3</sub>)

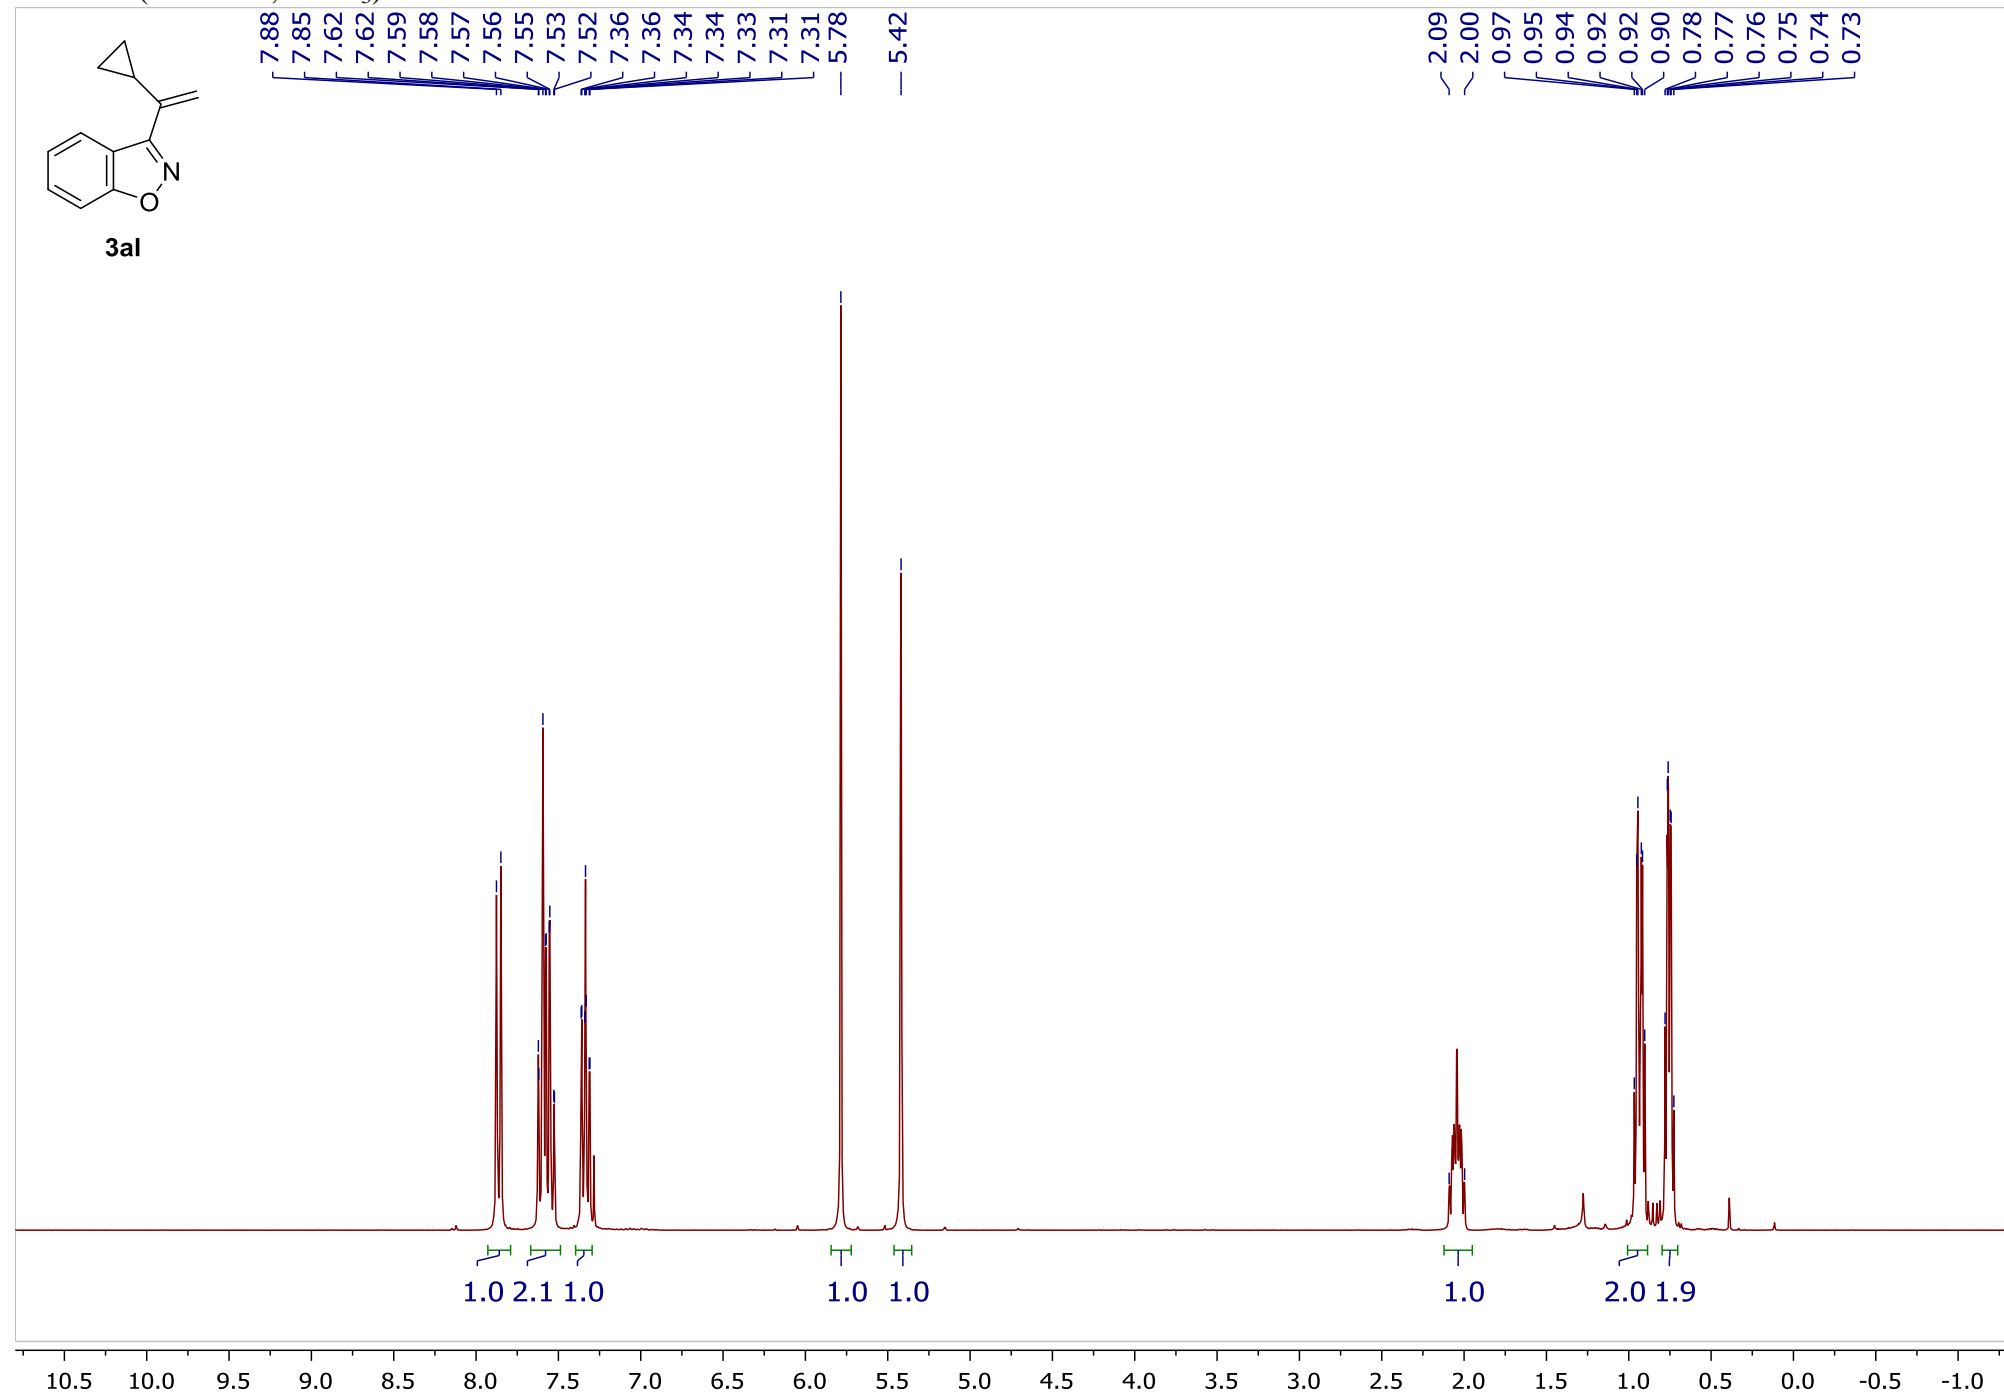

$^{13}\text{C}\{^1\text{H}\}$  NMR (75 MHz,  $\text{CDCl}_3$ )

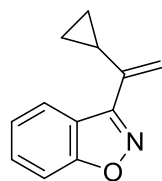

**3aI**

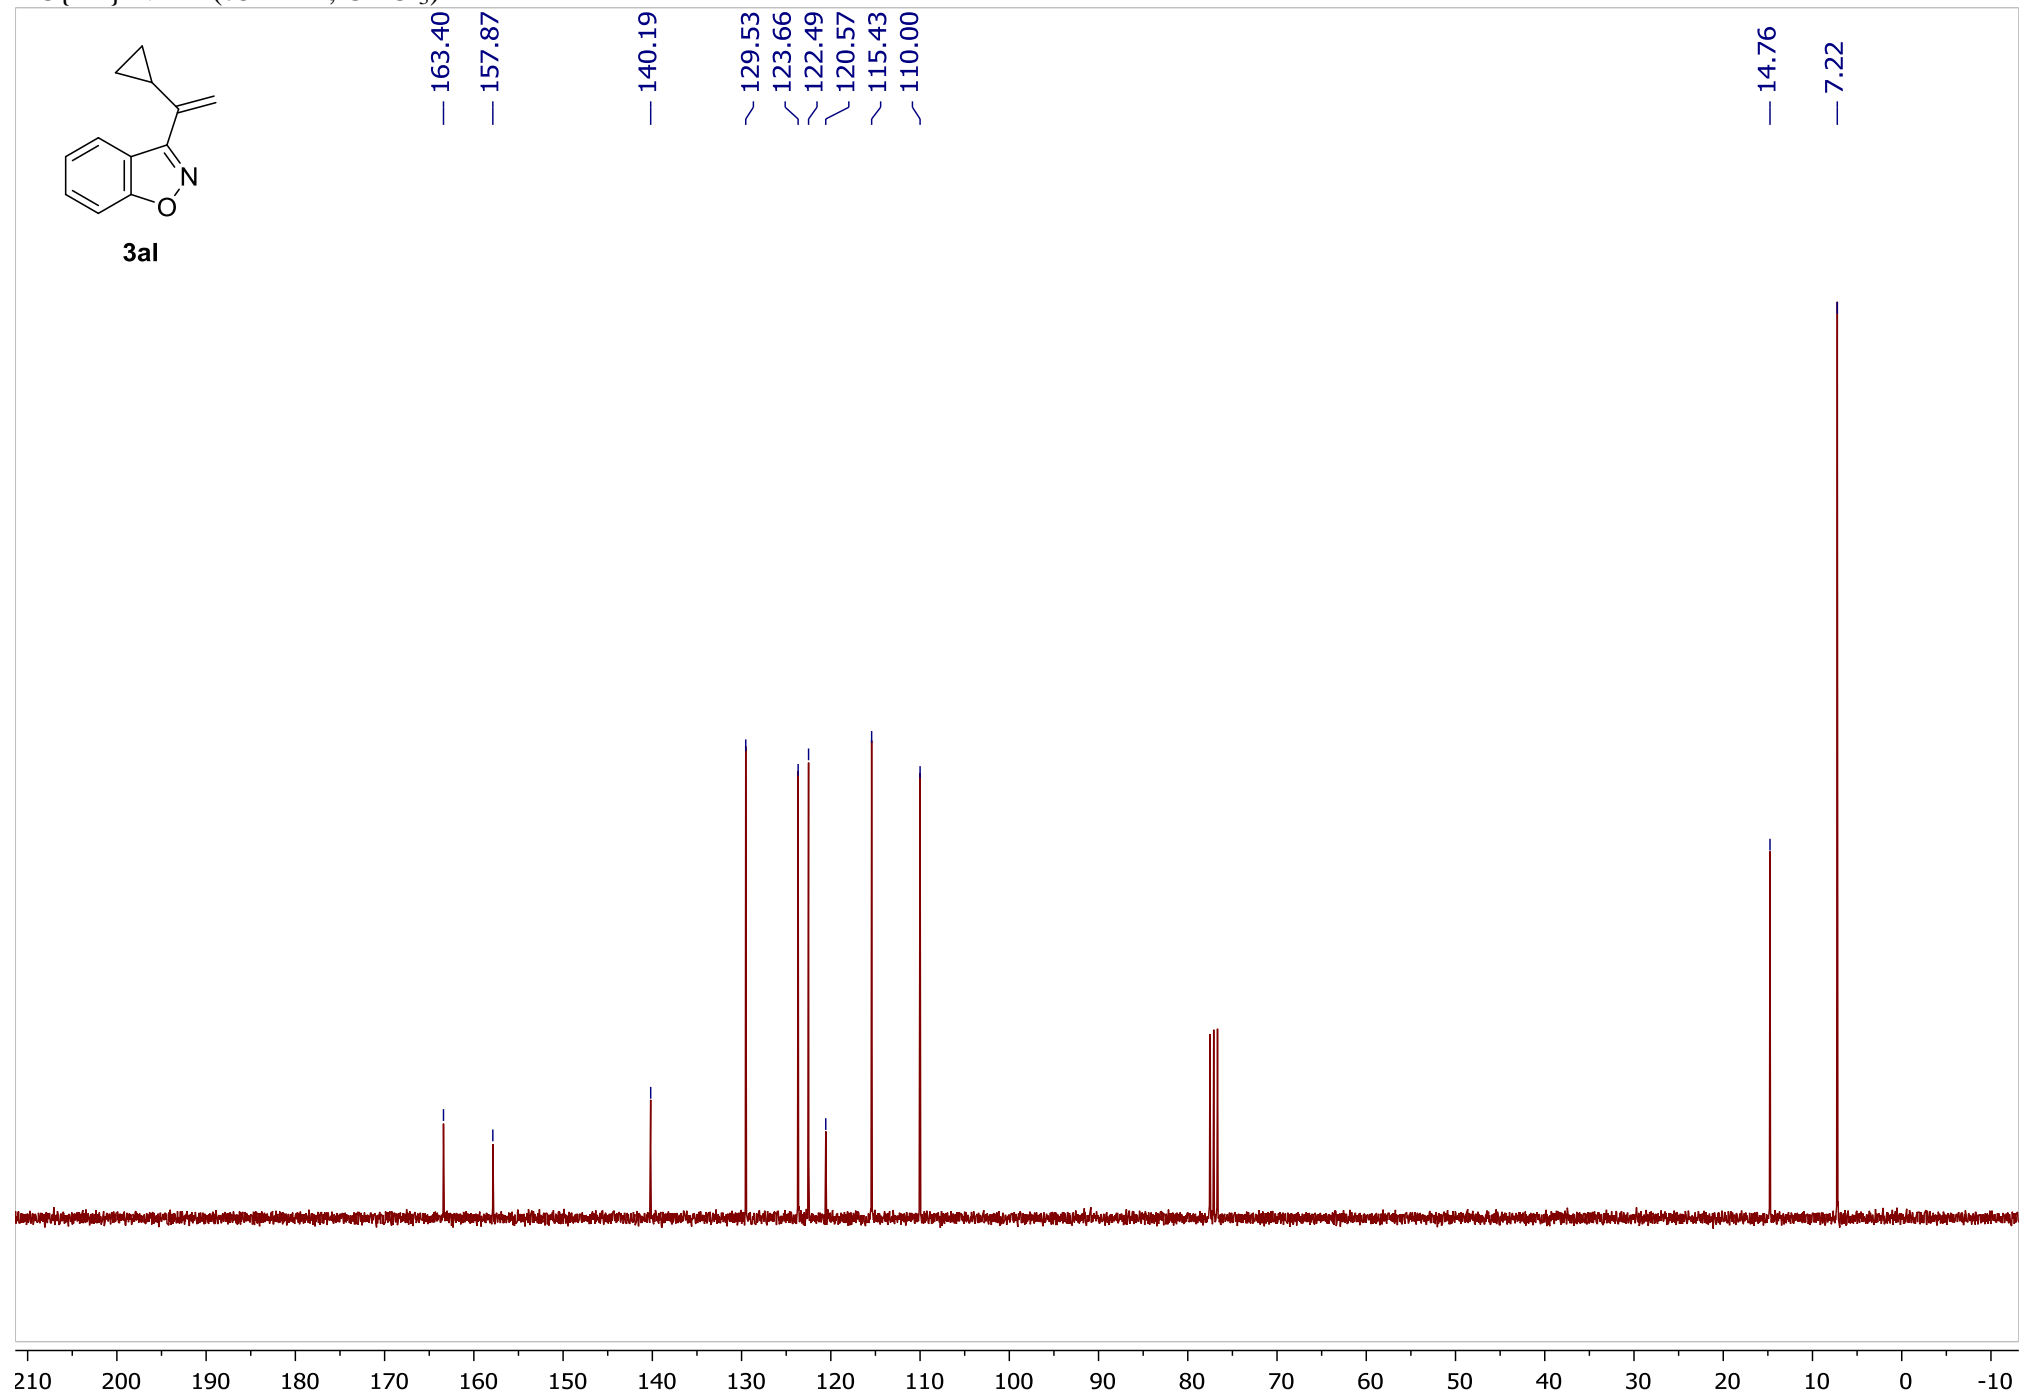

$^{13}\text{C}$  DEPT 135 (75 MHz,  $\text{CDCl}_3$ )

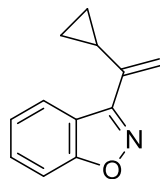

**3al**

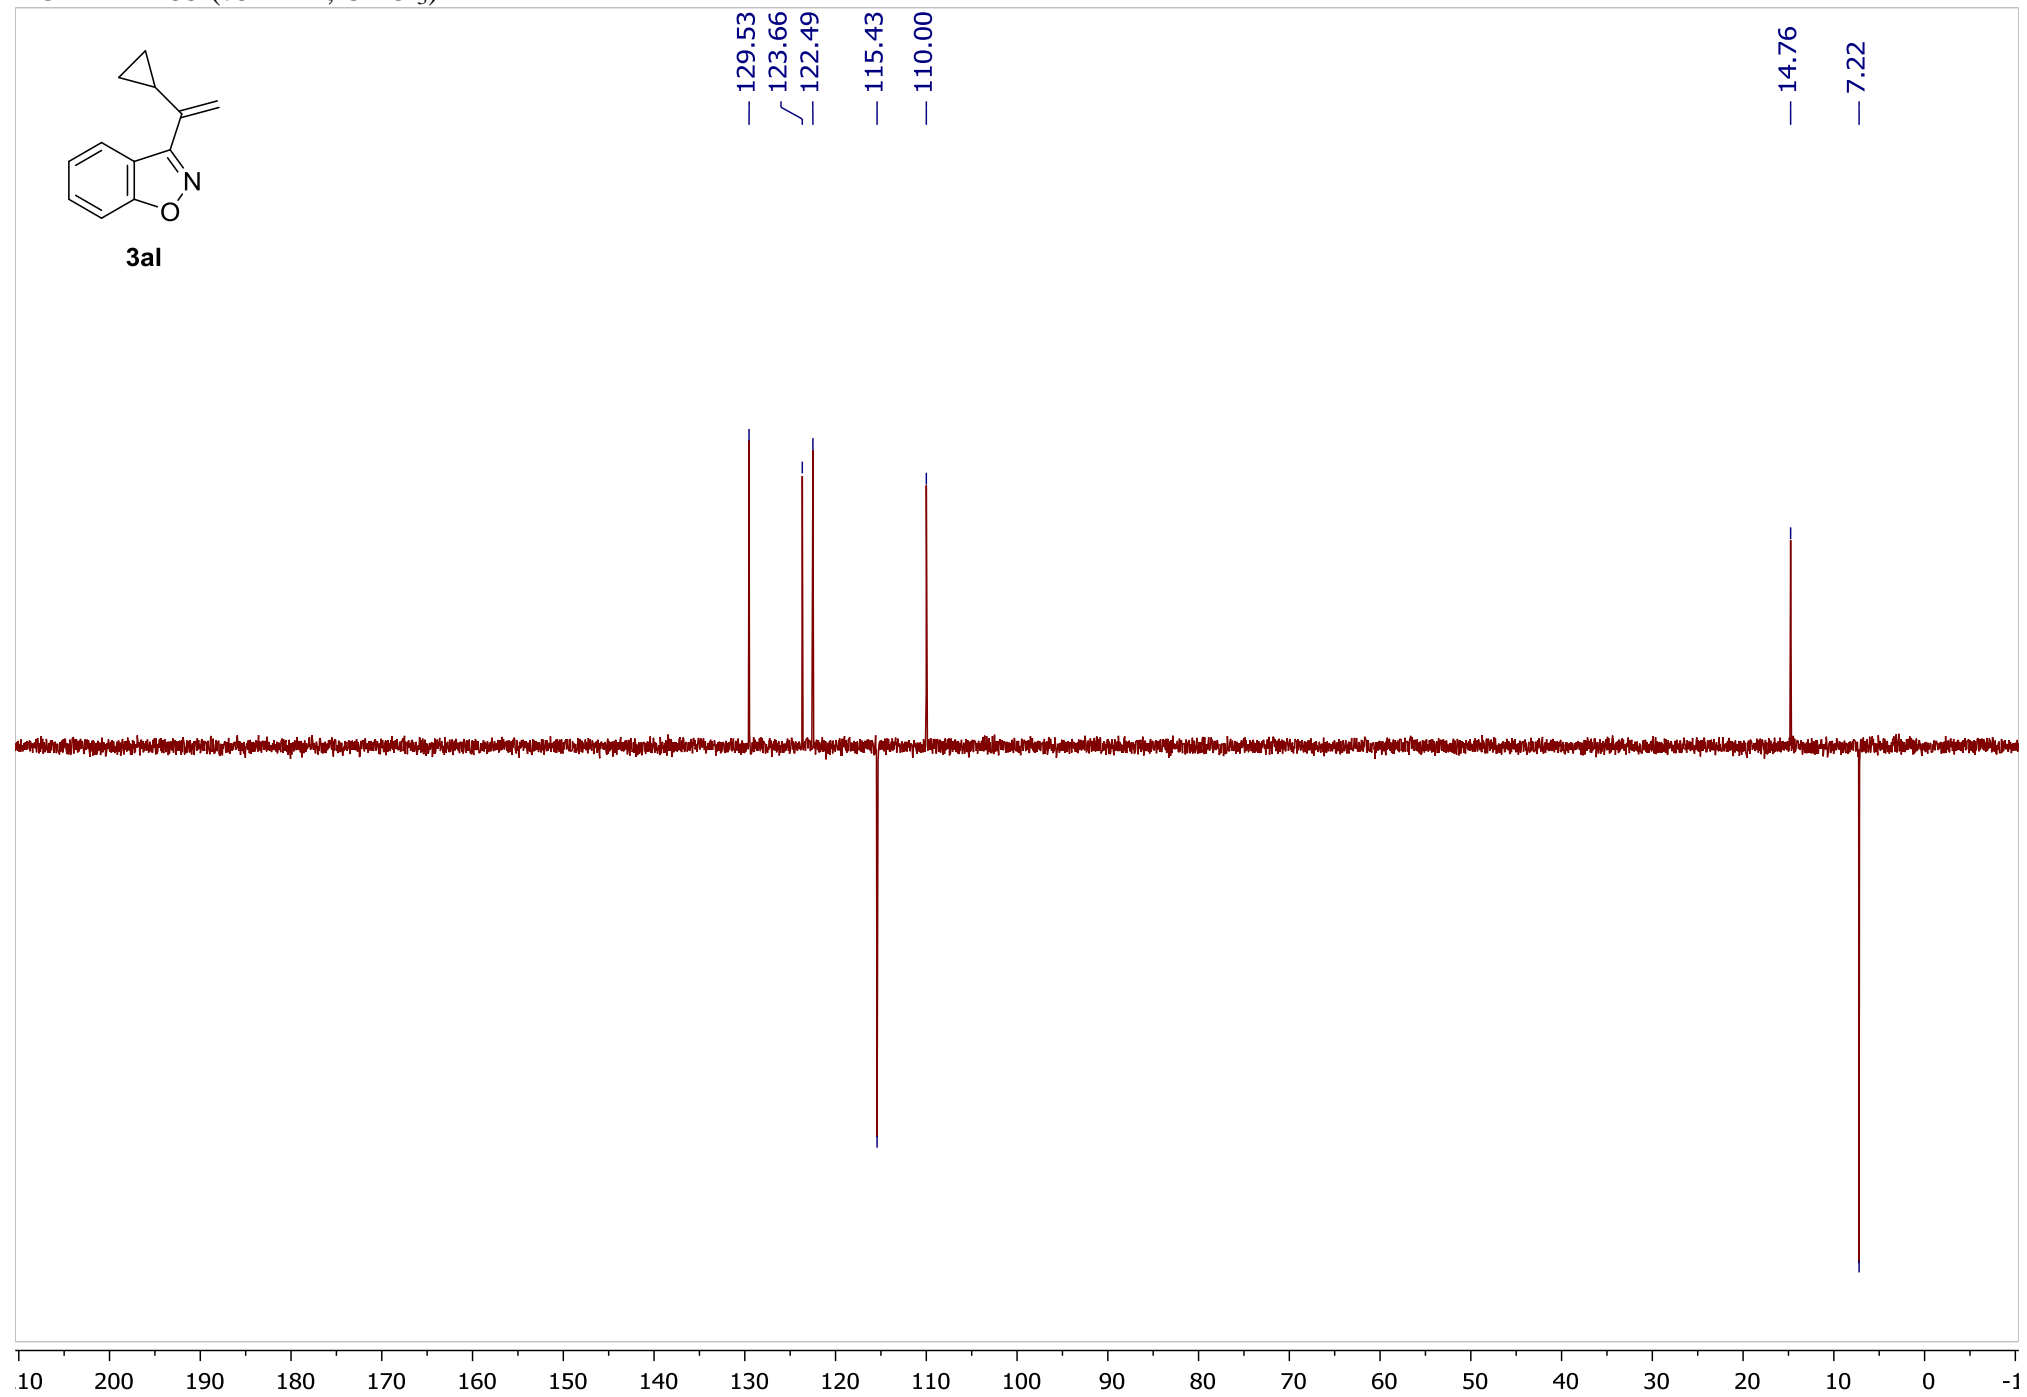

**3-(4-Phenylbut-1-en-2-yl)benzo[d]isoxazole 3am**

<sup>1</sup>H NMR (300 MHz, CDCl<sub>3</sub>)

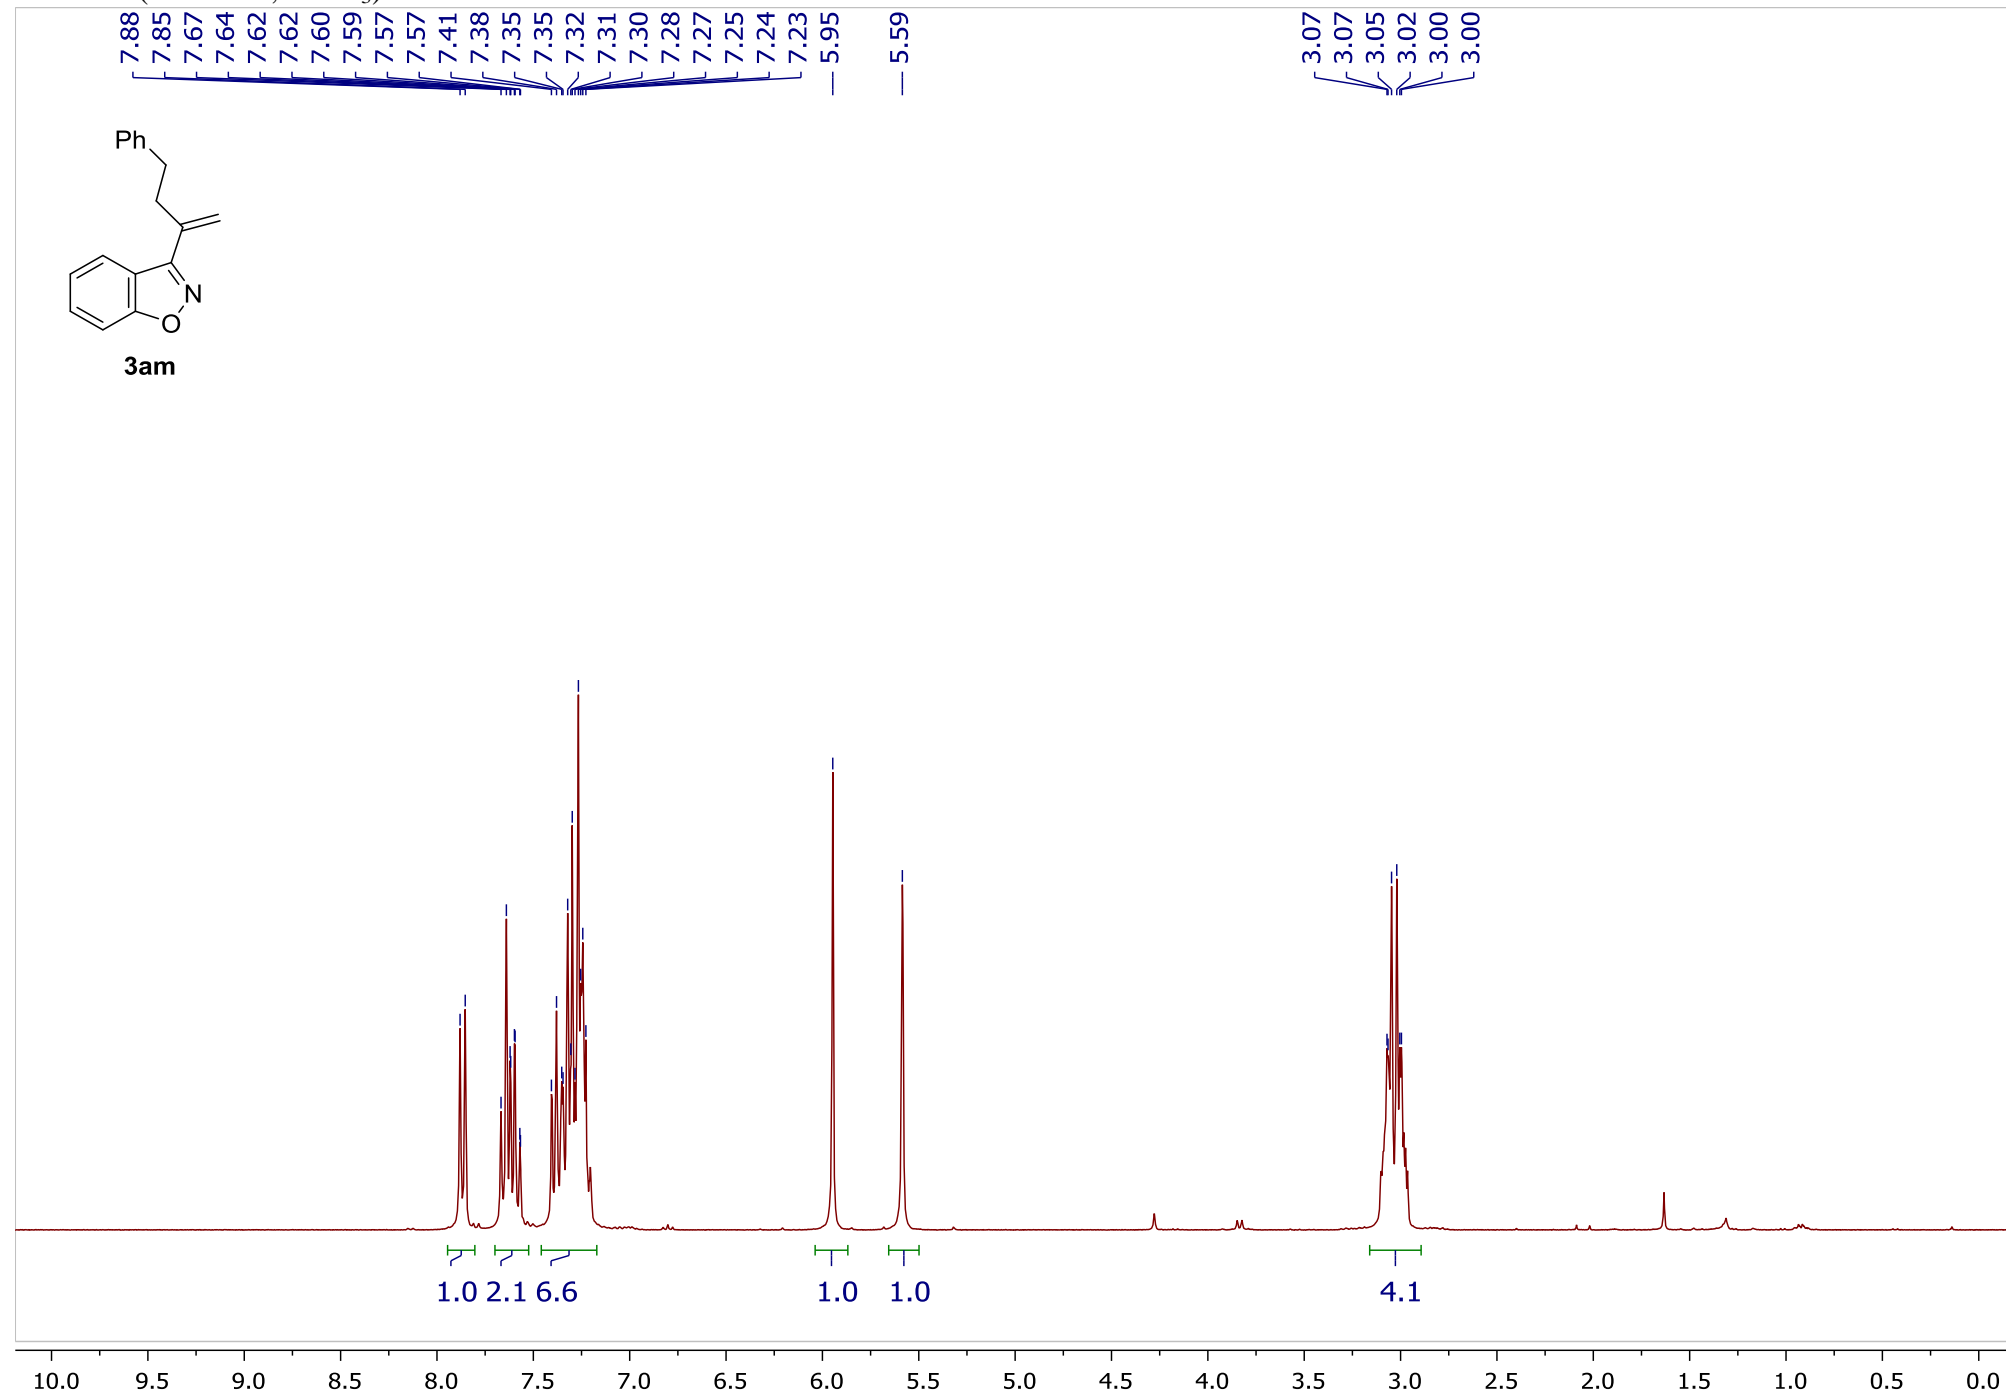

$^{13}\text{C}\{^1\text{H}\}$  NMR (75 MHz,  $\text{CDCl}_3$ )

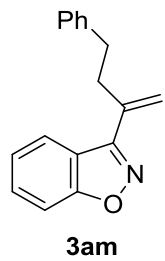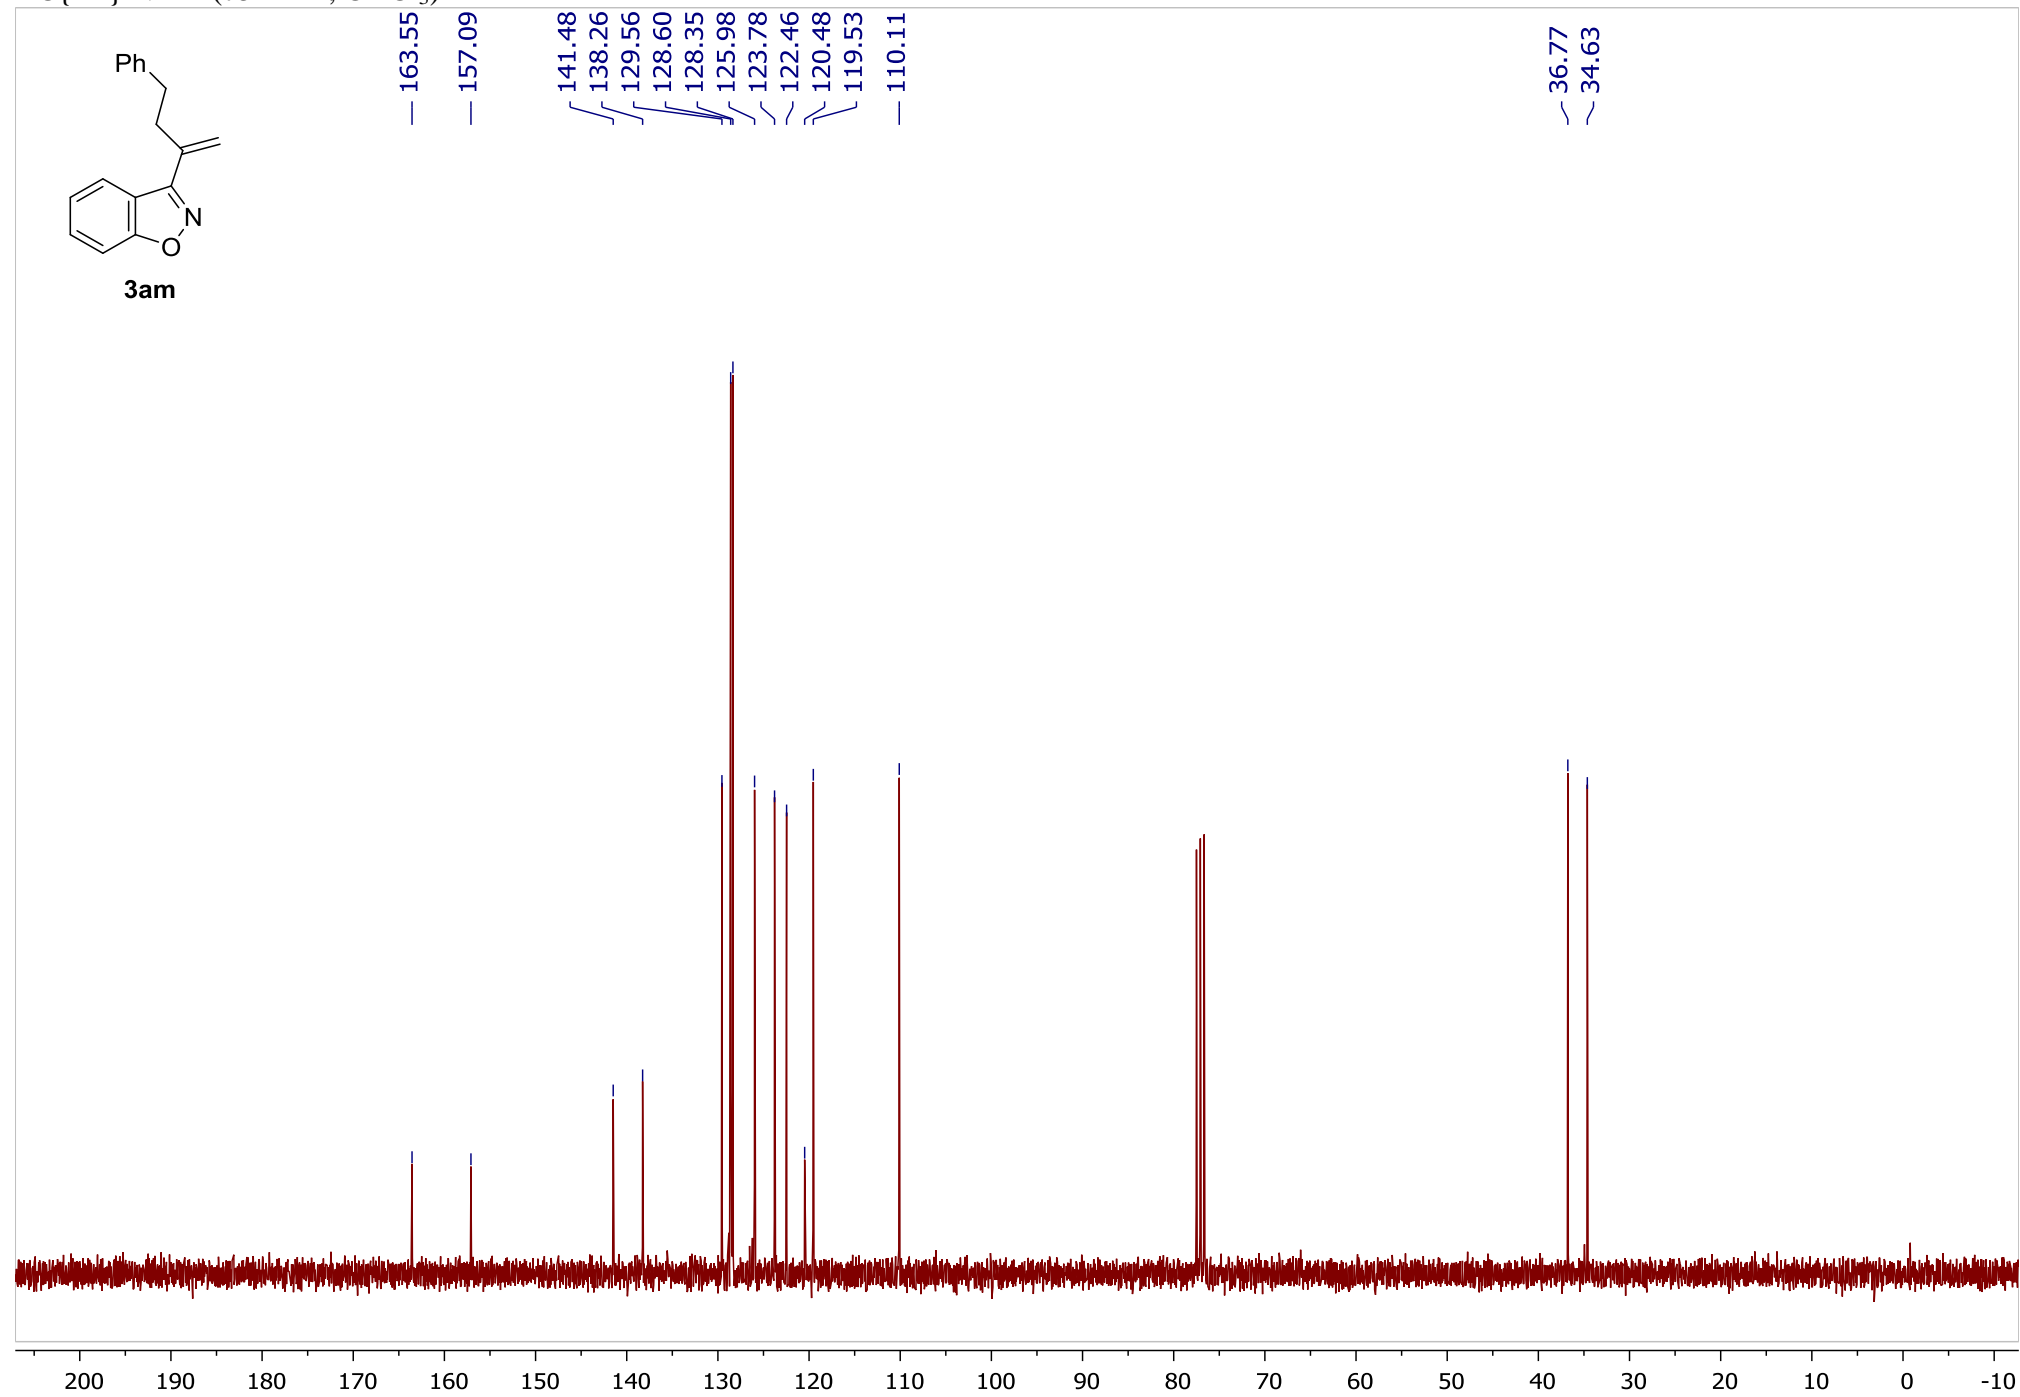

<sup>13</sup>C DEPT 135 (75 MHz, CDCl<sub>3</sub>)

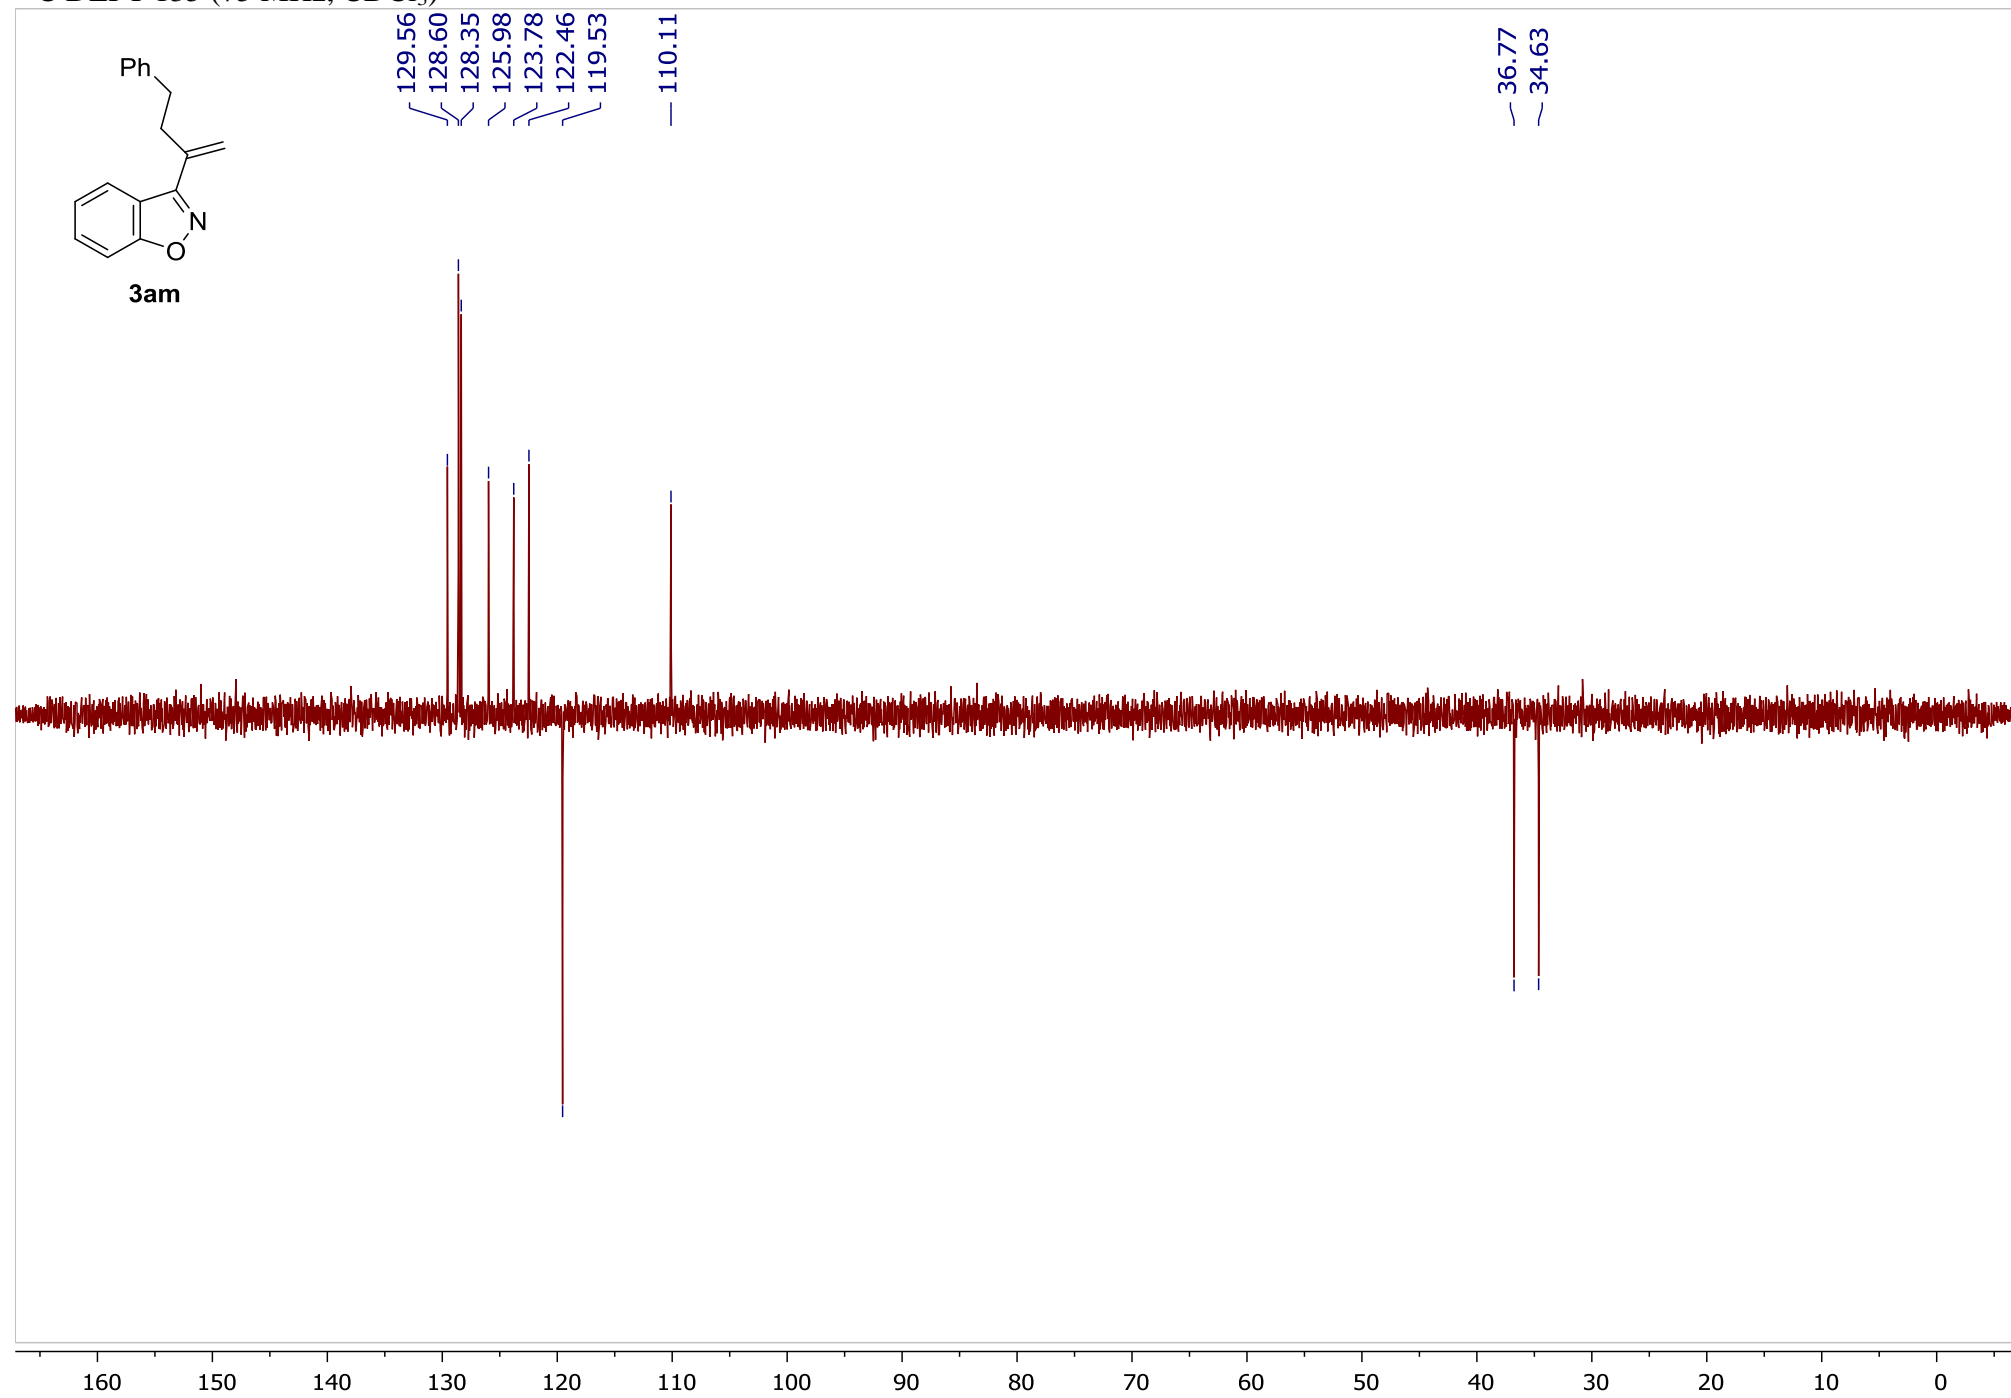

**4-Methoxy-3-(1-(4-methoxyphenyl)vinyl)benzo[d]isoxazole 3ba**

<sup>1</sup>H NMR (300 MHz, CDCl<sub>3</sub>)

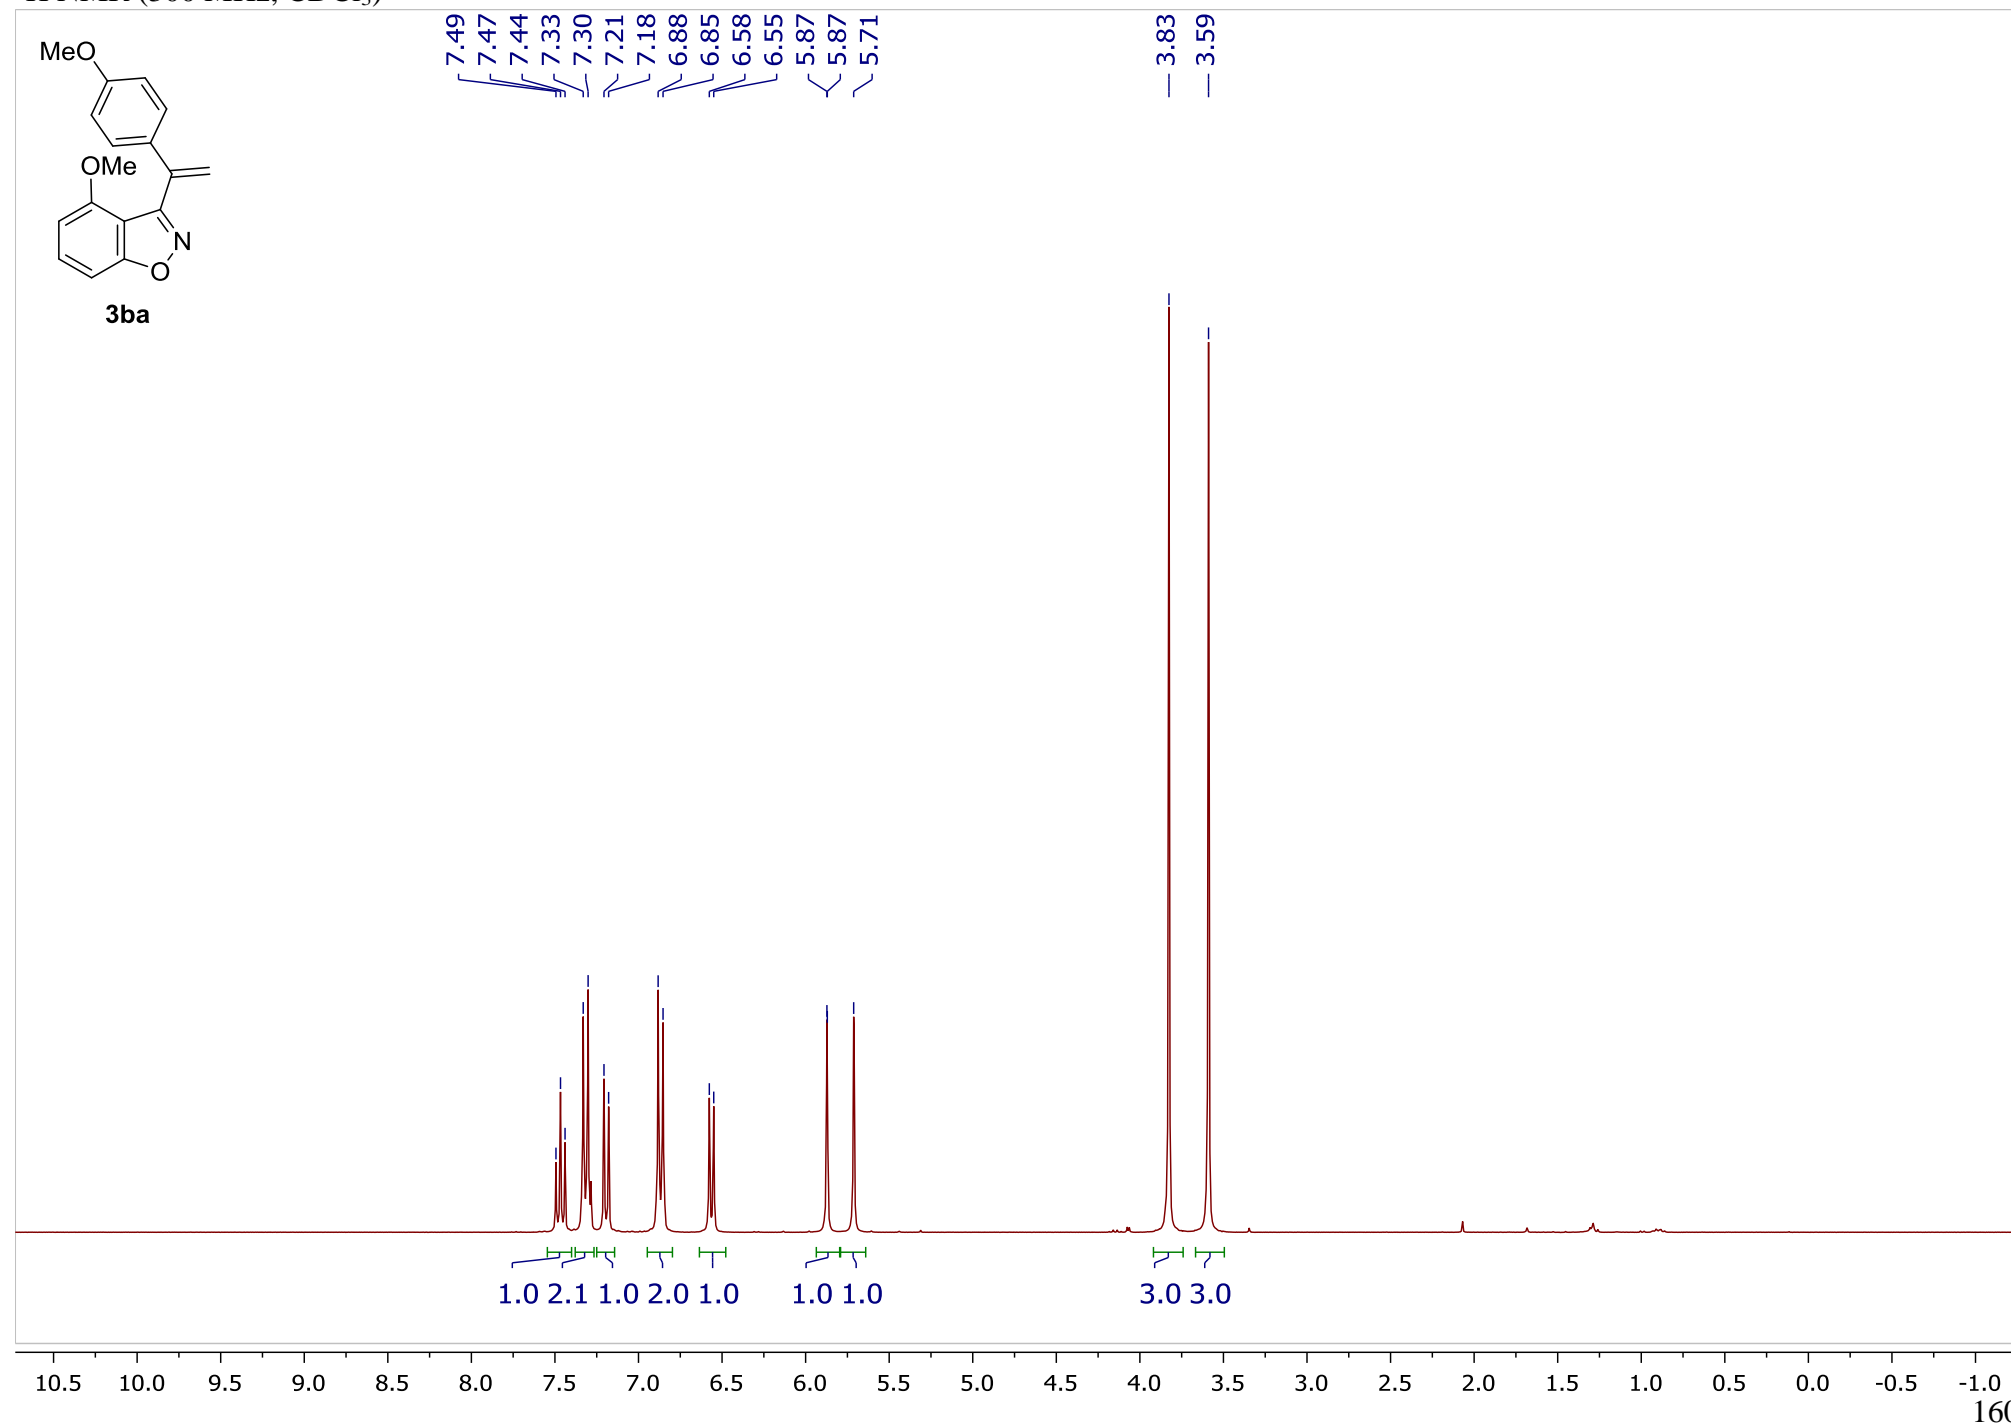



$^{13}\text{C}\{^1\text{H}\}$  NMR (75 MHz,  $\text{CDCl}_3$ )

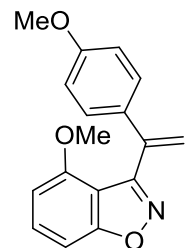

**3ba**

165.20  
159.49  
158.00  
154.71

137.38  
131.70  
131.52  
127.96

117.94  
113.55  
111.83

103.66  
102.42

55.51  
55.30

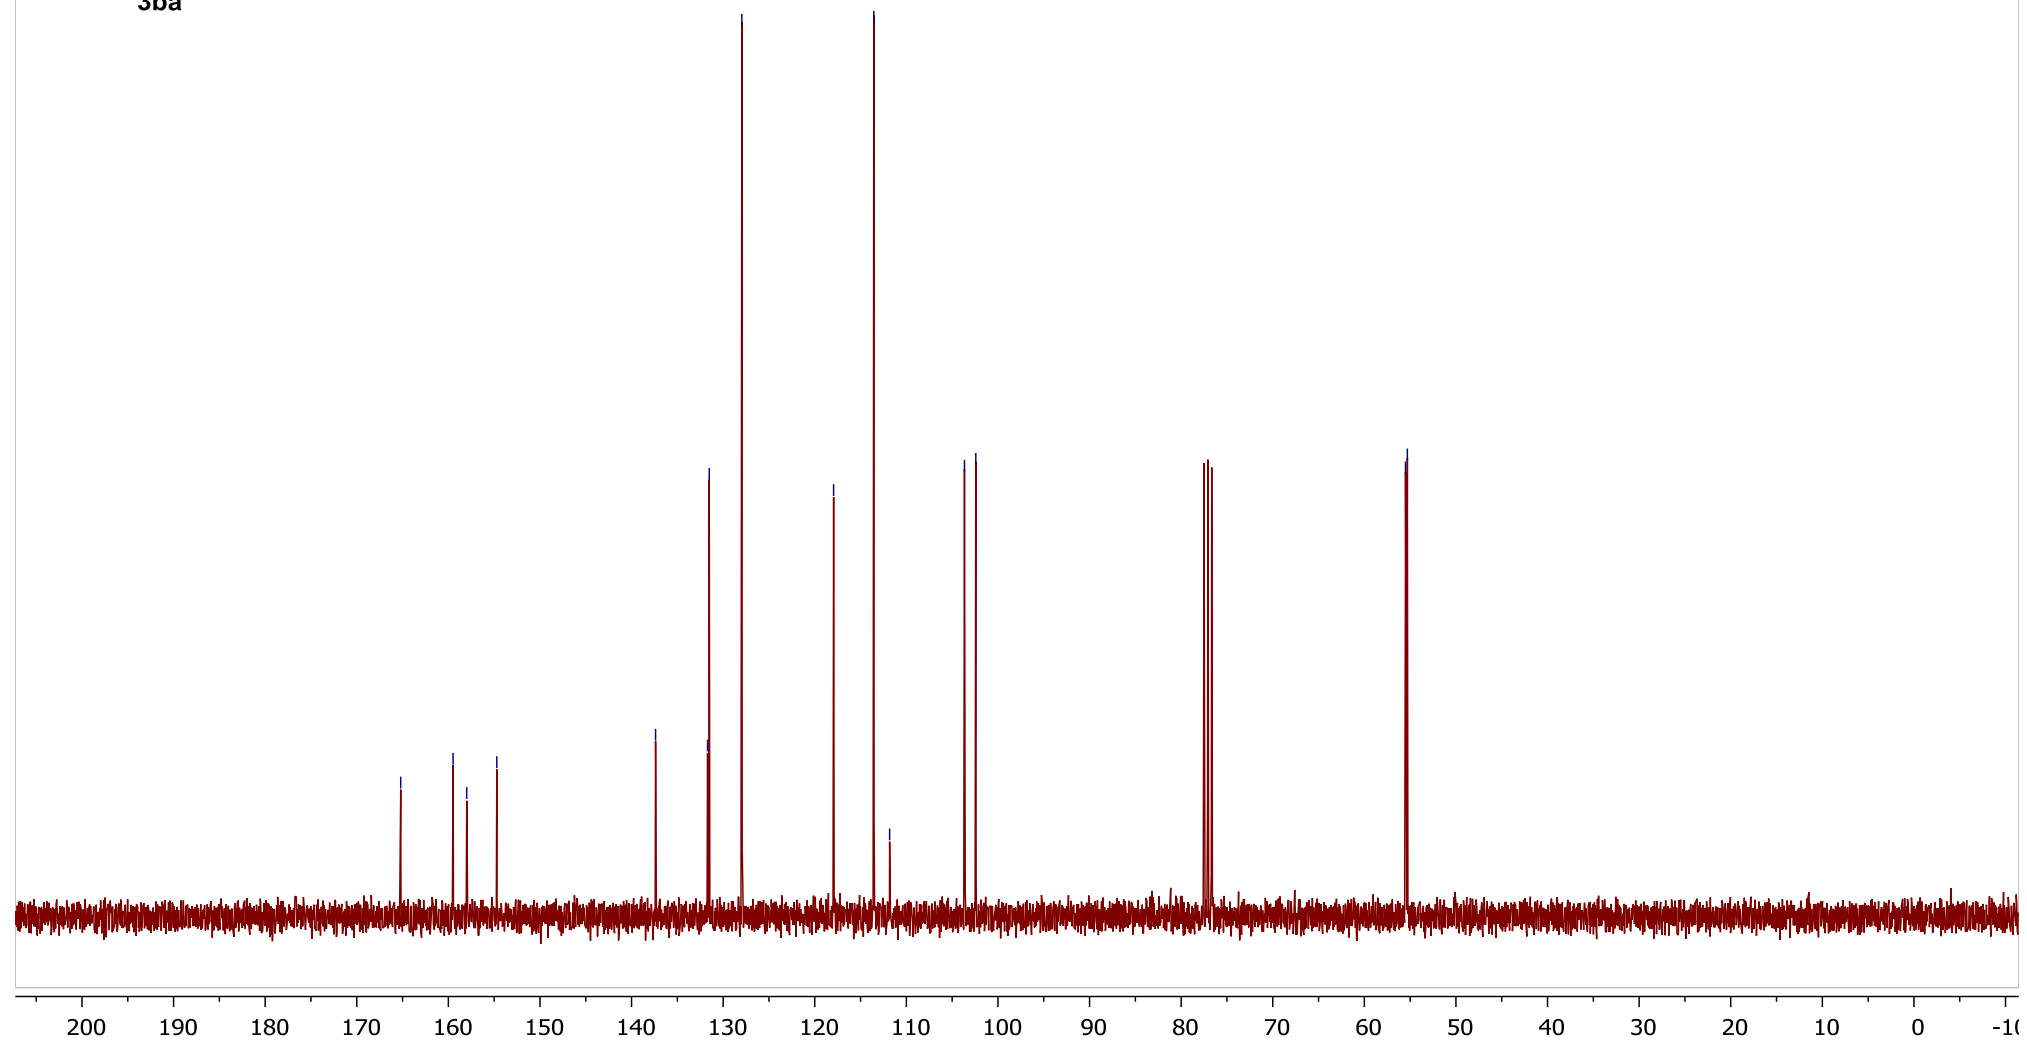

$^{13}\text{C}$  DEPT 135 (75 MHz,  $\text{CDCl}_3$ )

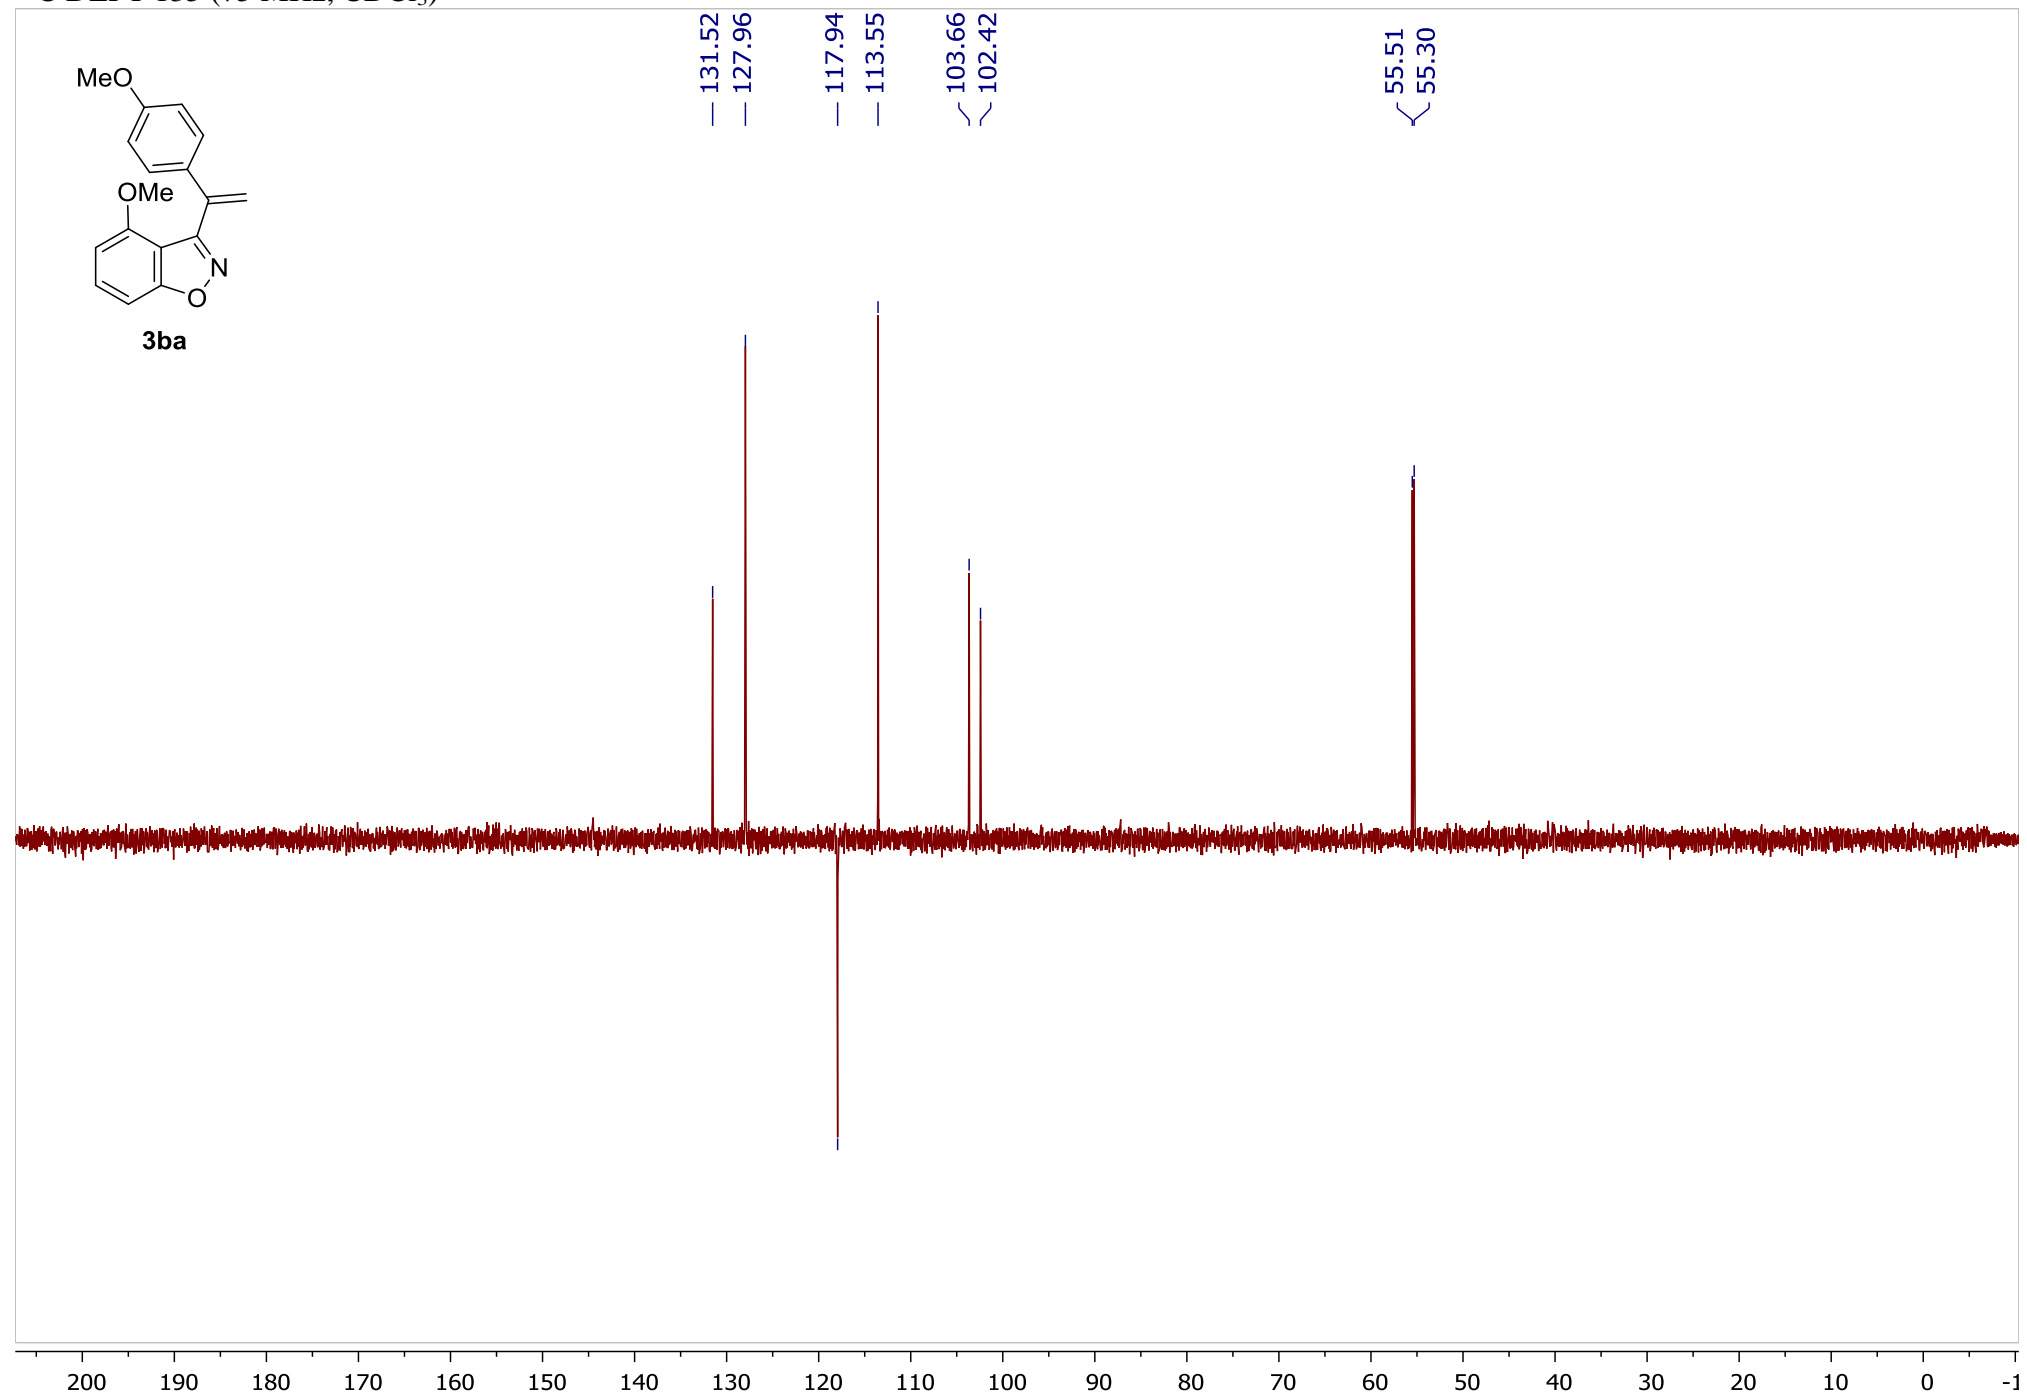

$^1\text{H}-^{13}\text{C}$  HSQC

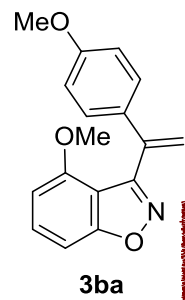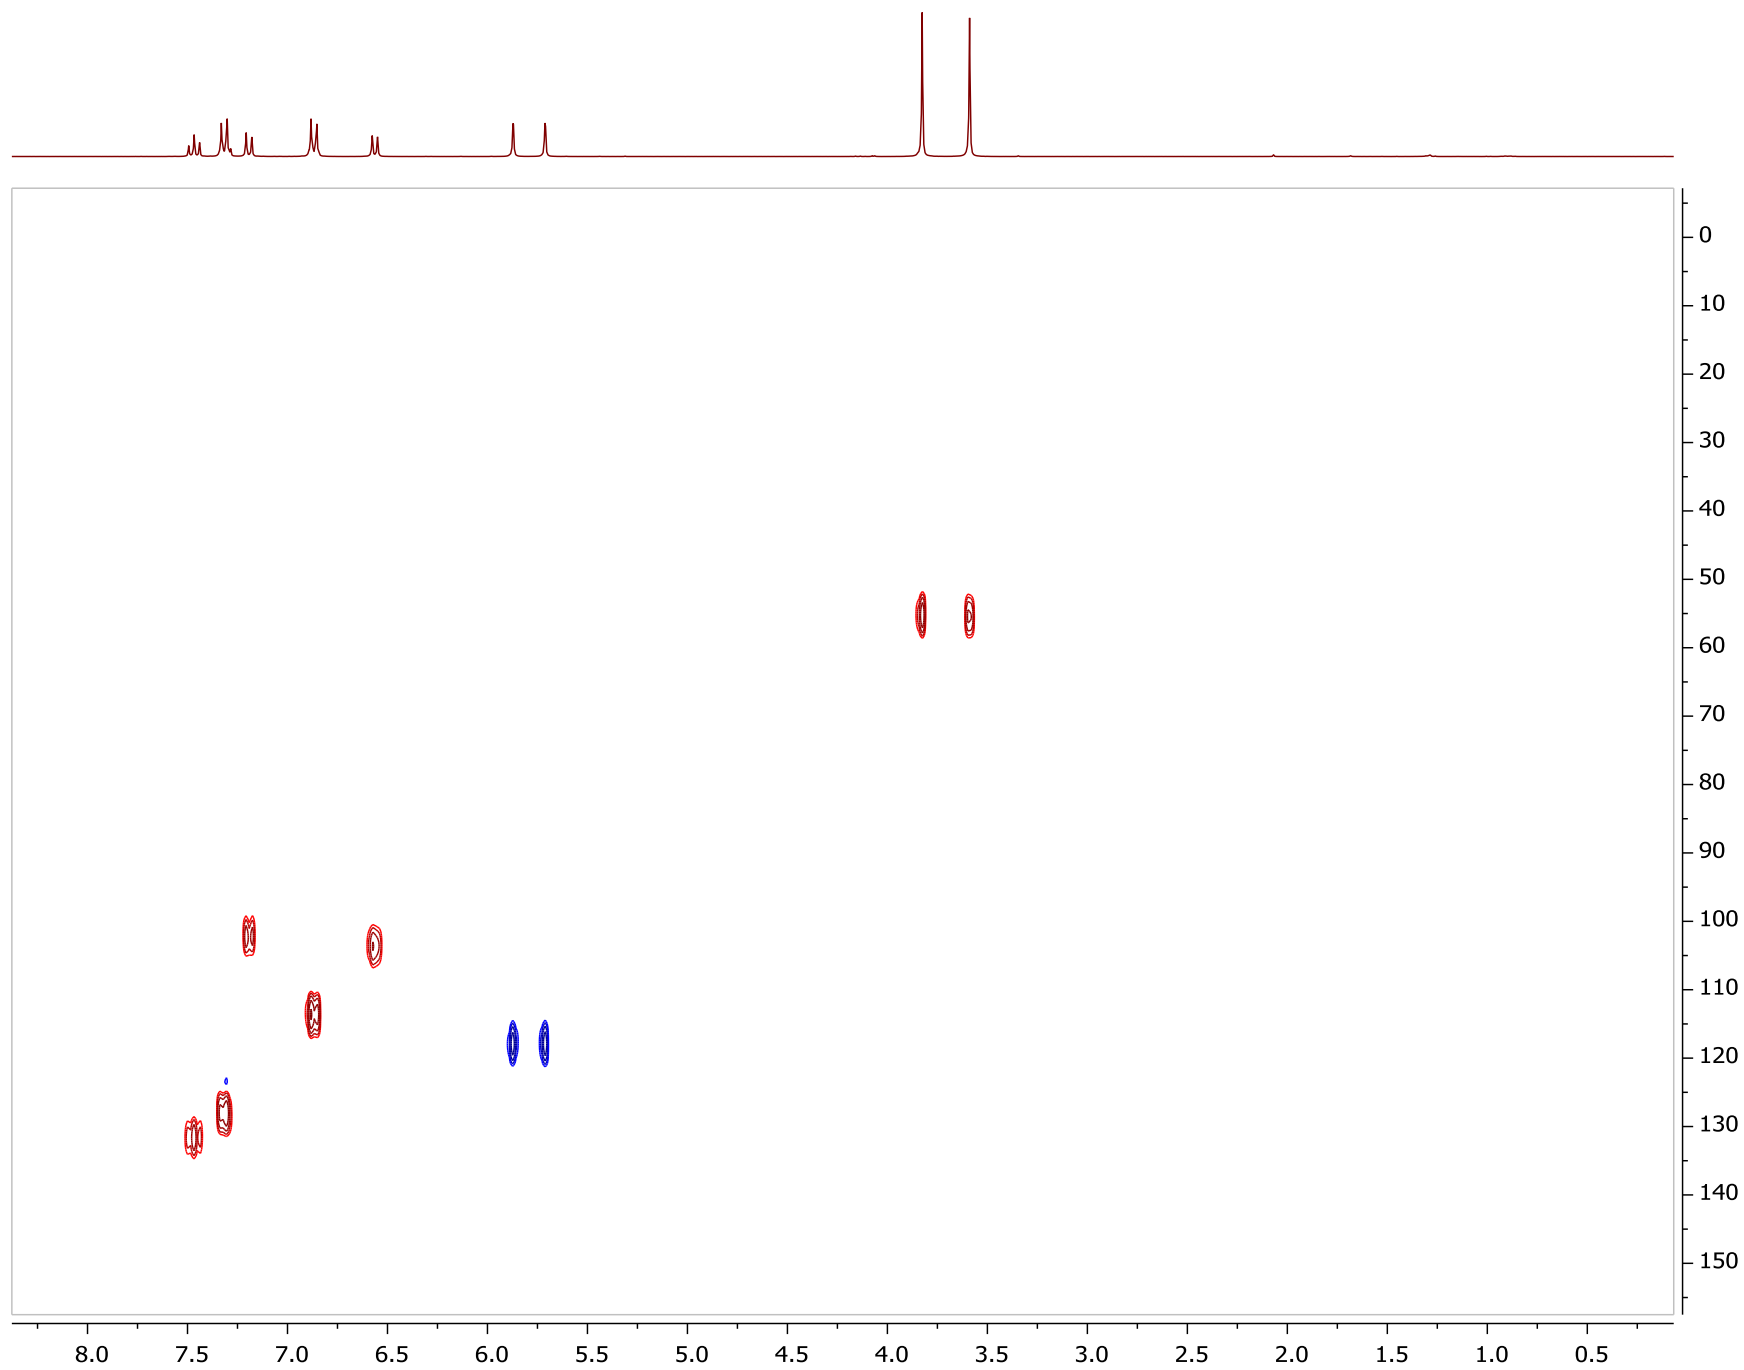

$^1\text{H}-^{13}\text{C}$  HMBC

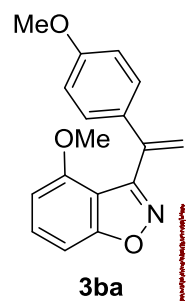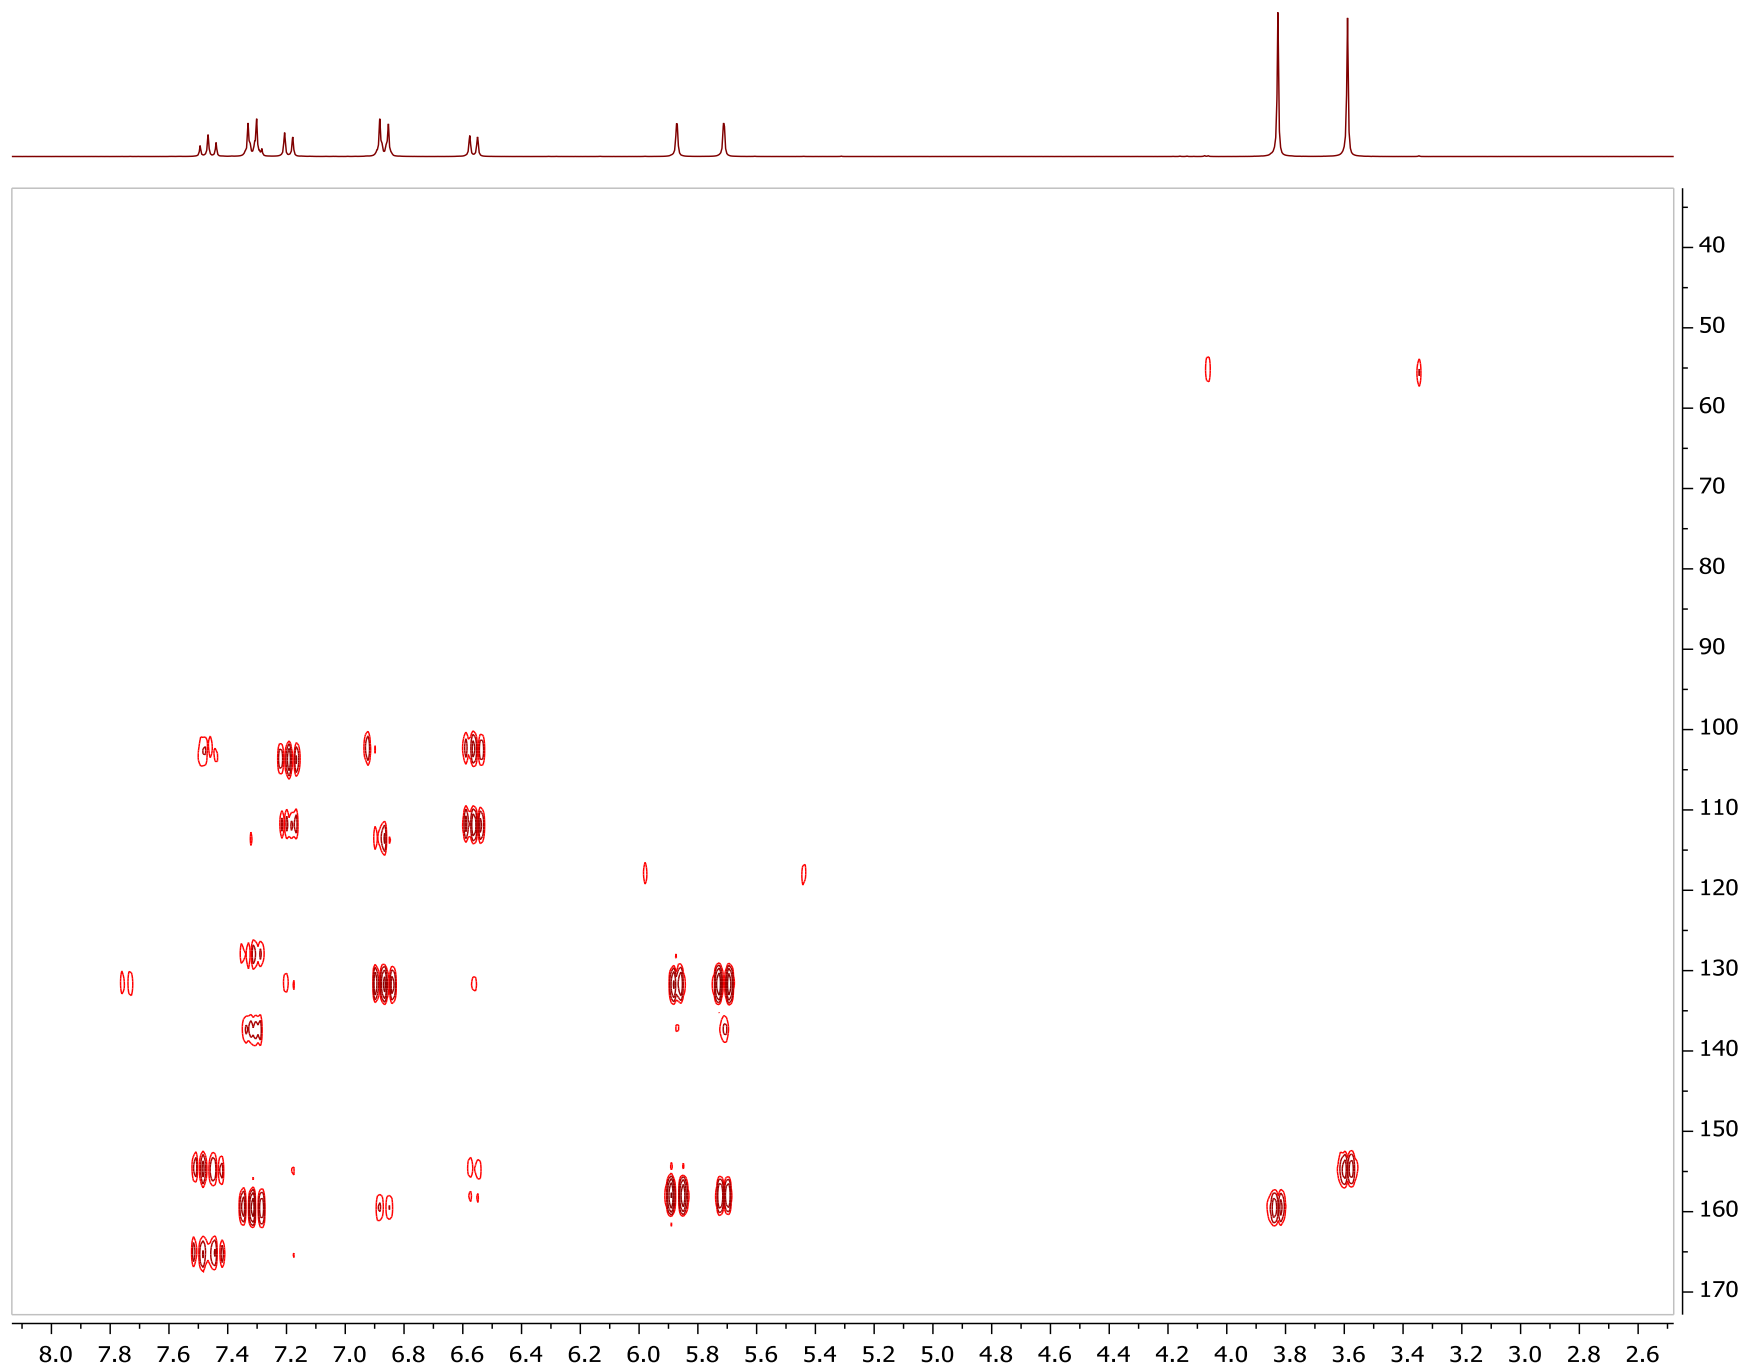

**4-Methoxy-3-(1-(4-methoxyphenyl)vinyl)benzo[d]isoxazole 3ca**

<sup>1</sup>H NMR (300 MHz, CDCl<sub>3</sub>)

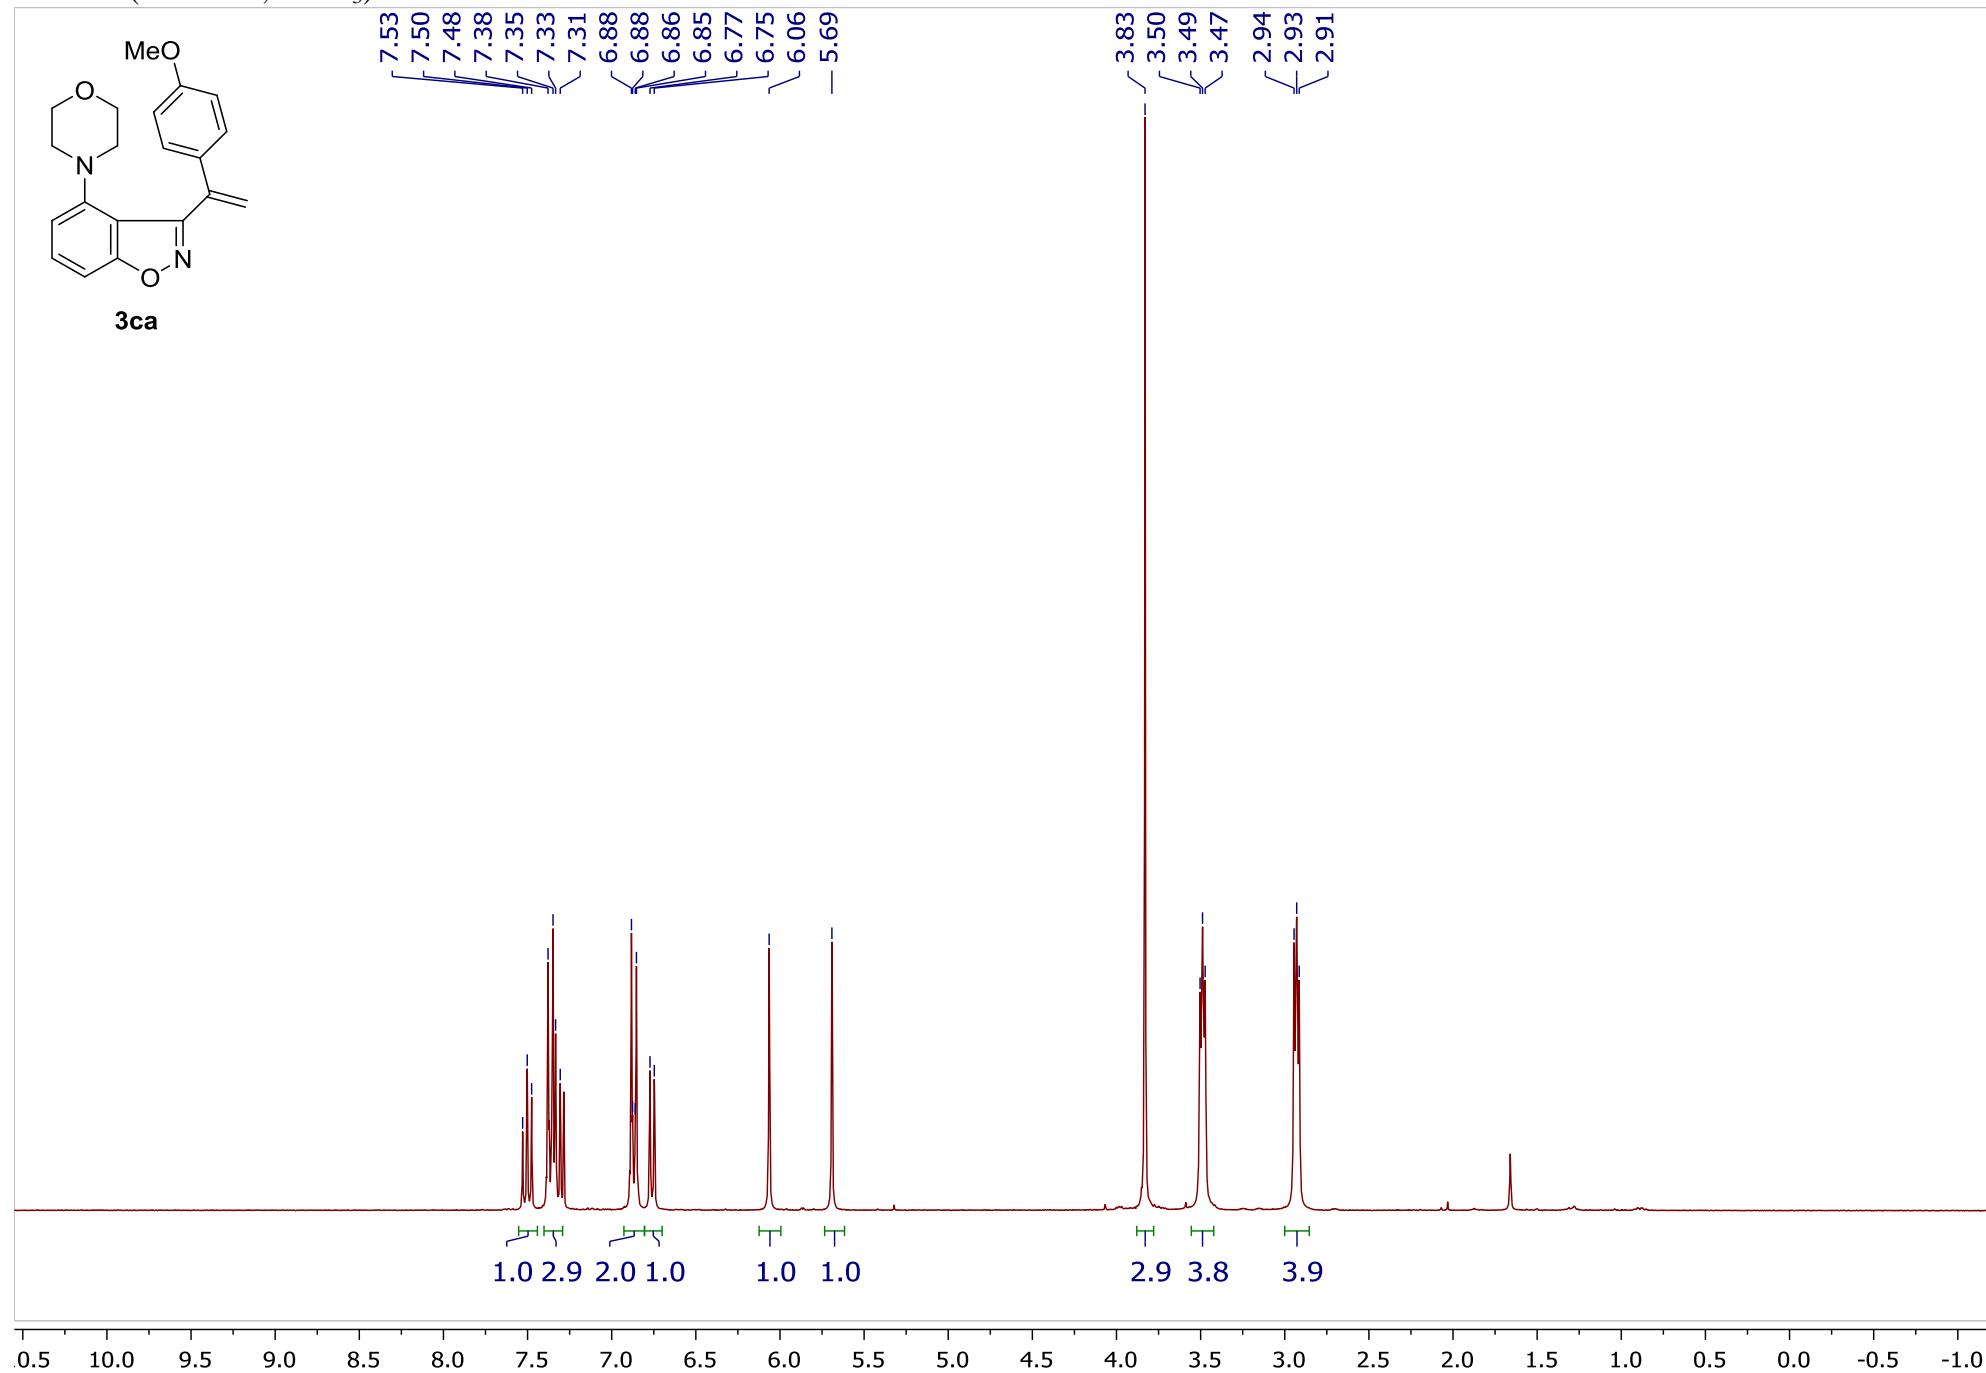

$^{13}\text{C}\{^1\text{H}\}$  NMR (75 MHz,  $\text{CDCl}_3$ )

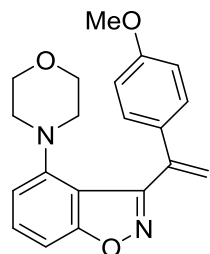

**3ca**

~ 165.39  
~ 159.94  
~ 157.68  
— 148.70  
~ 137.15  
~ 130.94  
~ 129.84  
~ 127.69  
~ 116.64  
~ 114.87  
~ 113.69  
~ 111.47  
— 104.49  
— 66.25  
~ 55.35  
~ 52.67

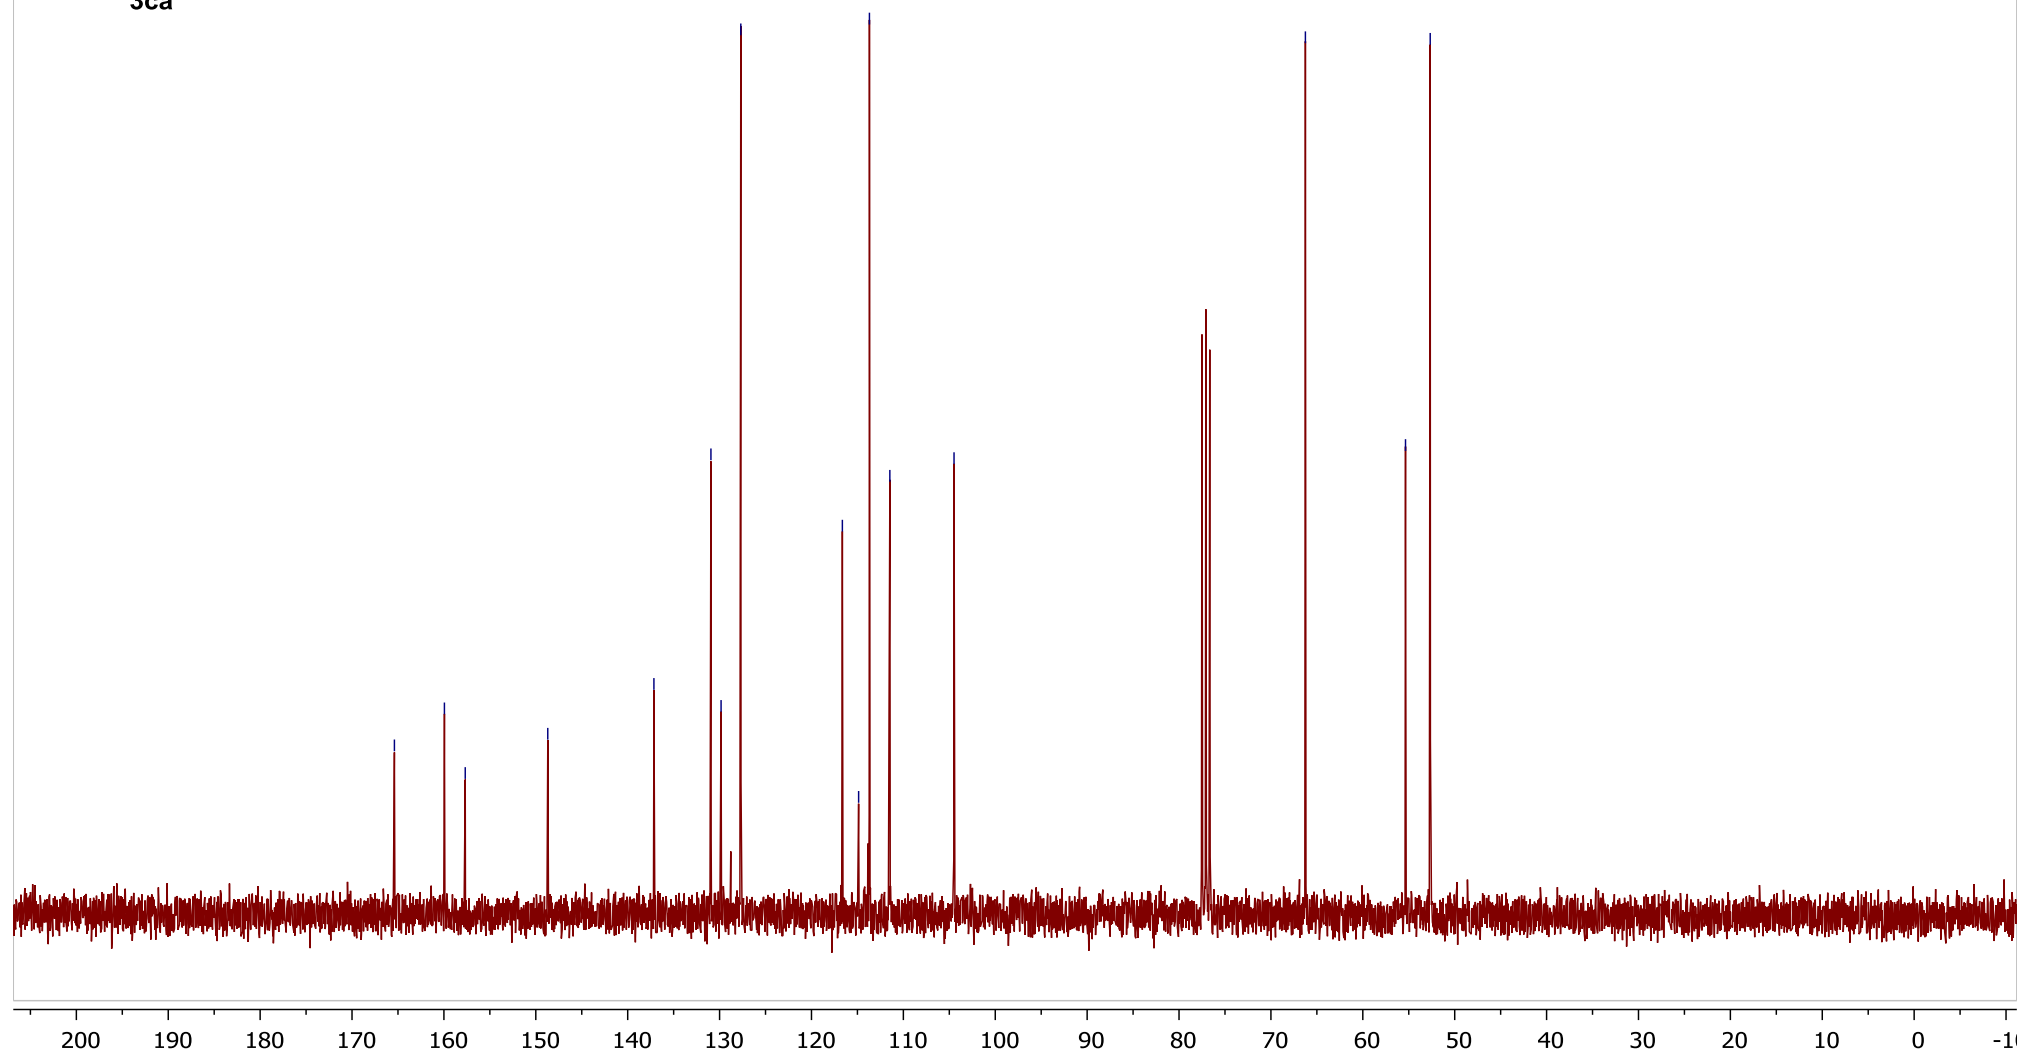

<sup>13</sup>C DEPT 135 (75 MHz, CDCl<sub>3</sub>)

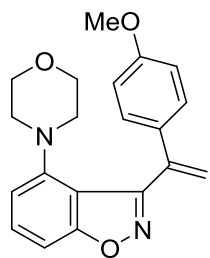

**3ca**

— 130.94  
— 127.69  
— 116.64  
— 113.69  
— 111.47  
— 104.49  
  
— 66.25  
— 55.35  
— 52.67

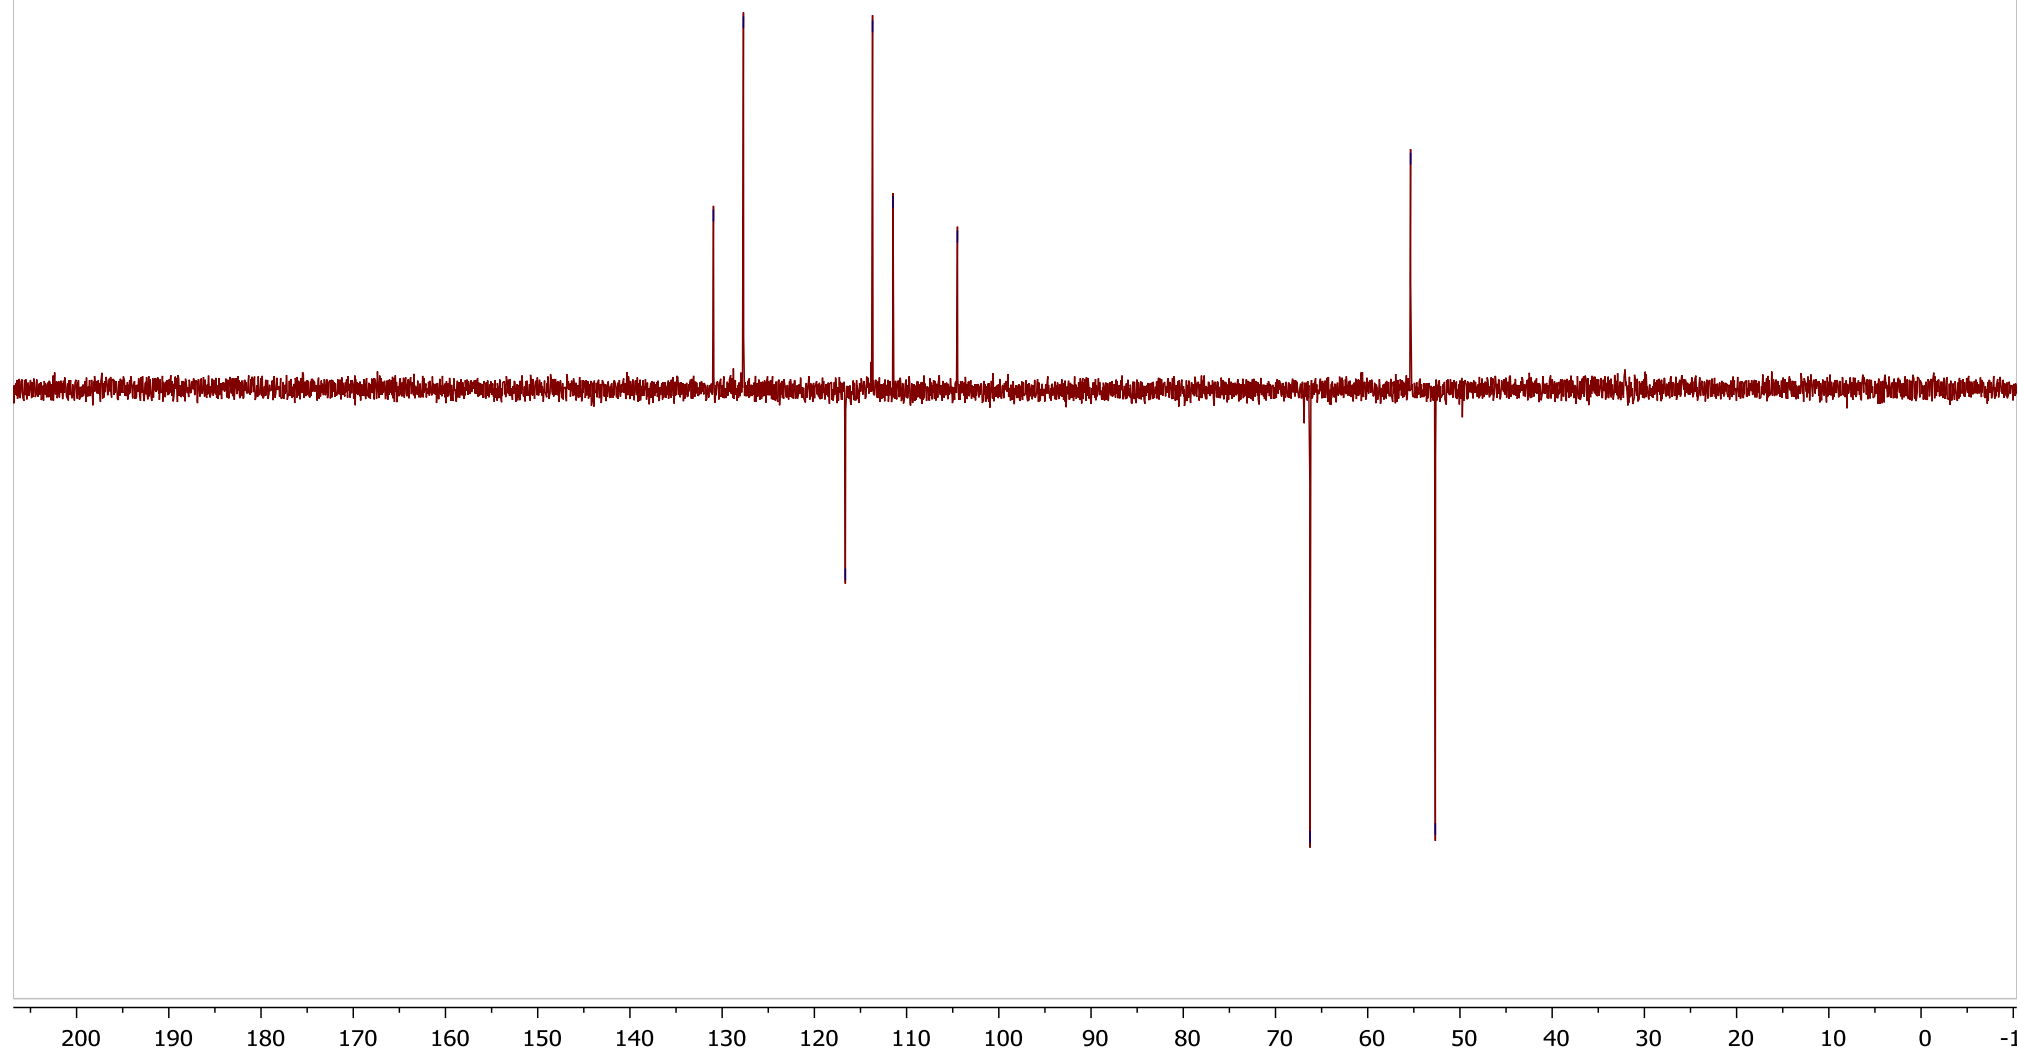

$^1\text{H}$ - $^1\text{H}$  COSY

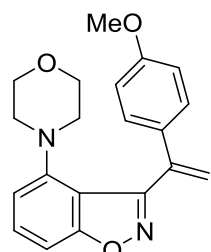

3ca

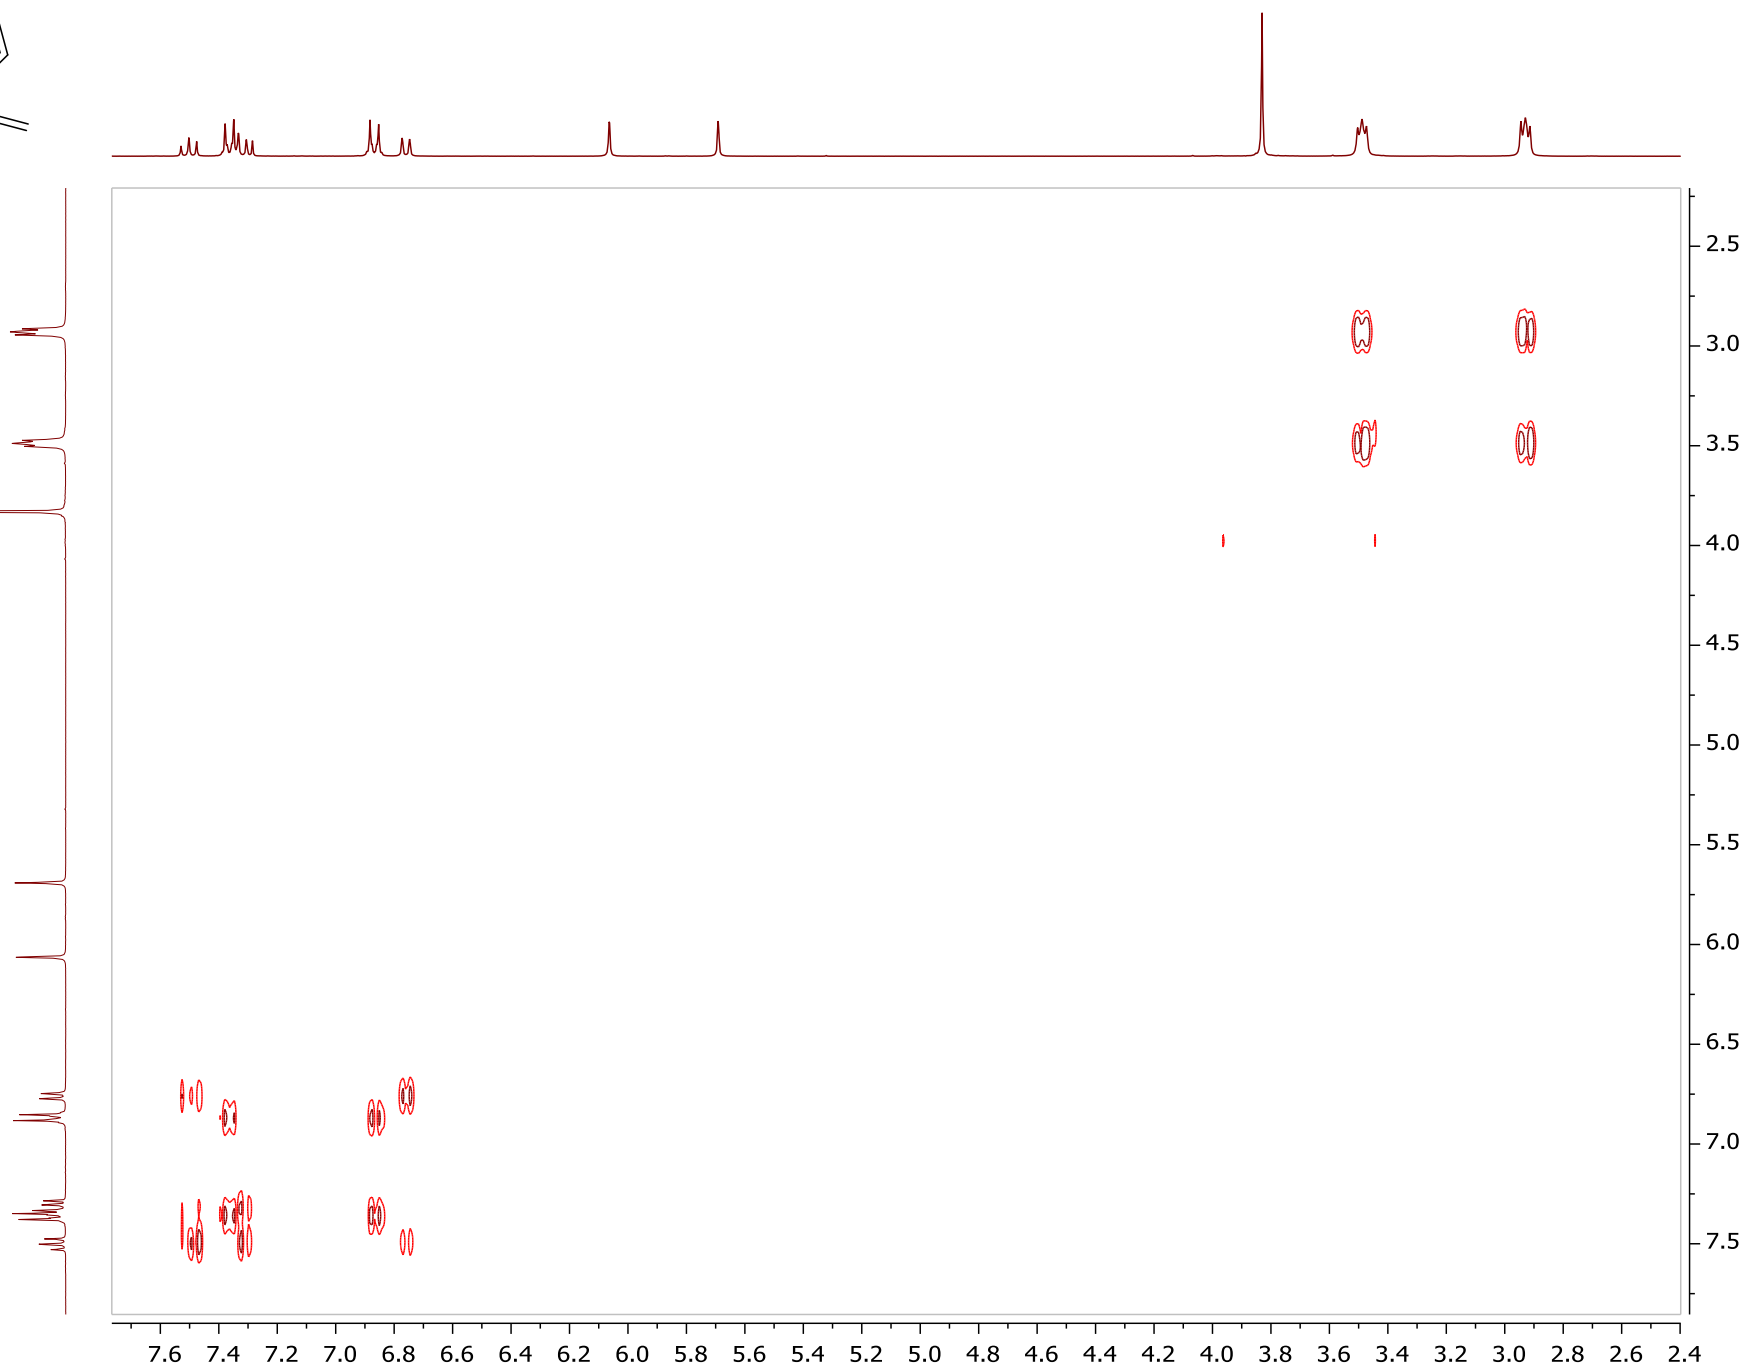



$^1\text{H}-^{13}\text{C}$  HSQC

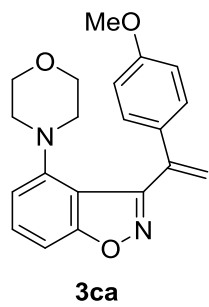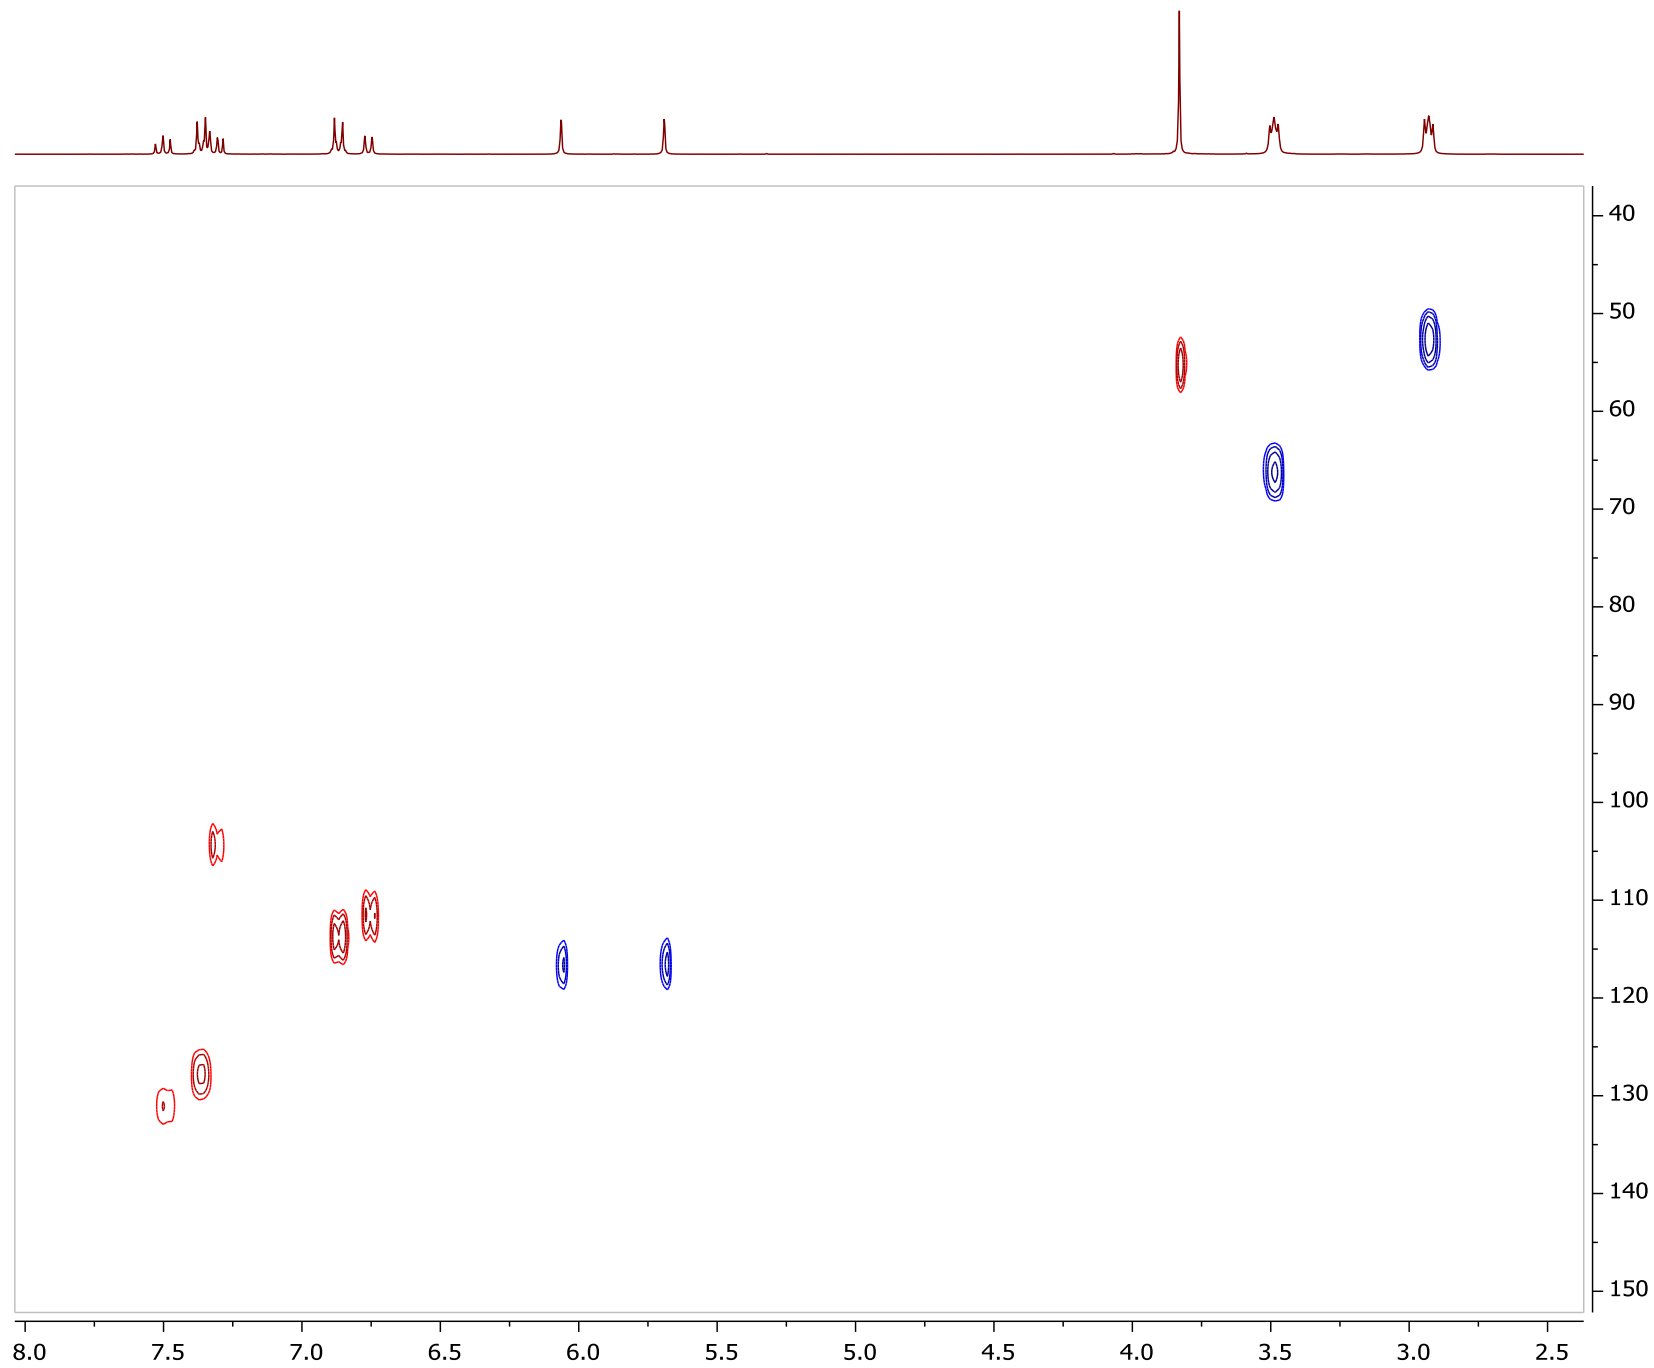

$^1\text{H}$ - $^{13}\text{C}$  HMBC

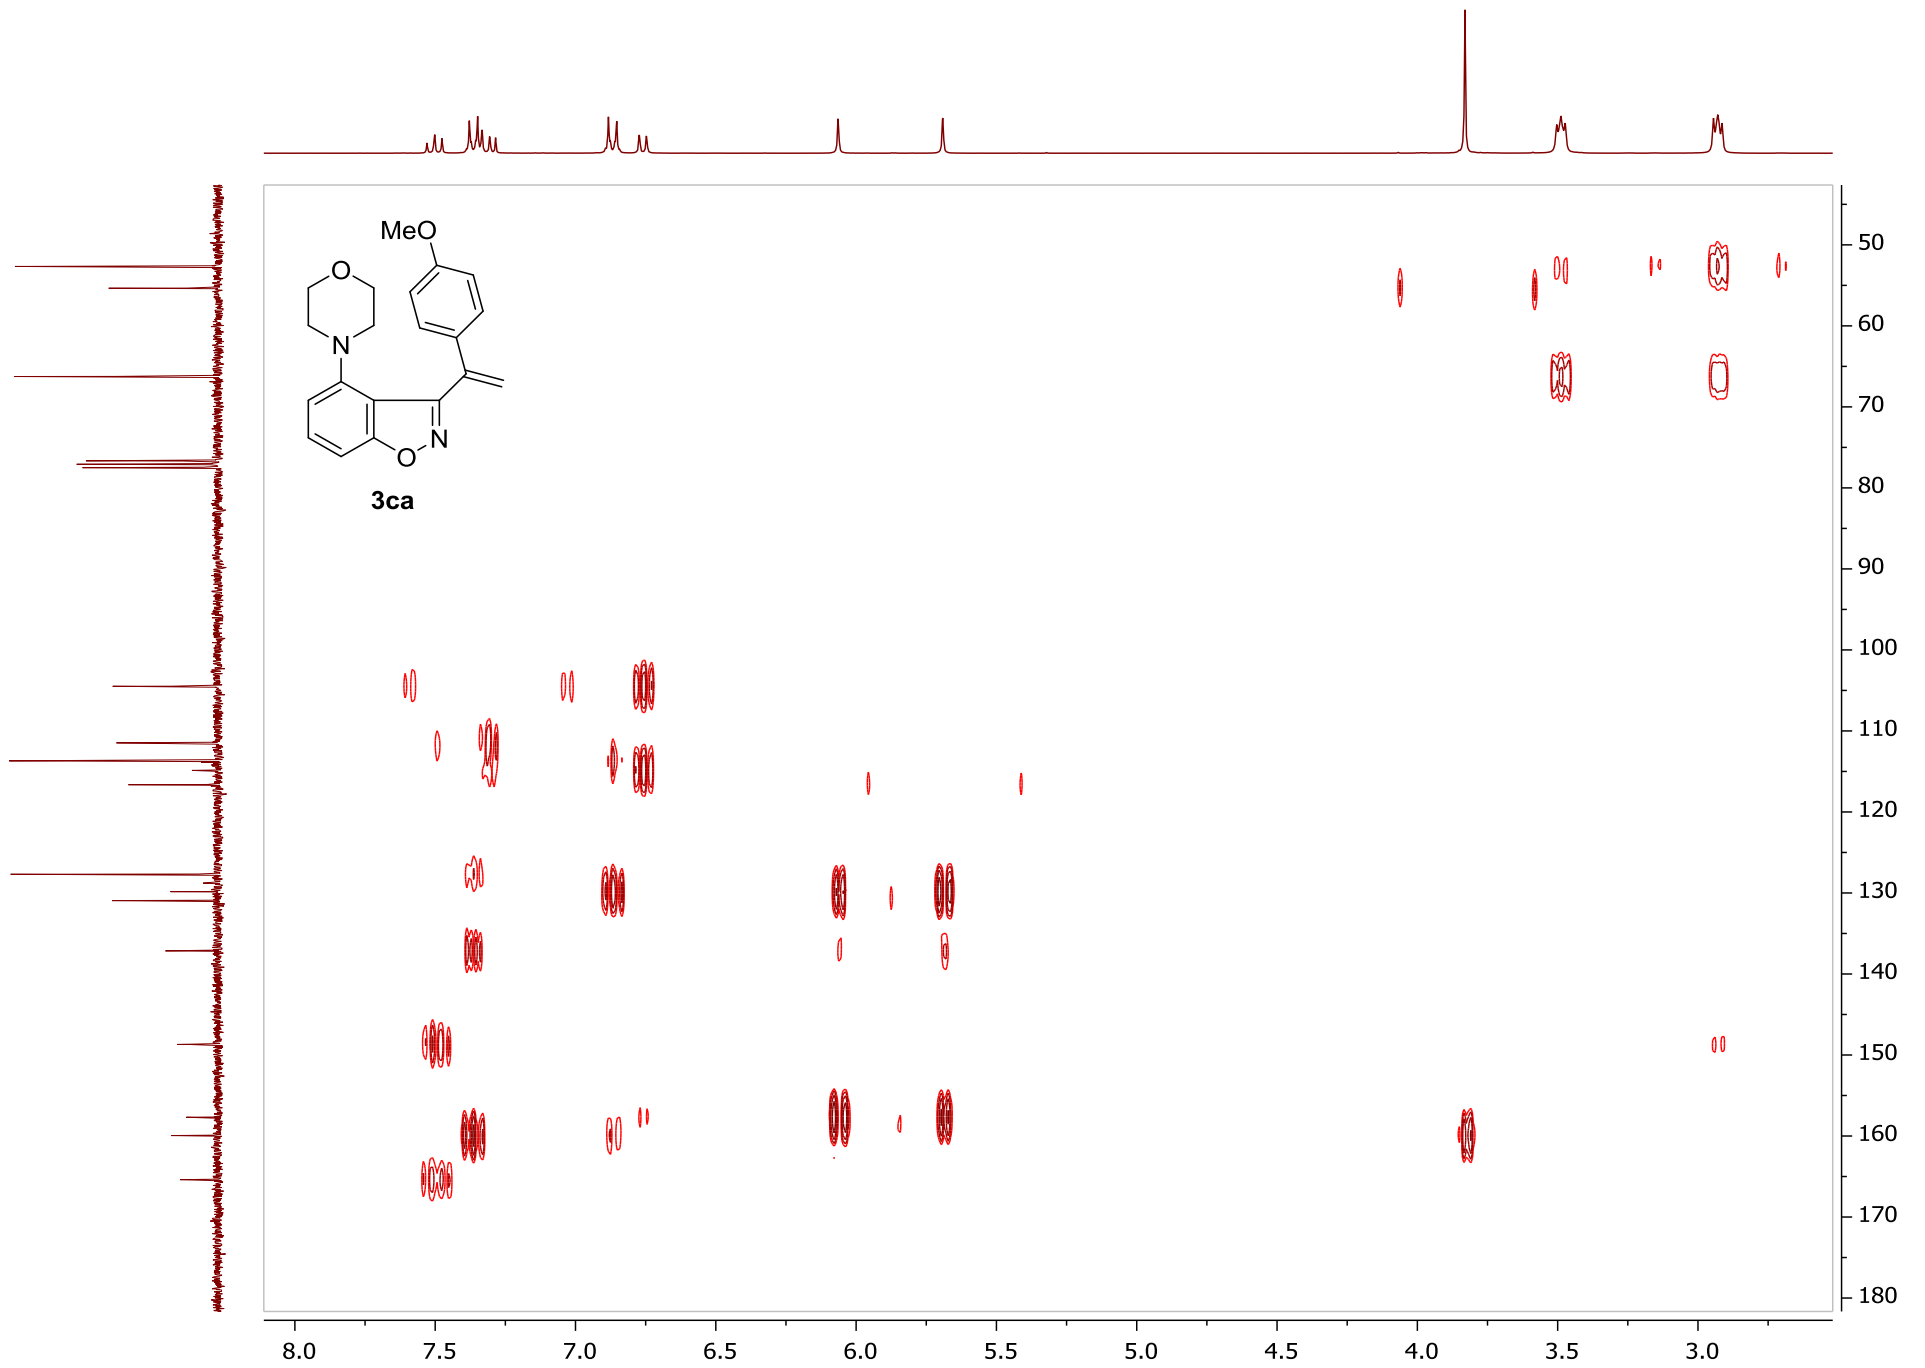

**4-Methoxy-3-(1-(4-methoxyphenyl)vinyl)benzo[d]isoxazole 3ca and 3-(1-(4-methoxyphenyl)vinyl)-7-morpholinobenzo[d]isoxazole 3'ca**

<sup>1</sup>H NMR (300 MHz, CDCl<sub>3</sub>) 3ca : 3'ca = 1:1.8.

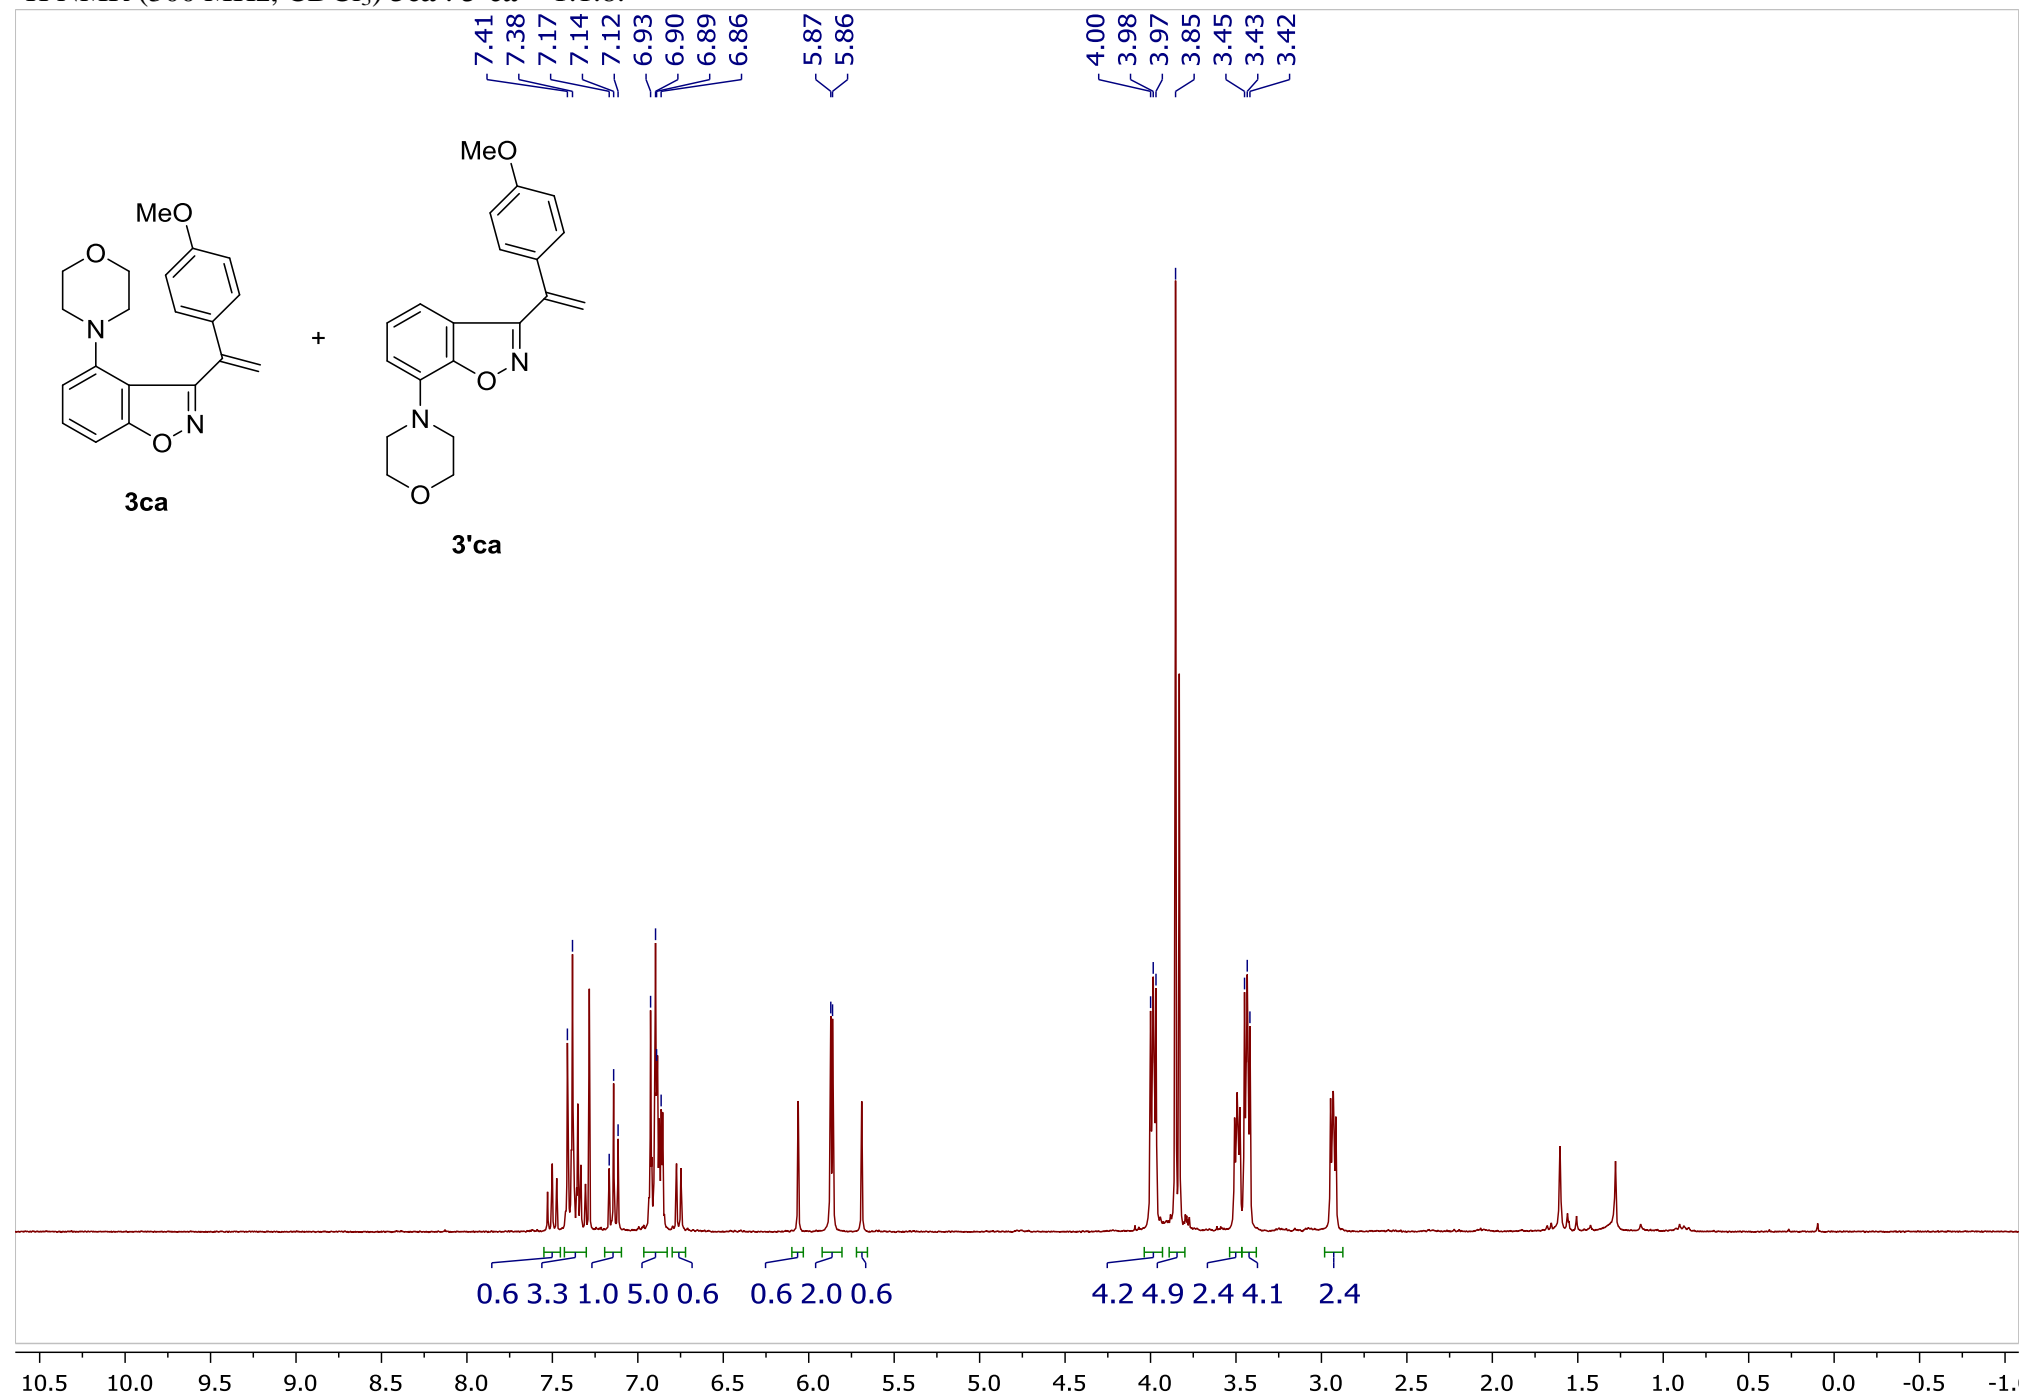

$^{13}\text{C}\{^1\text{H}\}$  NMR (75 MHz,  $\text{CDCl}_3$ )

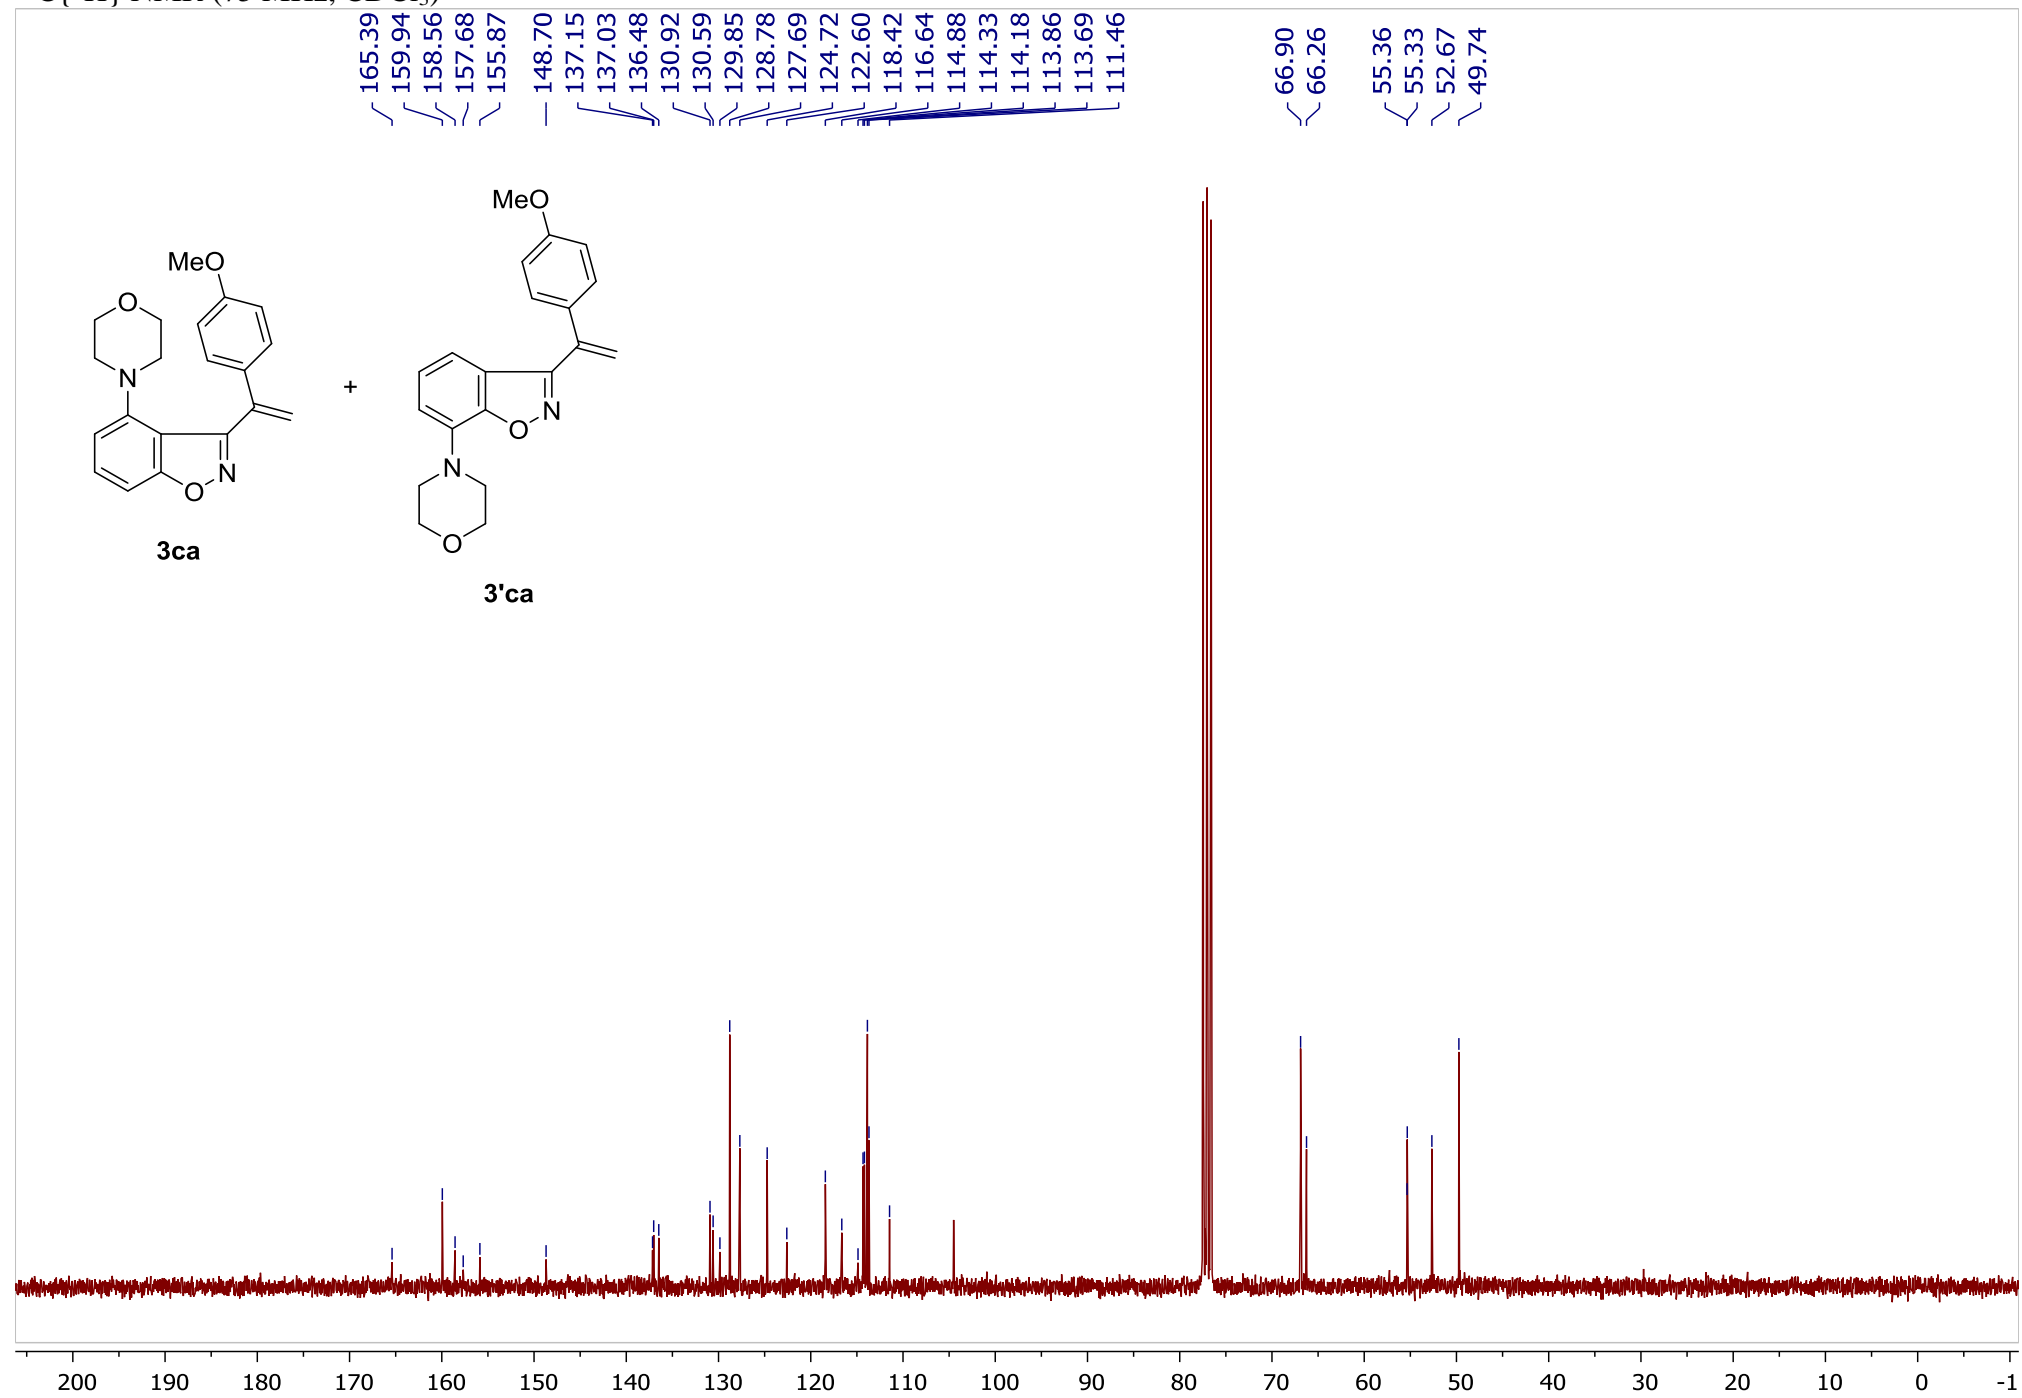

<sup>13</sup>C DEPT 135 (75 MHz, CDCl<sub>3</sub>)

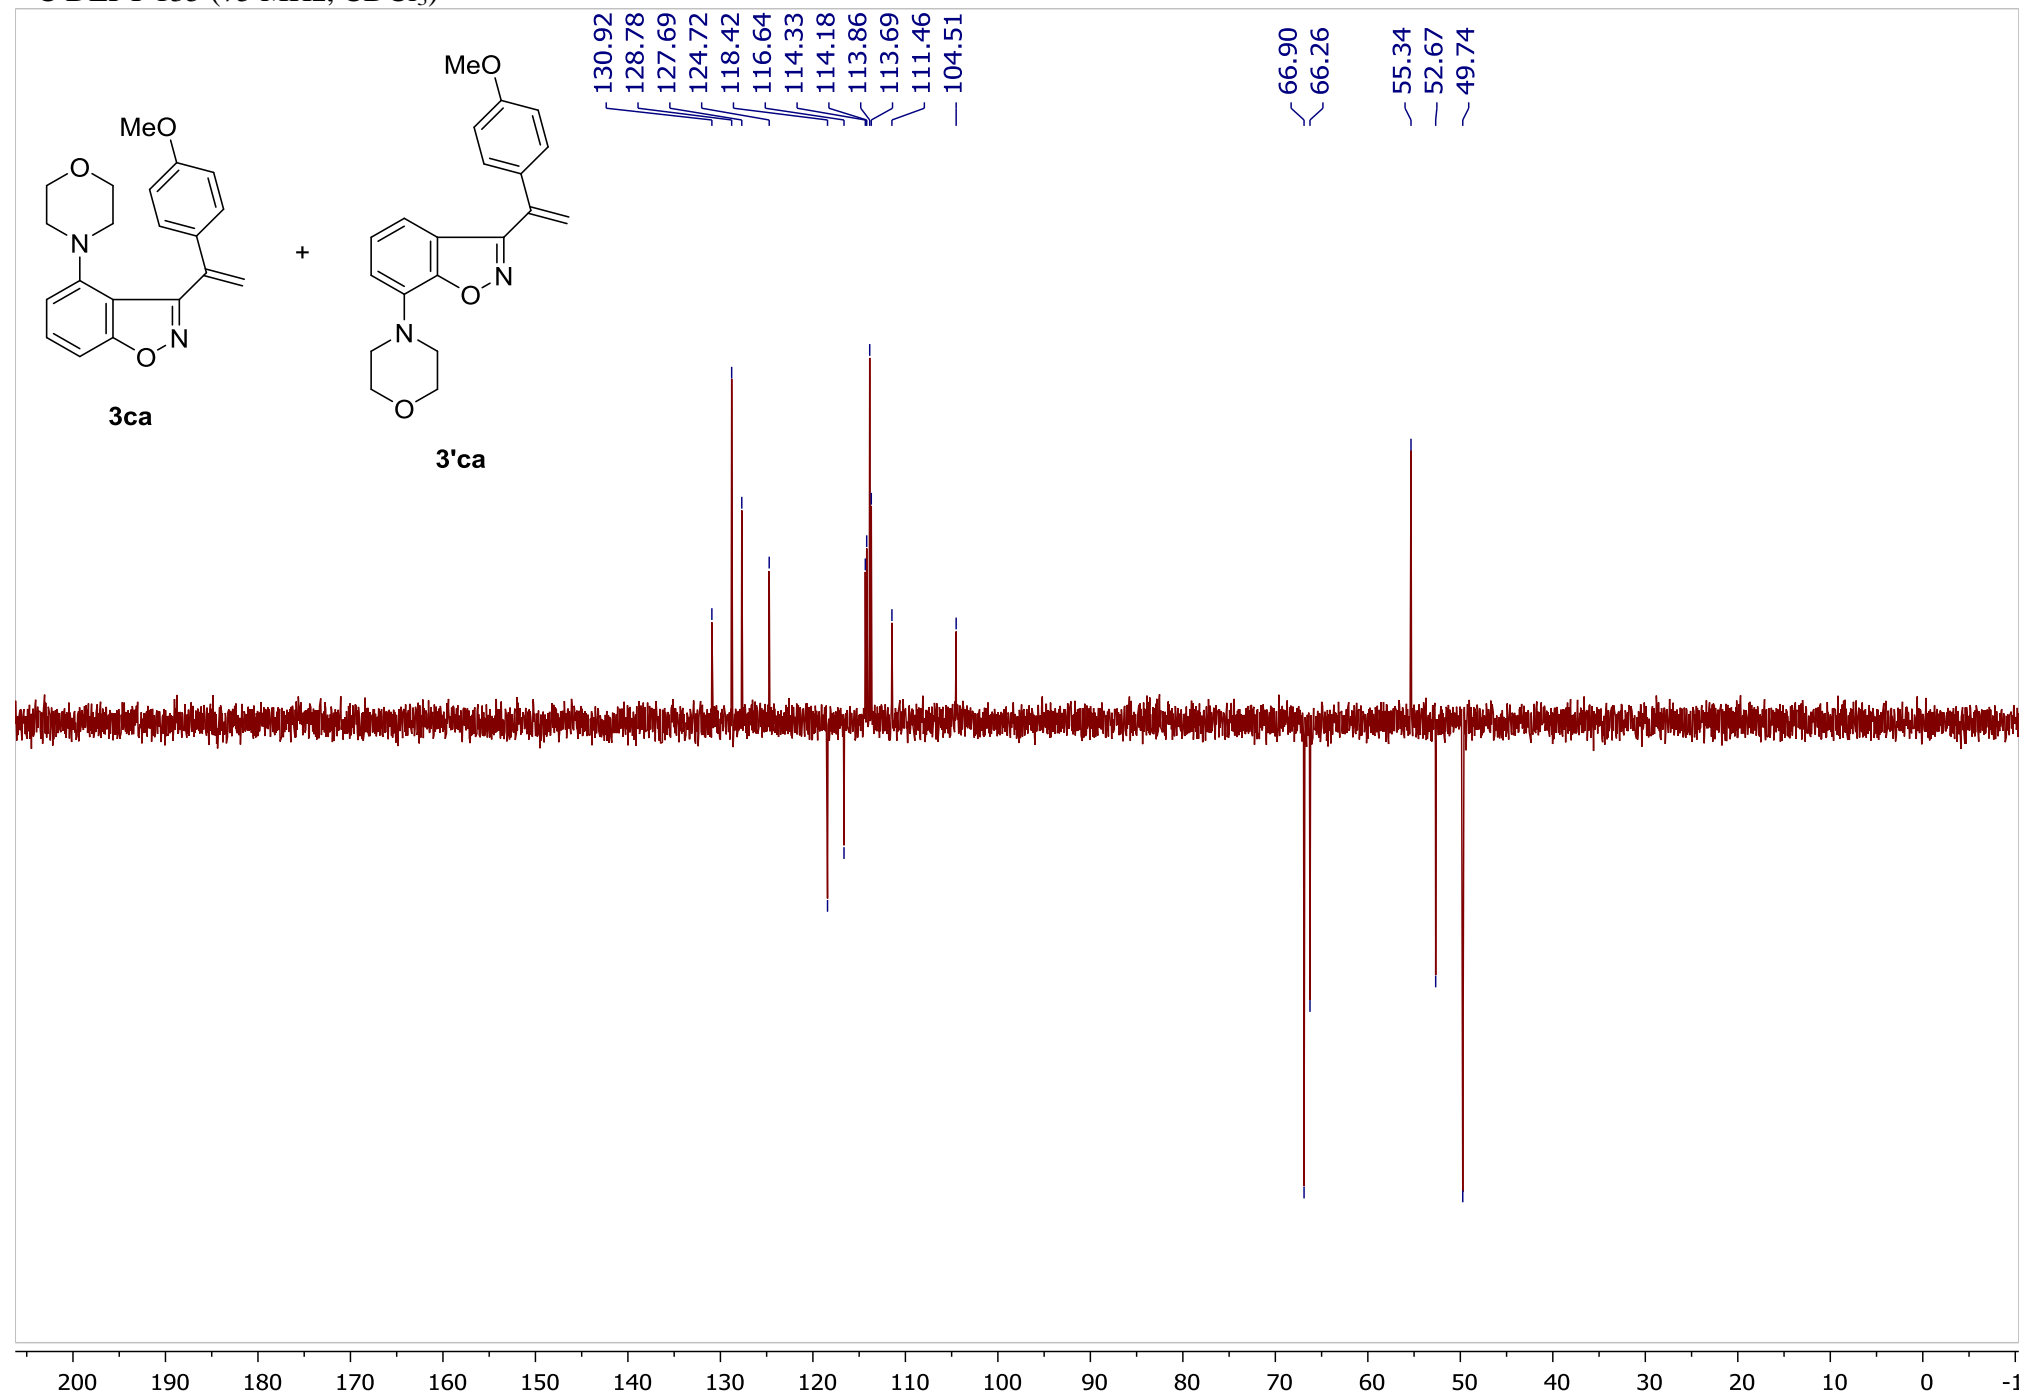

$^1\text{H}$ - $^1\text{H}$  COSY

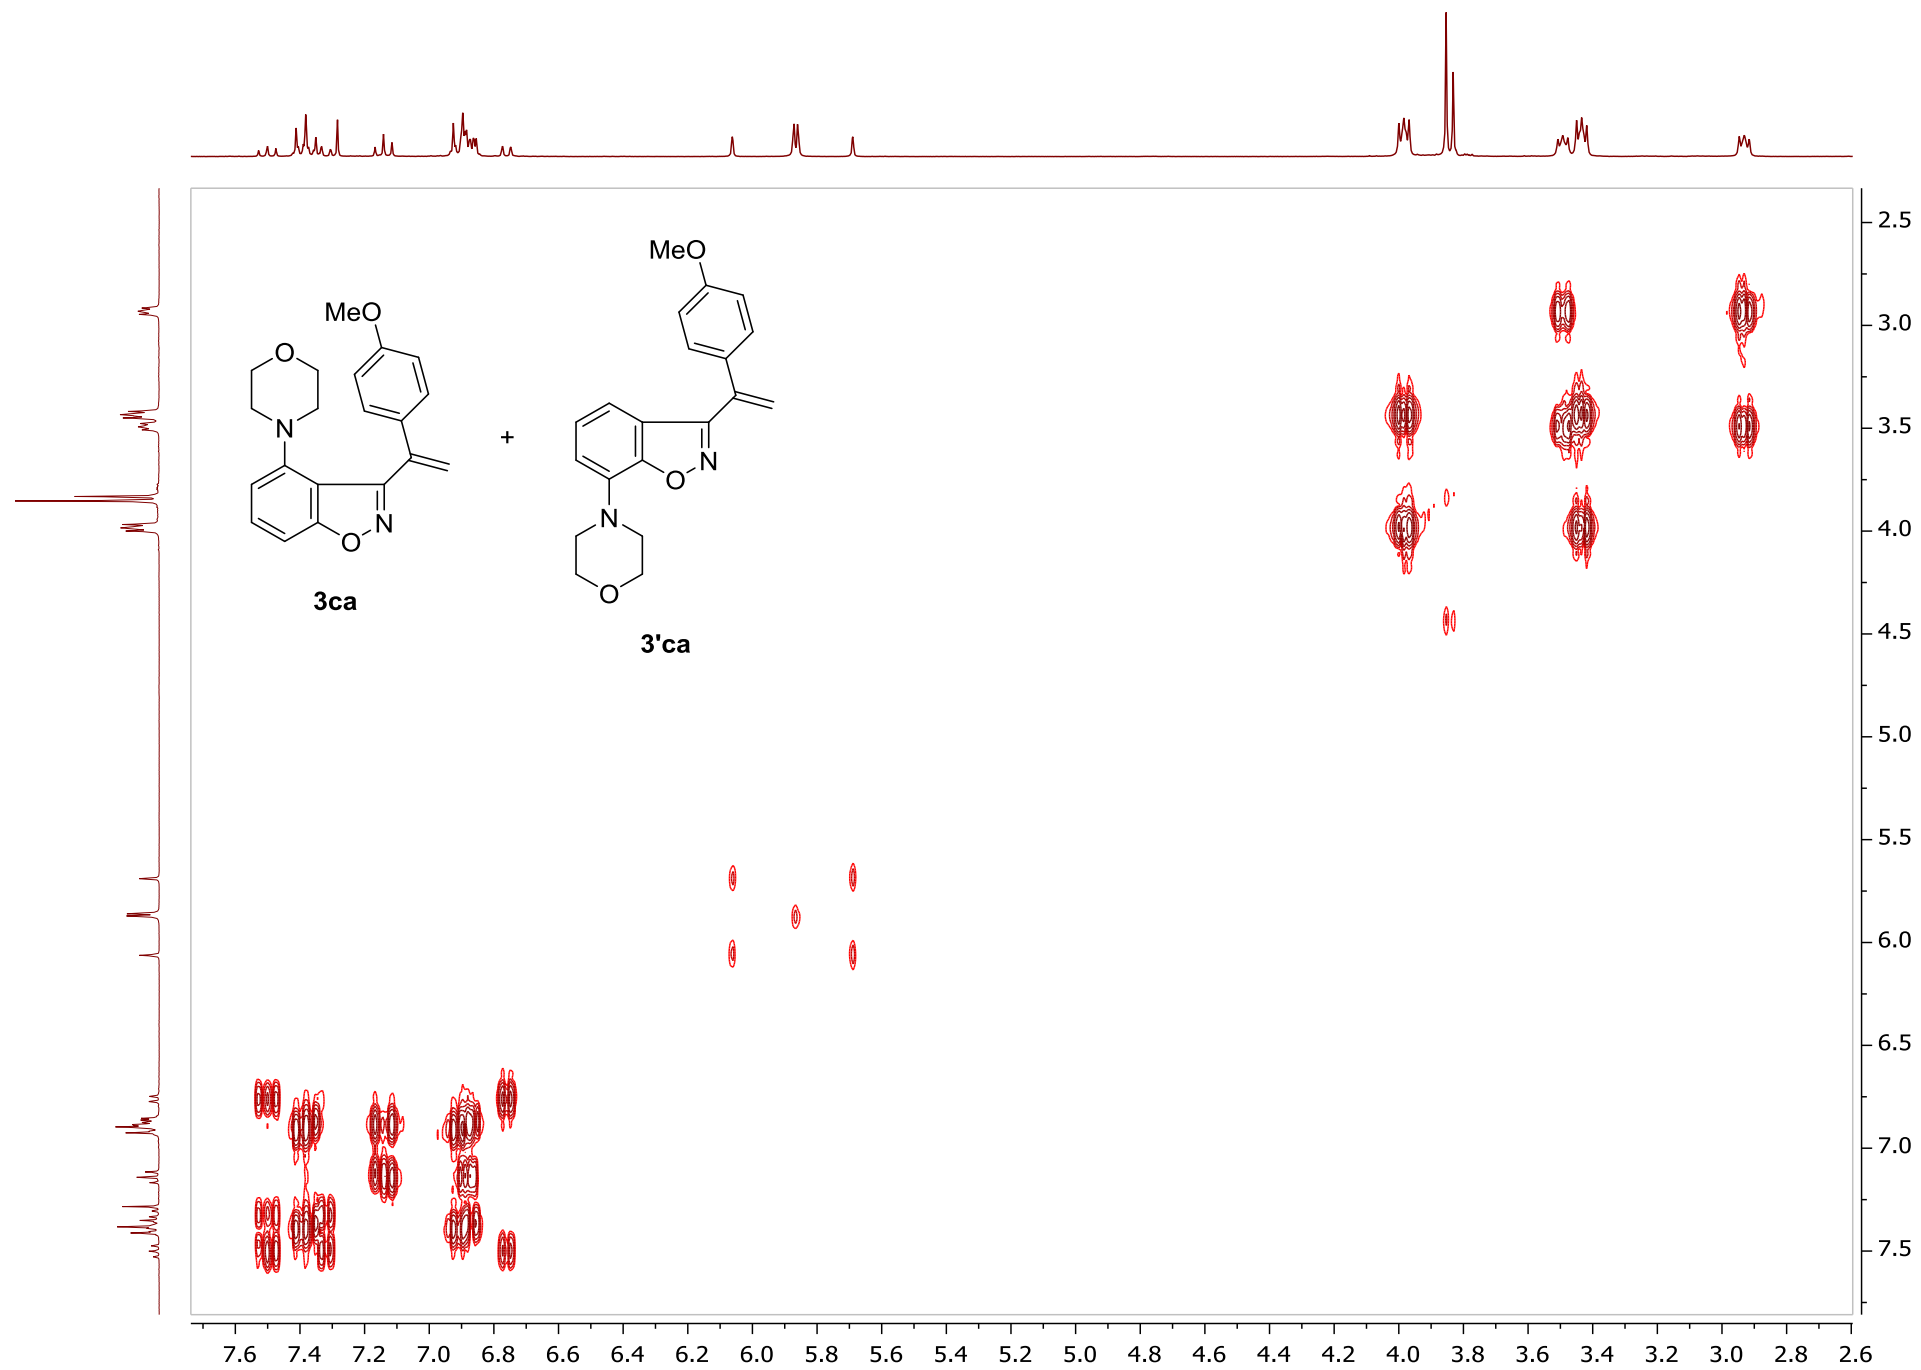

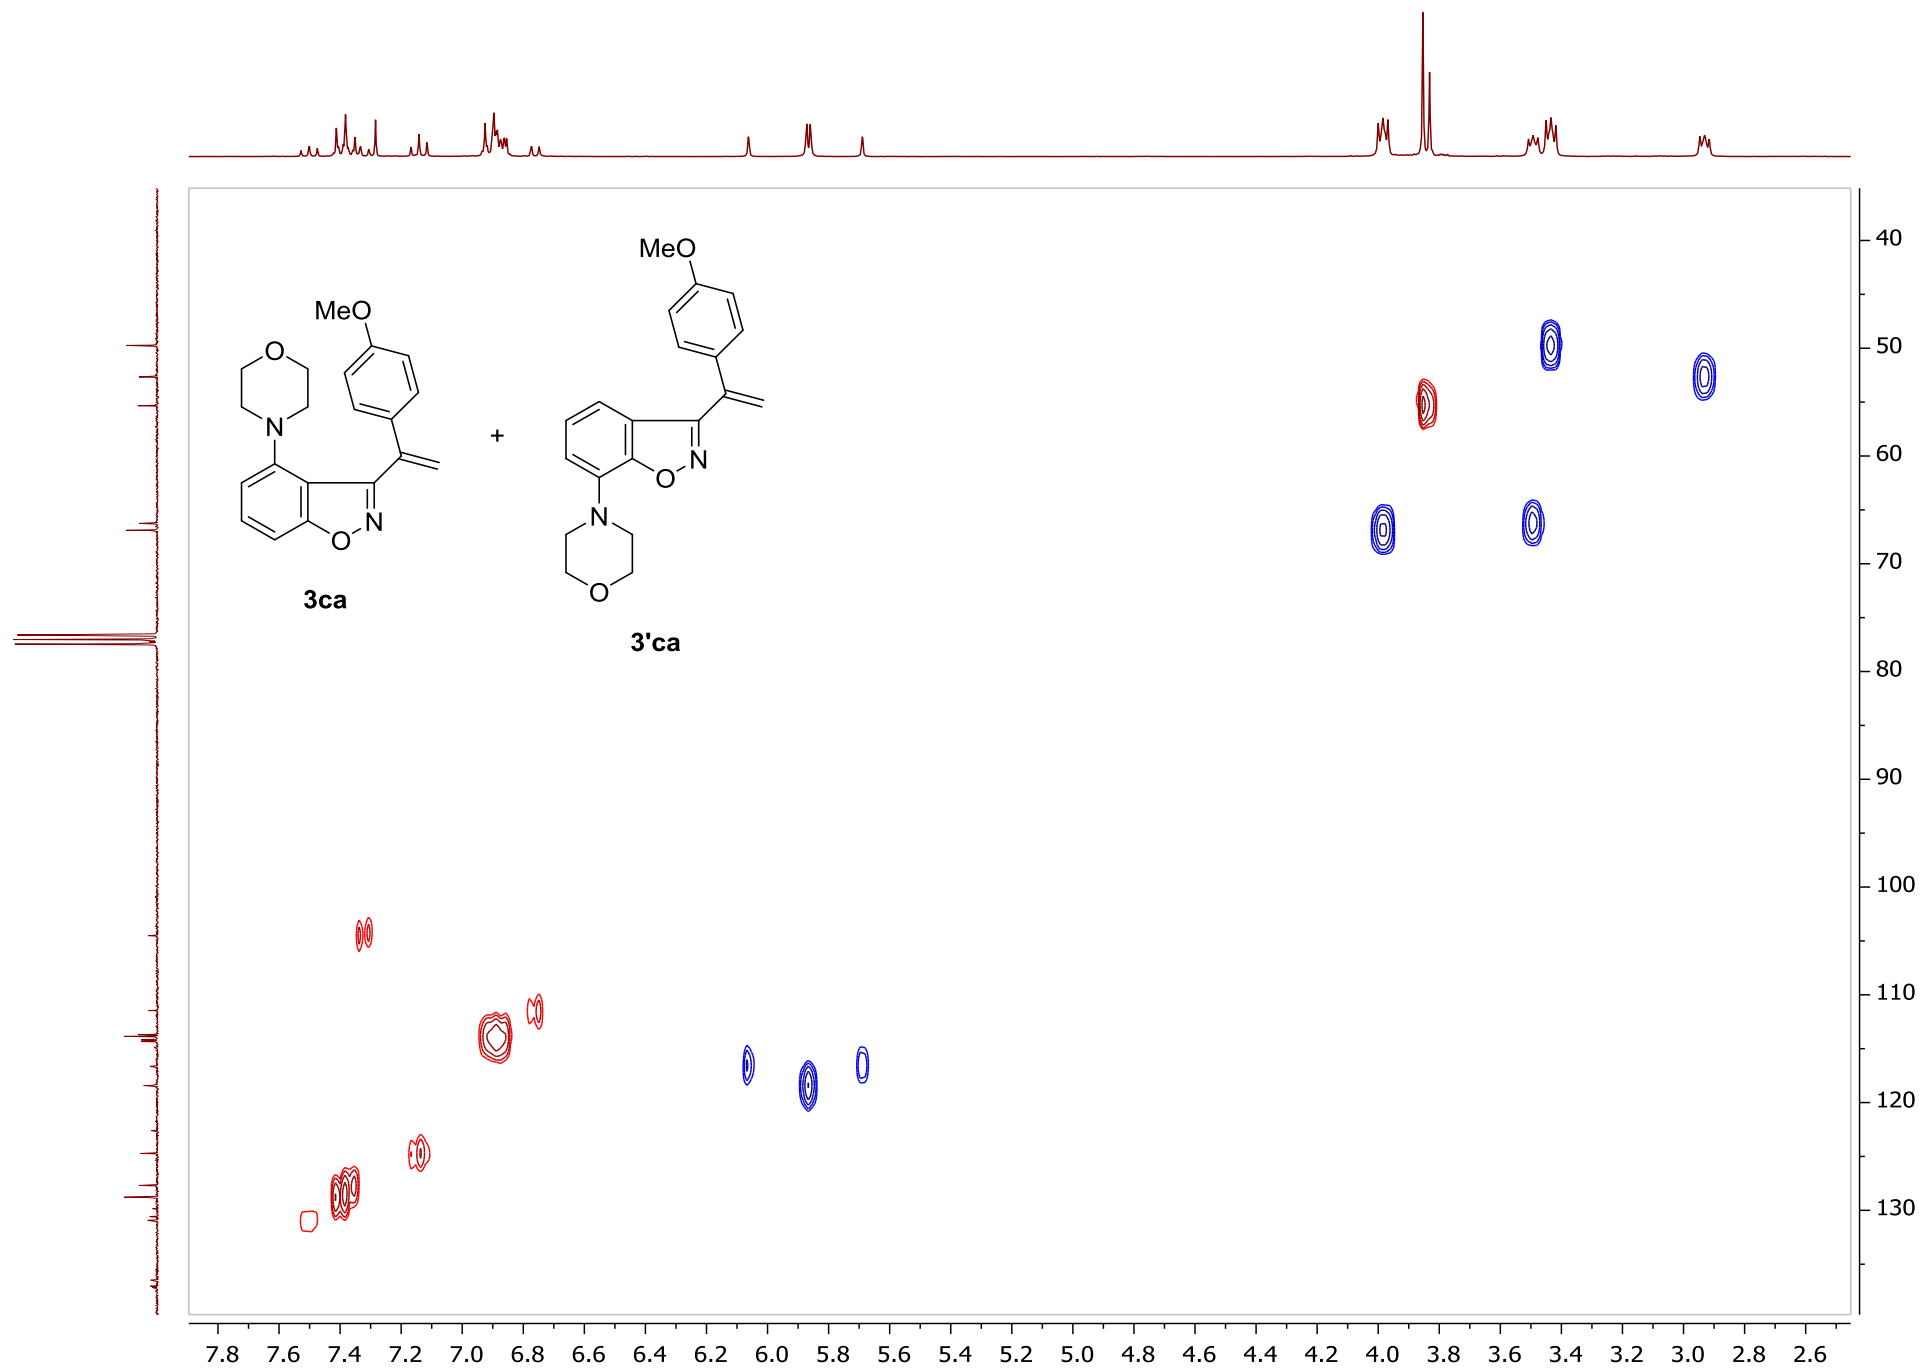

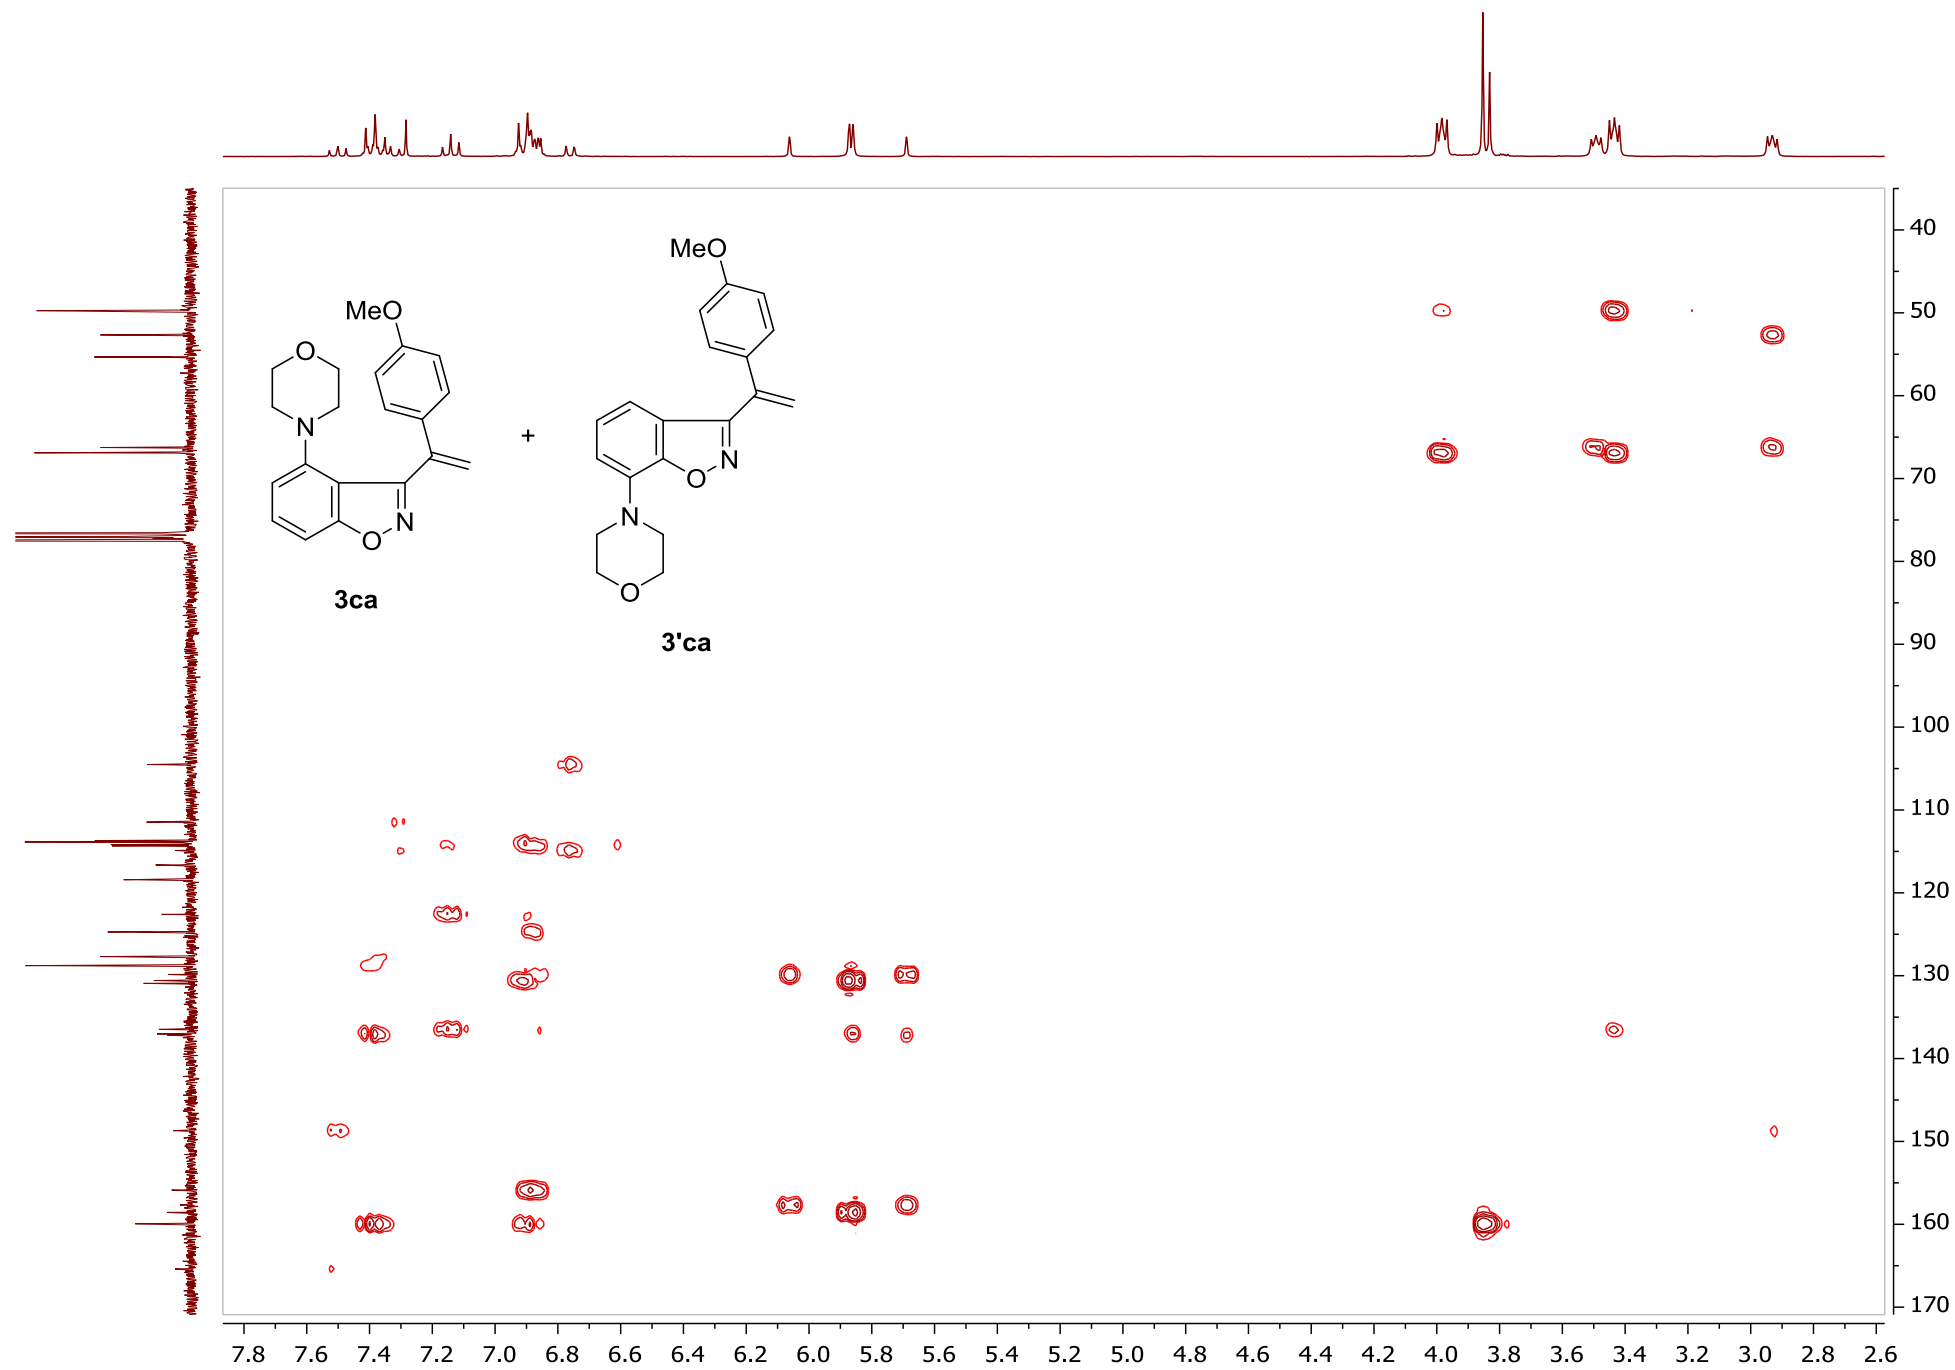



**4a-(4-Methoxyphenyl)-3,3-dimethyl-9-morpholino-4,4a-dihydro-3H-benzofuro[3,2-c][1,2]oxazine 4ca**

<sup>1</sup>H NMR (300 MHz, CDCl<sub>3</sub>)

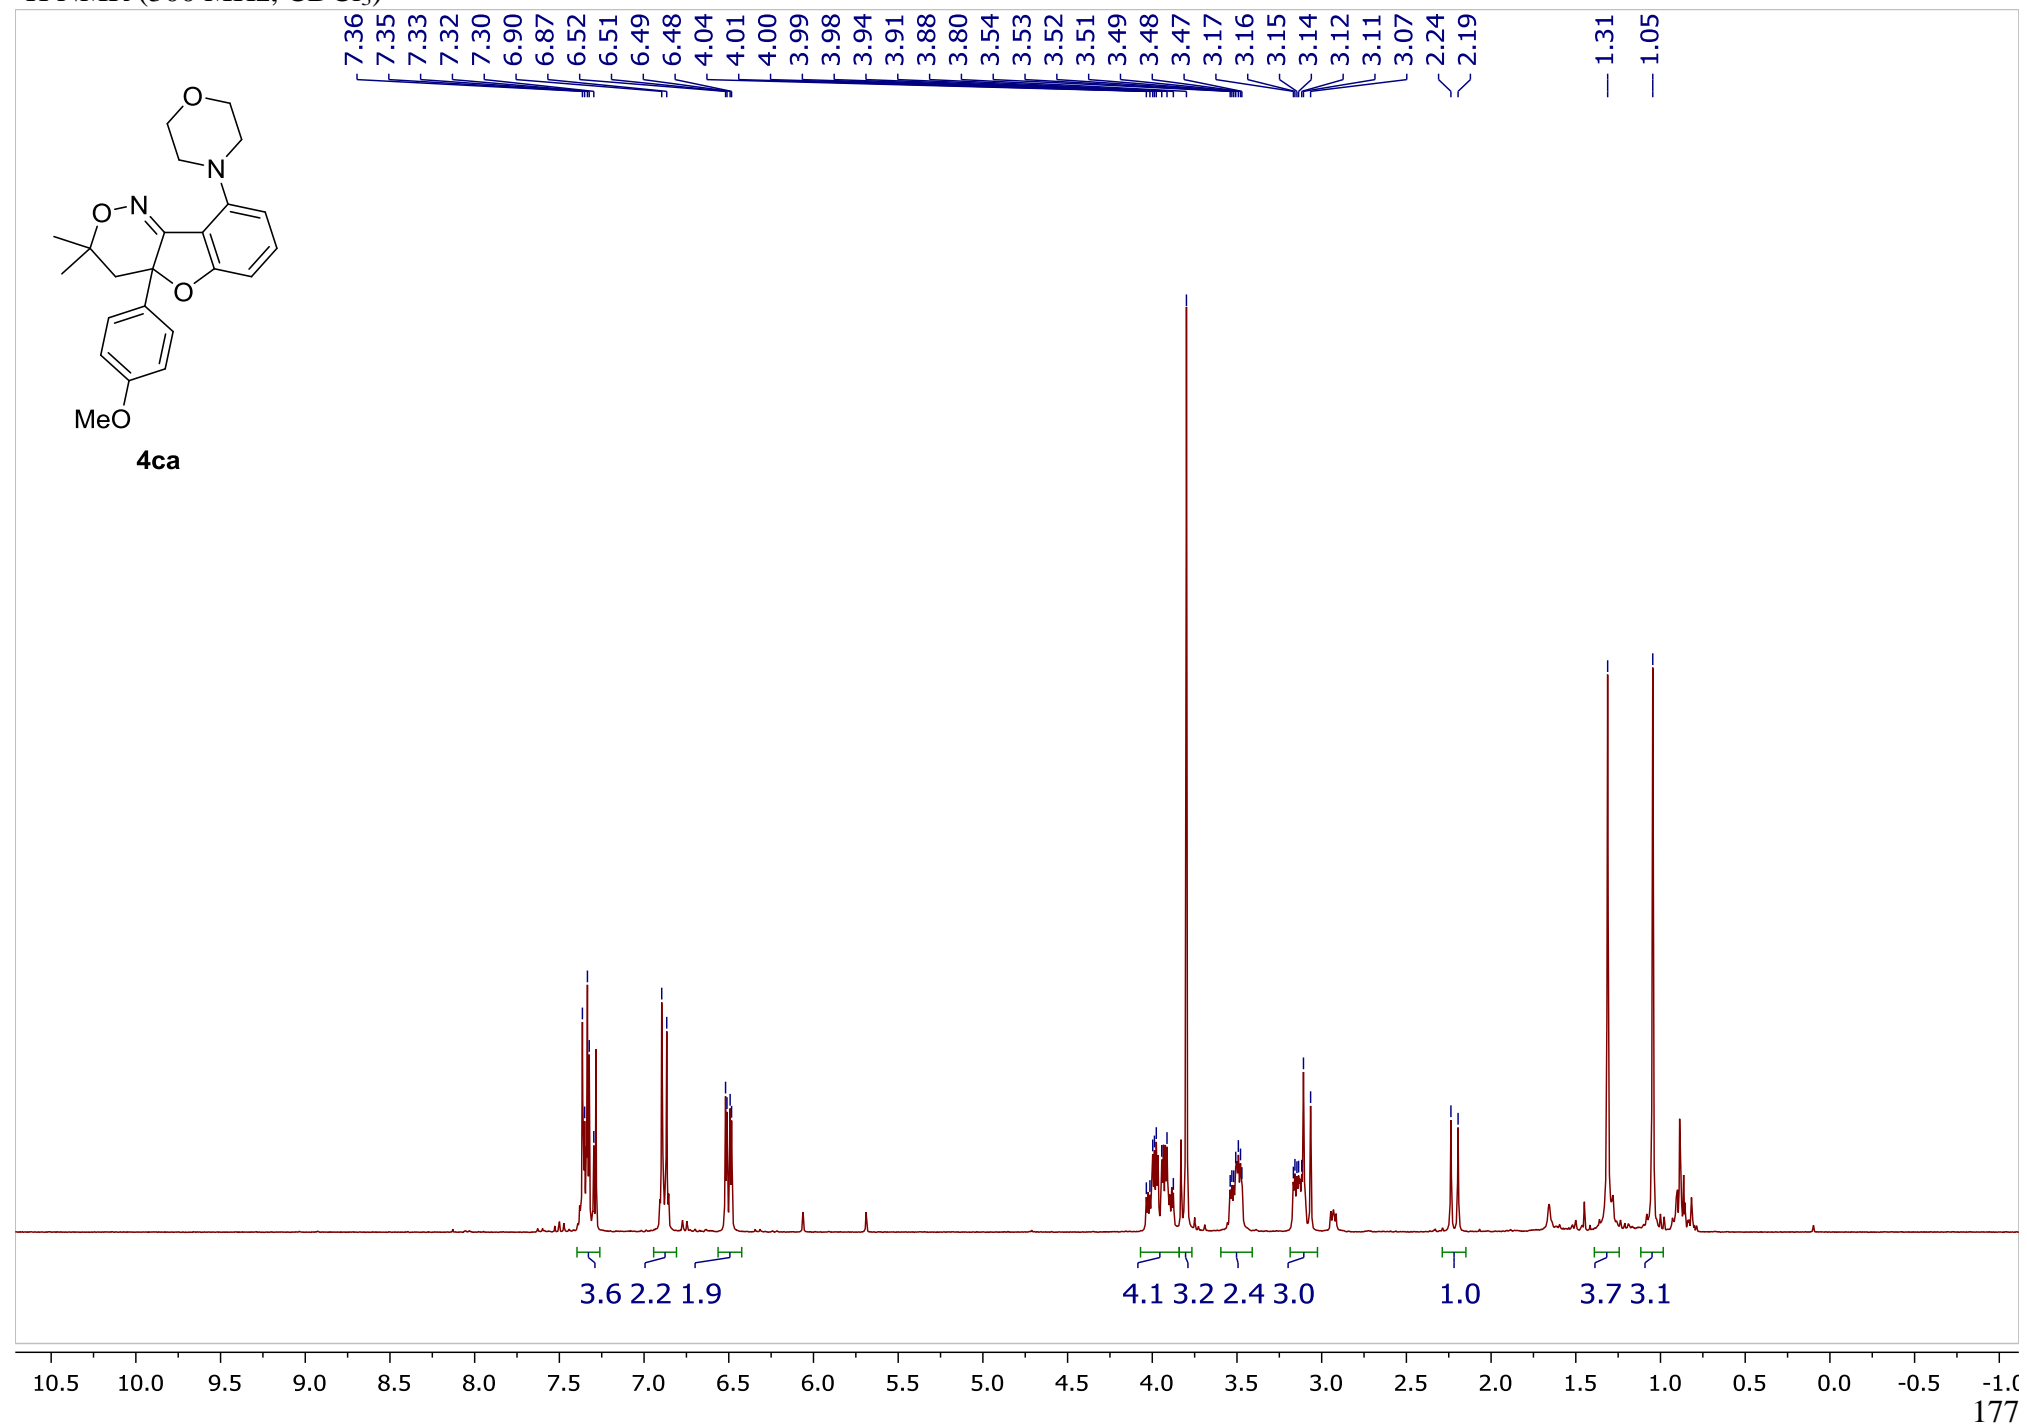

$^{13}\text{C}\{^1\text{H}\}$  NMR (75 MHz,  $\text{CDCl}_3$ )

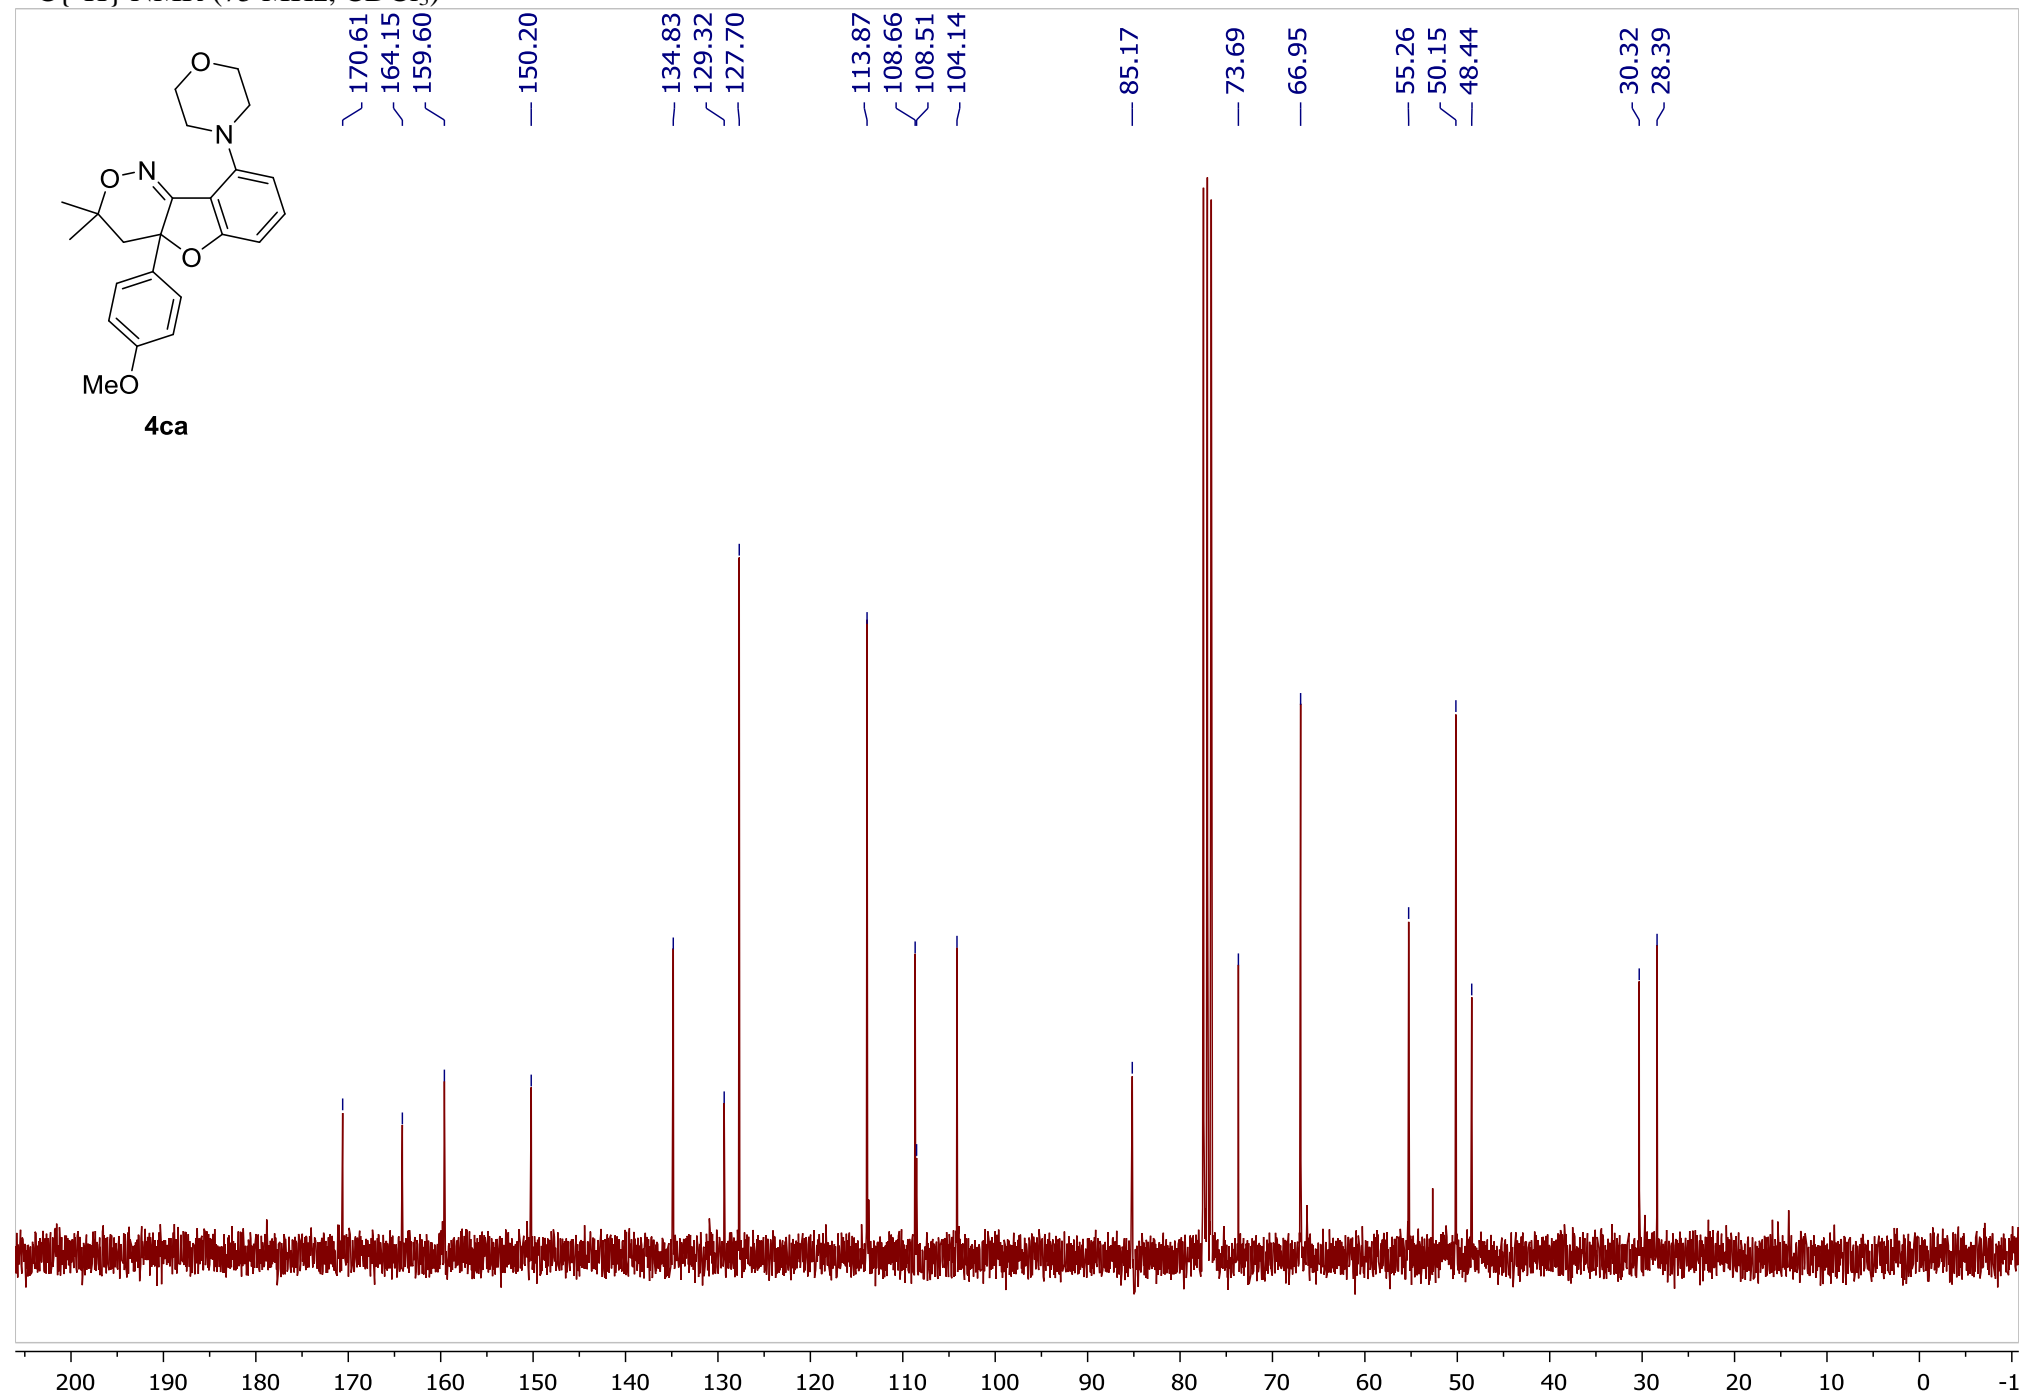

$^{13}\text{C}$  DEPT 135 (75 MHz,  $\text{CDCl}_3$ )

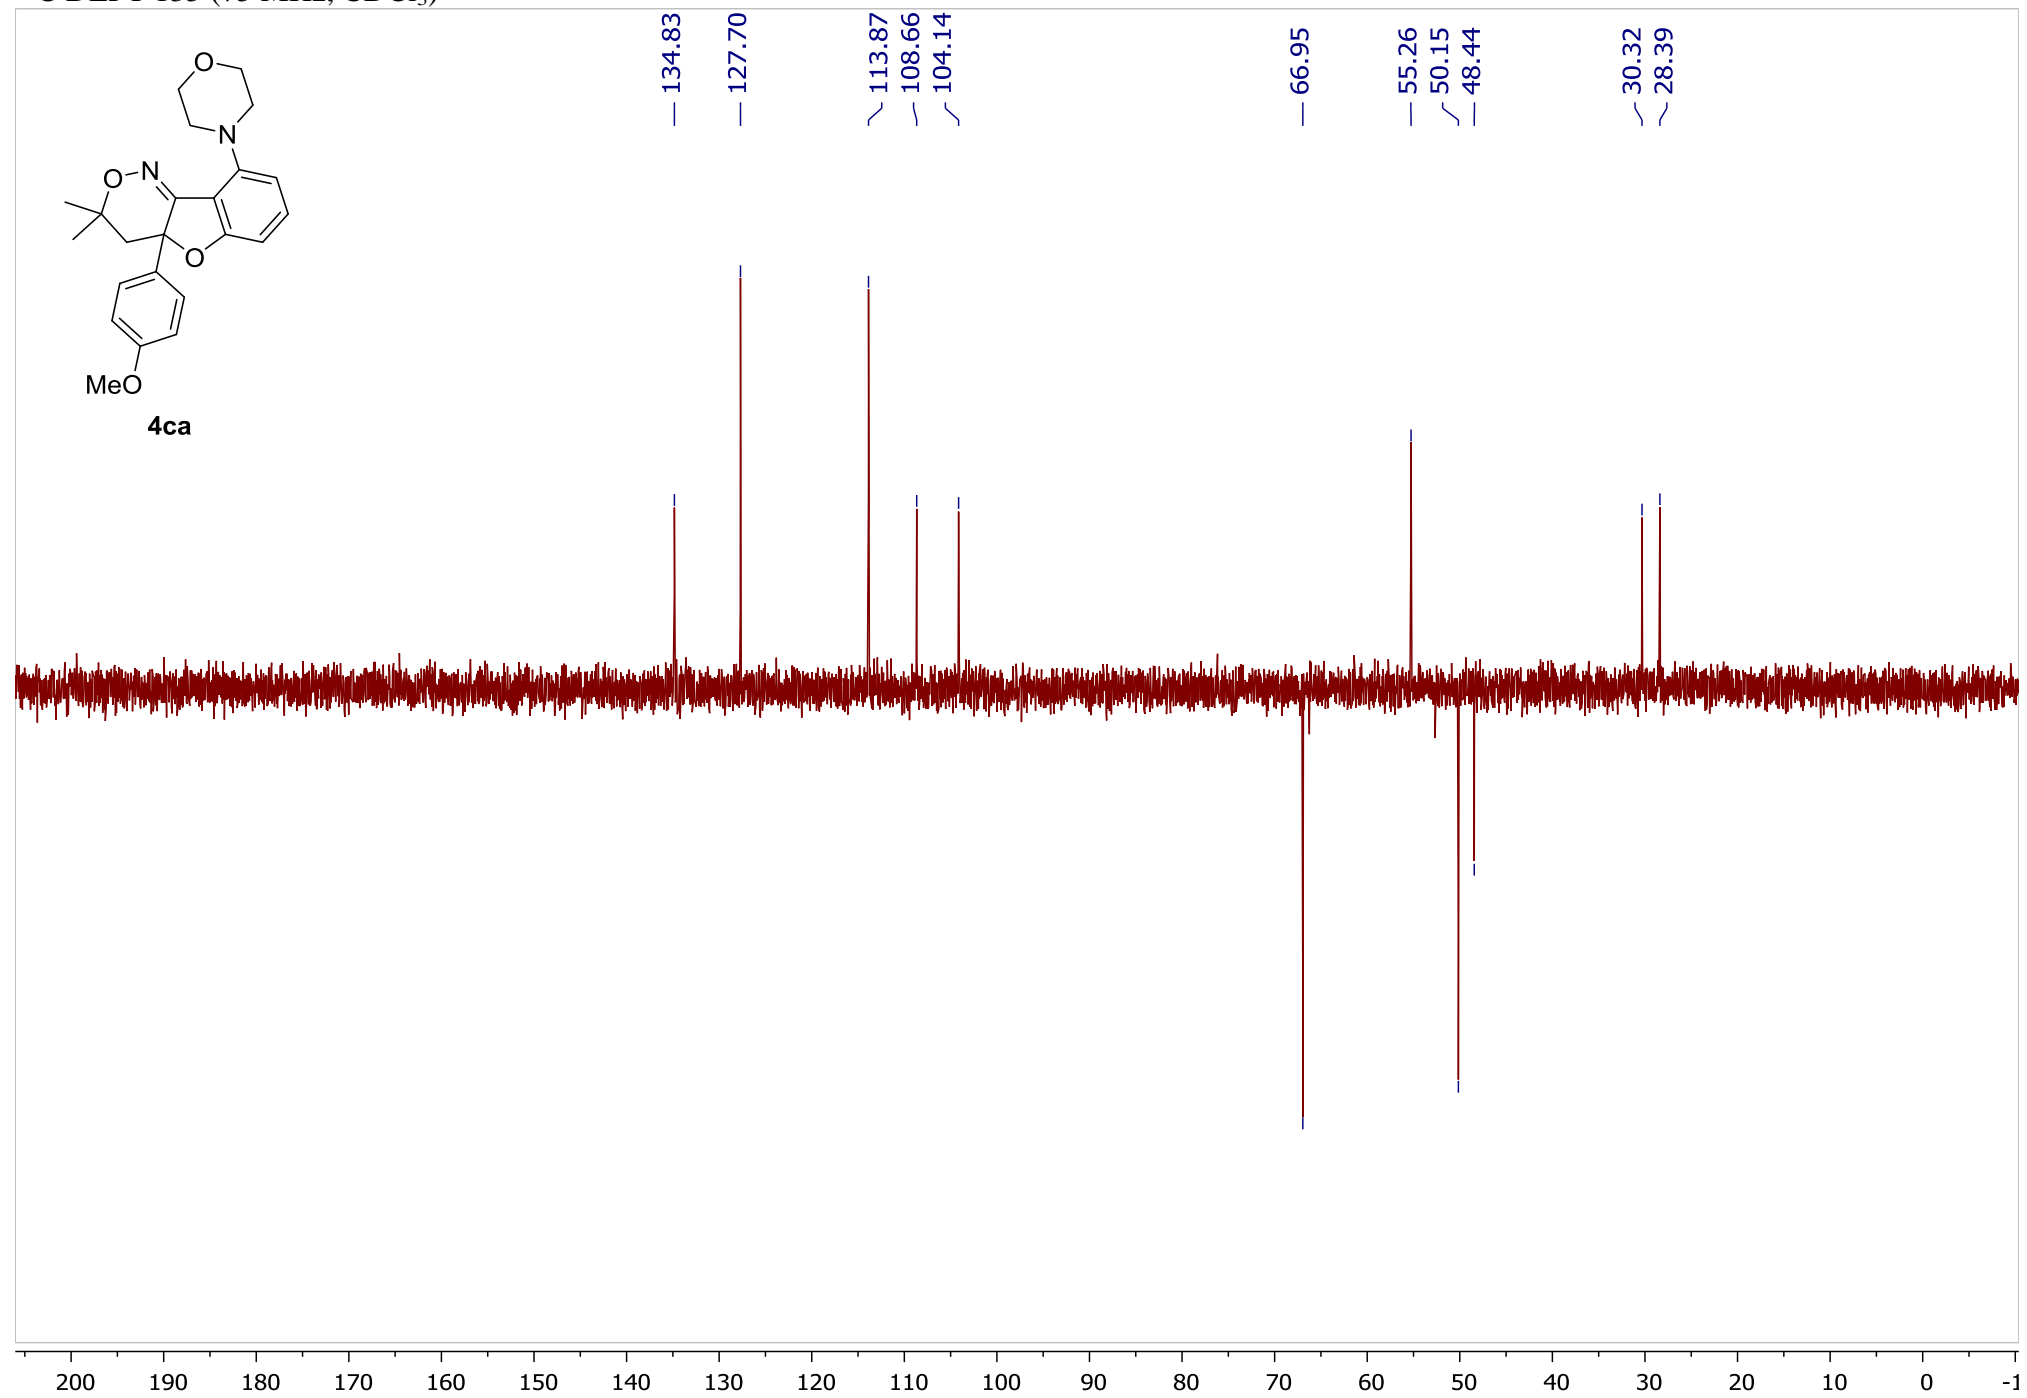

$^1\text{H}$ - $^1\text{H}$  COSY

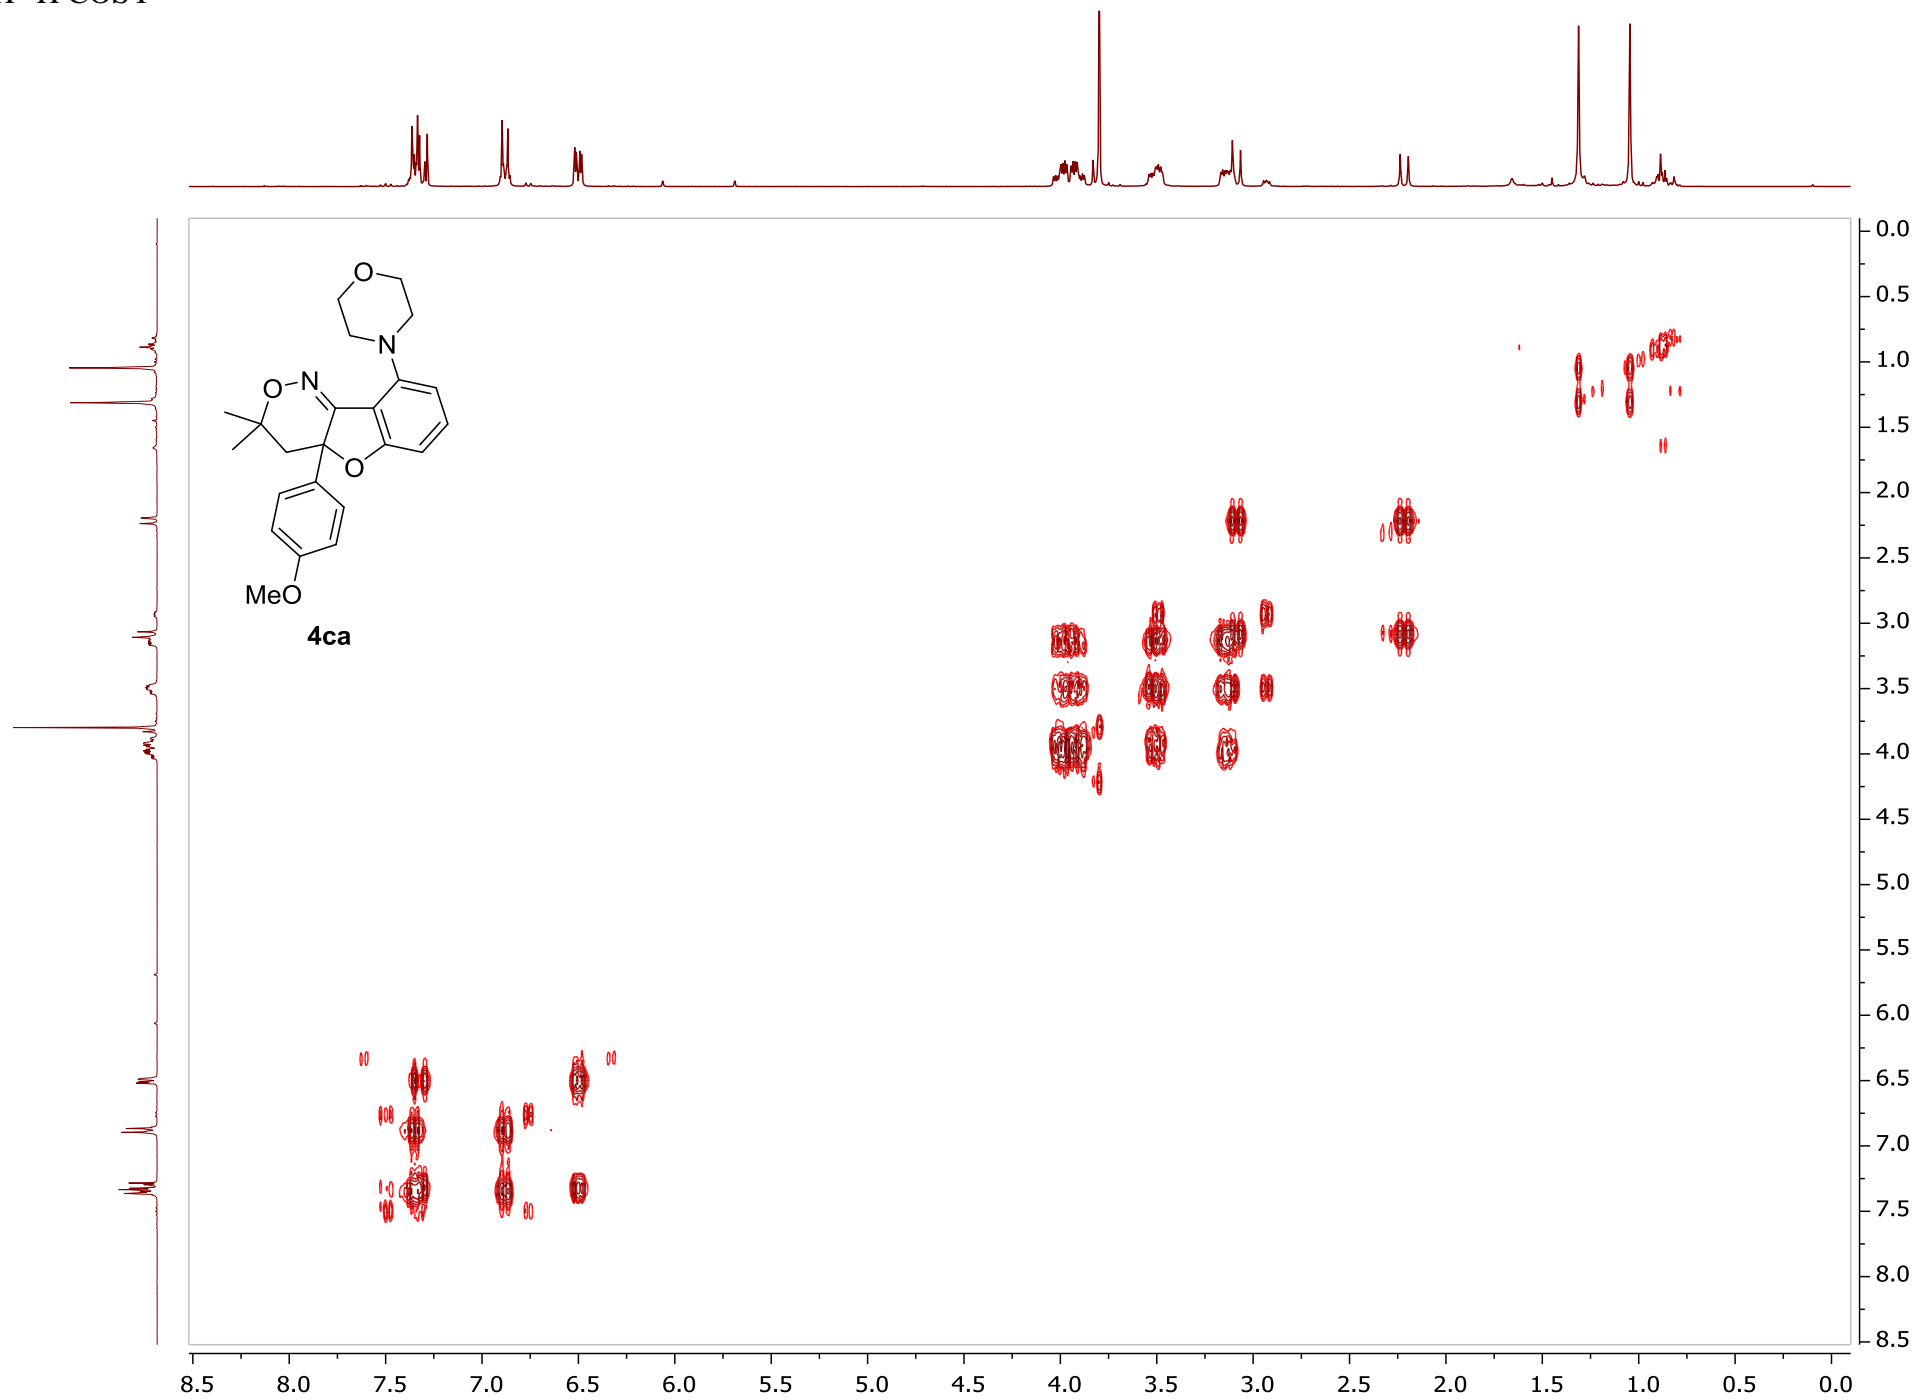

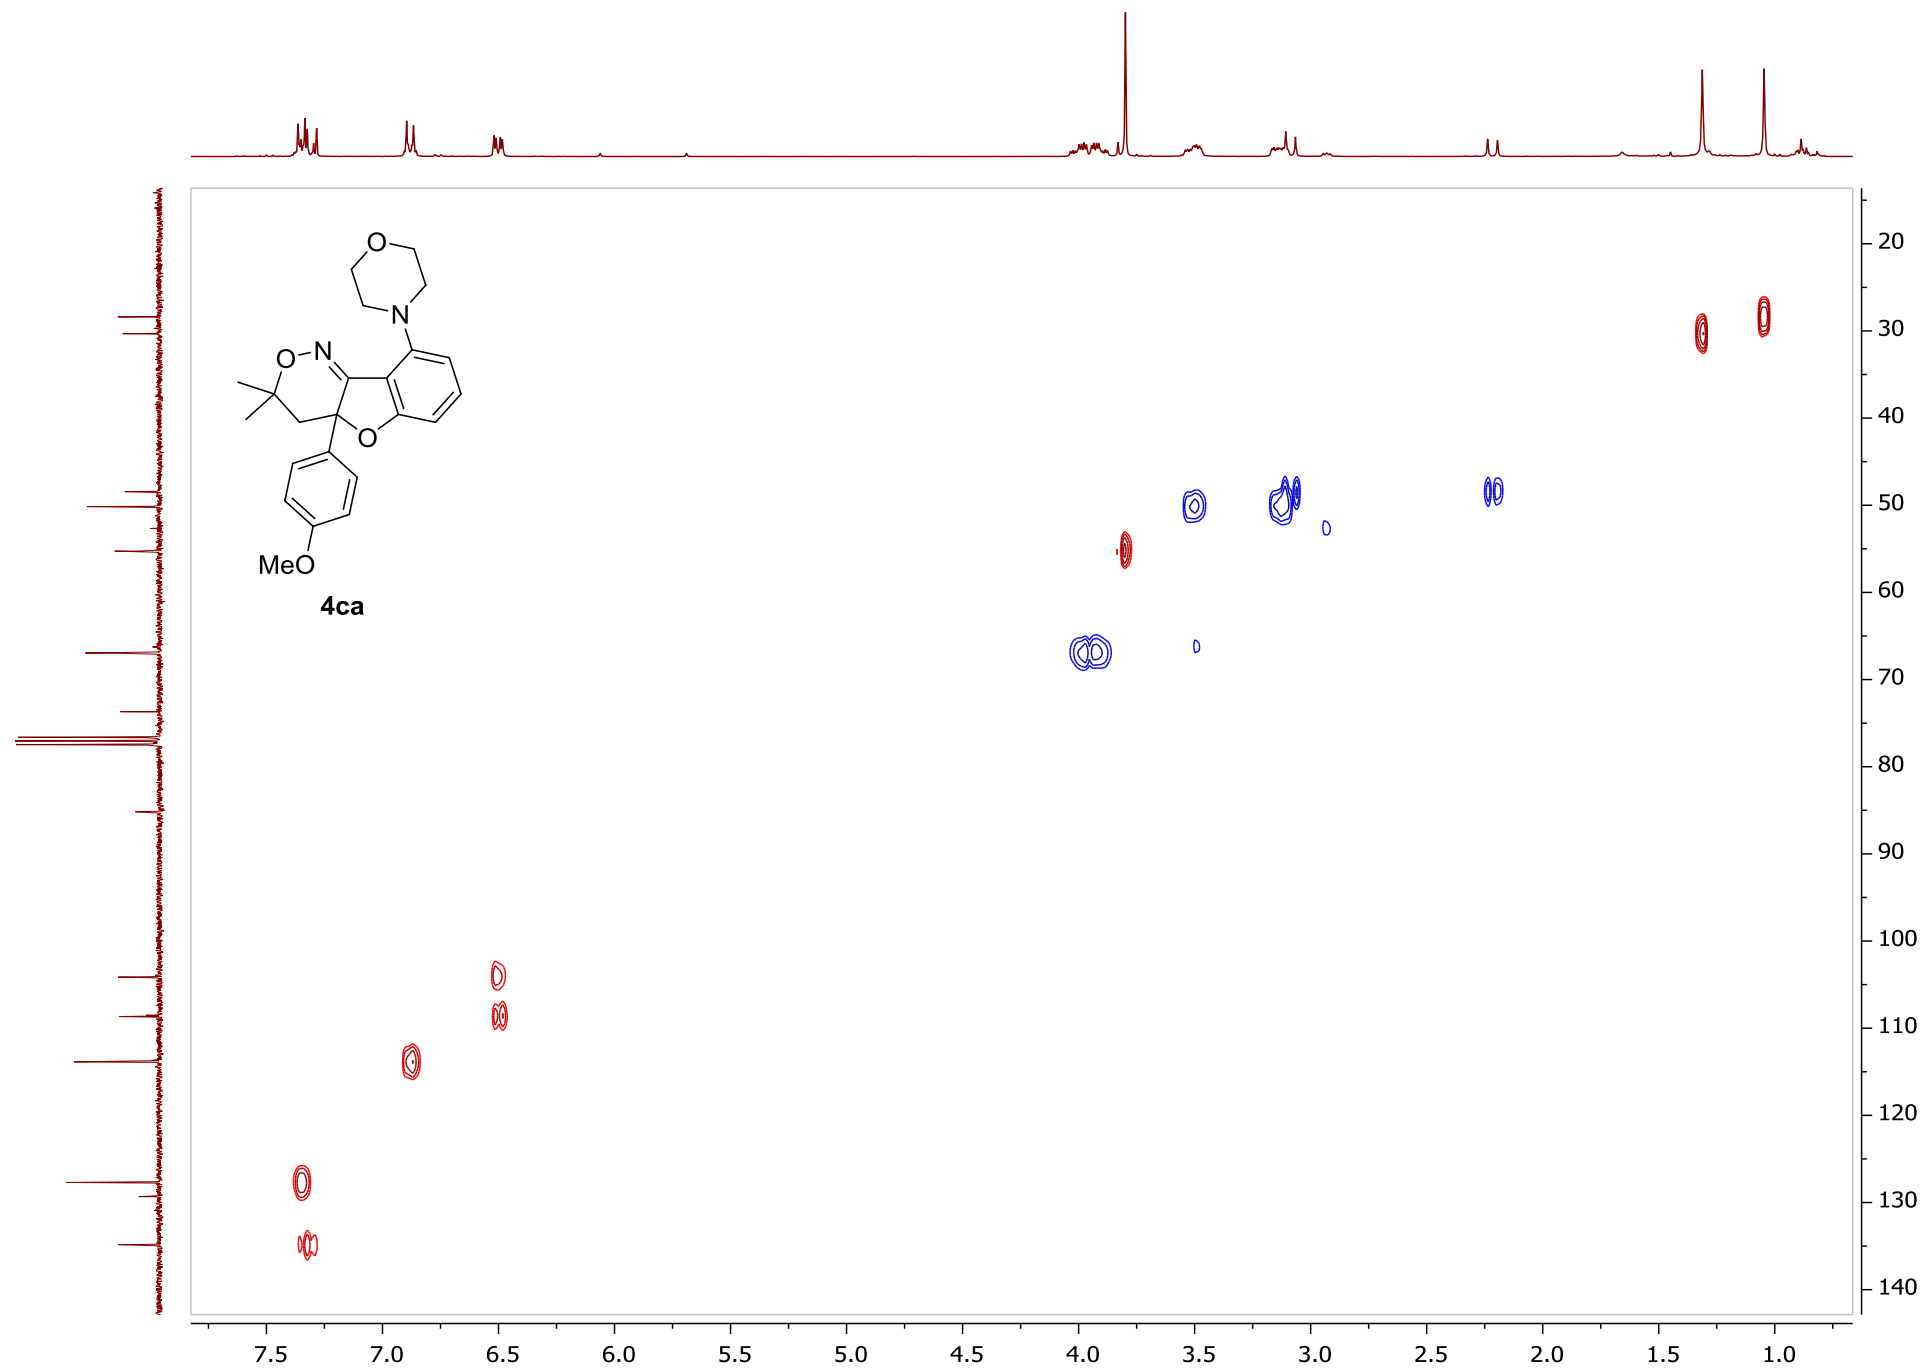

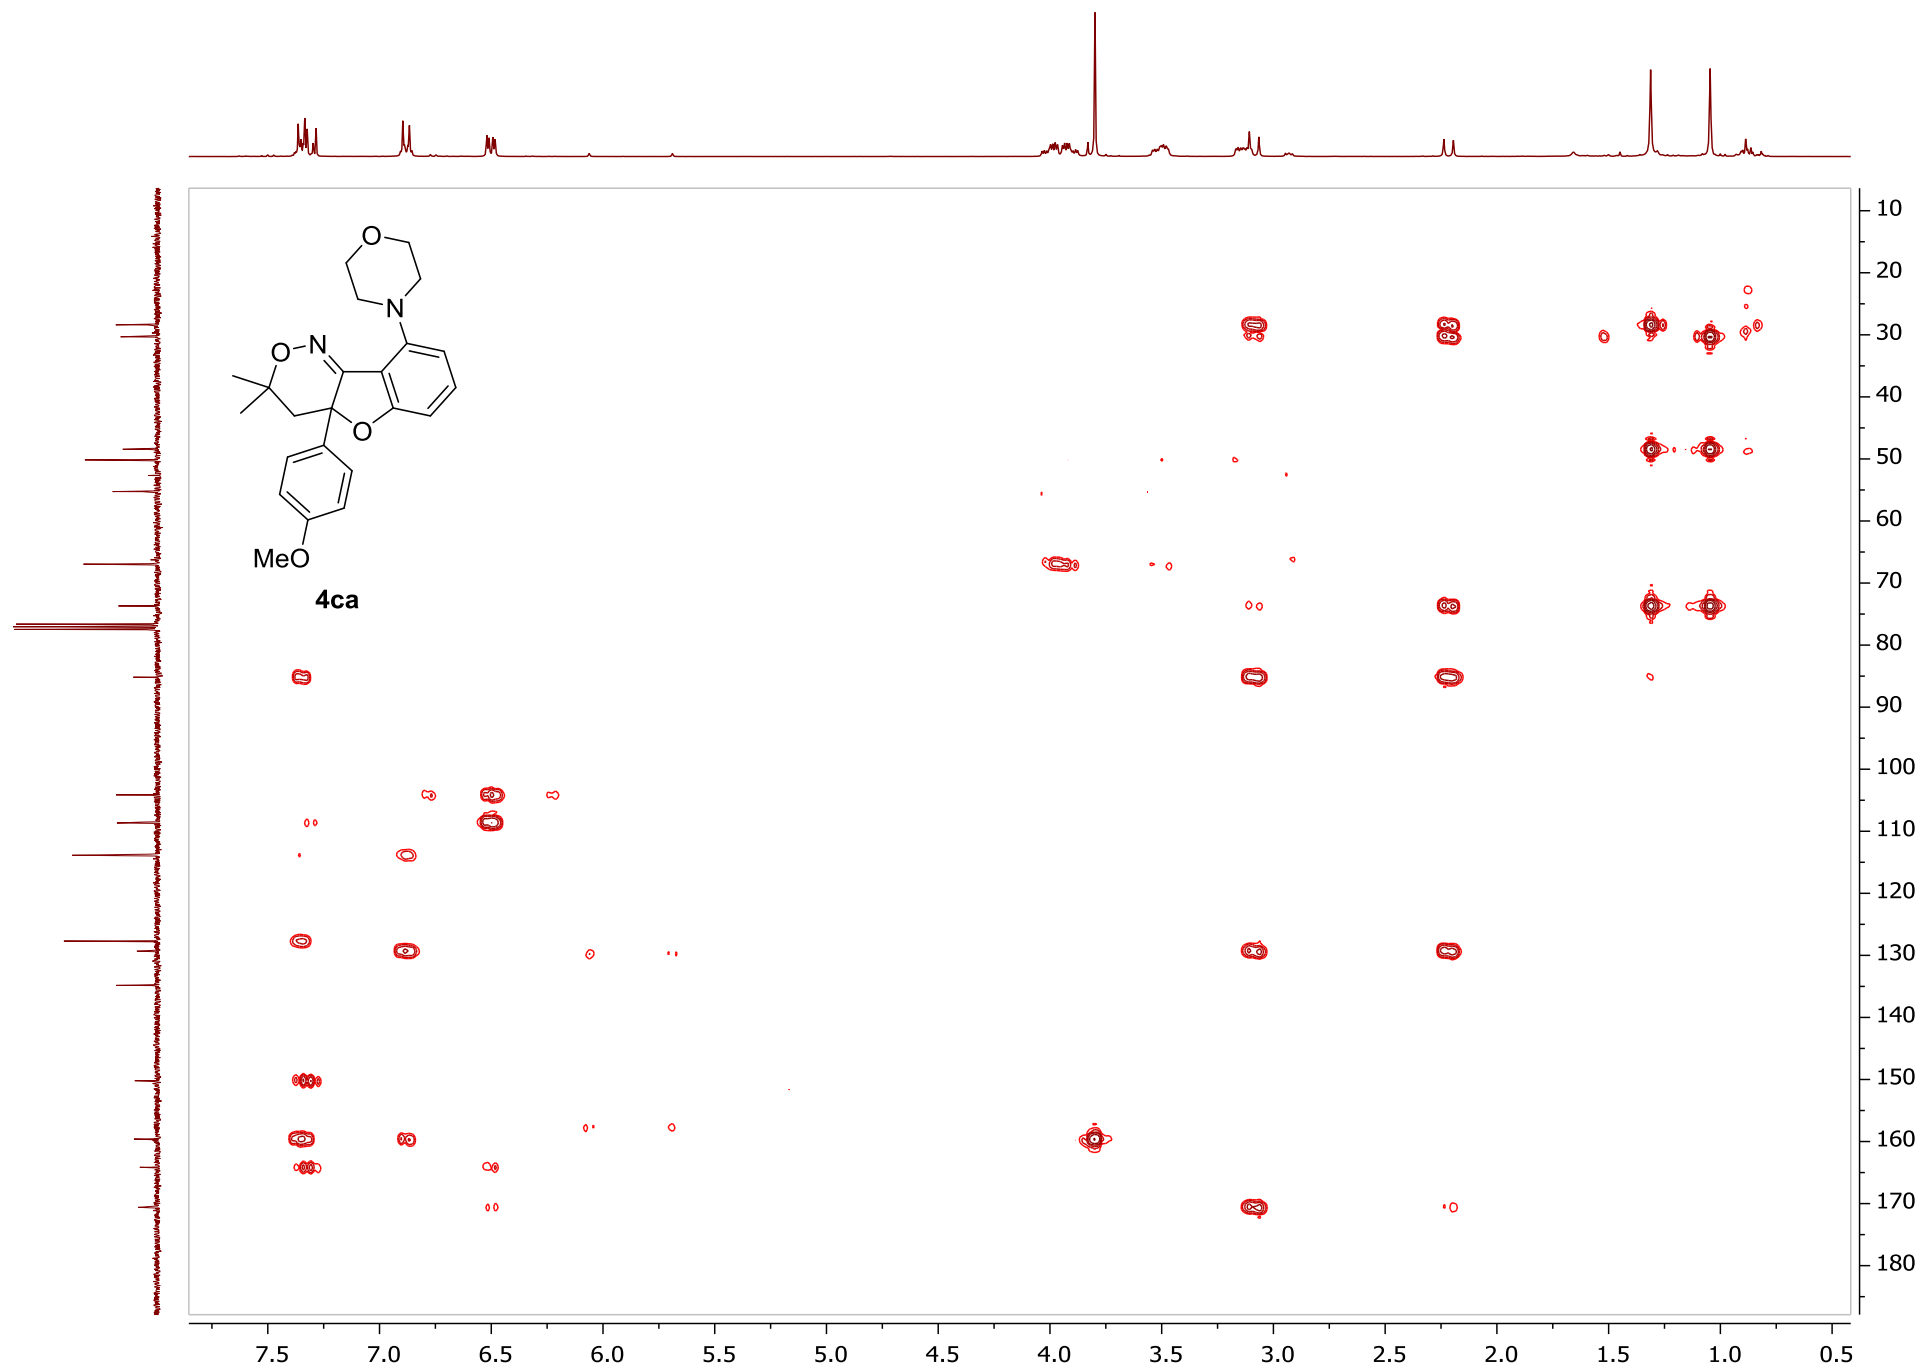

**9-Bromo-4a-(4-methoxyphenyl)-3,3-dimethyl-4,4a-dihydro-3H-benzofuro[3,2-c][1,2]oxazine 4da**

<sup>1</sup>H NMR (300 MHz, CDCl<sub>3</sub>)

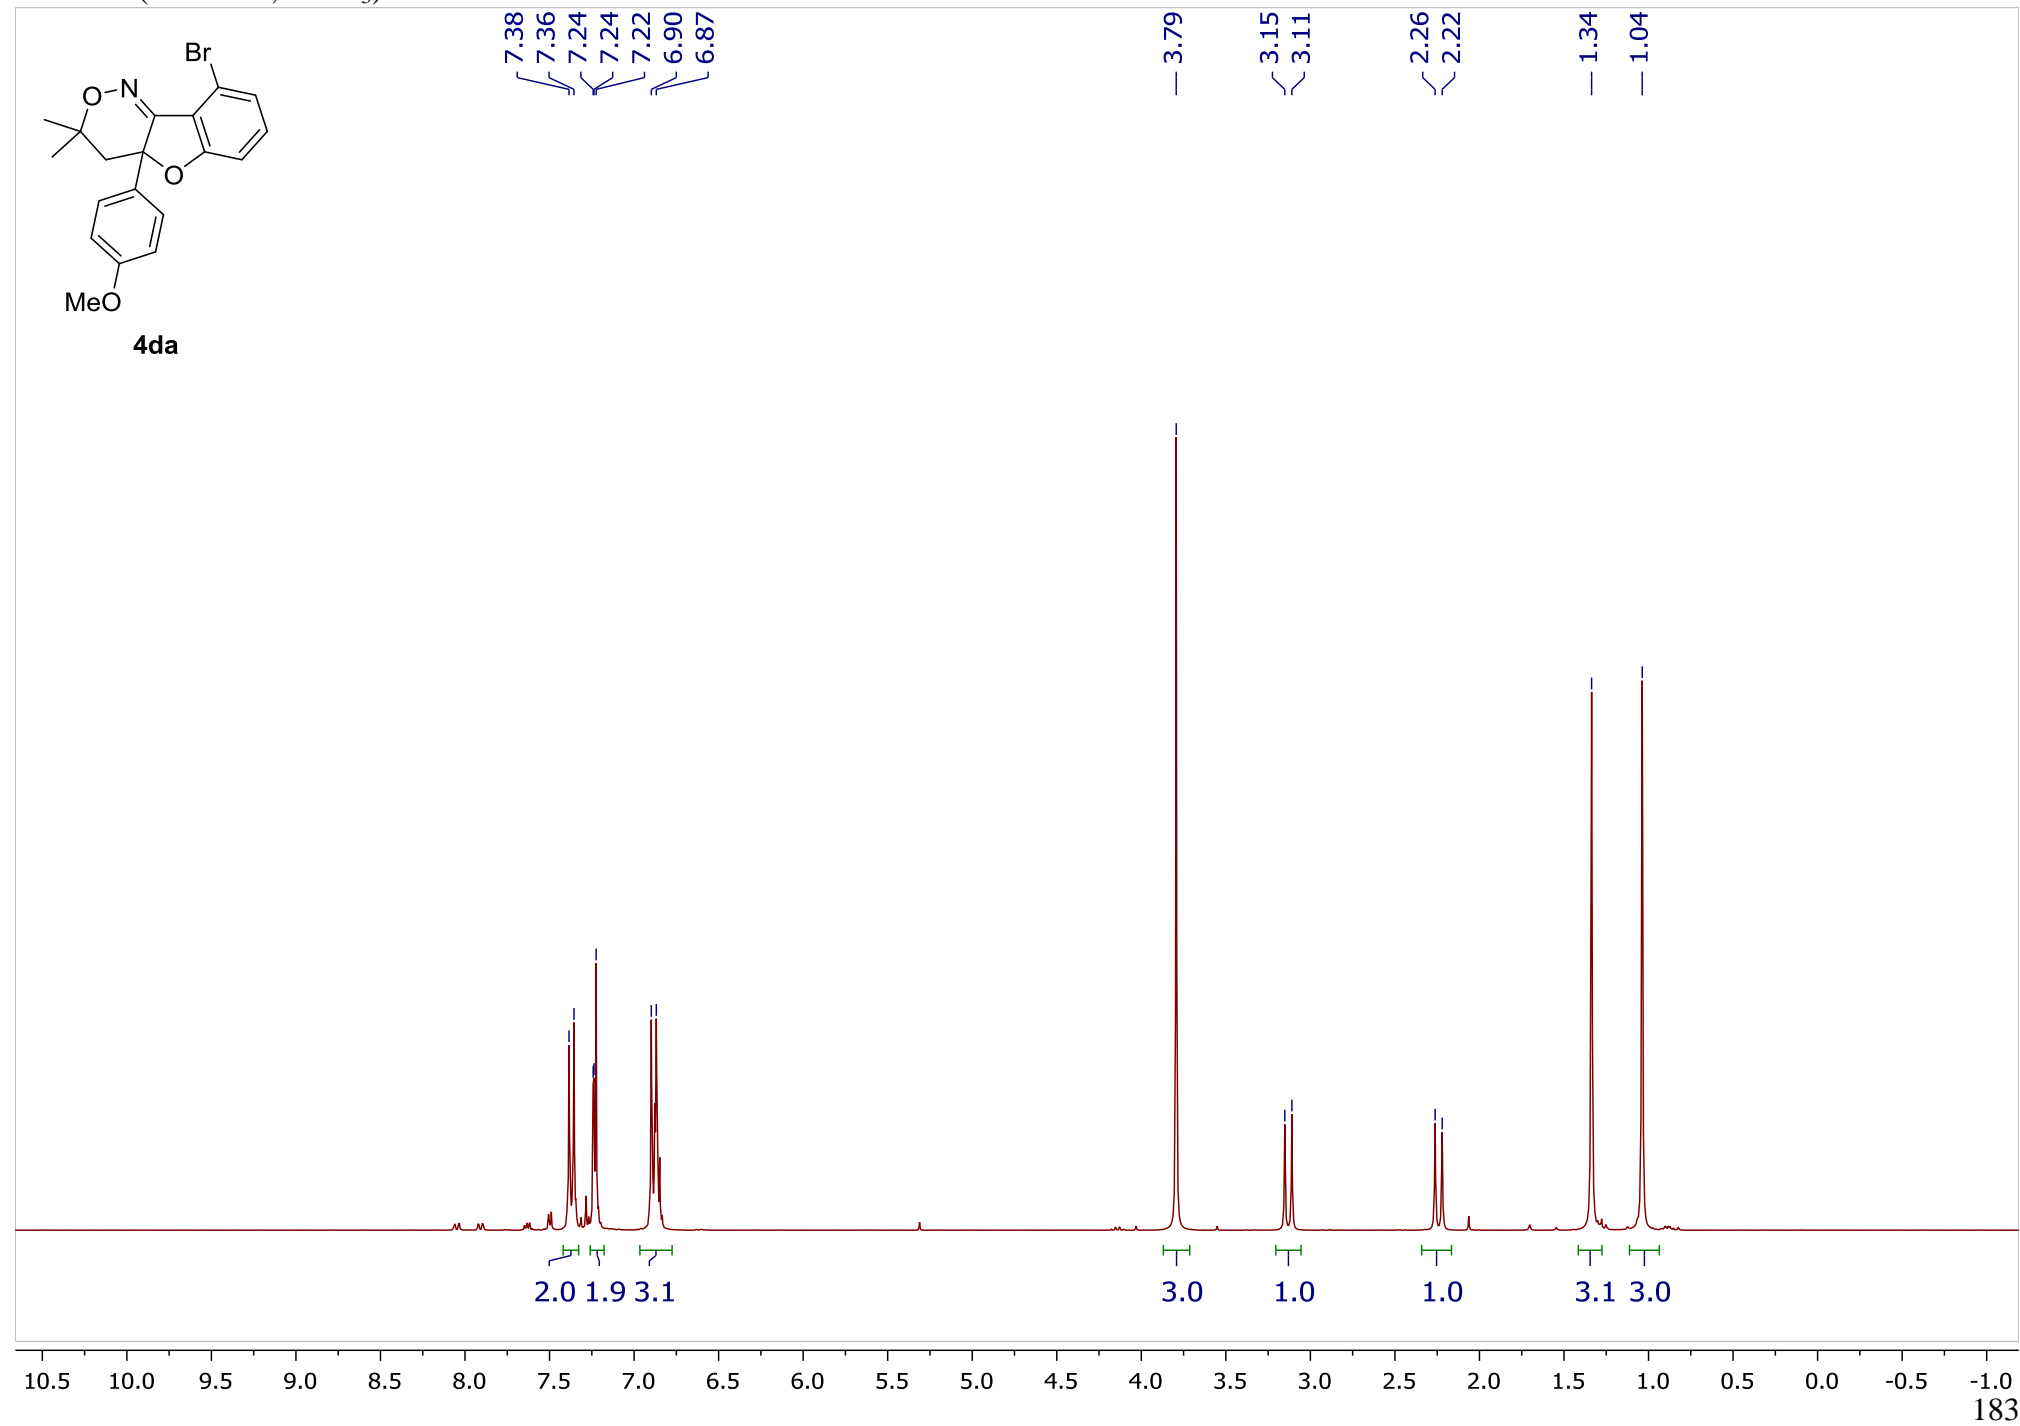

$^{13}\text{C}\{^1\text{H}\}$  NMR (75 MHz,  $\text{CDCl}_3$ )

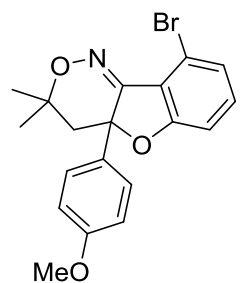

**4da**

~ 170.14  
~ 163.37  
~ 159.85

~ 134.18  
~ 128.24  
~ 127.88  
~ 126.18  
~ 119.04  
~ 118.04  
~ 113.95  
~ 110.66

— 86.64

— 74.51

— 55.28

— 48.38

~ 30.51  
~ 28.31

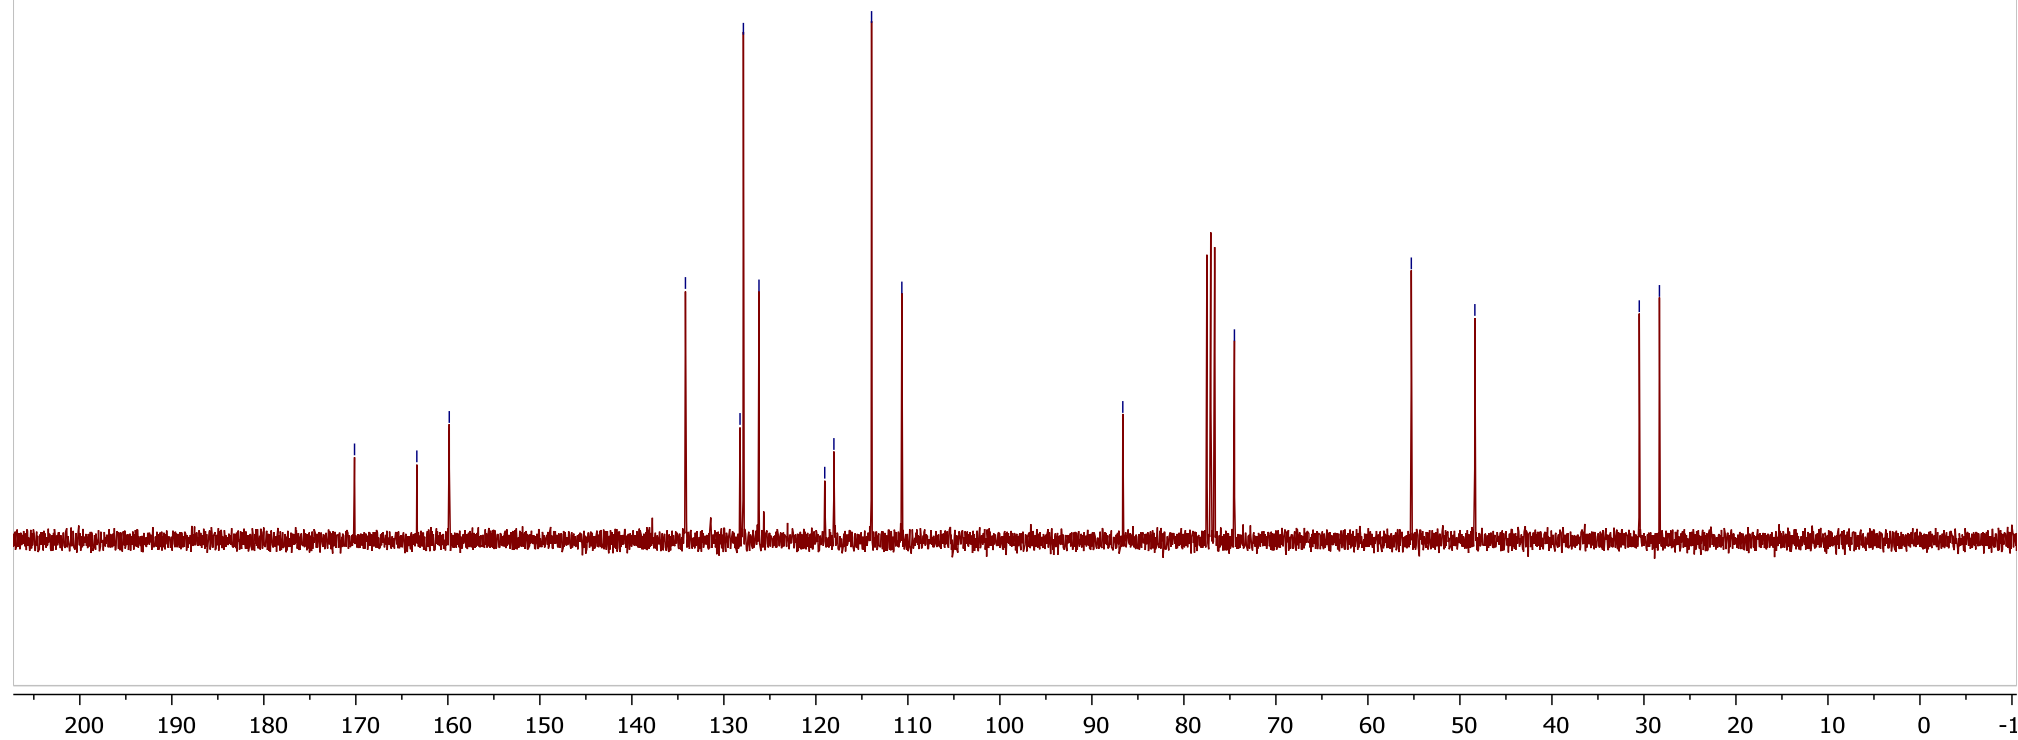



$^{13}\text{C}$  DEPT 135 (75 MHz,  $\text{CDCl}_3$ )

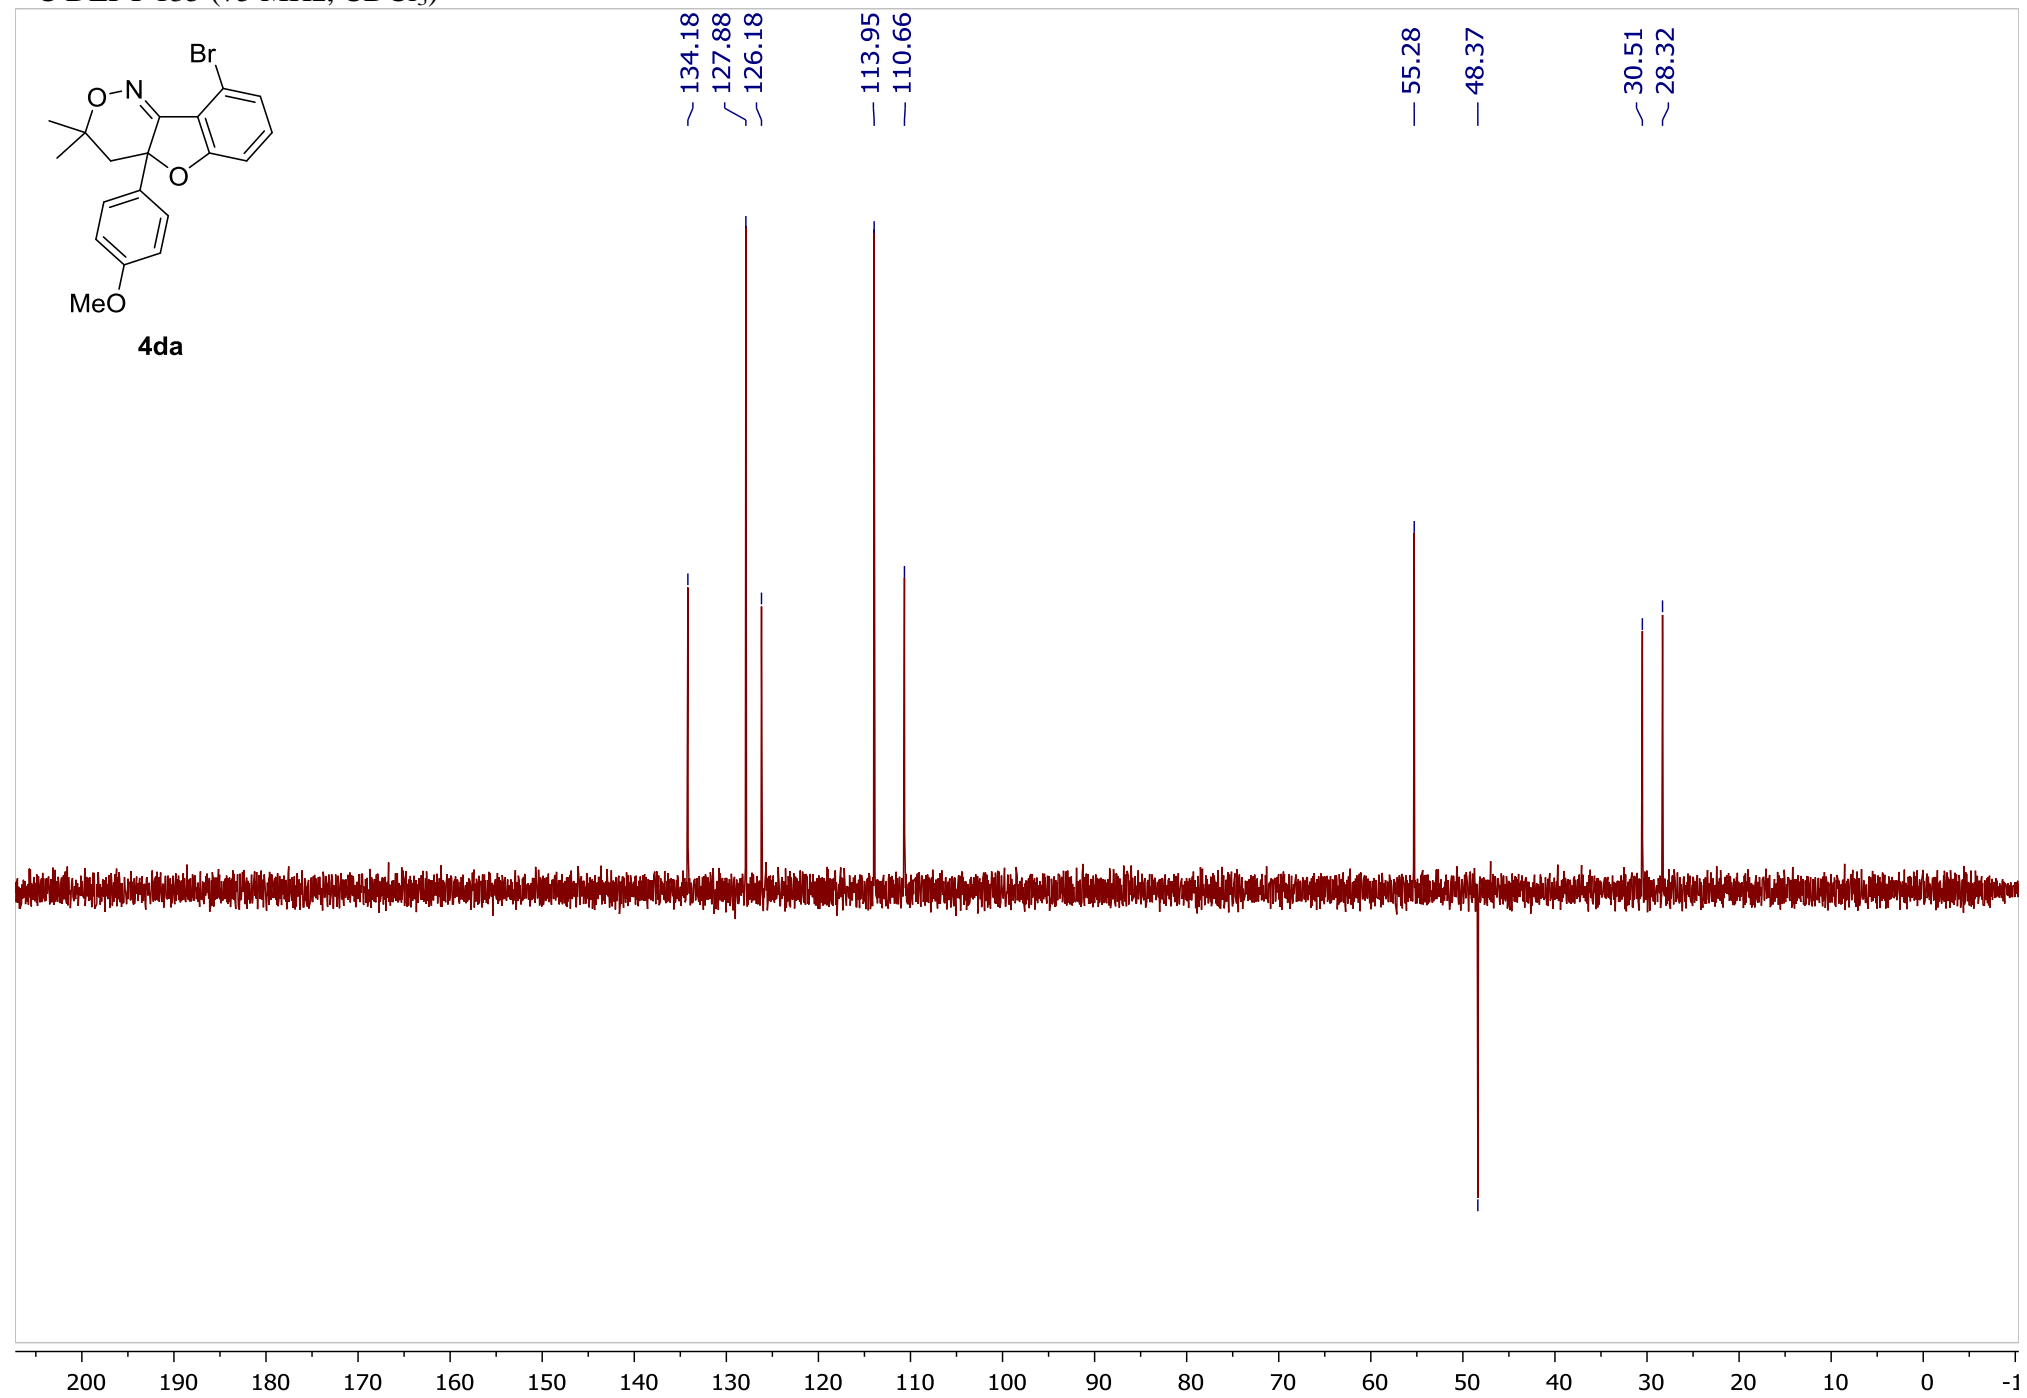

$^1\text{H}$ - $^1\text{H}$  COSY

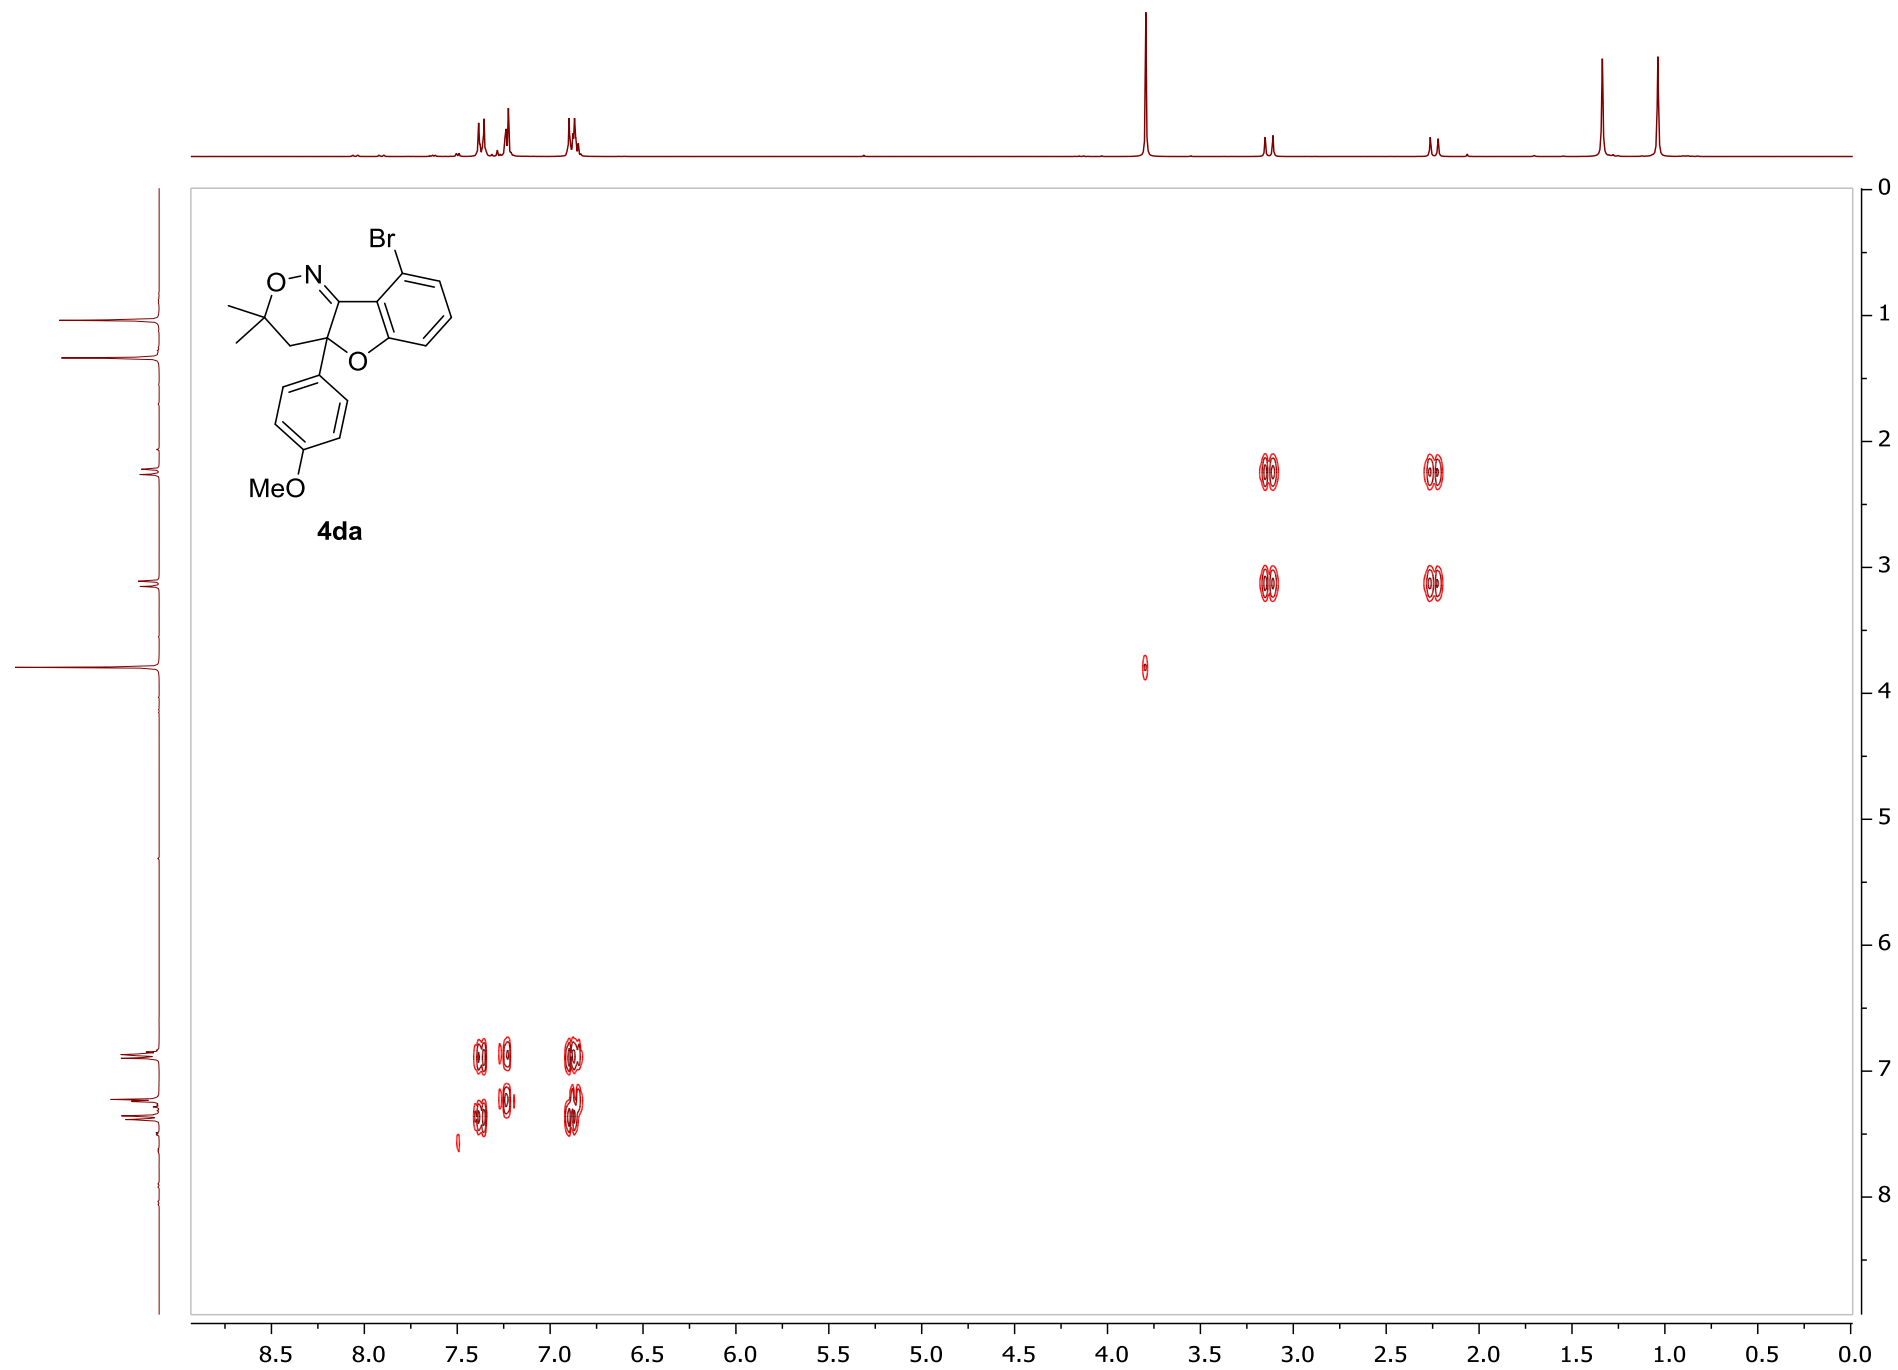

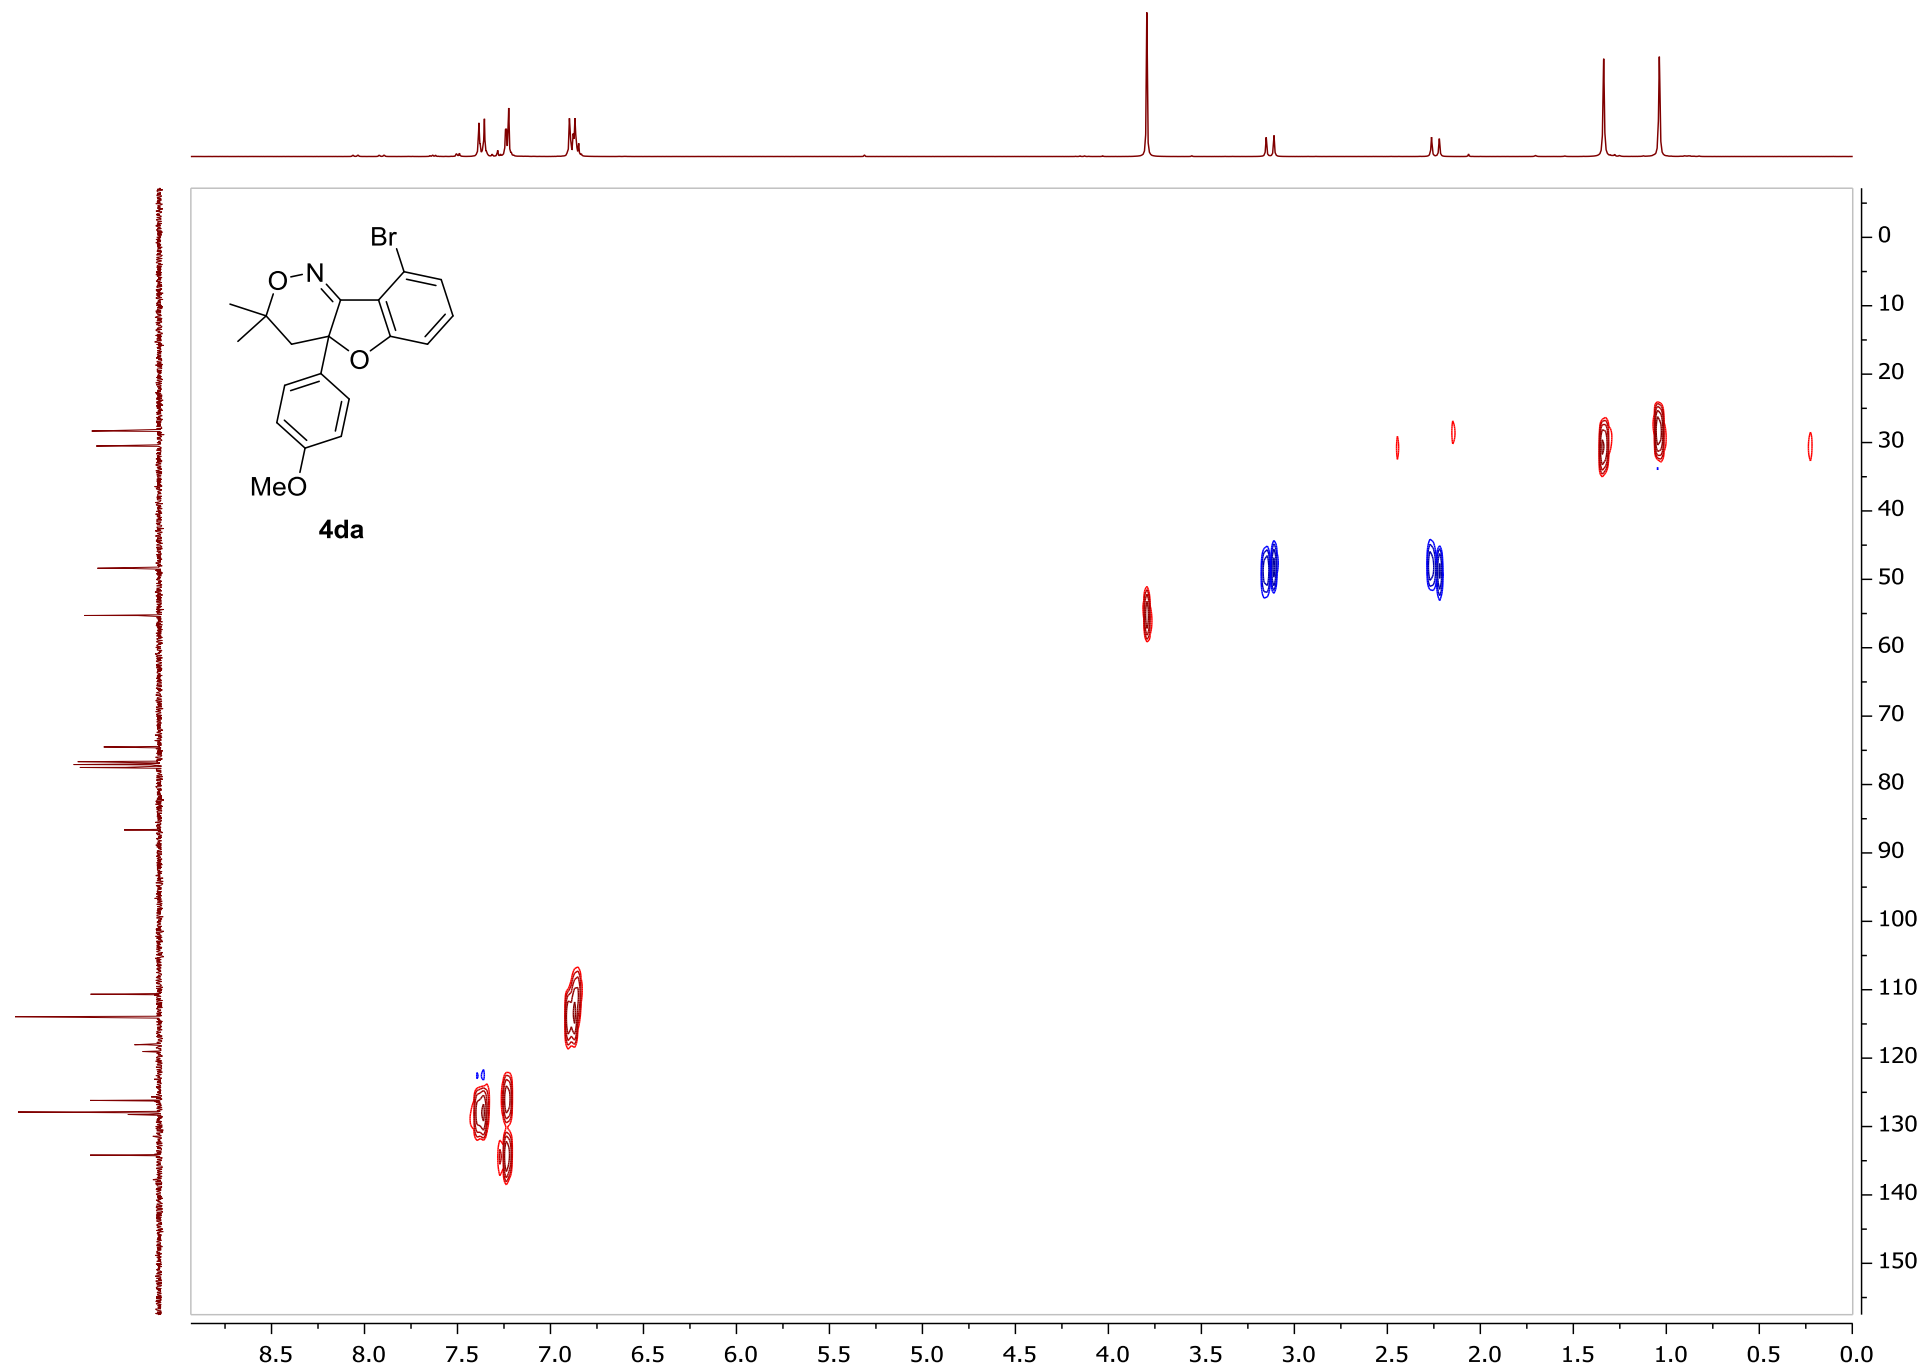

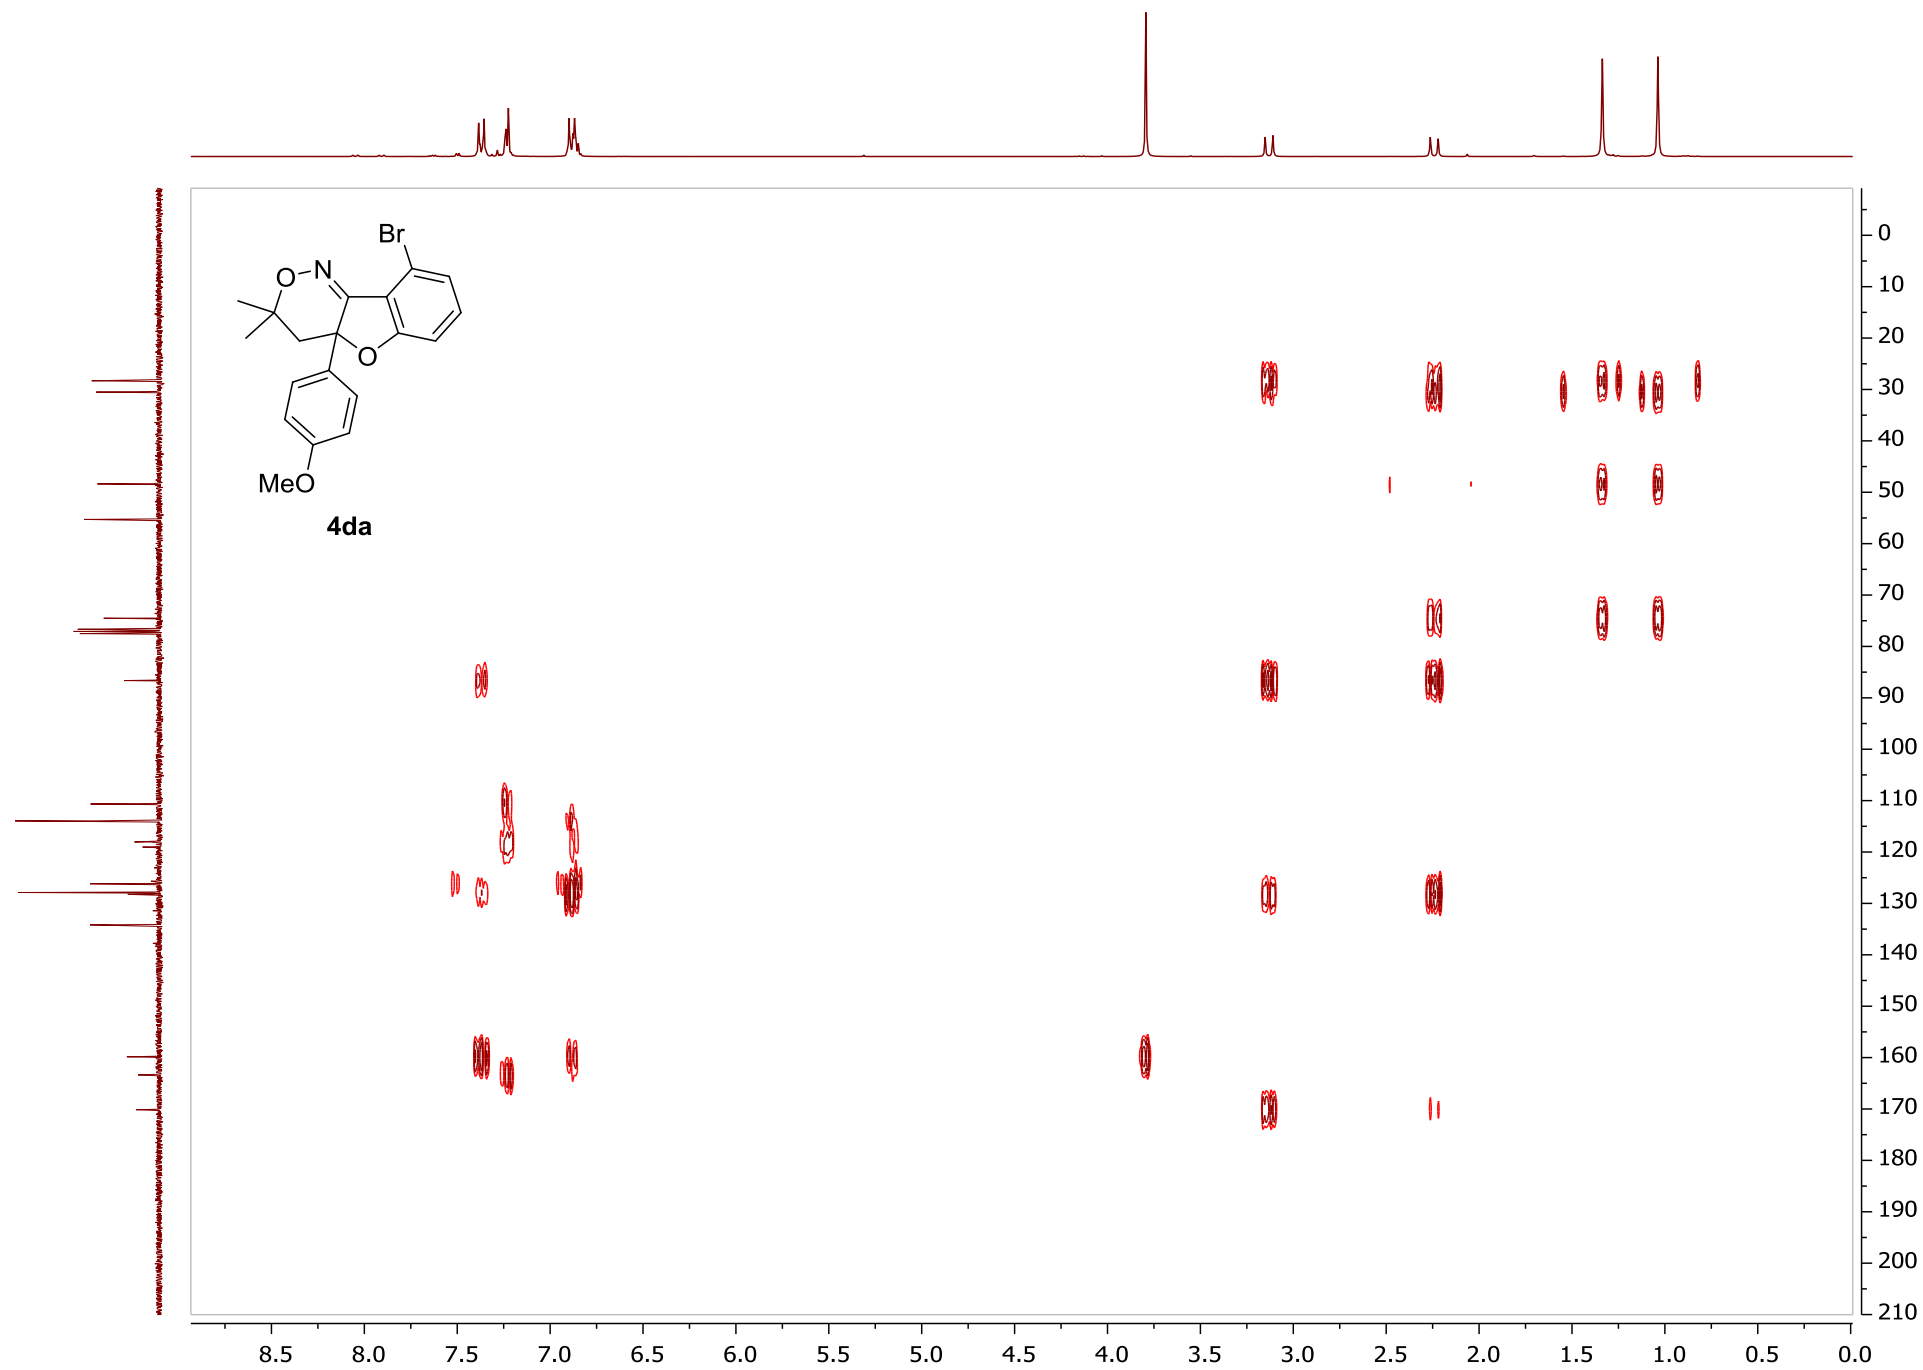

**6-(Benzo[d]isoxazol-3-yl)-6-(4-methoxyphenyl)hex-5-enal 3ap, Z-isomer**

<sup>1</sup>H NMR (300 MHz, CDCl<sub>3</sub>)

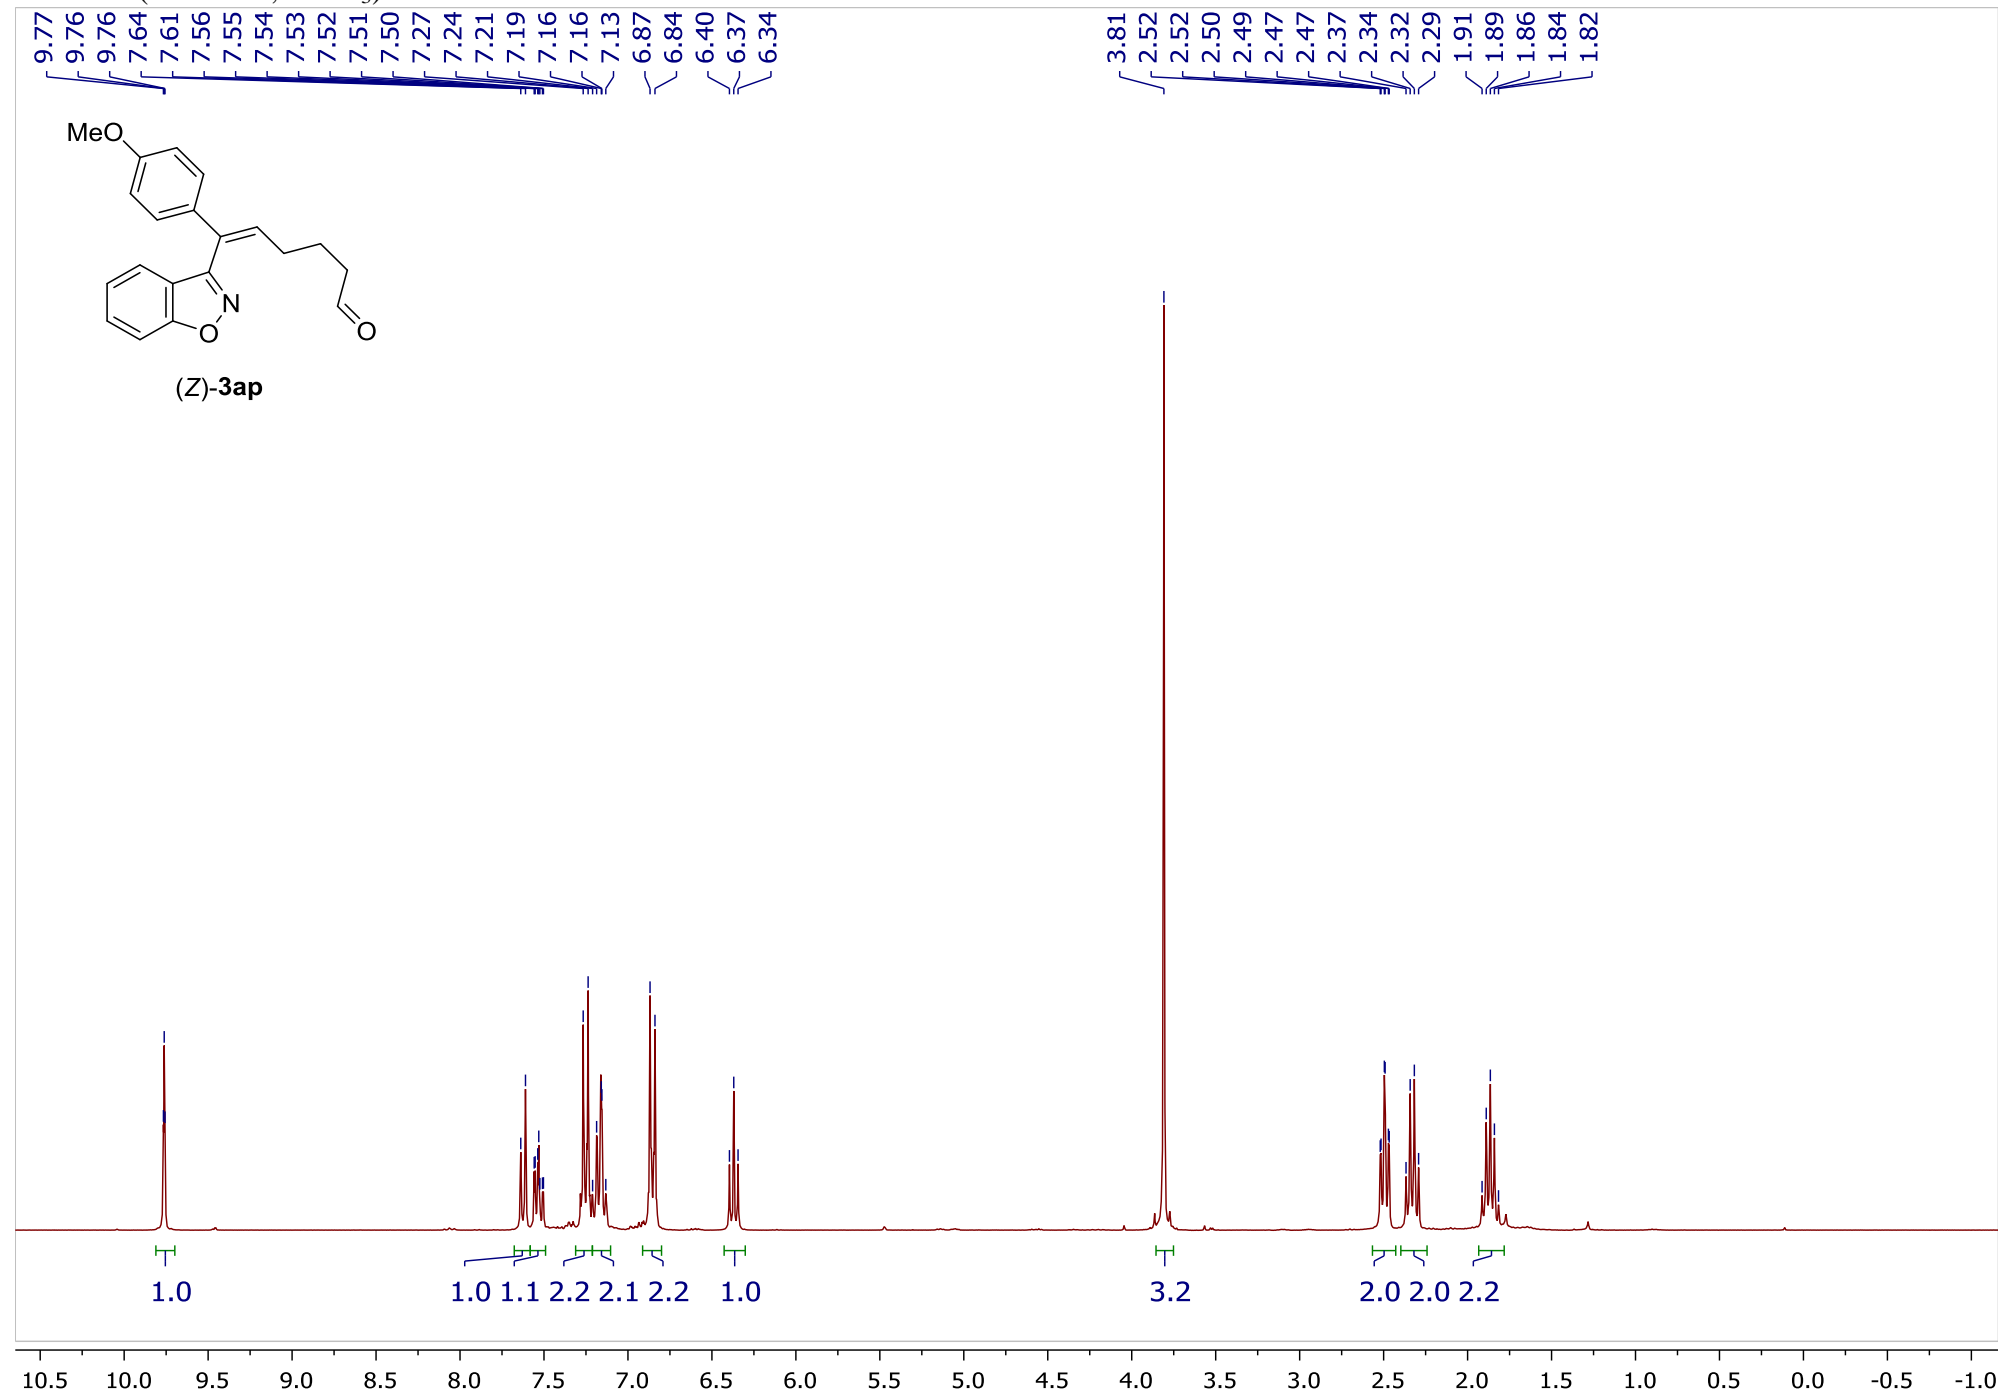

$^{13}\text{C}\{^1\text{H}\}$  NMR (75 MHz,  $\text{CDCl}_3$ )

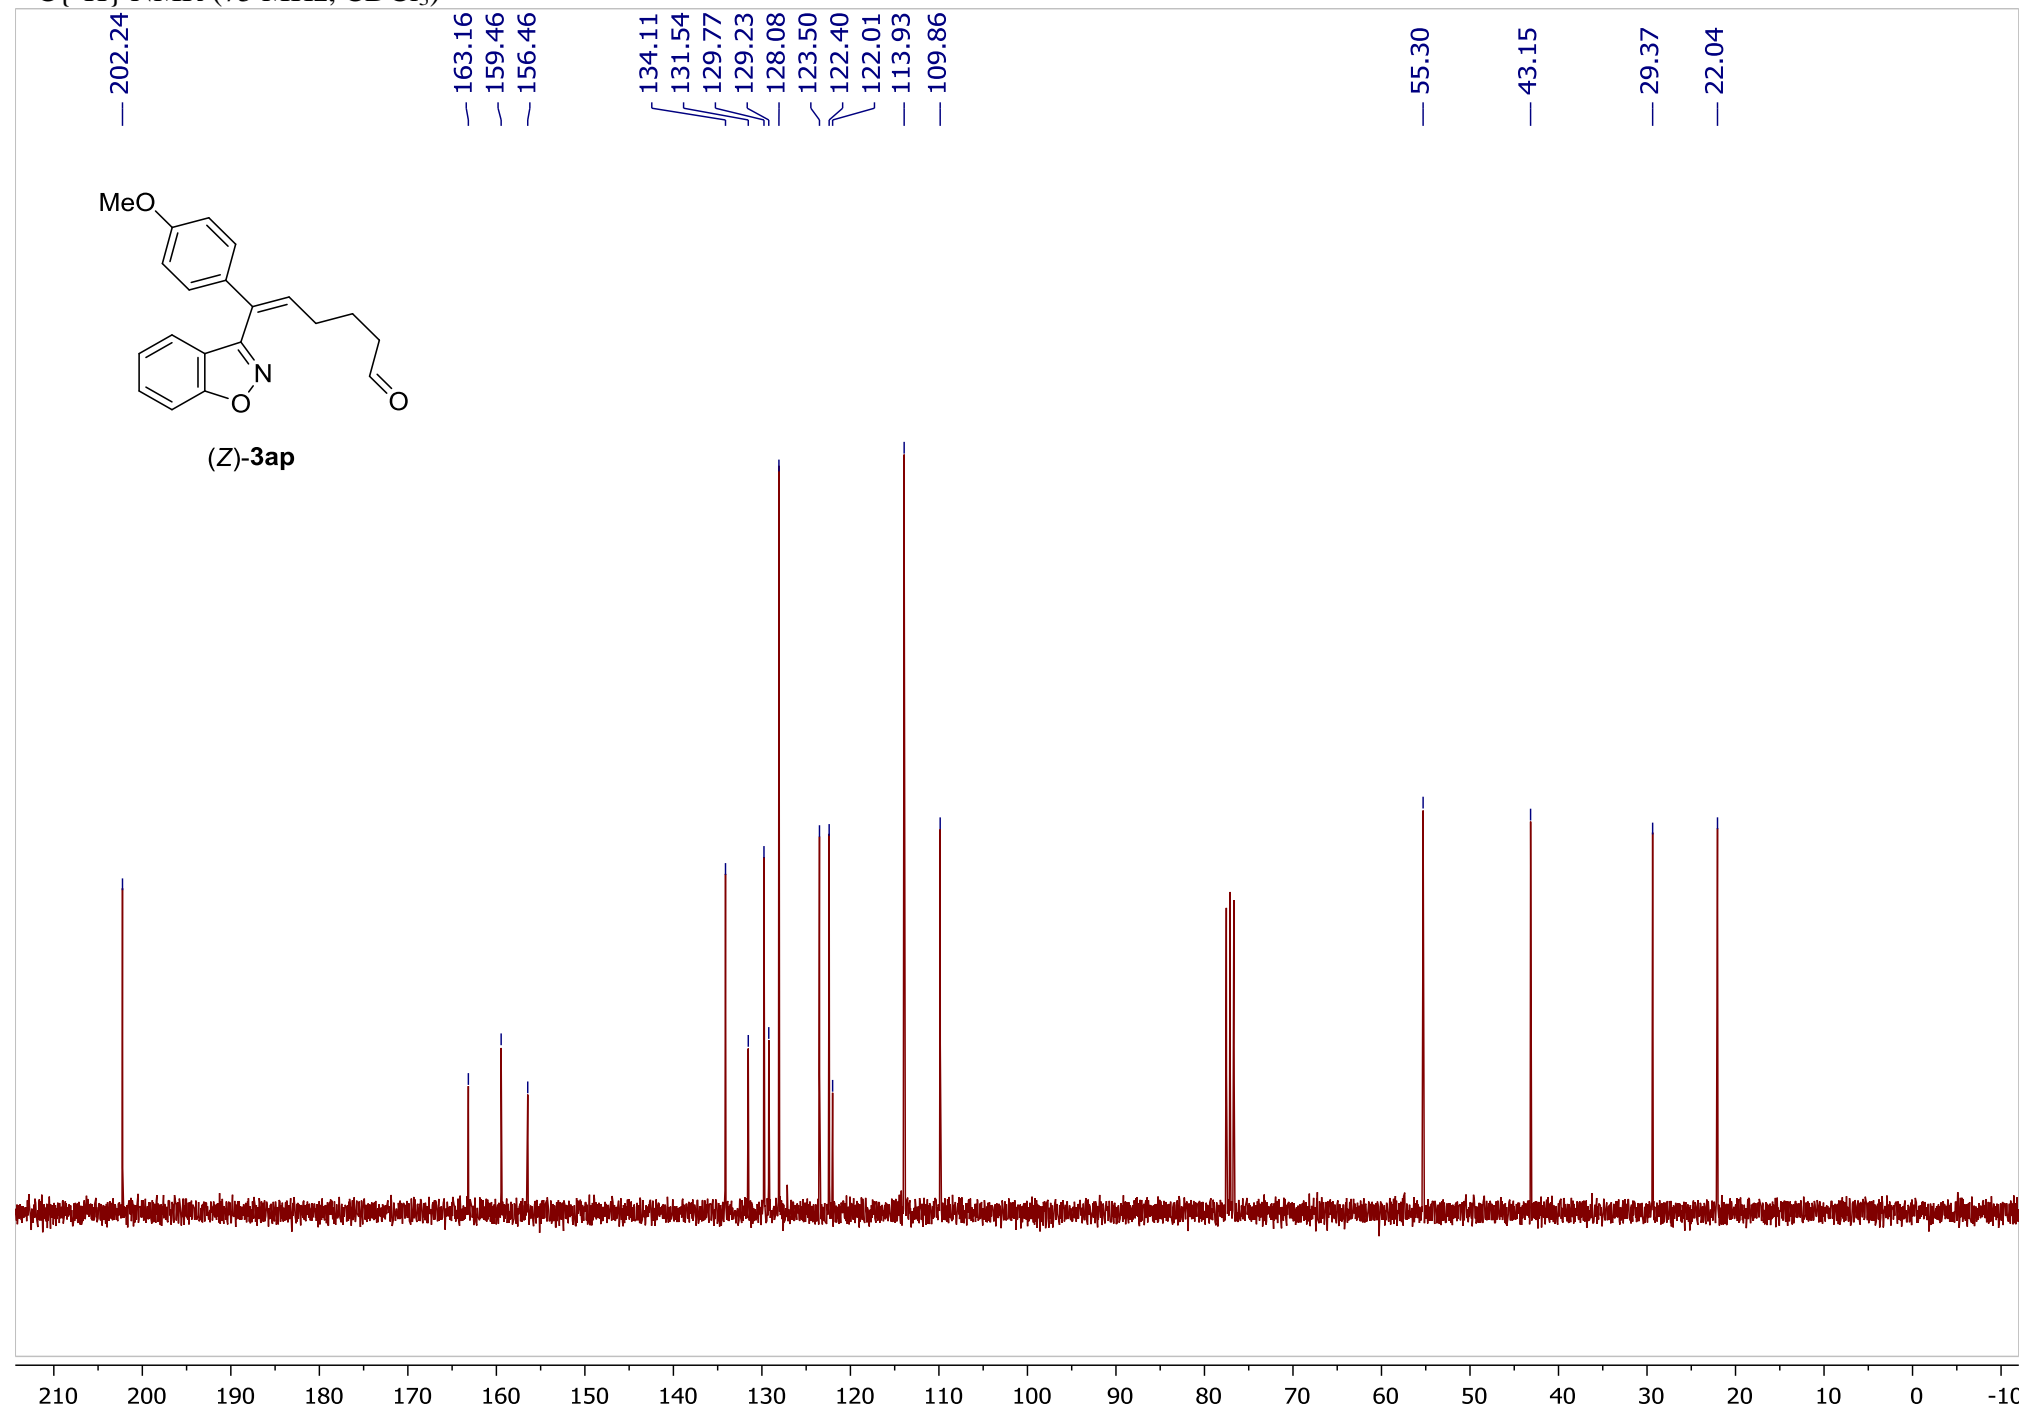

<sup>13</sup>C DEPT 135 (75 MHz, CDCl<sub>3</sub>)

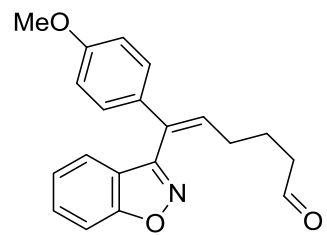

(Z)-3ap

134.12  
129.77  
128.08  
123.50  
122.40  
113.93  
109.86  
55.30  
43.16  
29.37  
22.04

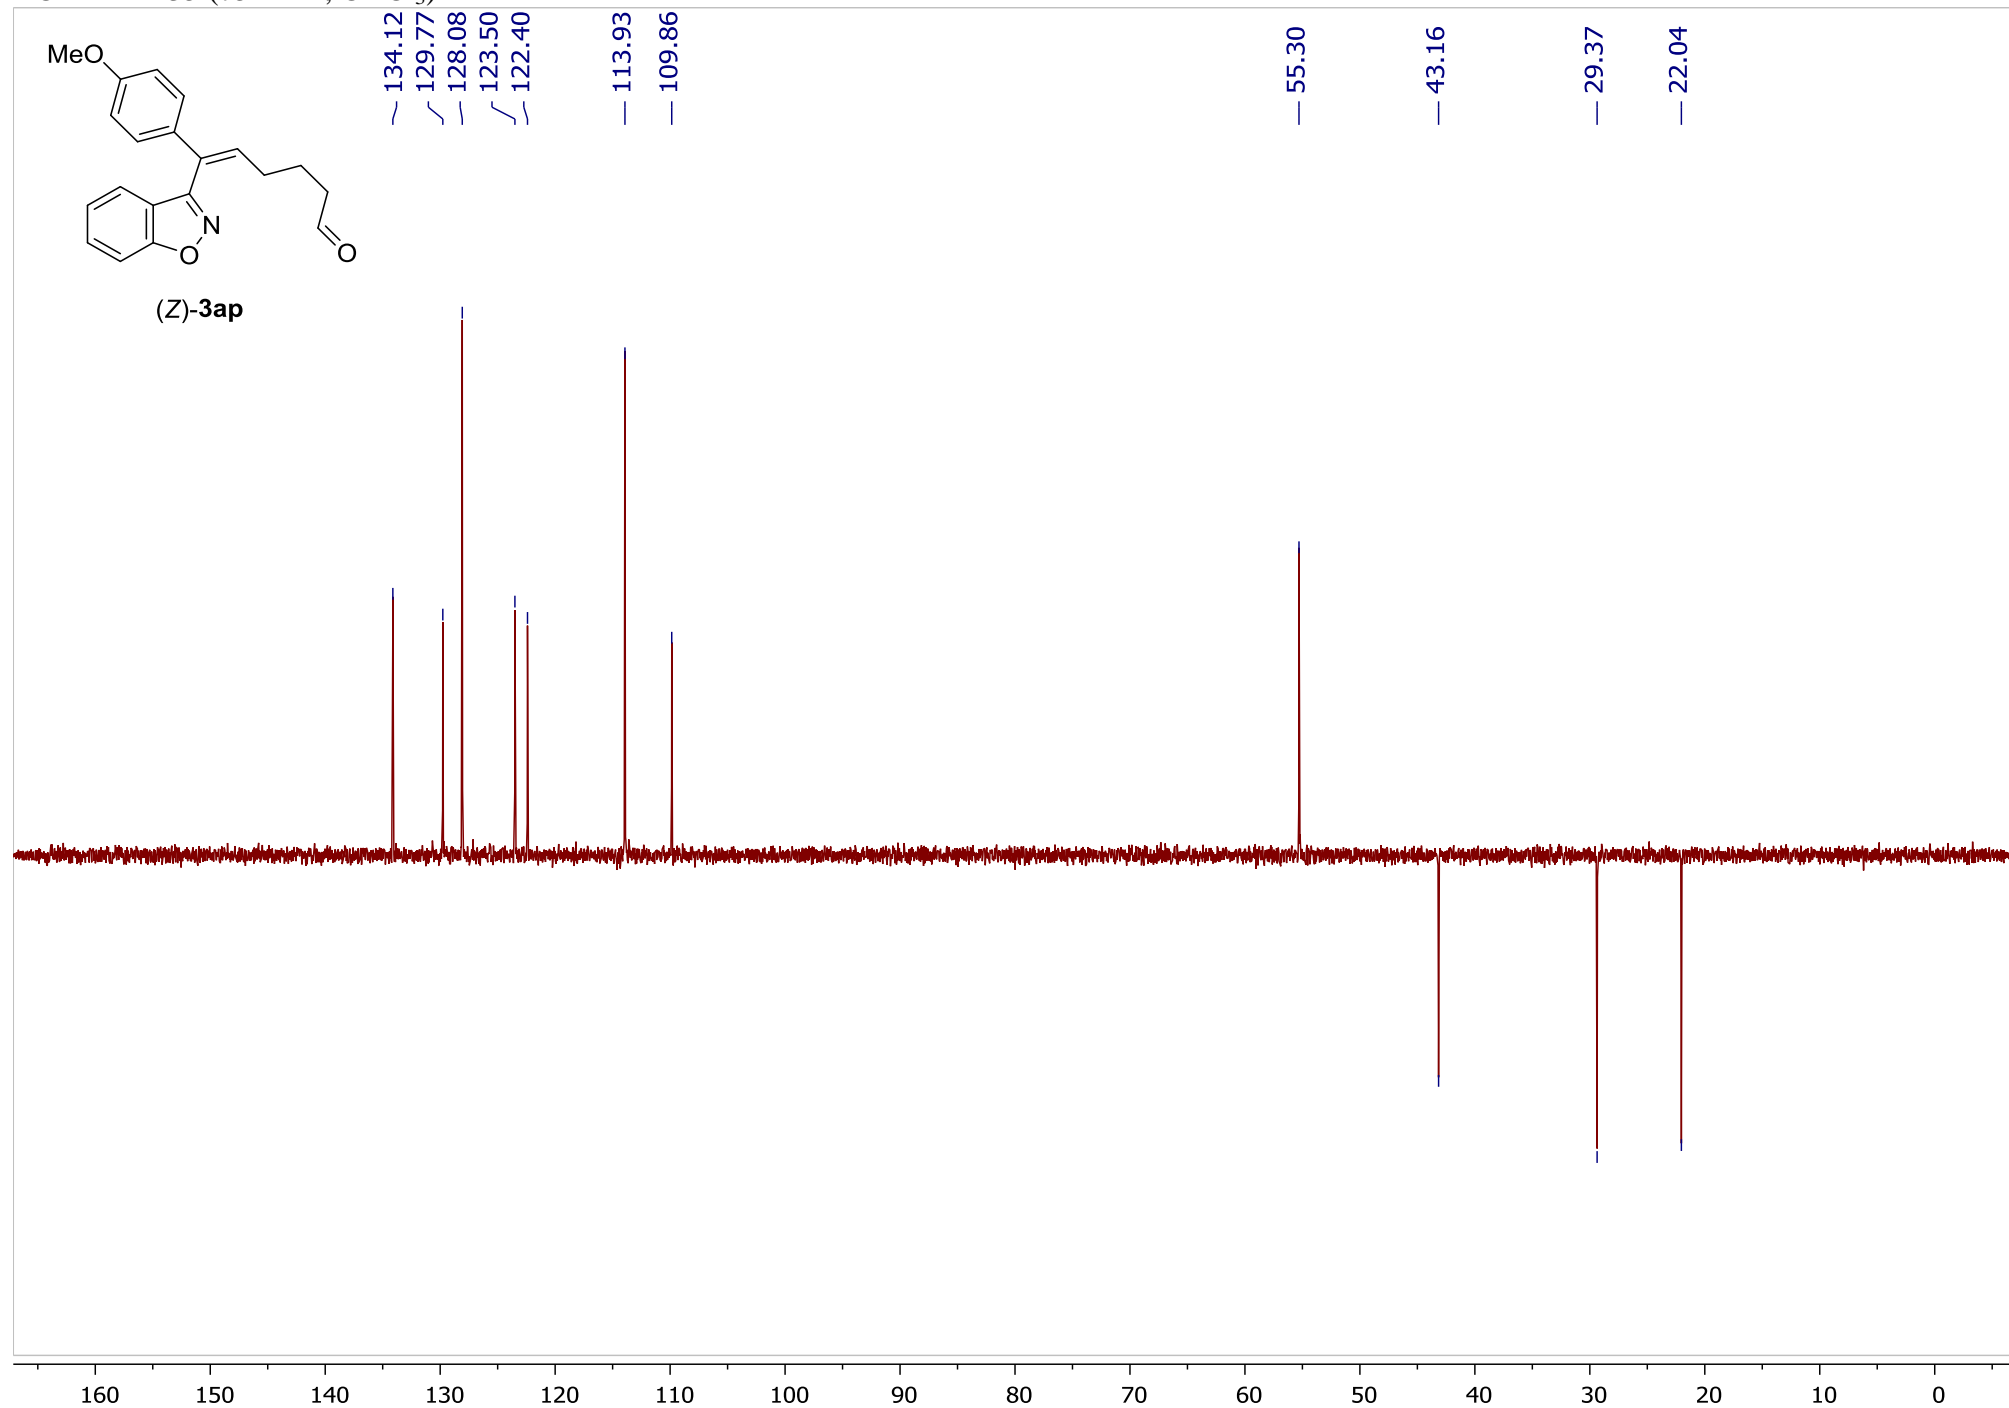

**6-(benzo[d]isoxazol-3-yl)-6-(4-methoxyphenyl)hex-5-enal 3ap, Z:E=1:1.7**

<sup>1</sup>H NMR (300 MHz, CDCl<sub>3</sub>)

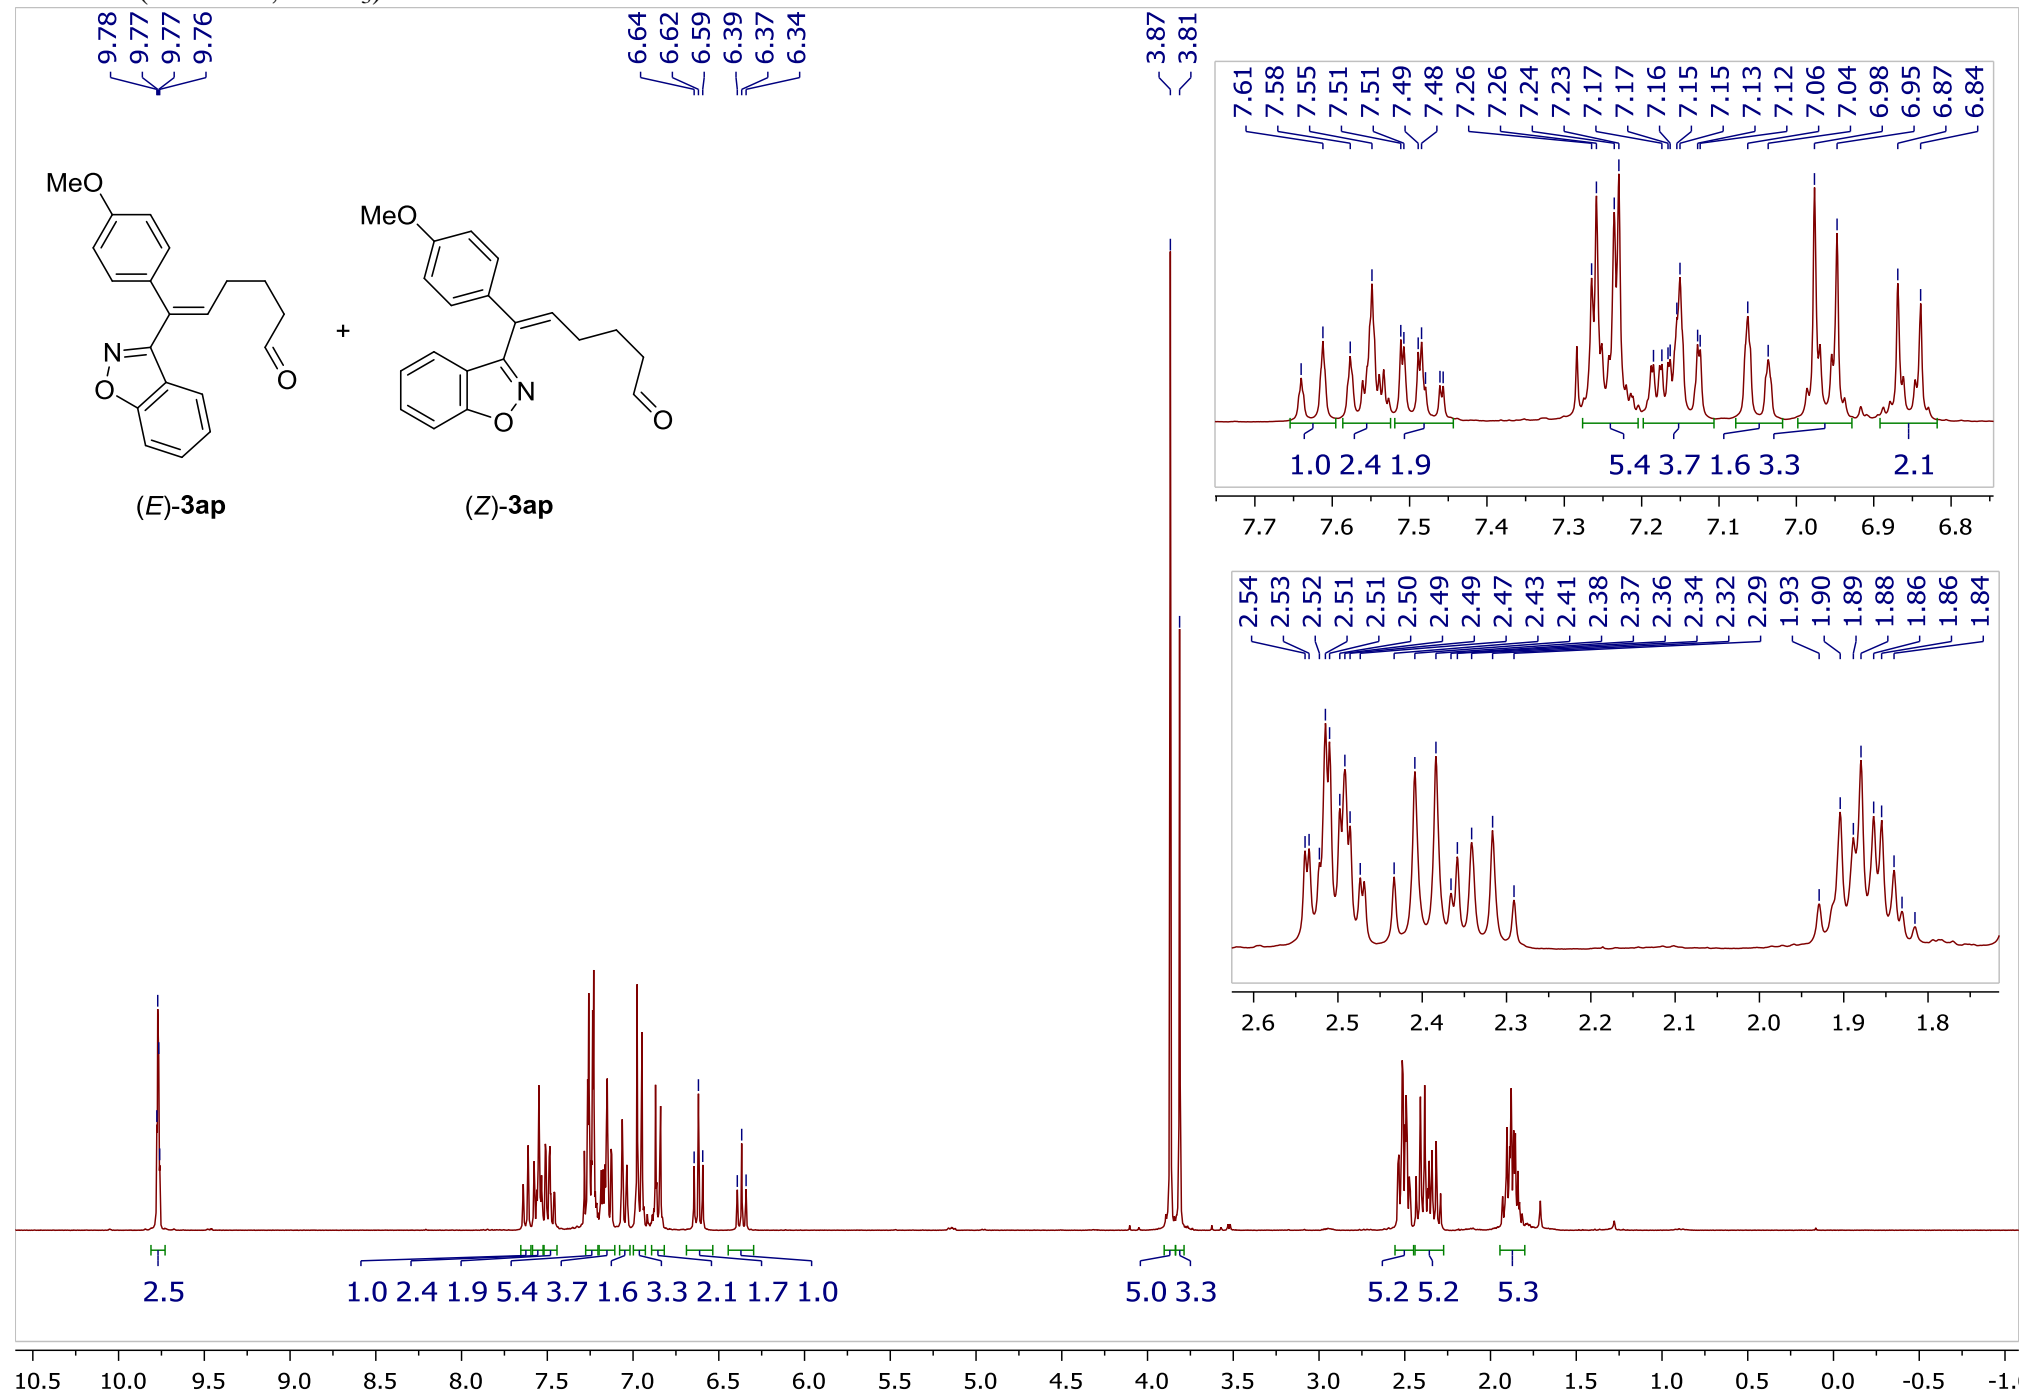



$^{13}\text{C}\{^1\text{H}\}$  NMR (75 MHz,  $\text{CDCl}_3$ )

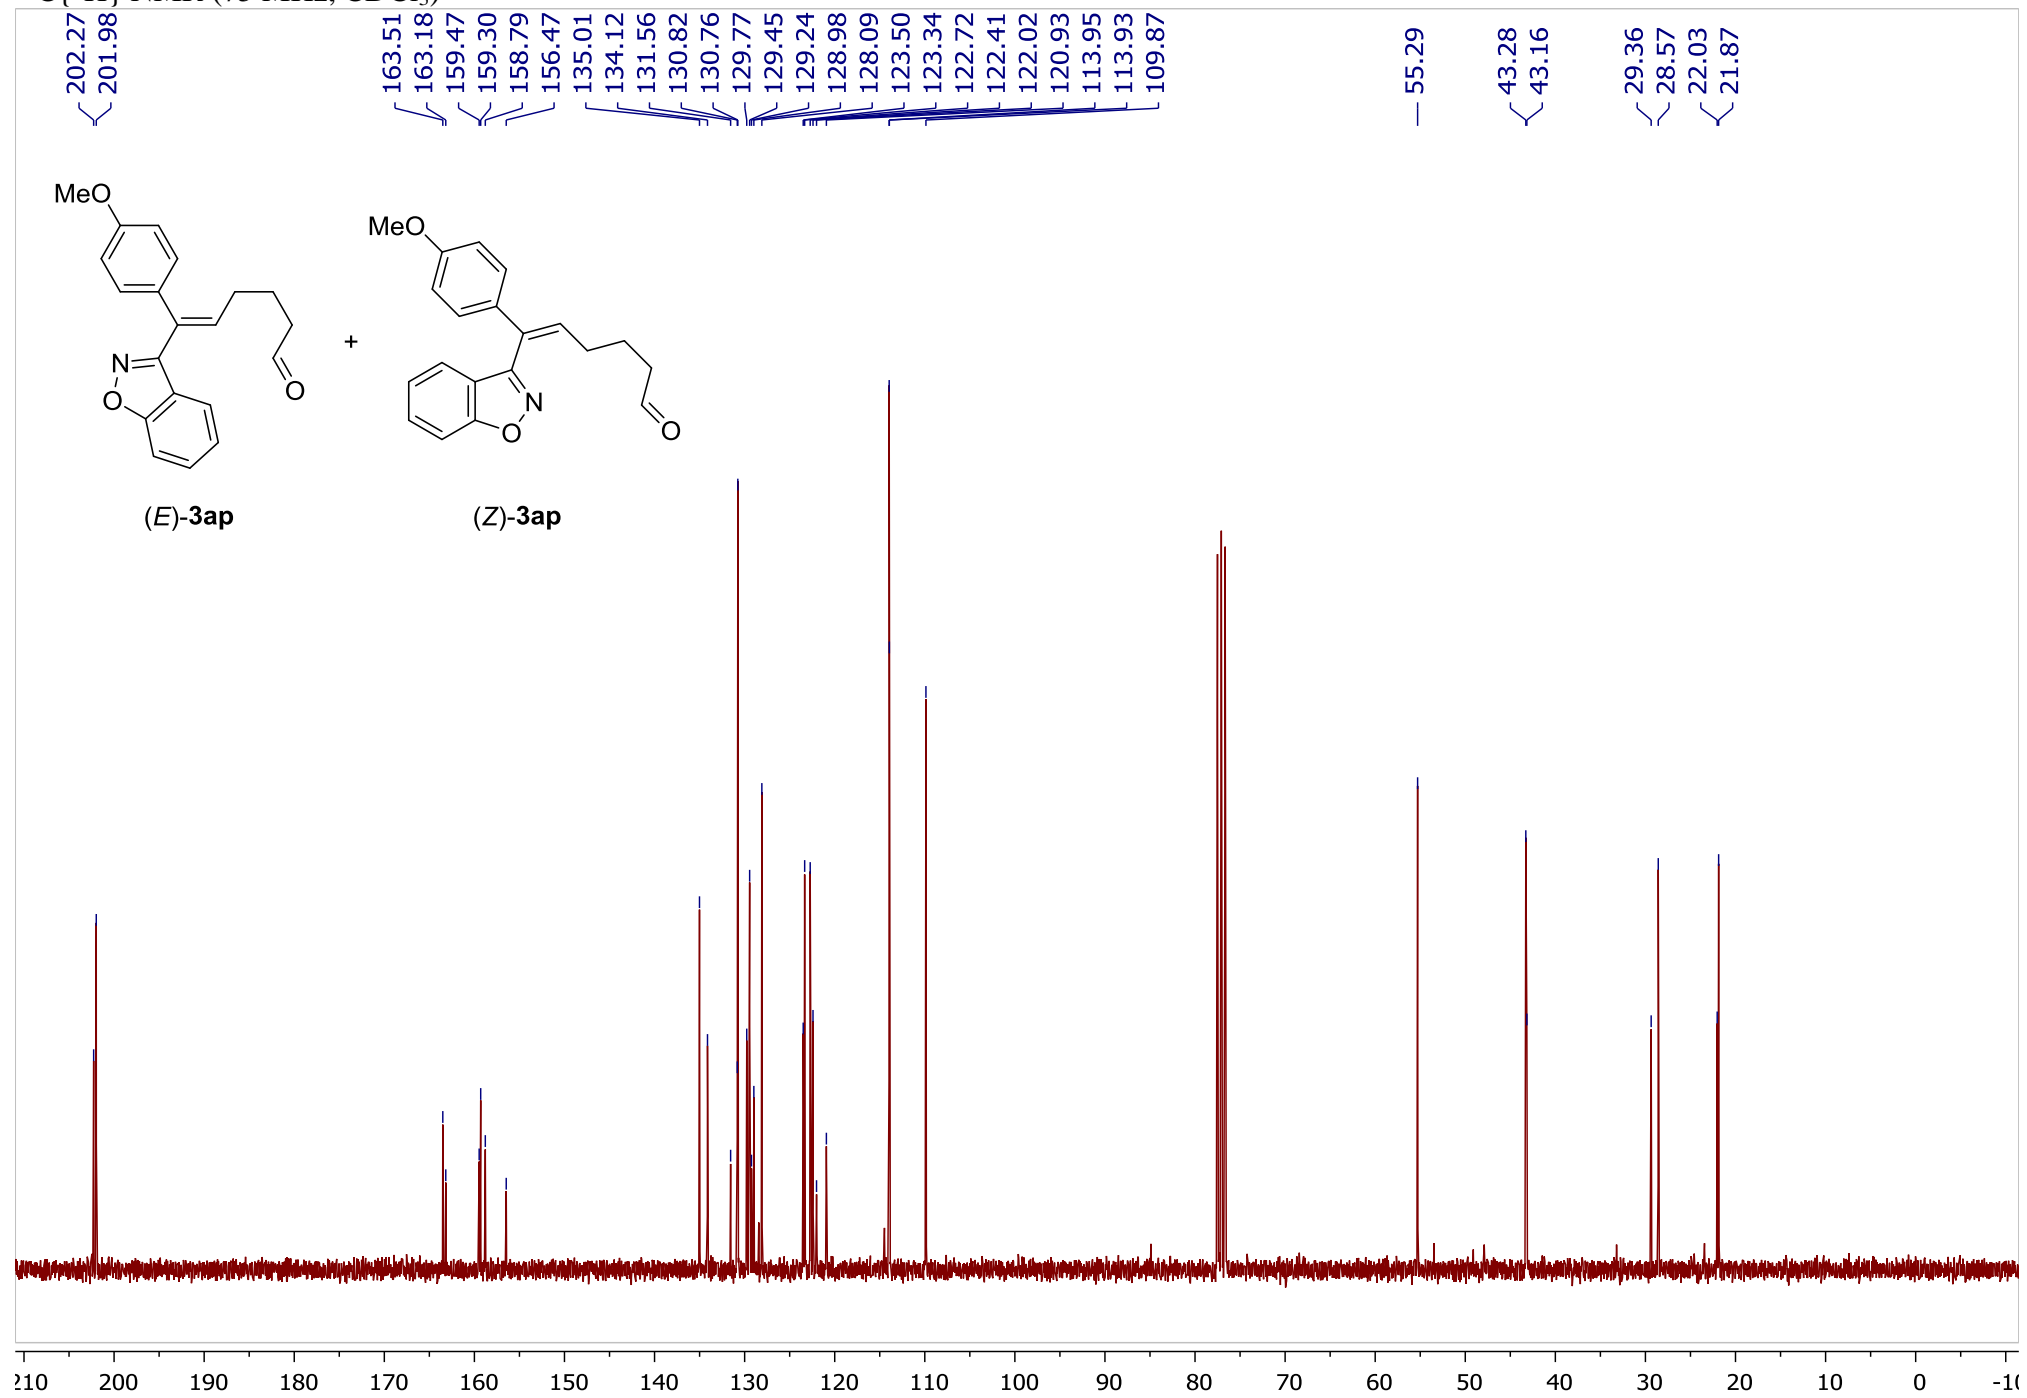

<sup>13</sup>C DEPT 135 (75 MHz, CDCl<sub>3</sub>)

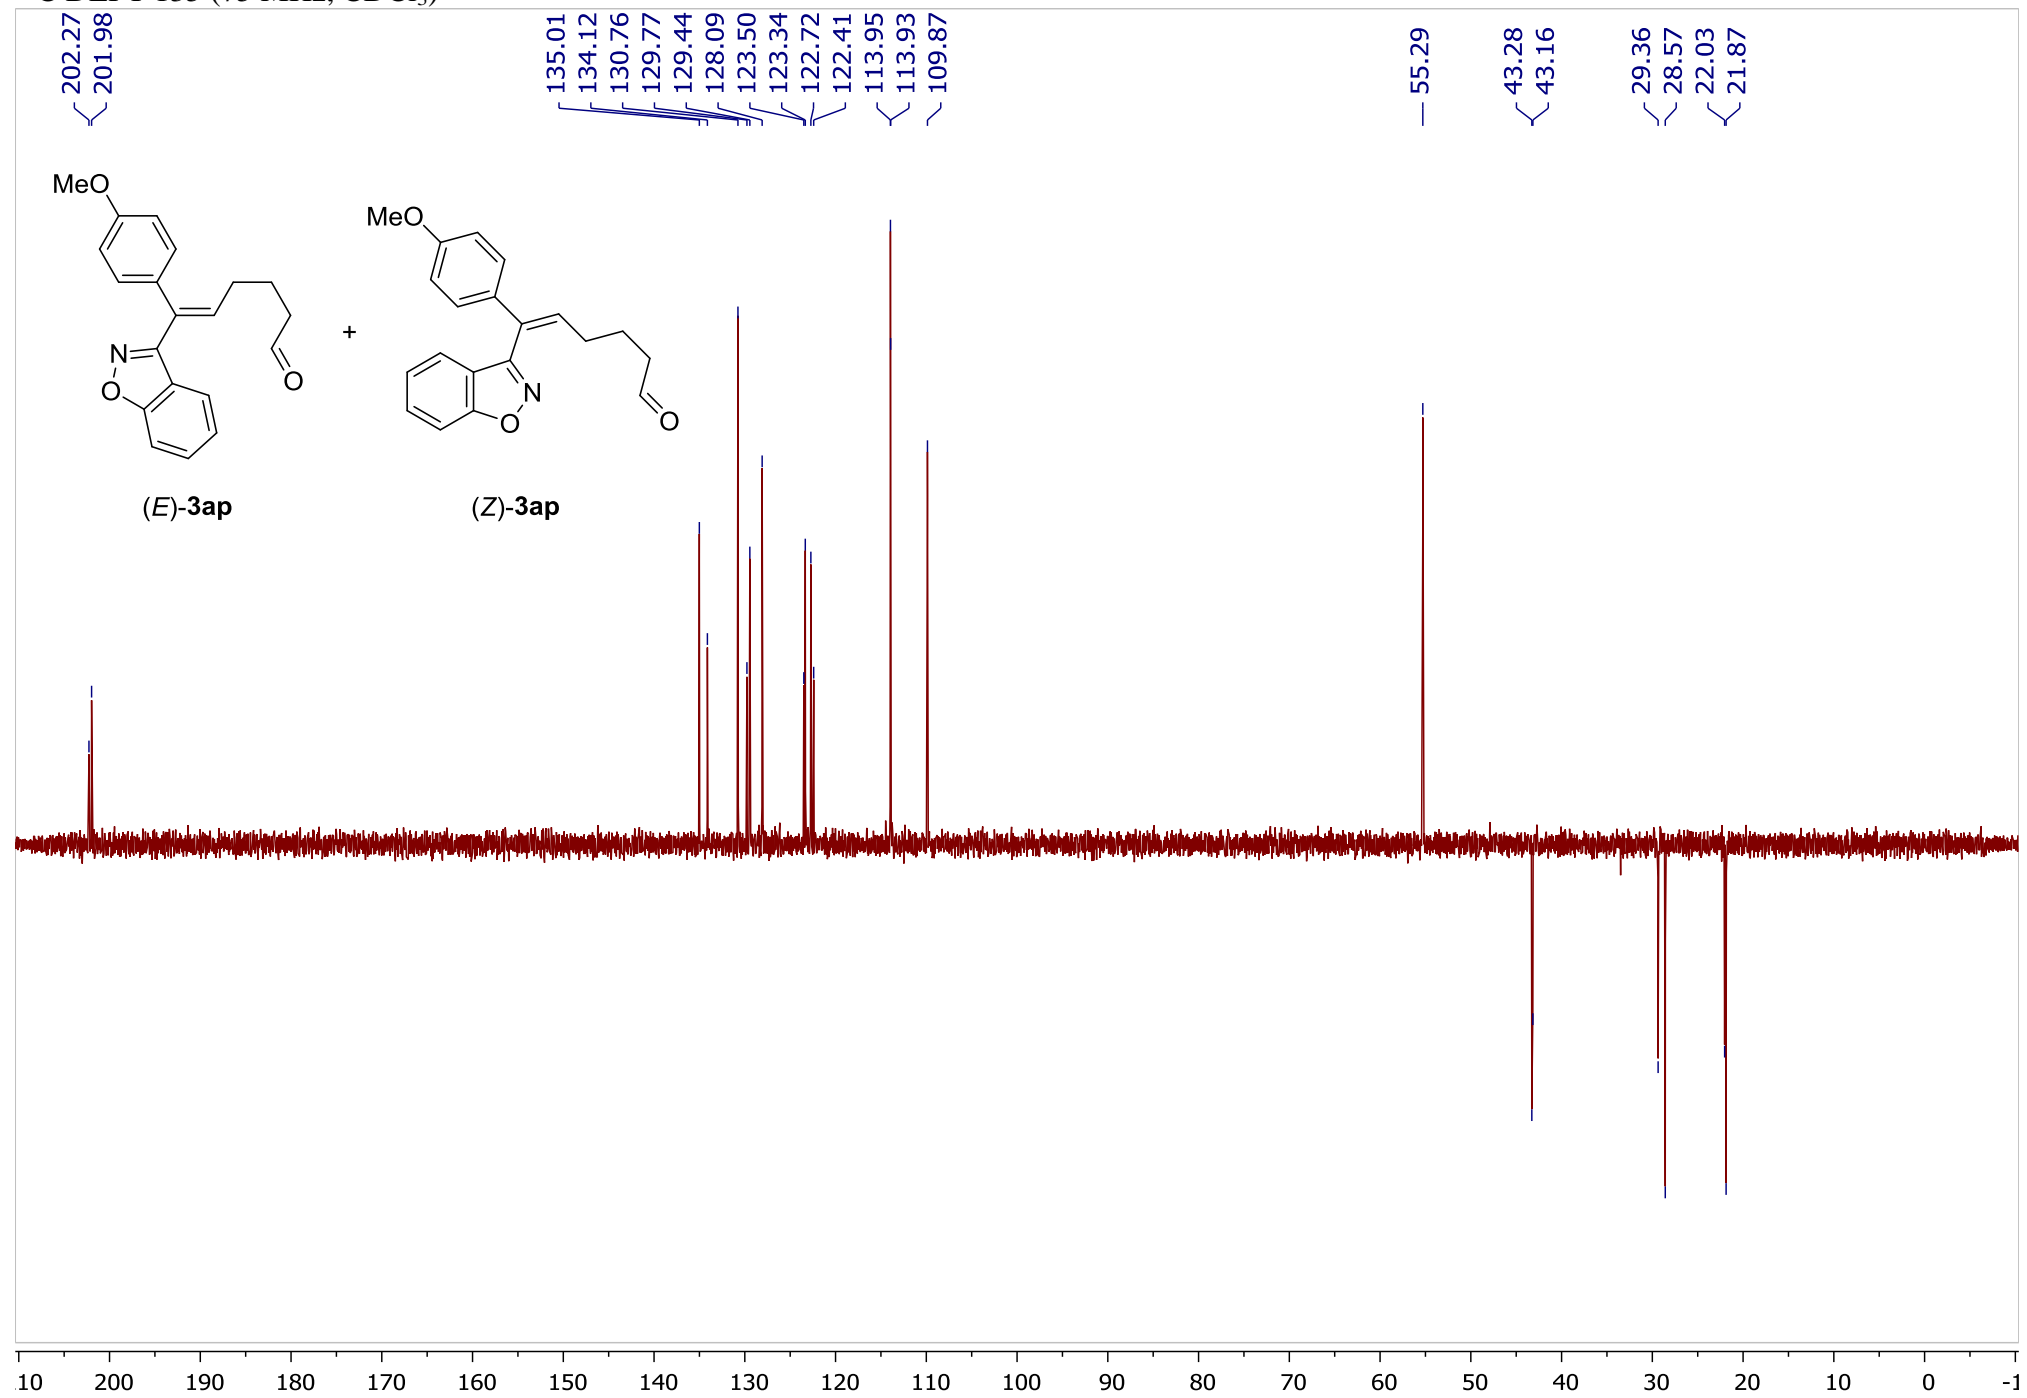

$^1\text{H}$ - $^1\text{H}$  COSY

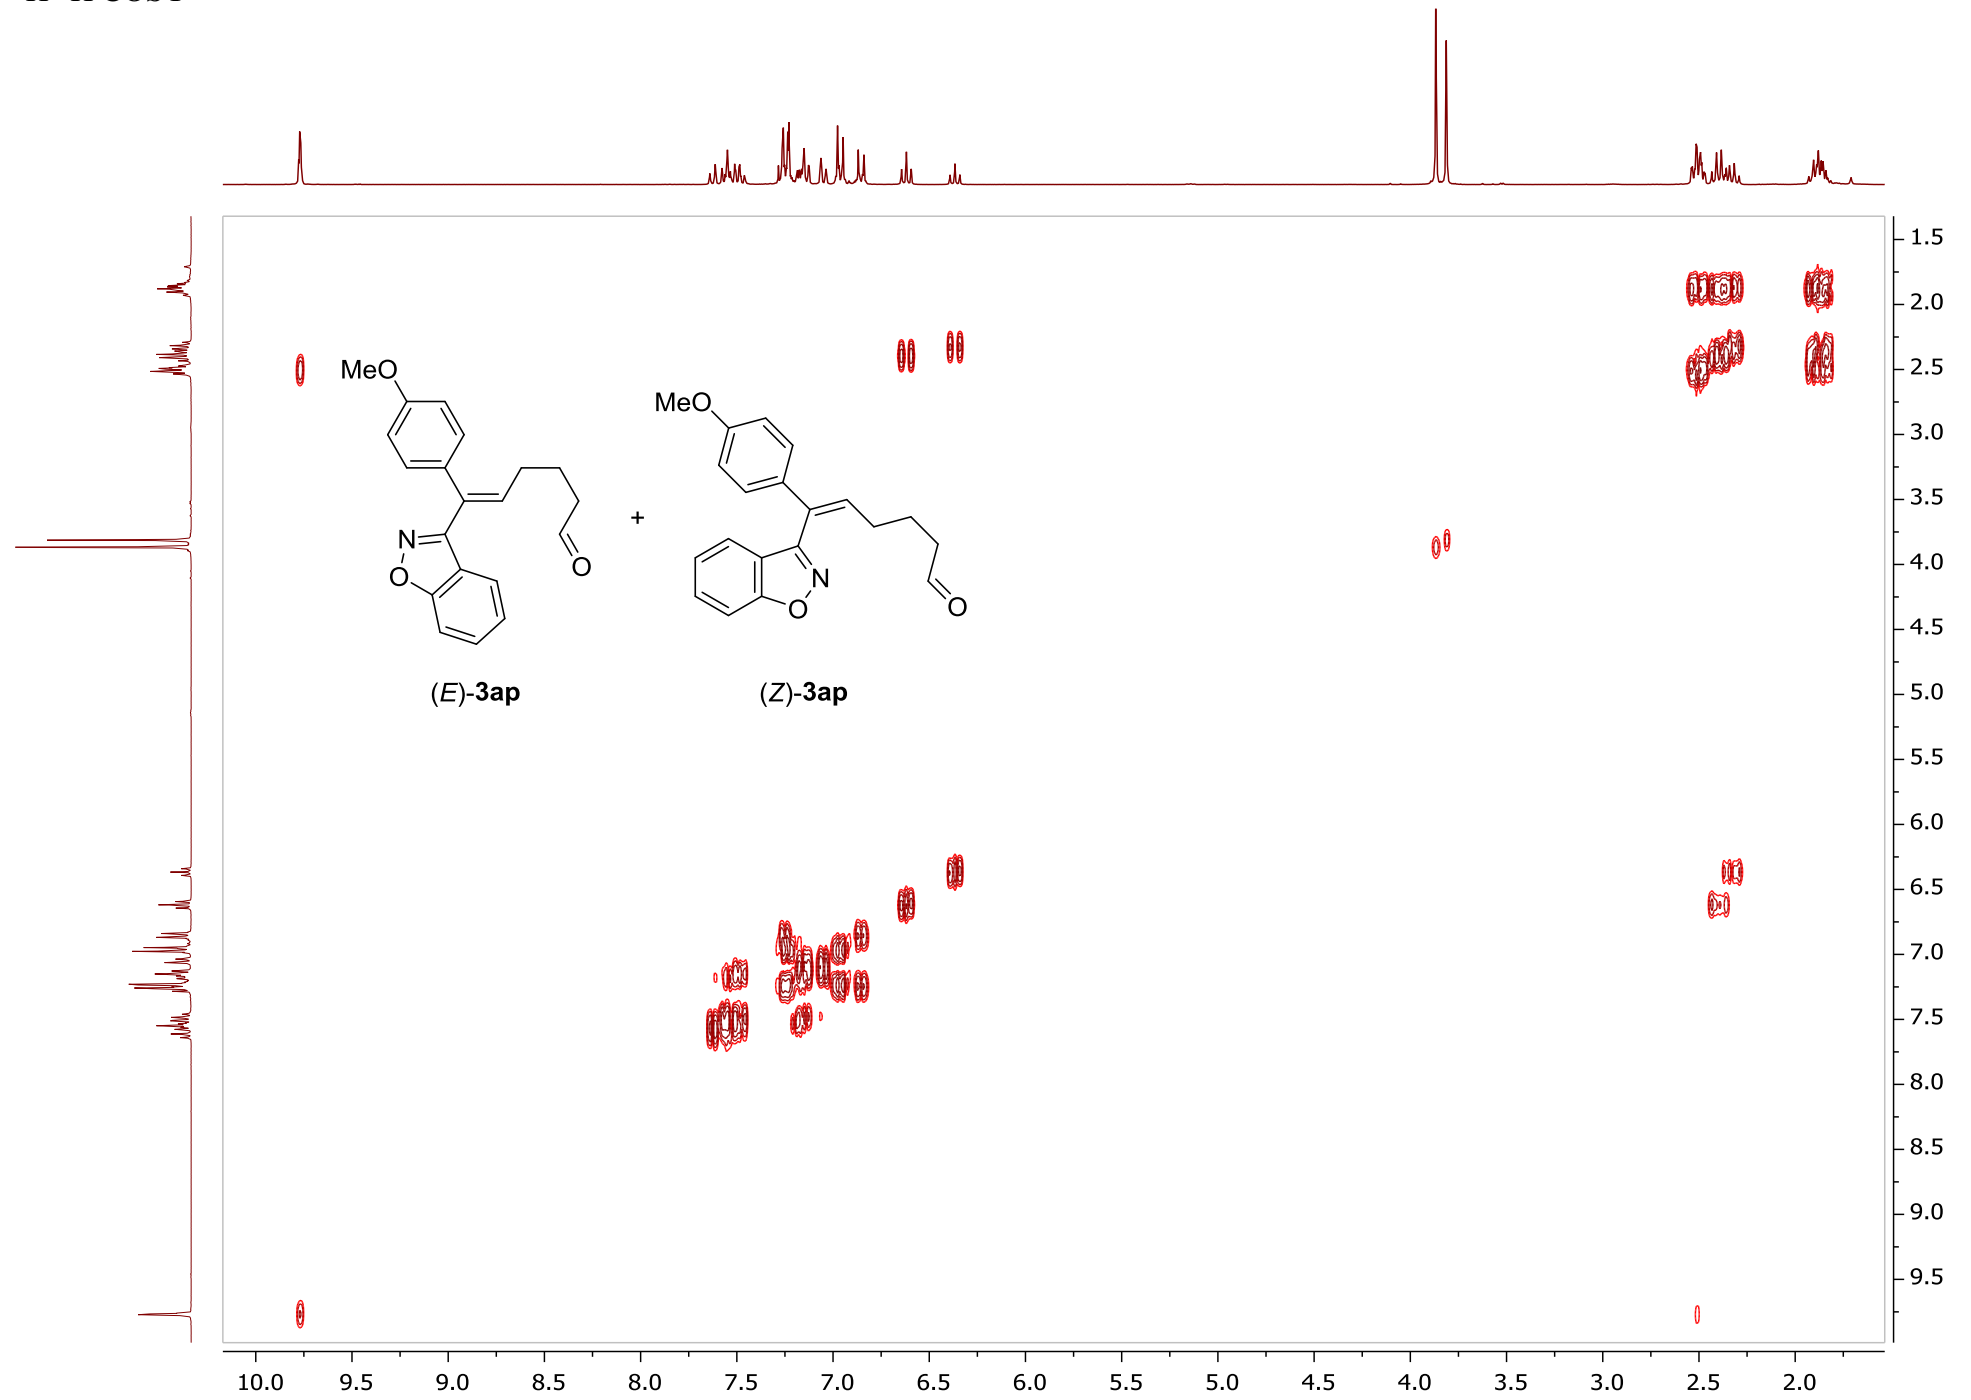

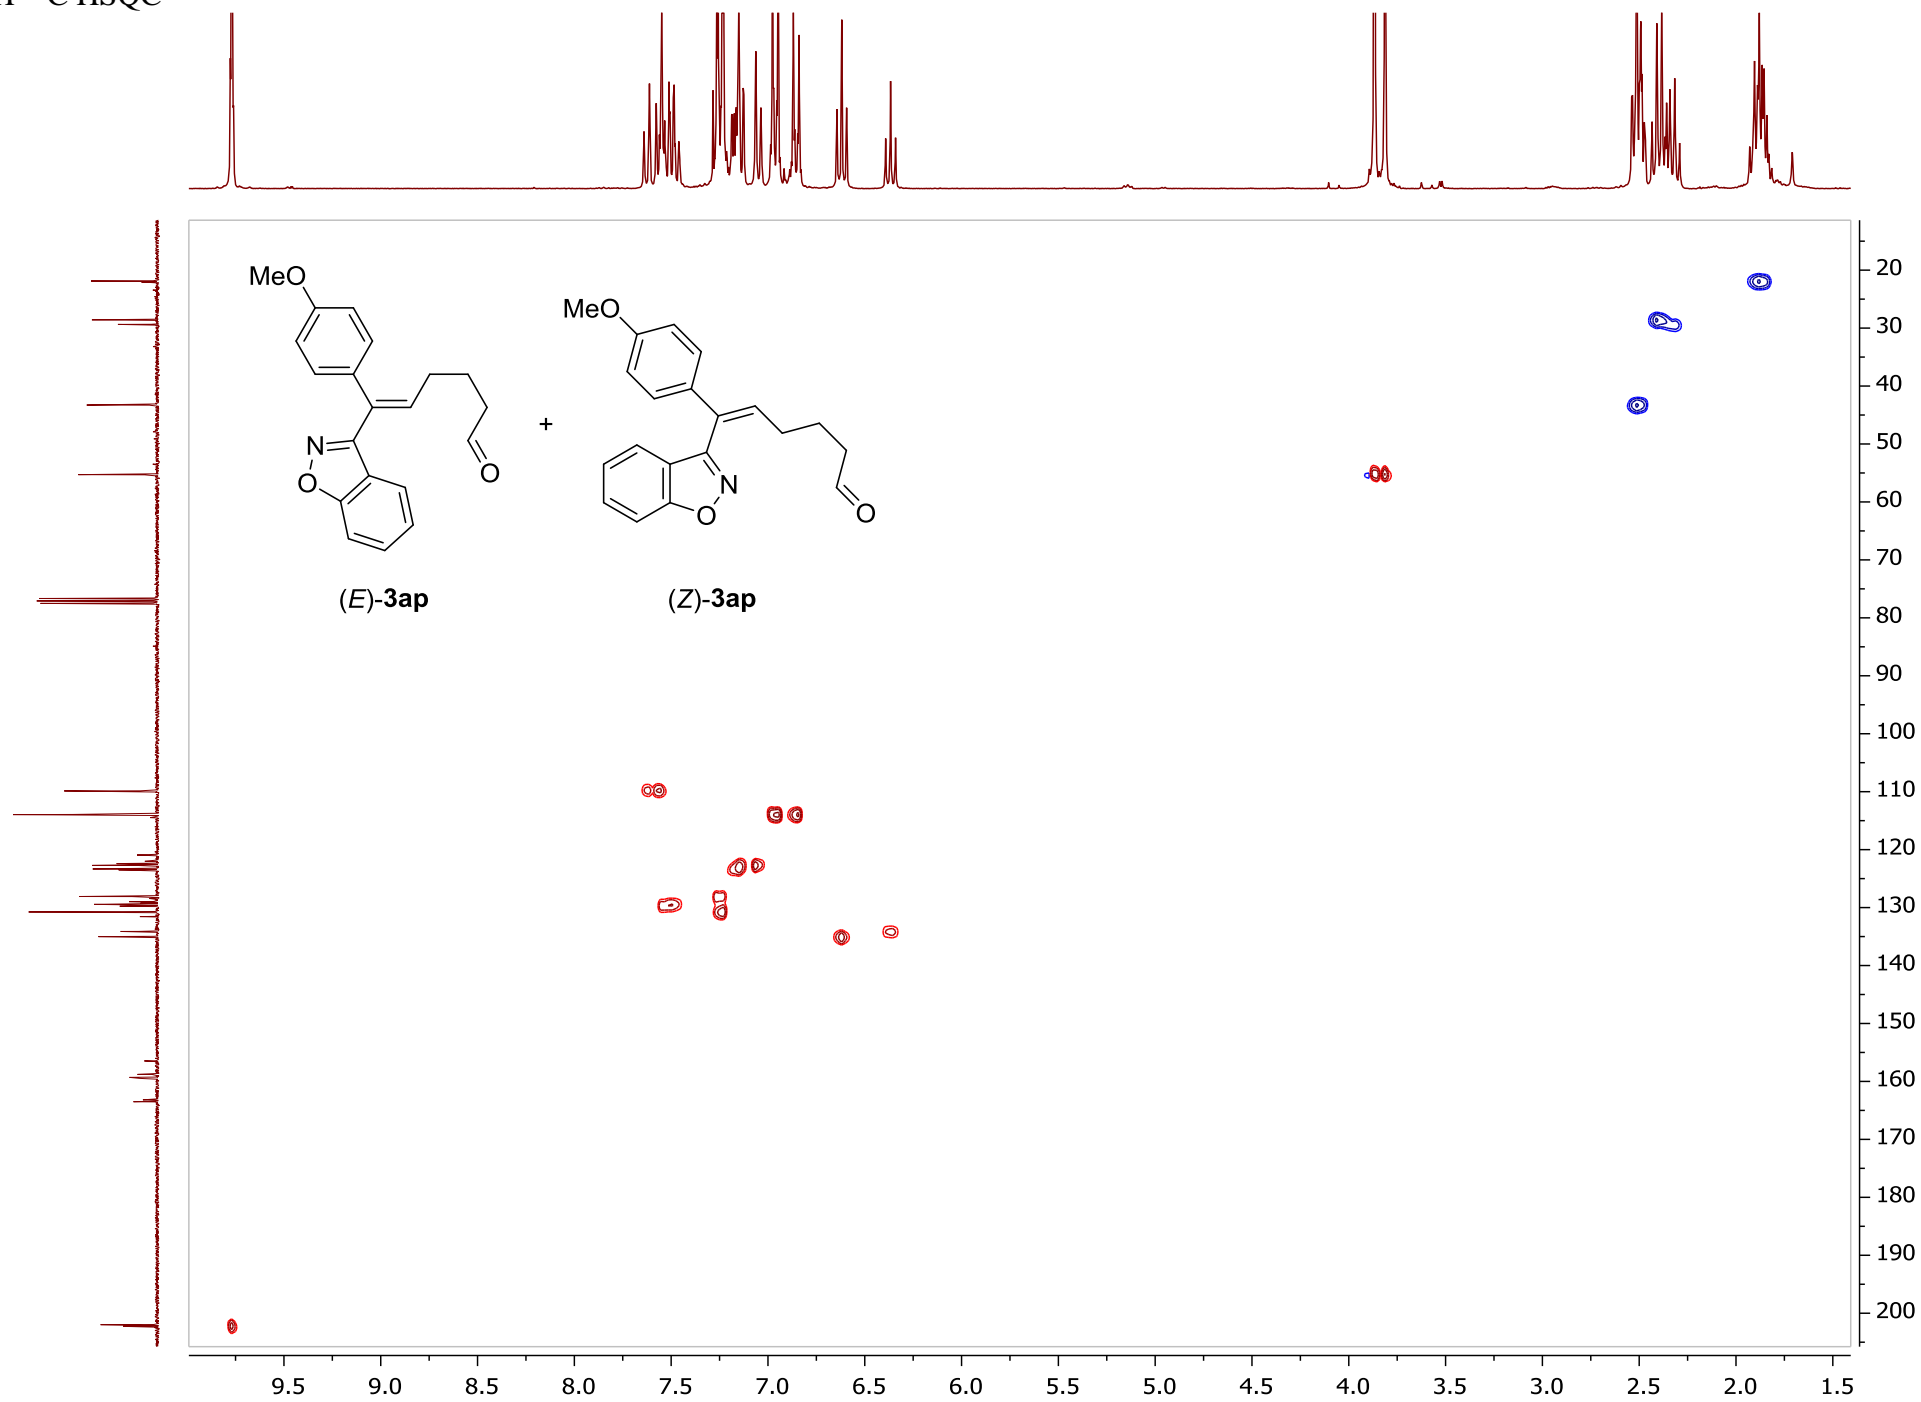

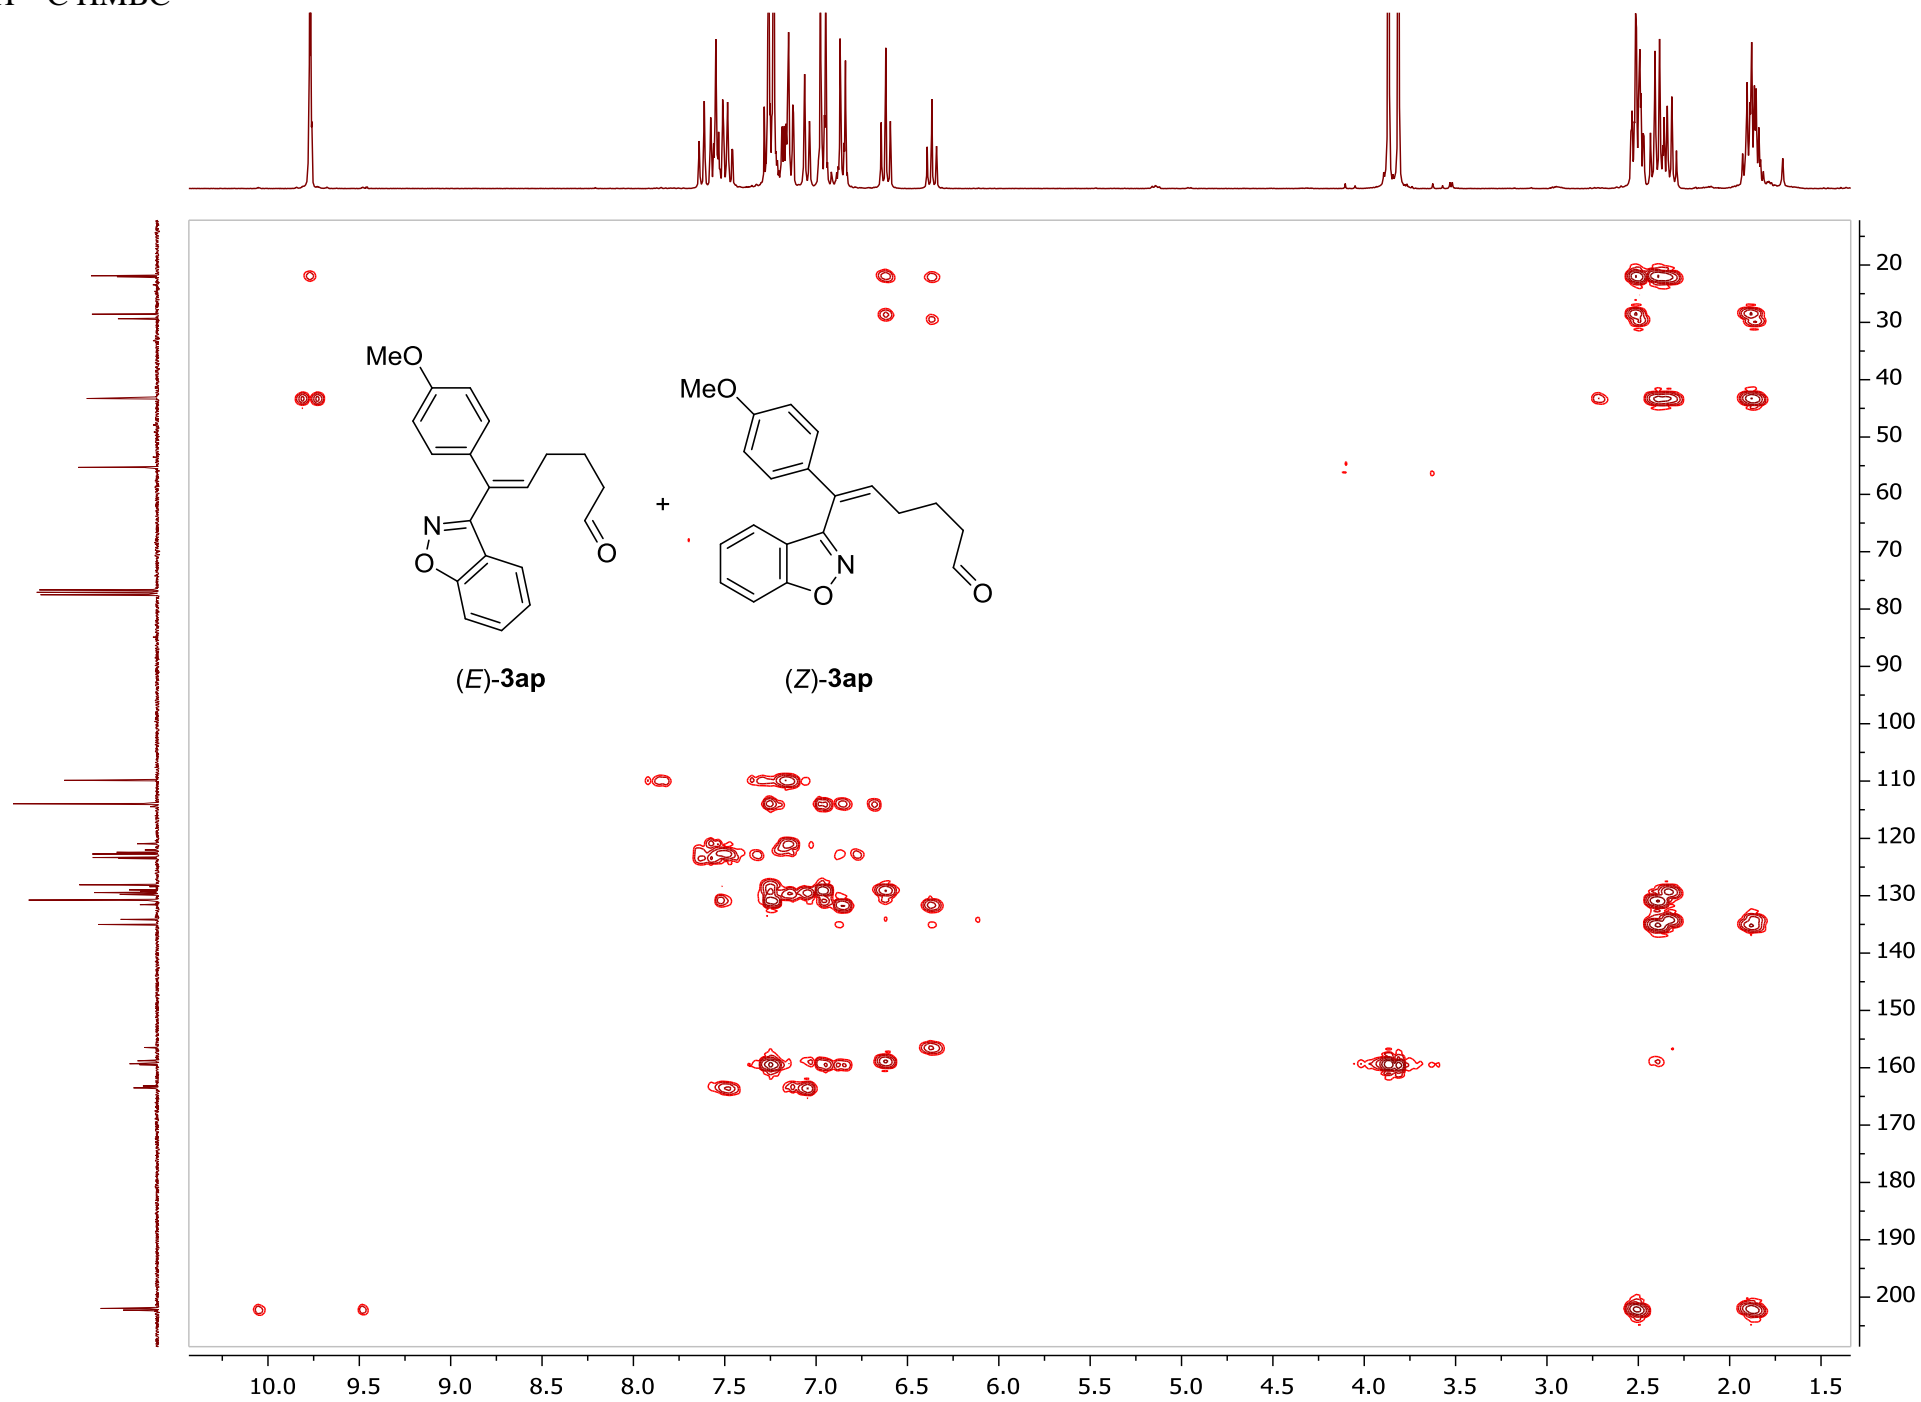

$^1\text{H}$ - $^1\text{H}$  NOESY

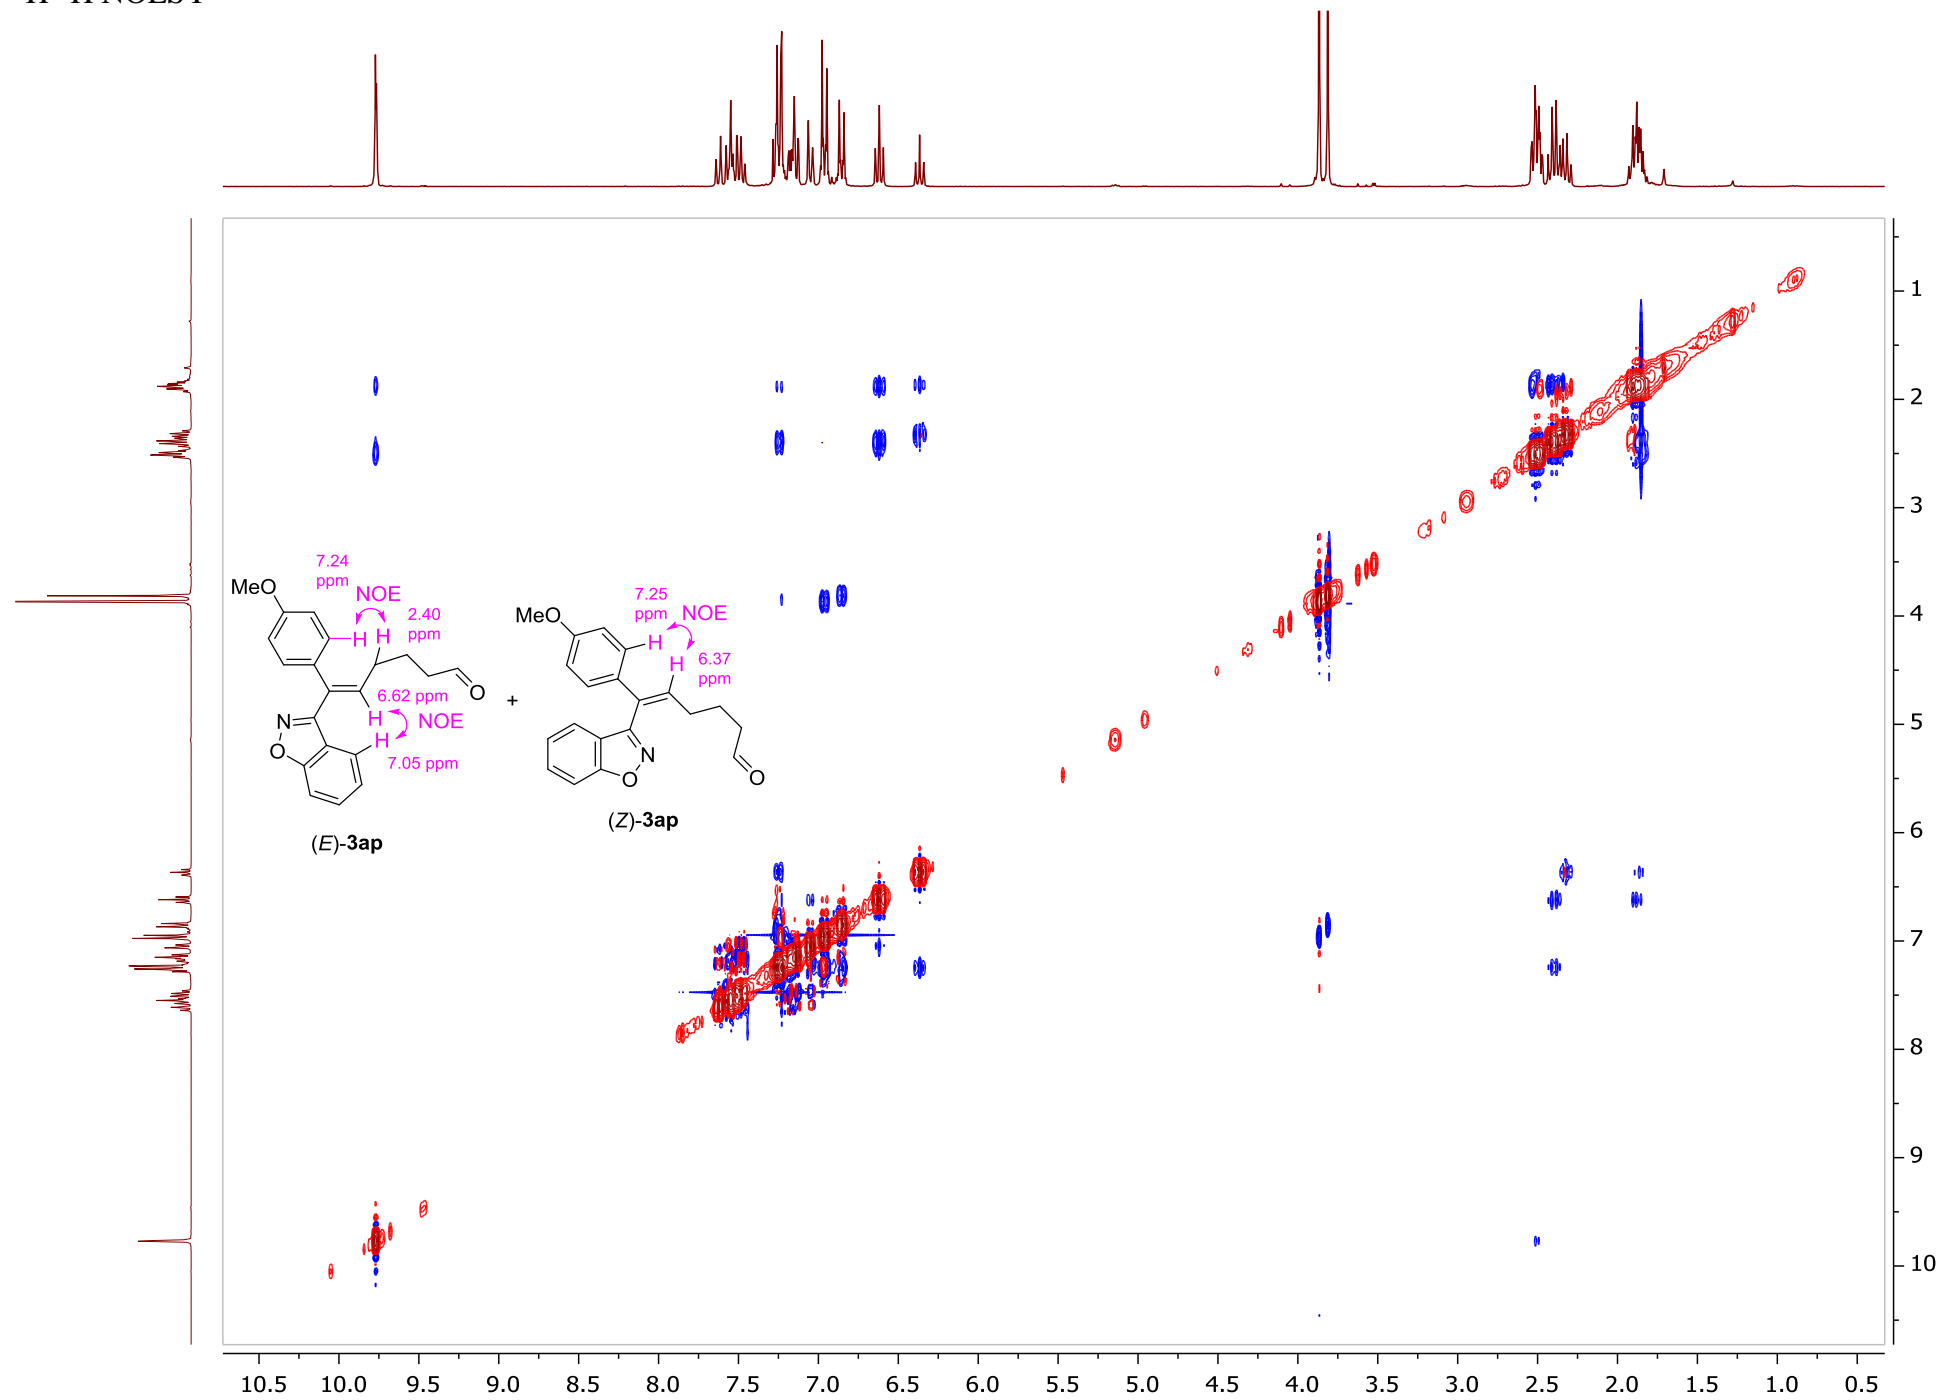

**(Z)-7-(Benzo[d]isoxazol-3-yl)-7-(4-methoxyphenyl)hept-6-enal 3aq**

<sup>1</sup>H NMR (300 MHz, CDCl<sub>3</sub>)

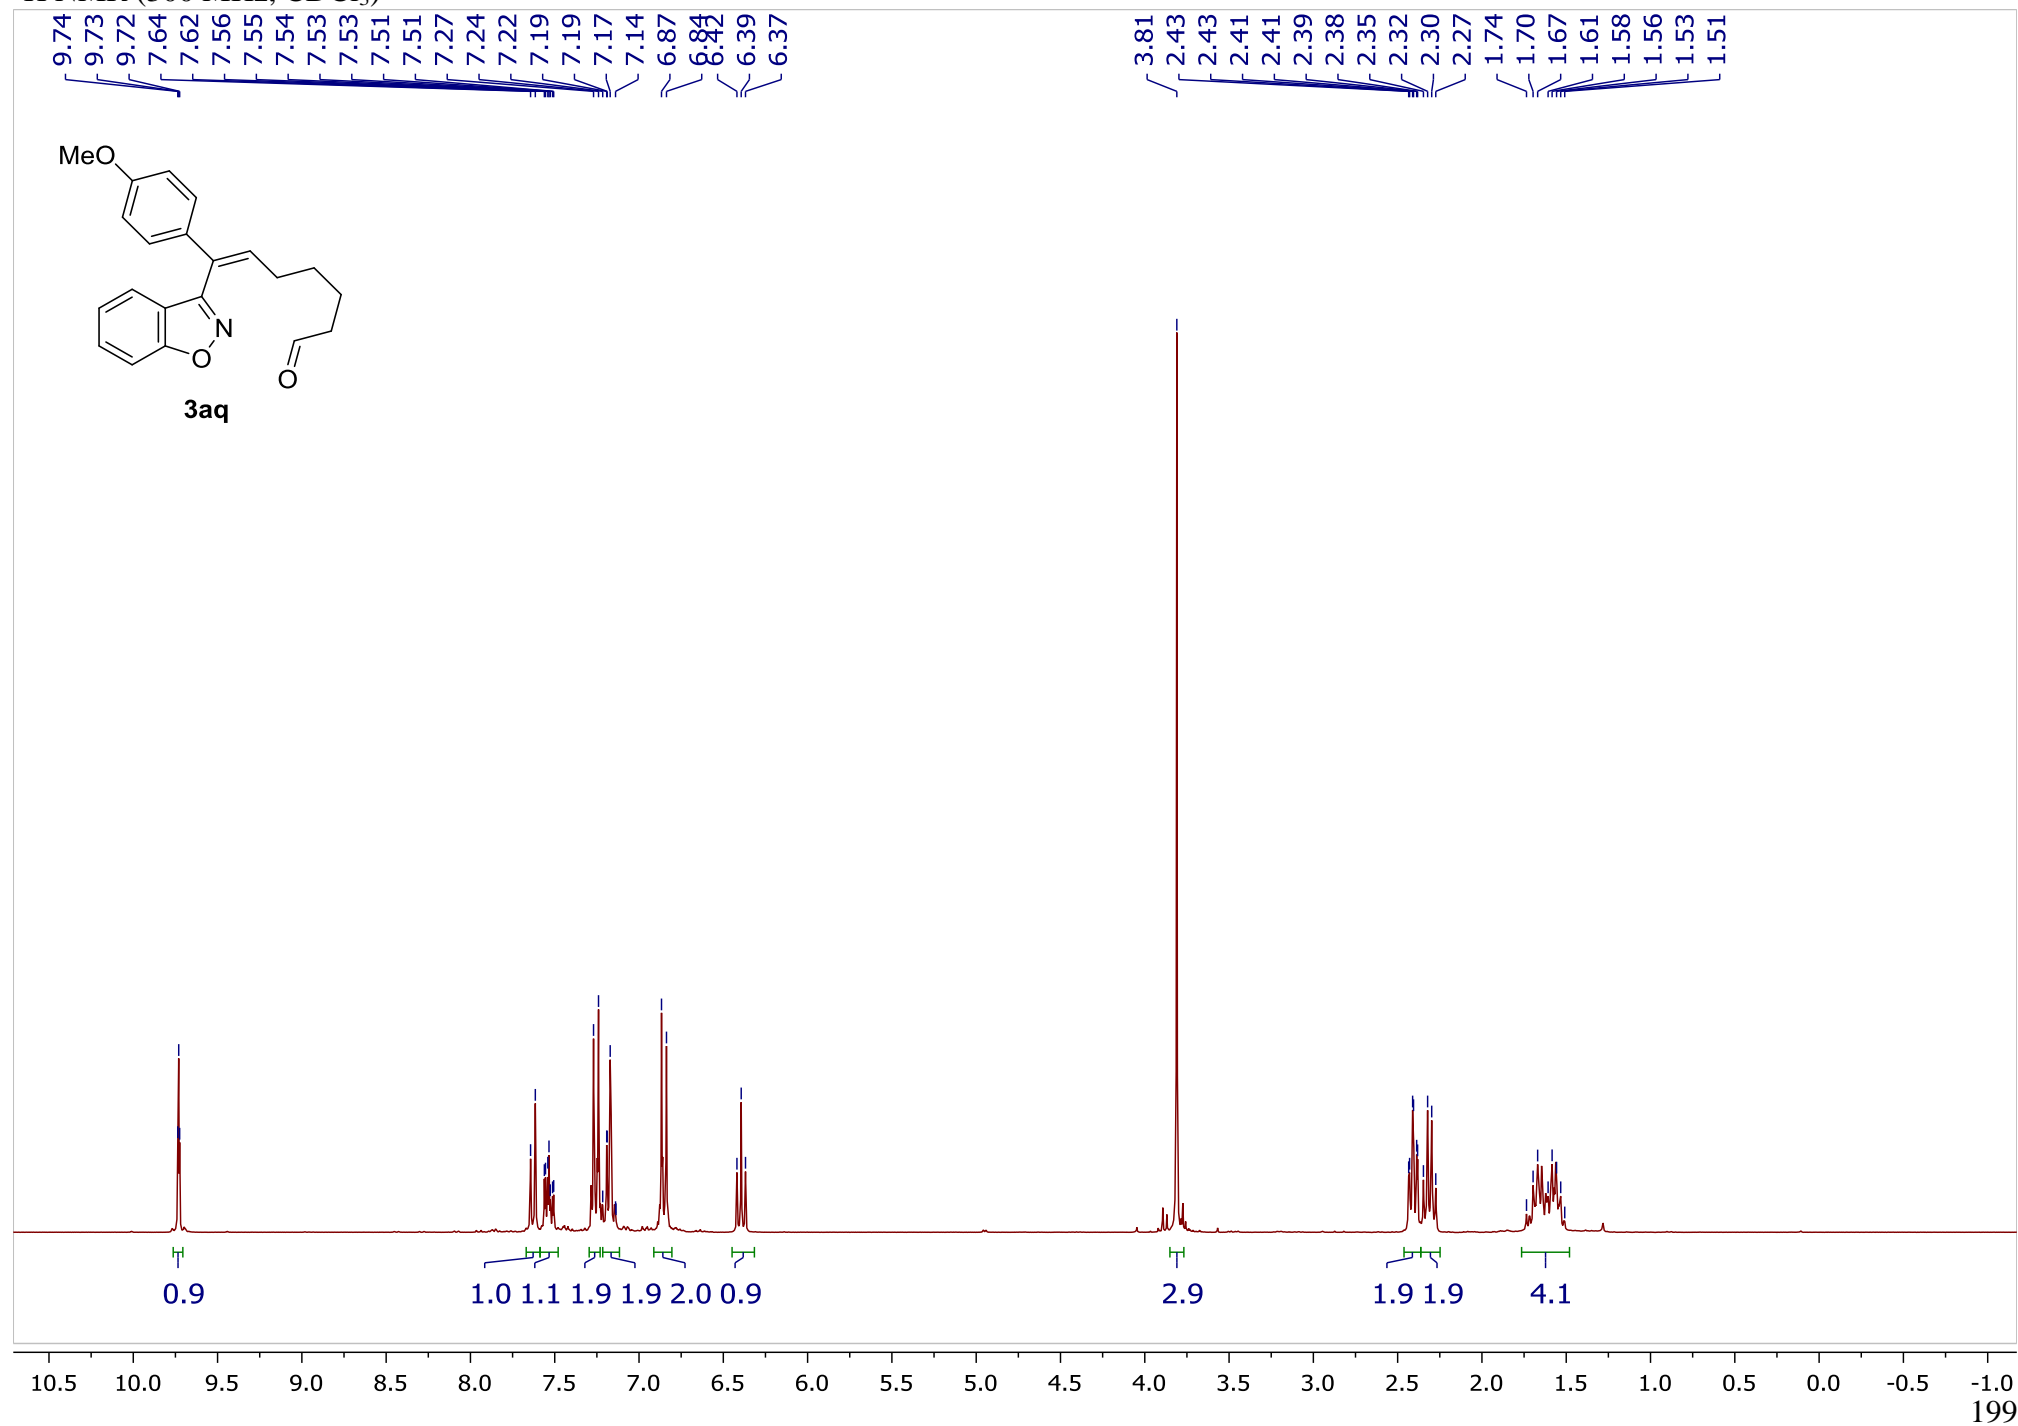

$^{13}\text{C}\{^1\text{H}\}$  NMR (75 MHz,  $\text{CDCl}_3$ )

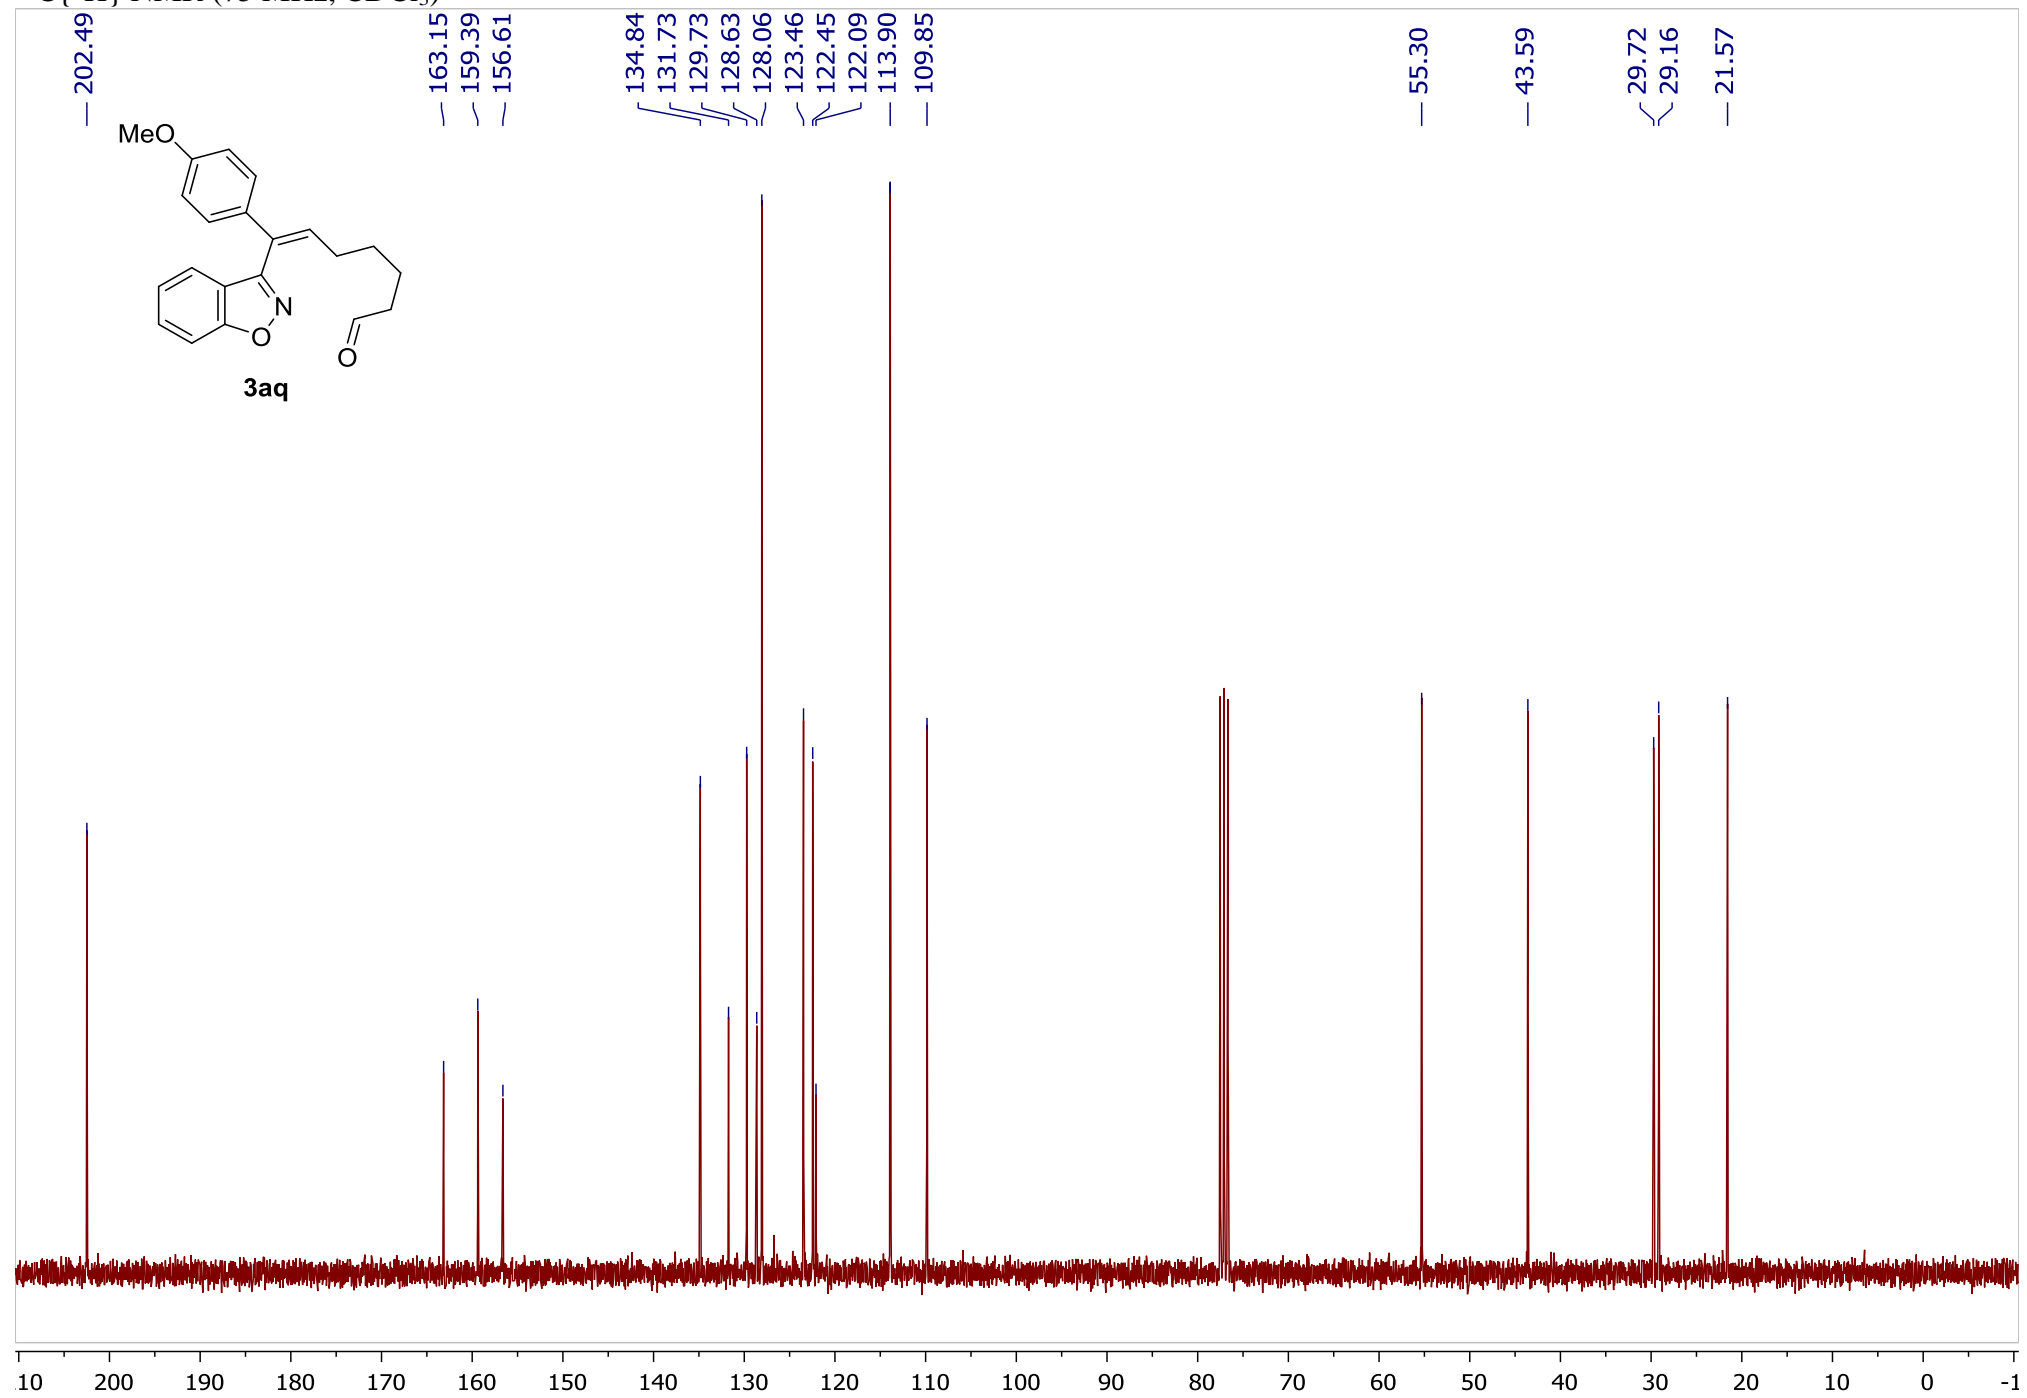



$^{13}\text{C}$  DEPT 135 (75 MHz,  $\text{CDCl}_3$ )

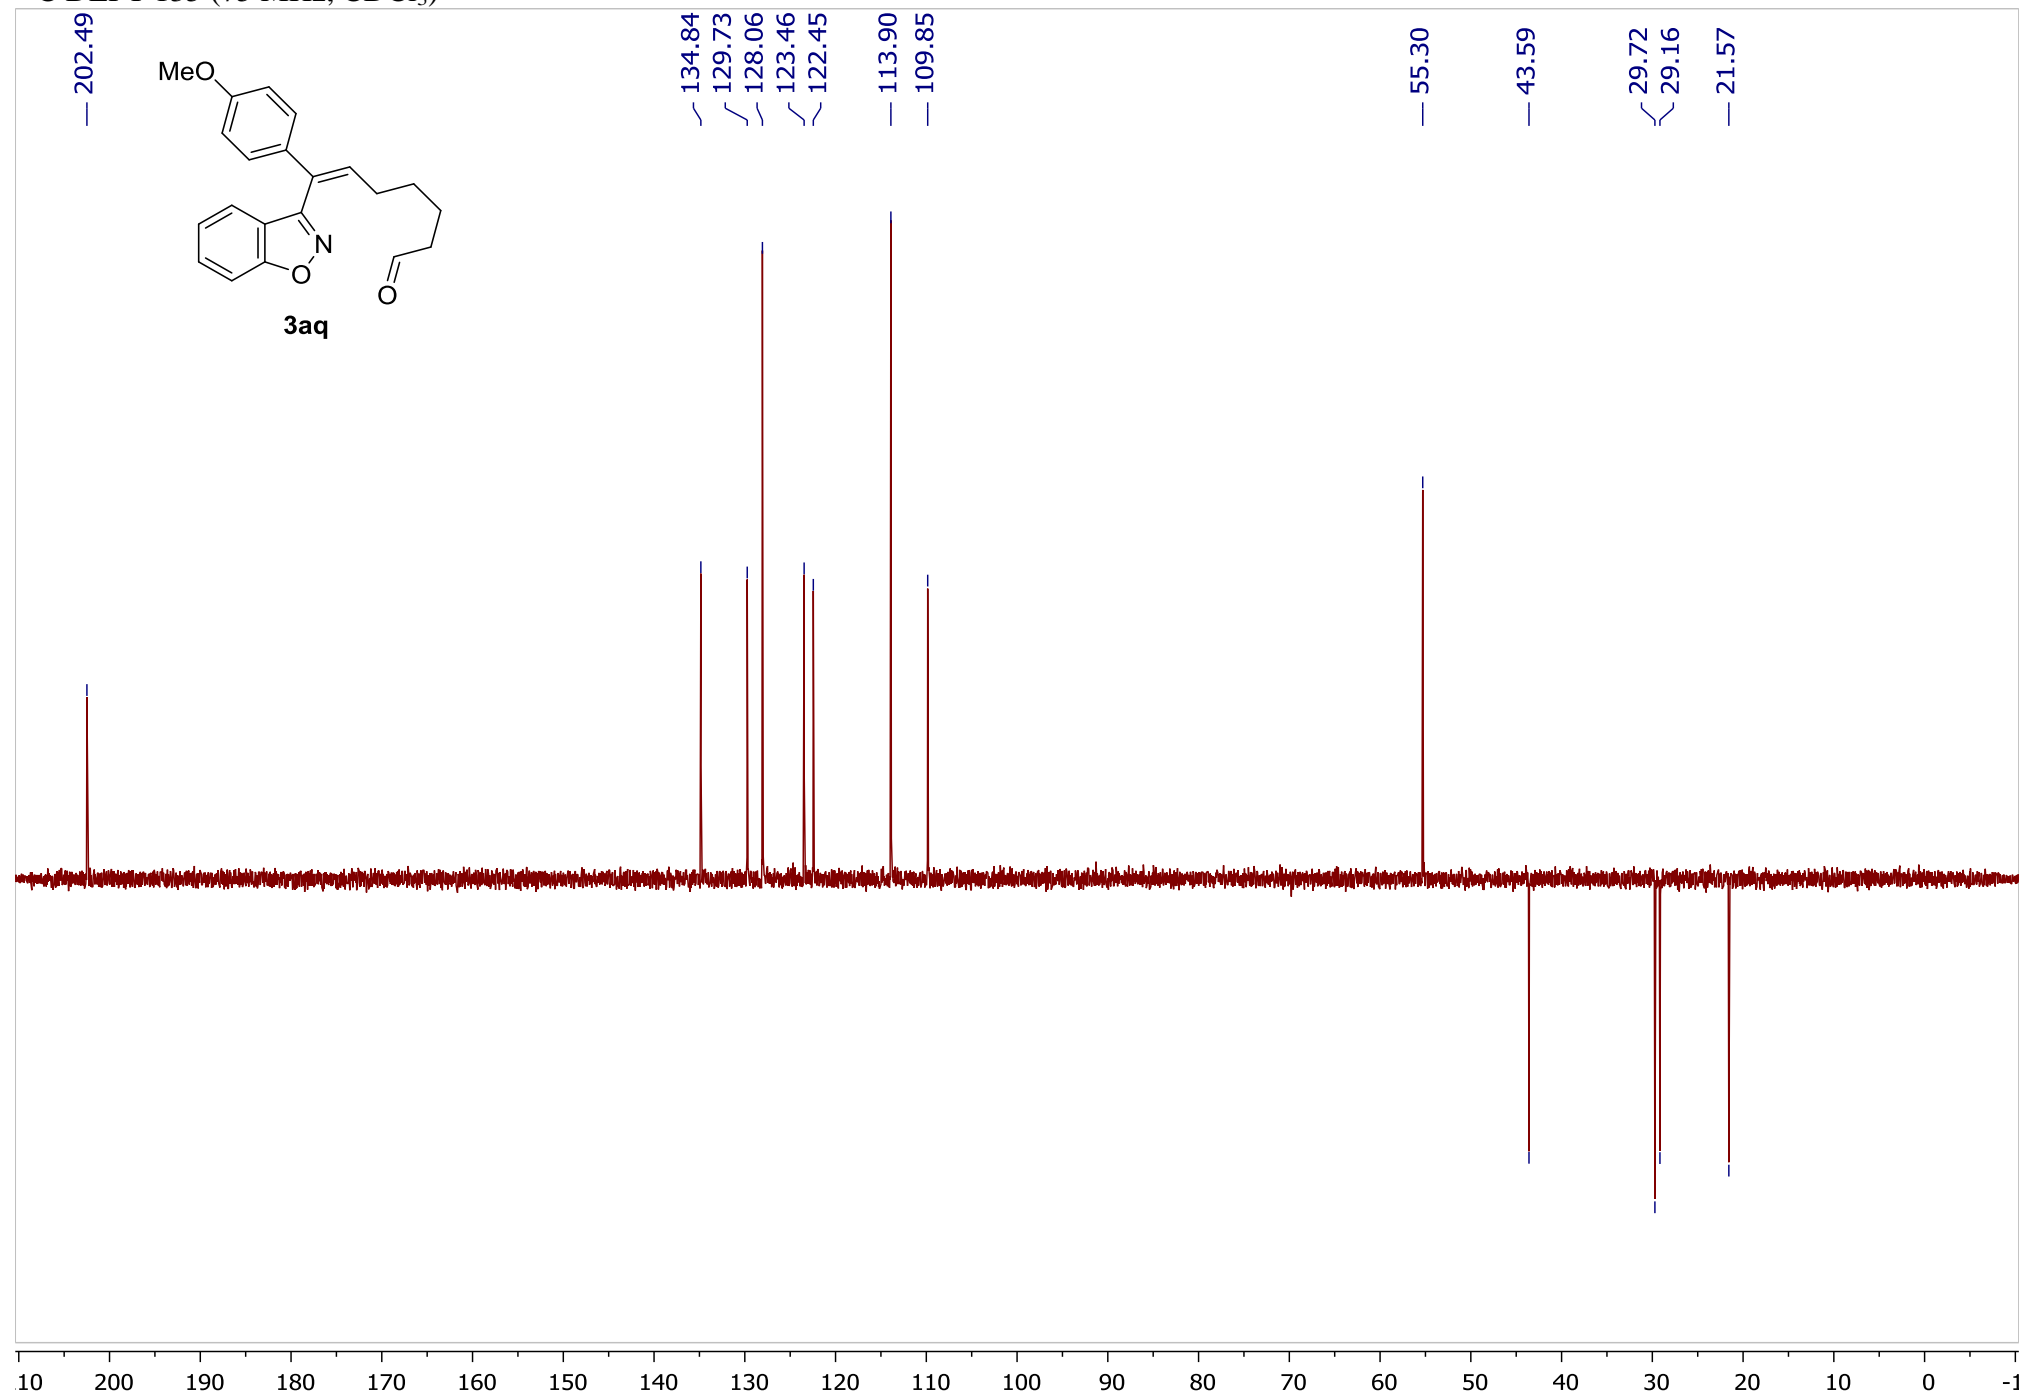

$^1\text{H}$ - $^1\text{H}$  COSY

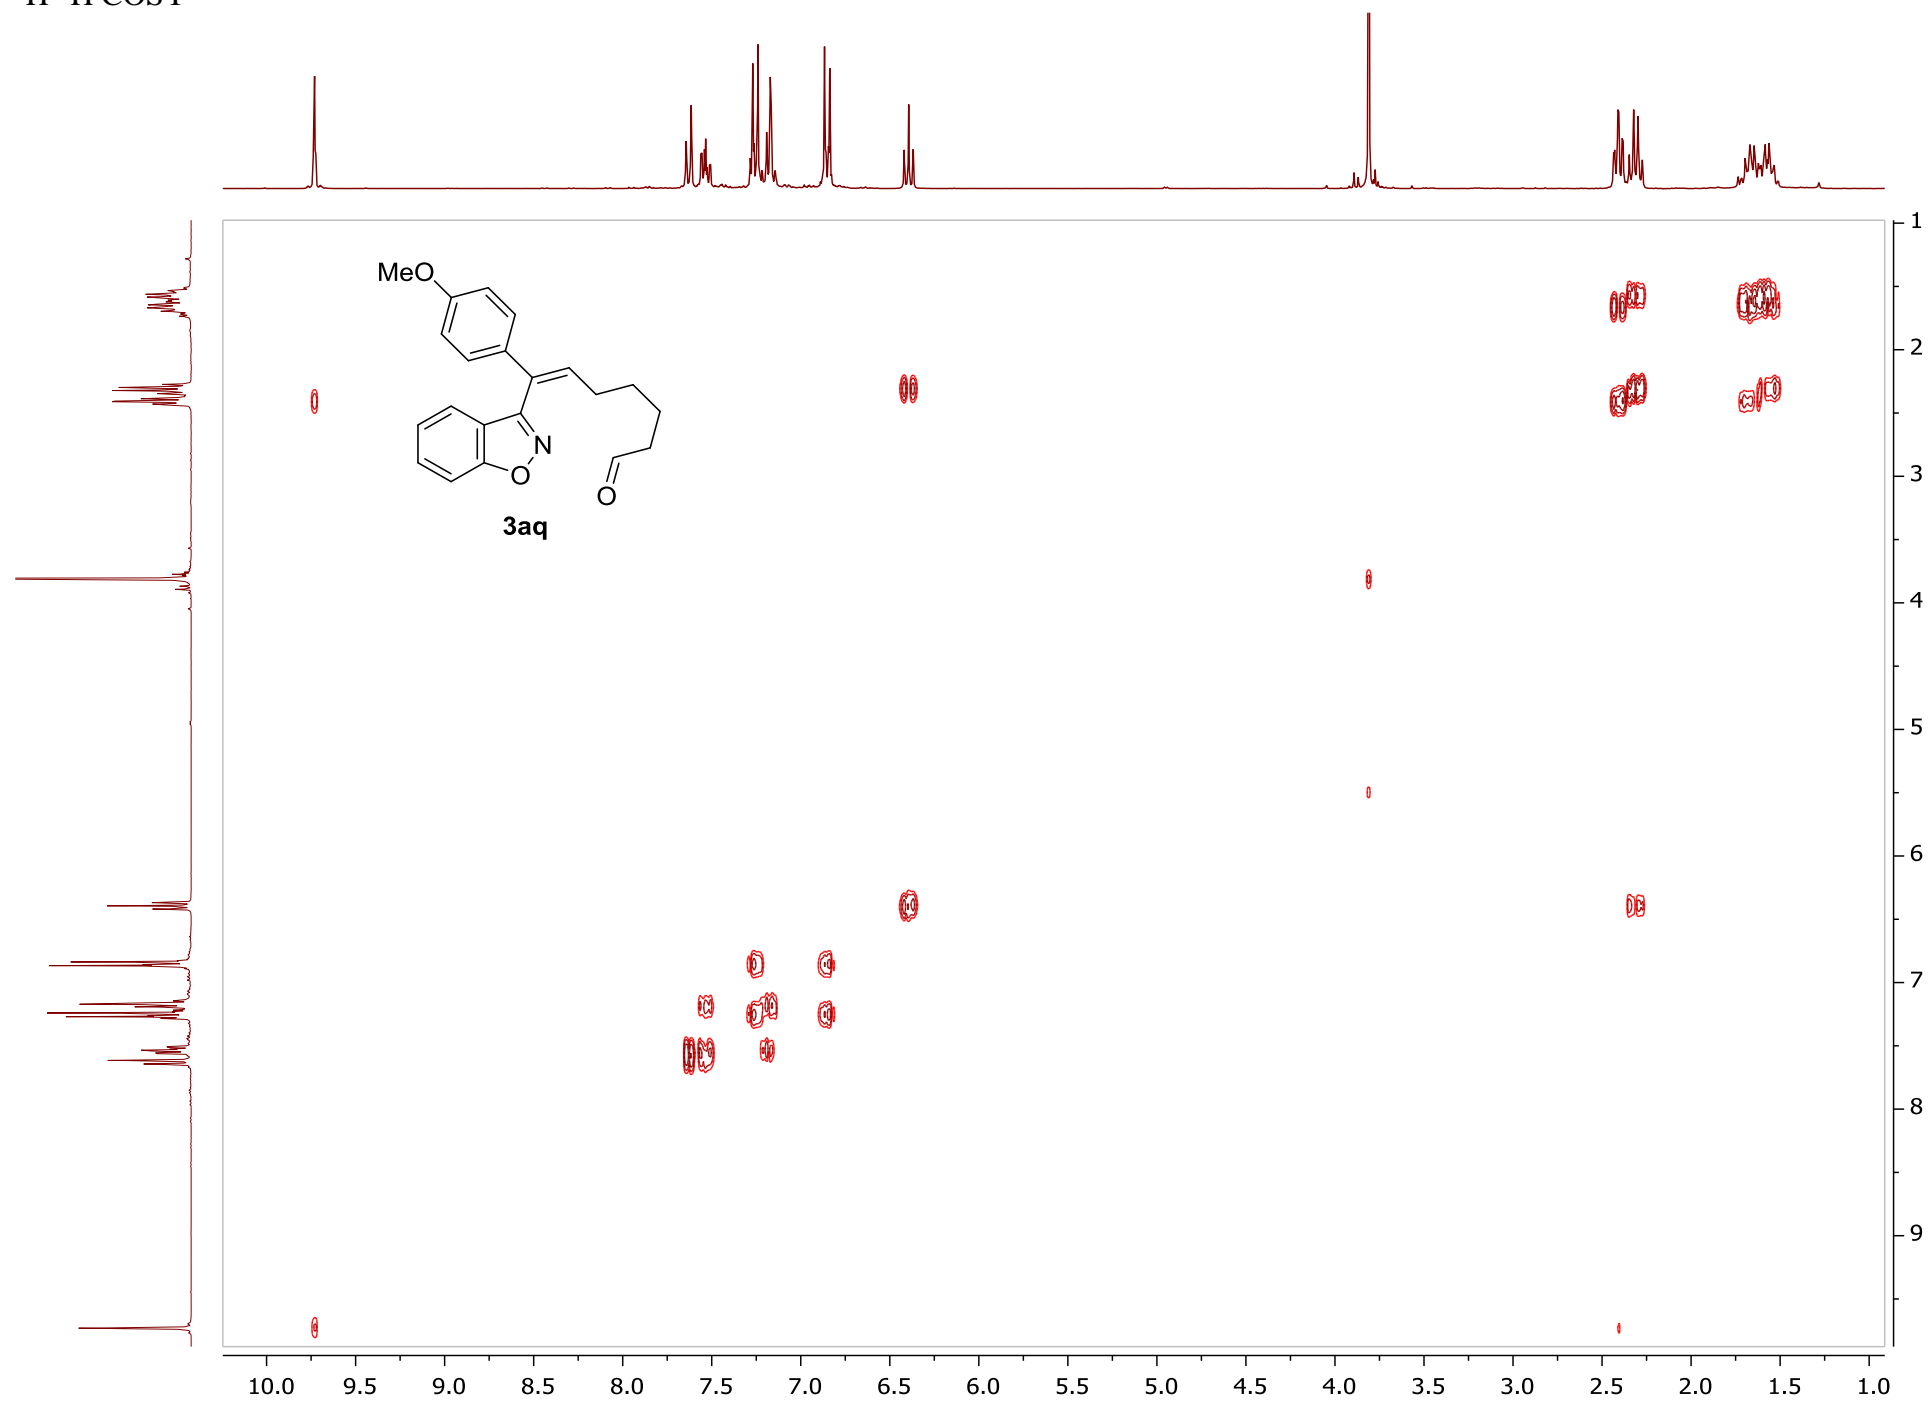

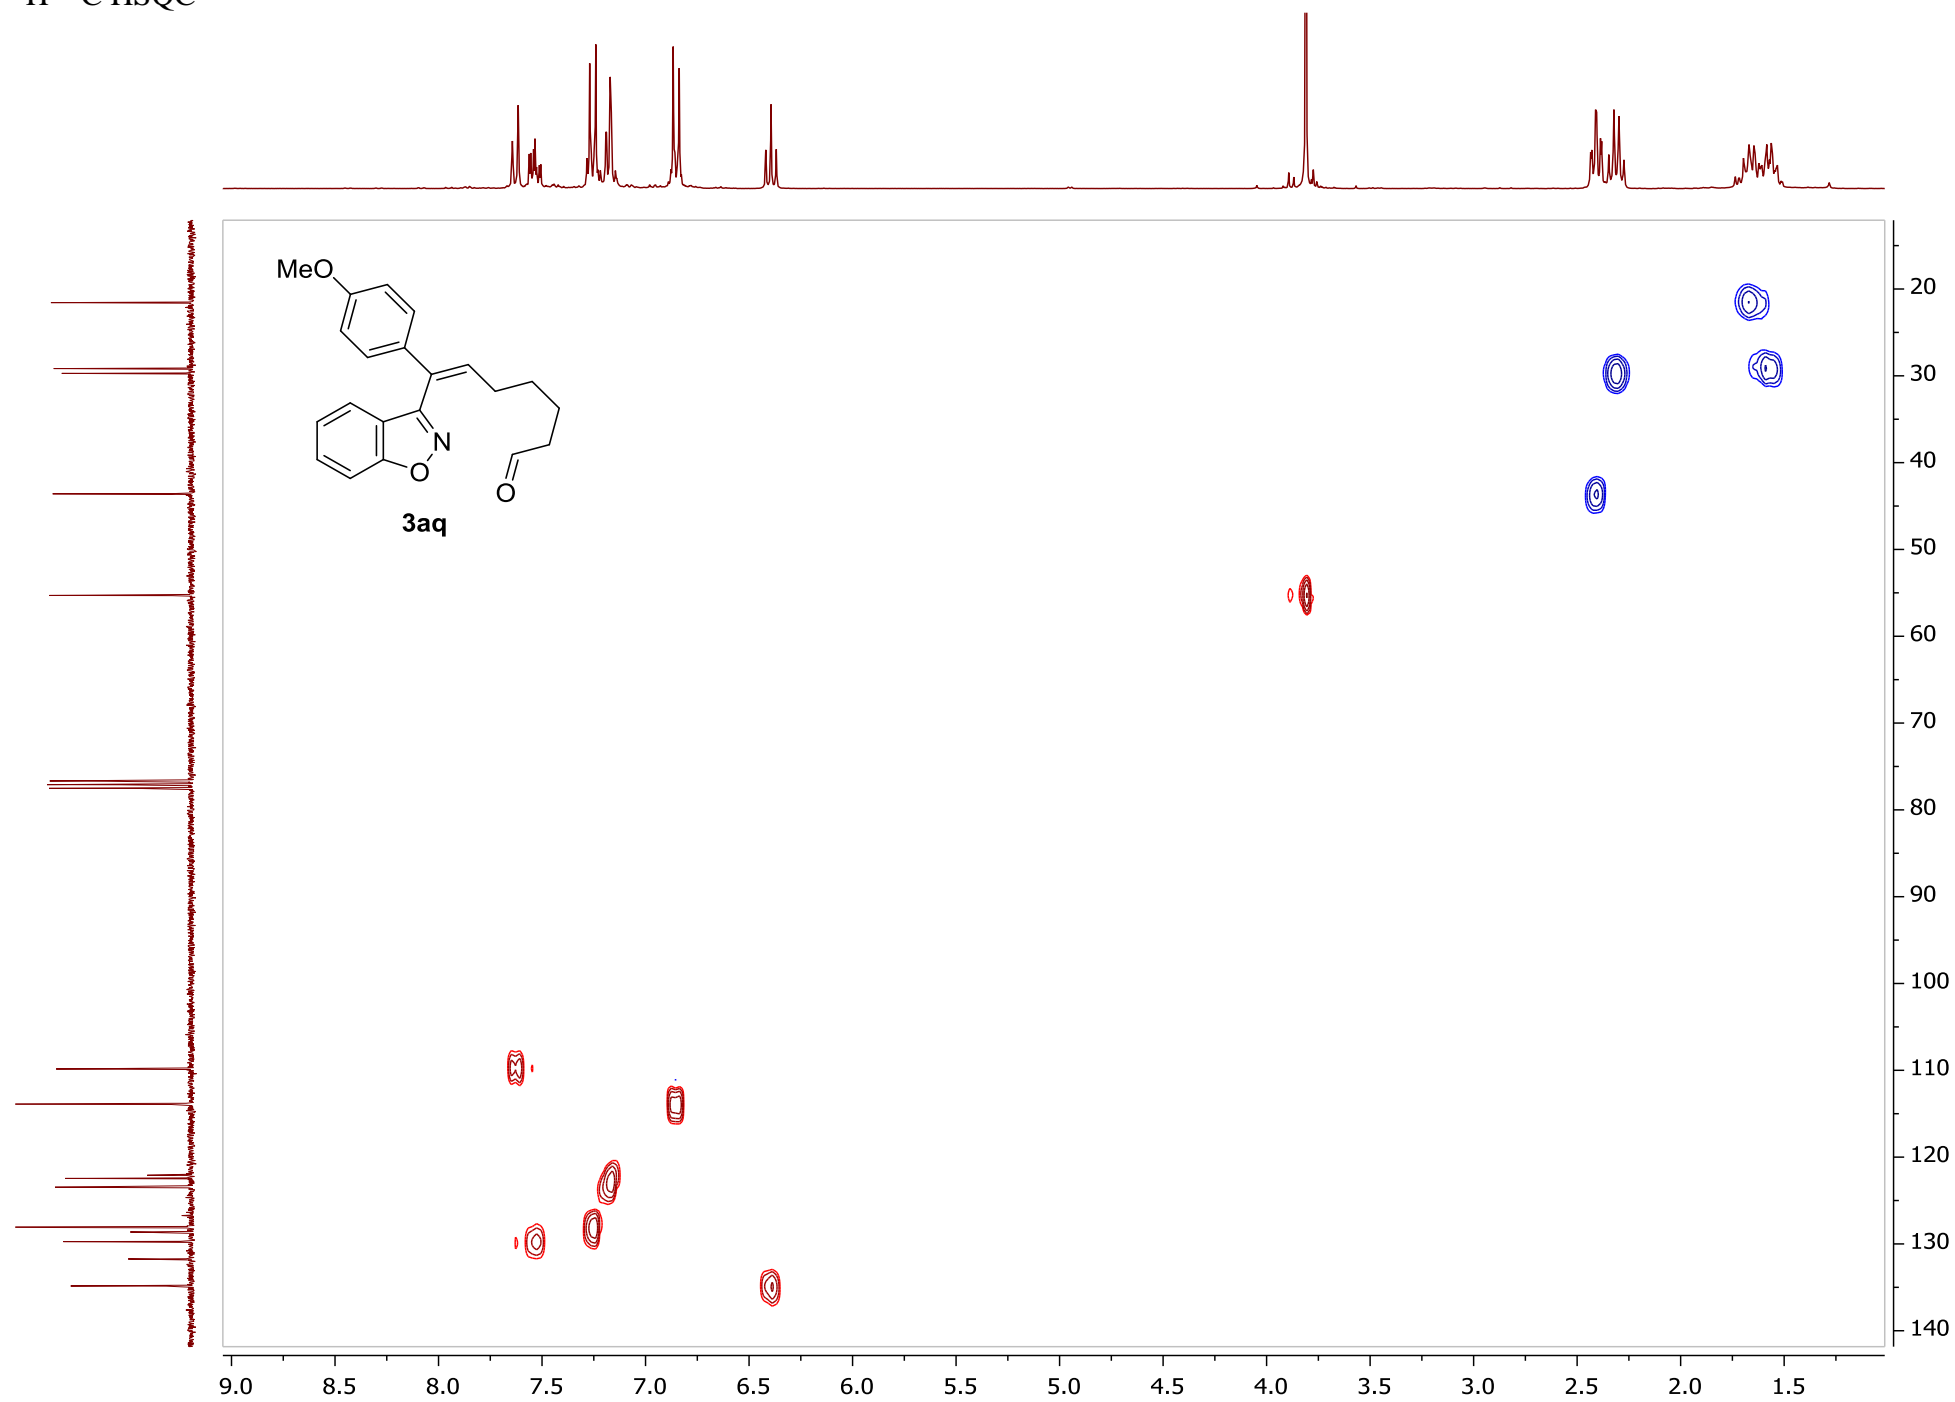

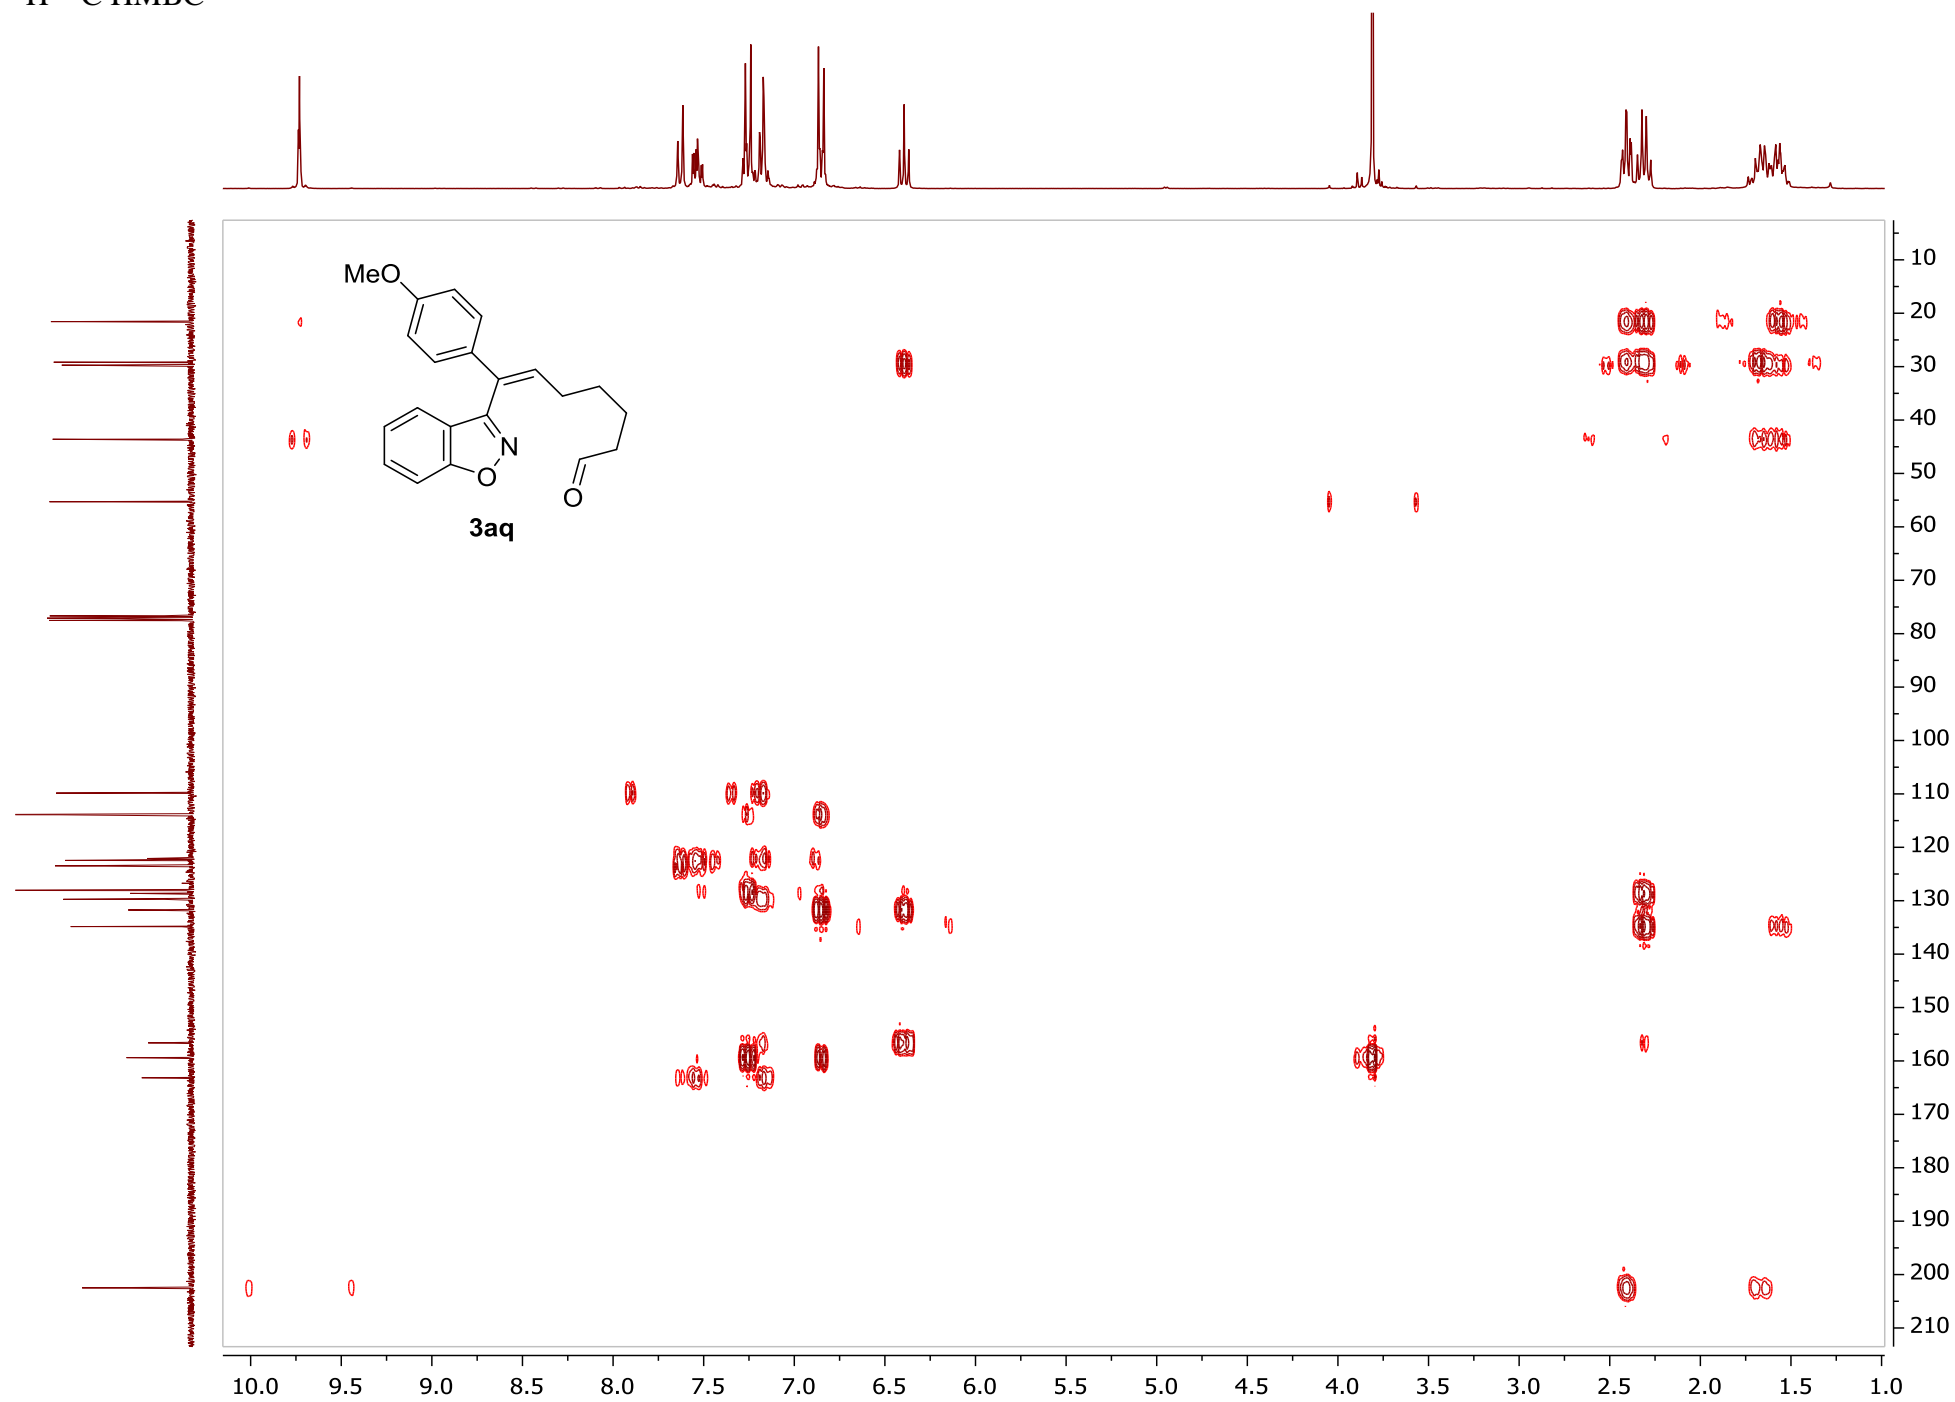

$^1\text{H}$ - $^1\text{H}$  NOESY

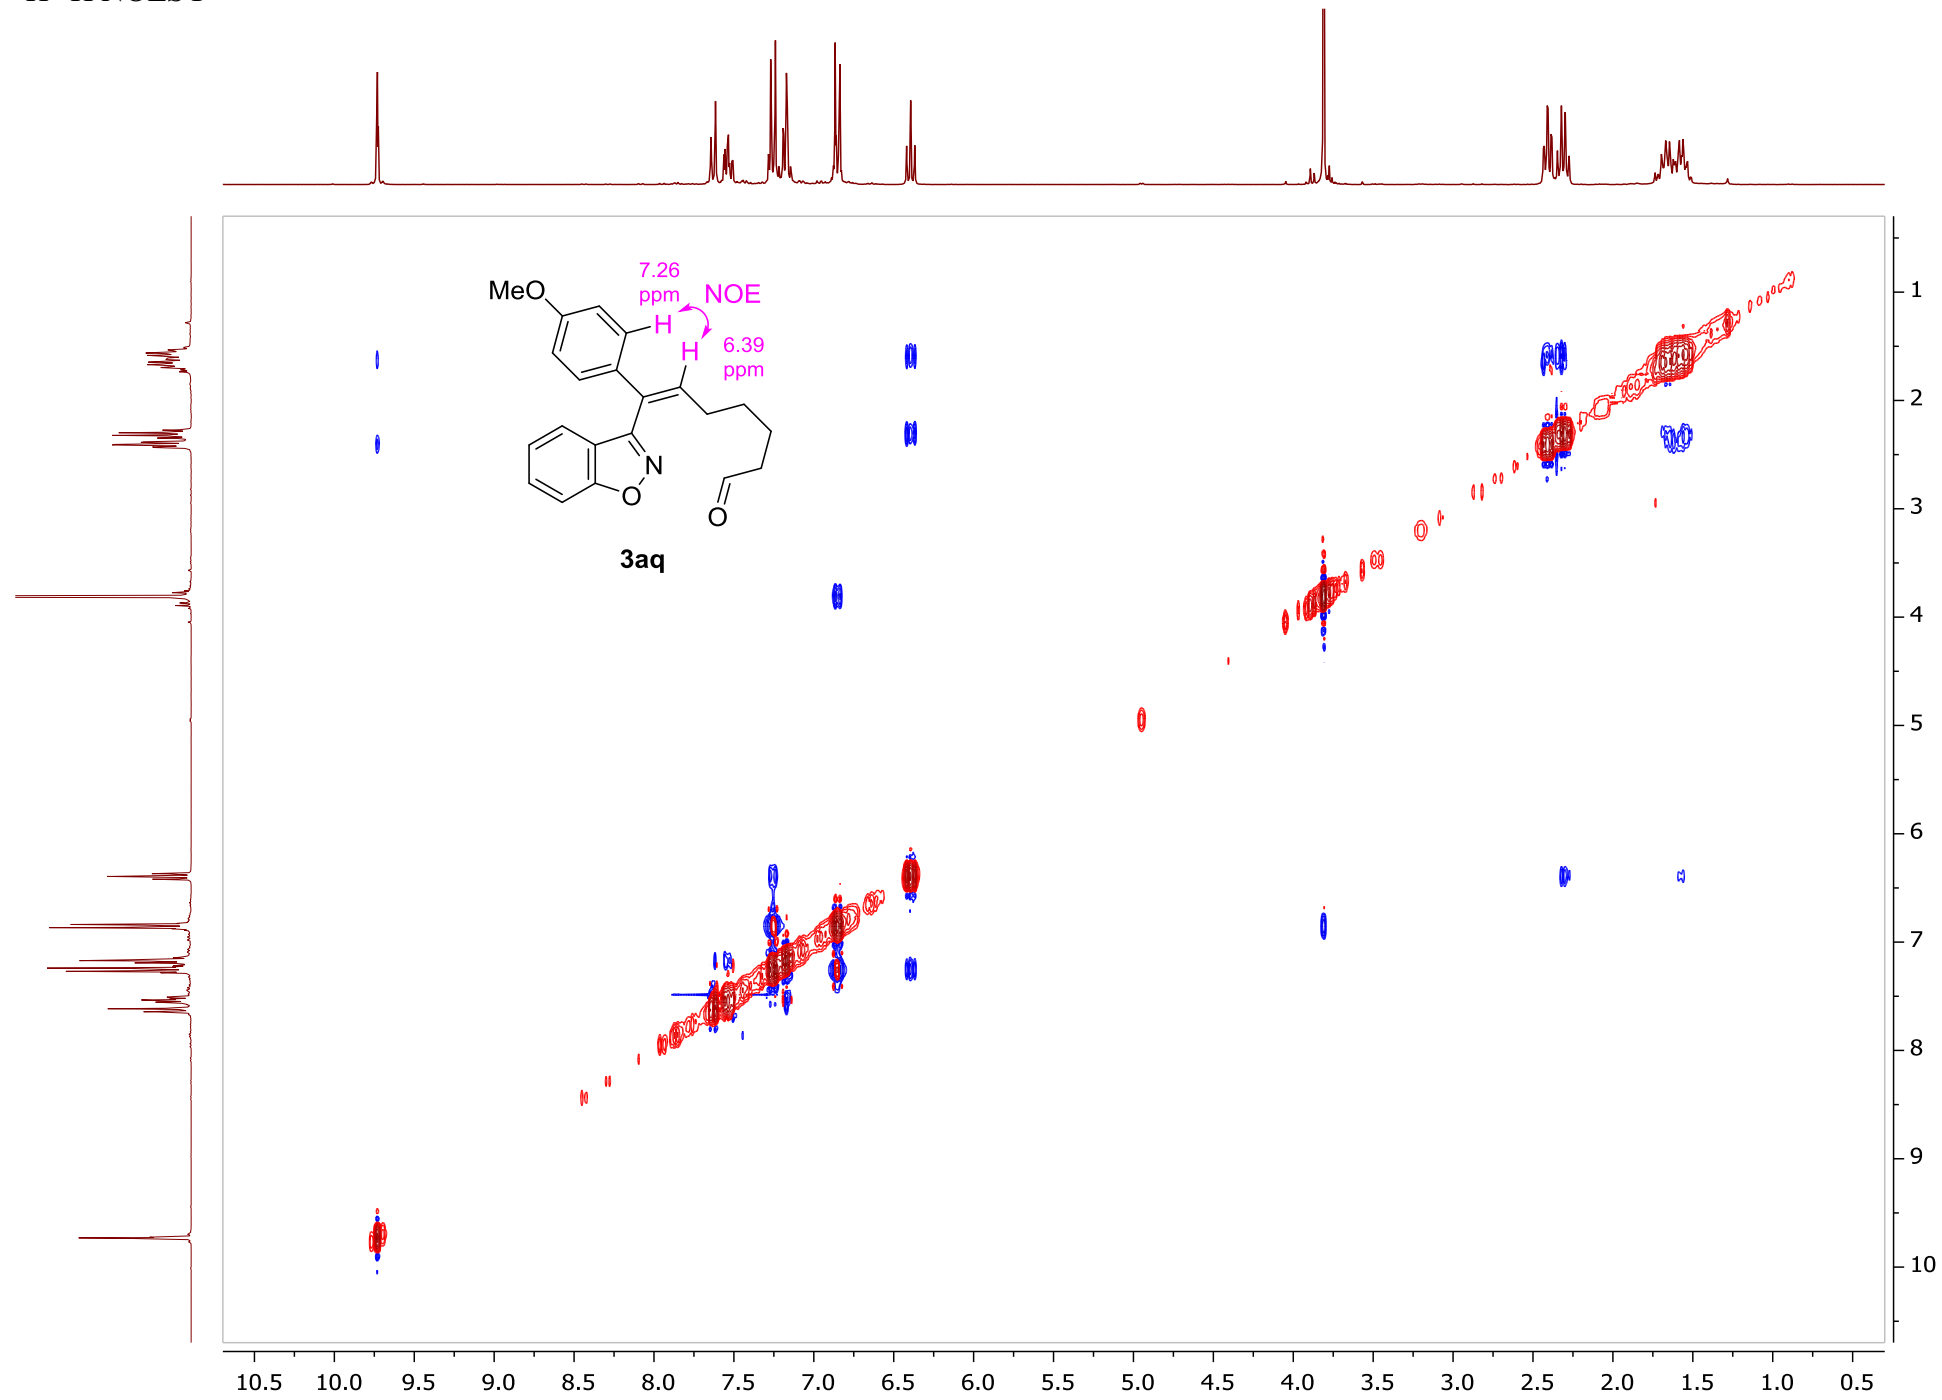

**(4a*S*\*,11a*R*\*,11b*R*\*)-11a-(4-Methoxyphenyl)-2,3,4,4a,11a,11b-hexahydro-1H-benzo[e]benzofuro[3,2-c][1,2]oxazine 4aq**

<sup>1</sup>H NMR (300 MHz, CDCl<sub>3</sub>)

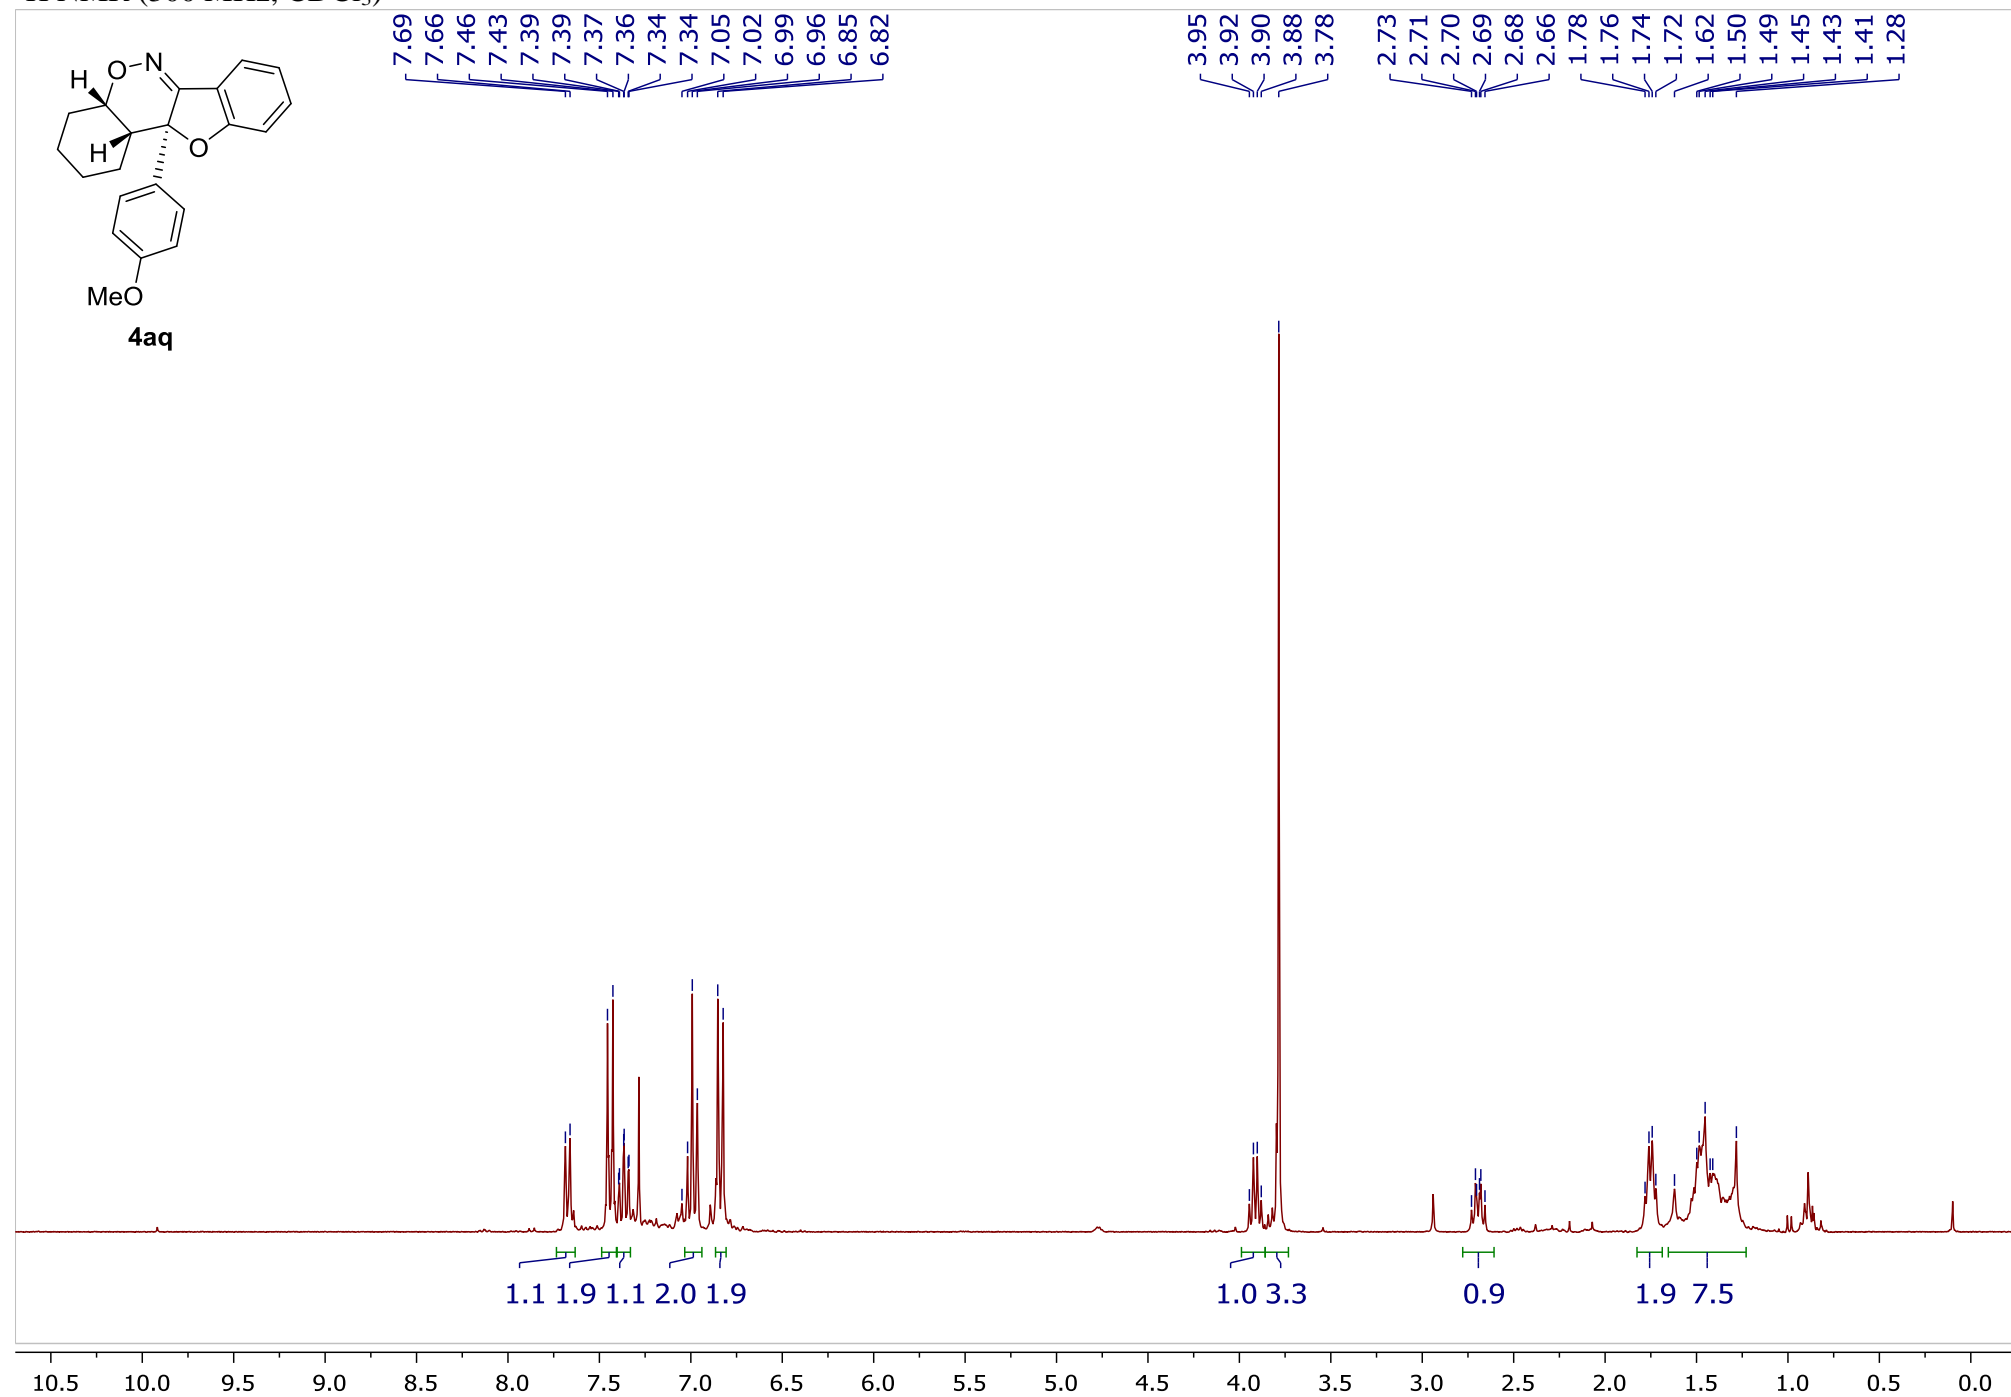

$^{13}\text{C}\{^1\text{H}\}$  NMR (75 MHz,  $\text{CDCl}_3$ )

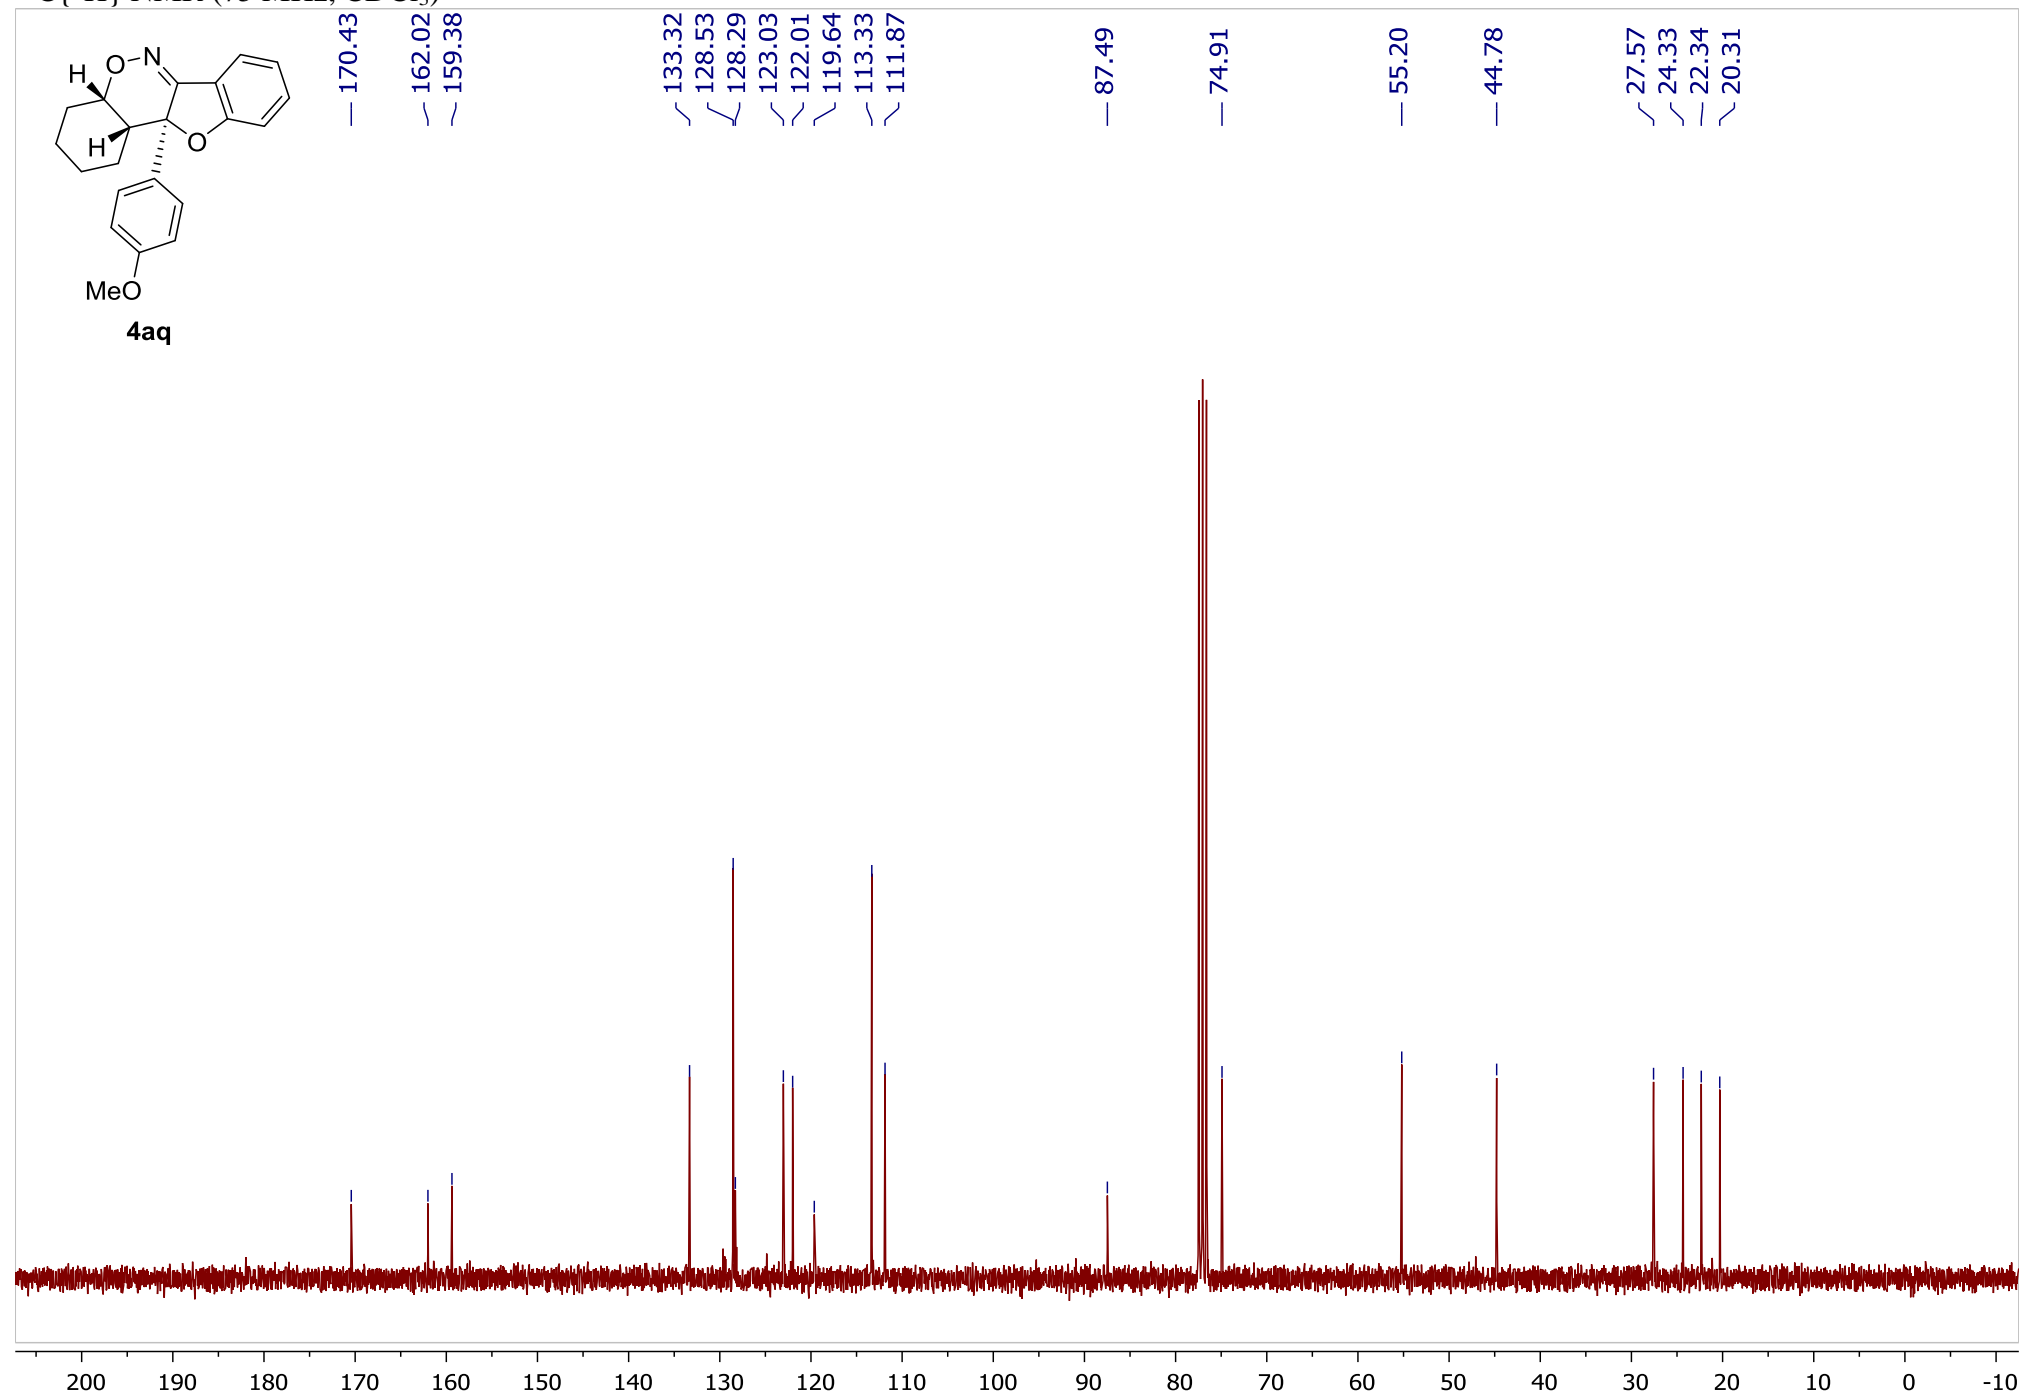

<sup>13</sup>C DEPT 135 (75 MHz, CDCl<sub>3</sub>)

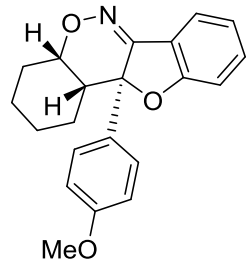

**4aq**

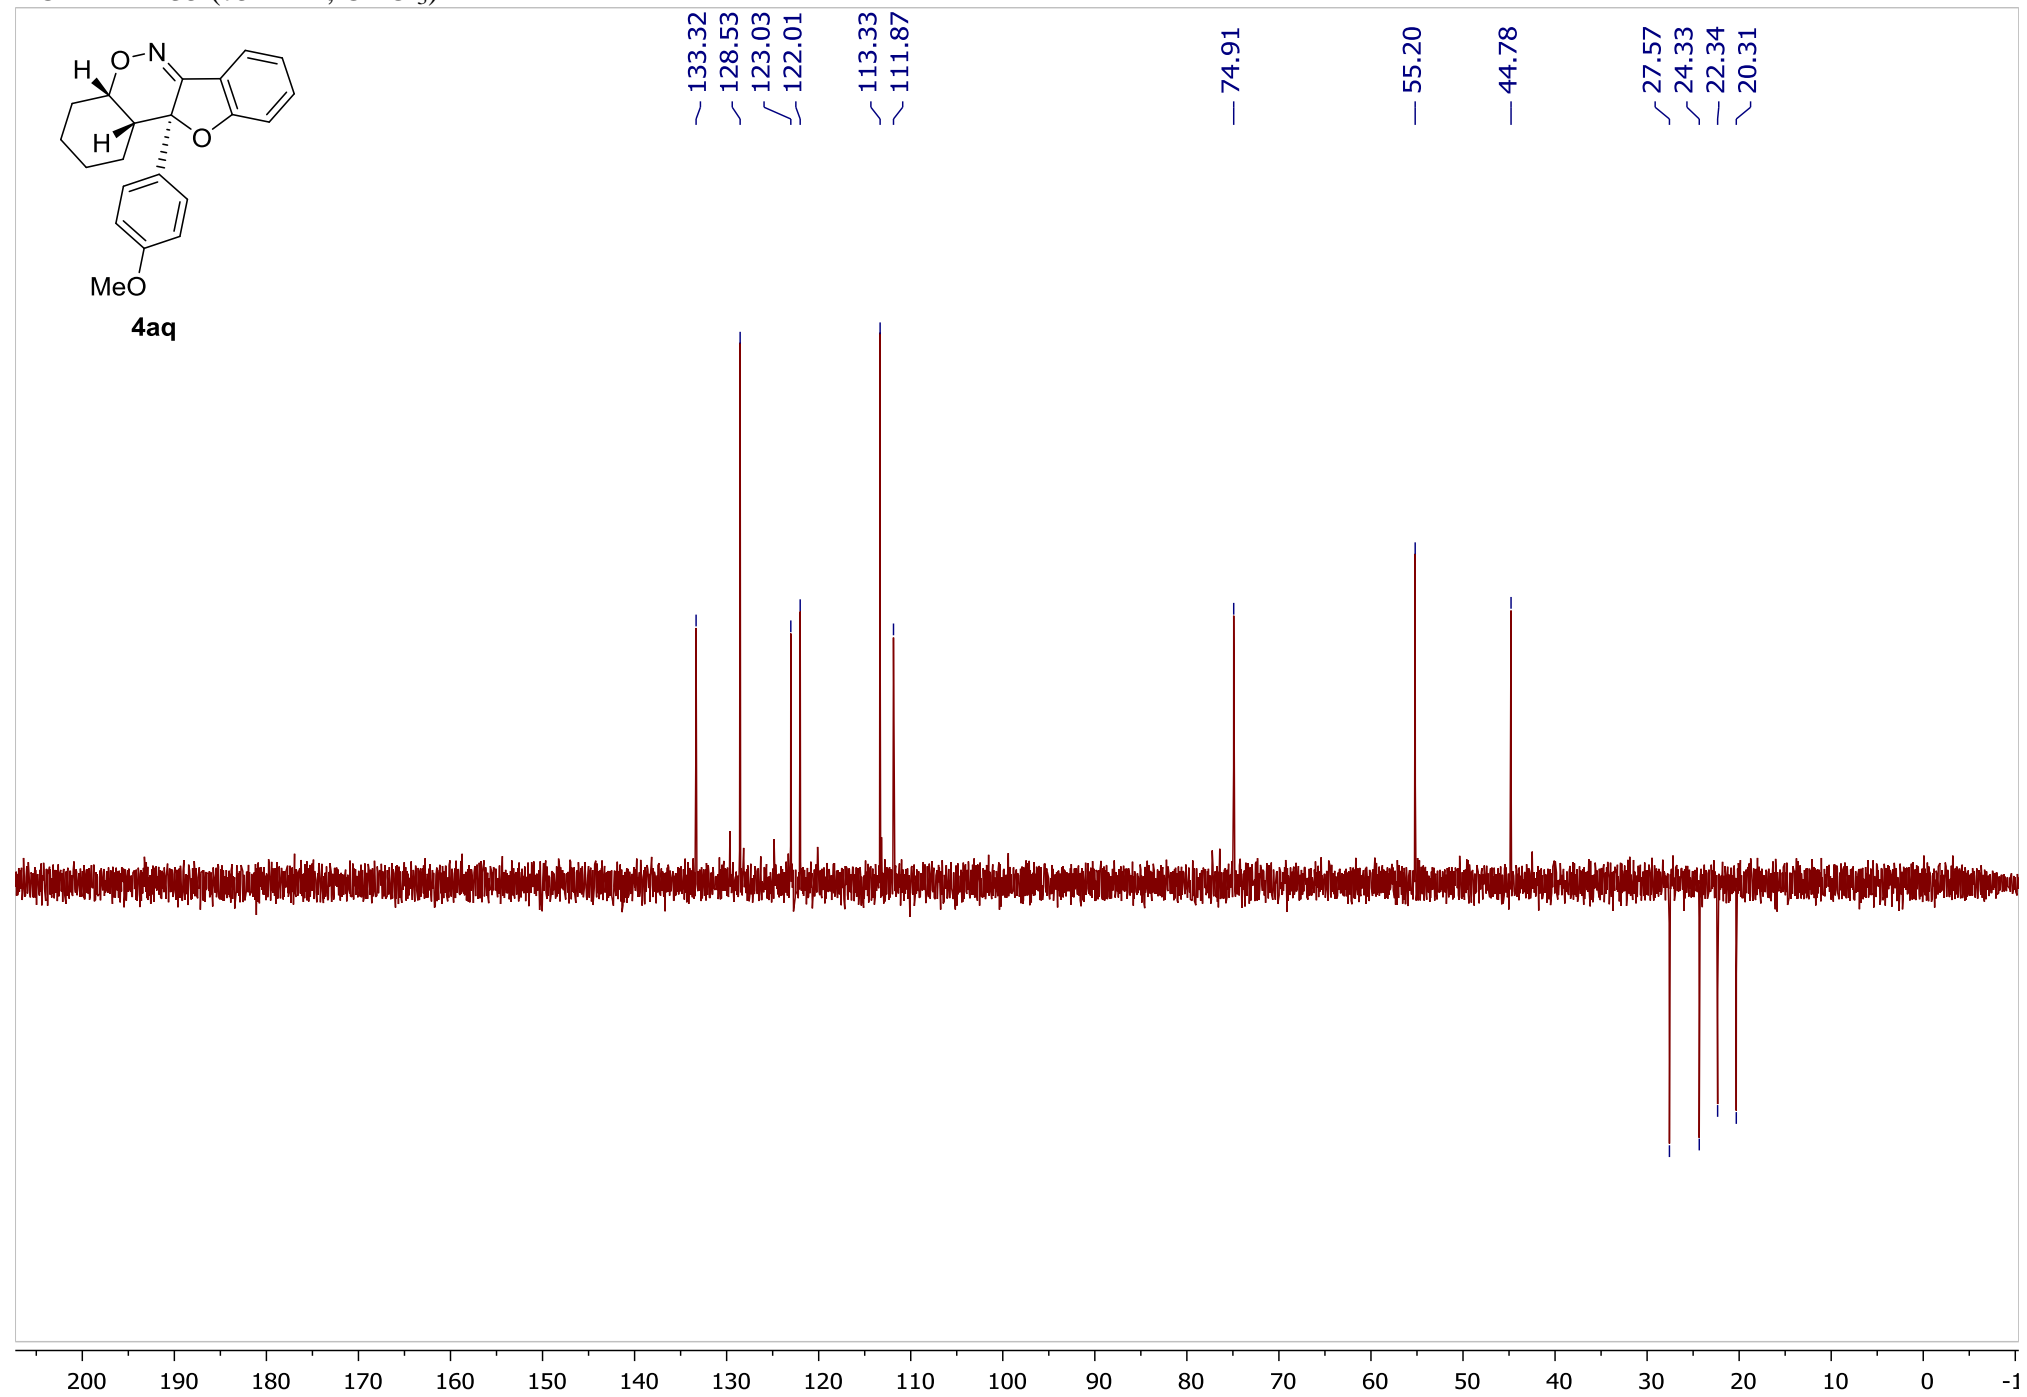



$^1\text{H}$ - $^1\text{H}$  COSY

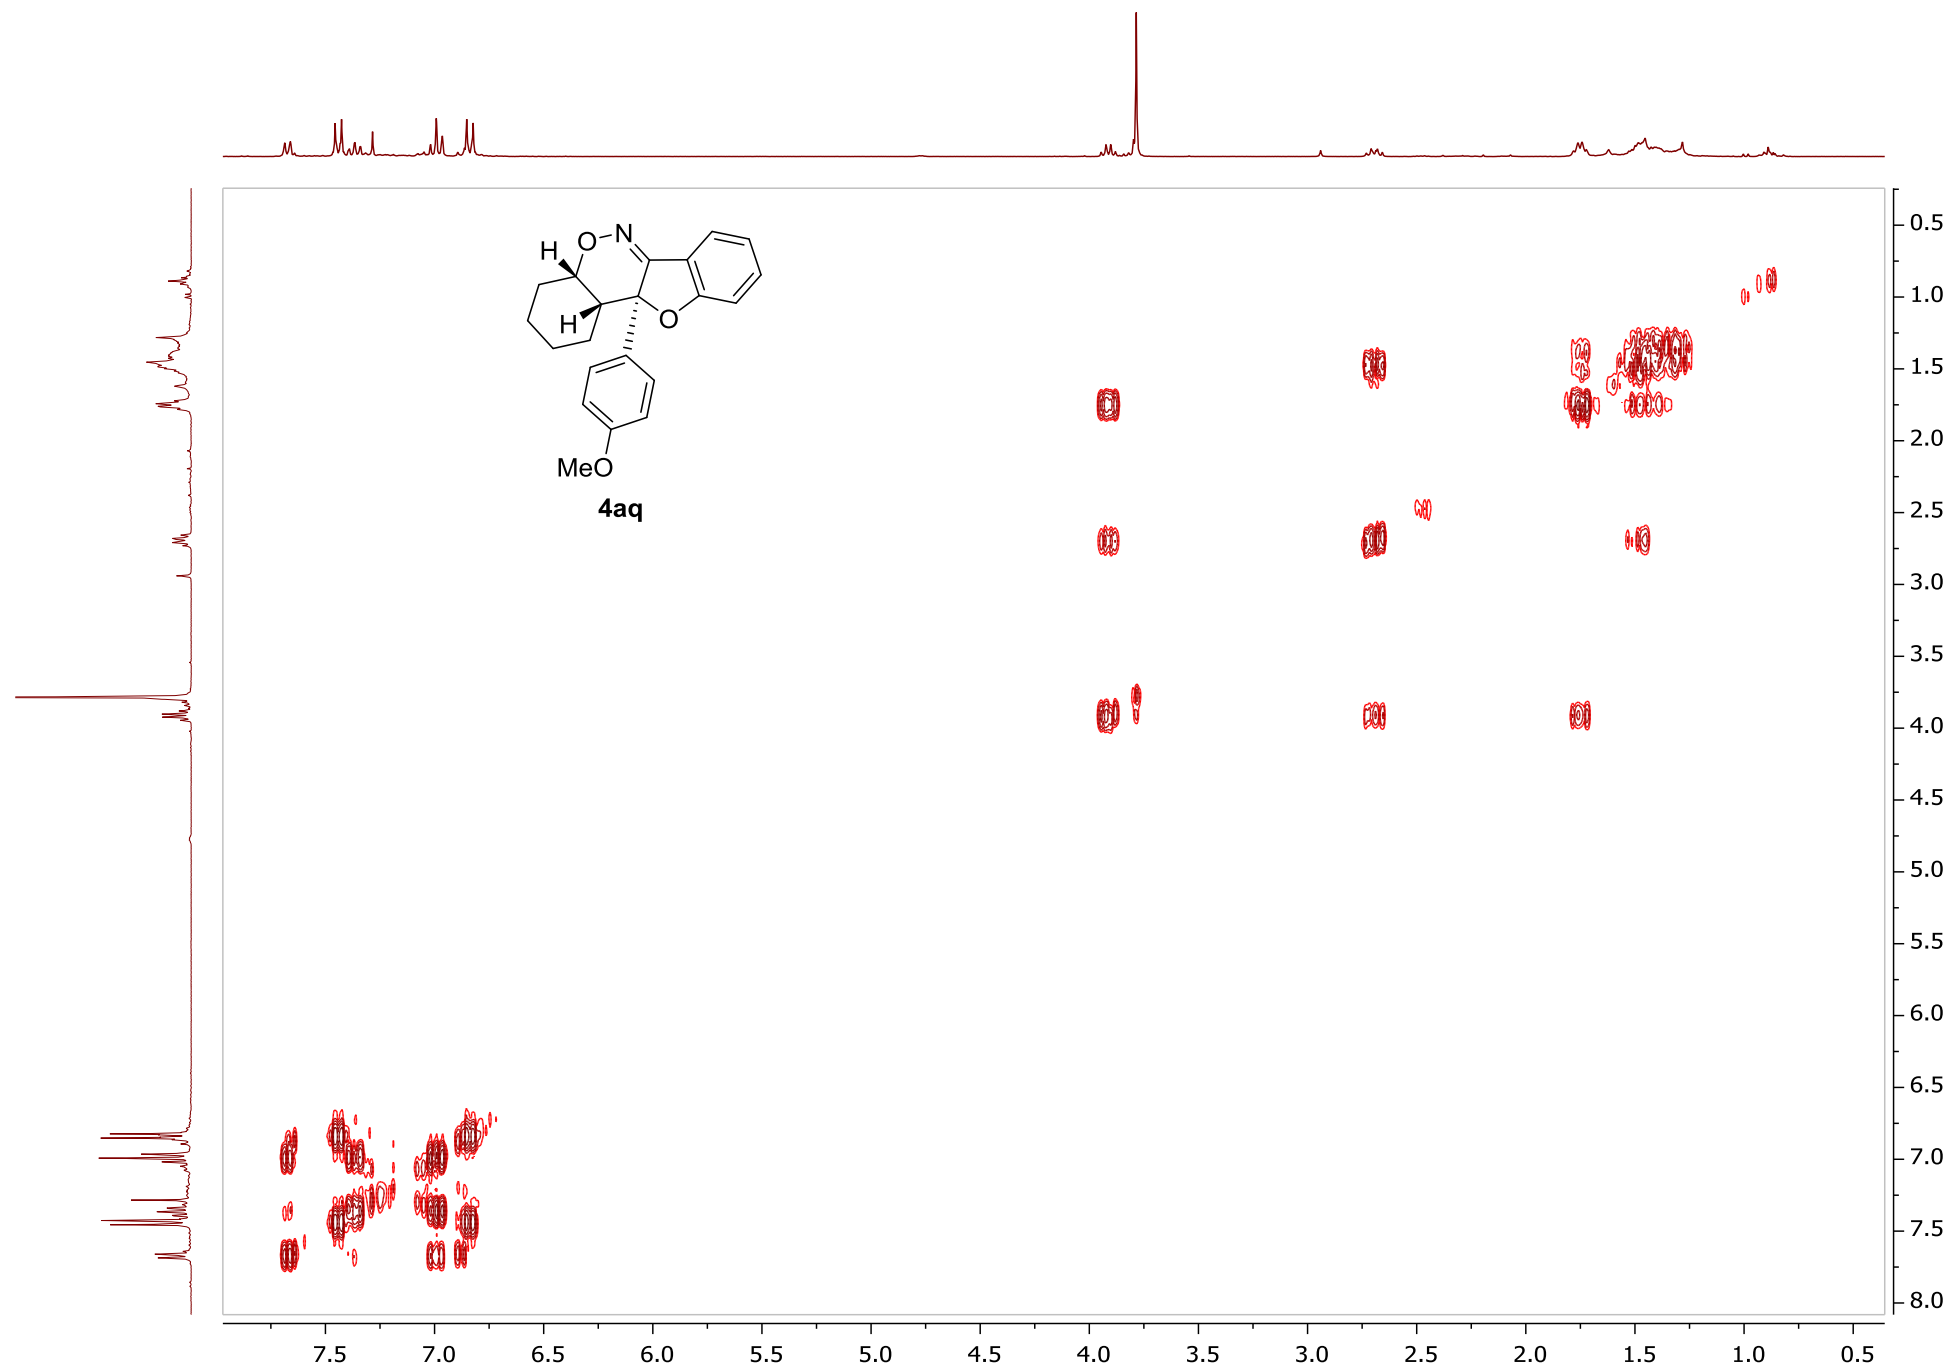

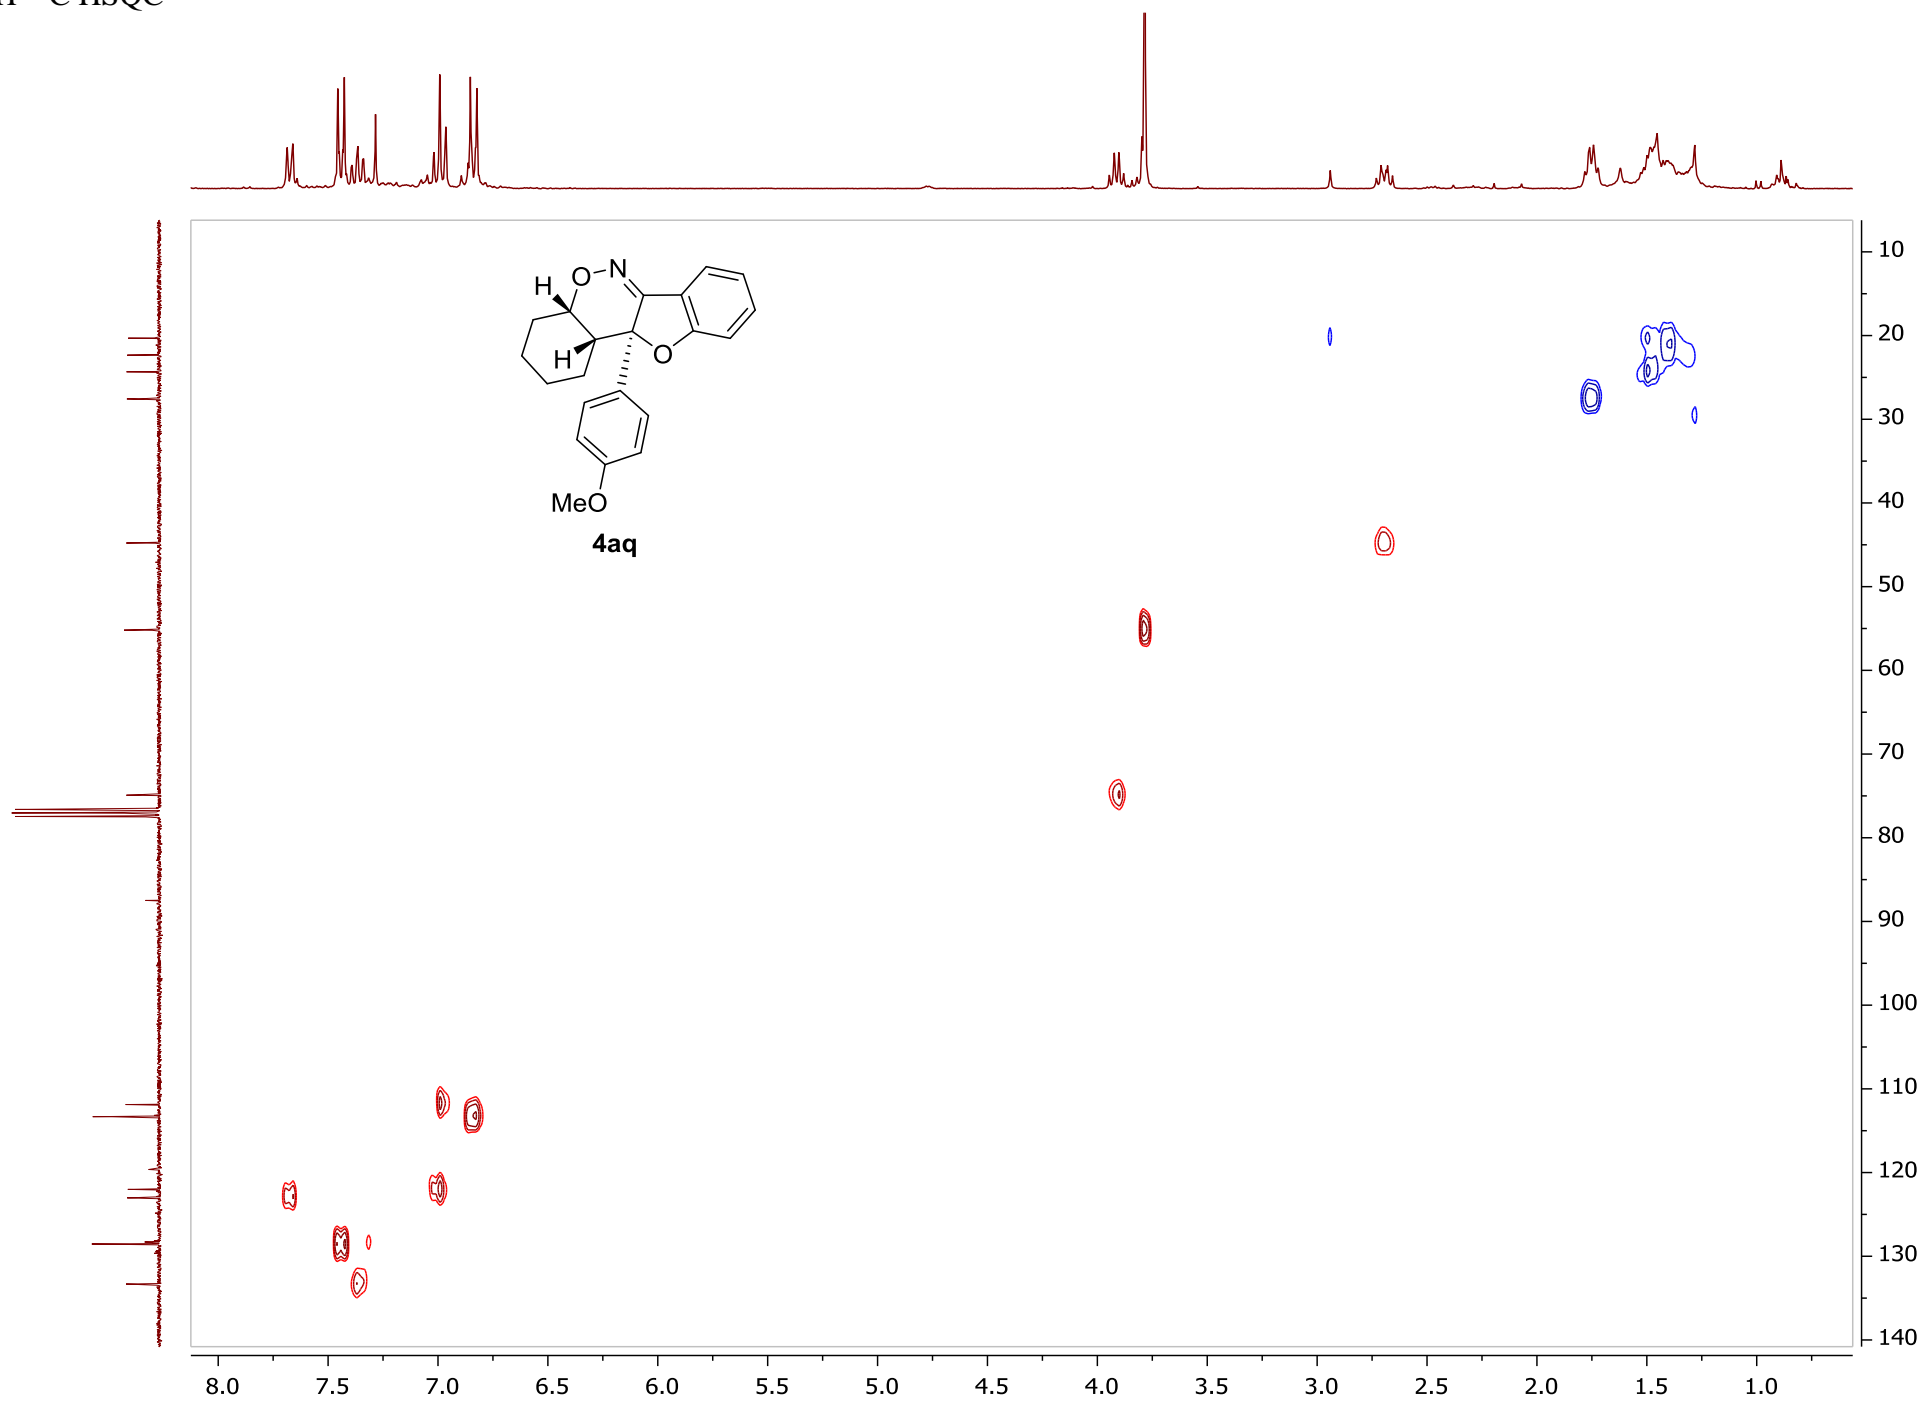

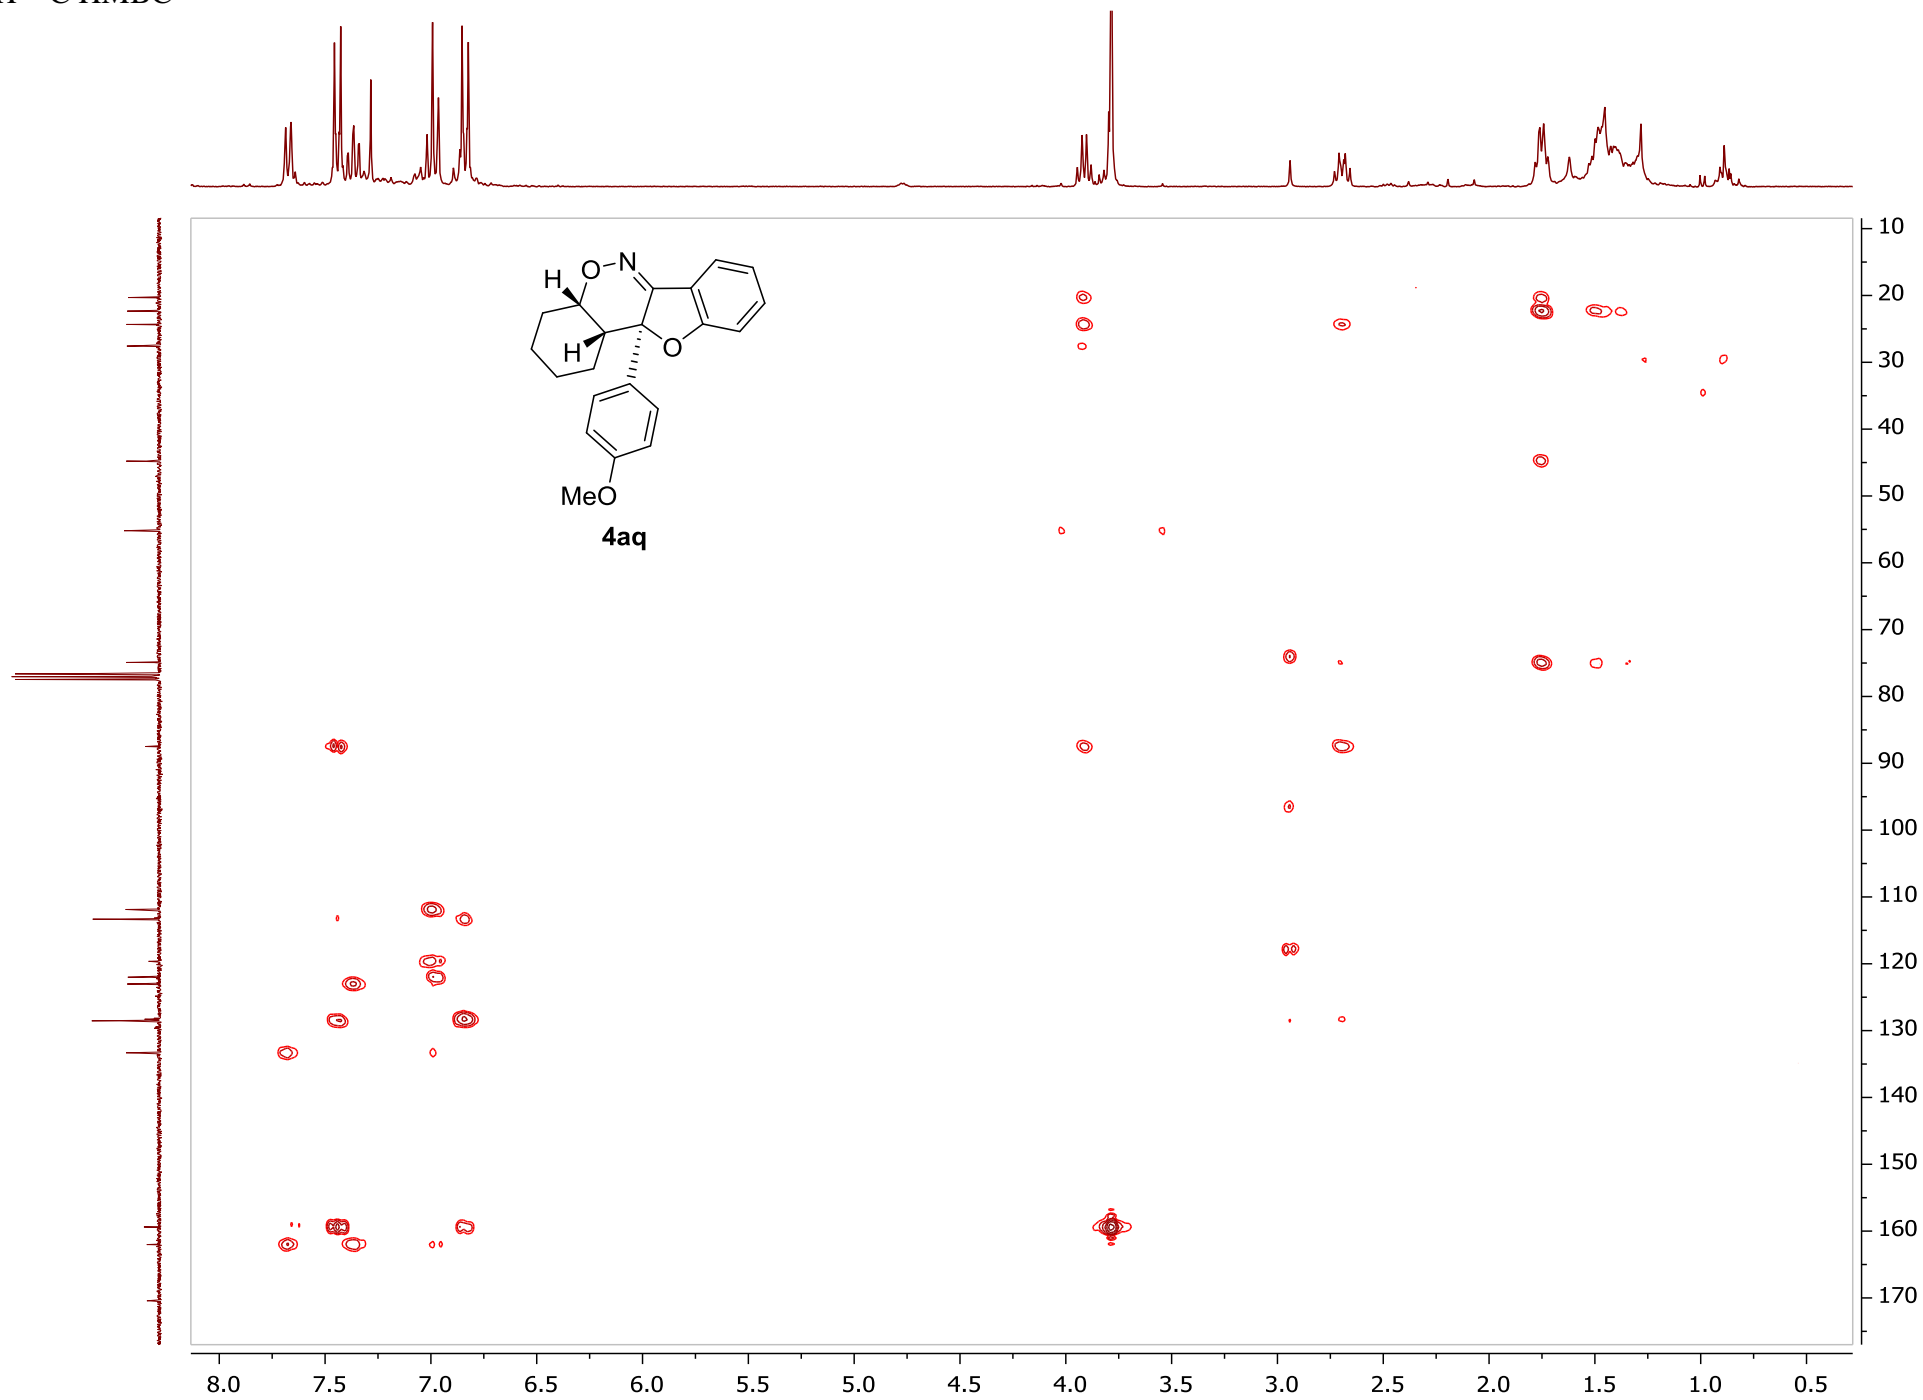

$^1\text{H}$ - $^1\text{H}$  NOESY

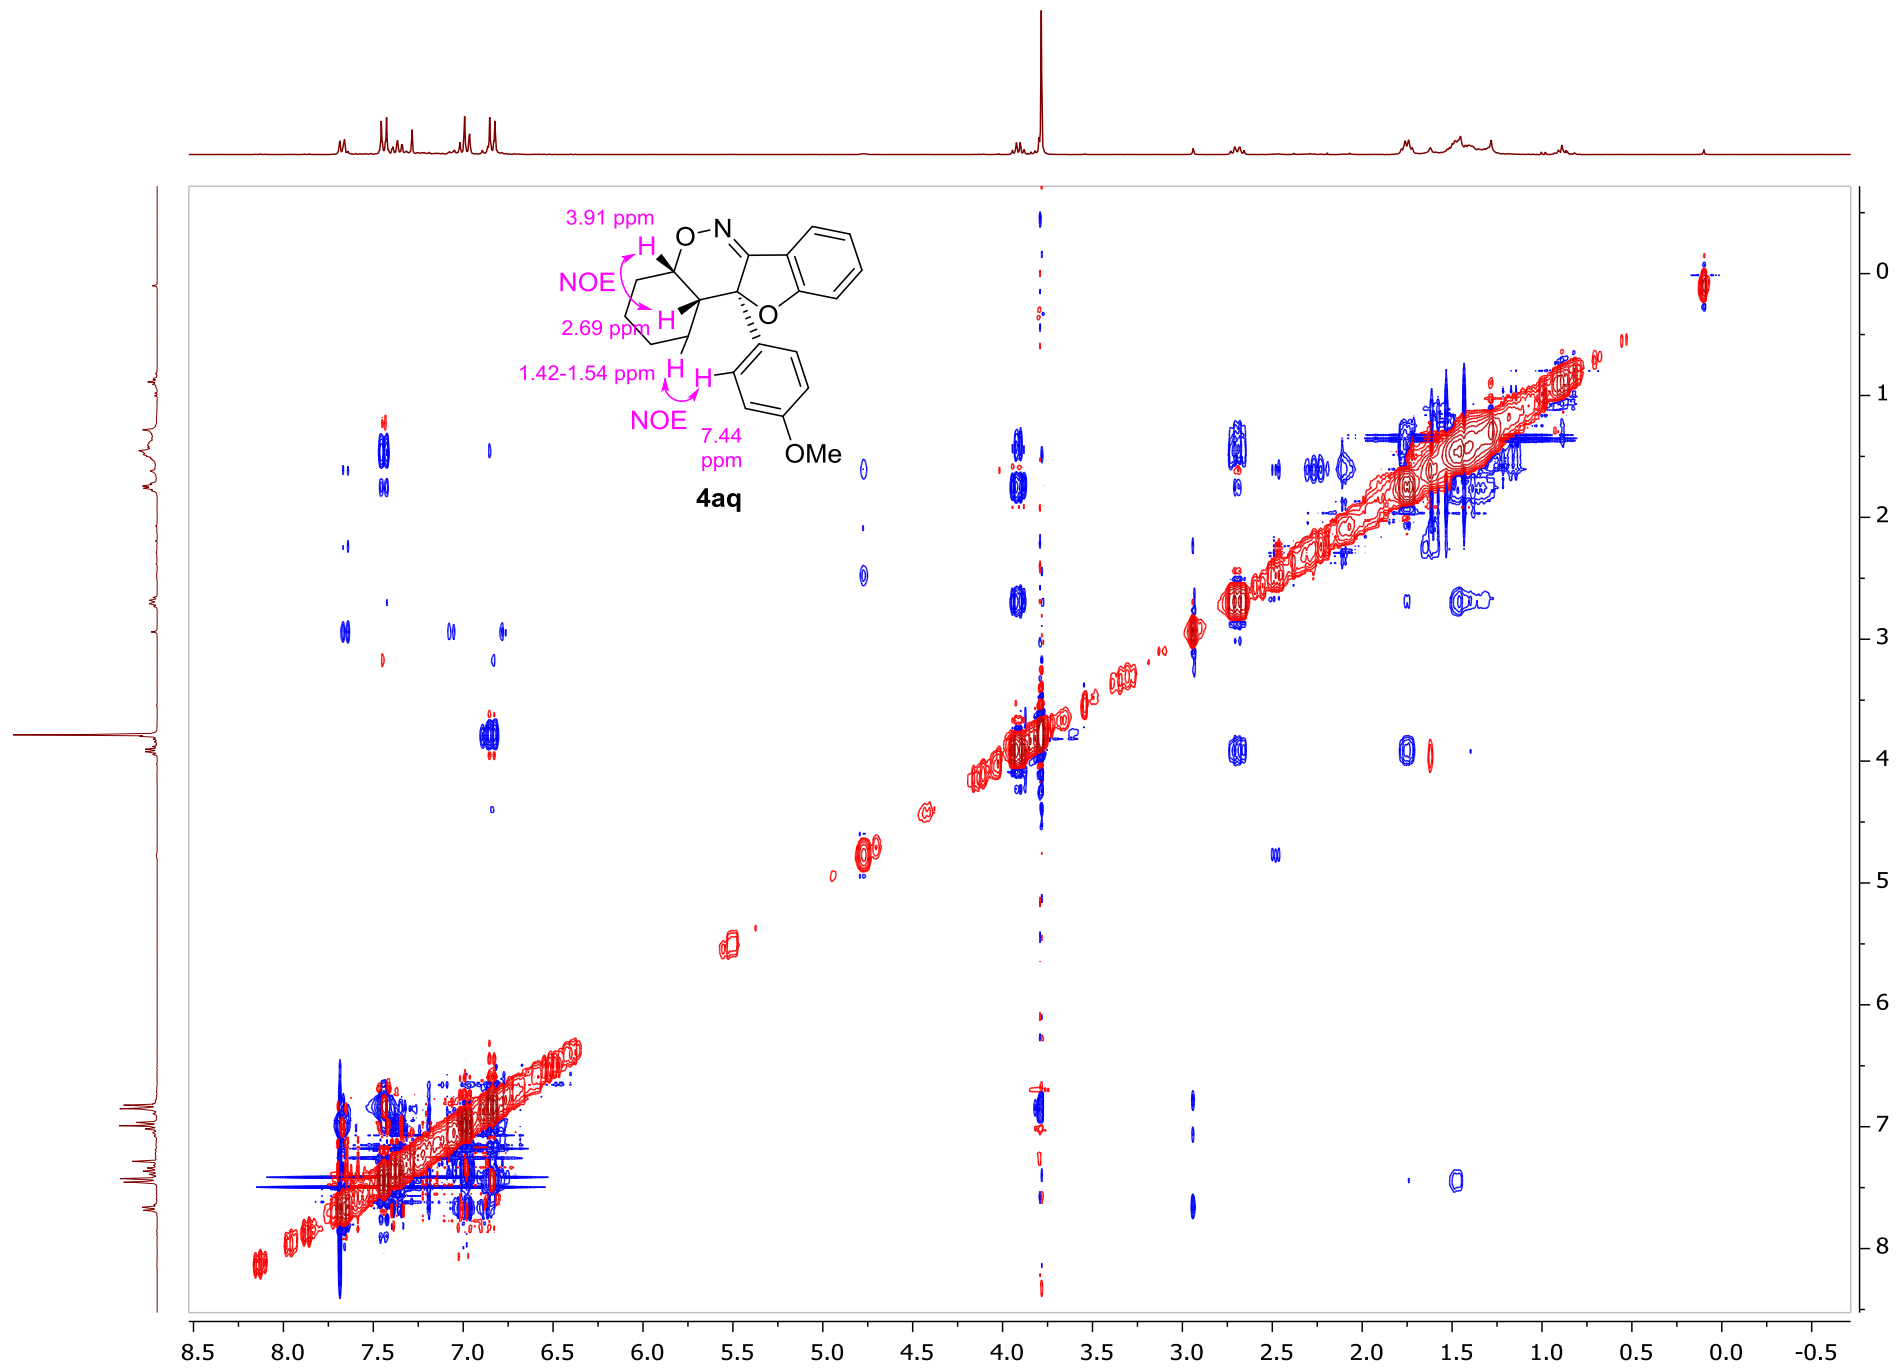

# 2-(1-Imino-2-(4-methoxyphenyl)propyl)phenol 7

$^1\text{H}$  NMR (300 MHz,  $\text{CDCl}_3$ )

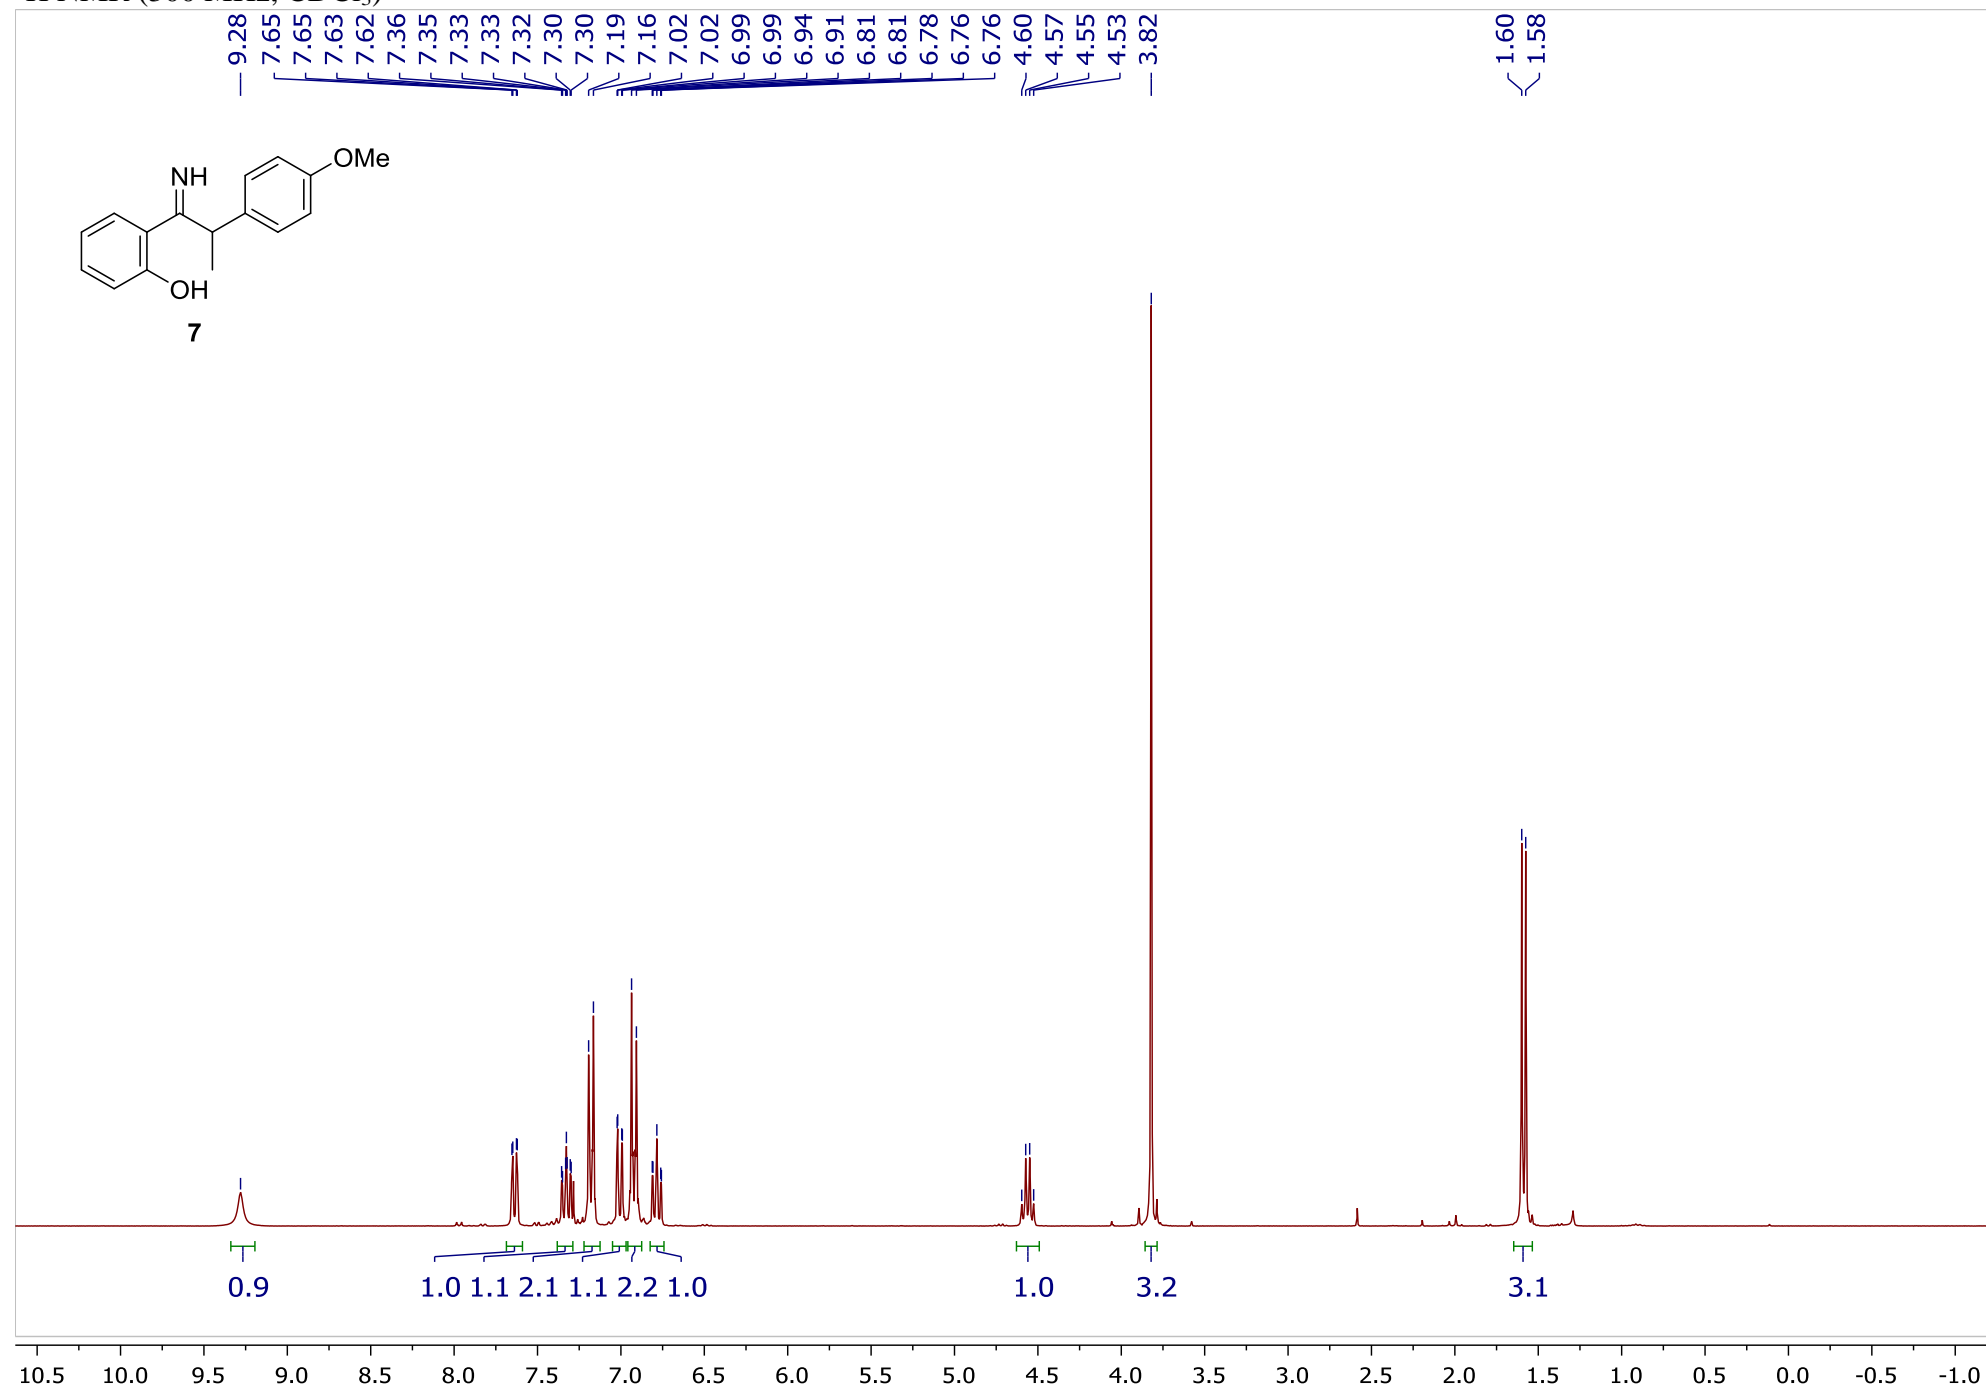

$^{13}\text{C}\{^1\text{H}\}$  NMR (75 MHz,  $\text{CDCl}_3$ )

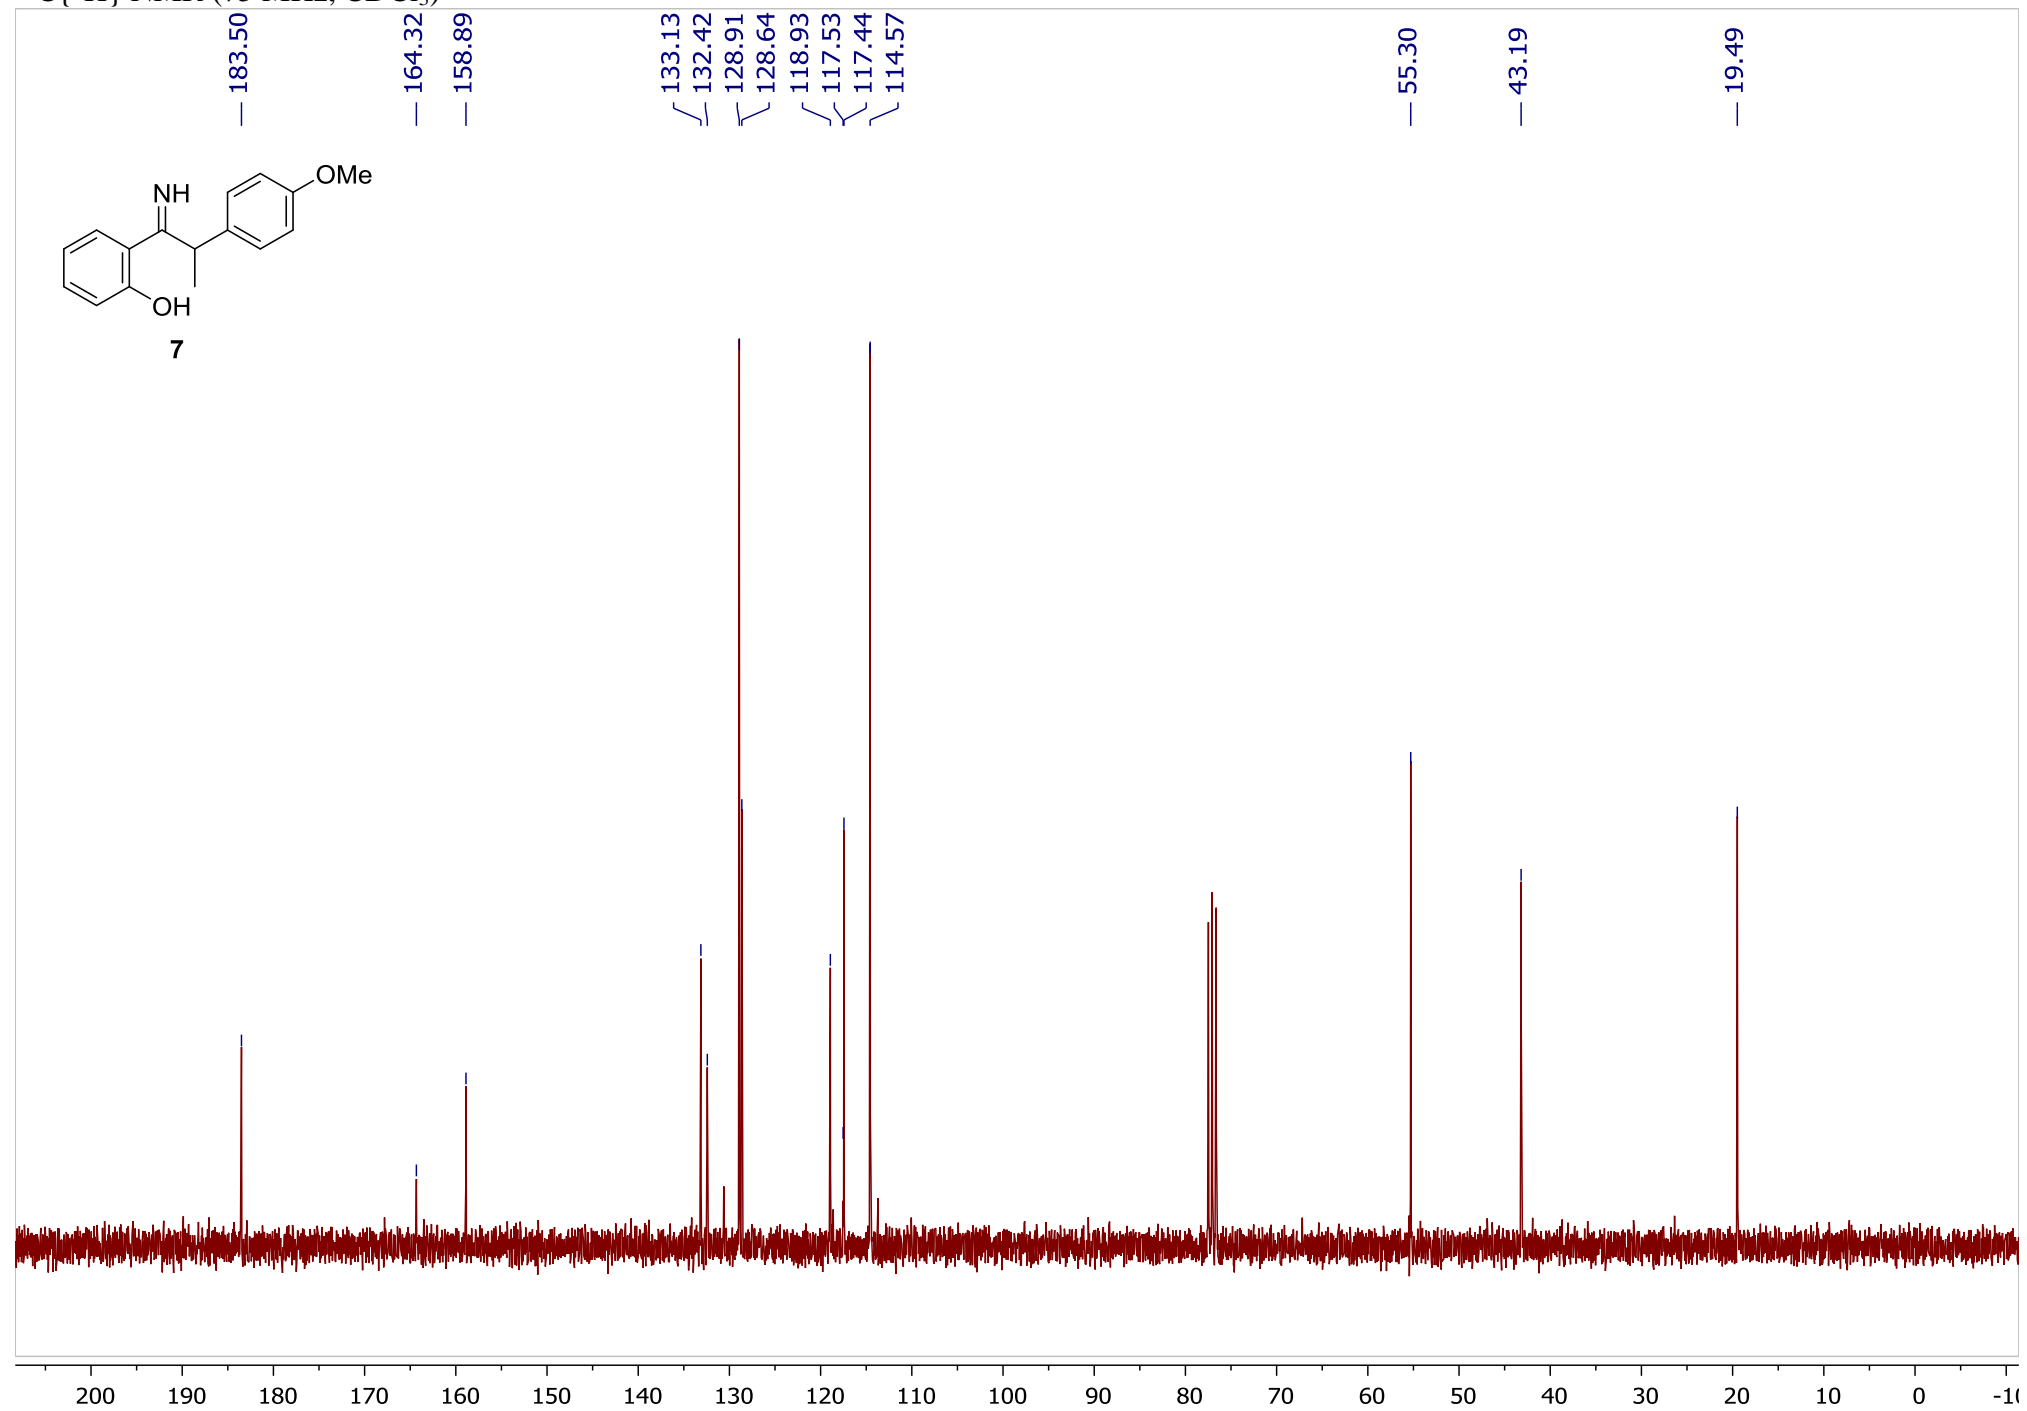

<sup>13</sup>C DEPT 135 (75 MHz, CDCl<sub>3</sub>)

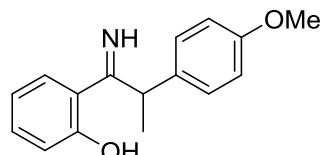

7

133.13  
128.92  
128.64

118.94  
117.44  
114.57

55.30

43.19

19.49

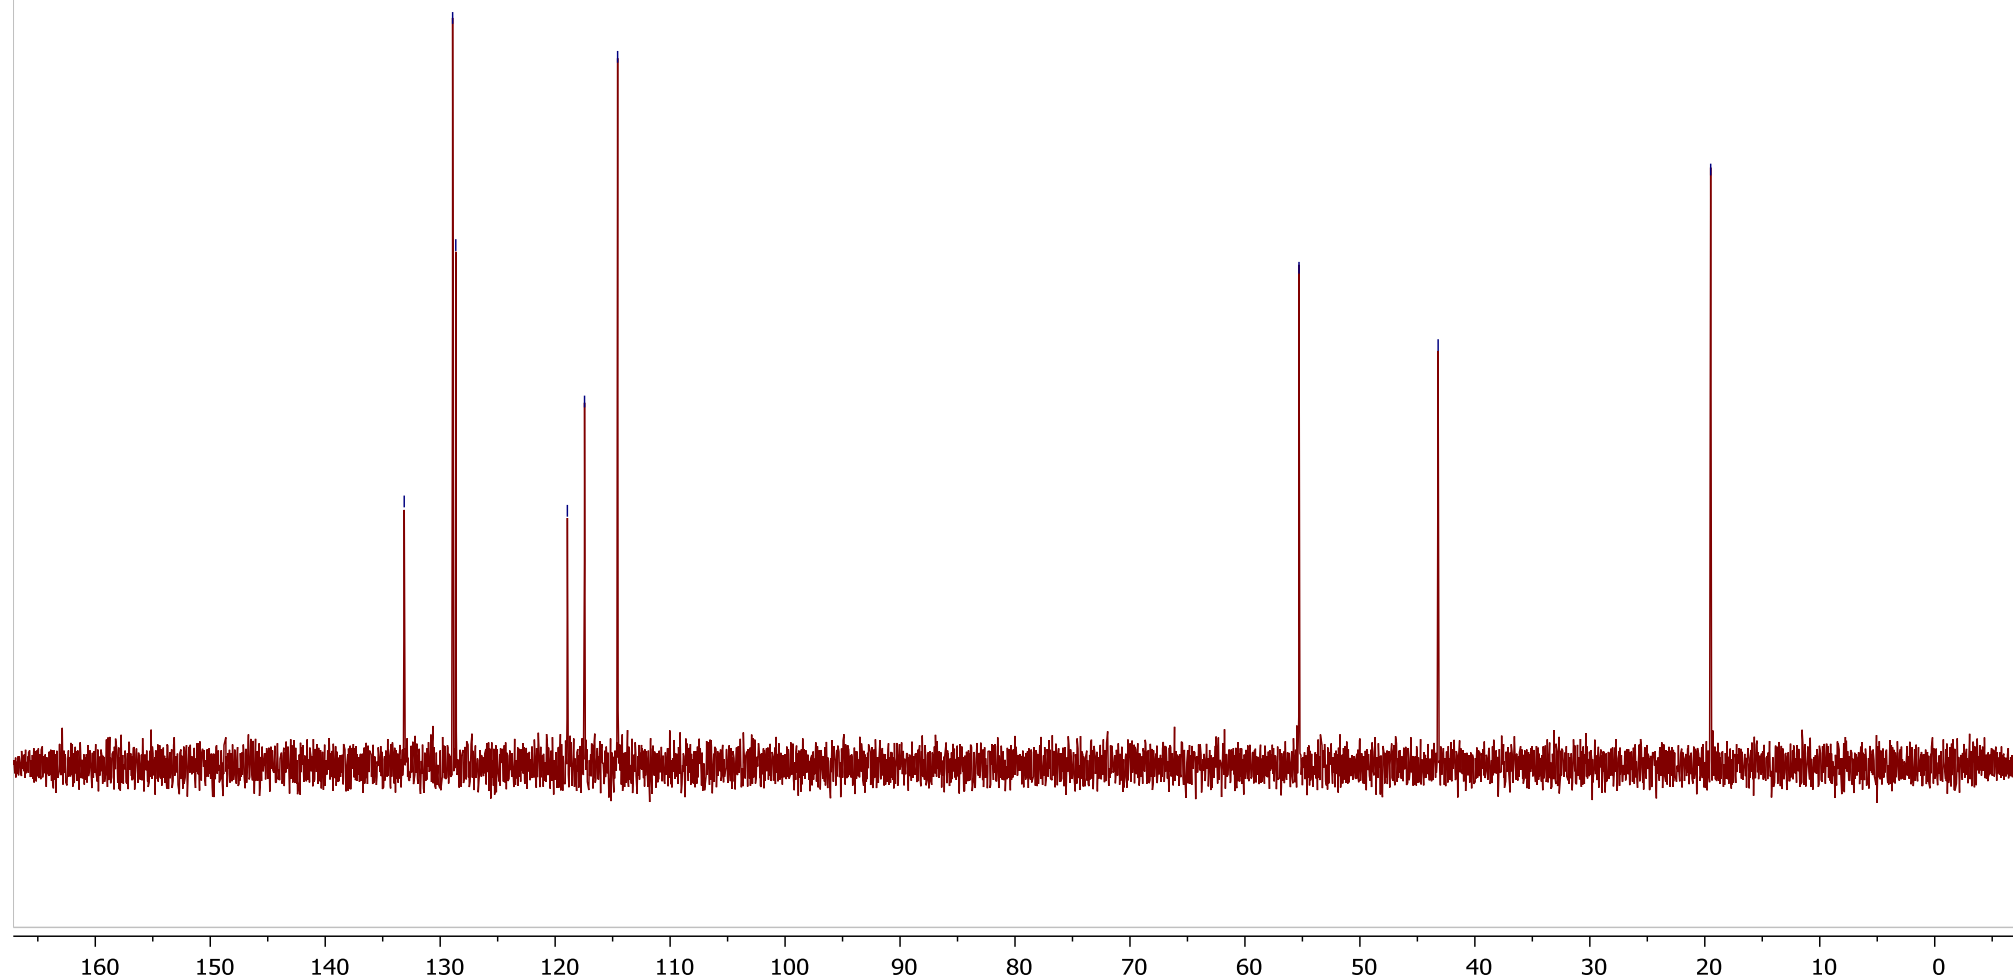

$^1\text{H}$ - $^1\text{H}$  COSY

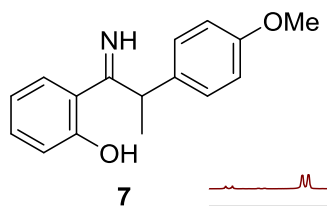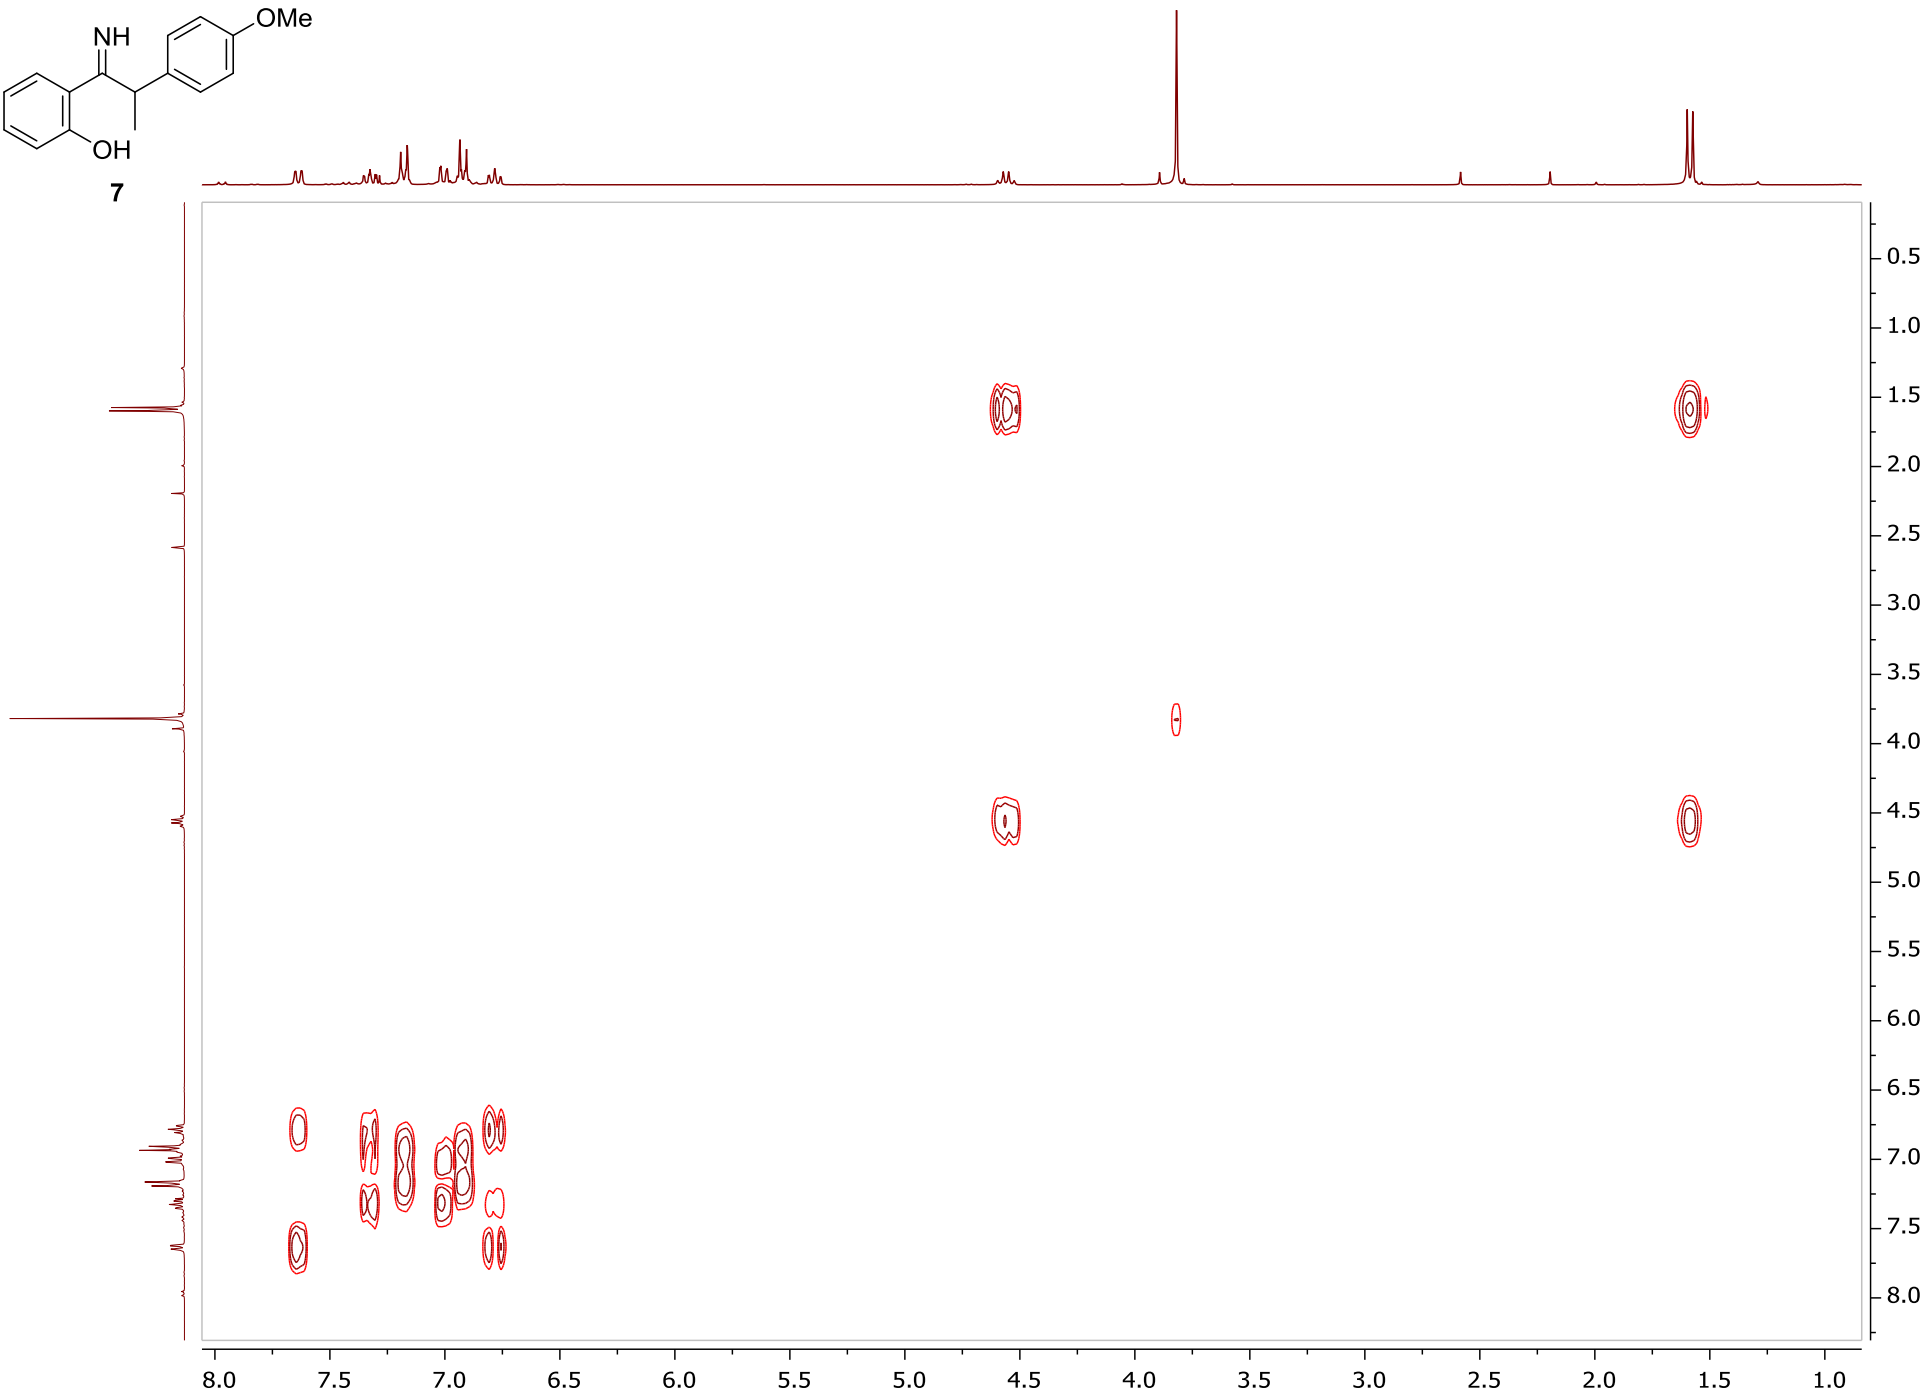



$^1\text{H}$ - $^{13}\text{C}$  HSQC

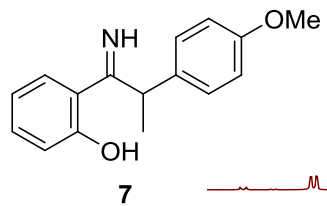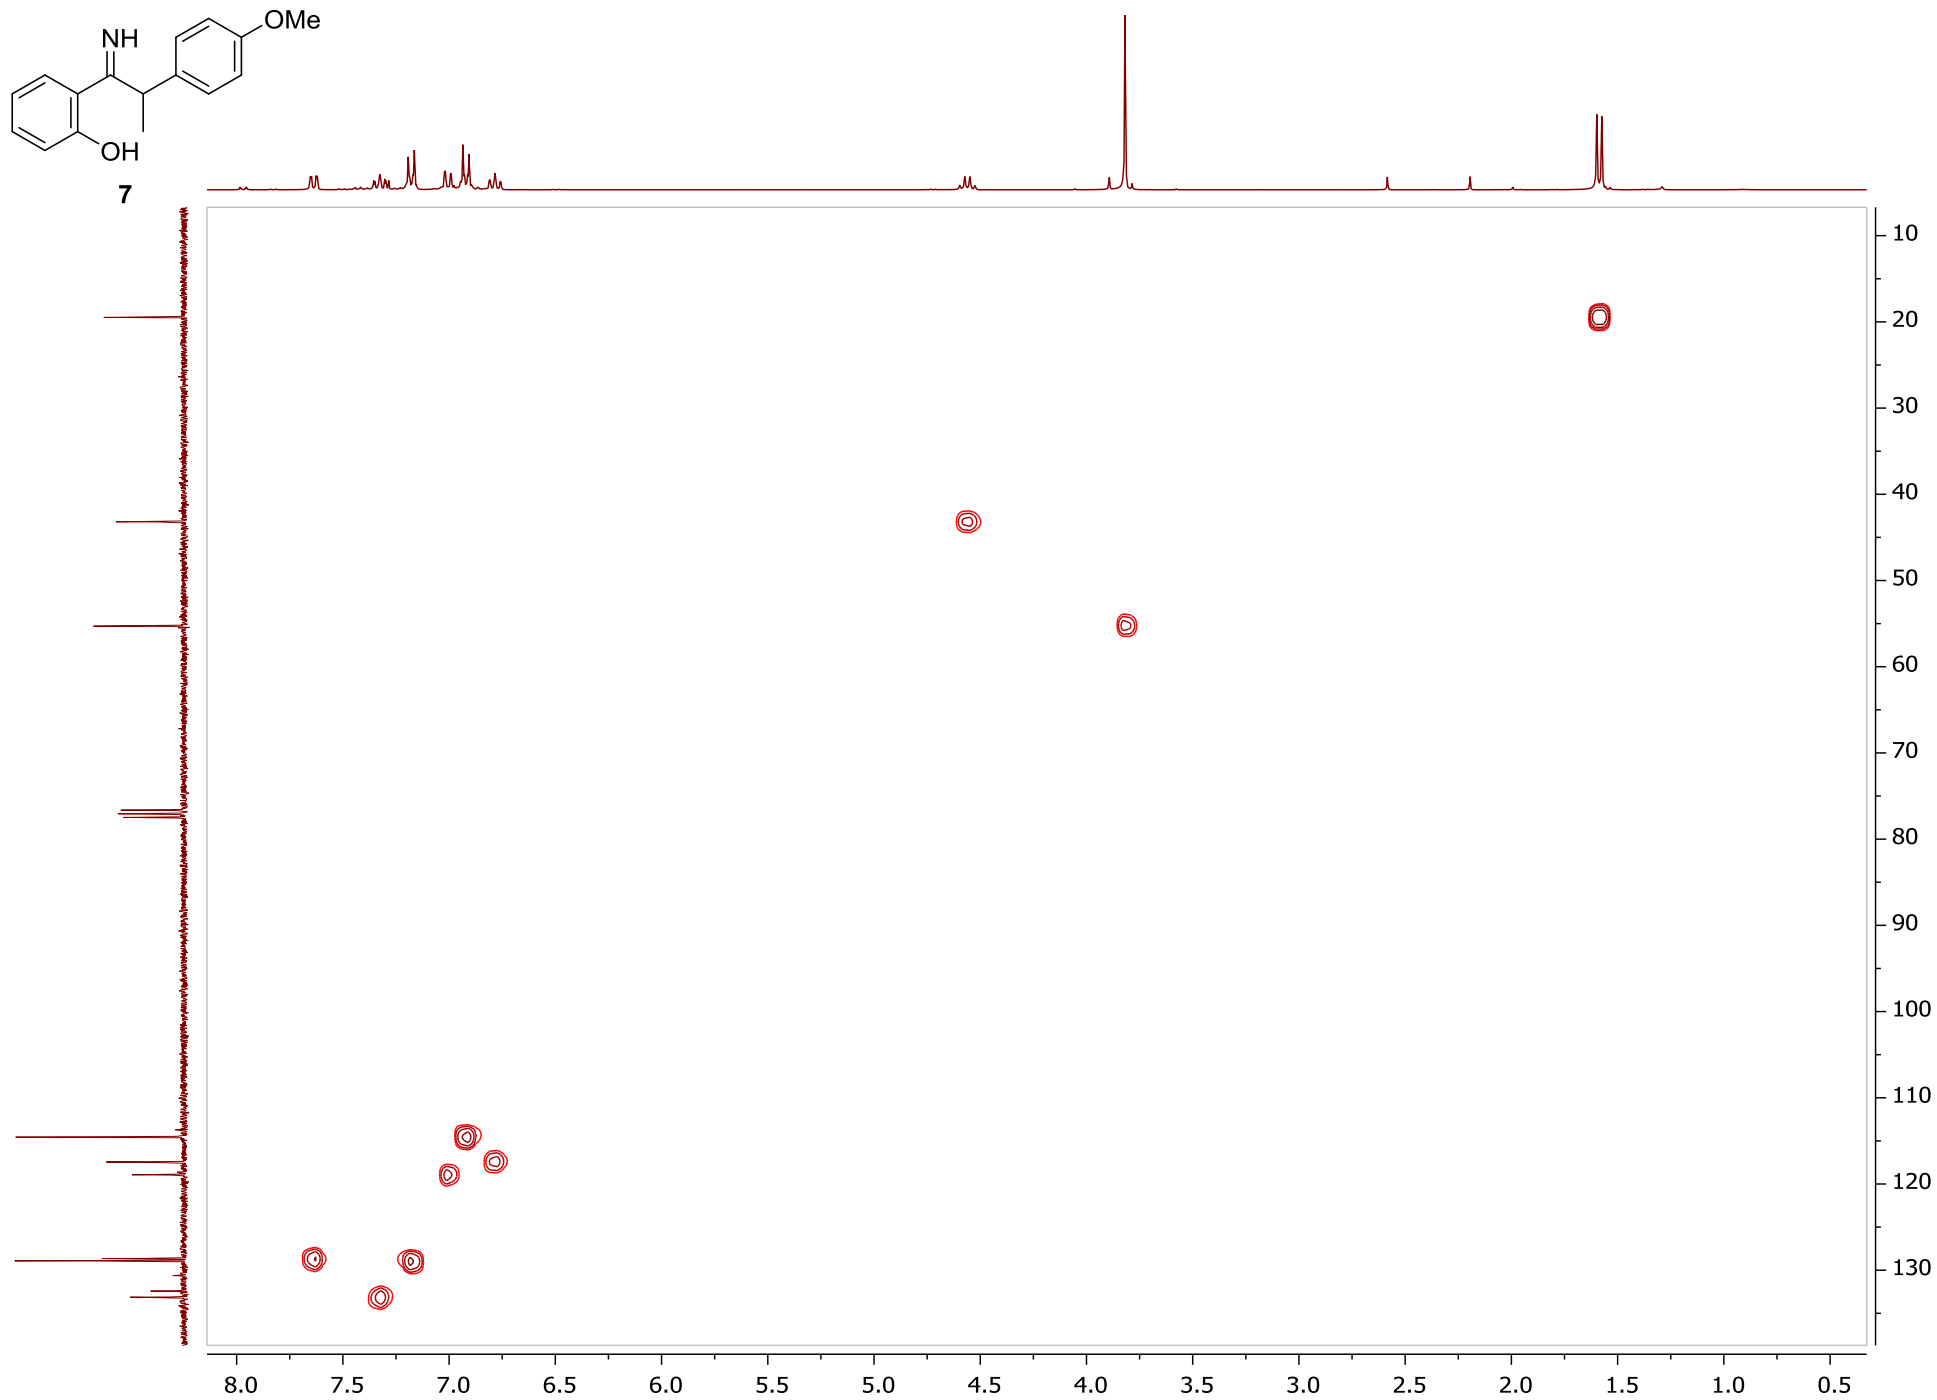

$^1\text{H}-^{13}\text{C}$  HMBC

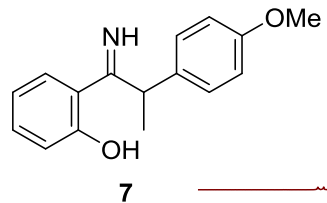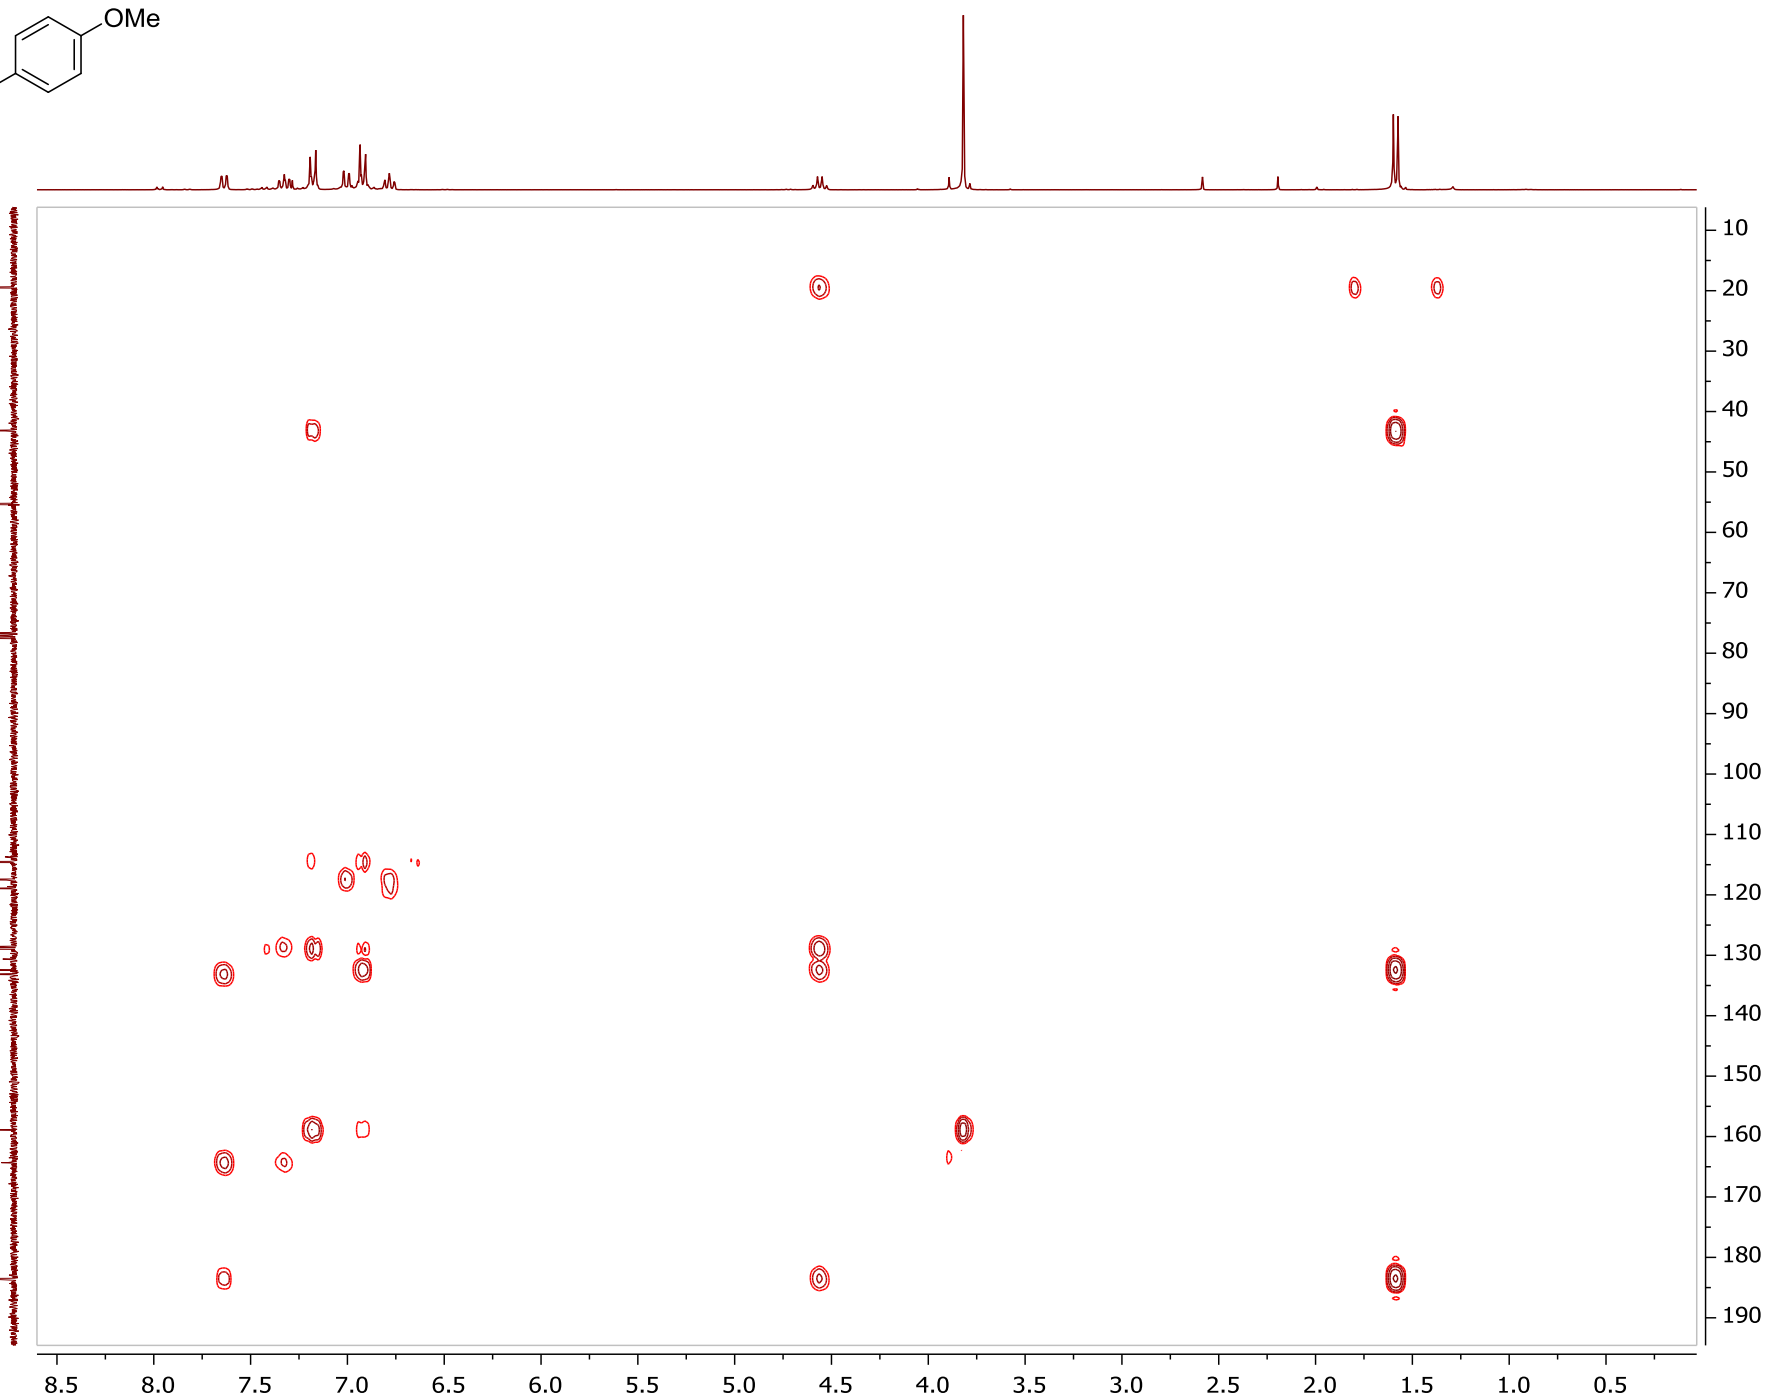

**1-(2-Hydroxyphenyl)-2-(4-methoxyphenyl)propan-1-one 8**

<sup>1</sup>H NMR (300 MHz, CDCl<sub>3</sub>)

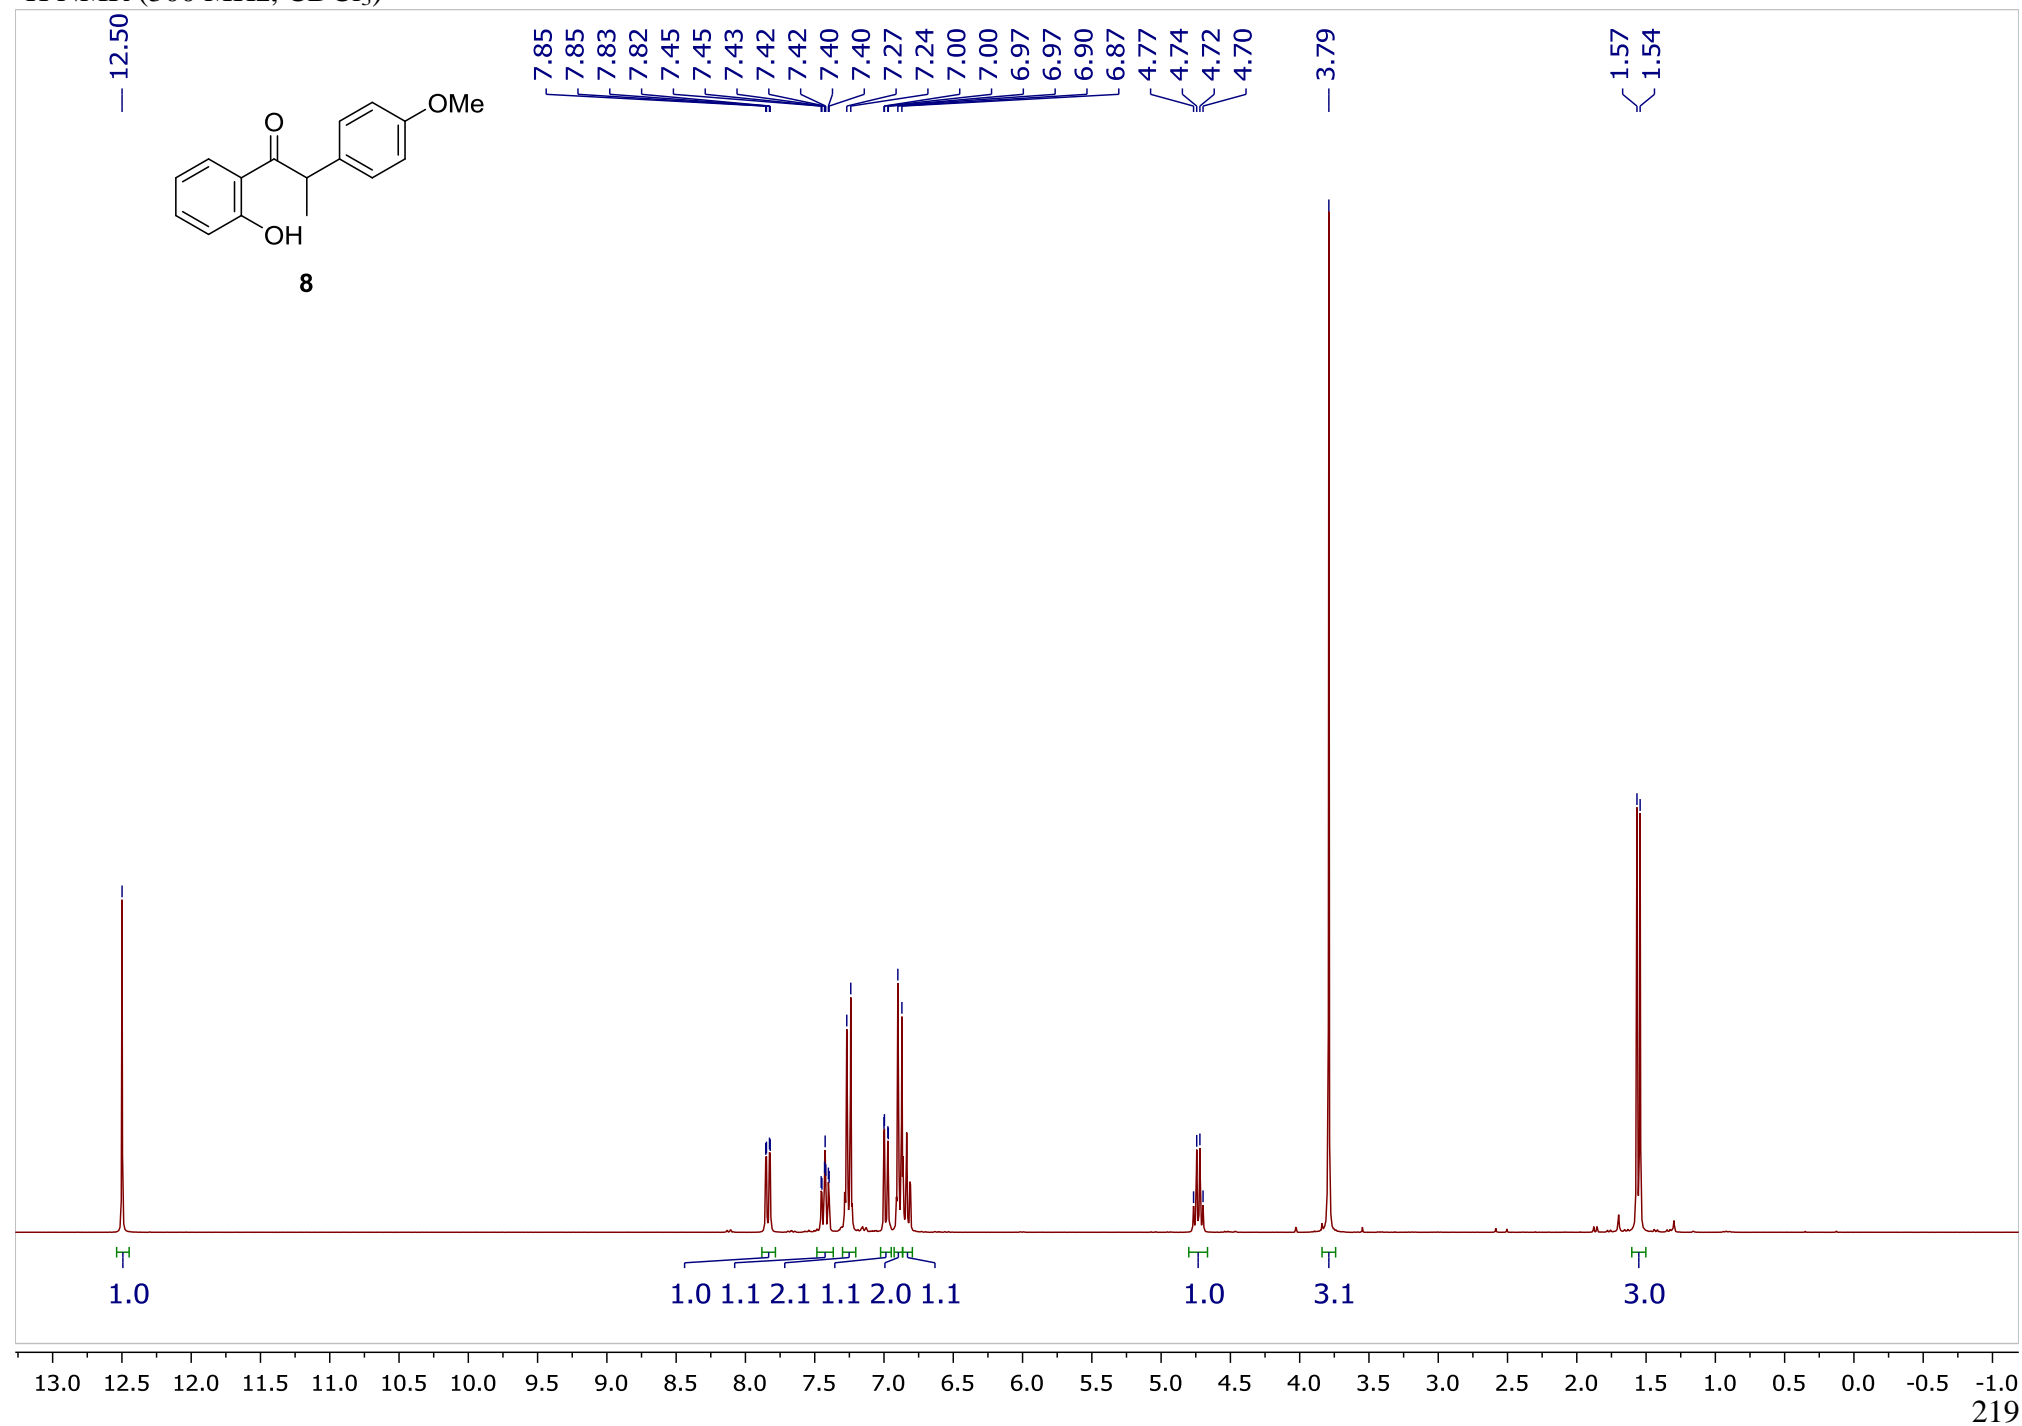

$^{13}\text{C}\{^1\text{H}\}$  NMR (75 MHz,  $\text{CDCl}_3$ )

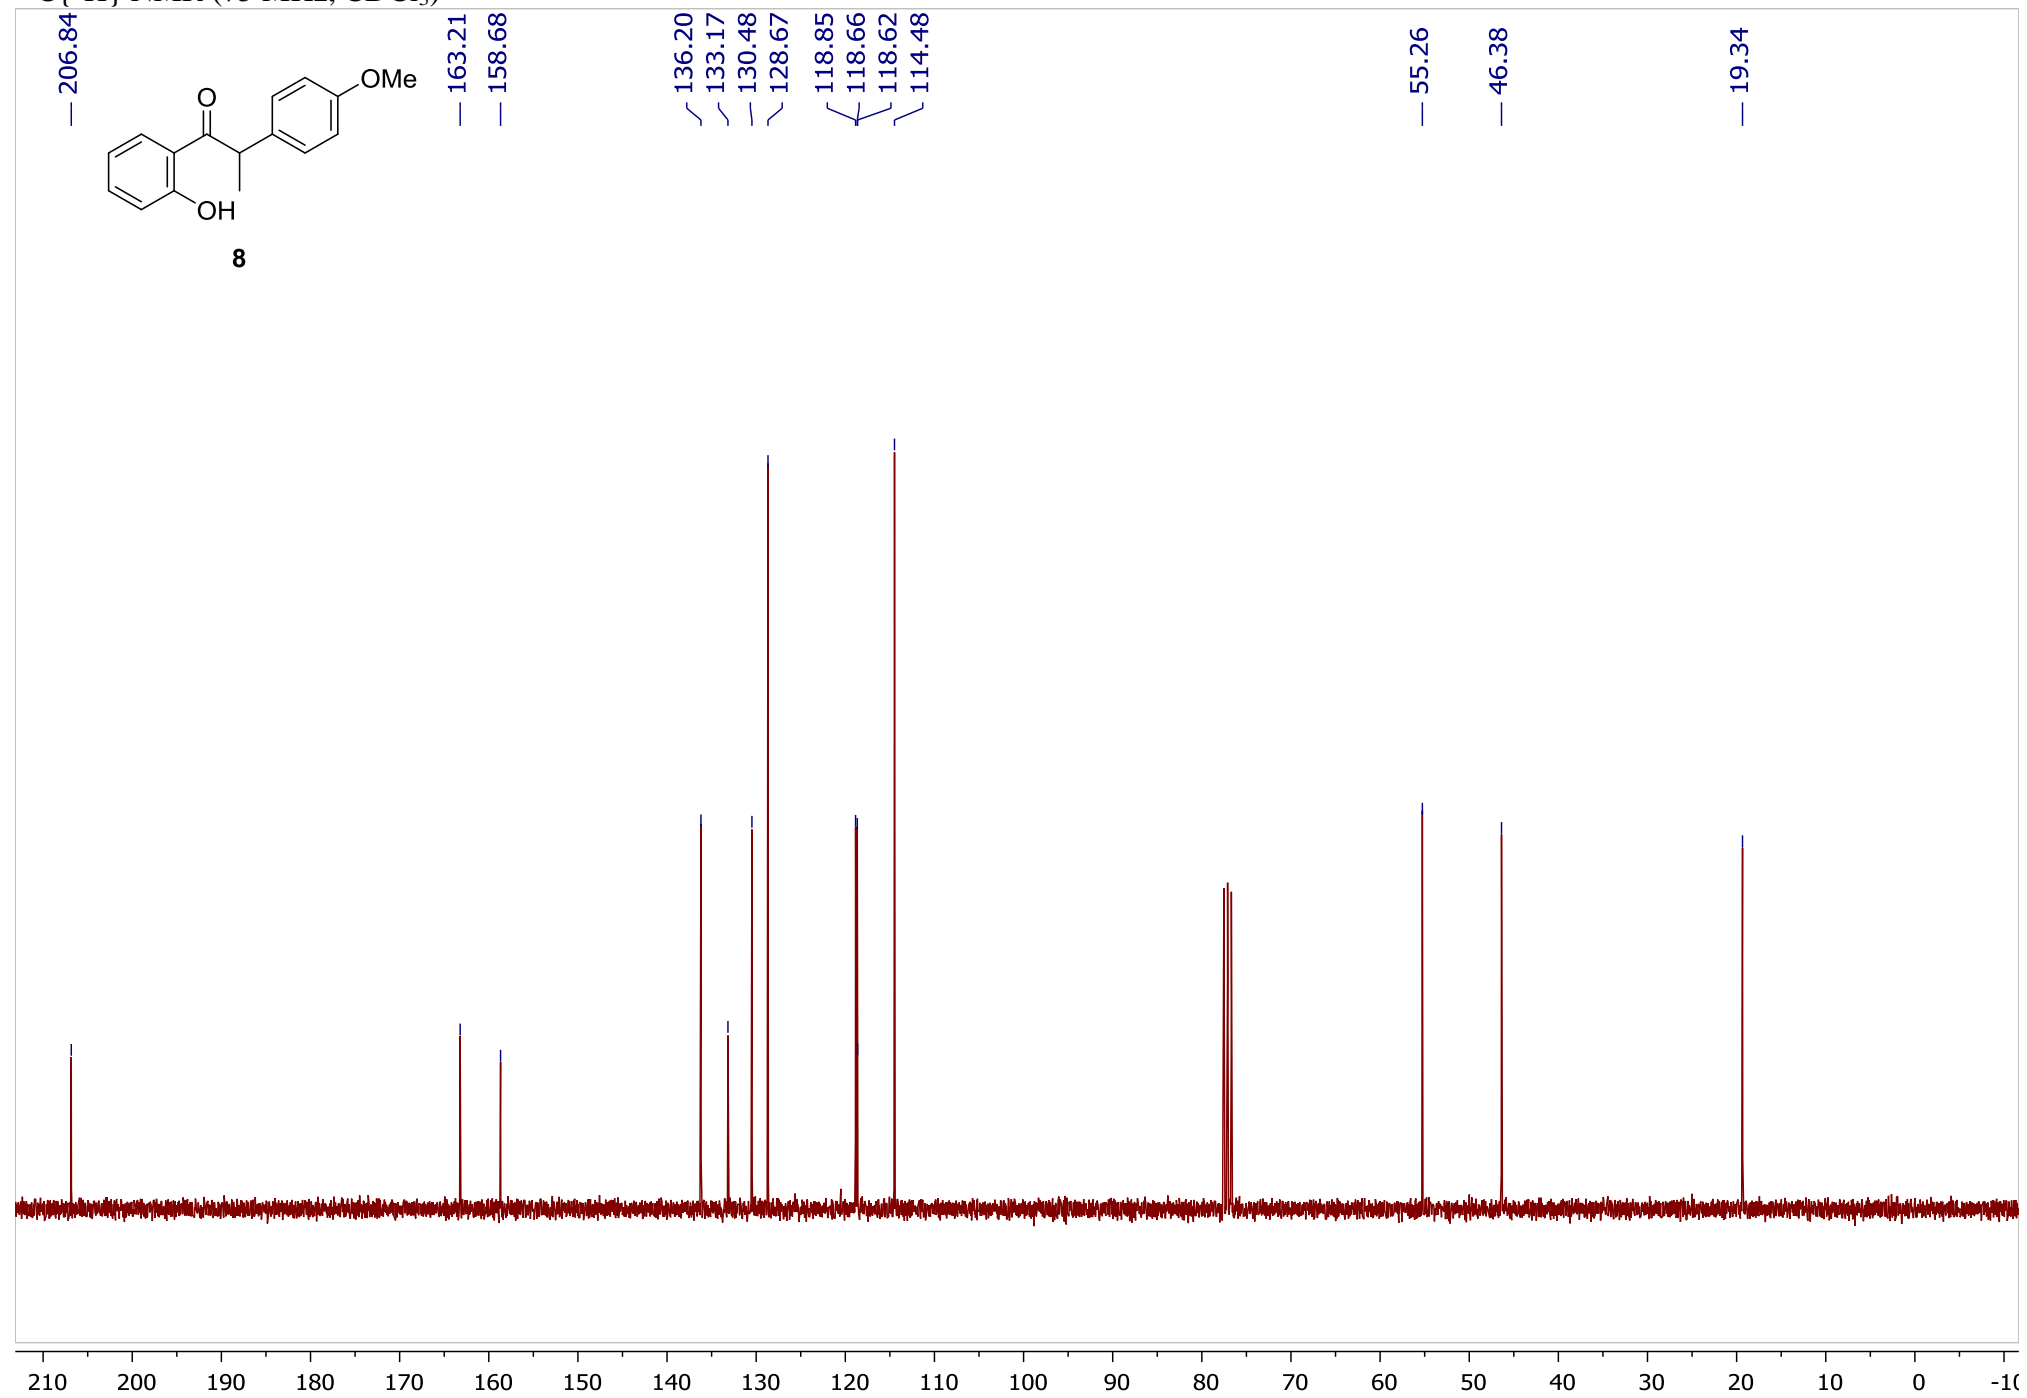

<sup>13</sup>C DEPT 135 (75 MHz, CDCl<sub>3</sub>)

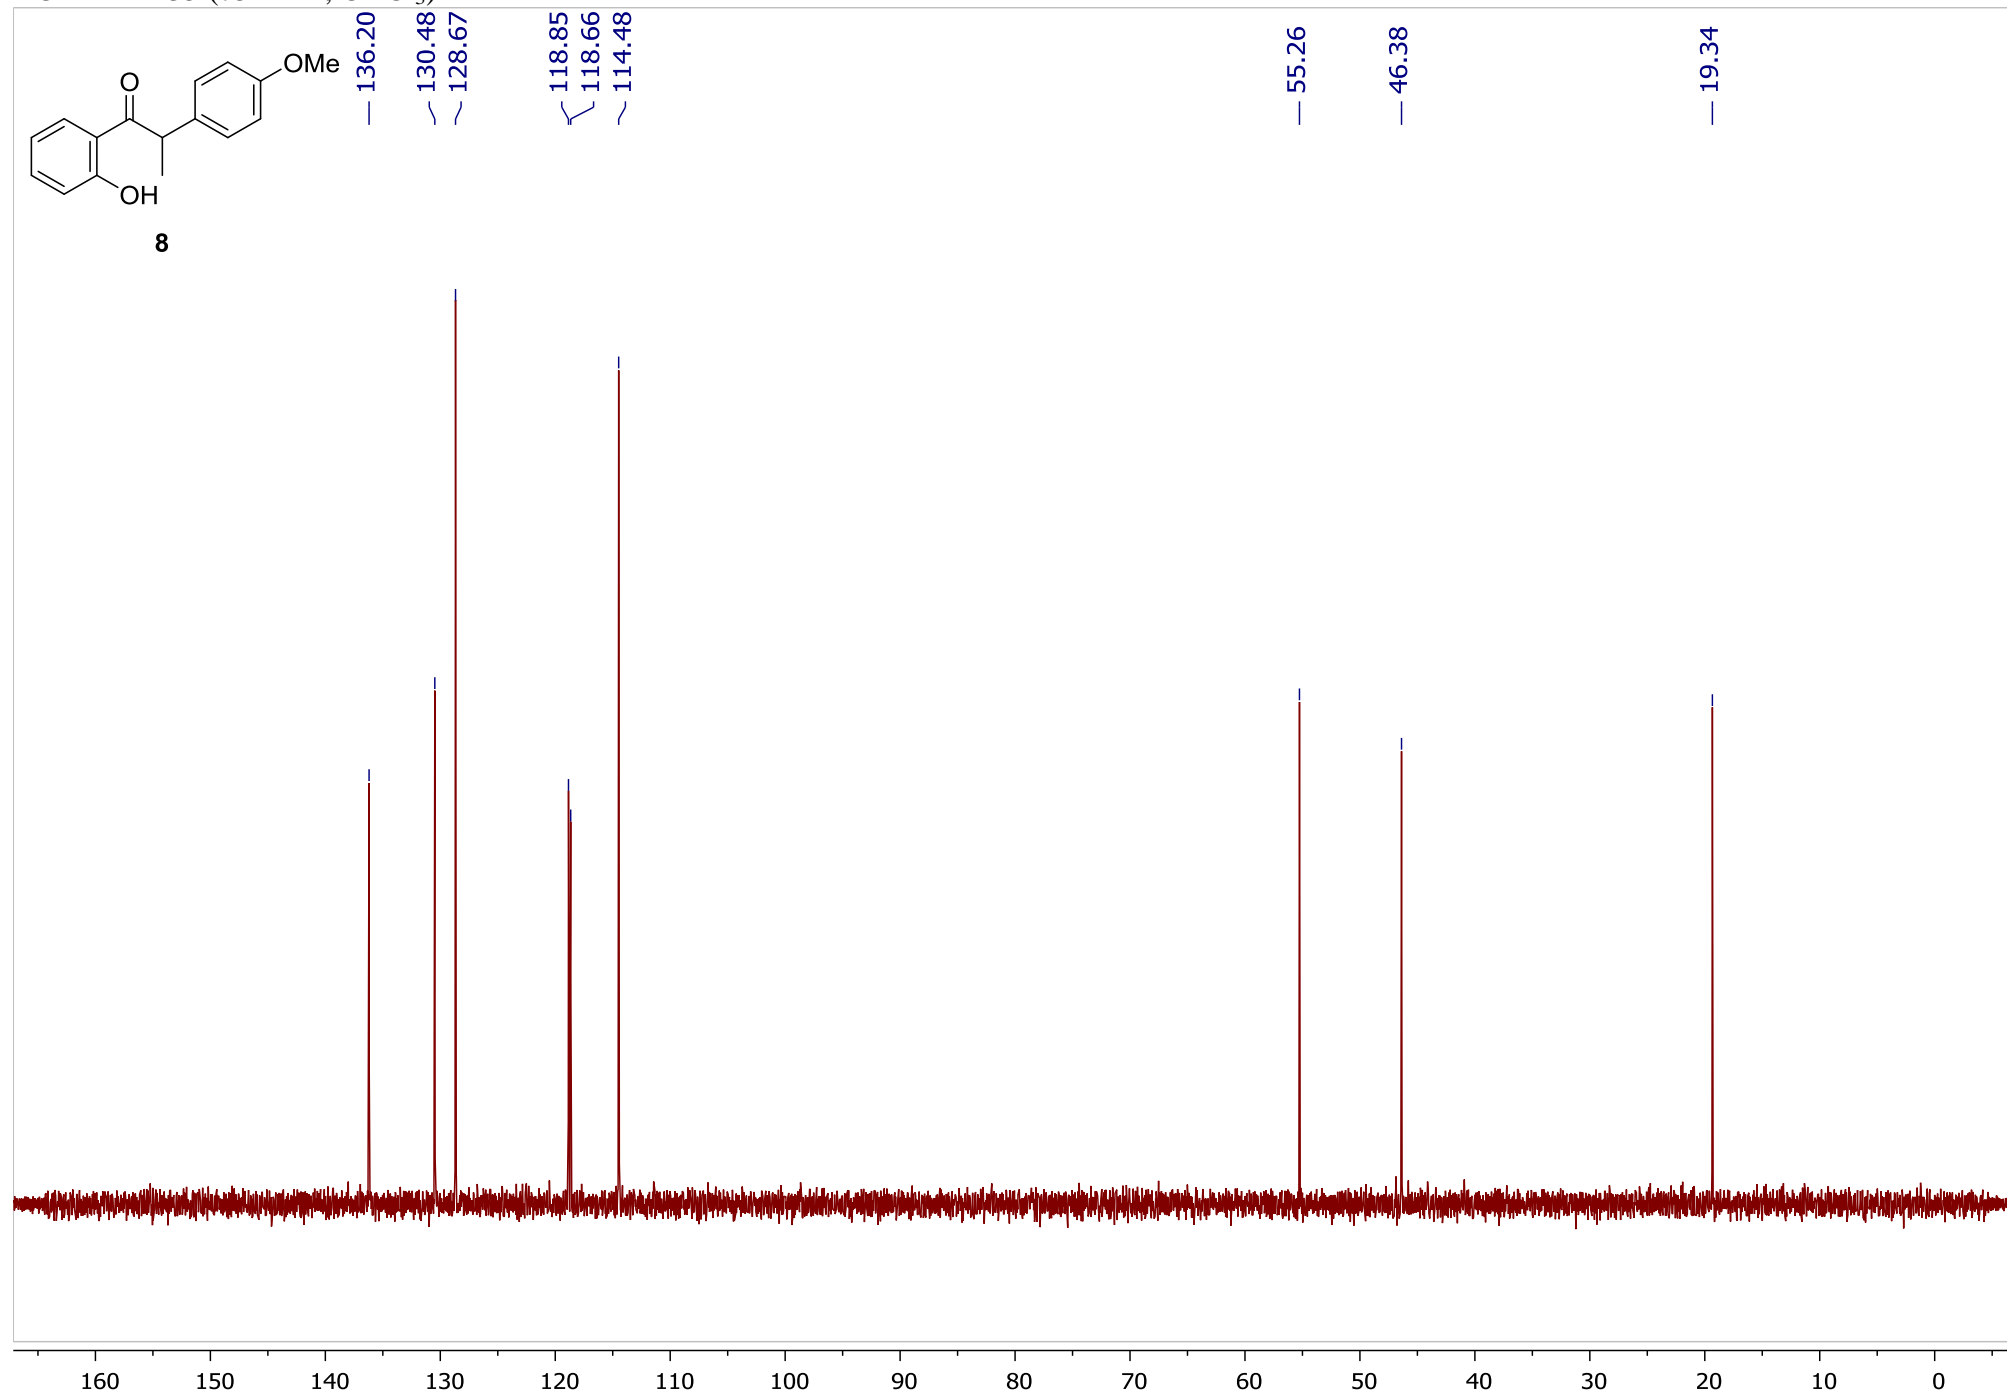

$^1\text{H}$ - $^1\text{H}$  COSY

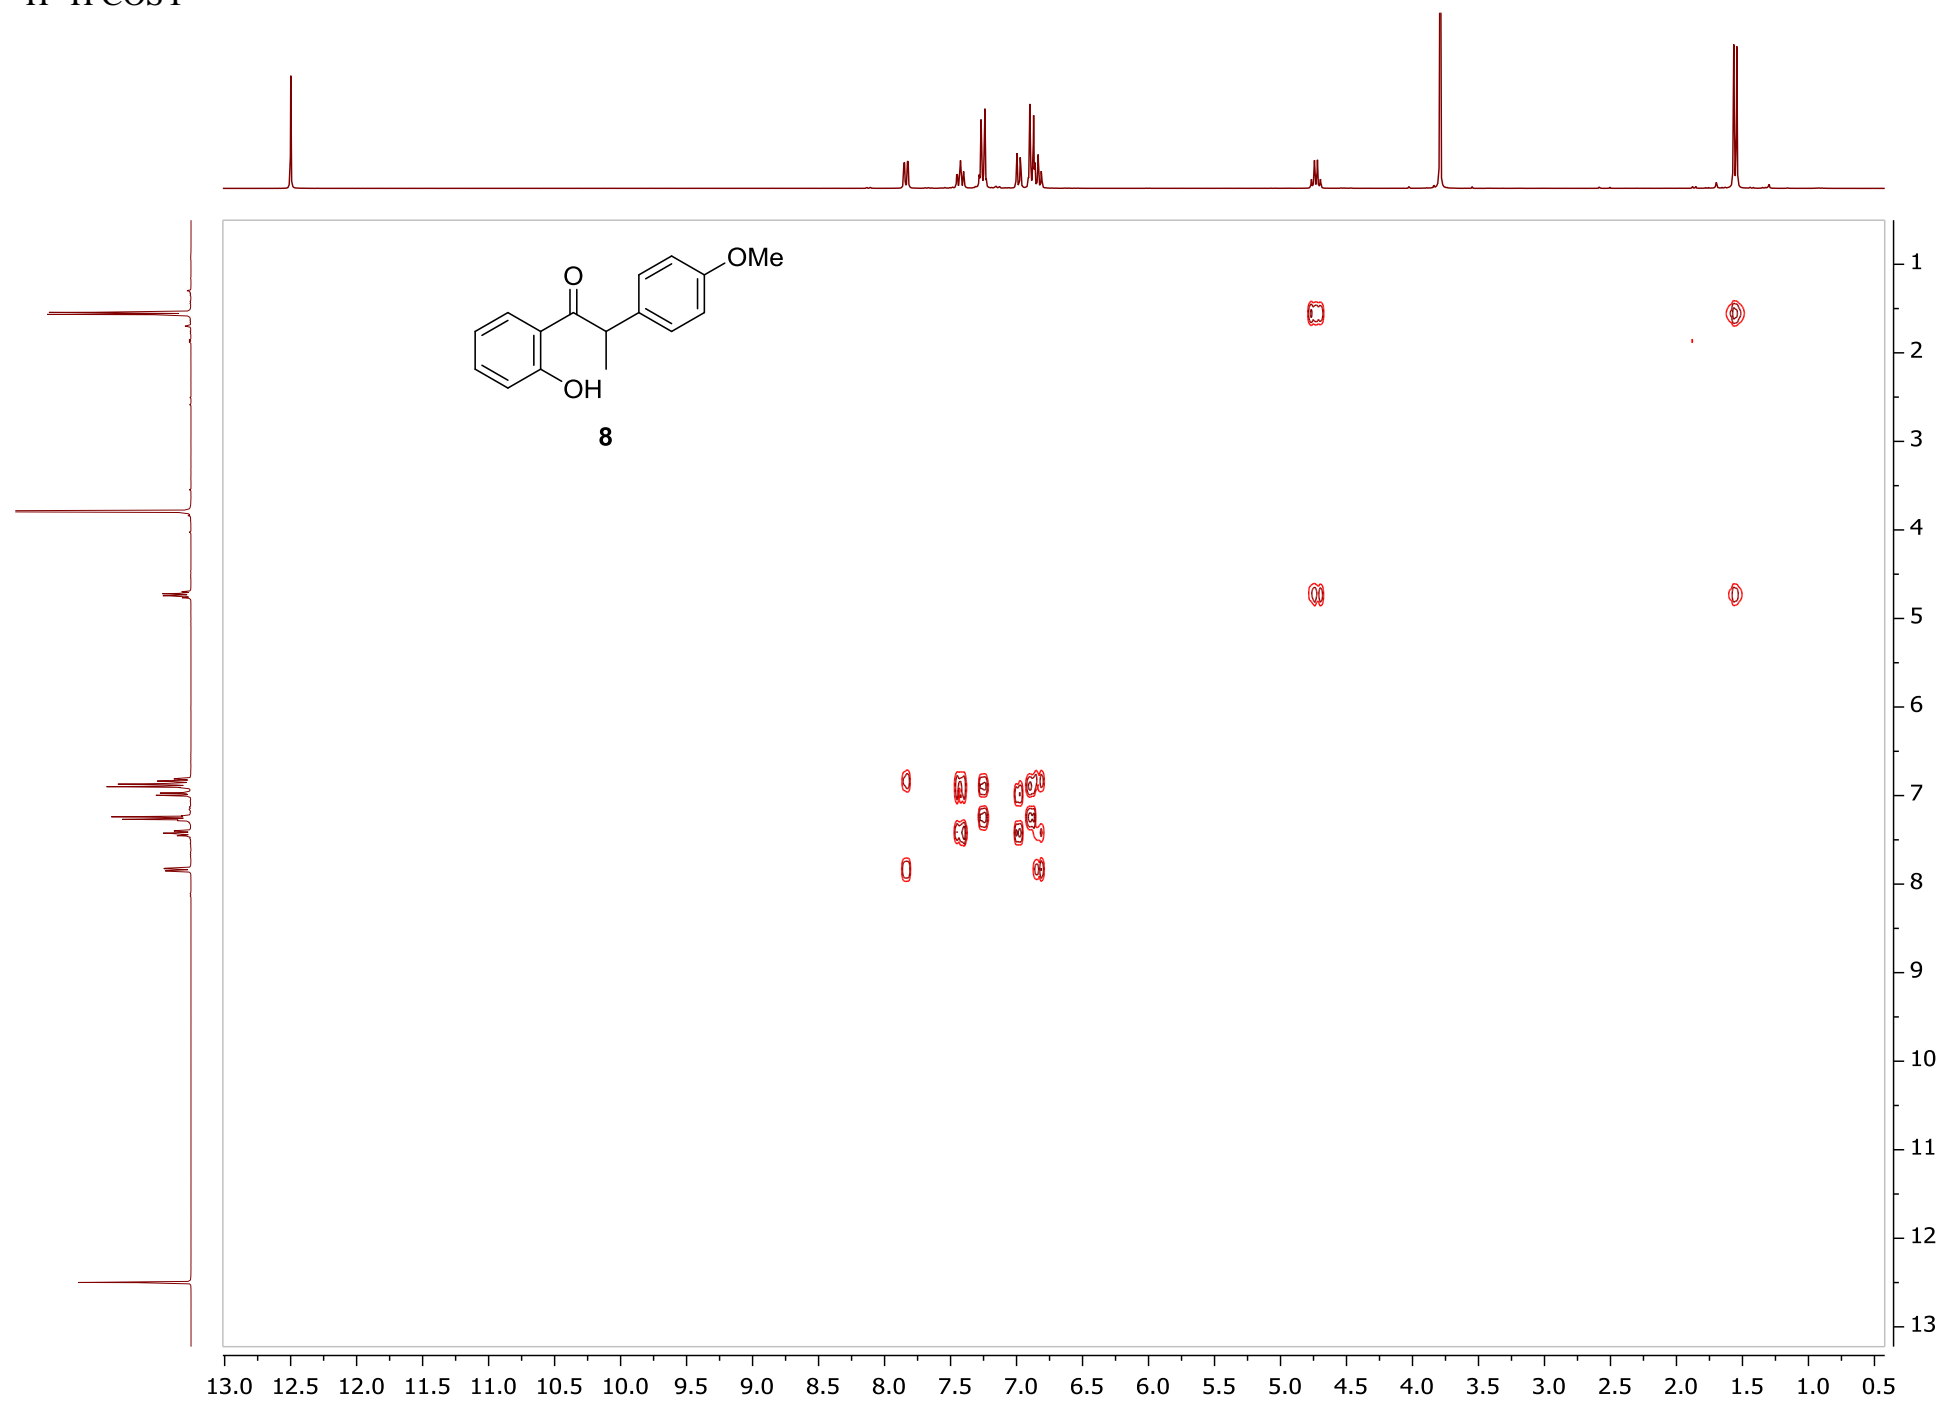

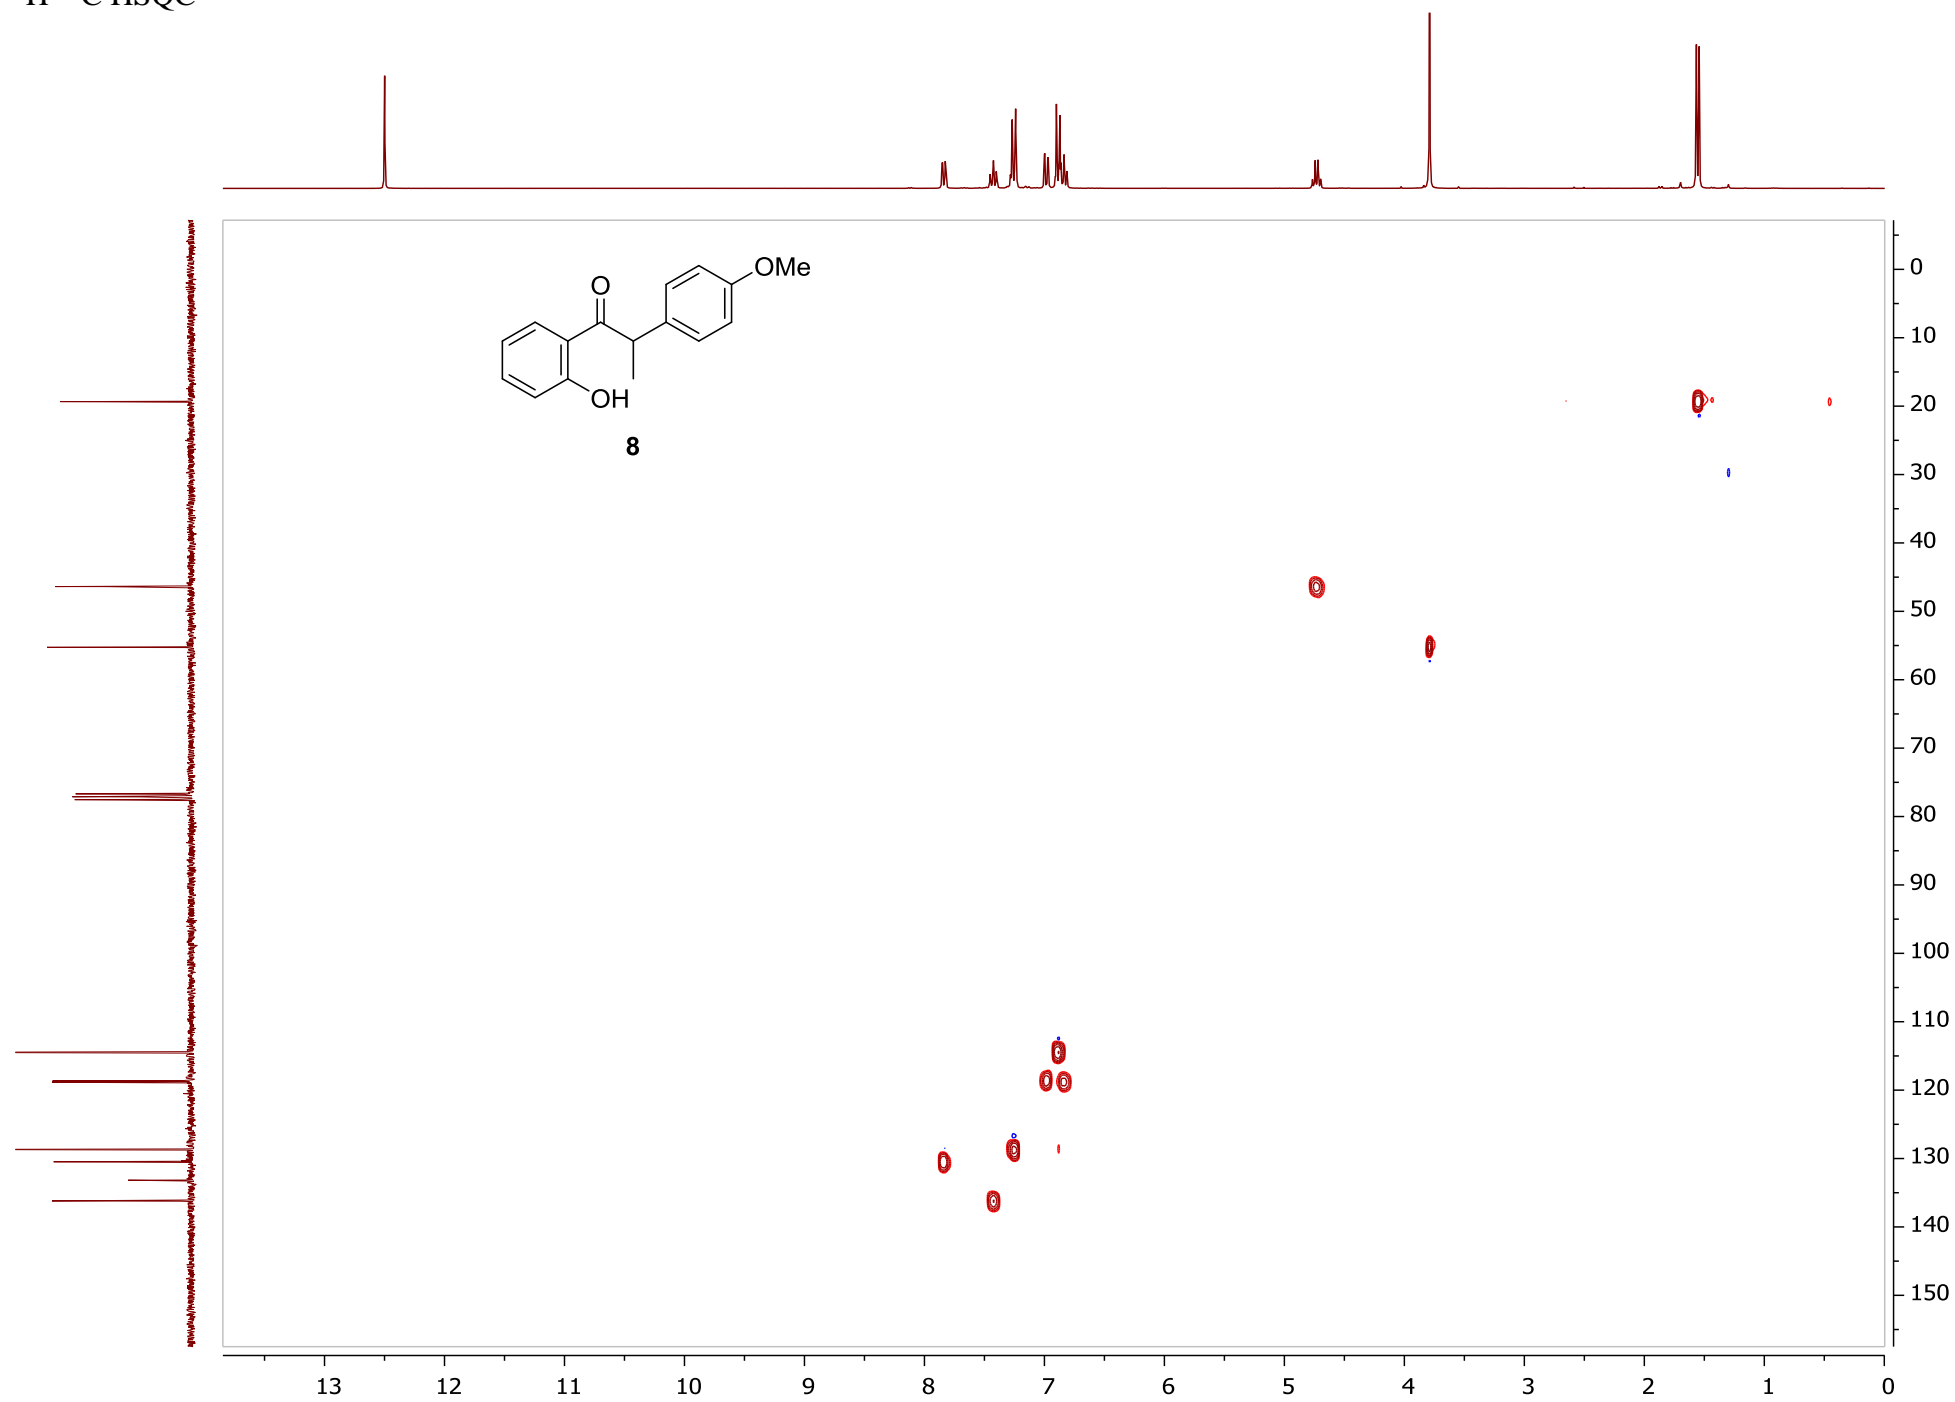

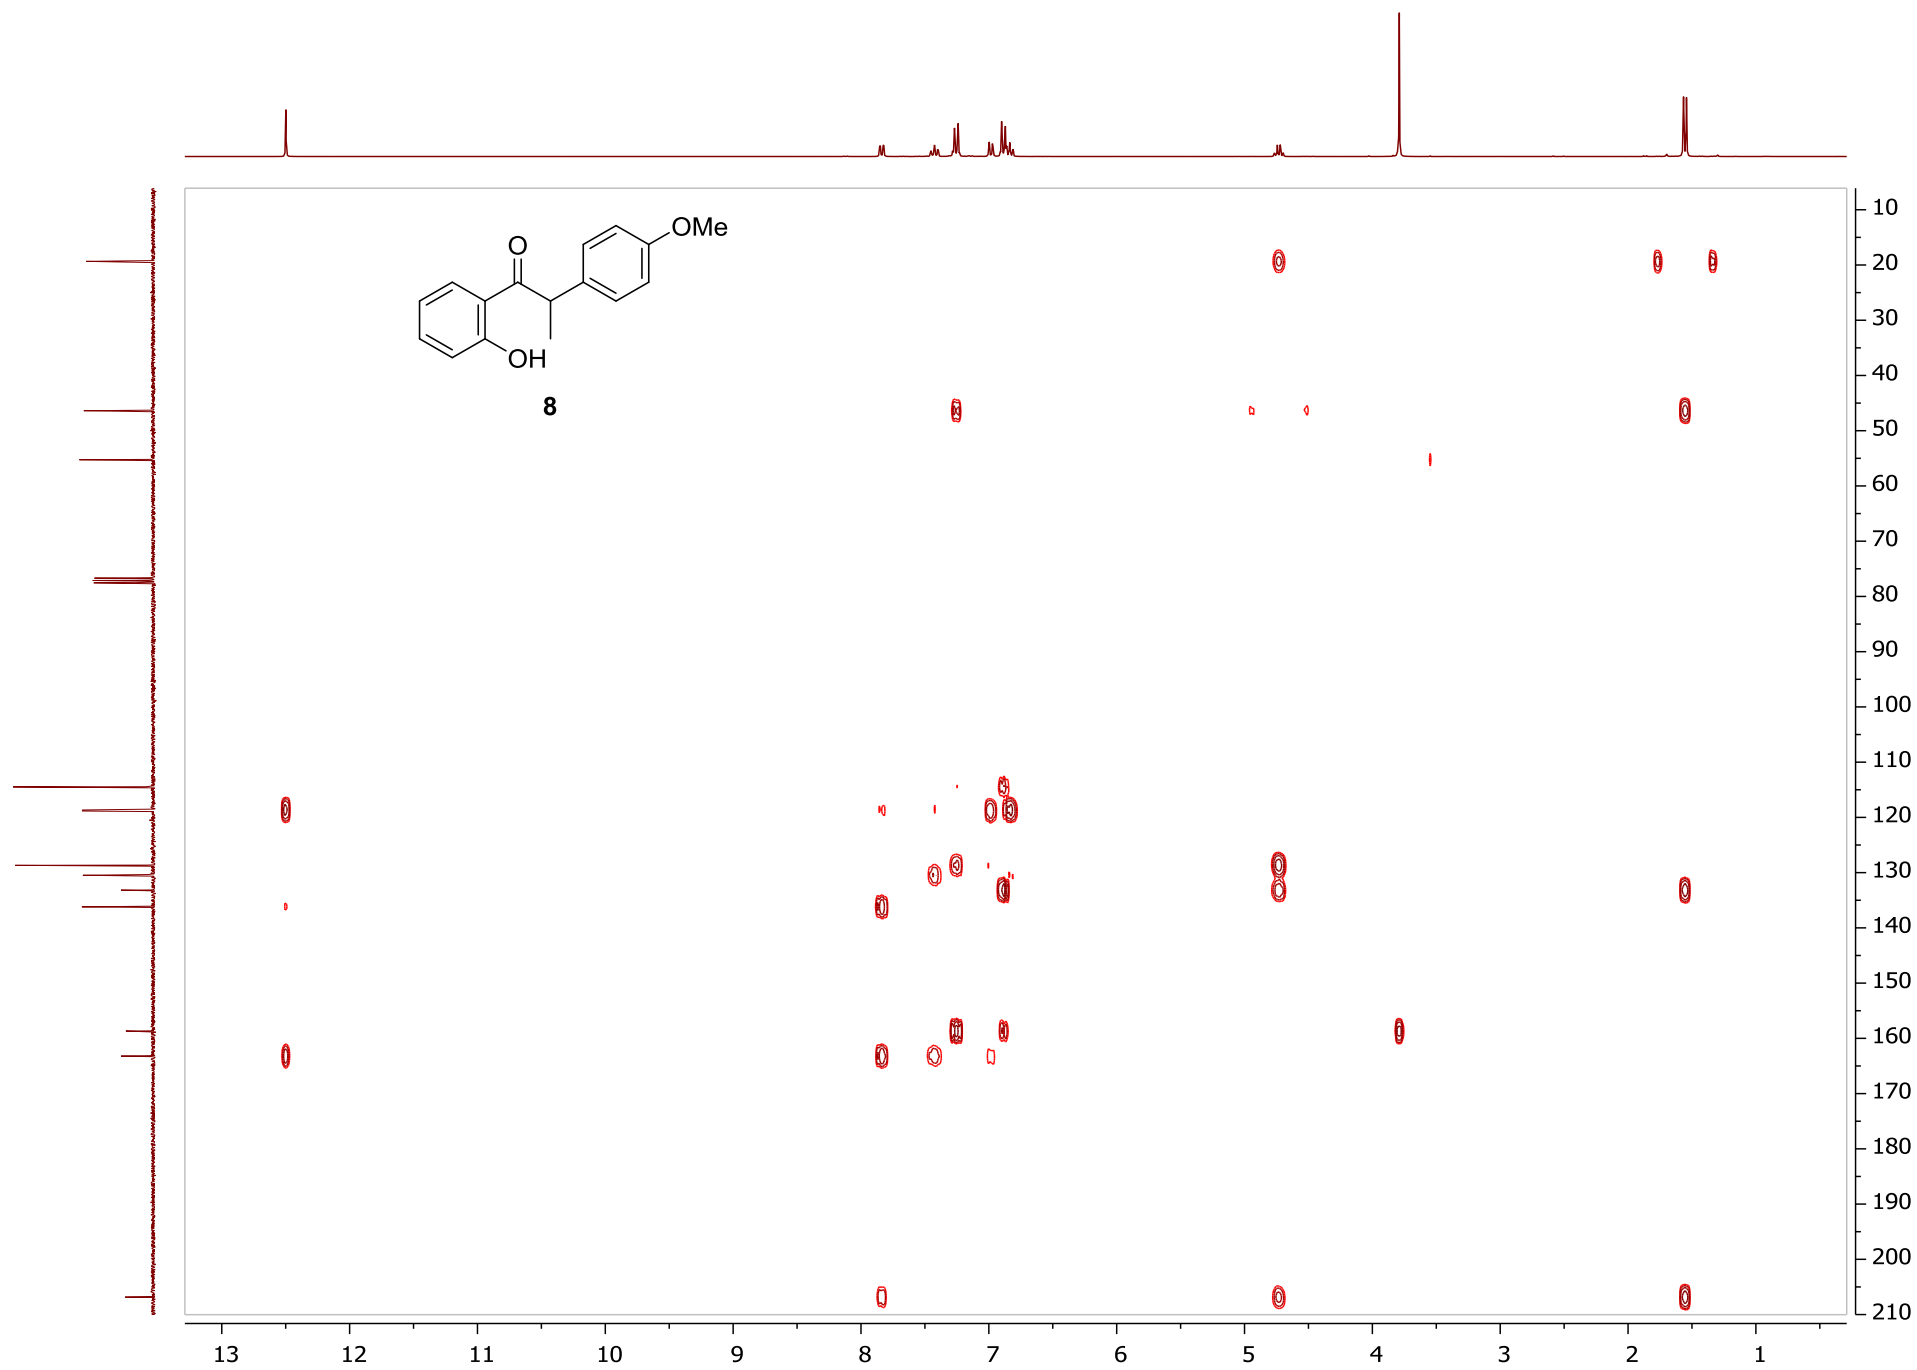



# 3-(4-Methoxyphenyl)chroman-4-one 9

$^1\text{H}$  NMR (300 MHz,  $\text{CDCl}_3$ )

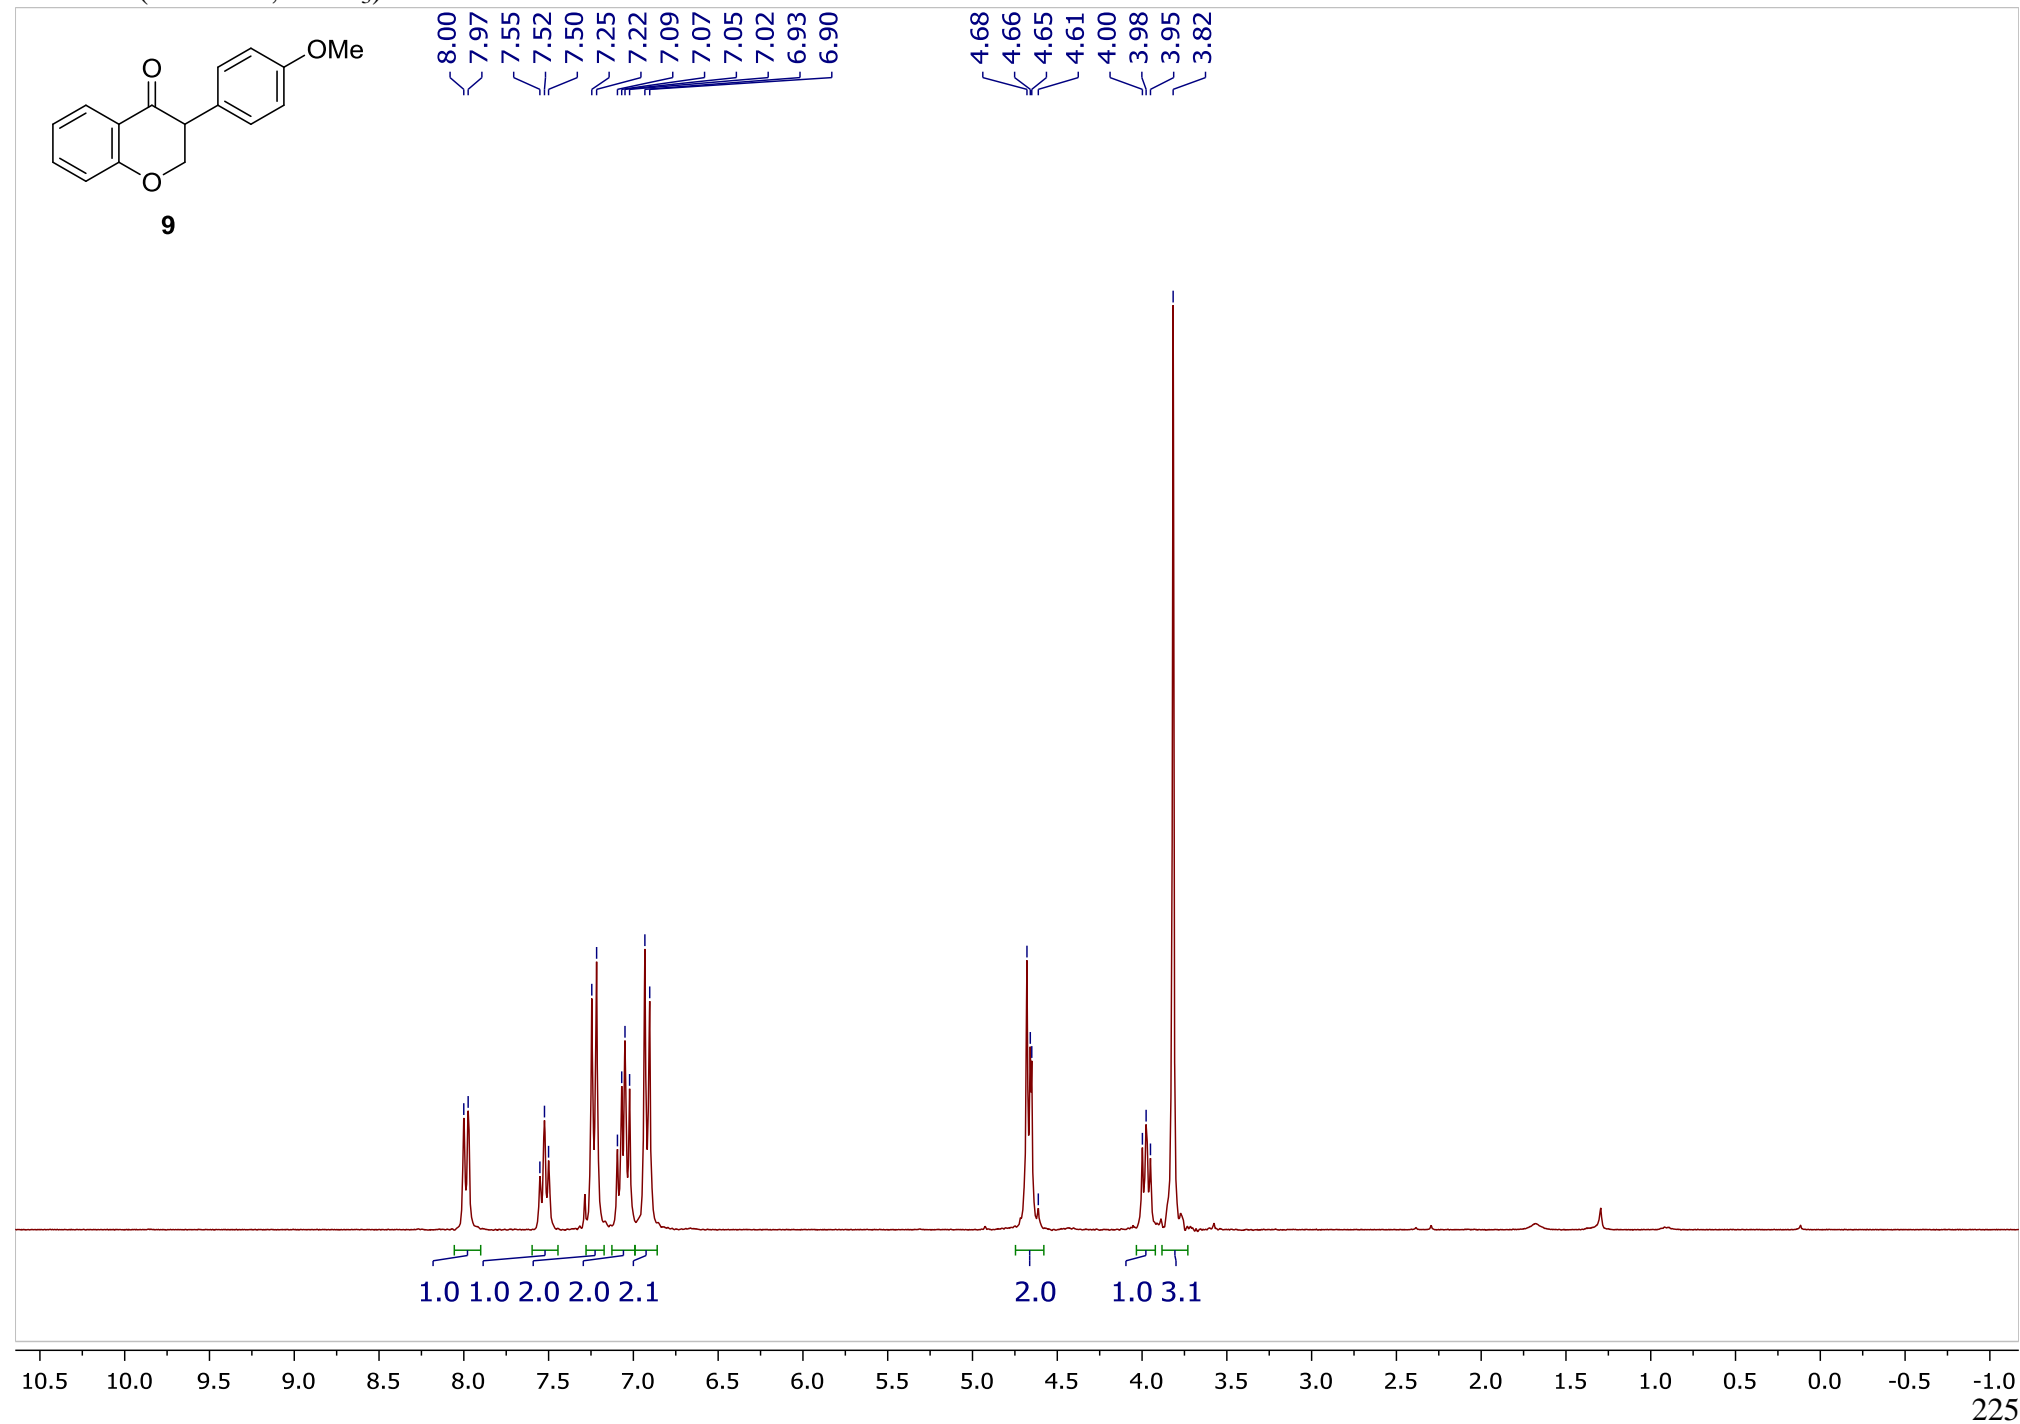

**2-(Benzo[d]isoxazol-3-yl)-2-hydroxy-2-(4-methoxyphenyl)ethyl 3-chlorobenzoate 10**

<sup>1</sup>H NMR (300 MHz, CDCl<sub>3</sub>)

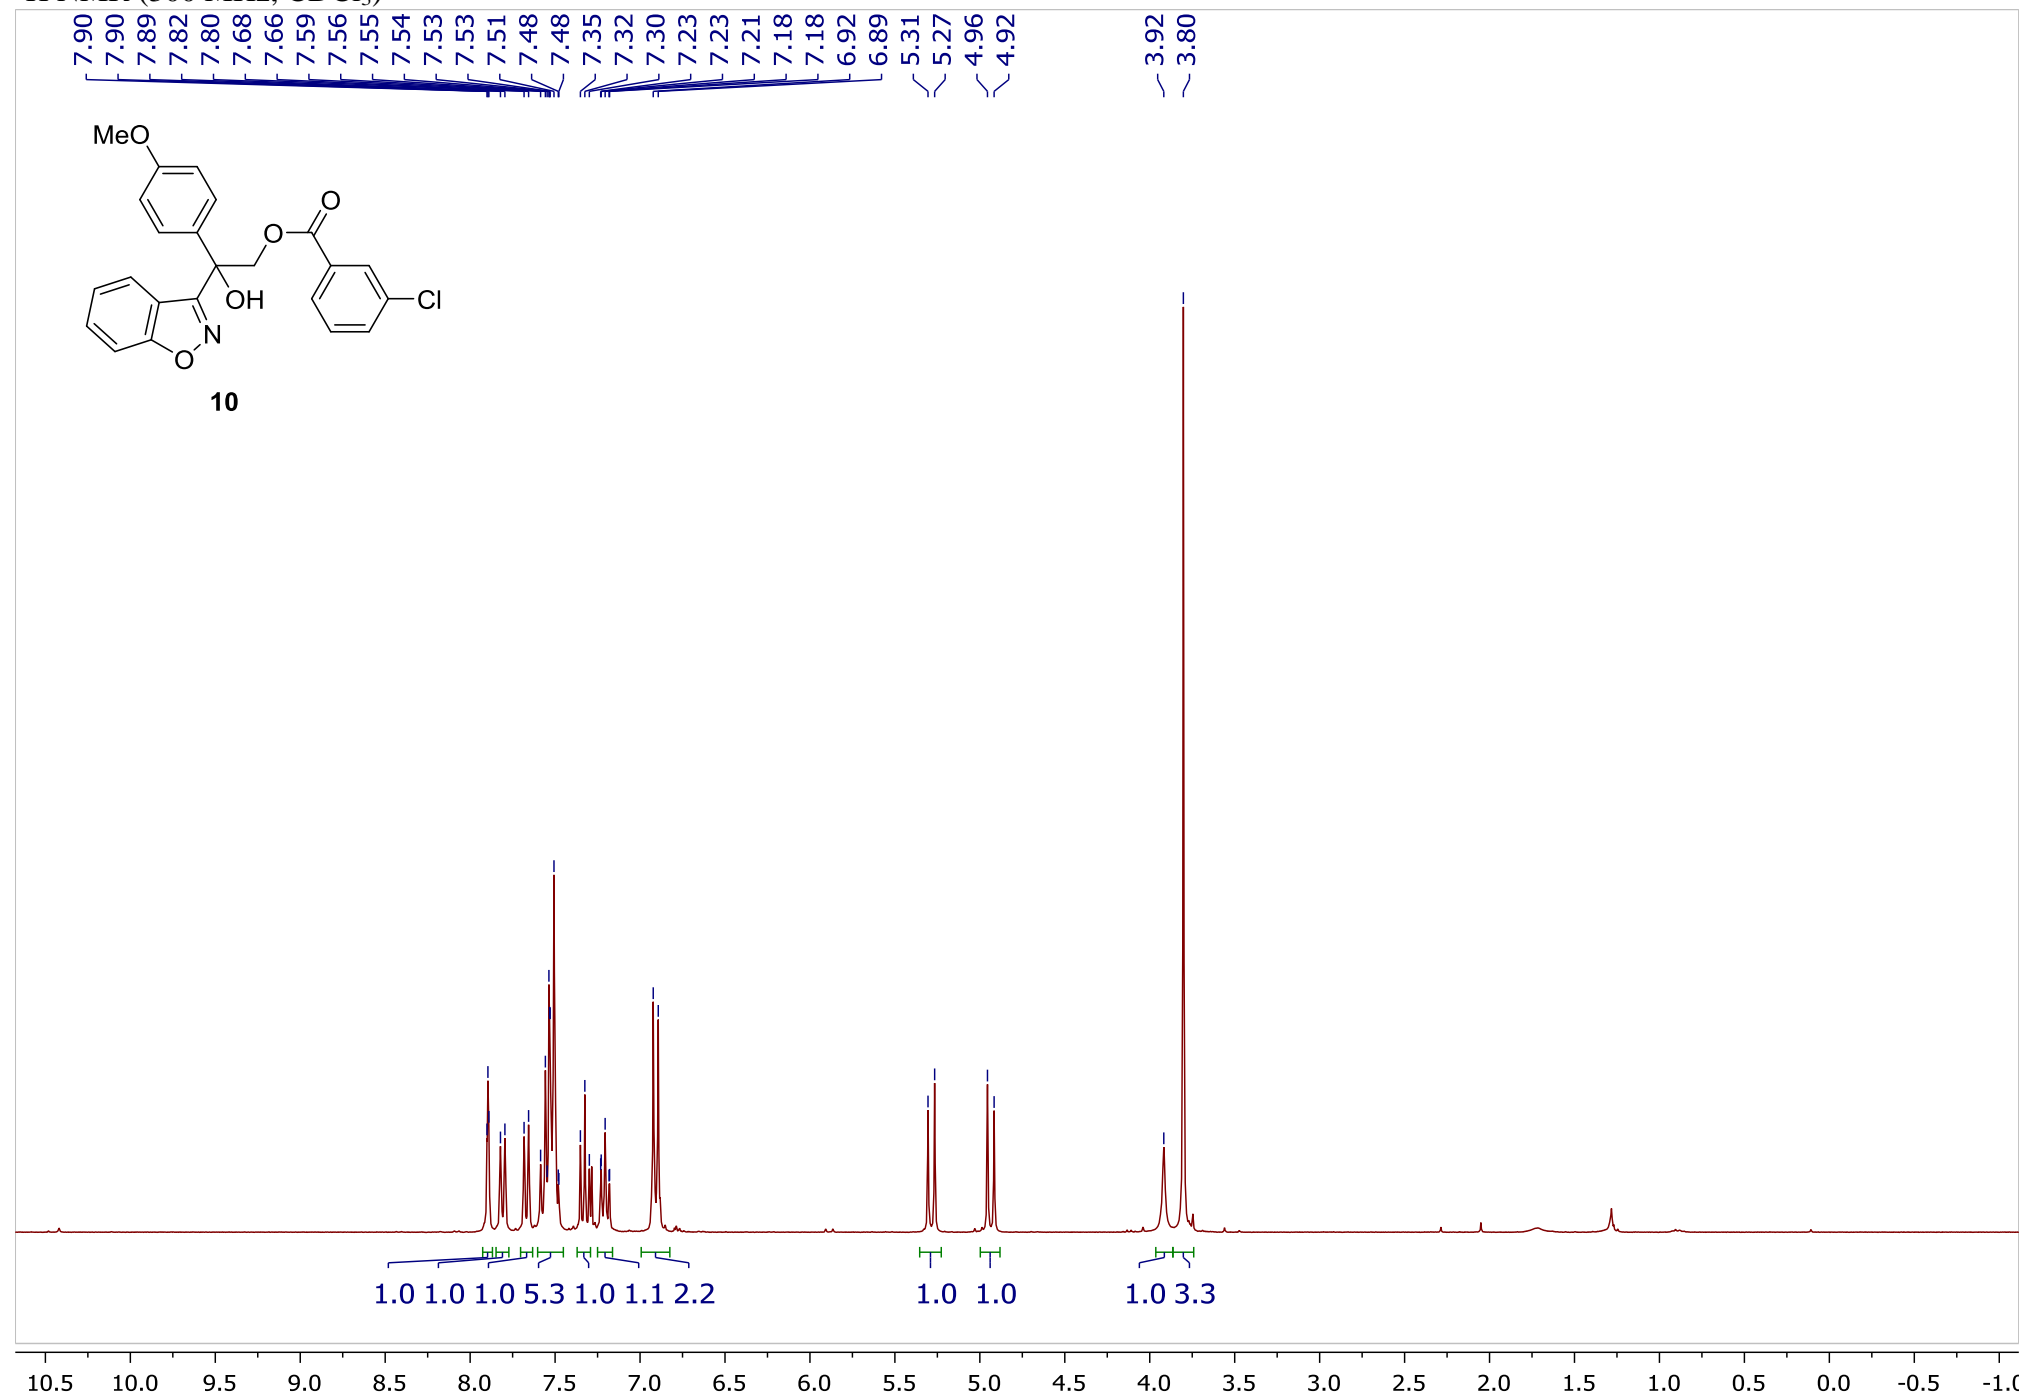

$^{13}\text{C}\{^1\text{H}\}$  NMR (75 MHz,  $\text{CDCl}_3$ )

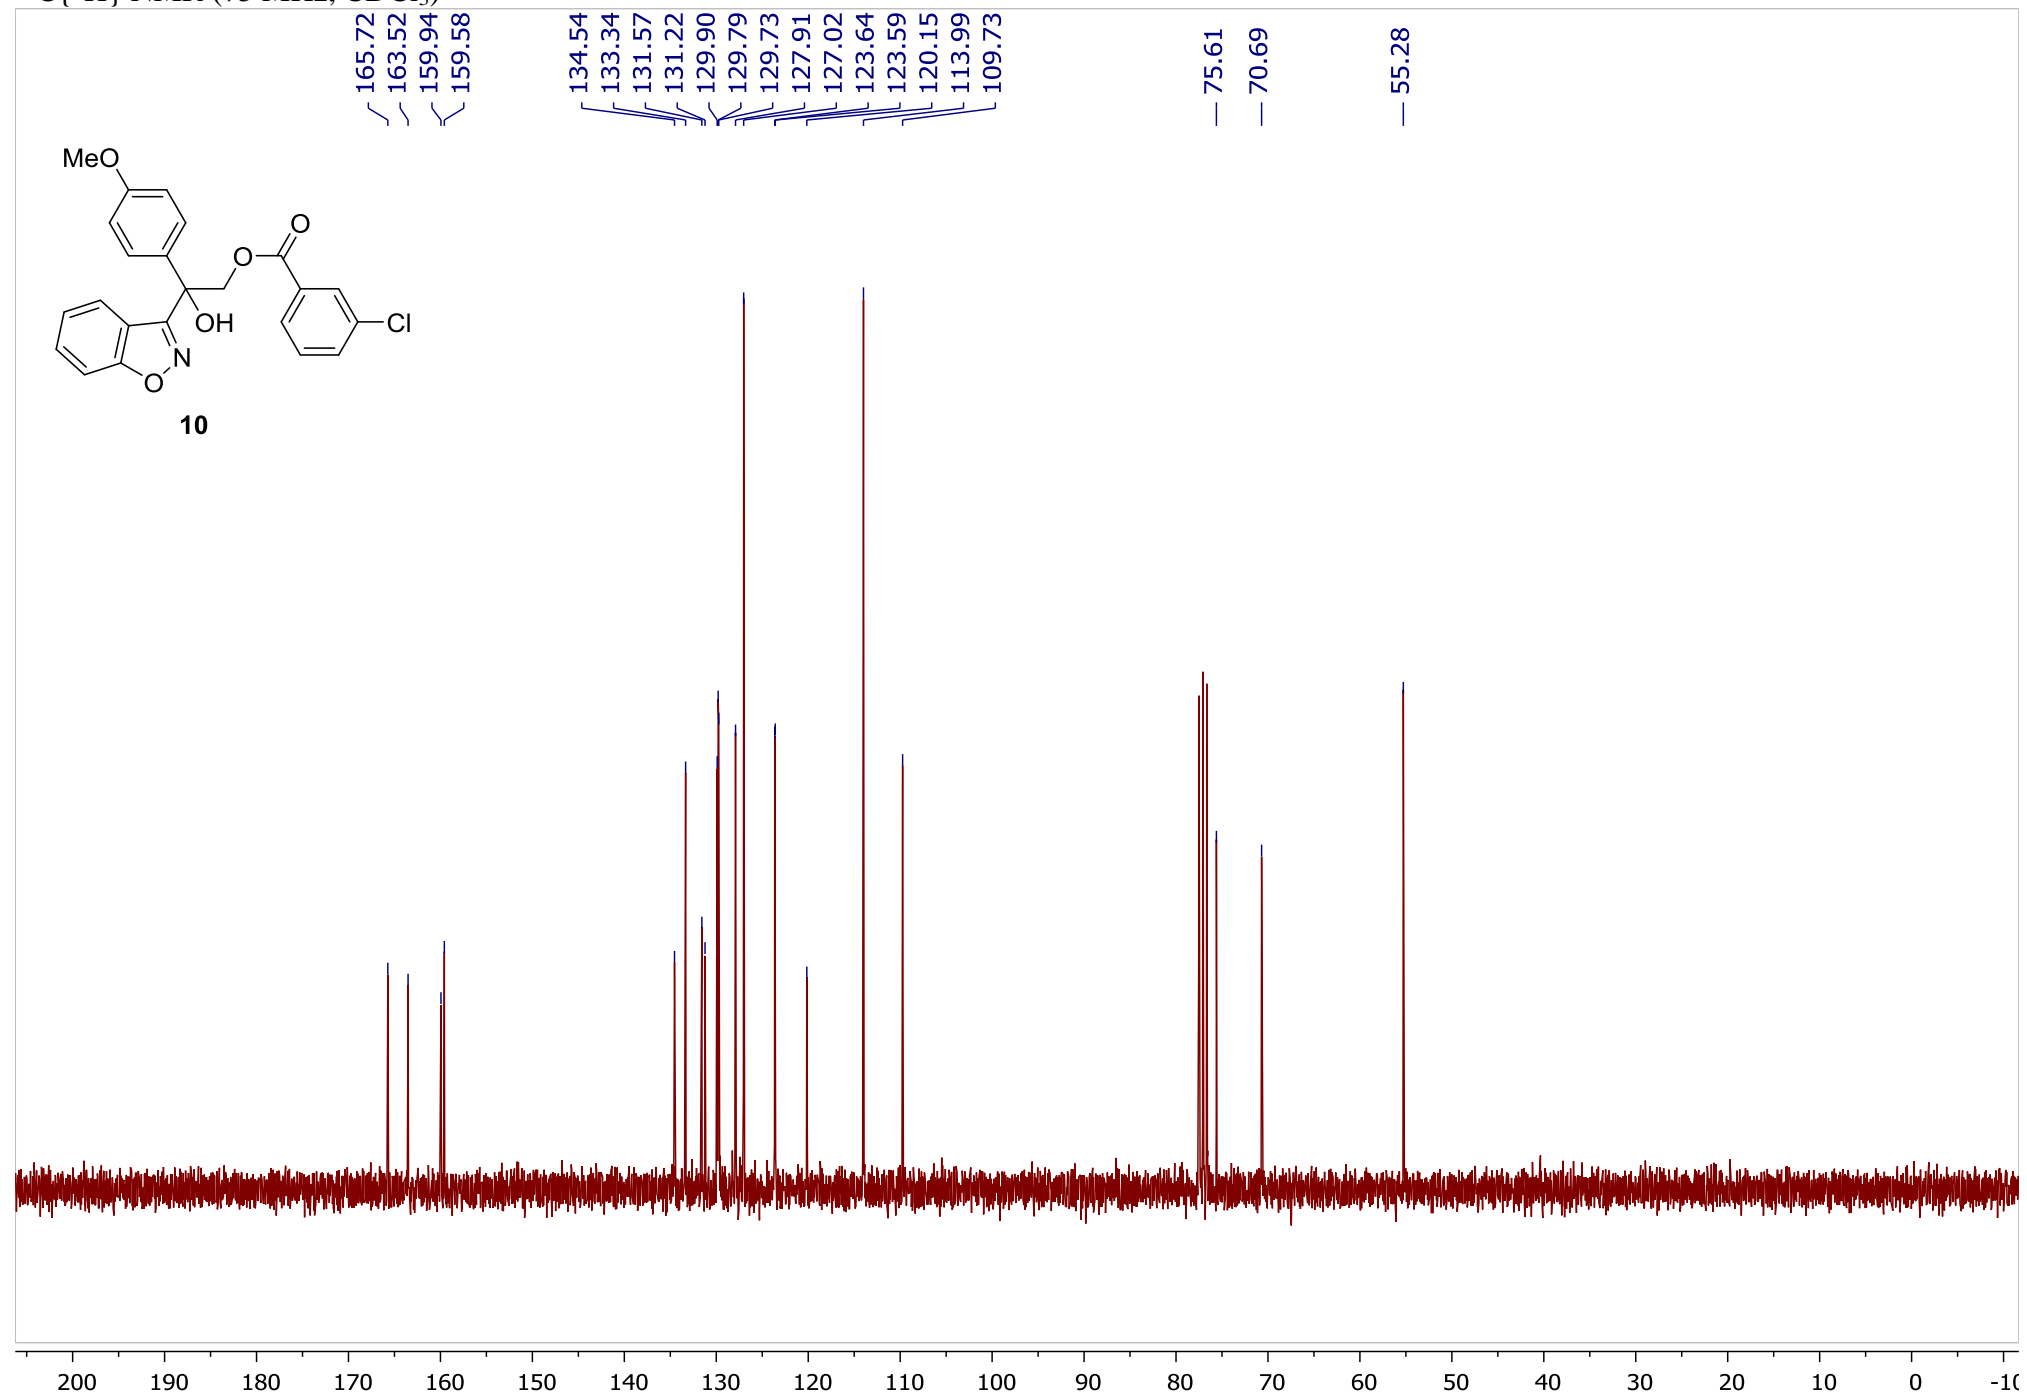

$^{13}\text{C}$  DEPT 135 (75 MHz,  $\text{CDCl}_3$ )

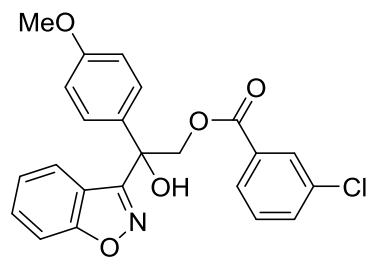

10

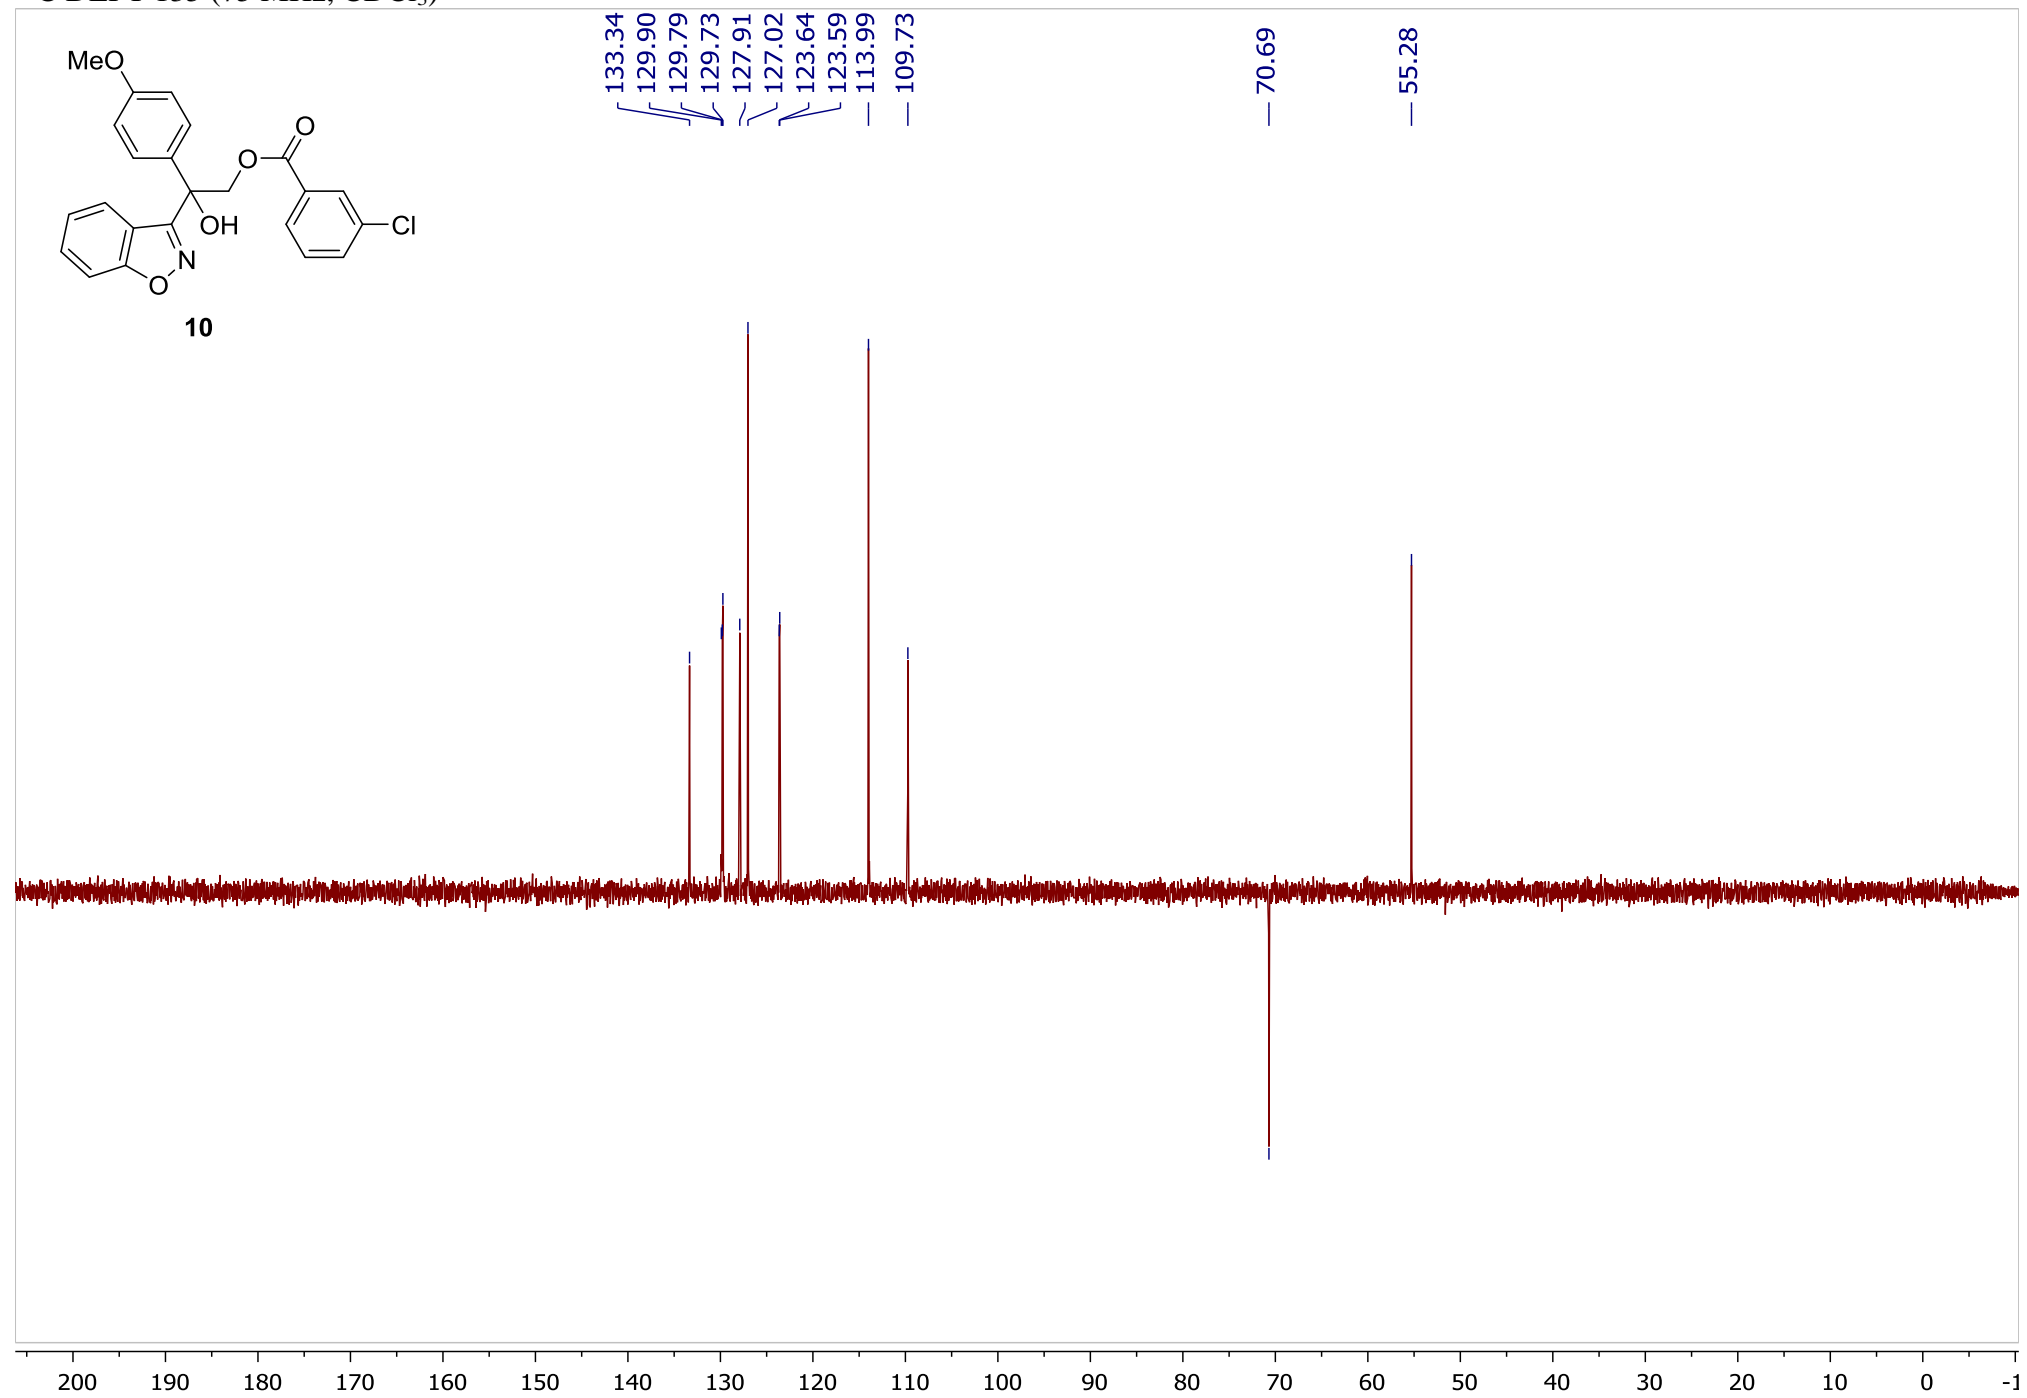

$^1\text{H}$ - $^1\text{H}$  COSY

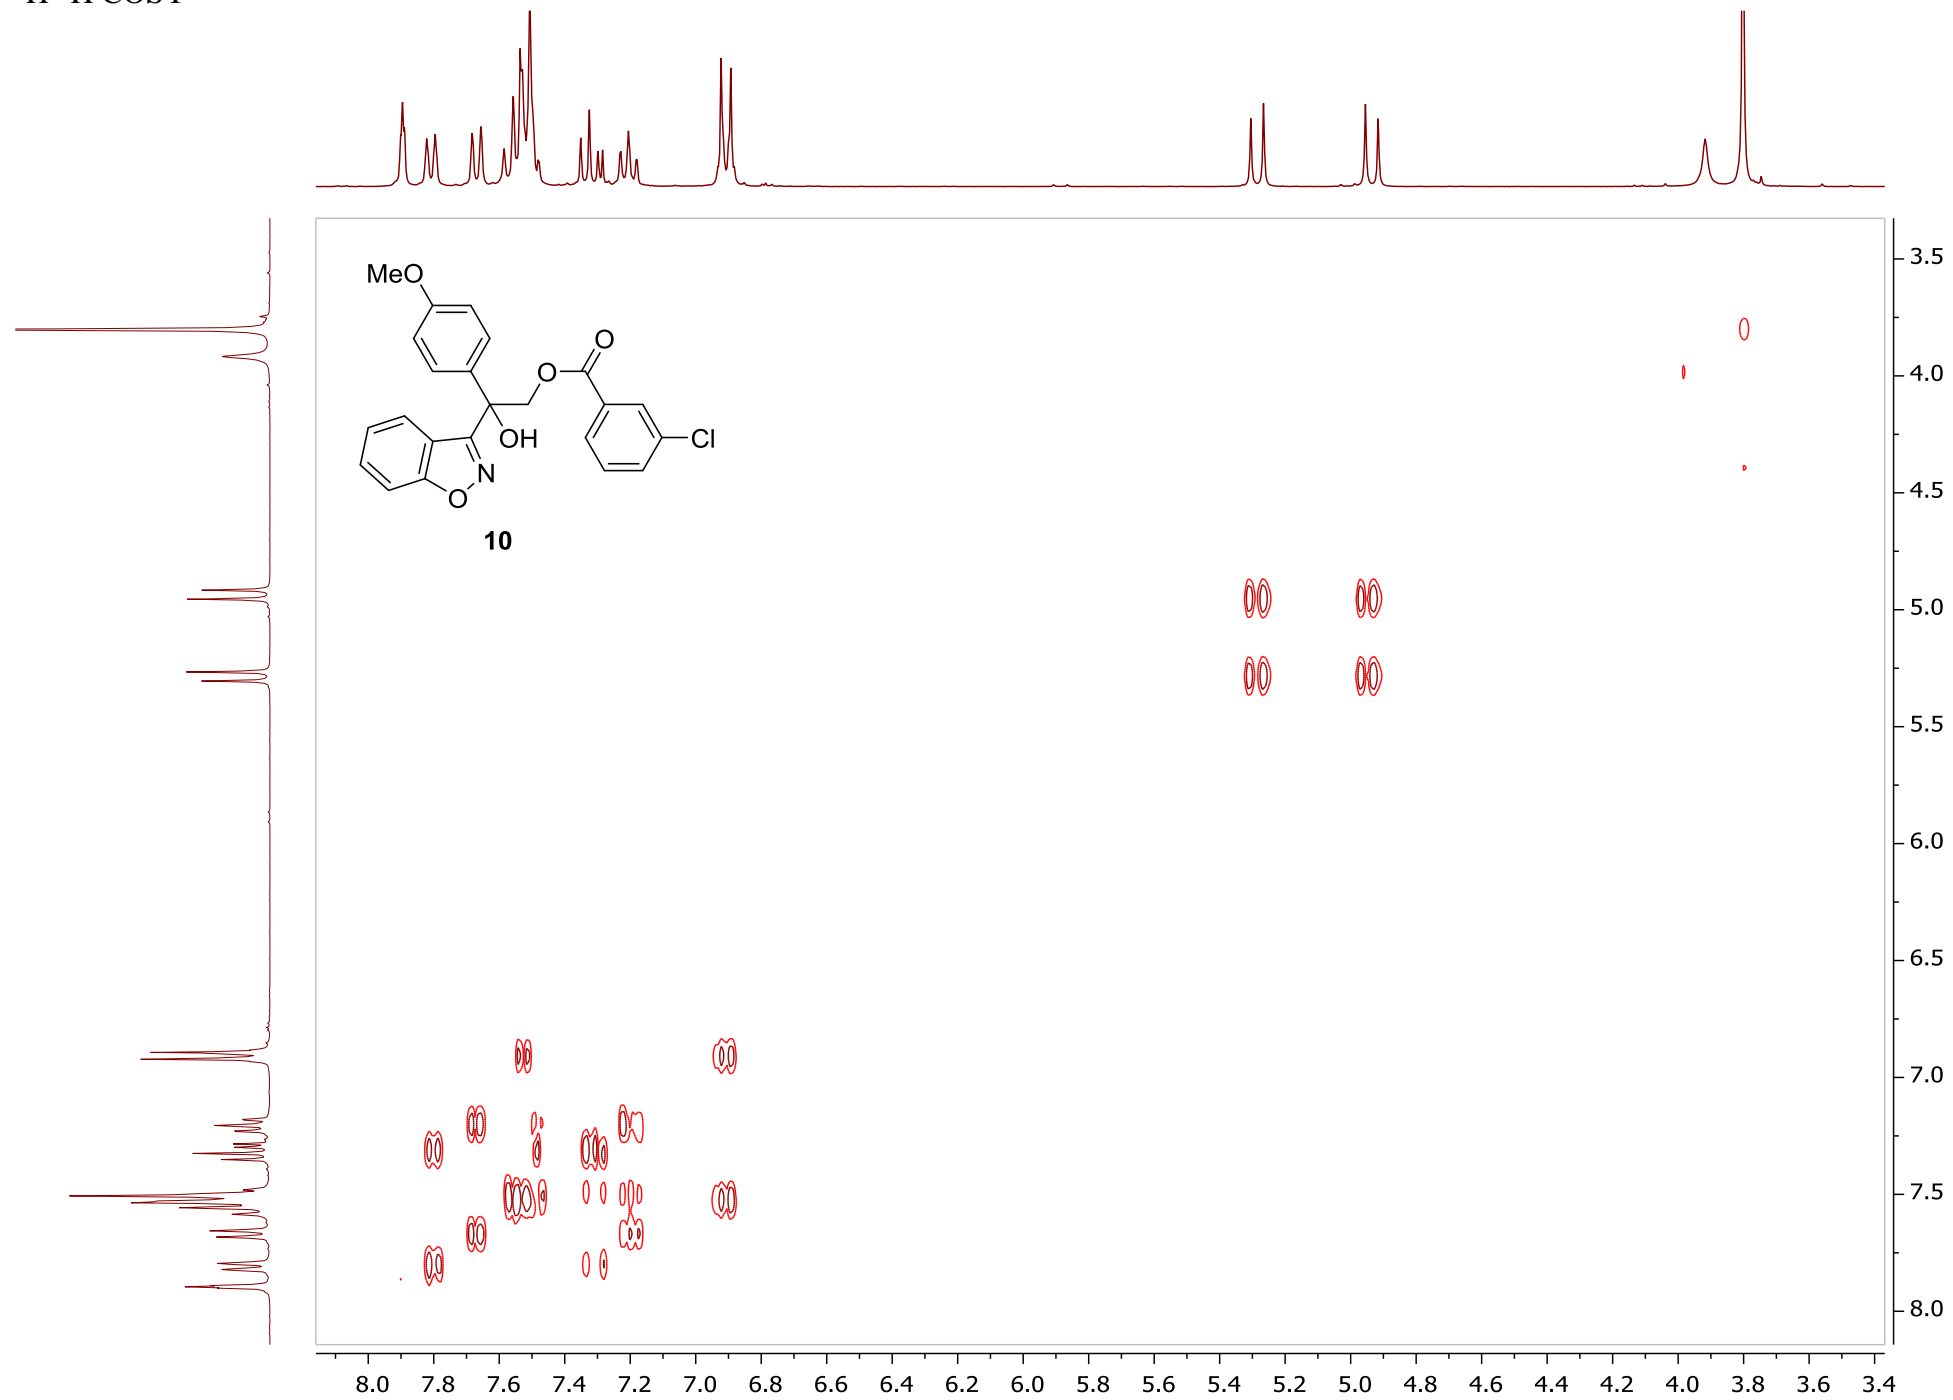

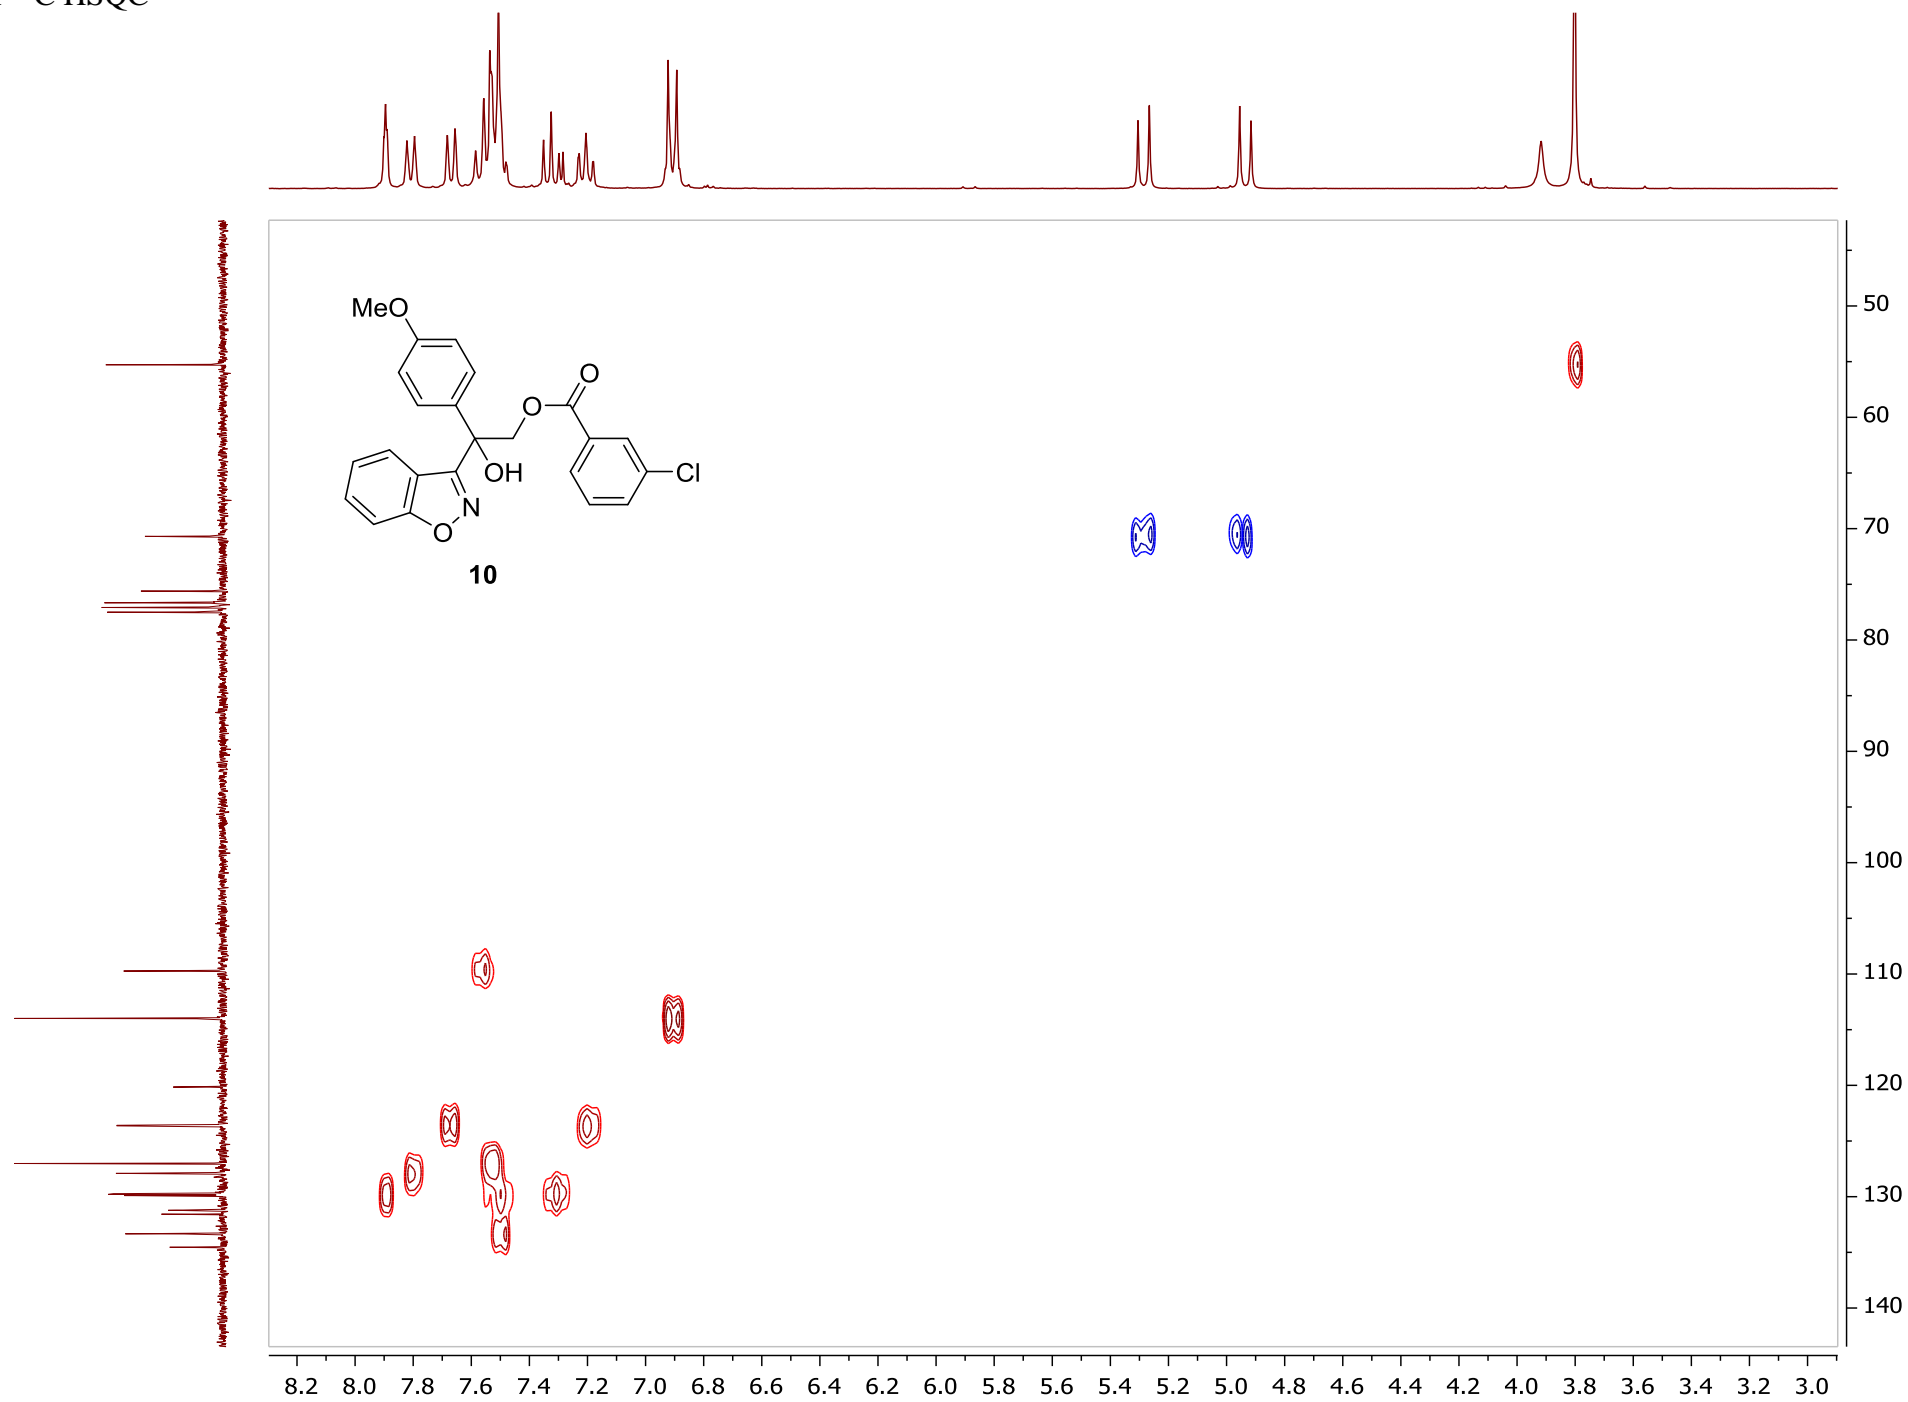

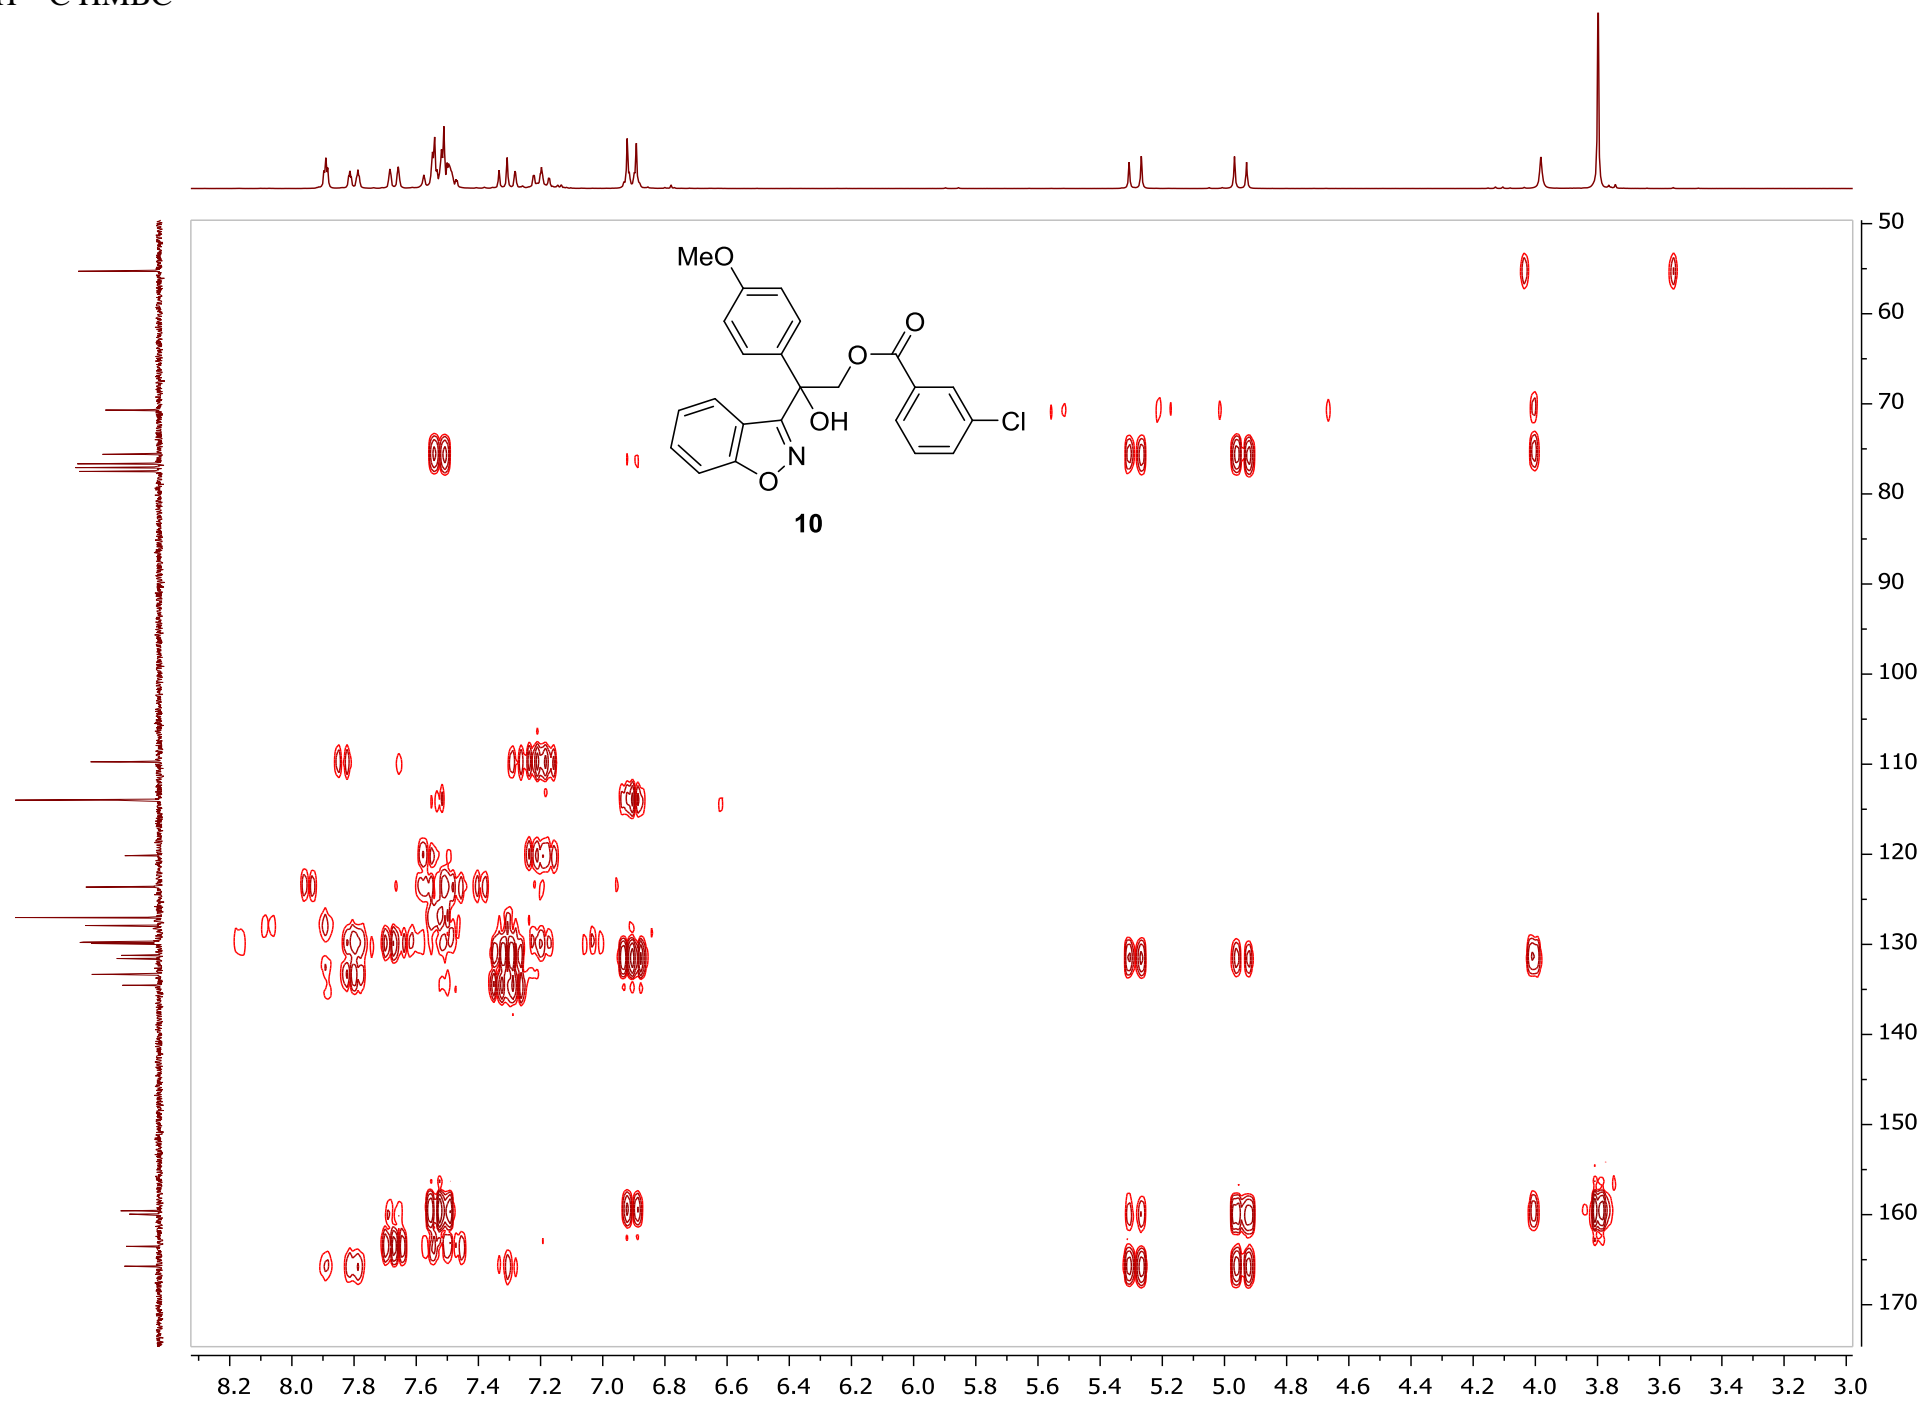

### 3-(6-Methoxy-9,10-dihydrophenanthren-9-yl)benzo[d]isoxazole 12

<sup>1</sup>H NMR (300 MHz, CDCl<sub>3</sub>)

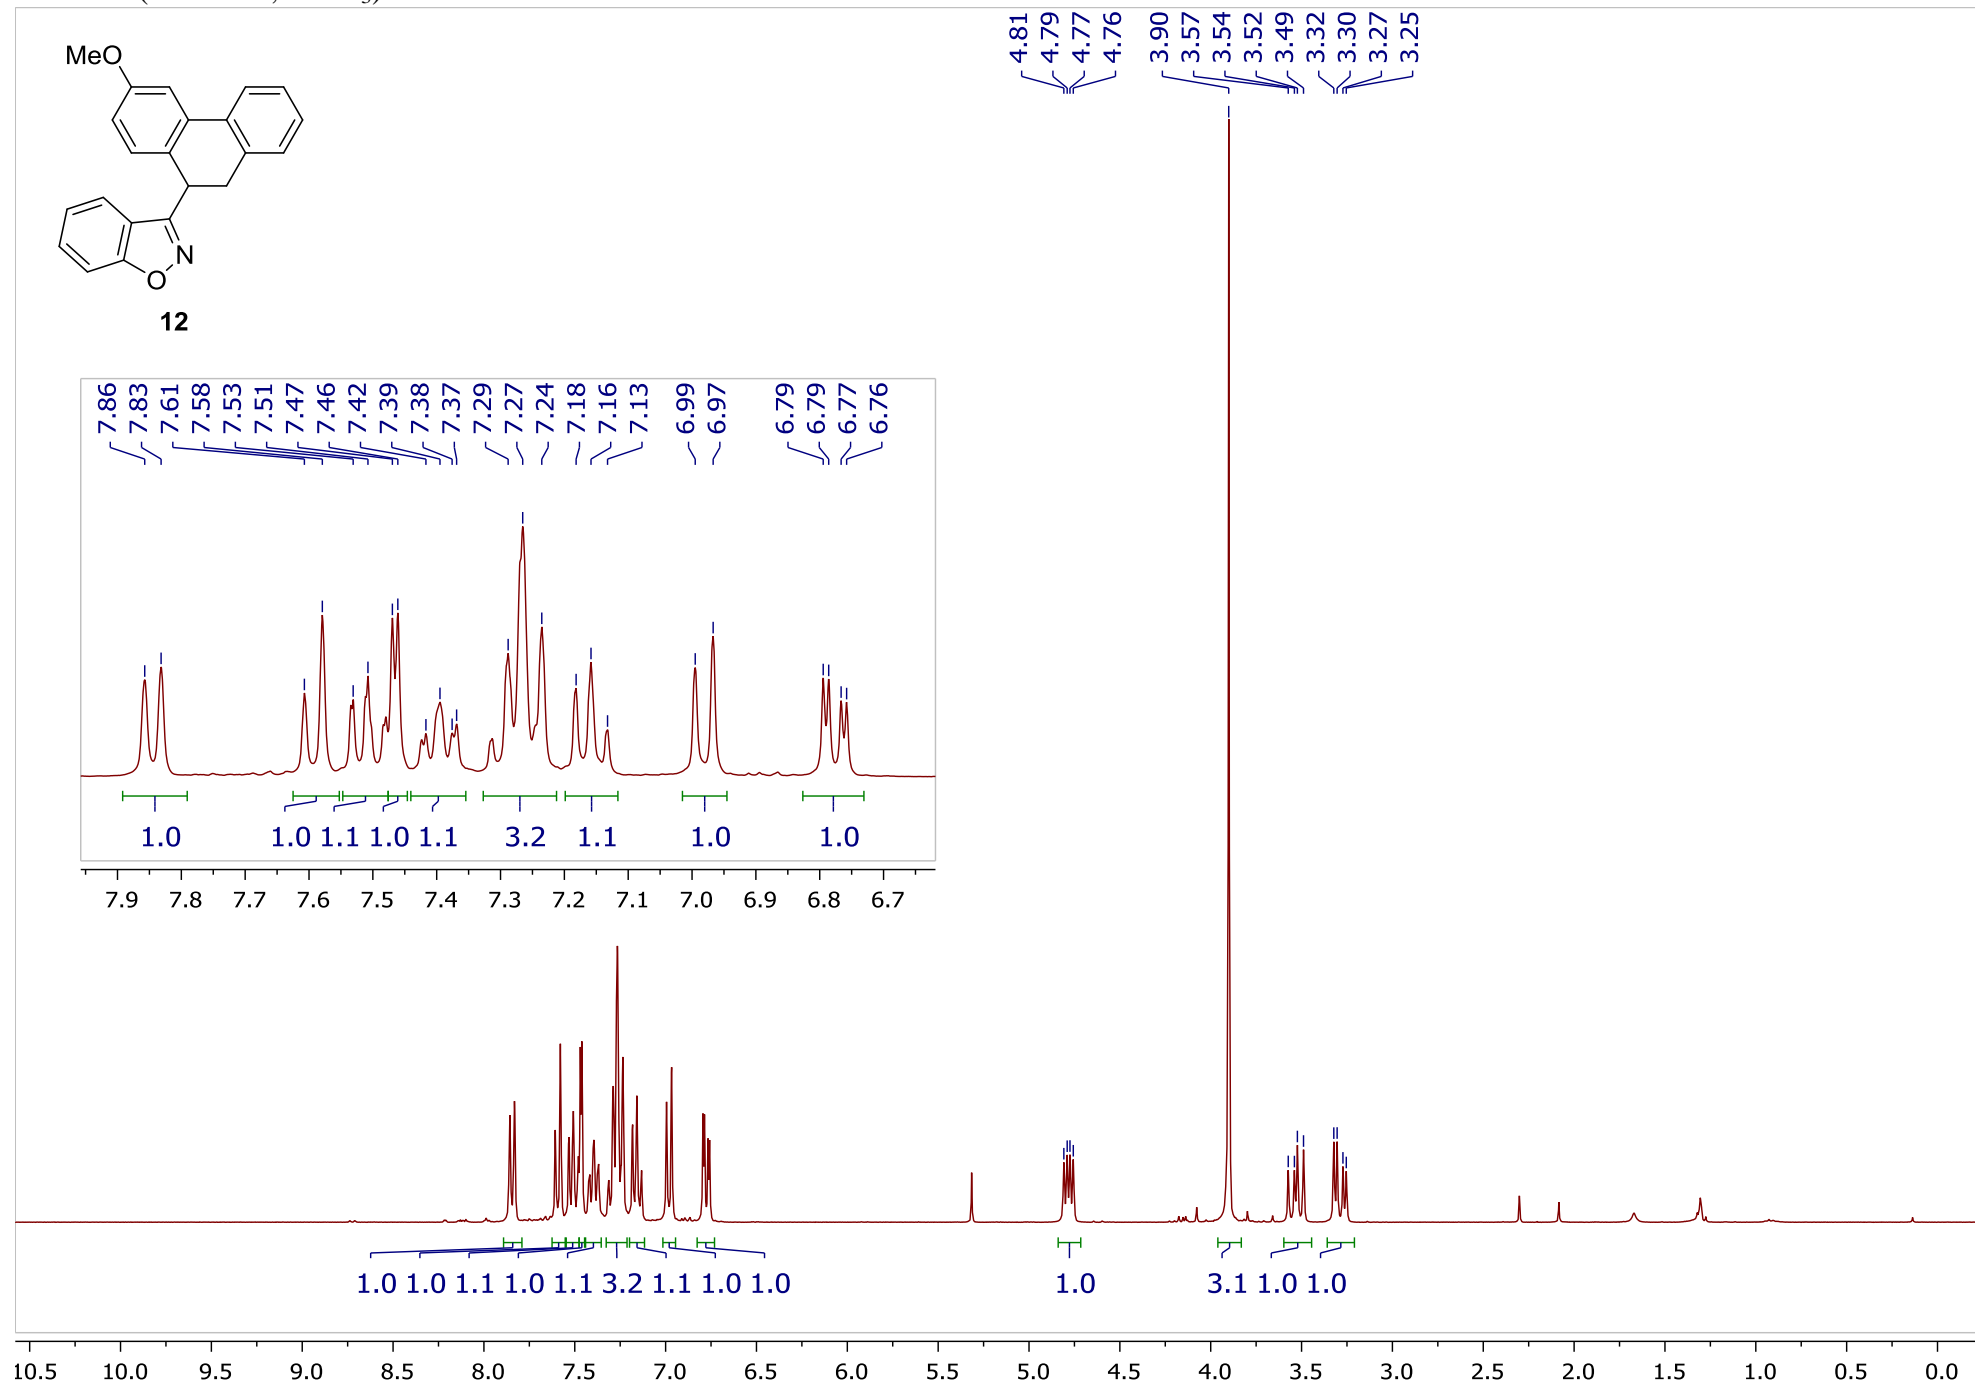



$^{13}\text{C}\{^1\text{H}\}$  NMR (75 MHz,  $\text{CDCl}_3$ )

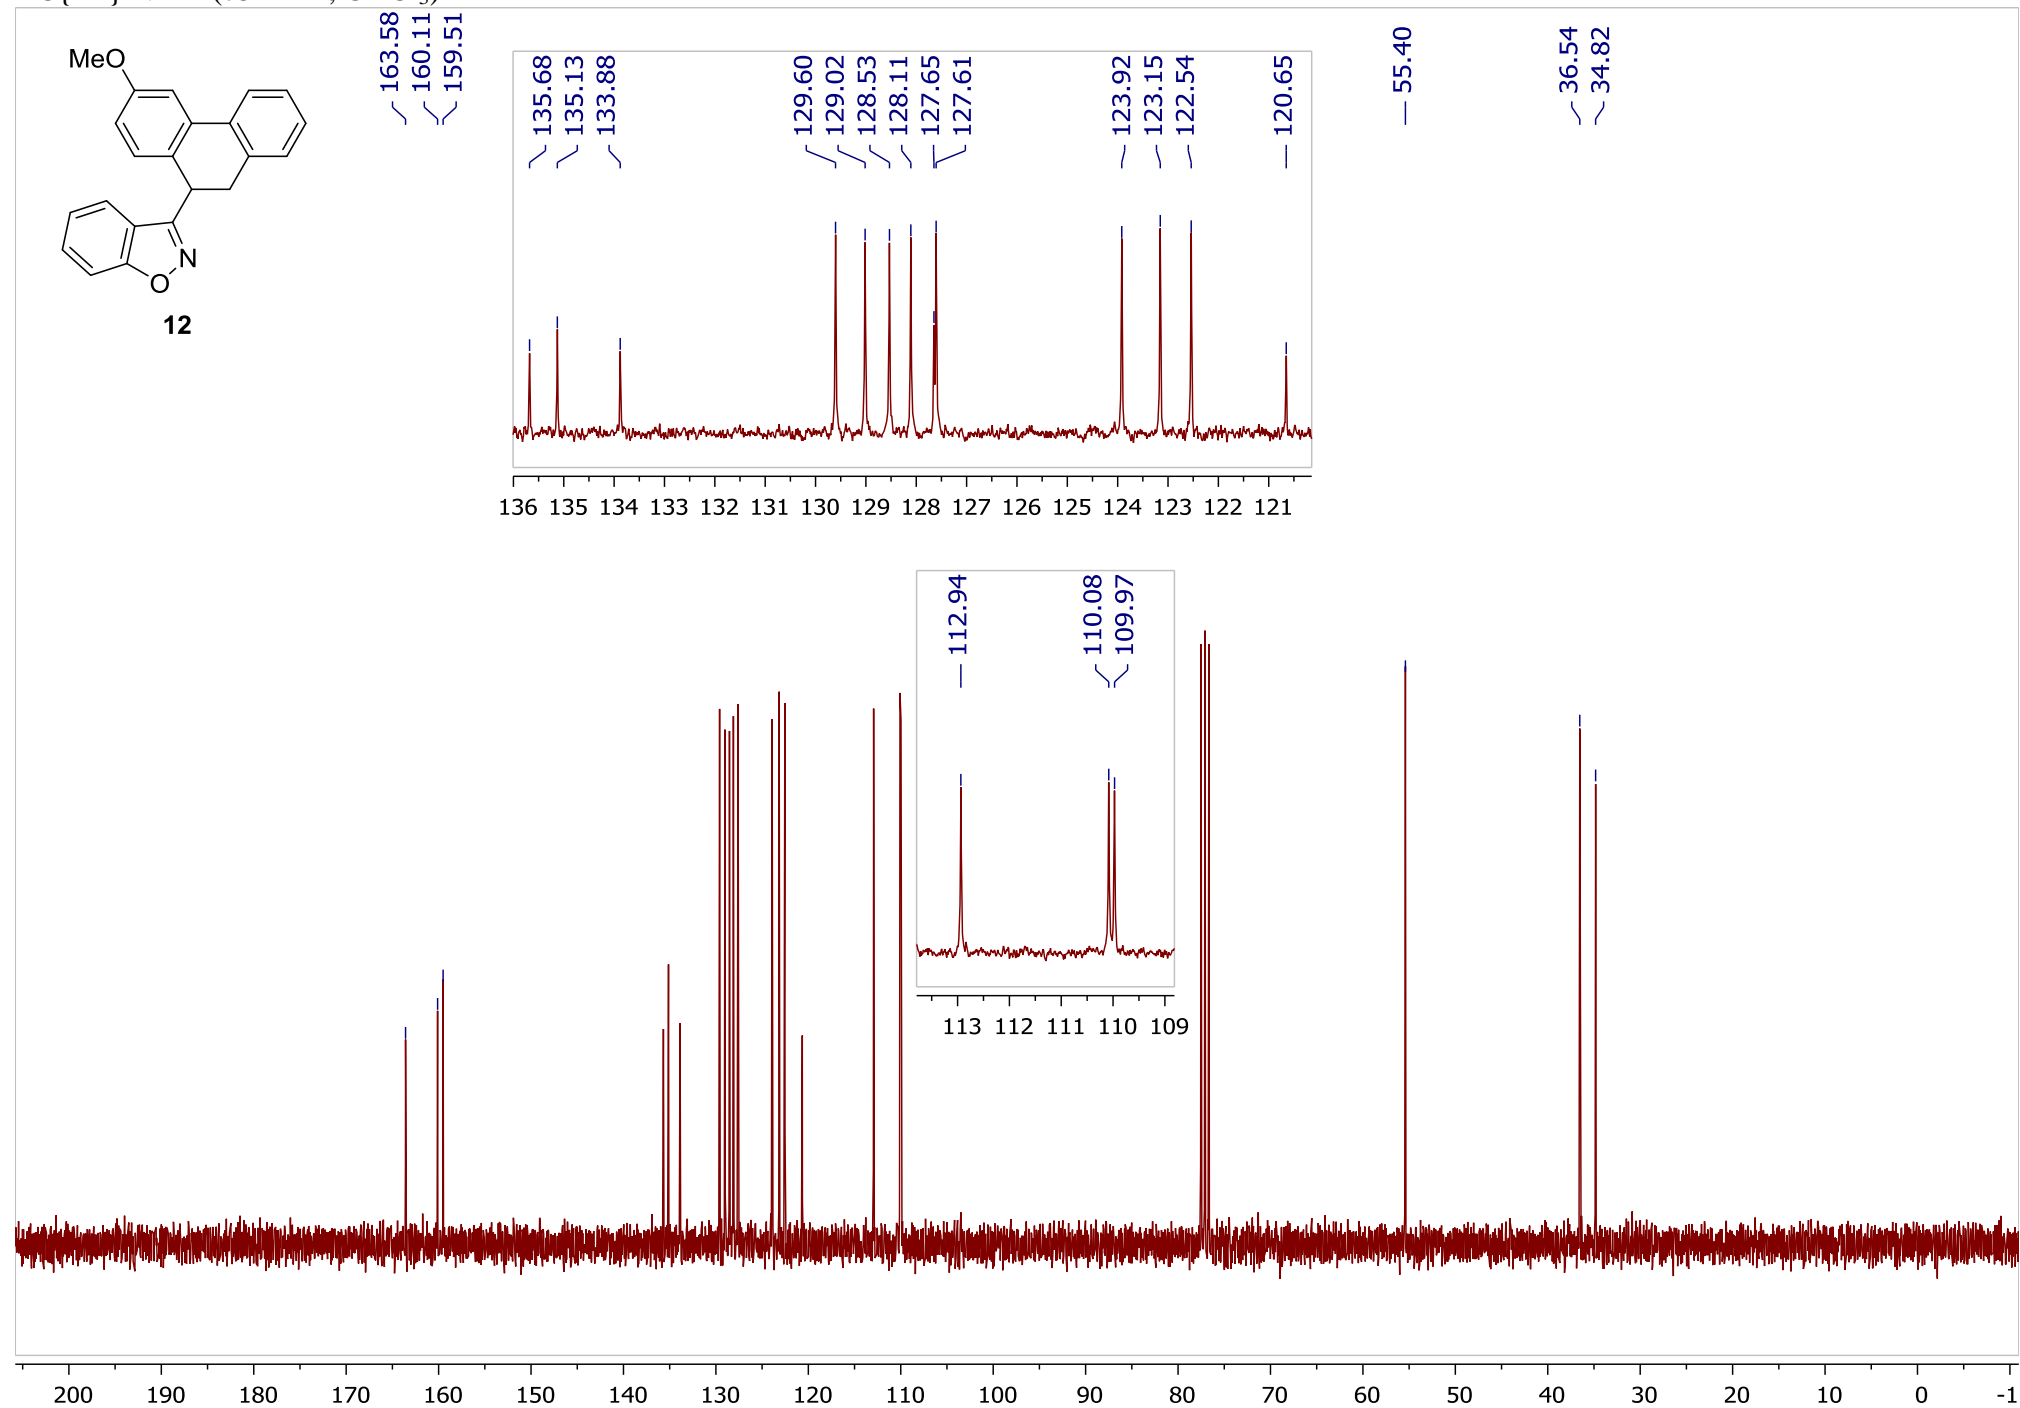

<sup>13</sup>C DEPT 135 (75 MHz, CDCl<sub>3</sub>)

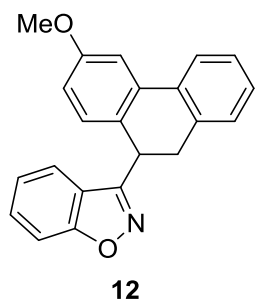

129.61  
129.02  
128.53  
128.11  
127.61  
123.92  
123.16  
122.54  
112.94  
110.09  
109.97

55.40

36.54  
34.82

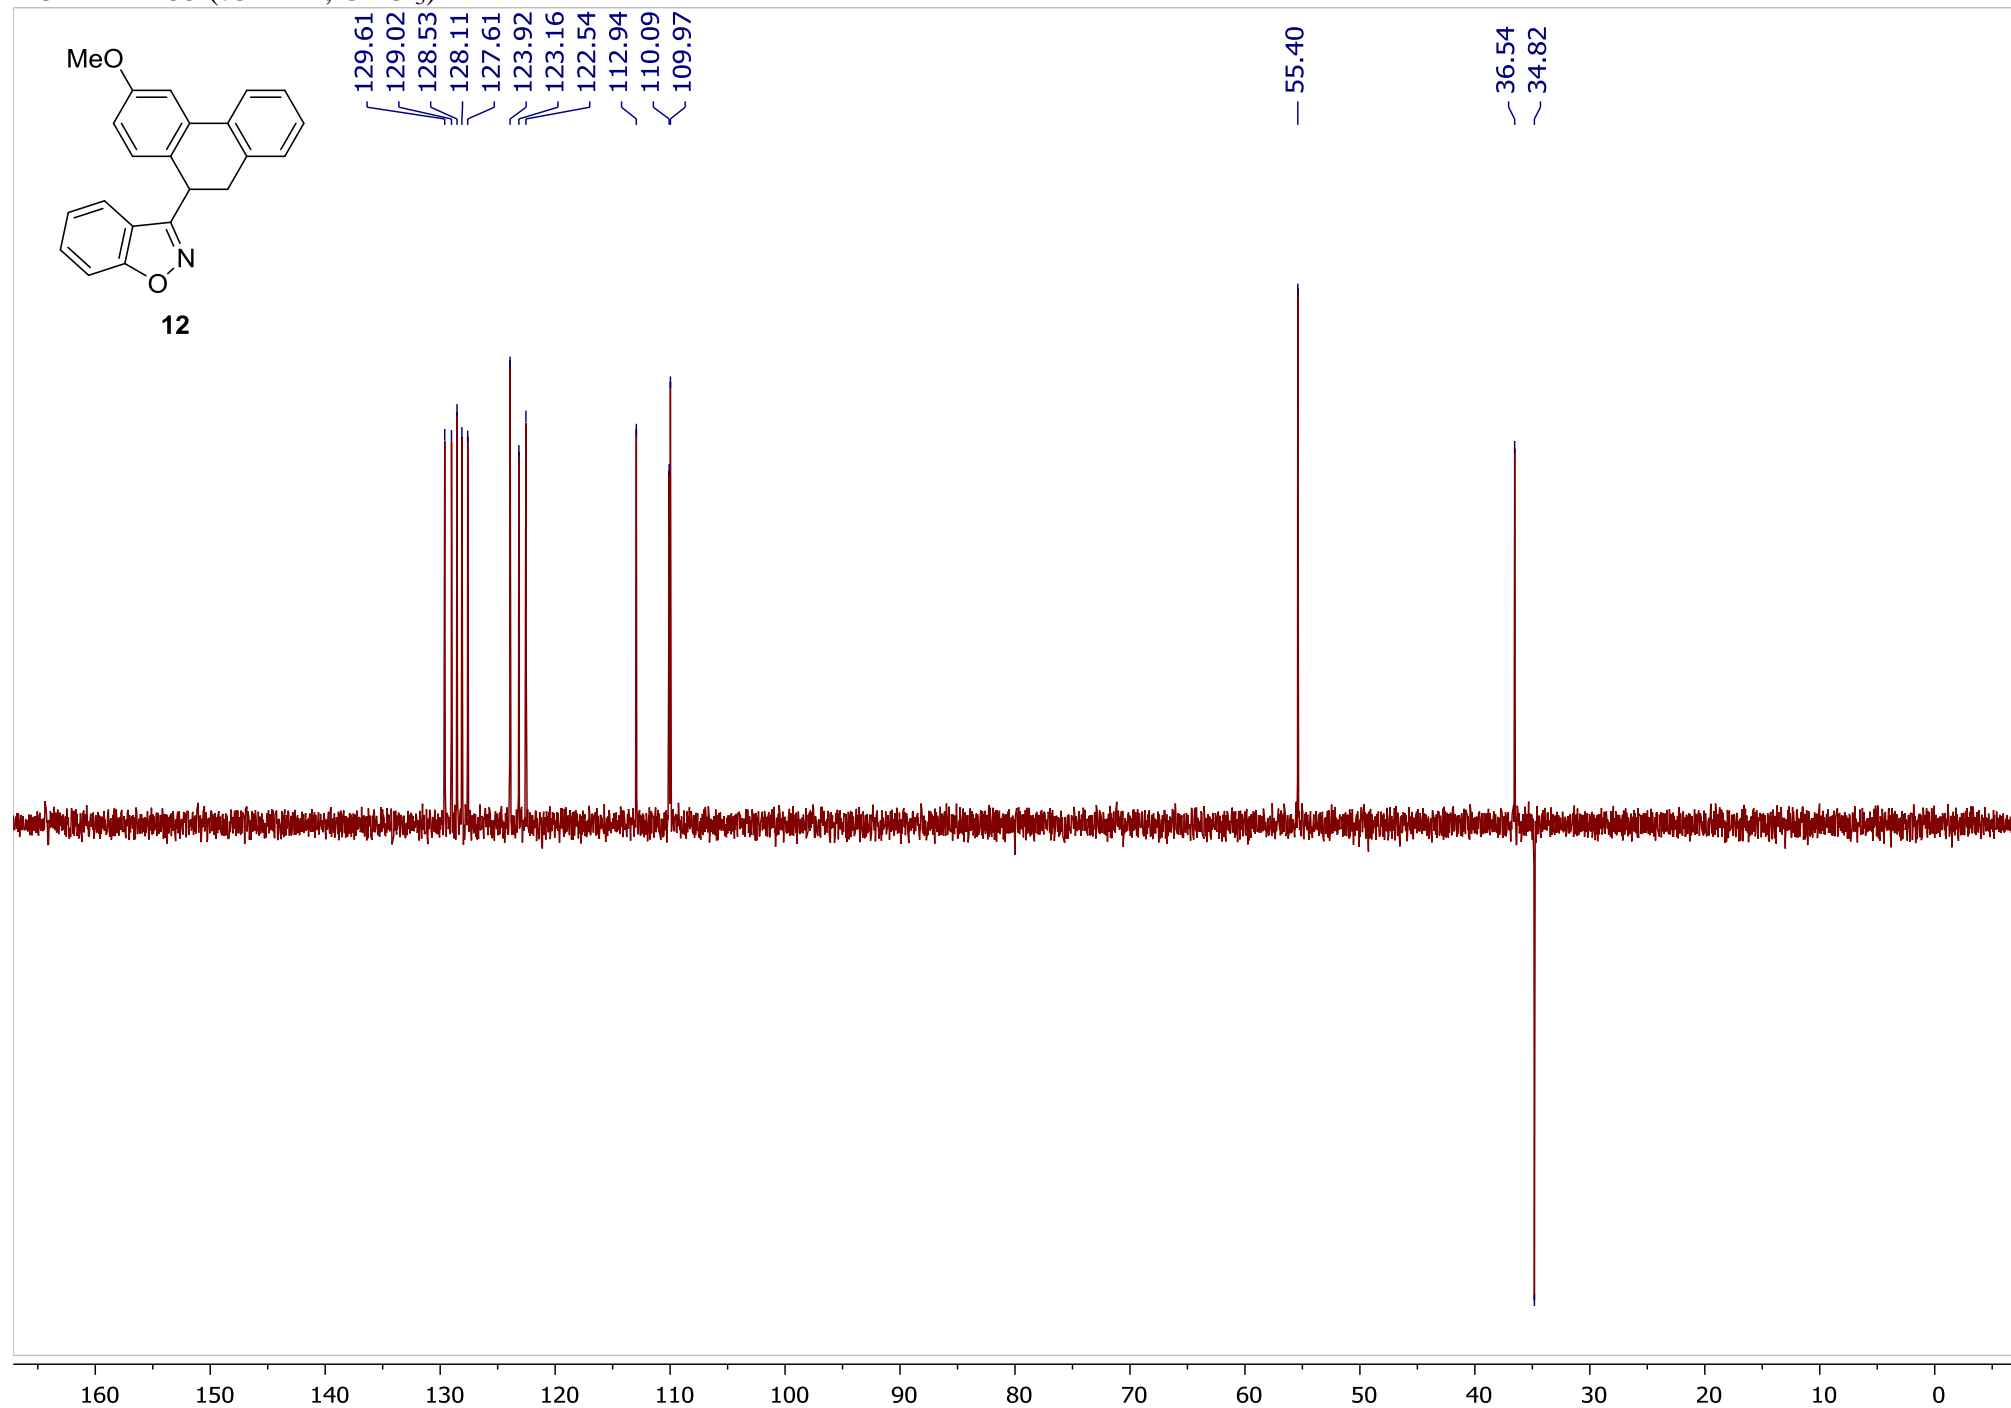

$^1\text{H}-^1\text{H}$  COSY

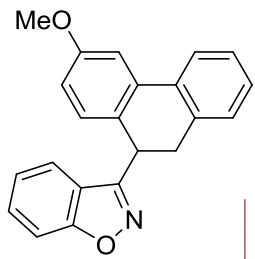

12

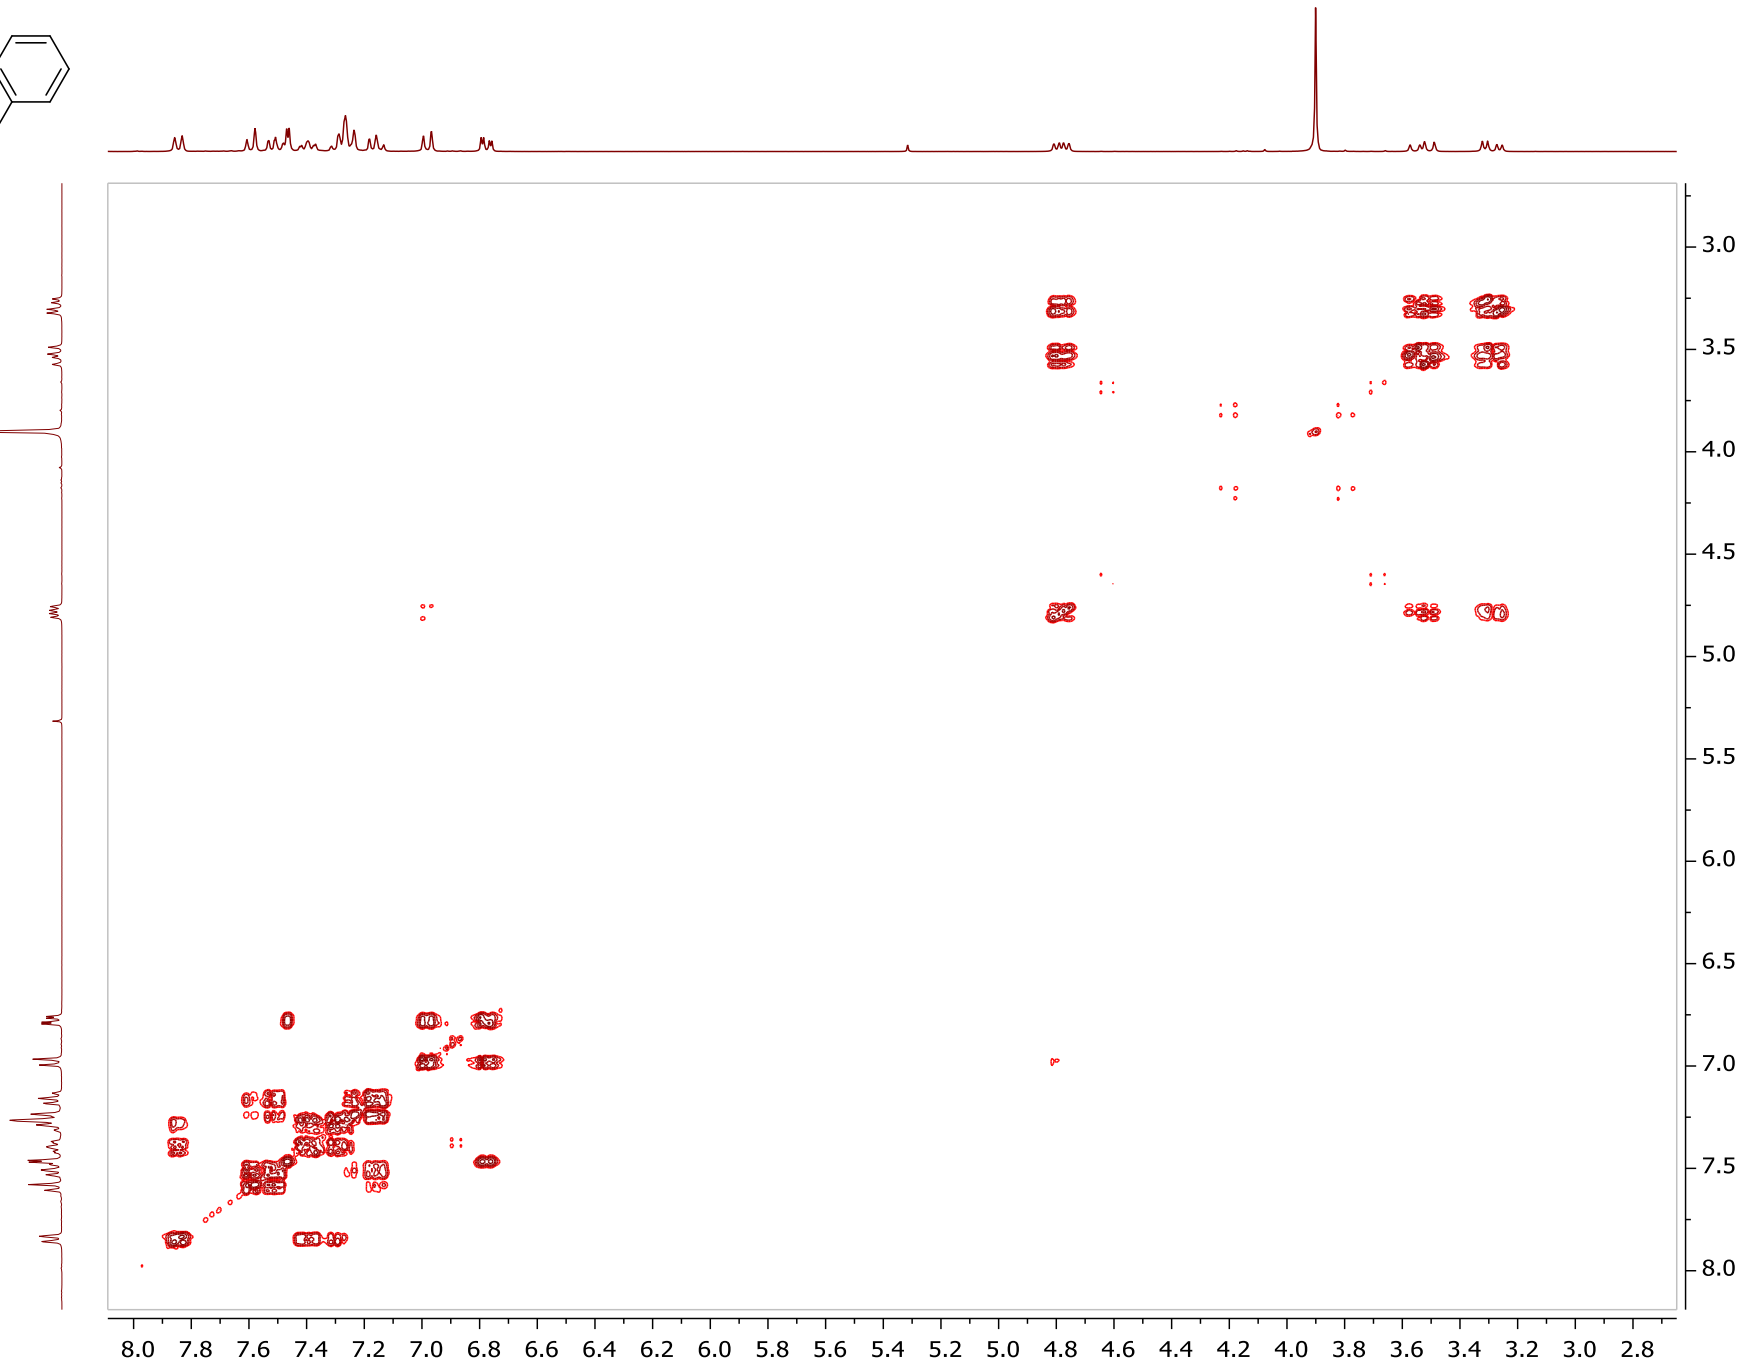

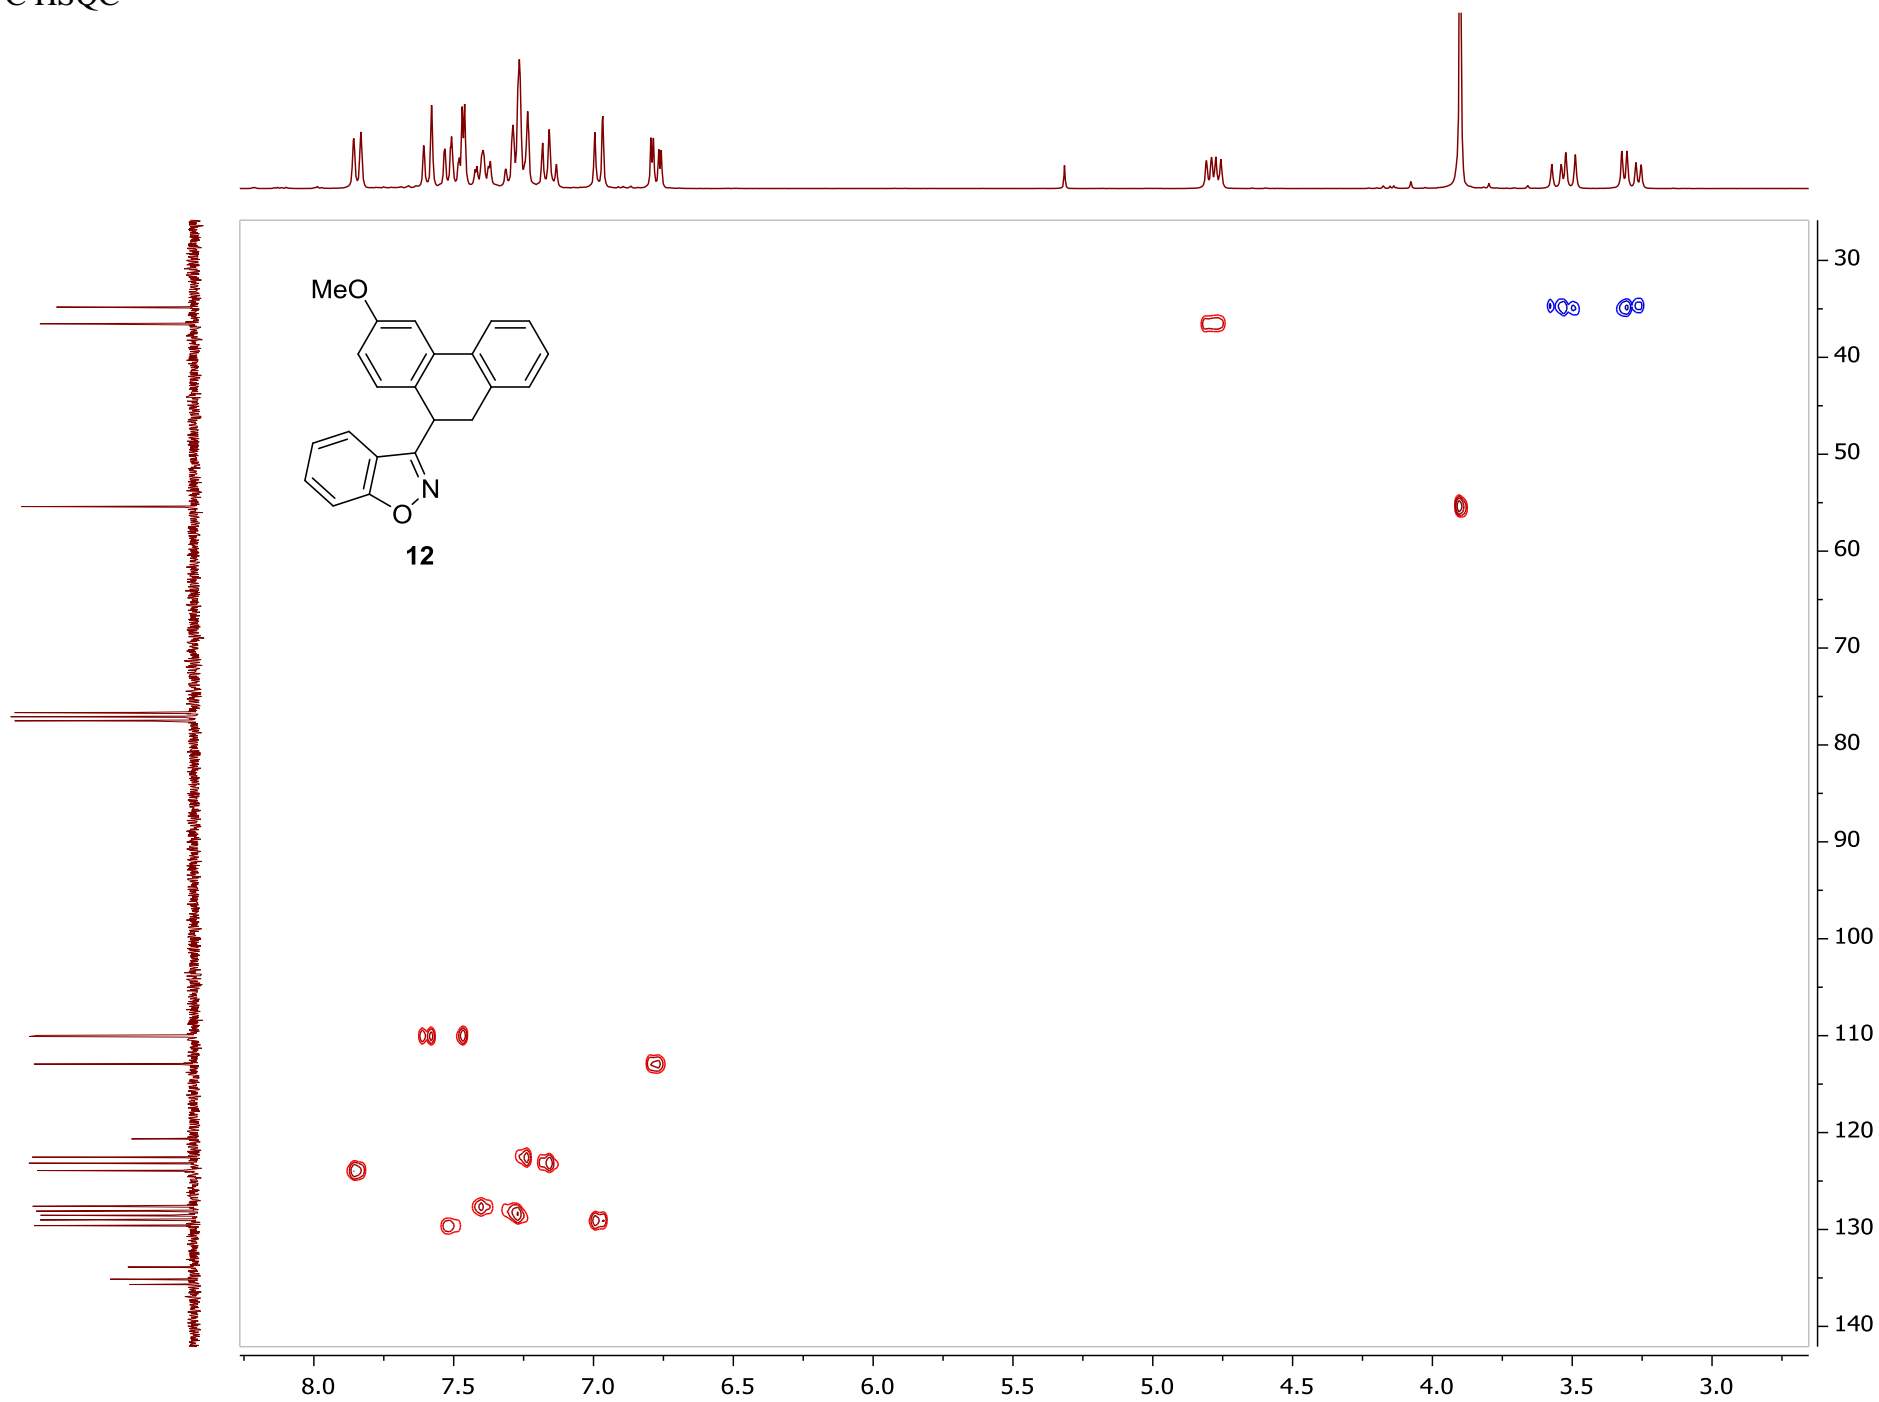

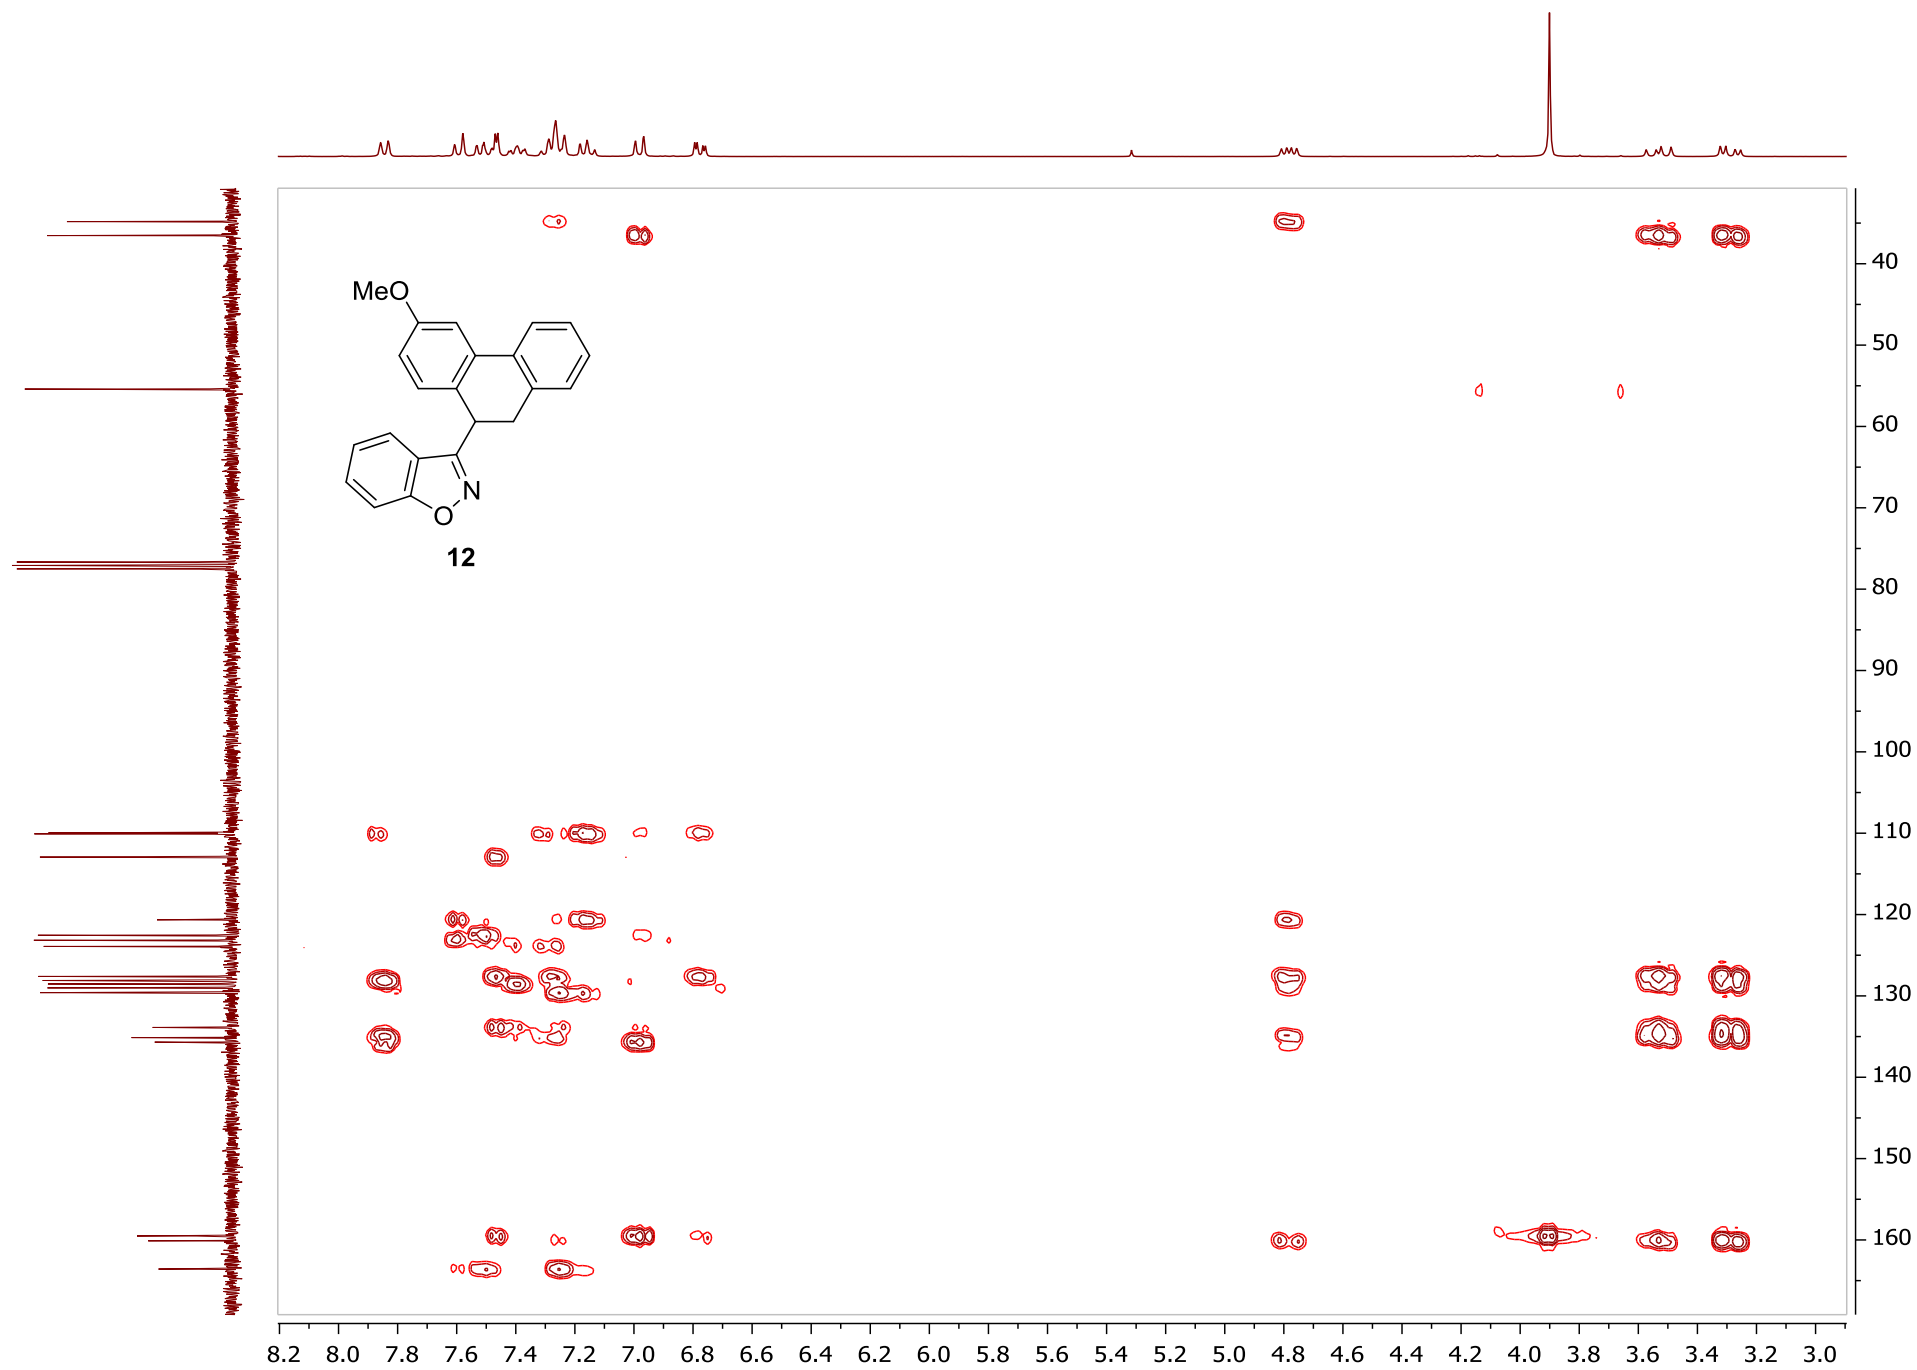

Supplement: d4ob00391h1.pdf [file d4ob00391h1.pdf]
